# Supplementary material for: Systems Biology Approach to the Dissection of the Complexity of Regulatory Networks in the S. scrofa Cardiocirculatory System
Source: MDPI journal article supplement (doi:10.3390/ijms141123160), 2013-11-21
Supplement: s2 [file s2]

## Sheet: Suppl. Table S1-Artery
Annotation Cluster 1	Enrichment Score: 5.031976945434522
Category	Term	Count	%	PValue	Genes	List Total	Pop Hits	Pop Total	Fold Enrichment	Bonferroni	Benjamini	FDR
GOTERM_CC_FAT	GO:0043292~contractile fiber	12	6.85714	2.80663e-08	PGM5, TNNC1, ILK, MYLPF, ACTN1, TPM2, CACNA1C, TPM1, VCL, ENO1, TMOD1, MYL9	127	121	12782	9.98139	7.12881e-06	7.12881e-06	3.65518e-05
GOTERM_CC_FAT	GO:0044449~contractile fiber part	11	6.28571	1.59312e-07	PGM5, TNNC1, ILK, MYLPF, ACTN1, TPM2, CACNA1C, TPM1, VCL, ENO1, MYL9	127	113	12782	9.79737	4.04644e-05	2.02324e-05	0.000207478
GOTERM_CC_FAT	GO:0030016~myofibril	10	5.71429	1.4301e-06	PGM5, TNNC1, ILK, ACTN1, TPM2, CACNA1C, TPM1, VCL, ENO1, TMOD1	127	111	12782	9.06718	0.000363179	0.000121074	0.00186246
GOTERM_CC_FAT	GO:0015629~actin cytoskeleton	13	7.42857	1.36681e-05	TNNC1, MYLPF, TPM2, CAPZB, TPM1, FLNA, VCL, MYL9, SMTN, PGM5, ILK, CDC42EP3, MYH10	127	269	12782	4.86392	0.00346571	0.000694105	0.0177991
SP_PIR_KEYWORDS	muscle protein	6	3.42857	0.000208877	TAGLN, TNNC1, MYLPF, TPM2, TPM1, MYL9	175	60	19235	10.9914	0.0627064	0.0128682	0.280154
GOTERM_CC_FAT	GO:0030017~sarcomere	7	4	0.000408879	PGM5, TNNC1, ACTN1, TPM2, CACNA1C, TPM1, ENO1	127	98	12782	7.18898	0.0986633	0.00861901	0.531192
GOTERM_MF_FAT	GO:0008307~structural constituent of muscle	5	2.85714	0.000800144	SMTN, MYLPF, TPM2, TPM1, MYL9	131	42	12983	11.7984	0.268737	0.0990695	1.10663
Annotation Cluster 2	Enrichment Score: 4.084416173563023
Category	Term	Count	%	PValue	Genes	List Total	Pop Hits	Pop Total	Fold Enrichment	Bonferroni	Benjamini	FDR
GOTERM_MF_FAT	GO:0008092~cytoskeletal protein binding	20	11.4286	6.11819e-07	TLN1, KIF5B, TNNC1, BAIAP2, ACTN1, TPM2, NEXN, CAPZB, TPM1, FLNA, VCL, SMTN, PACSIN3, TAGLN, FHOD3, MAPRE2, CNN1, CDC42EP3, MYH10, TMOD1	131	504	12983	3.93281	0.000239193	0.000239193	0.000850538
GOTERM_MF_FAT	GO:0003779~actin binding	15	8.57143	4.74636e-06	TLN1, TNNC1, ACTN1, NEXN, TPM2, CAPZB, TPM1, FLNA, VCL, SMTN, TAGLN, FHOD3, CNN1, MYH10, TMOD1	131	326	12983	4.56013	0.00185411	0.000927485	0.00659812
GOTERM_CC_FAT	GO:0015629~actin cytoskeleton	13	7.42857	1.36681e-05	TNNC1, MYLPF, TPM2, CAPZB, TPM1, FLNA, VCL, MYL9, SMTN, PGM5, ILK, CDC42EP3, MYH10	127	269	12782	4.86392	0.00346571	0.000694105	0.0177991
SP_PIR_KEYWORDS	actin-binding	12	6.85714	1.5997e-05	TAGLN, FHOD3, ACTN1, CNN1, TPM2, NEXN, TPM1, CAPZB, FLNA, MYH10, VCL, TMOD1	175	247	19235	5.33997	0.00494682	0.00247648	0.0214815
GOTERM_CC_FAT	GO:0005856~cytoskeleton	30	17.1429	5.89961e-05	TLN1, TNNC1, VIM, TPM2, CAPZB, TPM1, MYL9, VCL, APP, ILK, CDC42EP3, ACTB, KIF5B, DYNLT3, MYLPF, ACTN1, NEXN, FLNA, PGM5, SMTN, FHOD3, SGCD, SLC13A3, MAPRE2, ABL1, MAP7D1, CACNA1C, TBL1X, TMOD1, MYH10	127	1381	12782	2.18637	0.0148737	0.00187143	0.0768057
SP_PIR_KEYWORDS	cytoskeleton	18	10.2857	6.77541e-05	ACTB, TLN1, KIF5B, ACTN1, NEXN, TPM2, CAPZB, TPM1, FLNA, VCL, PGM5, SMTN, FHOD3, SGCD, ABL1, MAP7D1, CDC42EP3, TMOD1	175	636	19235	3.11078	0.0207854	0.00523736	0.0909542
GOTERM_BP_FAT	GO:0030036~actin cytoskeleton organization	11	6.28571	8.31107e-05	TLN1, FHOD3, ACTN1, CYTH2, CNN1, ABL1, TPM1, CAPZB, FLNA, MYH10, TMOD1	135	226	13528	4.87735	0.119118	0.119118	0.138288
GOTERM_BP_FAT	GO:0007010~cytoskeleton organization	15	8.57143	0.000106449	TLN1, ACTN1, CYTH2, CAPZB, TPM1, FLNA, FHOD3, SGCD, CNN1, ABL1, GADD45A, DNAJB6, MYH10, ARHGAP10, TMOD1	135	436	13528	3.4475	0.149941	0.0780138	0.177089
GOTERM_BP_FAT	GO:0030029~actin filament-based process	11	6.28571	0.000141223	TLN1, FHOD3, ACTN1, CYTH2, CNN1, ABL1, TPM1, CAPZB, FLNA, MYH10, TMOD1	135	241	13528	4.57378	0.193879	0.0693207	0.234875
GOTERM_CC_FAT	GO:0043232~intracellular non-membrane-bounded organelle	41	23.4286	0.00159061	HMGN1, TLN1, TNNC1, VIM, HIRA, PRRX2, TPM2, TPM1, CAPZB, MYL9, VCL, APP, CASP3, ILK, CDC42EP3, PABPN1, ACTB, HIST1H2BC, KIF5B, NOL7, DYNLT3, MYLPF, ACTN1, NEXN, FLNA, C19ORF33, KCTD10, PGM5, SMTN, JUN, FHOD3, SGCD, SLC13A3, MAPRE2, UBB, ABL1, MAP7D1, TBL1X, CACNA1C, TMOD1, MYH10	127	2596	12782	1.58955	0.332581	0.0265958	2.05182
GOTERM_CC_FAT	GO:0043228~non-membrane-bounded organelle	41	23.4286	0.00159061	HMGN1, TLN1, TNNC1, VIM, HIRA, PRRX2, TPM2, TPM1, CAPZB, MYL9, VCL, APP, CASP3, ILK, CDC42EP3, PABPN1, ACTB, HIST1H2BC, KIF5B, NOL7, DYNLT3, MYLPF, ACTN1, NEXN, FLNA, C19ORF33, KCTD10, PGM5, SMTN, JUN, FHOD3, SGCD, SLC13A3, MAPRE2, UBB, ABL1, MAP7D1, TBL1X, CACNA1C, TMOD1, MYH10	127	2596	12782	1.58955	0.332581	0.0265958	2.05182
GOTERM_CC_FAT	GO:0044430~cytoskeletal part	18	10.2857	0.0120971	KIF5B, TNNC1, VIM, DYNLT3, MYLPF, TPM2, CAPZB, TPM1, MYL9, APP, PGM5, ILK, SLC13A3, MAPRE2, TBL1X, MAP7D1, CACNA1C, MYH10	127	952	12782	1.90296	0.954562	0.116317	14.6583
Annotation Cluster 3	Enrichment Score: 3.793722776054254
Category	Term	Count	%	PValue	Genes	List Total	Pop Hits	Pop Total	Fold Enrichment	Bonferroni	Benjamini	FDR
SMART	SM00033:CH	7	4	4.89002e-05	SMTN, TAGLN, ACTN1, MAPRE2, CNN1, EHBP1L1, FLNA	87	70	9079	10.4356	0.00463486	0.00463486	0.0537382
INTERPRO	IPR001715:Calponin-like actin-binding	7	4	5.25874e-05	SMTN, TAGLN, ACTN1, MAPRE2, CNN1, EHBP1L1, FLNA	159	70	16659	10.4774	0.0217937	0.0217937	0.0738191
SP_PIR_KEYWORDS	actin binding	5	2.85714	0.000458492	TAGLN, ACTN1, CNN1, TPM1, FLNA	175	40	19235	13.7393	0.132522	0.0234157	0.613995
UP_SEQ_FEATURE	domain:CH	5	2.85714	0.000567003	SMTN, TAGLN, MAPRE2, CNN1, EHBP1L1	175	42	19113	13.002	0.314974	0.314974	0.846187
Annotation Cluster 4	Enrichment Score: 3.196020959327815
Category	Term	Count	%	PValue	Genes	List Total	Pop Hits	Pop Total	Fold Enrichment	Bonferroni	Benjamini	FDR
KEGG_PATHWAY	hsa04510:Focal adhesion	13	7.42857	5.62625e-06	ACTB, TLN1, PDGFA, ITGA2, ACTN1, MYLPF, FLNA, VCL, MYL9, JUN, ILK, RAP1A, RELN	65	201	5085	5.0597	0.000478118	0.000478118	0.00605296
KEGG_PATHWAY	hsa04810:Regulation of actin cytoskeleton	10	5.71429	0.00132459	ACTB, FGFR3, PDGFA, BAIAP2, MYLPF, ITGA2, ACTN1, MYH10, VCL, MYL9	65	215	5085	3.63864	0.10655	0.0277732	1.41592
KEGG_PATHWAY	hsa04670:Leukocyte transendothelial migration	7	4	0.00344067	ACTB, GNAI2, MYLPF, RAP1A, ACTN1, VCL, MYL9	65	118	5085	4.64081	0.253949	0.0569087	3.64019
KEGG_PATHWAY	hsa04530:Tight junction	7	4	0.0064117	ACTB, GNAI2, CSNK2B, MYLPF, ACTN1, MYH10, MYL9	65	134	5085	4.08668	0.421172	0.0870963	6.68636
Annotation Cluster 5	Enrichment Score: 2.812909093289905
Category	Term	Count	%	PValue	Genes	List Total	Pop Hits	Pop Total	Fold Enrichment	Bonferroni	Benjamini	FDR
GOTERM_CC_FAT	GO:0005924~cell-substrate adherens junction	9	5.14286	9.58935e-06	PTPRC, TLN1, PGM5, ILK, ITGA2, ACTN1, NEXN, TES, VCL	127	106	12782	8.54539	0.00243274	0.000608741	0.0124879
GOTERM_CC_FAT	GO:0030055~cell-substrate junction	9	5.14286	1.43925e-05	PTPRC, TLN1, PGM5, ILK, ITGA2, ACTN1, NEXN, TES, VCL	127	112	12782	8.0876	0.00364904	0.000609101	0.0187423
GOTERM_CC_FAT	GO:0016323~basolateral plasma membrane	11	6.28571	3.18298e-05	EPCAM, PTPRC, TLN1, PGM5, ILK, ITGA2, ACTN1, AQP1, NEXN, TES, VCL	127	203	12782	5.45371	0.00805231	0.00115432	0.0414453
GOTERM_CC_FAT	GO:0005925~focal adhesion	8	4.57143	6.50546e-05	PTPRC, TLN1, PGM5, ILK, ITGA2, ACTN1, TES, VCL	127	102	12782	7.89378	0.0163886	0.00183436	0.0846901
GOTERM_CC_FAT	GO:0005912~adherens junction	9	5.14286	0.000146306	PTPRC, TLN1, PGM5, ILK, ITGA2, ACTN1, NEXN, TES, VCL	127	155	12782	5.84394	0.0364822	0.00370954	0.190372
GOTERM_CC_FAT	GO:0070161~anchoring junction	9	5.14286	0.000298133	PTPRC, TLN1, PGM5, ILK, ITGA2, ACTN1, NEXN, TES, VCL	127	172	12782	5.26634	0.07294	0.00686153	0.387575
GOTERM_BP_FAT	GO:0051270~regulation of cell motion	8	4.57143	0.00308765	ENPP2, PDGFA, ILK, ITGA2, ACTN1, NEXN, TPM1, VCL	135	193	13528	4.15367	0.991076	0.242393	5.01855
GOTERM_CC_FAT	GO:0043034~costamere	3	1.71429	0.00500255	PGM5, ILK, VCL	127	11	12782	27.4488	0.720244	0.0617059	6.32265
GOTERM_CC_FAT	GO:0030054~cell junction	10	5.71429	0.0701161	PTPRC, TLN1, PGM5, ILK, ITGA2, ACTN1, SLC13A3, NEXN, TES, VCL	127	518	12782	1.94297	1	0.409958	61.1997
GOTERM_CC_FAT	GO:0009898~internal side of plasma membrane	7	4	0.0923678	TLN1, PGM5, PACSIN3, ILK, AP3D1, RAB10, VCL	127	316	12782	2.22949	1	0.476808	71.6962
GOTERM_CC_FAT	GO:0005911~cell-cell junction	4	2.28571	0.288525	TLN1, PGM5, ILK, VCL	127	190	12782	2.11886	1	0.735586	98.8126
SP_PIR_KEYWORDS	cell junction	5	2.85714	0.488699	PGM5, ILK, NEXN, TES, VCL	175	399	19235	1.37737	1	0.966925	99.9878
Annotation Cluster 6	Enrichment Score: 2.596189555302163
Category	Term	Count	%	PValue	Genes	List Total	Pop Hits	Pop Total	Fold Enrichment	Bonferroni	Benjamini	FDR
GOTERM_CC_FAT	GO:0001725~stress fiber	4	2.28571	0.00162714	PGM5, ILK, TPM1, MYH10	127	24	12782	16.7743	0.338755	0.0255206	2.09849
GOTERM_CC_FAT	GO:0032432~actin filament bundle	4	2.28571	0.00206041	PGM5, ILK, TPM1, MYH10	127	26	12782	15.4839	0.407785	0.0286853	2.65037
GOTERM_CC_FAT	GO:0042641~actomyosin	4	2.28571	0.0023014	PGM5, ILK, TPM1, MYH10	127	27	12782	14.9105	0.443022	0.030332	2.95608
GOTERM_BP_FAT	GO:0010927~cellular component assembly involved in morphogenesis	4	2.28571	0.00534404	ILK, TPM1, MYH10, TMOD1	135	36	13528	11.1342	0.999719	0.27897	8.53523
Annotation Cluster 7	Enrichment Score: 2.2303152706795477
Category	Term	Count	%	PValue	Genes	List Total	Pop Hits	Pop Total	Fold Enrichment	Bonferroni	Benjamini	FDR
GOTERM_CC_FAT	GO:0042995~cell projection	18	10.2857	0.000478894	ACTB, TLN1, KIF5B, TNFRSF12A, PDGFA, BAIAP2, VIM, ACTN1, ITGA2, NPY1R, AQP1, CAPZB, TPM1, APP, ILK, RELN, CACNA1C, MYH10	127	697	12782	2.59917	0.114558	0.00931544	0.621891
GOTERM_CC_FAT	GO:0030424~axon	8	4.57143	0.000989416	ACTB, APP, ILK, VIM, ITGA2, NPY1R, AQP1, MYH10	127	159	12782	5.06393	0.222317	0.0177994	1.28092
GOTERM_CC_FAT	GO:0043005~neuron projection	11	6.28571	0.00203933	ACTB, APP, KIF5B, ILK, VIM, ITGA2, RELN, NPY1R, AQP1, CACNA1C, MYH10	127	342	12782	3.23714	0.404598	0.0300406	2.62358
GOTERM_CC_FAT	GO:0044463~cell projection part	8	4.57143	0.00844591	APP, KIF5B, ILK, ITGA2, AQP1, CACNA1C, TPM1, MYH10	127	234	12782	3.44088	0.884024	0.0975023	10.4579
GOTERM_CC_FAT	GO:0043679~nerve terminal	3	1.71429	0.0513149	ILK, ITGA2, AQP1	127	37	12782	8.16046	0.999998	0.350546	49.6439
GOTERM_CC_FAT	GO:0033267~axon part	3	1.71429	0.0991089	ILK, ITGA2, AQP1	127	54	12782	5.59143	1	0.484571	74.315
Annotation Cluster 8	Enrichment Score: 2.2259768310059154
Category	Term	Count	%	PValue	Genes	List Total	Pop Hits	Pop Total	Fold Enrichment	Bonferroni	Benjamini	FDR
GOTERM_BP_FAT	GO:0006928~cell motion	15	8.57143	0.00025905	ACTB, TLN1, TNFRSF12A, ENPP2, VIM, ITGA2, CAPZB, TPM1, VCL, SLIT3, APP, VCAN, RELN, UBB, MYH10	135	475	13528	3.16444	0.326563	0.0941127	0.430442
GOTERM_BP_FAT	GO:0030030~cell projection organization	13	7.42857	0.000293398	ACTB, PDGFA, BAIAP2, CAPZB, TPM1, VCL, SLIT3, APP, ILK, VCAN, RELN, UBB, MYH10	135	368	13528	3.53994	0.360962	0.085665	0.487385
GOTERM_BP_FAT	GO:0048812~neuron projection morphogenesis	9	5.14286	0.00126574	ACTB, APP, BAIAP2, ILK, VCAN, RELN, UBB, MYH10, SLIT3	135	213	13528	4.23412	0.855249	0.214624	2.0867
GOTERM_BP_FAT	GO:0000904~cell morphogenesis involved in differentiation	9	5.14286	0.00296012	ACTB, APP, BAIAP2, ILK, VCAN, RELN, UBB, MYH10, SLIT3	135	244	13528	3.69617	0.989153	0.260358	4.81604
GOTERM_BP_FAT	GO:0048858~cell projection morphogenesis	9	5.14286	0.00303505	ACTB, APP, BAIAP2, ILK, VCAN, RELN, UBB, MYH10, SLIT3	135	245	13528	3.68109	0.990328	0.251668	4.93507
GOTERM_BP_FAT	GO:0007409~axonogenesis	8	4.57143	0.00308765	ACTB, APP, BAIAP2, VCAN, RELN, UBB, MYH10, SLIT3	135	193	13528	4.15367	0.991076	0.242393	5.01855
GOTERM_BP_FAT	GO:0031175~neuron projection development	9	5.14286	0.00396083	ACTB, APP, BAIAP2, ILK, VCAN, RELN, UBB, MYH10, SLIT3	135	256	13528	3.52292	0.997657	0.250532	6.39425
GOTERM_BP_FAT	GO:0032990~cell part morphogenesis	9	5.14286	0.00396083	ACTB, APP, BAIAP2, ILK, VCAN, RELN, UBB, MYH10, SLIT3	135	256	13528	3.52292	0.997657	0.250532	6.39425
GOTERM_BP_FAT	GO:0048667~cell morphogenesis involved in neuron differentiation	8	4.57143	0.00477649	ACTB, APP, BAIAP2, VCAN, RELN, UBB, MYH10, SLIT3	135	209	13528	3.83569	0.999329	0.272156	7.66238
GOTERM_BP_FAT	GO:0032989~cellular component morphogenesis	11	6.28571	0.00611777	ACTB, APP, BAIAP2, ILK, VCAN, RELN, UBB, TPM1, MYH10, SLIT3, TMOD1	135	397	13528	2.77653	0.999914	0.284263	9.71267
GOTERM_BP_FAT	GO:0048666~neuron development	9	5.14286	0.0195561	ACTB, APP, BAIAP2, ILK, VCAN, RELN, UBB, MYH10, SLIT3	135	339	13528	2.66037	1	0.512068	28.0237
GOTERM_BP_FAT	GO:0007411~axon guidance	5	2.85714	0.0216993	APP, RELN, UBB, MYH10, SLIT3	135	107	13528	4.68259	1	0.517018	30.599
GOTERM_BP_FAT	GO:0000902~cell morphogenesis	9	5.14286	0.0253007	ACTB, APP, BAIAP2, ILK, VCAN, RELN, UBB, MYH10, SLIT3	135	356	13528	2.53333	1	0.557228	34.7324
GOTERM_BP_FAT	GO:0030182~neuron differentiation	9	5.14286	0.0696228	ACTB, APP, BAIAP2, ILK, VCAN, RELN, UBB, MYH10, SLIT3	135	438	13528	2.05906	1	0.705831	69.927
GOTERM_BP_FAT	GO:0030900~forebrain development	3	1.71429	0.445834	APP, RELN, MYH10	135	152	13528	1.97778	1	0.96443	99.9946
Annotation Cluster 9	Enrichment Score: 2.2120127437470405
Category	Term	Count	%	PValue	Genes	List Total	Pop Hits	Pop Total	Fold Enrichment	Bonferroni	Benjamini	FDR
GOTERM_BP_FAT	GO:0007155~cell adhesion	16	9.14286	0.00392043	PTPRC, COL21A1, TNFRSF12A, IGFBP7, ITGA2, ACTN1, CD151, VCL, EMILIN1, APP, PGM5, ILK, RHOB, VCAN, RELN, ABL1	135	700	13528	2.29046	0.997507	0.258972	6.33102
GOTERM_BP_FAT	GO:0022610~biological adhesion	16	9.14286	0.00397262	PTPRC, COL21A1, TNFRSF12A, IGFBP7, ITGA2, ACTN1, CD151, VCL, EMILIN1, APP, PGM5, ILK, RHOB, VCAN, RELN, ABL1	135	701	13528	2.28719	0.997699	0.241266	6.41269
SP_PIR_KEYWORDS	cell adhesion	10	5.71429	0.014844	APP, PGM5, TNFRSF12A, IGFBP7, RHOB, ITGA2, RELN, ABL1, EMILIN1, VCL	175	422	19235	2.6046	0.990305	0.402575	18.1962
Annotation Cluster 10	Enrichment Score: 2.1181137831086785
Category	Term	Count	%	PValue	Genes	List Total	Pop Hits	Pop Total	Fold Enrichment	Bonferroni	Benjamini	FDR
GOTERM_CC_FAT	GO:0005925~focal adhesion	8	4.57143	6.50546e-05	PTPRC, TLN1, PGM5, ILK, ITGA2, ACTN1, TES, VCL	127	102	12782	7.89378	0.0163886	0.00183436	0.0846901
GOTERM_BP_FAT	GO:0034329~cell junction assembly	3	1.71429	0.0621471	TLN1, ACTN1, VCL	135	41	13528	7.33225	1	0.679703	65.6406
GOTERM_BP_FAT	GO:0034330~cell junction organization	3	1.71429	0.109385	TLN1, ACTN1, VCL	135	57	13528	5.27407	1	0.767988	85.4675
Annotation Cluster 11	Enrichment Score: 1.8432081022512976
Category	Term	Count	%	PValue	Genes	List Total	Pop Hits	Pop Total	Fold Enrichment	Bonferroni	Benjamini	FDR
SP_PIR_KEYWORDS	muscle protein	6	3.42857	0.000208877	TAGLN, TNNC1, MYLPF, TPM2, TPM1, MYL9	175	60	19235	10.9914	0.0627064	0.0128682	0.280154
GOTERM_CC_FAT	GO:0030017~sarcomere	7	4	0.000408879	PGM5, TNNC1, ACTN1, TPM2, CACNA1C, TPM1, ENO1	127	98	12782	7.18898	0.0986633	0.00861901	0.531192
KEGG_PATHWAY	hsa05410:Hypertrophic cardiomyopathy (HCM)	7	4	0.000630614	ACTB, TNNC1, SGCD, ITGA2, TPM2, CACNA1C, TPM1	65	85	5085	6.44253	0.0522069	0.0264533	0.676376
KEGG_PATHWAY	hsa05414:Dilated cardiomyopathy	7	4	0.000960056	ACTB, TNNC1, SGCD, ITGA2, TPM2, CACNA1C, TPM1	65	92	5085	5.95234	0.0784	0.0268477	1.02807
GOTERM_BP_FAT	GO:0006937~regulation of muscle contraction	5	2.85714	0.00563014	TNNC1, ITGA2, CNN1, TPM1, MYL9	135	72	13528	6.95885	0.999819	0.282067	8.97228
GOTERM_CC_FAT	GO:0005865~striated muscle thin filament	3	1.71429	0.00930755	TNNC1, TPM2, TPM1	127	15	12782	20.1291	0.907003	0.0981157	11.466
SP_PIR_KEYWORDS	Cardiomyopathy	4	2.28571	0.00933903	TNNC1, SGCD, TPM1, VCL	175	48	19235	9.15952	0.945454	0.304822	11.8395
GOTERM_BP_FAT	GO:0043462~regulation of ATPase activity	3	1.71429	0.0106712	TNNC1, TPM2, TPM1	135	16	13528	18.7889	1	0.410289	16.3585
KEGG_PATHWAY	hsa05412:Arrhythmogenic right ventricular cardiomyopathy (ARVC)	5	2.85714	0.0148854	ACTB, SGCD, ITGA2, ACTN1, CACNA1C	65	76	5085	5.14676	0.720504	0.147299	14.9007
KEGG_PATHWAY	hsa04260:Cardiac muscle contraction	5	2.85714	0.0162447	ATP1B3, TNNC1, TPM2, CACNA1C, TPM1	65	78	5085	5.01479	0.751456	0.129958	16.1556
GOTERM_BP_FAT	GO:0006936~muscle contraction	5	2.85714	0.0655849	PABPN1, SMTN, TNNC1, CACNA1C, TPM1	135	153	13528	3.27475	1	0.695728	67.6785
GOTERM_BP_FAT	GO:0003012~muscle system process	5	2.85714	0.0857029	PABPN1, SMTN, TNNC1, CACNA1C, TPM1	135	168	13528	2.98236	1	0.721362	77.5039
GOTERM_BP_FAT	GO:0008217~regulation of blood pressure	3	1.71429	0.260712	NPY1R, CACNA1C, TPM1	135	100	13528	3.00622	1	0.894449	99.3457
GOTERM_BP_FAT	GO:0008015~blood circulation	4	2.28571	0.280225	TNNC1, NPY1R, CACNA1C, TPM1	135	186	13528	2.155	1	0.902024	99.5809
GOTERM_BP_FAT	GO:0003013~circulatory system process	4	2.28571	0.280225	TNNC1, NPY1R, CACNA1C, TPM1	135	186	13528	2.155	1	0.902024	99.5809
GOTERM_BP_FAT	GO:0051336~regulation of hydrolase activity	5	2.85714	0.429347	TNNC1, ITGA2, TPM2, TPM1, DNAJB6	135	337	13528	1.48676	1	0.959974	99.9912
Annotation Cluster 12	Enrichment Score: 1.833930454937406
Category	Term	Count	%	PValue	Genes	List Total	Pop Hits	Pop Total	Fold Enrichment	Bonferroni	Benjamini	FDR
GOTERM_CC_FAT	GO:0030017~sarcomere	7	4	0.000408879	PGM5, TNNC1, ACTN1, TPM2, CACNA1C, TPM1, ENO1	127	98	12782	7.18898	0.0986633	0.00861901	0.531192
GOTERM_CC_FAT	GO:0030018~Z disc	3	1.71429	0.075356	PGM5, ACTN1, CACNA1C	127	46	12782	6.56385	1	0.42465	63.9526
GOTERM_CC_FAT	GO:0031674~I band	3	1.71429	0.102211	PGM5, ACTN1, CACNA1C	127	55	12782	5.48976	1	0.487245	75.4432
Annotation Cluster 13	Enrichment Score: 1.7371859554918498
Category	Term	Count	%	PValue	Genes	List Total	Pop Hits	Pop Total	Fold Enrichment	Bonferroni	Benjamini	FDR
GOTERM_BP_FAT	GO:0043086~negative regulation of catalytic activity	10	5.71429	0.00174441	PTPRC, CASP3, GNAI2, ILK, PSME3, UBB, NPY1R, GADD45A, FLNA, DNAJB6	135	277	13528	3.6176	0.930351	0.23389	2.86511
GOTERM_BP_FAT	GO:0044092~negative regulation of molecular function	11	6.28571	0.00179408	PTPRC, CASP3, GNAI2, ILK, PRDX2, PSME3, UBB, NPY1R, GADD45A, FLNA, DNAJB6	135	334	13528	3.30024	0.935444	0.220507	2.94556
GOTERM_BP_FAT	GO:0045859~regulation of protein kinase activity	9	5.14286	0.0214644	PTPRC, APP, CASP3, GNAI2, ILK, PRDX2, RELN, GADD45A, VLDLR	135	345	13528	2.61411	1	0.528827	30.321
GOTERM_BP_FAT	GO:0043549~regulation of kinase activity	9	5.14286	0.0256718	PTPRC, APP, CASP3, GNAI2, ILK, PRDX2, RELN, GADD45A, VLDLR	135	357	13528	2.52624	1	0.555112	35.1449
GOTERM_BP_FAT	GO:0051338~regulation of transferase activity	9	5.14286	0.0317037	PTPRC, APP, CASP3, GNAI2, ILK, PRDX2, RELN, GADD45A, VLDLR	135	372	13528	2.42437	1	0.565377	41.5157
GOTERM_BP_FAT	GO:0006469~negative regulation of protein kinase activity	4	2.28571	0.055242	PTPRC, CASP3, ILK, GADD45A	135	87	13528	4.60724	1	0.67102	61.1769
GOTERM_BP_FAT	GO:0033673~negative regulation of kinase activity	4	2.28571	0.0599554	PTPRC, CASP3, ILK, GADD45A	135	90	13528	4.45366	1	0.670439	64.2789
GOTERM_BP_FAT	GO:0051348~negative regulation of transferase activity	4	2.28571	0.0699262	PTPRC, CASP3, ILK, GADD45A	135	96	13528	4.17531	1	0.699531	70.0899
Annotation Cluster 14	Enrichment Score: 1.7247299173902757
Category	Term	Count	%	PValue	Genes	List Total	Pop Hits	Pop Total	Fold Enrichment	Bonferroni	Benjamini	FDR
SP_PIR_KEYWORDS	muscle protein	6	3.42857	0.000208877	TAGLN, TNNC1, MYLPF, TPM2, TPM1, MYL9	175	60	19235	10.9914	0.0627064	0.0128682	0.280154
GOTERM_BP_FAT	GO:0007517~muscle organ development	8	4.57143	0.00502863	APP, SMTN, TAGLN, TNNC1, MYLPF, SGCD, TPM1, MYH10	135	211	13528	3.79933	0.999544	0.274246	8.05112
GOTERM_BP_FAT	GO:0014706~striated muscle tissue development	5	2.85714	0.0305264	APP, TNNC1, MYLPF, TPM1, MYH10	135	119	13528	4.2104	1	0.563944	40.3204
GOTERM_BP_FAT	GO:0060537~muscle tissue development	5	2.85714	0.0356283	APP, TNNC1, MYLPF, TPM1, MYH10	135	125	13528	4.0083	1	0.596491	45.3397
GOTERM_BP_FAT	GO:0048738~cardiac muscle tissue development	3	1.71429	0.109385	TNNC1, TPM1, MYH10	135	57	13528	5.27407	1	0.767988	85.4675
GOTERM_BP_FAT	GO:0007507~heart development	4	2.28571	0.358798	CASP3, TNNC1, TPM1, MYH10	135	215	13528	1.86432	1	0.937215	99.9388
Annotation Cluster 15	Enrichment Score: 1.714323516982958
Category	Term	Count	%	PValue	Genes	List Total	Pop Hits	Pop Total	Fold Enrichment	Bonferroni	Benjamini	FDR
GOTERM_BP_FAT	GO:0031032~actomyosin structure organization	4	2.28571	0.00259732	CNN1, TPM1, MYH10, TMOD1	135	28	13528	14.3153	0.981101	0.263085	4.23773
GOTERM_BP_FAT	GO:0010927~cellular component assembly involved in morphogenesis	4	2.28571	0.00534404	ILK, TPM1, MYH10, TMOD1	135	36	13528	11.1342	0.999719	0.27897	8.53523
GOTERM_BP_FAT	GO:0030705~cytoskeleton-dependent intracellular transport	4	2.28571	0.0147511	APP, KIF5B, TPM1, MYH10	135	52	13528	7.70826	1	0.45823	21.9198
GOTERM_BP_FAT	GO:0055002~striated muscle cell development	4	2.28571	0.0147511	APP, TPM1, MYH10, TMOD1	135	52	13528	7.70826	1	0.45823	21.9198
GOTERM_BP_FAT	GO:0055001~muscle cell development	4	2.28571	0.0179824	APP, TPM1, MYH10, TMOD1	135	56	13528	7.15767	1	0.508368	26.0759
GOTERM_BP_FAT	GO:0030239~myofibril assembly	3	1.71429	0.0180824	TPM1, MYH10, TMOD1	135	21	13528	14.3153	1	0.492965	26.201
GOTERM_BP_FAT	GO:0014706~striated muscle tissue development	5	2.85714	0.0305264	APP, TNNC1, MYLPF, TPM1, MYH10	135	119	13528	4.2104	1	0.563944	40.3204
GOTERM_BP_FAT	GO:0060537~muscle tissue development	5	2.85714	0.0356283	APP, TNNC1, MYLPF, TPM1, MYH10	135	125	13528	4.0083	1	0.596491	45.3397
GOTERM_BP_FAT	GO:0051146~striated muscle cell differentiation	4	2.28571	0.0567926	APP, TPM1, MYH10, TMOD1	135	88	13528	4.55488	1	0.676778	62.2243
GOTERM_BP_FAT	GO:0042692~muscle cell differentiation	4	2.28571	0.118538	APP, TPM1, MYH10, TMOD1	135	121	13528	3.31264	1	0.77781	87.7638
Annotation Cluster 16	Enrichment Score: 1.6917288878668826
Category	Term	Count	%	PValue	Genes	List Total	Pop Hits	Pop Total	Fold Enrichment	Bonferroni	Benjamini	FDR
GOTERM_BP_FAT	GO:0010035~response to inorganic substance	9	5.14286	0.000989978	CUTA, ACTB, PDGFA, TNNC1, JUN, SERPINE1, PRDX2, TPM1, KCNMB1	135	205	13528	4.39935	0.779411	0.222685	1.6356
GOTERM_BP_FAT	GO:0000302~response to reactive oxygen species	4	2.28571	0.0382888	JUN, SERPINE1, PRDX2, TPM1	135	75	13528	5.3444	1	0.617457	47.797
GOTERM_BP_FAT	GO:0006979~response to oxidative stress	4	2.28571	0.221879	JUN, SERPINE1, PRDX2, TPM1	135	164	13528	2.44408	1	0.868081	98.4656
Annotation Cluster 17	Enrichment Score: 1.6890379226220844
Category	Term	Count	%	PValue	Genes	List Total	Pop Hits	Pop Total	Fold Enrichment	Bonferroni	Benjamini	FDR
GOTERM_BP_FAT	GO:0051270~regulation of cell motion	8	4.57143	0.00308765	ENPP2, PDGFA, ILK, ITGA2, ACTN1, NEXN, TPM1, VCL	135	193	13528	4.15367	0.991076	0.242393	5.01855
GOTERM_BP_FAT	GO:0030334~regulation of cell migration	7	4	0.00670672	ENPP2, PDGFA, ILK, ITGA2, NEXN, TPM1, VCL	135	169	13528	4.1506	0.999965	0.298196	10.5994
GOTERM_BP_FAT	GO:0040012~regulation of locomotion	7	4	0.0121411	ENPP2, PDGFA, ILK, ITGA2, NEXN, TPM1, VCL	135	192	13528	3.6534	1	0.431566	18.4036
GOTERM_BP_FAT	GO:0032970~regulation of actin filament-based process	5	2.85714	0.0131487	PDGFA, TNNC1, ILK, TPM1, CAPZB	135	92	13528	5.44605	1	0.447919	19.7784
GOTERM_BP_FAT	GO:0051493~regulation of cytoskeleton organization	5	2.85714	0.0461716	PDGFA, ILK, NEXN, TPM1, CAPZB	135	136	13528	3.6841	1	0.643178	54.4822
GOTERM_BP_FAT	GO:0032956~regulation of actin cytoskeleton organization	4	2.28571	0.0583638	PDGFA, ILK, TPM1, CAPZB	135	89	13528	4.5037	1	0.673433	63.2585
GOTERM_BP_FAT	GO:0033043~regulation of organelle organization	5	2.85714	0.16863	PDGFA, ILK, NEXN, TPM1, CAPZB	135	217	13528	2.30893	1	0.824417	95.3806
Annotation Cluster 18	Enrichment Score: 1.6321227855064142
Category	Term	Count	%	PValue	Genes	List Total	Pop Hits	Pop Total	Fold Enrichment	Bonferroni	Benjamini	FDR
GOTERM_MF_FAT	GO:0019899~enzyme binding	13	7.42857	0.00620967	ACTB, CUTA, PTPRC, VIM, PRKCDBP, PFKM, UBE2L3, FLNA, IGF2R, SERPINE1, RAP1A, SYTL2, CACNA1C	131	523	12983	2.46346	0.912451	0.33364	8.29517
GOTERM_MF_FAT	GO:0019900~kinase binding	6	3.42857	0.033978	ACTB, PTPRC, VIM, PRKCDBP, PFKM, FLNA	131	179	12983	3.32202	0.999999	0.707344	38.1568
GOTERM_MF_FAT	GO:0019901~protein kinase binding	5	2.85714	0.060168	ACTB, PTPRC, VIM, PRKCDBP, FLNA	131	147	12983	3.37098	1	0.760031	57.7965
Annotation Cluster 19	Enrichment Score: 1.4683274397247443
Category	Term	Count	%	PValue	Genes	List Total	Pop Hits	Pop Total	Fold Enrichment	Bonferroni	Benjamini	FDR
GOTERM_BP_FAT	GO:0009991~response to extracellular stimulus	9	5.14286	0.0015544	BCKDHA, GNAI2, PDGFA, SFRP2, IGFBP7, JUN, CSNK2B, ITGA2, VLDLR	135	220	13528	4.09939	0.90688	0.231844	2.55682
GOTERM_BP_FAT	GO:0007584~response to nutrient	7	4	0.00268159	BCKDHA, GNAI2, PDGFA, IGFBP7, CSNK2B, ITGA2, VLDLR	135	140	13528	5.01037	0.983387	0.253743	4.37234
GOTERM_BP_FAT	GO:0031667~response to nutrient levels	8	4.57143	0.00345841	BCKDHA, GNAI2, PDGFA, IGFBP7, JUN, CSNK2B, ITGA2, VLDLR	135	197	13528	4.06934	0.994942	0.254503	5.605
GOTERM_BP_FAT	GO:0010033~response to organic substance	14	8	0.0265102	BCKDHA, MCL1, PDGFA, IGFBP7, BAIAP2, CSNK2B, ITGA2, PRDX2, NPY1R, AQP1, CASP3, JUN, DNAJB6, VLDLR	135	721	13528	1.94577	1	0.559573	36.0679
GOTERM_BP_FAT	GO:0009725~response to hormone stimulus	8	4.57143	0.0724802	BCKDHA, PDGFA, IGFBP7, BAIAP2, ITGA2, NPY1R, AQP1, VLDLR	135	367	13528	2.18436	1	0.705203	71.4284
GOTERM_BP_FAT	GO:0009719~response to endogenous stimulus	8	4.57143	0.107665	BCKDHA, PDGFA, IGFBP7, BAIAP2, ITGA2, NPY1R, AQP1, VLDLR	135	405	13528	1.97941	1	0.7708	84.9931
GOTERM_BP_FAT	GO:0048545~response to steroid hormone stimulus	5	2.85714	0.123311	BCKDHA, PDGFA, IGFBP7, NPY1R, AQP1	135	192	13528	2.60957	1	0.784119	88.8215
GOTERM_BP_FAT	GO:0033273~response to vitamin	3	1.71429	0.13901	PDGFA, IGFBP7, ITGA2	135	66	13528	4.55488	1	0.799803	91.7259
GOTERM_BP_FAT	GO:0032870~cellular response to hormone stimulus	4	2.28571	0.145342	IGFBP7, BAIAP2, ITGA2, VLDLR	135	133	13528	3.01376	1	0.801974	92.6828
GOTERM_BP_FAT	GO:0043627~response to estrogen stimulus	3	1.71429	0.279089	PDGFA, NPY1R, AQP1	135	105	13528	2.86307	1	0.901985	99.5697
Annotation Cluster 20	Enrichment Score: 1.4279369722563848
Category	Term	Count	%	PValue	Genes	List Total	Pop Hits	Pop Total	Fold Enrichment	Bonferroni	Benjamini	FDR
GOTERM_BP_FAT	GO:0030334~regulation of cell migration	7	4	0.00670672	ENPP2, PDGFA, ILK, ITGA2, NEXN, TPM1, VCL	135	169	13528	4.1506	0.999965	0.298196	10.5994
GOTERM_BP_FAT	GO:0040012~regulation of locomotion	7	4	0.0121411	ENPP2, PDGFA, ILK, ITGA2, NEXN, TPM1, VCL	135	192	13528	3.6534	1	0.431566	18.4036
GOTERM_BP_FAT	GO:0045785~positive regulation of cell adhesion	4	2.28571	0.0215767	ILK, ITGA2, TPM1, EMILIN1	135	60	13528	6.68049	1	0.522742	30.454
GOTERM_BP_FAT	GO:0030155~regulation of cell adhesion	4	2.28571	0.154663	ILK, ITGA2, TPM1, EMILIN1	135	137	13528	2.92576	1	0.810795	93.9038
GOTERM_BP_FAT	GO:0051130~positive regulation of cellular component organization	4	2.28571	0.266794	TNFRSF12A, ILK, ITGA2, TPM1	135	181	13528	2.21453	1	0.897381	99.4298
Annotation Cluster 21	Enrichment Score: 1.4248178538823169
Category	Term	Count	%	PValue	Genes	List Total	Pop Hits	Pop Total	Fold Enrichment	Bonferroni	Benjamini	FDR
GOTERM_BP_FAT	GO:0006006~glucose metabolic process	6	3.42857	0.0180564	ATF4, PGM5, NPY1R, PFKM, GYG1, ENO1	135	153	13528	3.9297	1	0.500998	26.1685
GOTERM_BP_FAT	GO:0019318~hexose metabolic process	6	3.42857	0.0421715	ATF4, PGM5, NPY1R, PFKM, GYG1, ENO1	135	192	13528	3.13148	1	0.625193	51.1974
GOTERM_BP_FAT	GO:0005996~monosaccharide metabolic process	6	3.42857	0.0698067	ATF4, PGM5, NPY1R, PFKM, GYG1, ENO1	135	222	13528	2.70831	1	0.702835	70.0258
Annotation Cluster 22	Enrichment Score: 1.415319550352468
Category	Term	Count	%	PValue	Genes	List Total	Pop Hits	Pop Total	Fold Enrichment	Bonferroni	Benjamini	FDR
GOTERM_BP_FAT	GO:0051270~regulation of cell motion	8	4.57143	0.00308765	ENPP2, PDGFA, ILK, ITGA2, ACTN1, NEXN, TPM1, VCL	135	193	13528	4.15367	0.991076	0.242393	5.01855
GOTERM_BP_FAT	GO:0014910~regulation of smooth muscle cell migration	3	1.71429	0.00602304	PDGFA, ILK, ITGA2	135	12	13528	25.0519	0.999901	0.289256	9.56929
GOTERM_BP_FAT	GO:0030334~regulation of cell migration	7	4	0.00670672	ENPP2, PDGFA, ILK, ITGA2, NEXN, TPM1, VCL	135	169	13528	4.1506	0.999965	0.298196	10.5994
GOTERM_BP_FAT	GO:0040012~regulation of locomotion	7	4	0.0121411	ENPP2, PDGFA, ILK, ITGA2, NEXN, TPM1, VCL	135	192	13528	3.6534	1	0.431566	18.4036
GOTERM_BP_FAT	GO:0051271~negative regulation of cell motion	4	2.28571	0.0245114	ILK, ACTN1, TPM1, VCL	135	63	13528	6.36238	1	0.553249	33.8468
GOTERM_BP_FAT	GO:0030336~negative regulation of cell migration	3	1.71429	0.109385	ILK, TPM1, VCL	135	57	13528	5.27407	1	0.767988	85.4675
GOTERM_BP_FAT	GO:0040013~negative regulation of locomotion	3	1.71429	0.122335	ILK, TPM1, VCL	135	61	13528	4.92823	1	0.783844	88.6125
GOTERM_BP_FAT	GO:0030335~positive regulation of cell migration	3	1.71429	0.220408	PDGFA, ILK, ITGA2	135	89	13528	3.37778	1	0.867479	98.4166
GOTERM_BP_FAT	GO:0051272~positive regulation of cell motion	3	1.71429	0.253363	PDGFA, ILK, ITGA2	135	98	13528	3.06757	1	0.889995	99.2286
GOTERM_BP_FAT	GO:0040017~positive regulation of locomotion	3	1.71429	0.253363	PDGFA, ILK, ITGA2	135	98	13528	3.06757	1	0.889995	99.2286
Annotation Cluster 23	Enrichment Score: 1.4118816479776475
Category	Term	Count	%	PValue	Genes	List Total	Pop Hits	Pop Total	Fold Enrichment	Bonferroni	Benjamini	FDR
UP_SEQ_FEATURE	domain:EF-hand 3	5	2.85714	0.0107243	CALML4, TNNC1, MYLPF, CIB2, MYL9	175	94	19113	5.80942	0.999247	0.909032	14.9177
SMART	SM00054:EFh	6	3.42857	0.0113495	CALML4, TNNC1, MYLPF, ACTN1, CIB2, MYL9	87	143	9079	4.37859	0.661885	0.418523	11.7916
INTERPRO	IPR002048:Calcium-binding EF-hand	6	3.42857	0.0117398	CALML4, TNNC1, MYLPF, ACTN1, CIB2, MYL9	159	143	16659	4.39609	0.992903	0.915755	15.2808
UP_SEQ_FEATURE	domain:EF-hand 1	6	3.42857	0.0256385	CALML4, TNNC1, MYLPF, ACTN1, CIB2, MYL9	175	182	19113	3.60057	1	0.944274	32.237
UP_SEQ_FEATURE	domain:EF-hand 2	6	3.42857	0.0256385	CALML4, TNNC1, MYLPF, ACTN1, CIB2, MYL9	175	182	19113	3.60057	1	0.944274	32.237
COG_ONTOLOGY	Signal transduction mechanisms / Cytoskeleton / Cell division and chromosome partitioning / General function prediction only	3	1.71429	0.0272546	MYLPF, CIB2, MYL9	13	43	1950	10.4651	0.175873	0.175873	13.2775
PIR_SUPERFAMILY	PIRSF002350:calmodulin	3	1.71429	0.0319275	CALML4, CIB2, MYL9	88	24	7396	10.5057	0.971825	0.971825	30.6919
INTERPRO	IPR018248:EF hand	5	2.85714	0.035309	TNNC1, MYLPF, ACTN1, CIB2, MYL9	159	130	16659	4.02975	1	0.9934	39.6363
INTERPRO	IPR018249:EF-HAND 2	6	3.42857	0.0542831	CALML4, TNNC1, MYLPF, ACTN1, CIB2, MYL9	159	215	16659	2.92391	1	0.997109	54.3298
INTERPRO	IPR011992:EF-Hand type	6	3.42857	0.074366	CALML4, TNNC1, MYLPF, ACTN1, CIB2, MYL9	159	236	16659	2.66374	1	0.995467	66.2143
GOTERM_MF_FAT	GO:0005509~calcium ion binding	14	8	0.130257	CRELD2, TNNC1, MYLPF, ACTN1, ITGA2, SLIT3, MYL9, CALML4, VCAN, RELN, AOC2, CACNA1C, CIB2, VLDLR	131	919	12983	1.50979	1	0.877388	85.6312
INTERPRO	IPR018247:EF-HAND 1	5	2.85714	0.151518	TNNC1, MYLPF, ACTN1, CIB2, MYL9	159	217	16659	2.41414	1	0.998976	90.0464
SP_PIR_KEYWORDS	calcium	11	6.28571	0.192288	CRELD2, TNNC1, MYLPF, ITGA2, ACTN1, VCAN, RELN, CIB2, AOC2, CACNA1C, MYL9	175	803	19235	1.50568	1	0.865484	94.3184
Annotation Cluster 24	Enrichment Score: 1.3956712647522167
Category	Term	Count	%	PValue	Genes	List Total	Pop Hits	Pop Total	Fold Enrichment	Bonferroni	Benjamini	FDR
GOTERM_BP_FAT	GO:0007584~response to nutrient	7	4	0.00268159	BCKDHA, GNAI2, PDGFA, IGFBP7, CSNK2B, ITGA2, VLDLR	135	140	13528	5.01037	0.983387	0.253743	4.37234
GOTERM_BP_FAT	GO:0001666~response to hypoxia	4	2.28571	0.147659	PDGFA, ITGA2, KCNA5, VLDLR	135	134	13528	2.99127	1	0.803164	93.0062
GOTERM_BP_FAT	GO:0070482~response to oxygen levels	4	2.28571	0.164185	PDGFA, ITGA2, KCNA5, VLDLR	135	141	13528	2.84276	1	0.821164	94.9517
Annotation Cluster 25	Enrichment Score: 1.330533703539624
Category	Term	Count	%	PValue	Genes	List Total	Pop Hits	Pop Total	Fold Enrichment	Bonferroni	Benjamini	FDR
GOTERM_CC_FAT	GO:0043005~neuron projection	11	6.28571	0.00203933	ACTB, APP, KIF5B, ILK, VIM, ITGA2, RELN, NPY1R, AQP1, CACNA1C, MYH10	127	342	12782	3.23714	0.404598	0.0300406	2.62358
GOTERM_CC_FAT	GO:0030425~dendrite	4	2.28571	0.217212	ILK, RELN, CACNA1C, MYH10	127	163	12782	2.46983	1	0.664213	95.8801
GOTERM_CC_FAT	GO:0043025~cell soma	4	2.28571	0.230159	ILK, AQP1, CACNA1C, MYH10	127	168	12782	2.39633	1	0.681936	96.6845
Annotation Cluster 26	Enrichment Score: 1.3139783156143745
Category	Term	Count	%	PValue	Genes	List Total	Pop Hits	Pop Total	Fold Enrichment	Bonferroni	Benjamini	FDR
UP_SEQ_FEATURE	metal ion-binding site:Copper	3	1.71429	0.00800423	APP, AOC2, LOXL1	175	15	19113	21.8434	0.995301	0.931447	11.3444
SP_PIR_KEYWORDS	copper	3	1.71429	0.0940696	APP, AOC2, LOXL1	175	57	19235	5.78496	1	0.69208	73.4667
GOTERM_MF_FAT	GO:0005507~copper ion binding	3	1.71429	0.151809	APP, AOC2, LOXL1	131	69	12983	4.30899	1	0.88304	89.8625
Annotation Cluster 27	Enrichment Score: 1.2869152687790377
Category	Term	Count	%	PValue	Genes	List Total	Pop Hits	Pop Total	Fold Enrichment	Bonferroni	Benjamini	FDR
GOTERM_BP_FAT	GO:0019220~regulation of phosphate metabolic process	14	8	0.00104646	PTPRC, GNAI2, PDGFA, ITGA2, PRDX2, APP, CASP3, JUN, ILK, RELN, PPP1R14C, GADD45A, PPP1R14A, VLDLR	135	485	13528	2.89258	0.797645	0.204073	1.72815
GOTERM_BP_FAT	GO:0051174~regulation of phosphorus metabolic process	14	8	0.00104646	PTPRC, GNAI2, PDGFA, ITGA2, PRDX2, APP, CASP3, JUN, ILK, RELN, PPP1R14C, GADD45A, PPP1R14A, VLDLR	135	485	13528	2.89258	0.797645	0.204073	1.72815
GOTERM_BP_FAT	GO:0042325~regulation of phosphorylation	13	7.42857	0.00228096	PTPRC, GNAI2, PDGFA, PRDX2, APP, CASP3, JUN, ILK, RELN, PPP1R14C, GADD45A, PPP1R14A, VLDLR	135	466	13528	2.79549	0.969338	0.252031	3.73075
GOTERM_BP_FAT	GO:0045859~regulation of protein kinase activity	9	5.14286	0.0214644	PTPRC, APP, CASP3, GNAI2, ILK, PRDX2, RELN, GADD45A, VLDLR	135	345	13528	2.61411	1	0.528827	30.321
GOTERM_BP_FAT	GO:0043549~regulation of kinase activity	9	5.14286	0.0256718	PTPRC, APP, CASP3, GNAI2, ILK, PRDX2, RELN, GADD45A, VLDLR	135	357	13528	2.52624	1	0.555112	35.1449
GOTERM_BP_FAT	GO:0051338~regulation of transferase activity	9	5.14286	0.0317037	PTPRC, APP, CASP3, GNAI2, ILK, PRDX2, RELN, GADD45A, VLDLR	135	372	13528	2.42437	1	0.565377	41.5157
GOTERM_BP_FAT	GO:0043085~positive regulation of catalytic activity	11	6.28571	0.0338548	PTPRC, GNAI2, ILK, ITGA2, PRDX2, RELN, PSME3, UBB, ABL1, TPM1, VLDLR	135	520	13528	2.11977	1	0.583536	43.6418
GOTERM_BP_FAT	GO:0044093~positive regulation of molecular function	11	6.28571	0.0657747	PTPRC, GNAI2, ILK, ITGA2, PRDX2, RELN, PSME3, UBB, ABL1, TPM1, VLDLR	135	586	13528	1.88103	1	0.69267	67.7876
GOTERM_BP_FAT	GO:0045860~positive regulation of protein kinase activity	6	3.42857	0.070867	PTPRC, GNAI2, ILK, PRDX2, RELN, VLDLR	135	223	13528	2.69616	1	0.700634	70.5896
GOTERM_BP_FAT	GO:0033674~positive regulation of kinase activity	6	3.42857	0.0796683	PTPRC, GNAI2, ILK, PRDX2, RELN, VLDLR	135	231	13528	2.60279	1	0.714741	74.8998
GOTERM_BP_FAT	GO:0051347~positive regulation of transferase activity	6	3.42857	0.0902394	PTPRC, GNAI2, ILK, PRDX2, RELN, VLDLR	135	240	13528	2.50519	1	0.73394	79.2919
GOTERM_BP_FAT	GO:0006468~protein amino acid phosphorylation	11	6.28571	0.125451	PTPRC, APP, FGFR3, GNAI2, ILK, PINK1, PRDX2, DYRK3, RELN, STK17A, ABL1	135	667	13528	1.6526	1	0.787681	89.2672
GOTERM_BP_FAT	GO:0043406~positive regulation of MAP kinase activity	3	1.71429	0.268063	PTPRC, ILK, PRDX2	135	102	13528	2.94728	1	0.897562	99.446
GOTERM_BP_FAT	GO:0016310~phosphorylation	11	6.28571	0.269191	PTPRC, APP, FGFR3, GNAI2, ILK, PINK1, PRDX2, DYRK3, RELN, STK17A, ABL1	135	800	13528	1.37785	1	0.897598	99.4601
GOTERM_BP_FAT	GO:0000165~MAPKKK cascade	4	2.28571	0.274844	PTPRC, FGFR3, GNAI2, PRDX2	135	184	13528	2.17842	1	0.89998	99.5255
GOTERM_BP_FAT	GO:0007243~protein kinase cascade	6	3.42857	0.304764	PTPRC, FGFR3, GNAI2, PINK1, PRDX2, STK17A	135	370	13528	1.62498	1	0.917806	99.7648
GOTERM_BP_FAT	GO:0043405~regulation of MAP kinase activity	3	1.71429	0.408398	PTPRC, ILK, PRDX2	135	141	13528	2.13207	1	0.952989	99.984
GOTERM_BP_FAT	GO:0010648~negative regulation of cell communication	4	2.28571	0.44665	PTPRC, GNAI2, RGS5, PRDX2	135	248	13528	1.61625	1	0.964286	99.9947
Annotation Cluster 28	Enrichment Score: 1.237912953131951
Category	Term	Count	%	PValue	Genes	List Total	Pop Hits	Pop Total	Fold Enrichment	Bonferroni	Benjamini	FDR
SP_PIR_KEYWORDS	palmitate	6	3.42857	0.0441795	GNAI2, RHOB, NPY1R, KCNA5, CD151, VCL	175	213	19235	3.09618	0.999999	0.583331	45.4923
GOTERM_BP_FAT	GO:0051051~negative regulation of transport	5	2.85714	0.0451665	GNAI2, PACSIN3, NPY1R, KCNA5, FLNA	135	135	13528	3.71139	1	0.645552	53.6769
SP_PIR_KEYWORDS	lipoprotein	11	6.28571	0.0670576	GNAI2, CHMP6, RHOB, RAP1A, NPY1R, KCNA5, ABL1, RAB10, CD151, VLDLR, VCL	175	642	19235	1.88327	1	0.641078	60.6309
UP_SEQ_FEATURE	lipid moiety-binding region:S-palmitoyl cysteine	5	2.85714	0.0835338	GNAI2, RHOB, NPY1R, KCNA5, CD151	175	181	19113	3.01705	1	0.999306	72.9364
Annotation Cluster 29	Enrichment Score: 1.1965221941582782
Category	Term	Count	%	PValue	Genes	List Total	Pop Hits	Pop Total	Fold Enrichment	Bonferroni	Benjamini	FDR
GOTERM_BP_FAT	GO:0045580~regulation of T cell differentiation	4	2.28571	0.0139995	PTPRC, AP3D1, PRDX2, ZEB1	135	51	13528	7.8594	1	0.449879	20.9222
GOTERM_BP_FAT	GO:0045619~regulation of lymphocyte differentiation	4	2.28571	0.0245114	PTPRC, AP3D1, PRDX2, ZEB1	135	63	13528	6.36238	1	0.553249	33.8468
GOTERM_BP_FAT	GO:0050863~regulation of T cell activation	5	2.85714	0.0289285	PTPRC, CASP3, AP3D1, PRDX2, ZEB1	135	117	13528	4.28237	1	0.577457	38.6614
GOTERM_BP_FAT	GO:0050865~regulation of cell activation	6	3.42857	0.030075	PTPRC, CASP3, PDGFA, AP3D1, PRDX2, ZEB1	135	175	13528	3.43568	1	0.571408	39.8561
GOTERM_BP_FAT	GO:0051249~regulation of lymphocyte activation	5	2.85714	0.0594981	PTPRC, CASP3, AP3D1, PRDX2, ZEB1	135	148	13528	3.38539	1	0.671879	63.9885
GOTERM_BP_FAT	GO:0002694~regulation of leukocyte activation	5	2.85714	0.0828632	PTPRC, CASP3, AP3D1, PRDX2, ZEB1	135	166	13528	3.0183	1	0.715526	76.3118
GOTERM_BP_FAT	GO:0002683~negative regulation of immune system process	3	1.71429	0.198654	PTPRC, CASP3, PRDX2	135	83	13528	3.62195	1	0.851821	97.4961
GOTERM_BP_FAT	GO:0006955~immune response	5	2.85714	0.915897	PTPRC, ENPP2, MYLPF, PRDX2, ZEB1	135	690	13528	0.726141	1	0.999982	100
Annotation Cluster 30	Enrichment Score: 1.1849685217428738
Category	Term	Count	%	PValue	Genes	List Total	Pop Hits	Pop Total	Fold Enrichment	Bonferroni	Benjamini	FDR
SP_PIR_KEYWORDS	motor protein	5	2.85714	0.0320233	KIF5B, DYNLT3, MYLPF, MYH10, MYL9	175	132	19235	4.16342	0.999958	0.539815	35.4096
GOTERM_MF_FAT	GO:0003774~motor activity	5	2.85714	0.0543012	KIF5B, DYNLT3, MYLPF, MYH10, MYL9	131	142	12983	3.48968	1	0.744459	53.9829
SP_PIR_KEYWORDS	myosin	3	1.71429	0.0777887	MYLPF, MYH10, MYL9	175	51	19235	6.46555	1	0.664281	66.2962
GOTERM_CC_FAT	GO:0016459~myosin complex	3	1.71429	0.134566	MYLPF, MYH10, MYL9	127	65	12782	4.64518	1	0.56582	84.7744
Annotation Cluster 31	Enrichment Score: 1.1377533088494893
Category	Term	Count	%	PValue	Genes	List Total	Pop Hits	Pop Total	Fold Enrichment	Bonferroni	Benjamini	FDR
GOTERM_BP_FAT	GO:0016192~vesicle-mediated transport	13	7.42857	0.0118948	CYTH2, FLNA, APP, PACSIN3, IGF2R, CPNE1, RHOB, AP3D1, SYTL2, CACNA1C, KDELR1, VLDLR, MYH10	135	576	13528	2.26163	1	0.434833	18.0642
GOTERM_CC_FAT	GO:0000267~cell fraction	17	9.71429	0.0664281	ACTB, GNAI2, FARS2, CYTH2, PFKM, GYG1, CD151, SLIT3, APP, IGF2R, SERPINE1, RHOB, SLC13A3, SYTL2, CACNA1C, KDELR1, VLDLR	127	1083	12782	1.57985	1	0.401607	59.1471
GOTERM_CC_FAT	GO:0005624~membrane fraction	12	6.85714	0.173958	APP, GNAI2, IGF2R, RHOB, SLC13A3, SYTL2, CYTH2, CACNA1C, CD151, KDELR1, SLIT3, VLDLR	127	809	12782	1.49289	1	0.643994	91.6999
GOTERM_CC_FAT	GO:0005626~insoluble fraction	12	6.85714	0.204566	APP, GNAI2, IGF2R, RHOB, SLC13A3, SYTL2, CYTH2, CACNA1C, CD151, KDELR1, SLIT3, VLDLR	127	839	12782	1.43951	1	0.666074	94.9239
Annotation Cluster 32	Enrichment Score: 1.0942965297328886
Category	Term	Count	%	PValue	Genes	List Total	Pop Hits	Pop Total	Fold Enrichment	Bonferroni	Benjamini	FDR
GOTERM_MF_FAT	GO:0048029~monosaccharide binding	3	1.71429	0.060625	IGF2R, PFKM, GYG1	131	40	12983	7.43302	1	0.742959	58.0809
GOTERM_MF_FAT	GO:0030246~carbohydrate binding	8	4.57143	0.065111	LPHN2, PTPRC, APP, ENPP2, IGF2R, VCAN, PFKM, GYG1	131	354	12983	2.2397	1	0.749808	60.7797
GOTERM_MF_FAT	GO:0005529~sugar binding	5	2.85714	0.13207	LPHN2, IGF2R, VCAN, PFKM, GYG1	131	195	12983	2.5412	1	0.871422	86.042
Annotation Cluster 33	Enrichment Score: 1.0701546534781075
Category	Term	Count	%	PValue	Genes	List Total	Pop Hits	Pop Total	Fold Enrichment	Bonferroni	Benjamini	FDR
GOTERM_BP_FAT	GO:0044057~regulation of system process	10	5.71429	0.00363143	GNAI2, TNNC1, PINK1, ITGA2, UBB, CNN1, NPY1R, CACNA1C, TPM1, MYL9	135	309	13528	3.24296	0.996119	0.253375	5.8775
GOTERM_BP_FAT	GO:0051971~positive regulation of transmission of nerve impulse	3	1.71429	0.0517719	PINK1, ITGA2, UBB	135	37	13528	8.12492	1	0.670858	58.7332
GOTERM_BP_FAT	GO:0031646~positive regulation of neurological system process	3	1.71429	0.0568758	PINK1, ITGA2, UBB	135	39	13528	7.70826	1	0.672733	62.2797
GOTERM_BP_FAT	GO:0051969~regulation of transmission of nerve impulse	4	2.28571	0.178787	GNAI2, PINK1, ITGA2, UBB	135	147	13528	2.72673	1	0.834681	96.2355
GOTERM_BP_FAT	GO:0031644~regulation of neurological system process	4	2.28571	0.193731	GNAI2, PINK1, ITGA2, UBB	135	153	13528	2.6198	1	0.845425	97.2273
GOTERM_BP_FAT	GO:0051240~positive regulation of multicellular organismal process	5	2.85714	0.223059	PINK1, ITGA2, UBB, NPY1R, TPM1	135	244	13528	2.05343	1	0.868282	98.5039
GOTERM_BP_FAT	GO:0050804~regulation of synaptic transmission	3	1.71429	0.390719	GNAI2, PINK1, UBB	135	136	13528	2.21046	1	0.947843	99.9739
Annotation Cluster 34	Enrichment Score: 1.064904565293991
Category	Term	Count	%	PValue	Genes	List Total	Pop Hits	Pop Total	Fold Enrichment	Bonferroni	Benjamini	FDR
GOTERM_BP_FAT	GO:0032507~maintenance of protein location in cell	3	1.71429	0.0621471	TLN1, KDELR1, FLNA	135	41	13528	7.33225	1	0.679703	65.6406
GOTERM_BP_FAT	GO:0051651~maintenance of location in cell	3	1.71429	0.0817961	TLN1, KDELR1, FLNA	135	48	13528	6.26296	1	0.717562	75.8487
GOTERM_BP_FAT	GO:0045185~maintenance of protein location	3	1.71429	0.0817961	TLN1, KDELR1, FLNA	135	48	13528	6.26296	1	0.717562	75.8487
GOTERM_BP_FAT	GO:0051235~maintenance of location	3	1.71429	0.13228	TLN1, KDELR1, FLNA	135	64	13528	4.69722	1	0.798878	90.5806
Annotation Cluster 35	Enrichment Score: 1.0645422510016822
Category	Term	Count	%	PValue	Genes	List Total	Pop Hits	Pop Total	Fold Enrichment	Bonferroni	Benjamini	FDR
SP_PIR_KEYWORDS	magnesium	10	5.71429	0.0194354	PGM5, FGFR3, CTDSPL, IDH3B, PINK1, ITGA2, DYRK3, PFKM, ABL1, ENO1	175	442	19235	2.48675	0.997722	0.455795	23.1707
GOTERM_MF_FAT	GO:0000287~magnesium ion binding	9	5.14286	0.0840296	PGM5, FARS2, IDH3B, PINK1, ITGA2, DYRK3, PFKM, ABL1, ENO1	131	452	12983	1.97337	1	0.804895	70.4824
UP_SEQ_FEATURE	active site:Proton acceptor	8	4.57143	0.392056	FGFR3, PINK1, DYRK3, STK17A, PFKM, ABL1, AOC2, ENO1	175	658	19113	1.32787	1	0.999998	99.9422
Annotation Cluster 36	Enrichment Score: 1.0283571780171195
Category	Term	Count	%	PValue	Genes	List Total	Pop Hits	Pop Total	Fold Enrichment	Bonferroni	Benjamini	FDR
GOTERM_BP_FAT	GO:0042981~regulation of apoptosis	15	8.57143	0.0281152	PTPRC, MCL1, ACTN1, PRDX2, STK17A, APP, CASP3, IGF2R, JUN, ILK, PSME3, UBB, ABL1, SCAND1, DNAJB6	135	804	13528	1.86954	1	0.573994	37.8004
GOTERM_BP_FAT	GO:0043067~regulation of programmed cell death	15	8.57143	0.0302394	PTPRC, MCL1, ACTN1, PRDX2, STK17A, APP, CASP3, IGF2R, JUN, ILK, PSME3, UBB, ABL1, SCAND1, DNAJB6	135	812	13528	1.85112	1	0.566879	40.0256
GOTERM_BP_FAT	GO:0010941~regulation of cell death	15	8.57143	0.0310657	PTPRC, MCL1, ACTN1, PRDX2, STK17A, APP, CASP3, IGF2R, JUN, ILK, PSME3, UBB, ABL1, SCAND1, DNAJB6	135	815	13528	1.84431	1	0.564088	40.8708
SP_PIR_KEYWORDS	Apoptosis	8	4.57143	0.0585001	APP, PDCL3, CASP3, MCL1, TNFRSF12A, RHOB, PSME3, STK17A	175	381	19235	2.30791	1	0.626012	55.4948
GOTERM_BP_FAT	GO:0006915~apoptosis	11	6.28571	0.0757274	APP, PDCL3, CASP3, MCL1, TNFRSF12A, JUN, RHOB, PSME3, UBB, STK17A, GADD45A	135	602	13528	1.83103	1	0.714002	73.049
GOTERM_BP_FAT	GO:0012501~programmed cell death	11	6.28571	0.0817217	APP, PDCL3, CASP3, MCL1, TNFRSF12A, JUN, RHOB, PSME3, UBB, STK17A, GADD45A	135	611	13528	1.80406	1	0.720703	75.8161
GOTERM_BP_FAT	GO:0051726~regulation of cell cycle	7	4	0.110993	PTPRC, APP, CASP3, JUN, RHOB, GADD45A, FOXN3	135	331	13528	2.11919	1	0.770442	85.8983
GOTERM_BP_FAT	GO:0043065~positive regulation of apoptosis	8	4.57143	0.135048	PTPRC, APP, CASP3, JUN, UBB, STK17A, ABL1, SCAND1	135	430	13528	1.86432	1	0.803659	91.0686
GOTERM_BP_FAT	GO:0043068~positive regulation of programmed cell death	8	4.57143	0.138549	PTPRC, APP, CASP3, JUN, UBB, STK17A, ABL1, SCAND1	135	433	13528	1.85141	1	0.800924	91.6518
GOTERM_BP_FAT	GO:0010942~positive regulation of cell death	8	4.57143	0.140908	PTPRC, APP, CASP3, JUN, UBB, STK17A, ABL1, SCAND1	135	435	13528	1.84289	1	0.795553	92.0243
GOTERM_BP_FAT	GO:0008219~cell death	11	6.28571	0.175615	APP, PDCL3, CASP3, MCL1, TNFRSF12A, JUN, RHOB, PSME3, UBB, STK17A, GADD45A	135	719	13528	1.53308	1	0.834194	95.986
GOTERM_BP_FAT	GO:0016265~death	11	6.28571	0.180887	APP, PDCL3, CASP3, MCL1, TNFRSF12A, JUN, RHOB, PSME3, UBB, STK17A, GADD45A	135	724	13528	1.52249	1	0.836743	96.3927
GOTERM_BP_FAT	GO:0006917~induction of apoptosis	6	3.42857	0.211481	APP, CASP3, UBB, STK17A, ABL1, SCAND1	135	320	13528	1.87889	1	0.863601	98.086
GOTERM_BP_FAT	GO:0012502~induction of programmed cell death	6	3.42857	0.213251	APP, CASP3, UBB, STK17A, ABL1, SCAND1	135	321	13528	1.87304	1	0.861711	98.1563
Annotation Cluster 37	Enrichment Score: 1.010105150618174
Category	Term	Count	%	PValue	Genes	List Total	Pop Hits	Pop Total	Fold Enrichment	Bonferroni	Benjamini	FDR
GOTERM_CC_FAT	GO:0005938~cell cortex	5	2.85714	0.0562793	ACTB, CAPZB, FLNA, MYH10, TMOD1	127	146	12782	3.44677	1	0.368578	52.9698
GOTERM_CC_FAT	GO:0030863~cortical cytoskeleton	3	1.71429	0.0840288	ACTB, CAPZB, TMOD1	127	49	12782	6.16198	1	0.452576	68.1161
GOTERM_CC_FAT	GO:0044448~cell cortex part	3	1.71429	0.1972	ACTB, CAPZB, TMOD1	127	83	12782	3.6378	1	0.657987	94.2765
Annotation Cluster 38	Enrichment Score: 0.9250521838547981
Category	Term	Count	%	PValue	Genes	List Total	Pop Hits	Pop Total	Fold Enrichment	Bonferroni	Benjamini	FDR
UP_SEQ_FEATURE	domain:SH3	5	2.85714	0.0782929	PACSIN3, BAIAP2, ABL1, SPATA13, ARHGAP10	175	177	19113	3.08523	1	0.999577	70.5224
SP_PIR_KEYWORDS	sh3 domain	5	2.85714	0.123331	PACSIN3, BAIAP2, ABL1, SPATA13, ARHGAP10	175	210	19235	2.61701	1	0.779369	82.9278
SMART	SM00326:SH3	5	2.85714	0.143052	PACSIN3, BAIAP2, ABL1, SPATA13, ARHGAP10	87	213	9079	2.44968	1	0.946773	81.6755
INTERPRO	IPR001452:Src homology-3 domain	5	2.85714	0.144378	PACSIN3, BAIAP2, ABL1, SPATA13, ARHGAP10	159	213	16659	2.45947	1	0.999296	88.8034
Annotation Cluster 39	Enrichment Score: 0.9234218236526494
Category	Term	Count	%	PValue	Genes	List Total	Pop Hits	Pop Total	Fold Enrichment	Bonferroni	Benjamini	FDR
GOTERM_BP_FAT	GO:0051248~negative regulation of protein metabolic process	6	3.42857	0.0383501	PTPRC, JUN, PSME3, UBB, FLNA, TIMP1	135	187	13528	3.21521	1	0.612177	47.8524
GOTERM_BP_FAT	GO:0032268~regulation of cellular protein metabolic process	9	5.14286	0.0987114	PTPRC, APP, PACSIN3, PDGFA, JUN, ITGA2, PSME3, UBB, TIMP1	135	474	13528	1.90267	1	0.754268	82.279
GOTERM_BP_FAT	GO:0032269~negative regulation of cellular protein metabolic process	5	2.85714	0.103715	PTPRC, JUN, PSME3, UBB, TIMP1	135	180	13528	2.78354	1	0.766126	83.8477
GOTERM_BP_FAT	GO:0031400~negative regulation of protein modification process	4	2.28571	0.11427	PTPRC, JUN, PSME3, UBB	135	119	13528	3.36832	1	0.775371	86.7392
GOTERM_BP_FAT	GO:0010605~negative regulation of macromolecule metabolic process	11	6.28571	0.191652	PTPRC, JUN, PSME3, UBB, ZEB1, TBL1X, FOXN3, FLNA, DNAJB6, TIMP1, ENO1	135	734	13528	1.50175	1	0.843593	97.1058
GOTERM_BP_FAT	GO:0031399~regulation of protein modification process	5	2.85714	0.335001	PTPRC, PDGFA, JUN, PSME3, UBB	135	295	13528	1.69843	1	0.926891	99.8878
Annotation Cluster 40	Enrichment Score: 0.9003238228605436
Category	Term	Count	%	PValue	Genes	List Total	Pop Hits	Pop Total	Fold Enrichment	Bonferroni	Benjamini	FDR
GOTERM_CC_FAT	GO:0060205~cytoplasmic membrane-bounded vesicle lumen	4	2.28571	0.00922881	APP, PDGFA, ACTN1, TIMP1	127	44	12782	9.14961	0.905107	0.101515	11.3743
GOTERM_CC_FAT	GO:0031983~vesicle lumen	4	2.28571	0.0104285	APP, PDGFA, ACTN1, TIMP1	127	46	12782	8.7518	0.930243	0.105014	12.7618
GOTERM_CC_FAT	GO:0031093~platelet alpha granule lumen	3	1.71429	0.0616071	APP, ACTN1, TIMP1	127	41	12782	7.36432	1	0.38702	56.3127
GOTERM_CC_FAT	GO:0031091~platelet alpha granule	3	1.71429	0.105339	APP, ACTN1, TIMP1	127	56	12782	5.39173	1	0.489909	76.5346
GOTERM_CC_FAT	GO:0030141~secretory granule	4	2.28571	0.26177	APP, PDGFA, ACTN1, TIMP1	127	180	12782	2.23657	1	0.71159	98.0795
GOTERM_CC_FAT	GO:0044433~cytoplasmic vesicle part	4	2.28571	0.28047	APP, PDGFA, ACTN1, TIMP1	127	187	12782	2.15285	1	0.734749	98.625
GOTERM_CC_FAT	GO:0016023~cytoplasmic membrane-bounded vesicle	8	4.57143	0.299183	APP, ATP1B3, PDGFA, IGF2R, ACTN1, SYTL2, NPY1R, TIMP1	127	550	12782	1.46394	1	0.734974	99.0244
GOTERM_CC_FAT	GO:0031988~membrane-bounded vesicle	8	4.57143	0.327756	APP, ATP1B3, PDGFA, IGF2R, ACTN1, SYTL2, NPY1R, TIMP1	127	568	12782	1.41754	1	0.758463	99.4327
GOTERM_CC_FAT	GO:0031410~cytoplasmic vesicle	8	4.57143	0.447879	APP, ATP1B3, PDGFA, IGF2R, ACTN1, SYTL2, NPY1R, TIMP1	127	642	12782	1.25415	1	0.85547	99.9563
GOTERM_CC_FAT	GO:0031982~vesicle	8	4.57143	0.492856	APP, ATP1B3, PDGFA, IGF2R, ACTN1, SYTL2, NPY1R, TIMP1	127	670	12782	1.20174	1	0.877925	99.9856
Annotation Cluster 41	Enrichment Score: 0.8888307183733065
Category	Term	Count	%	PValue	Genes	List Total	Pop Hits	Pop Total	Fold Enrichment	Bonferroni	Benjamini	FDR
SP_PIR_KEYWORDS	isopeptide bond	7	4	0.0702789	HIST1H2BC, MCL1, UBB, ZEB1, KCNA5, MAP7D1, TPM1	175	319	19235	2.41191	1	0.641853	62.4178
UP_SEQ_FEATURE	cross-link:Glycyl lysine isopeptide (Lys-Gly) (interchain with G-Cter in ubiquitin)	5	2.85714	0.108124	HIST1H2BC, MCL1, UBB, MAP7D1, TPM1	175	199	19113	2.74415	1	0.999515	81.9943
SP_PIR_KEYWORDS	ubl conjugation	8	4.57143	0.283637	HIST1H2BC, MCL1, HIRA, UBB, ZEB1, KCNA5, MAP7D1, TPM1	175	588	19235	1.49543	1	0.899532	98.8664
Annotation Cluster 42	Enrichment Score: 0.8763992929937852
Category	Term	Count	%	PValue	Genes	List Total	Pop Hits	Pop Total	Fold Enrichment	Bonferroni	Benjamini	FDR
GOTERM_BP_FAT	GO:0040008~regulation of growth	8	4.57143	0.0530172	APP, TNFRSF12A, IGFBP7, ILK, UBB, NPY1R, CACNA1C, ENO1	135	341	13528	2.35091	1	0.669904	59.6263
GOTERM_BP_FAT	GO:0032535~regulation of cellular component size	6	3.42857	0.131811	APP, FGFR3, TNFRSF12A, ILK, CAPZB, ENO1	135	271	13528	2.21861	1	0.800044	90.4955
GOTERM_BP_FAT	GO:0008361~regulation of cell size	5	2.85714	0.147999	APP, FGFR3, TNFRSF12A, ILK, ENO1	135	206	13528	2.43222	1	0.801832	93.0523
GOTERM_BP_FAT	GO:0001558~regulation of cell growth	4	2.28571	0.301839	TNFRSF12A, IGFBP7, ILK, ENO1	135	194	13528	2.06613	1	0.916341	99.7477
Annotation Cluster 43	Enrichment Score: 0.8669697634531327
Category	Term	Count	%	PValue	Genes	List Total	Pop Hits	Pop Total	Fold Enrichment	Bonferroni	Benjamini	FDR
GOTERM_BP_FAT	GO:0031589~cell-substrate adhesion	4	2.28571	0.0734064	TNFRSF12A, ILK, ITGA2, ACTN1	135	98	13528	4.0901	1	0.706142	71.8998
GOTERM_BP_FAT	GO:0031346~positive regulation of cell projection organization	3	1.71429	0.0788829	TNFRSF12A, ILK, ITGA2	135	47	13528	6.39622	1	0.714606	74.5407
GOTERM_BP_FAT	GO:0031344~regulation of cell projection organization	3	1.71429	0.220408	TNFRSF12A, ILK, ITGA2	135	89	13528	3.37778	1	0.867479	98.4166
GOTERM_BP_FAT	GO:0051130~positive regulation of cellular component organization	4	2.28571	0.266794	TNFRSF12A, ILK, ITGA2, TPM1	135	181	13528	2.21453	1	0.897381	99.4298
Annotation Cluster 44	Enrichment Score: 0.8503013015447978
Category	Term	Count	%	PValue	Genes	List Total	Pop Hits	Pop Total	Fold Enrichment	Bonferroni	Benjamini	FDR
GOTERM_BP_FAT	GO:0006813~potassium ion transport	6	3.42857	0.0214544	KCTD10, ATP1B3, KCNAB1, KCNA5, KCNMB1, KCNK3	135	160	13528	3.75778	1	0.536832	30.3091
SP_PIR_KEYWORDS	potassium	5	2.85714	0.0276392	BCKDHA, ATP1B3, KCNAB1, KCNA5, KCNK3	175	126	19235	4.36168	0.999832	0.515223	31.3683
GOTERM_MF_FAT	GO:0015459~potassium channel regulator activity	3	1.71429	0.0317368	KCNAB1, KCNA5, KCNMB1	131	28	12983	10.6186	0.999997	0.753685	36.1321
GOTERM_BP_FAT	GO:0015672~monovalent inorganic cation transport	8	4.57143	0.0388753	KCTD10, NNT, ATP1B3, KCNAB1, SLC13A3, KCNA5, KCNMB1, KCNK3	135	318	13528	2.52094	1	0.611488	48.3246
GOTERM_MF_FAT	GO:0030955~potassium ion binding	5	2.85714	0.0396239	BCKDHA, ATP1B3, KCNAB1, KCNA5, KCNK3	131	128	12983	3.87136	1	0.703592	42.9964
GOTERM_MF_FAT	GO:0005267~potassium channel activity	5	2.85714	0.0445682	KCTD10, KCNAB1, KCNA5, KCNMB1, KCNK3	131	133	12983	3.72582	1	0.720098	46.9434
GOTERM_BP_FAT	GO:0006812~cation transport	11	6.28571	0.0480323	KCTD10, PTPRC, NNT, ATP1B3, KCNAB1, SLC13A3, KCNA5, AQP1, CACNA1C, KCNMB1, KCNK3	135	553	13528	1.99328	1	0.652842	55.9383
GOTERM_MF_FAT	GO:0031420~alkali metal ion binding	6	3.42857	0.0790143	BCKDHA, ATP1B3, KCNAB1, SLC13A3, KCNA5, KCNK3	131	228	12983	2.60808	1	0.799948	68.1545
SP_PIR_KEYWORDS	potassium transport	4	2.28571	0.0864681	ATP1B3, KCNAB1, KCNA5, KCNK3	175	115	19235	3.82311	1	0.689056	70.3157
GOTERM_BP_FAT	GO:0030001~metal ion transport	9	5.14286	0.0908727	KCTD10, PTPRC, ATP1B3, KCNAB1, SLC13A3, KCNA5, CACNA1C, KCNMB1, KCNK3	135	465	13528	1.9395	1	0.733307	79.5306
GOTERM_MF_FAT	GO:0016247~channel regulator activity	3	1.71429	0.117879	KCNAB1, KCNA5, KCNMB1	131	59	12983	5.03933	1	0.881428	82.5119
GOTERM_MF_FAT	GO:0015267~channel activity	8	4.57143	0.119722	KCTD10, MCL1, KCNAB1, KCNA5, AQP1, CACNA1C, KCNMB1, KCNK3	131	412	12983	1.92441	1	0.874754	83.0132
GOTERM_MF_FAT	GO:0022803~passive transmembrane transporter activity	8	4.57143	0.120827	KCTD10, MCL1, KCNAB1, KCNA5, AQP1, CACNA1C, KCNMB1, KCNK3	131	413	12983	1.91975	1	0.866548	83.3072
GOTERM_MF_FAT	GO:0022832~voltage-gated channel activity	5	2.85714	0.13207	KCTD10, KCNAB1, KCNA5, CACNA1C, KCNK3	131	195	12983	2.5412	1	0.871422	86.042
GOTERM_MF_FAT	GO:0005244~voltage-gated ion channel activity	5	2.85714	0.13207	KCTD10, KCNAB1, KCNA5, CACNA1C, KCNK3	131	195	12983	2.5412	1	0.871422	86.042
GOTERM_BP_FAT	GO:0006811~ion transport	12	6.85714	0.139779	KCTD10, PTPRC, NNT, ATP1B3, KCNAB1, SLC13A3, SLC25A1, KCNA5, AQP1, CACNA1C, KCNMB1, KCNK3	135	768	13528	1.56574	1	0.79721	91.848
GOTERM_CC_FAT	GO:0034703~cation channel complex	4	2.28571	0.14151	KCTD10, KCNA5, CACNA1C, KCNMB1	127	132	12782	3.04987	1	0.577359	86.291
GOTERM_MF_FAT	GO:0005261~cation channel activity	6	3.42857	0.142144	KCTD10, KCNAB1, KCNA5, CACNA1C, KCNMB1, KCNK3	131	275	12983	2.16233	1	0.873455	88.1331
SP_PIR_KEYWORDS	voltage-gated channel	4	2.28571	0.153577	KCNAB1, KCNA5, CACNA1C, KCNK3	175	150	19235	2.93105	1	0.82146	89.3461
GOTERM_MF_FAT	GO:0022843~voltage-gated cation channel activity	4	2.28571	0.182706	KCTD10, KCNAB1, KCNA5, CACNA1C	131	147	12983	2.69679	1	0.908416	93.948
GOTERM_MF_FAT	GO:0022836~gated channel activity	6	3.42857	0.199804	KCTD10, KCNAB1, KCNA5, CACNA1C, KCNMB1, KCNK3	131	310	12983	1.9182	1	0.922953	95.4893
GOTERM_CC_FAT	GO:0008076~voltage-gated potassium channel complex	3	1.71429	0.207987	KCTD10, KCNA5, KCNMB1	127	86	12782	3.5109	1	0.666062	95.201
GOTERM_CC_FAT	GO:0034705~potassium channel complex	3	1.71429	0.207987	KCTD10, KCNA5, KCNMB1	127	86	12782	3.5109	1	0.666062	95.201
GOTERM_MF_FAT	GO:0022838~substrate specific channel activity	7	4	0.209243	KCTD10, KCNAB1, KCNA5, AQP1, CACNA1C, KCNMB1, KCNK3	131	398	12983	1.74309	1	0.921903	96.1752
GOTERM_MF_FAT	GO:0046873~metal ion transmembrane transporter activity	6	3.42857	0.232181	KCTD10, KCNAB1, KCNA5, CACNA1C, KCNMB1, KCNK3	131	328	12983	1.81293	1	0.929263	97.4597
GOTERM_MF_FAT	GO:0005249~voltage-gated potassium channel activity	3	1.71429	0.264708	KCTD10, KCNAB1, KCNA5	131	100	12983	2.97321	1	0.926733	98.6083
GOTERM_BP_FAT	GO:0019226~transmission of nerve impulse	6	3.42857	0.266453	APP, ILK, UBB, CACNA1C, KCNMB1, KCNK3	135	350	13528	1.71784	1	0.898155	99.4254
SP_PIR_KEYWORDS	ionic channel	5	2.85714	0.324815	KCNAB1, KCNA5, CACNA1C, KCNMB1, KCNK3	175	318	19235	1.72821	1	0.920867	99.4881
GOTERM_CC_FAT	GO:0034702~ion channel complex	4	2.28571	0.329	KCTD10, KCNA5, CACNA1C, KCNMB1	127	205	12782	1.96382	1	0.755255	99.4462
SP_PIR_KEYWORDS	transport	18	10.2857	0.341643	MFSD7, NDUFB11, ATP1B3, KCNAB1, CHMP6, KCNA5, AQP1, KCNMB1, KCNK3, IGF2R, AP3D1, RHOB, SLC13A3, SLC25A1, RAB10, CACNA1C, KDELR1, VLDLR	175	1670	19235	1.1847	1	0.928962	99.6353
GOTERM_BP_FAT	GO:0007268~synaptic transmission	5	2.85714	0.34176	APP, UBB, CACNA1C, KCNMB1, KCNK3	135	298	13528	1.68133	1	0.929202	99.9054
GOTERM_MF_FAT	GO:0005216~ion channel activity	6	3.42857	0.344238	KCTD10, KCNAB1, KCNA5, CACNA1C, KCNMB1, KCNK3	131	386	12983	1.54052	1	0.95553	99.7166
SP_PIR_KEYWORDS	ion transport	7	4	0.424842	ATP1B3, KCNAB1, SLC13A3, KCNA5, CACNA1C, KCNMB1, KCNK3	175	578	19235	1.33114	1	0.950617	99.9406
GOTERM_BP_FAT	GO:0055085~transmembrane transport	7	4	0.497085	MFSD7, KCNAB1, SLC13A3, SLC25A1, KCNA5, AQP1, CACNA1C	135	569	13528	1.23278	1	0.973131	99.9989
GOTERM_BP_FAT	GO:0007267~cell-cell signaling	6	3.42857	0.714595	APP, PDGFA, UBB, CACNA1C, KCNMB1, KCNK3	135	600	13528	1.00207	1	0.997072	100
Annotation Cluster 45	Enrichment Score: 0.8371921753148492
Category	Term	Count	%	PValue	Genes	List Total	Pop Hits	Pop Total	Fold Enrichment	Bonferroni	Benjamini	FDR
UP_SEQ_FEATURE	domain:EGF-like 1	5	2.85714	0.0241224	CRELD2, VCAN, RELN, SLIT3, VLDLR	175	120	19113	4.55071	1	0.982952	30.6399
SMART	SM00179:EGF_CA	4	2.28571	0.0625681	CRELD2, VCAN, SLIT3, VLDLR	87	96	9079	4.34818	0.997841	0.870752	50.8458
INTERPRO	IPR001881:EGF-like calcium-binding	4	2.28571	0.0632013	CRELD2, VCAN, SLIT3, VLDLR	159	96	16659	4.36557	1	0.995793	60.0193
INTERPRO	IPR018097:EGF-like calcium-binding, conserved site	4	2.28571	0.0632013	CRELD2, VCAN, SLIT3, VLDLR	159	96	16659	4.36557	1	0.995793	60.0193
UP_SEQ_FEATURE	domain:EGF-like 2; calcium-binding	3	1.71429	0.095082	CRELD2, VCAN, VLDLR	175	57	19113	5.74827	1	0.999391	77.6194
INTERPRO	IPR000742:EGF-like, type 3	5	2.85714	0.113268	CRELD2, VCAN, RELN, SLIT3, VLDLR	159	194	16659	2.70035	1	0.99925	81.5121
SMART	SM00181:EGF	5	2.85714	0.122942	CRELD2, VCAN, RELN, SLIT3, VLDLR	87	201	9079	2.59593	0.999996	0.955647	76.3535
INTERPRO	IPR006210:EGF-like	5	2.85714	0.124488	CRELD2, VCAN, RELN, SLIT3, VLDLR	159	201	16659	2.60631	1	0.999054	84.5393
UP_SEQ_FEATURE	domain:EGF-like 3	3	1.71429	0.149115	RELN, SLIT3, VLDLR	175	75	19113	4.36869	1	0.999748	91.1029
SP_PIR_KEYWORDS	egf-like domain	5	2.85714	0.155912	CRELD2, VCAN, RELN, SLIT3, VLDLR	175	230	19235	2.38944	1	0.816397	89.7339
INTERPRO	IPR000152:EGF-type aspartate/asparagine hydroxylation conserved site	3	1.71429	0.234597	CRELD2, VCAN, VLDLR	159	97	16659	3.24042	1	0.999912	97.6581
INTERPRO	IPR013032:EGF-like region, conserved site	5	2.85714	0.302675	CRELD2, VCAN, RELN, SLIT3, VLDLR	159	293	16659	1.78795	1	0.999979	99.3669
INTERPRO	IPR006209:EGF	3	1.71429	0.339624	VCAN, SLIT3, VLDLR	159	127	16659	2.47497	1	0.999964	99.7052
GOTERM_CC_FAT	GO:0044421~extracellular region part	10	5.71429	0.611651	COL21A1, PDGFA, IGFBP7, VCAN, RELN, LOXL1, EMILIN1, SLIT3, VLDLR, TIMP1	127	960	12782	1.04839	1	0.930707	99.9996
GOTERM_CC_FAT	GO:0005615~extracellular space	6	3.42857	0.812193	PDGFA, IGFBP7, RELN, LOXL1, SLIT3, VLDLR	127	685	12782	0.881568	1	0.985704	100
Annotation Cluster 46	Enrichment Score: 0.8350766010672603
Category	Term	Count	%	PValue	Genes	List Total	Pop Hits	Pop Total	Fold Enrichment	Bonferroni	Benjamini	FDR
KEGG_PATHWAY	hsa04010:MAPK signaling pathway	9	5.14286	0.0178671	CASP3, ATF4, FGFR3, PDGFA, JUN, RAP1A, CACNA1C, GADD45A, FLNA	65	267	5085	2.63699	0.783991	0.130044	17.6313
KEGG_PATHWAY	hsa05200:Pathways in cancer	6	3.42857	0.397053	CASP3, FGFR3, PDGFA, JUN, ITGA2, ABL1	65	328	5085	1.43105	1	0.883537	99.5674
GOTERM_BP_FAT	GO:0007167~enzyme linked receptor protein signaling pathway	5	2.85714	0.440421	FGFR3, PDGFA, BAIAP2, JUN, FLNA	135	342	13528	1.46502	1	0.962876	99.9937
Annotation Cluster 47	Enrichment Score: 0.8295841863918167
Category	Term	Count	%	PValue	Genes	List Total	Pop Hits	Pop Total	Fold Enrichment	Bonferroni	Benjamini	FDR
UP_SEQ_FEATURE	domain:VWFA	3	1.71429	0.109457	COL21A1, CPNE1, ITGA2	175	62	19113	5.2847	1	0.999114	82.3935
SMART	SM00327:VWA	3	1.71429	0.171926	COL21A1, CPNE1, ITGA2	87	79	9079	3.9629	1	0.949561	87.4278
INTERPRO	IPR002035:von Willebrand factor, type A	3	1.71429	0.172449	COL21A1, CPNE1, ITGA2	159	79	16659	3.97874	1	0.999261	92.9911
Annotation Cluster 48	Enrichment Score: 0.806002374733329
Category	Term	Count	%	PValue	Genes	List Total	Pop Hits	Pop Total	Fold Enrichment	Bonferroni	Benjamini	FDR
GOTERM_BP_FAT	GO:0031589~cell-substrate adhesion	4	2.28571	0.0734064	TNFRSF12A, ILK, ITGA2, ACTN1	135	98	13528	4.0901	1	0.706142	71.8998
GOTERM_MF_FAT	GO:0005178~integrin binding	3	1.71429	0.117879	ILK, ITGA2, ACTN1	131	59	12983	5.03933	1	0.881428	82.5119
GOTERM_BP_FAT	GO:0007160~cell-matrix adhesion	3	1.71429	0.220408	ILK, ITGA2, ACTN1	135	89	13528	3.37778	1	0.867479	98.4166
GOTERM_MF_FAT	GO:0032403~protein complex binding	4	2.28571	0.313035	BCKDHA, ILK, ITGA2, ACTN1	131	196	12983	2.02259	1	0.940588	99.4591
Annotation Cluster 49	Enrichment Score: 0.7744784773420167
Category	Term	Count	%	PValue	Genes	List Total	Pop Hits	Pop Total	Fold Enrichment	Bonferroni	Benjamini	FDR
GOTERM_BP_FAT	GO:0048872~homeostasis of number of cells	4	2.28571	0.0769628	CASP3, PRDX2, DYRK3, TIMP1	135	100	13528	4.0083	1	0.712649	73.6426
GOTERM_BP_FAT	GO:0048534~hemopoietic or lymphoid organ development	6	3.42857	0.116179	KLF6, PTPRC, PRDX2, DYRK3, SCAND1, TIMP1	135	260	13528	2.31248	1	0.775917	87.2071
GOTERM_BP_FAT	GO:0002520~immune system development	6	3.42857	0.139218	KLF6, PTPRC, PRDX2, DYRK3, SCAND1, TIMP1	135	276	13528	2.17842	1	0.79806	91.7591
GOTERM_BP_FAT	GO:0030097~hemopoiesis	5	2.85714	0.206442	KLF6, PTPRC, DYRK3, SCAND1, TIMP1	135	236	13528	2.12304	1	0.859185	97.8719
GOTERM_BP_FAT	GO:0030099~myeloid cell differentiation	3	1.71429	0.235022	DYRK3, SCAND1, TIMP1	135	93	13528	3.2325	1	0.878441	98.8445
GOTERM_BP_FAT	GO:0002521~leukocyte differentiation	3	1.71429	0.37335	KLF6, PTPRC, SCAND1	135	131	13528	2.29483	1	0.94363	99.9583
Annotation Cluster 50	Enrichment Score: 0.7726029070665124
Category	Term	Count	%	PValue	Genes	List Total	Pop Hits	Pop Total	Fold Enrichment	Bonferroni	Benjamini	FDR
GOTERM_BP_FAT	GO:0042592~homeostatic process	15	8.57143	0.01673	PTPRC, MCL1, ITGA2, PRDX2, PFKM, KCNA5, NPY1R, TIMP1, APP, CASP3, JUN, ILK, SERPINE1, DYRK3, CACNA1C	135	751	13528	2.00148	1	0.492128	24.4903
GOTERM_BP_FAT	GO:0019725~cellular homeostasis	10	5.71429	0.0420727	PTPRC, APP, MCL1, JUN, ILK, PRDX2, NPY1R, PFKM, KCNA5, CACNA1C	135	466	13528	2.15037	1	0.629843	51.1135
GOTERM_BP_FAT	GO:0007611~learning or memory	4	2.28571	0.0978204	APP, JUN, CACNA1C, VLDLR	135	111	13528	3.61108	1	0.754038	81.985
GOTERM_BP_FAT	GO:0006874~cellular calcium ion homeostasis	5	2.85714	0.10847	PTPRC, APP, NPY1R, KCNA5, CACNA1C	135	183	13528	2.73791	1	0.767783	85.2169
GOTERM_BP_FAT	GO:0051480~cytosolic calcium ion homeostasis	4	2.28571	0.112159	PTPRC, NPY1R, KCNA5, CACNA1C	135	118	13528	3.39686	1	0.77143	86.203
GOTERM_BP_FAT	GO:0055074~calcium ion homeostasis	5	2.85714	0.116611	PTPRC, APP, NPY1R, KCNA5, CACNA1C	135	188	13528	2.66509	1	0.774588	87.3107
GOTERM_BP_FAT	GO:0007612~learning	3	1.71429	0.119063	APP, JUN, CACNA1C	135	60	13528	5.01037	1	0.776782	87.8846
GOTERM_BP_FAT	GO:0006875~cellular metal ion homeostasis	5	2.85714	0.130173	PTPRC, APP, NPY1R, KCNA5, CACNA1C	135	196	13528	2.55631	1	0.79813	90.1924
GOTERM_BP_FAT	GO:0048878~chemical homeostasis	9	5.14286	0.135873	PTPRC, APP, JUN, ILK, SERPINE1, NPY1R, PFKM, KCNA5, CACNA1C	135	512	13528	1.76146	1	0.803411	91.2092
GOTERM_BP_FAT	GO:0007626~locomotory behavior	6	3.42857	0.136233	APP, ENPP2, PDGFA, RELN, NPY1R, CACNA1C	135	274	13528	2.19432	1	0.799676	91.2702
GOTERM_BP_FAT	GO:0055065~metal ion homeostasis	5	2.85714	0.146175	PTPRC, APP, NPY1R, KCNA5, CACNA1C	135	205	13528	2.44408	1	0.801797	92.8005
GOTERM_BP_FAT	GO:0009628~response to abiotic stimulus	7	4	0.158548	PTPRC, APP, CASP3, IGFBP7, JUN, ITGA2, CACNA1C	135	368	13528	1.90612	1	0.813231	94.3539
GOTERM_BP_FAT	GO:0006873~cellular ion homeostasis	7	4	0.167	PTPRC, APP, JUN, ILK, NPY1R, KCNA5, CACNA1C	135	374	13528	1.87554	1	0.82305	95.2275
GOTERM_BP_FAT	GO:0055082~cellular chemical homeostasis	7	4	0.175641	PTPRC, APP, JUN, ILK, NPY1R, KCNA5, CACNA1C	135	380	13528	1.84593	1	0.832428	95.9882
GOTERM_BP_FAT	GO:0007610~behavior	8	4.57143	0.183871	APP, ENPP2, PDGFA, JUN, RELN, NPY1R, CACNA1C, VLDLR	135	469	13528	1.70929	1	0.836868	96.6054
GOTERM_BP_FAT	GO:0030005~cellular di-, tri-valent inorganic cation homeostasis	5	2.85714	0.188217	PTPRC, APP, NPY1R, KCNA5, CACNA1C	135	227	13528	2.20721	1	0.841077	96.8941
GOTERM_BP_FAT	GO:0055066~di-, tri-valent inorganic cation homeostasis	5	2.85714	0.212631	PTPRC, APP, NPY1R, KCNA5, CACNA1C	135	239	13528	2.09639	1	0.863776	98.132
GOTERM_BP_FAT	GO:0050801~ion homeostasis	7	4	0.219823	PTPRC, APP, JUN, ILK, NPY1R, KCNA5, CACNA1C	135	409	13528	1.71504	1	0.868098	98.3966
GOTERM_BP_FAT	GO:0030003~cellular cation homeostasis	5	2.85714	0.244303	PTPRC, APP, NPY1R, KCNA5, CACNA1C	135	254	13528	1.97259	1	0.884544	99.057
GOTERM_BP_FAT	GO:0055080~cation homeostasis	5	2.85714	0.314777	PTPRC, APP, NPY1R, KCNA5, CACNA1C	135	286	13528	1.75188	1	0.919457	99.8152
GOTERM_BP_FAT	GO:0009314~response to radiation	4	2.28571	0.31811	PTPRC, APP, CASP3, CACNA1C	135	200	13528	2.00415	1	0.920291	99.8296
GOTERM_BP_FAT	GO:0042391~regulation of membrane potential	3	1.71429	0.384023	JUN, ILK, KCNA5	135	134	13528	2.24345	1	0.945583	99.9686
GOTERM_BP_FAT	GO:0009416~response to light stimulus	3	1.71429	0.397978	APP, CASP3, CACNA1C	135	138	13528	2.17842	1	0.949708	99.9786
KEGG_PATHWAY	hsa05010:Alzheimer's disease	3	1.71429	0.614007	APP, CASP3, CACNA1C	65	163	5085	1.43983	1	0.970342	99.9964
GOTERM_CC_FAT	GO:0045202~synapse	4	2.28571	0.68432	APP, NPY1R, CACNA1C, MYH10	127	355	12782	1.13404	1	0.954171	100
Annotation Cluster 51	Enrichment Score: 0.7718532532931706
Category	Term	Count	%	PValue	Genes	List Total	Pop Hits	Pop Total	Fold Enrichment	Bonferroni	Benjamini	FDR
GOTERM_BP_FAT	GO:0051094~positive regulation of developmental process	7	4	0.0582546	PRPF19, PTPRC, TNFRSF12A, JUN, ILK, AP3D1, RHOB	135	278	13528	2.52321	1	0.67721	63.1875
GOTERM_BP_FAT	GO:0045597~positive regulation of cell differentiation	6	3.42857	0.077415	PRPF19, PTPRC, TNFRSF12A, JUN, ILK, AP3D1	135	229	13528	2.62552	1	0.711196	73.8567
GOTERM_BP_FAT	GO:0048638~regulation of developmental growth	3	1.71429	0.0788829	TNFRSF12A, ILK, UBB	135	47	13528	6.39622	1	0.714606	74.5407
GOTERM_BP_FAT	GO:0050769~positive regulation of neurogenesis	3	1.71429	0.115813	PRPF19, TNFRSF12A, ILK	135	59	13528	5.09529	1	0.77746	87.1186
GOTERM_BP_FAT	GO:0010720~positive regulation of cell development	3	1.71429	0.149241	PRPF19, TNFRSF12A, ILK	135	69	13528	4.35684	1	0.802624	93.2191
GOTERM_BP_FAT	GO:0051960~regulation of nervous system development	4	2.28571	0.296425	PRPF19, TNFRSF12A, ILK, UBB	135	192	13528	2.08765	1	0.914656	99.7131
GOTERM_BP_FAT	GO:0060284~regulation of cell development	4	2.28571	0.331683	PRPF19, TNFRSF12A, ILK, UBB	135	205	13528	1.95527	1	0.926156	99.8781
GOTERM_BP_FAT	GO:0045664~regulation of neuron differentiation	3	1.71429	0.380496	PRPF19, TNFRSF12A, ILK	135	133	13528	2.26032	1	0.944956	99.9655
GOTERM_BP_FAT	GO:0050767~regulation of neurogenesis	3	1.71429	0.491527	PRPF19, TNFRSF12A, ILK	135	166	13528	1.81098	1	0.972571	99.9987
Annotation Cluster 52	Enrichment Score: 0.7690989726036894
Category	Term	Count	%	PValue	Genes	List Total	Pop Hits	Pop Total	Fold Enrichment	Bonferroni	Benjamini	FDR
GOTERM_BP_FAT	GO:0016192~vesicle-mediated transport	13	7.42857	0.0118948	CYTH2, FLNA, APP, PACSIN3, IGF2R, CPNE1, RHOB, AP3D1, SYTL2, CACNA1C, KDELR1, VLDLR, MYH10	135	576	13528	2.26163	1	0.434833	18.0642
GOTERM_BP_FAT	GO:0006897~endocytosis	5	2.85714	0.174428	APP, PACSIN3, IGF2R, CYTH2, VLDLR	135	220	13528	2.27744	1	0.833787	95.8887
GOTERM_BP_FAT	GO:0010324~membrane invagination	5	2.85714	0.174428	APP, PACSIN3, IGF2R, CYTH2, VLDLR	135	220	13528	2.27744	1	0.833787	95.8887
SP_PIR_KEYWORDS	Endocytosis	3	1.71429	0.215633	APP, PACSIN3, VLDLR	175	96	19235	3.43482	1	0.869309	96.1681
GOTERM_BP_FAT	GO:0016044~membrane organization	6	3.42857	0.326201	APP, PACSIN3, IGF2R, CYTH2, MYH10, VLDLR	135	381	13528	1.57807	1	0.92383	99.8603
GOTERM_CC_FAT	GO:0012505~endomembrane system	5	2.85714	0.954155	PGAP3, APP, CHMP6, IGF2R, VLDLR	127	782	12782	0.643515	1	0.99938	100
Annotation Cluster 53	Enrichment Score: 0.7670848853236545
Category	Term	Count	%	PValue	Genes	List Total	Pop Hits	Pop Total	Fold Enrichment	Bonferroni	Benjamini	FDR
GOTERM_CC_FAT	GO:0031974~membrane-enclosed lumen	25	14.2857	0.0960356	MCL1, PDGFA, FARS2, ZEB1, TIMP1, PRPF19, CASP3, APP, ACTB, PABPN1, BCKDHA, PRPF31, NOL7, ACTN1, IDH3B, C19ORF33, KCTD10, ATF4, IGF2R, JUN, SNRPB, UBB, TBL1X, ABL1, RERE	127	1856	12782	1.35568	1	0.481891	73.1502
GOTERM_CC_FAT	GO:0043233~organelle lumen	24	13.7143	0.123079	BCKDHA, ACTB, PABPN1, PRPF31, MCL1, PDGFA, FARS2, NOL7, ACTN1, IDH3B, ZEB1, TIMP1, C19ORF33, PRPF19, KCTD10, CASP3, ATF4, APP, JUN, SNRPB, UBB, ABL1, TBL1X, RERE	127	1820	12782	1.3272	1	0.539669	81.9218
GOTERM_CC_FAT	GO:0005654~nucleoplasm	13	7.42857	0.159791	ACTB, PABPN1, PRPF31, MCL1, ZEB1, PRPF19, ATF4, CASP3, JUN, SNRPB, UBB, TBL1X, RERE	127	882	12782	1.48344	1	0.617627	89.6422
GOTERM_CC_FAT	GO:0031981~nuclear lumen	18	10.2857	0.259557	ACTB, PABPN1, PRPF31, MCL1, NOL7, ACTN1, ZEB1, C19ORF33, PRPF19, KCTD10, ATF4, CASP3, JUN, SNRPB, UBB, ABL1, TBL1X, RERE	127	1450	12782	1.24939	1	0.713865	98.0032
GOTERM_CC_FAT	GO:0070013~intracellular organelle lumen	21	12	0.297972	BCKDHA, ACTB, PABPN1, PRPF31, MCL1, FARS2, NOL7, ACTN1, IDH3B, ZEB1, C19ORF33, PRPF19, KCTD10, CASP3, ATF4, JUN, SNRPB, UBB, ABL1, TBL1X, RERE	127	1779	12782	1.18806	1	0.73847	99.0023
Annotation Cluster 54	Enrichment Score: 0.7423114022659918
Category	Term	Count	%	PValue	Genes	List Total	Pop Hits	Pop Total	Fold Enrichment	Bonferroni	Benjamini	FDR
GOTERM_MF_FAT	GO:0030246~carbohydrate binding	8	4.57143	0.065111	LPHN2, PTPRC, APP, ENPP2, IGF2R, VCAN, PFKM, GYG1	131	354	12983	2.2397	1	0.749808	60.7797
GOTERM_MF_FAT	GO:0001871~pattern binding	4	2.28571	0.200463	PTPRC, APP, ENPP2, VCAN	131	154	12983	2.5742	1	0.917858	95.5406
GOTERM_MF_FAT	GO:0030247~polysaccharide binding	4	2.28571	0.200463	PTPRC, APP, ENPP2, VCAN	131	154	12983	2.5742	1	0.917858	95.5406
GOTERM_MF_FAT	GO:0005539~glycosaminoglycan binding	3	1.71429	0.410233	PTPRC, APP, VCAN	131	140	12983	2.12372	1	0.969782	99.9351
Annotation Cluster 55	Enrichment Score: 0.70406740245805
Category	Term	Count	%	PValue	Genes	List Total	Pop Hits	Pop Total	Fold Enrichment	Bonferroni	Benjamini	FDR
GOTERM_BP_FAT	GO:0048514~blood vessel morphogenesis	5	2.85714	0.15725	PDGFA, TNFRSF12A, JUN, RHOB, PRRX2	135	211	13528	2.37458	1	0.812423	94.2072
GOTERM_BP_FAT	GO:0001525~angiogenesis	4	2.28571	0.181255	PDGFA, TNFRSF12A, JUN, RHOB	135	148	13528	2.70831	1	0.83565	96.4196
GOTERM_BP_FAT	GO:0001568~blood vessel development	5	2.85714	0.225161	PDGFA, TNFRSF12A, JUN, RHOB, PRRX2	135	245	13528	2.04505	1	0.869728	98.5698
GOTERM_BP_FAT	GO:0001944~vasculature development	5	2.85714	0.237879	PDGFA, TNFRSF12A, JUN, RHOB, PRRX2	135	251	13528	1.99616	1	0.879366	98.9143
Annotation Cluster 56	Enrichment Score: 0.6908580720548189
Category	Term	Count	%	PValue	Genes	List Total	Pop Hits	Pop Total	Fold Enrichment	Bonferroni	Benjamini	FDR
GOTERM_BP_FAT	GO:0051051~negative regulation of transport	5	2.85714	0.0451665	GNAI2, PACSIN3, NPY1R, KCNA5, FLNA	135	135	13528	3.71139	1	0.645552	53.6769
GOTERM_BP_FAT	GO:0007188~G-protein signaling, coupled to cAMP nucleotide second messenger	4	2.28571	0.0522032	CRHR2, GNAI2, NPY1R, FLNA	135	85	13528	4.71564	1	0.668998	59.0446
GOTERM_BP_FAT	GO:0007193~inhibition of adenylate cyclase activity by G-protein signaling	3	1.71429	0.0594911	GNAI2, NPY1R, FLNA	135	40	13528	7.51556	1	0.67621	63.984
GOTERM_BP_FAT	GO:0019933~cAMP-mediated signaling	4	2.28571	0.0682151	CRHR2, GNAI2, NPY1R, FLNA	135	95	13528	4.21926	1	0.702227	69.1604
GOTERM_BP_FAT	GO:0031280~negative regulation of cyclase activity	3	1.71429	0.103058	GNAI2, NPY1R, FLNA	135	55	13528	5.46586	1	0.766811	83.6494
GOTERM_BP_FAT	GO:0051350~negative regulation of lyase activity	3	1.71429	0.103058	GNAI2, NPY1R, FLNA	135	55	13528	5.46586	1	0.766811	83.6494
GOTERM_BP_FAT	GO:0007194~negative regulation of adenylate cyclase activity	3	1.71429	0.103058	GNAI2, NPY1R, FLNA	135	55	13528	5.46586	1	0.766811	83.6494
GOTERM_BP_FAT	GO:0007187~G-protein signaling, coupled to cyclic nucleotide second messenger	4	2.28571	0.105918	CRHR2, GNAI2, NPY1R, FLNA	135	115	13528	3.48548	1	0.770723	84.4963
GOTERM_BP_FAT	GO:0019935~cyclic-nucleotide-mediated signaling	4	2.28571	0.138447	CRHR2, GNAI2, NPY1R, FLNA	135	130	13528	3.0833	1	0.802951	91.6352
GOTERM_BP_FAT	GO:0045761~regulation of adenylate cyclase activity	3	1.71429	0.246019	GNAI2, NPY1R, FLNA	135	96	13528	3.13148	1	0.885302	99.0921
GOTERM_BP_FAT	GO:0031279~regulation of cyclase activity	3	1.71429	0.257037	GNAI2, NPY1R, FLNA	135	99	13528	3.03659	1	0.89284	99.2894
GOTERM_BP_FAT	GO:0030817~regulation of cAMP biosynthetic process	3	1.71429	0.264387	GNAI2, NPY1R, FLNA	135	101	13528	2.97646	1	0.897158	99.3978
GOTERM_BP_FAT	GO:0051339~regulation of lyase activity	3	1.71429	0.264387	GNAI2, NPY1R, FLNA	135	101	13528	2.97646	1	0.897158	99.3978
GOTERM_BP_FAT	GO:0030814~regulation of cAMP metabolic process	3	1.71429	0.271739	GNAI2, NPY1R, FLNA	135	103	13528	2.91866	1	0.899068	99.4906
GOTERM_BP_FAT	GO:0030808~regulation of nucleotide biosynthetic process	3	1.71429	0.297437	GNAI2, NPY1R, FLNA	135	110	13528	2.73293	1	0.914553	99.7199
GOTERM_BP_FAT	GO:0030802~regulation of cyclic nucleotide biosynthetic process	3	1.71429	0.297437	GNAI2, NPY1R, FLNA	135	110	13528	2.73293	1	0.914553	99.7199
GOTERM_BP_FAT	GO:0030799~regulation of cyclic nucleotide metabolic process	3	1.71429	0.308416	GNAI2, NPY1R, FLNA	135	113	13528	2.66037	1	0.918914	99.7845
GOTERM_BP_FAT	GO:0006140~regulation of nucleotide metabolic process	3	1.71429	0.319362	GNAI2, NPY1R, FLNA	135	116	13528	2.59157	1	0.920385	99.8348
GOTERM_BP_FAT	GO:0019932~second-messenger-mediated signaling	4	2.28571	0.412477	CRHR2, GNAI2, NPY1R, FLNA	135	235	13528	1.70566	1	0.953773	99.9857
GOTERM_BP_FAT	GO:0007186~G-protein coupled receptor protein signaling pathway	7	4	0.970987	LPHN2, CRHR2, GNAI2, ENPP2, NPY1R, D4S234E, FLNA	135	1123	13528	0.624623	1	1	100
SP_PIR_KEYWORDS	transducer	4	2.28571	0.987003	LPHN2, CRHR2, GNAI2, NPY1R	175	874	19235	0.50304	1	0.999999	100
SP_PIR_KEYWORDS	g-protein coupled receptor	3	1.71429	0.995506	LPHN2, CRHR2, NPY1R	175	816	19235	0.404097	1	1	100
Annotation Cluster 57	Enrichment Score: 0.6669082139499919
Category	Term	Count	%	PValue	Genes	List Total	Pop Hits	Pop Total	Fold Enrichment	Bonferroni	Benjamini	FDR
GOTERM_BP_FAT	GO:0051329~interphase of mitotic cell cycle	4	2.28571	0.082437	APP, ABL1, GADD45A, FOXN3	135	103	13528	3.89155	1	0.717021	76.1279
GOTERM_BP_FAT	GO:0051325~interphase	4	2.28571	0.0880746	APP, ABL1, GADD45A, FOXN3	135	106	13528	3.78141	1	0.728206	78.456
GOTERM_BP_FAT	GO:0022402~cell cycle process	10	5.71429	0.108384	APP, ILK, MAPRE2, PSME3, UBB, ABL1, SESN2, GADD45A, FOXN3, MYH10	135	565	13528	1.77358	1	0.77033	85.193
GOTERM_BP_FAT	GO:0000278~mitotic cell cycle	7	4	0.161344	APP, MAPRE2, PSME3, UBB, ABL1, GADD45A, FOXN3	135	370	13528	1.89582	1	0.817209	94.6583
GOTERM_BP_FAT	GO:0007049~cell cycle	10	5.71429	0.362184	APP, ILK, MAPRE2, PSME3, UBB, ABL1, SESN2, GADD45A, FOXN3, MYH10	135	776	13528	1.29133	1	0.938556	99.944
GOTERM_BP_FAT	GO:0022403~cell cycle phase	5	2.85714	0.590266	APP, MAPRE2, ABL1, GADD45A, FOXN3	135	414	13528	1.21023	1	0.987626	100
SP_PIR_KEYWORDS	cell cycle	4	2.28571	0.790632	MAPRE2, PSME3, GADD45A, FOXN3	175	461	19235	0.953703	1	0.997092	100
Annotation Cluster 58	Enrichment Score: 0.6515007267763122
Category	Term	Count	%	PValue	Genes	List Total	Pop Hits	Pop Total	Fold Enrichment	Bonferroni	Benjamini	FDR
GOTERM_BP_FAT	GO:0032496~response to lipopolysaccharide	3	1.71429	0.177194	JUN, PRDX2, VLDLR	135	77	13528	3.90418	1	0.833525	96.1121
GOTERM_BP_FAT	GO:0002237~response to molecule of bacterial origin	3	1.71429	0.209501	JUN, PRDX2, VLDLR	135	86	13528	3.49561	1	0.862212	98.0044
GOTERM_BP_FAT	GO:0009617~response to bacterium	4	2.28571	0.299131	HIST1H2BC, JUN, PRDX2, VLDLR	135	193	13528	2.07684	1	0.915027	99.7309
Annotation Cluster 59	Enrichment Score: 0.5862619007568489
Category	Term	Count	%	PValue	Genes	List Total	Pop Hits	Pop Total	Fold Enrichment	Bonferroni	Benjamini	FDR
GOTERM_BP_FAT	GO:0032268~regulation of cellular protein metabolic process	9	5.14286	0.0987114	PTPRC, APP, PACSIN3, PDGFA, JUN, ITGA2, PSME3, UBB, TIMP1	135	474	13528	1.90267	1	0.754268	82.279
GOTERM_BP_FAT	GO:0032270~positive regulation of cellular protein metabolic process	4	2.28571	0.407161	PACSIN3, ITGA2, PSME3, UBB	135	233	13528	1.7203	1	0.952965	99.9834
GOTERM_BP_FAT	GO:0051247~positive regulation of protein metabolic process	4	2.28571	0.433591	PACSIN3, ITGA2, PSME3, UBB	135	243	13528	1.6495	1	0.960707	99.9922
Annotation Cluster 60	Enrichment Score: 0.5775251778752626
Category	Term	Count	%	PValue	Genes	List Total	Pop Hits	Pop Total	Fold Enrichment	Bonferroni	Benjamini	FDR
GOTERM_MF_FAT	GO:0017016~Ras GTPase binding	3	1.71429	0.231318	RAP1A, SYTL2, FLNA	131	91	12983	3.26726	1	0.933259	97.4197
GOTERM_MF_FAT	GO:0031267~small GTPase binding	3	1.71429	0.268424	RAP1A, SYTL2, FLNA	131	101	12983	2.94377	1	0.92574	98.703
GOTERM_MF_FAT	GO:0051020~GTPase binding	3	1.71429	0.298121	RAP1A, SYTL2, FLNA	131	109	12983	2.72771	1	0.937228	99.271
Annotation Cluster 61	Enrichment Score: 0.5683301847606742
Category	Term	Count	%	PValue	Genes	List Total	Pop Hits	Pop Total	Fold Enrichment	Bonferroni	Benjamini	FDR
GOTERM_BP_FAT	GO:0010647~positive regulation of cell communication	8	4.57143	0.0452859	PTPRC, ILK, PINK1, ITGA2, RELN, UBB, PRRX2, FLNA	135	329	13528	2.43665	1	0.641177	53.7733
GOTERM_BP_FAT	GO:0009967~positive regulation of signal transduction	5	2.85714	0.335001	PTPRC, ILK, RELN, PRRX2, FLNA	135	295	13528	1.69843	1	0.926891	99.8878
GOTERM_BP_FAT	GO:0010740~positive regulation of protein kinase cascade	3	1.71429	0.4947	PTPRC, ILK, FLNA	135	167	13528	1.80013	1	0.973133	99.9988
GOTERM_BP_FAT	GO:0010627~regulation of protein kinase cascade	3	1.71429	0.710113	PTPRC, ILK, FLNA	135	249	13528	1.20732	1	0.996907	100
Annotation Cluster 62	Enrichment Score: 0.5610052251745445
Category	Term	Count	%	PValue	Genes	List Total	Pop Hits	Pop Total	Fold Enrichment	Bonferroni	Benjamini	FDR
GOTERM_BP_FAT	GO:0051054~positive regulation of DNA metabolic process	3	1.71429	0.106209	PTPRC, PDGFA, JUN	135	56	13528	5.36825	1	0.768801	84.5799
GOTERM_BP_FAT	GO:0051052~regulation of DNA metabolic process	3	1.71429	0.312068	PTPRC, PDGFA, JUN	135	114	13528	2.63704	1	0.918211	99.8027
GOTERM_BP_FAT	GO:0031399~regulation of protein modification process	5	2.85714	0.335001	PTPRC, PDGFA, JUN, PSME3, UBB	135	295	13528	1.69843	1	0.926891	99.8878
GOTERM_BP_FAT	GO:0001932~regulation of protein amino acid phosphorylation	3	1.71429	0.513479	PTPRC, PDGFA, JUN	135	173	13528	1.7377	1	0.976538	99.9994
Annotation Cluster 63	Enrichment Score: 0.5296509811286327
Category	Term	Count	%	PValue	Genes	List Total	Pop Hits	Pop Total	Fold Enrichment	Bonferroni	Benjamini	FDR
GOTERM_BP_FAT	GO:0055114~oxidation reduction	10	5.71429	0.182935	BCKDHA, SEPX1, NDUFB11, NNT, KCNAB1, IDH3B, PRDX2, DPYD, AOC2, LOXL1	135	639	13528	1.56819	1	0.836929	96.5399
GOTERM_MF_FAT	GO:0048037~cofactor binding	5	2.85714	0.239352	MOCOS, NNT, IDH3B, DPYD, AOC2	131	249	12983	1.9901	1	0.921679	97.7704
SP_PIR_KEYWORDS	oxidoreductase	8	4.57143	0.247487	BCKDHA, SEPX1, NNT, IDH3B, PRDX2, DPYD, AOC2, LOXL1	175	562	19235	1.56462	1	0.895662	97.8041
GOTERM_MF_FAT	GO:0009055~electron carrier activity	4	2.28571	0.381492	NNT, IDH3B, DPYD, AOC2	131	221	12983	1.79379	1	0.965075	99.8743
GOTERM_MF_FAT	GO:0050662~coenzyme binding	3	1.71429	0.543719	NNT, IDH3B, DPYD	131	181	12983	1.64266	1	0.98902	99.9982
Annotation Cluster 64	Enrichment Score: 0.5274108409920214
Category	Term	Count	%	PValue	Genes	List Total	Pop Hits	Pop Total	Fold Enrichment	Bonferroni	Benjamini	FDR
GOTERM_MF_FAT	GO:0004857~enzyme inhibitor activity	6	3.42857	0.134584	APP, CASP3, SERPINE1, PPP1R14C, PPP1R14A, TIMP1	131	270	12983	2.20237	1	0.867142	86.5937
GOTERM_MF_FAT	GO:0004866~endopeptidase inhibitor activity	3	1.71429	0.427569	APP, SERPINE1, TIMP1	131	145	12983	2.05049	1	0.973627	99.9572
GOTERM_MF_FAT	GO:0030414~peptidase inhibitor activity	3	1.71429	0.454744	APP, SERPINE1, TIMP1	131	153	12983	1.94327	1	0.978179	99.9782
Annotation Cluster 65	Enrichment Score: 0.5089353616450243
Category	Term	Count	%	PValue	Genes	List Total	Pop Hits	Pop Total	Fold Enrichment	Bonferroni	Benjamini	FDR
GOTERM_BP_FAT	GO:0046907~intracellular transport	13	7.42857	0.0298172	PABPN1, KIF5B, TPM1, FLNA, APP, JUN, RHOB, AP3D1, SLC25A1, SYTL2, KDELR1, RERE, MYH10	135	657	13528	1.98279	1	0.574899	39.5893
GOTERM_BP_FAT	GO:0008104~protein localization	12	6.85714	0.257486	CUTA, TLN1, CHMP6, JUN, AP3D1, RHOB, ITGA2, SYTL2, RAB10, KDELR1, FLNA, RERE	135	882	13528	1.36337	1	0.89215	99.2965
GOTERM_BP_FAT	GO:0045184~establishment of protein localization	10	5.71429	0.352265	CHMP6, JUN, AP3D1, RHOB, ITGA2, SYTL2, RAB10, KDELR1, FLNA, RERE	135	769	13528	1.30309	1	0.934596	99.9276
GOTERM_BP_FAT	GO:0034613~cellular protein localization	6	3.42857	0.385292	JUN, AP3D1, SYTL2, KDELR1, FLNA, RERE	135	411	13528	1.46288	1	0.945634	99.9697
GOTERM_BP_FAT	GO:0070727~cellular macromolecule localization	6	3.42857	0.391214	JUN, AP3D1, SYTL2, KDELR1, FLNA, RERE	135	414	13528	1.45228	1	0.947494	99.9742
GOTERM_BP_FAT	GO:0006886~intracellular protein transport	5	2.85714	0.509583	JUN, AP3D1, SYTL2, KDELR1, RERE	135	374	13528	1.33967	1	0.975852	99.9993
GOTERM_BP_FAT	GO:0015031~protein transport	8	4.57143	0.635494	CHMP6, JUN, AP3D1, RHOB, SYTL2, RAB10, KDELR1, RERE	135	762	13528	1.05205	1	0.992236	100
SP_PIR_KEYWORDS	protein transport	5	2.85714	0.642535	CHMP6, AP3D1, RHOB, RAB10, KDELR1	175	485	19235	1.13314	1	0.988797	99.9999
Annotation Cluster 66	Enrichment Score: 0.4886415671755327
Category	Term	Count	%	PValue	Genes	List Total	Pop Hits	Pop Total	Fold Enrichment	Bonferroni	Benjamini	FDR
GOTERM_BP_FAT	GO:0048534~hemopoietic or lymphoid organ development	6	3.42857	0.116179	KLF6, PTPRC, PRDX2, DYRK3, SCAND1, TIMP1	135	260	13528	2.31248	1	0.775917	87.2071
GOTERM_BP_FAT	GO:0002520~immune system development	6	3.42857	0.139218	KLF6, PTPRC, PRDX2, DYRK3, SCAND1, TIMP1	135	276	13528	2.17842	1	0.79806	91.7591
GOTERM_BP_FAT	GO:0001775~cell activation	4	2.28571	0.543799	KLF6, PTPRC, PDGFA, PRDX2	135	287	13528	1.39662	1	0.982028	99.9998
GOTERM_BP_FAT	GO:0046649~lymphocyte activation	3	1.71429	0.589428	KLF6, PTPRC, PRDX2	135	199	13528	1.51066	1	0.987852	100
GOTERM_BP_FAT	GO:0045321~leukocyte activation	3	1.71429	0.695182	KLF6, PTPRC, PRDX2	135	242	13528	1.24224	1	0.996156	100
Annotation Cluster 67	Enrichment Score: 0.4863365172849341
Category	Term	Count	%	PValue	Genes	List Total	Pop Hits	Pop Total	Fold Enrichment	Bonferroni	Benjamini	FDR
GOTERM_BP_FAT	GO:0043009~chordate embryonic development	6	3.42857	0.23121	PRPF19, SFRP2, PRRX2, ZEB1, TPM1, MYH10	135	331	13528	1.81645	1	0.876289	98.7448
GOTERM_BP_FAT	GO:0009792~embryonic development ending in birth or egg hatching	6	3.42857	0.236683	PRPF19, SFRP2, PRRX2, ZEB1, TPM1, MYH10	135	334	13528	1.80013	1	0.879193	98.8856
GOTERM_BP_FAT	GO:0007423~sensory organ development	4	2.28571	0.396488	PDGFA, PRRX2, ZEB1, MYH10	135	229	13528	1.75035	1	0.949555	99.9777
GOTERM_BP_FAT	GO:0001701~in utero embryonic development	3	1.71429	0.522697	PRPF19, TPM1, MYH10	135	176	13528	1.70808	1	0.978201	99.9996
Annotation Cluster 68	Enrichment Score: 0.484957307740948
Category	Term	Count	%	PValue	Genes	List Total	Pop Hits	Pop Total	Fold Enrichment	Bonferroni	Benjamini	FDR
GOTERM_BP_FAT	GO:0033554~cellular response to stress	11	6.28571	0.0545818	NONO, PRPF19, CASP3, ATF4, JUN, PRDX2, VCAN, ABL1, TPM1, GADD45A, FOXN3	135	566	13528	1.94749	1	0.671216	60.7227
GOTERM_BP_FAT	GO:0006974~response to DNA damage stimulus	6	3.42857	0.31059	NONO, PRPF19, CASP3, ABL1, GADD45A, FOXN3	135	373	13528	1.61192	1	0.918835	99.7955
GOTERM_BP_FAT	GO:0006281~DNA repair	4	2.28571	0.536666	NONO, PRPF19, ABL1, GADD45A	135	284	13528	1.41137	1	0.980798	99.9997
SP_PIR_KEYWORDS	DNA damage	3	1.71429	0.555962	NONO, PRPF19, GADD45A	175	205	19235	1.6085	1	0.977923	99.9982
GOTERM_BP_FAT	GO:0006259~DNA metabolic process	5	2.85714	0.74341	NONO, PRPF19, CASP3, ABL1, GADD45A	135	506	13528	0.990192	1	0.998074	100
Annotation Cluster 69	Enrichment Score: 0.46058788134157796
Category	Term	Count	%	PValue	Genes	List Total	Pop Hits	Pop Total	Fold Enrichment	Bonferroni	Benjamini	FDR
GOTERM_CC_FAT	GO:0005578~proteinaceous extracellular matrix	6	3.42857	0.208644	COL21A1, VCAN, RELN, LOXL1, EMILIN1, TIMP1	127	320	12782	1.88711	1	0.660638	95.2526
SP_PIR_KEYWORDS	collagen	3	1.71429	0.212317	COL21A1, EMILIN1, TIMP1	175	95	19235	3.47098	1	0.871923	95.9448
GOTERM_CC_FAT	GO:0031012~extracellular matrix	6	3.42857	0.253849	COL21A1, VCAN, RELN, LOXL1, EMILIN1, TIMP1	127	345	12782	1.75036	1	0.716529	97.7932
SP_PIR_KEYWORDS	extracellular matrix	4	2.28571	0.372062	COL21A1, VCAN, RELN, EMILIN1	175	241	19235	1.8243	1	0.940892	99.8068
GOTERM_CC_FAT	GO:0044421~extracellular region part	10	5.71429	0.611651	COL21A1, PDGFA, IGFBP7, VCAN, RELN, LOXL1, EMILIN1, SLIT3, VLDLR, TIMP1	127	960	12782	1.04839	1	0.930707	99.9996
SP_PIR_KEYWORDS	Secreted	15	8.57143	0.673575	CRELD2, COL21A1, LYPD6, ENPP2, PDGFA, IGFBP7, CSNK2B, TIMP1, SLIT3, EMILIN1, SFRP2, SERPINE1, VCAN, RELN, LOXL1	175	1689	19235	0.976148	1	0.991385	100
Annotation Cluster 70	Enrichment Score: 0.41025485081127855
Category	Term	Count	%	PValue	Genes	List Total	Pop Hits	Pop Total	Fold Enrichment	Bonferroni	Benjamini	FDR
GOTERM_BP_FAT	GO:0016567~protein ubiquitination	3	1.71429	0.330267	PRPF19, UBB, UBE2L3	135	119	13528	2.52624	1	0.925959	99.8737
GOTERM_BP_FAT	GO:0032446~protein modification by small protein conjugation	3	1.71429	0.376894	PRPF19, UBB, UBE2L3	135	132	13528	2.27744	1	0.944923	99.962
GOTERM_BP_FAT	GO:0070647~protein modification by small protein conjugation or removal	3	1.71429	0.472228	PRPF19, UBB, UBE2L3	135	160	13528	1.87889	1	0.969667	99.9976
Annotation Cluster 71	Enrichment Score: 0.4053942012809034
Category	Term	Count	%	PValue	Genes	List Total	Pop Hits	Pop Total	Fold Enrichment	Bonferroni	Benjamini	FDR
SP_PIR_KEYWORDS	mrna processing	5	2.85714	0.209819	NONO, PABPN1, PRPF19, PRPF31, SNRPB	175	260	19235	2.11374	1	0.875792	95.7686
GOTERM_BP_FAT	GO:0006397~mRNA processing	6	3.42857	0.213251	NONO, PABPN1, PRPF19, PRPF31, APP, SNRPB	135	321	13528	1.87304	1	0.861711	98.1563
SP_PIR_KEYWORDS	mrna splicing	4	2.28571	0.293541	NONO, PRPF19, PRPF31, SNRPB	175	209	19235	2.10362	1	0.903843	99.0597
SP_PIR_KEYWORDS	Spliceosome	3	1.71429	0.295893	PRPF19, PRPF31, SNRPB	175	120	19235	2.74786	1	0.901131	99.1009
GOTERM_BP_FAT	GO:0016071~mRNA metabolic process	6	3.42857	0.304764	NONO, PABPN1, PRPF19, PRPF31, APP, SNRPB	135	370	13528	1.62498	1	0.917806	99.7648
GOTERM_BP_FAT	GO:0008380~RNA splicing	5	2.85714	0.310297	NONO, PABPN1, PRPF19, PRPF31, SNRPB	135	284	13528	1.76421	1	0.919505	99.7941
GOTERM_CC_FAT	GO:0005681~spliceosome	3	1.71429	0.374668	PRPF19, PRPF31, SNRPB	127	132	12782	2.2874	1	0.796064	99.7789
GOTERM_BP_FAT	GO:0000375~RNA splicing, via transesterification reactions	3	1.71429	0.449173	PABPN1, PRPF31, SNRPB	135	153	13528	1.96485	1	0.964761	99.9951
GOTERM_BP_FAT	GO:0000377~RNA splicing, via transesterification reactions with bulged adenosine as nucleophile	3	1.71429	0.449173	PABPN1, PRPF31, SNRPB	135	153	13528	1.96485	1	0.964761	99.9951
GOTERM_BP_FAT	GO:0000398~nuclear mRNA splicing, via spliceosome	3	1.71429	0.449173	PABPN1, PRPF31, SNRPB	135	153	13528	1.96485	1	0.964761	99.9951
GOTERM_BP_FAT	GO:0006396~RNA processing	7	4	0.458831	NONO, PABPN1, PRPF19, PRPF31, APP, FARS2, SNRPB	135	547	13528	1.28236	1	0.967686	99.9964
KEGG_PATHWAY	hsa03040:Spliceosome	3	1.71429	0.474039	PRPF19, PRPF31, SNRPB	65	126	5085	1.86264	1	0.925779	99.9005
GOTERM_CC_FAT	GO:0030529~ribonucleoprotein complex	6	3.42857	0.577593	PABPN1, PRPF19, ACTB, PRPF31, SNRPB, UBB	127	515	12782	1.17257	1	0.919219	99.9987
SP_PIR_KEYWORDS	rna-binding	5	2.85714	0.723626	NONO, PABPN1, PRPF31, CPNE1, SNRPB	175	540	19235	1.01772	1	0.99397	100
GOTERM_MF_FAT	GO:0003723~RNA binding	7	4	0.731668	NONO, PABPN1, PRPF31, FARS2, CPNE1, SNRPB, SCAND1	131	718	12983	0.966223	1	0.997106	100
Annotation Cluster 72	Enrichment Score: 0.40212452732058135
Category	Term	Count	%	PValue	Genes	List Total	Pop Hits	Pop Total	Fold Enrichment	Bonferroni	Benjamini	FDR
GOTERM_MF_FAT	GO:0048037~cofactor binding	5	2.85714	0.239352	MOCOS, NNT, IDH3B, DPYD, AOC2	131	249	12983	1.9901	1	0.921679	97.7704
GOTERM_BP_FAT	GO:0006732~coenzyme metabolic process	3	1.71429	0.449173	MOCOS, NNT, IDH3B	135	153	13528	1.96485	1	0.964761	99.9951
GOTERM_BP_FAT	GO:0051186~cofactor metabolic process	3	1.71429	0.57833	MOCOS, NNT, IDH3B	135	195	13528	1.54165	1	0.986894	99.9999
Annotation Cluster 73	Enrichment Score: 0.3845009562274133
Category	Term	Count	%	PValue	Genes	List Total	Pop Hits	Pop Total	Fold Enrichment	Bonferroni	Benjamini	FDR
GOTERM_MF_FAT	GO:0004713~protein tyrosine kinase activity	5	2.85714	0.0853756	FGFR3, IGF2R, ILK, DYRK3, ABL1	131	166	12983	2.98515	1	0.795271	71.0797
GOTERM_BP_FAT	GO:0006468~protein amino acid phosphorylation	11	6.28571	0.125451	PTPRC, APP, FGFR3, GNAI2, ILK, PINK1, PRDX2, DYRK3, RELN, STK17A, ABL1	135	667	13528	1.6526	1	0.787681	89.2672
SP_PIR_KEYWORDS	kinase	10	5.71429	0.172164	CKM, FGFR3, ILK, CSNK2B, PINK1, DYRK3, STK17A, PFKM, ABL1, CIB2	175	688	19235	1.59759	1	0.839645	92.0932
GOTERM_MF_FAT	GO:0004672~protein kinase activity	9	5.14286	0.26156	FGFR3, IGF2R, ILK, CSNK2B, PINK1, DYRK3, RELN, STK17A, ABL1	131	606	12983	1.47188	1	0.928253	98.5232
SP_PIR_KEYWORDS	nucleotide-binding	19	10.8571	0.264834	ACTB, FGFR3, GNAI2, GIMAP6, KIF5B, FARS2, PINK1, STK17A, PFKM, UBE2L3, CCT7, CKM, ILK, RAP1A, RHOB, DYRK3, ABL1, RAB10, MYH10	175	1686	19235	1.23865	1	0.902334	98.3946
SP_PIR_KEYWORDS	tyrosine-protein kinase	3	1.71429	0.26575	FGFR3, DYRK3, ABL1	175	111	19235	2.97066	1	0.897718	98.4213
GOTERM_BP_FAT	GO:0016310~phosphorylation	11	6.28571	0.269191	PTPRC, APP, FGFR3, GNAI2, ILK, PINK1, PRDX2, DYRK3, RELN, STK17A, ABL1	135	800	13528	1.37785	1	0.897598	99.4601
GOTERM_BP_FAT	GO:0000165~MAPKKK cascade	4	2.28571	0.274844	PTPRC, FGFR3, GNAI2, PRDX2	135	184	13528	2.17842	1	0.89998	99.5255
GOTERM_BP_FAT	GO:0007243~protein kinase cascade	6	3.42857	0.304764	PTPRC, FGFR3, GNAI2, PINK1, PRDX2, STK17A	135	370	13528	1.62498	1	0.917806	99.7648
SMART	SM00219:TyrKc	3	1.71429	0.307922	FGFR3, ILK, ABL1	87	118	9079	2.65313	1	0.993229	98.2502
INTERPRO	IPR001245:Tyrosine protein kinase	3	1.71429	0.308326	FGFR3, ILK, ABL1	159	118	16659	2.66374	1	0.999966	99.4352
GOTERM_BP_FAT	GO:0006796~phosphate metabolic process	12	6.85714	0.369712	PTPRC, APP, FGFR3, GNAI2, ENPP2, ILK, PINK1, PRDX2, DYRK3, RELN, STK17A, ABL1	135	973	13528	1.23586	1	0.942254	99.954
GOTERM_BP_FAT	GO:0006793~phosphorus metabolic process	12	6.85714	0.369712	PTPRC, APP, FGFR3, GNAI2, ENPP2, ILK, PINK1, PRDX2, DYRK3, RELN, STK17A, ABL1	135	973	13528	1.23586	1	0.942254	99.954
UP_SEQ_FEATURE	binding site:ATP	7	4	0.372244	CKM, FGFR3, ILK, PINK1, DYRK3, STK17A, ABL1	175	542	19113	1.41055	1	0.999998	99.9066
UP_SEQ_FEATURE	active site:Proton acceptor	8	4.57143	0.392056	FGFR3, PINK1, DYRK3, STK17A, PFKM, ABL1, AOC2, ENO1	175	658	19113	1.32787	1	0.999998	99.9422
GOTERM_MF_FAT	GO:0000166~nucleotide binding	25	14.2857	0.396946	FGFR3, GNAI2, FARS2, PINK1, STK17A, NONO, ILK, RHOB, DYRK3, ACTB, PABPN1, GIMAP6, KIF5B, IDH3B, PFKM, UBE2L3, CCT7, CKM, NNT, CPNE1, RAP1A, DPYD, RAB10, ABL1, MYH10	131	2245	12983	1.10364	1	0.96694	99.9116
SP_PIR_KEYWORDS	atp-binding	14	8	0.423354	ACTB, FGFR3, KIF5B, FARS2, PINK1, PFKM, STK17A, UBE2L3, CCT7, CKM, ILK, DYRK3, ABL1, MYH10	175	1326	19235	1.16048	1	0.952525	99.9385
UP_SEQ_FEATURE	domain:Protein kinase	6	3.42857	0.424554	FGFR3, ILK, PINK1, DYRK3, STK17A, ABL1	175	469	19113	1.39723	1	0.999999	99.9746
INTERPRO	IPR017441:Protein kinase, ATP binding site	6	3.42857	0.433639	FGFR3, ILK, PINK1, DYRK3, STK17A, ABL1	159	455	16659	1.38163	1	0.999993	99.9659
INTERPRO	IPR000719:Protein kinase, core	6	3.42857	0.472513	FGFR3, ILK, PINK1, DYRK3, STK17A, ABL1	159	476	16659	1.32068	1	0.999995	99.9874
GOTERM_BP_FAT	GO:0007242~intracellular signaling cascade	14	8	0.476973	PTPRC, FGFR3, GNAI2, PINK1, PRDX2, NPY1R, STK17A, FLNA, FOXN3, CRHR2, RAP1A, RHOB, ABL1, RAB10	135	1256	13528	1.11696	1	0.970761	99.9979
UP_SEQ_FEATURE	nucleotide phosphate-binding region:ATP	10	5.71429	0.515129	CKM, FGFR3, KIF5B, ILK, PINK1, DYRK3, STK17A, PFKM, ABL1, MYH10	175	962	19113	1.13531	1	1	99.9981
GOTERM_MF_FAT	GO:0017076~purine nucleotide binding	20	11.4286	0.558433	ACTB, FGFR3, GNAI2, GIMAP6, KIF5B, FARS2, PINK1, STK17A, PFKM, UBE2L3, CCT7, CKM, ILK, RAP1A, RHOB, DYRK3, DPYD, ABL1, RAB10, MYH10	131	1918	12983	1.03344	1	0.990265	99.9988
GOTERM_MF_FAT	GO:0032553~ribonucleotide binding	19	10.8571	0.57728	ACTB, FGFR3, GNAI2, GIMAP6, KIF5B, FARS2, PINK1, STK17A, PFKM, UBE2L3, CCT7, CKM, ILK, RAP1A, RHOB, DYRK3, ABL1, RAB10, MYH10	131	1836	12983	1.02562	1	0.990683	99.9994
GOTERM_MF_FAT	GO:0032555~purine ribonucleotide binding	19	10.8571	0.57728	ACTB, FGFR3, GNAI2, GIMAP6, KIF5B, FARS2, PINK1, STK17A, PFKM, UBE2L3, CCT7, CKM, ILK, RAP1A, RHOB, DYRK3, ABL1, RAB10, MYH10	131	1836	12983	1.02562	1	0.990683	99.9994
GOTERM_MF_FAT	GO:0004674~protein serine/threonine kinase activity	5	2.85714	0.628976	ILK, CSNK2B, PINK1, DYRK3, STK17A	131	430	12983	1.15241	1	0.99431	99.9999
GOTERM_MF_FAT	GO:0001883~purine nucleoside binding	16	9.14286	0.648842	ACTB, FGFR3, KIF5B, FARS2, PINK1, PFKM, STK17A, UBE2L3, CCT7, CKM, ILK, RHOB, DYRK3, DPYD, ABL1, MYH10	131	1601	12983	0.99045	1	0.994732	100
INTERPRO	IPR008271:Serine/threonine protein kinase, active site	4	2.28571	0.656106	ILK, PINK1, DYRK3, STK17A	159	354	16659	1.18388	1	1	100
GOTERM_MF_FAT	GO:0001882~nucleoside binding	16	9.14286	0.659599	ACTB, FGFR3, KIF5B, FARS2, PINK1, PFKM, STK17A, UBE2L3, CCT7, CKM, ILK, RHOB, DYRK3, DPYD, ABL1, MYH10	131	1612	12983	0.983691	1	0.994133	100
SP_PIR_KEYWORDS	serine/threonine-protein kinase	4	2.28571	0.673124	ILK, PINK1, DYRK3, STK17A	175	381	19235	1.15396	1	0.991888	100
GOTERM_MF_FAT	GO:0030554~adenyl nucleotide binding	15	8.57143	0.724701	ACTB, FGFR3, KIF5B, FARS2, PINK1, PFKM, STK17A, UBE2L3, CCT7, CKM, ILK, DYRK3, DPYD, ABL1, MYH10	131	1577	12983	0.942678	1	0.997162	100
GOTERM_MF_FAT	GO:0005524~ATP binding	14	8	0.730407	ACTB, FGFR3, KIF5B, FARS2, PINK1, PFKM, STK17A, UBE2L3, CCT7, CKM, ILK, DYRK3, ABL1, MYH10	131	1477	12983	0.939402	1	0.997236	100
GOTERM_MF_FAT	GO:0032559~adenyl ribonucleotide binding	14	8	0.748044	ACTB, FGFR3, KIF5B, FARS2, PINK1, PFKM, STK17A, UBE2L3, CCT7, CKM, ILK, DYRK3, ABL1, MYH10	131	1497	12983	0.926851	1	0.997656	100
INTERPRO	IPR017442:Serine/threonine protein kinase-related	3	1.71429	0.857938	PINK1, DYRK3, STK17A	159	359	16659	0.875545	1	1	100
SP_PIR_KEYWORDS	transferase	10	5.71429	0.891127	CKM, FGFR3, B3GALT2, ILK, PINK1, DYRK3, STK17A, PFKM, GYG1, ABL1	175	1394	19235	0.788481	1	0.999476	100
Annotation Cluster 74	Enrichment Score: 0.3761101822194086
Category	Term	Count	%	PValue	Genes	List Total	Pop Hits	Pop Total	Fold Enrichment	Bonferroni	Benjamini	FDR
GOTERM_MF_FAT	GO:0003712~transcription cofactor activity	6	3.42857	0.298817	CUTA, HIRA, ZEB1, TBL1X, SCAND1, ENO1	131	363	12983	1.63813	1	0.934228	99.2809
GOTERM_MF_FAT	GO:0016563~transcription activator activity	6	3.42857	0.392128	CUTA, KLF6, ATF4, ZEB1, TBL1X, SCAND1	131	410	12983	1.45034	1	0.967113	99.9012
GOTERM_MF_FAT	GO:0003713~transcription coactivator activity	3	1.71429	0.635091	CUTA, ZEB1, SCAND1	131	214	12983	1.38935	1	0.994408	99.9999
Annotation Cluster 75	Enrichment Score: 0.3734247306189816
Category	Term	Count	%	PValue	Genes	List Total	Pop Hits	Pop Total	Fold Enrichment	Bonferroni	Benjamini	FDR
GOTERM_MF_FAT	GO:0008134~transcription factor binding	11	6.28571	0.0332198	CUTA, DIP2C, ENPP2, JUN, HIRA, CSNK2B, ZEB1, TBL1X, SCAND1, FLNA, ENO1	131	513	12983	2.1251	0.999998	0.733121	37.4786
GOTERM_MF_FAT	GO:0003714~transcription corepressor activity	4	2.28571	0.177714	HIRA, ZEB1, TBL1X, ENO1	131	145	12983	2.73398	1	0.908444	93.4134
GOTERM_BP_FAT	GO:0010605~negative regulation of macromolecule metabolic process	11	6.28571	0.191652	PTPRC, JUN, PSME3, UBB, ZEB1, TBL1X, FOXN3, FLNA, DNAJB6, TIMP1, ENO1	135	734	13528	1.50175	1	0.843593	97.1058
GOTERM_MF_FAT	GO:0016564~transcription repressor activity	6	3.42857	0.21042	HIRA, ZEB1, TBL1X, FOXN3, DNAJB6, ENO1	131	316	12983	1.88178	1	0.917638	96.2536
GOTERM_MF_FAT	GO:0003712~transcription cofactor activity	6	3.42857	0.298817	CUTA, HIRA, ZEB1, TBL1X, SCAND1, ENO1	131	363	12983	1.63813	1	0.934228	99.2809
GOTERM_BP_FAT	GO:0045892~negative regulation of transcription, DNA-dependent	5	2.85714	0.471084	ZEB1, TBL1X, FOXN3, DNAJB6, ENO1	135	356	13528	1.40741	1	0.969688	99.9975
GOTERM_BP_FAT	GO:0051253~negative regulation of RNA metabolic process	5	2.85714	0.484044	ZEB1, TBL1X, FOXN3, DNAJB6, ENO1	135	362	13528	1.38408	1	0.971079	99.9984
SP_PIR_KEYWORDS	repressor	5	2.85714	0.556689	HIRA, ZEB1, FOXN3, RERE, ENO1	175	435	19235	1.26338	1	0.976806	99.9982
GOTERM_BP_FAT	GO:0031327~negative regulation of cellular biosynthetic process	6	3.42857	0.657526	PDGFA, ZEB1, TBL1X, FOXN3, DNAJB6, ENO1	135	561	13528	1.07174	1	0.99406	100
GOTERM_MF_FAT	GO:0030528~transcription regulator activity	15	8.57143	0.6636	HMGN1, CUTA, KLF6, HIRA, PRRX2, ZEB1, FOXN3, ATF4, JUN, UBB, TBL1X, SCAND1, RERE, DNAJB6, ENO1	131	1512	12983	0.983203	1	0.994097	100
GOTERM_BP_FAT	GO:0016481~negative regulation of transcription	5	2.85714	0.671205	ZEB1, TBL1X, FOXN3, DNAJB6, ENO1	135	459	13528	1.09158	1	0.994864	100
GOTERM_BP_FAT	GO:0009890~negative regulation of biosynthetic process	6	3.42857	0.675818	PDGFA, ZEB1, TBL1X, FOXN3, DNAJB6, ENO1	135	573	13528	1.04929	1	0.995116	100
GOTERM_BP_FAT	GO:0010629~negative regulation of gene expression	5	2.85714	0.740597	ZEB1, TBL1X, FOXN3, DNAJB6, ENO1	135	504	13528	0.994121	1	0.998013	100
GOTERM_BP_FAT	GO:0000122~negative regulation of transcription from RNA polymerase II promoter	3	1.71429	0.743859	ZEB1, TBL1X, ENO1	135	266	13528	1.13016	1	0.998053	100
GOTERM_BP_FAT	GO:0045934~negative regulation of nucleobase, nucleoside, nucleotide and nucleic acid metabolic process	5	2.85714	0.75171	ZEB1, TBL1X, FOXN3, DNAJB6, ENO1	135	512	13528	0.978588	1	0.99828	100
GOTERM_BP_FAT	GO:0051172~negative regulation of nitrogen compound metabolic process	5	2.85714	0.761135	ZEB1, TBL1X, FOXN3, DNAJB6, ENO1	135	519	13528	0.965389	1	0.99853	100
GOTERM_BP_FAT	GO:0010558~negative regulation of macromolecule biosynthetic process	5	2.85714	0.796107	ZEB1, TBL1X, FOXN3, DNAJB6, ENO1	135	547	13528	0.915973	1	0.99927	100
Annotation Cluster 76	Enrichment Score: 0.3698772898994944
Category	Term	Count	%	PValue	Genes	List Total	Pop Hits	Pop Total	Fold Enrichment	Bonferroni	Benjamini	FDR
UP_SEQ_FEATURE	short sequence motif:Effector region	3	1.71429	0.214326	RHOB, RAP1A, RAB10	175	95	19113	3.44896	1	0.999978	97.3059
UP_SEQ_FEATURE	nucleotide phosphate-binding region:GTP	5	2.85714	0.282797	GNAI2, GIMAP6, RHOB, RAP1A, RAB10	175	295	19113	1.85114	1	0.999974	99.3128
INTERPRO	IPR013753:Ras	3	1.71429	0.332701	RHOB, RAP1A, RAB10	159	125	16659	2.51457	1	0.999975	99.6588
SP_PIR_KEYWORDS	gtp-binding	5	2.85714	0.347356	GNAI2, GIMAP6, RHOB, RAP1A, RAB10	175	329	19235	1.67043	1	0.929043	99.6756
INTERPRO	IPR001806:Ras GTPase	3	1.71429	0.367081	RHOB, RAP1A, RAB10	159	135	16659	2.3283	1	0.999976	99.8376
SP_PIR_KEYWORDS	prenylation	3	1.71429	0.408632	RHOB, RAP1A, RAB10	175	156	19235	2.11374	1	0.948226	99.9137
INTERPRO	IPR005225:Small GTP-binding protein	3	1.71429	0.464554	RHOB, RAP1A, RAB10	159	167	16659	1.88216	1	0.999996	99.9845
GOTERM_MF_FAT	GO:0005525~GTP binding	5	2.85714	0.513954	GNAI2, GIMAP6, RHOB, RAP1A, RAB10	131	372	12983	1.33208	1	0.987816	99.9956
GOTERM_MF_FAT	GO:0019001~guanyl nucleotide binding	5	2.85714	0.534954	GNAI2, GIMAP6, RHOB, RAP1A, RAB10	131	382	12983	1.29721	1	0.989281	99.9976
GOTERM_MF_FAT	GO:0032561~guanyl ribonucleotide binding	5	2.85714	0.534954	GNAI2, GIMAP6, RHOB, RAP1A, RAB10	131	382	12983	1.29721	1	0.989281	99.9976
GOTERM_MF_FAT	GO:0003924~GTPase activity	3	1.71429	0.627405	GNAI2, RHOB, RAP1A	131	211	12983	1.4091	1	0.994574	99.9999
GOTERM_BP_FAT	GO:0007264~small GTPase mediated signal transduction	3	1.71429	0.808835	RHOB, RAP1A, RAB10	135	305	13528	0.985647	1	0.999443	100
Annotation Cluster 77	Enrichment Score: 0.3695452406750561
Category	Term	Count	%	PValue	Genes	List Total	Pop Hits	Pop Total	Fold Enrichment	Bonferroni	Benjamini	FDR
GOTERM_BP_FAT	GO:0032268~regulation of cellular protein metabolic process	9	5.14286	0.0987114	PTPRC, APP, PACSIN3, PDGFA, JUN, ITGA2, PSME3, UBB, TIMP1	135	474	13528	1.90267	1	0.754268	82.279
GOTERM_BP_FAT	GO:0010604~positive regulation of macromolecule metabolic process	13	7.42857	0.142242	BCKDHA, PTPRC, KLF6, PDGFA, ITGA2, ZEB1, APP, ATF4, PACSIN3, JUN, PSME3, UBB, TBL1X	135	857	13528	1.52007	1	0.79664	92.228
GOTERM_BP_FAT	GO:0045935~positive regulation of nucleobase, nucleoside, nucleotide and nucleic acid metabolic process	10	5.71429	0.166228	BCKDHA, KLF6, PTPRC, APP, ATF4, PDGFA, JUN, UBB, ZEB1, TBL1X	135	624	13528	1.60589	1	0.823401	95.1533
GOTERM_BP_FAT	GO:0051173~positive regulation of nitrogen compound metabolic process	10	5.71429	0.188668	BCKDHA, KLF6, PTPRC, APP, ATF4, PDGFA, JUN, UBB, ZEB1, TBL1X	135	644	13528	1.55602	1	0.840169	96.9227
GOTERM_BP_FAT	GO:0010557~positive regulation of macromolecule biosynthetic process	10	5.71429	0.200371	BCKDHA, KLF6, APP, ATF4, PDGFA, JUN, ITGA2, UBB, ZEB1, TBL1X	135	654	13528	1.53222	1	0.851369	97.584
GOTERM_MF_FAT	GO:0016564~transcription repressor activity	6	3.42857	0.21042	HIRA, ZEB1, TBL1X, FOXN3, DNAJB6, ENO1	131	316	12983	1.88178	1	0.917638	96.2536
GOTERM_BP_FAT	GO:0031328~positive regulation of cellular biosynthetic process	10	5.71429	0.238501	BCKDHA, KLF6, APP, ATF4, PDGFA, JUN, ITGA2, UBB, ZEB1, TBL1X	135	685	13528	1.46288	1	0.878832	98.929
GOTERM_BP_FAT	GO:0009891~positive regulation of biosynthetic process	10	5.71429	0.251339	BCKDHA, KLF6, APP, ATF4, PDGFA, JUN, ITGA2, UBB, ZEB1, TBL1X	135	695	13528	1.44183	1	0.888937	99.193
GOTERM_MF_FAT	GO:0003690~double-stranded DNA binding	3	1.71429	0.253561	KLF6, JUN, ZEB1	131	97	12983	3.06516	1	0.925633	98.2845
GOTERM_BP_FAT	GO:0045944~positive regulation of transcription from RNA polymerase II promoter	6	3.42857	0.306704	KLF6, APP, ATF4, JUN, ZEB1, TBL1X	135	371	13528	1.6206	1	0.918455	99.7755
GOTERM_BP_FAT	GO:0045941~positive regulation of transcription	8	4.57143	0.325825	BCKDHA, KLF6, APP, ATF4, JUN, UBB, ZEB1, TBL1X	135	564	13528	1.42138	1	0.924392	99.859
GOTERM_BP_FAT	GO:0045893~positive regulation of transcription, DNA-dependent	7	4	0.334725	BCKDHA, KLF6, APP, ATF4, JUN, ZEB1, TBL1X	135	477	13528	1.47055	1	0.9275	99.887
GOTERM_BP_FAT	GO:0051254~positive regulation of RNA metabolic process	7	4	0.341781	BCKDHA, KLF6, APP, ATF4, JUN, ZEB1, TBL1X	135	481	13528	1.45832	1	0.928438	99.9054
GOTERM_BP_FAT	GO:0010628~positive regulation of gene expression	8	4.57143	0.353284	BCKDHA, KLF6, APP, ATF4, JUN, UBB, ZEB1, TBL1X	135	581	13528	1.37979	1	0.934509	99.9295
GOTERM_MF_FAT	GO:0016563~transcription activator activity	6	3.42857	0.392128	CUTA, KLF6, ATF4, ZEB1, TBL1X, SCAND1	131	410	12983	1.45034	1	0.967113	99.9012
GOTERM_MF_FAT	GO:0043566~structure-specific DNA binding	3	1.71429	0.427569	KLF6, JUN, ZEB1	131	145	12983	2.05049	1	0.973627	99.9572
GOTERM_BP_FAT	GO:0006357~regulation of transcription from RNA polymerase II promoter	9	5.14286	0.432151	KLF6, APP, ATF4, JUN, HIRA, ZEB1, ABL1, TBL1X, ENO1	135	727	13528	1.24053	1	0.960613	99.9919
GOTERM_CC_FAT	GO:0044451~nucleoplasm part	7	4	0.468261	ACTB, PRPF31, ATF4, JUN, ZEB1, TBL1X, RERE	127	555	12782	1.2694	1	0.865385	99.9732
SP_PIR_KEYWORDS	activator	6	3.42857	0.508477	NONO, KLF6, MAMSTR, ATF4, ZEB1, TBL1X	175	520	19235	1.26824	1	0.971311	99.9928
GOTERM_MF_FAT	GO:0043565~sequence-specific DNA binding	7	4	0.571702	ATF4, JUN, PRRX2, ZEB1, TBL1X, FOXN3, RERE	131	607	12983	1.14291	1	0.990624	99.9992
GOTERM_CC_FAT	GO:0005667~transcription factor complex	3	1.71429	0.616324	ATF4, JUN, ZEB1	127	210	12782	1.4378	1	0.931015	99.9996
GOTERM_MF_FAT	GO:0003700~transcription factor activity	10	5.71429	0.649035	KLF6, ATF4, JUN, HIRA, PRRX2, ZEB1, SCAND1, FOXN3, RERE, ENO1	131	975	12983	1.01648	1	0.994385	100
GOTERM_MF_FAT	GO:0030528~transcription regulator activity	15	8.57143	0.6636	HMGN1, CUTA, KLF6, HIRA, PRRX2, ZEB1, FOXN3, ATF4, JUN, UBB, TBL1X, SCAND1, RERE, DNAJB6, ENO1	131	1512	12983	0.983203	1	0.994097	100
SP_PIR_KEYWORDS	nucleus	36	20.5714	0.779403	HMGN1, SEPX1, MCL1, CTDSPL, HIRA, ZEB1, PRRX2, STK17A, PTMA, PRPF19, NONO, MAMSTR, RHOB, DYRK3, ENO1, PABPN1, PRPF31, KLF6, HIST1H2BC, PCIF1, NOL7, DYNLT3, FOXN3, C19ORF33, KCTD10, ATF4, JUN, SNRPB, CPNE1, PSME3, UBB, ABL1, TBL1X, SCAND1, RERE, DNAJB6	175	4283	19235	0.923865	1	0.9967	100
GOTERM_BP_FAT	GO:0006355~regulation of transcription, DNA-dependent	15	8.57143	0.853079	BCKDHA, KLF6, HIRA, PRRX2, ZEB1, FOXN3, APP, ATF4, JUN, ABL1, TBL1X, SCAND1, RERE, DNAJB6, ENO1	135	1773	13528	0.847778	1	0.999813	100
GOTERM_BP_FAT	GO:0051252~regulation of RNA metabolic process	15	8.57143	0.874475	BCKDHA, KLF6, HIRA, PRRX2, ZEB1, FOXN3, APP, ATF4, JUN, ABL1, TBL1X, SCAND1, RERE, DNAJB6, ENO1	135	1813	13528	0.829074	1	0.999905	100
GOTERM_MF_FAT	GO:0003677~DNA binding	18	10.2857	0.946698	HMGN1, KLF6, HIST1H2BC, HIRA, PRRX2, ZEB1, FOXN3, NONO, PRPF19, APP, ATF4, JUN, ABL1, TBL1X, SCAND1, RERE, DNAJB6, ENO1	131	2331	12983	0.765304	1	0.999996	100
GOTERM_BP_FAT	GO:0045449~regulation of transcription	20	11.4286	0.949668	BCKDHA, KLF6, HIRA, PRDX2, PRRX2, ZEB1, FOXN3, FLNA, NONO, MAMSTR, APP, ATF4, JUN, UBB, ABL1, TBL1X, SCAND1, RERE, DNAJB6, ENO1	135	2601	13528	0.77053	1	0.999998	100
SP_PIR_KEYWORDS	dna-binding	11	6.28571	0.978215	NONO, HMGN1, PRPF19, KLF6, HIST1H2BC, ATF4, JUN, PRRX2, ZEB1, FOXN3, ENO1	175	1868	19235	0.647247	1	0.999997	100
SP_PIR_KEYWORDS	transcription regulation	11	6.28571	0.990651	NONO, KLF6, MAMSTR, ATF4, JUN, HIRA, ZEB1, TBL1X, FOXN3, RERE, ENO1	175	2026	19235	0.596771	1	1	100
SP_PIR_KEYWORDS	Transcription	11	6.28571	0.992733	NONO, KLF6, MAMSTR, ATF4, JUN, HIRA, ZEB1, TBL1X, FOXN3, RERE, ENO1	175	2071	19235	0.583804	1	1	100
GOTERM_BP_FAT	GO:0006350~transcription	12	6.85714	0.996056	NONO, KLF6, MAMSTR, ATF4, JUN, HIRA, ZEB1, TBL1X, PTMA, FOXN3, RERE, ENO1	135	2101	13528	0.572341	1	1	100
Annotation Cluster 78	Enrichment Score: 0.35367141352459003
Category	Term	Count	%	PValue	Genes	List Total	Pop Hits	Pop Total	Fold Enrichment	Bonferroni	Benjamini	FDR
GOTERM_CC_FAT	GO:0044459~plasma membrane part	33	18.8571	0.0129234	TLN1, FGFR3, ATP1B3, ENPP2, KCNA5, AQP1, CD151, TPM1, IL17RA, KCNMB1, VCL, EPCAM, APP, PACSIN3, ILK, AP3D1, TES, PTPRC, ACTN1, ITGA2, NPY1R, PFKM, NEXN, KCNK3, KCTD10, CRHR2, PGM5, IGF2R, SGCD, SLC13A3, SYTL2, CACNA1C, RAB10	127	2203	12782	1.50763	0.963262	0.119332	15.5832
GOTERM_CC_FAT	GO:0005887~integral to plasma membrane	16	9.14286	0.191622	PTPRC, FGFR3, ATP1B3, ENPP2, ITGA2, KCNA5, NPY1R, AQP1, CD151, KCNMB1, KCNK3, IL17RA, CRHR2, KCTD10, APP, IGF2R	127	1188	12782	1.3555	1	0.660624	93.7364
GOTERM_CC_FAT	GO:0031226~intrinsic to plasma membrane	16	9.14286	0.215572	PTPRC, FGFR3, ATP1B3, ENPP2, ITGA2, KCNA5, NPY1R, AQP1, CD151, KCNMB1, KCNK3, IL17RA, CRHR2, KCTD10, APP, IGF2R	127	1215	12782	1.32538	1	0.667553	95.7663
SP_PIR_KEYWORDS	transmembrane protein	9	5.14286	0.226503	EPCAM, PTPRC, APP, FGFR3, MCL1, IGF2R, ITGA2, KCNA5, AQP1	175	642	19235	1.54085	1	0.876957	96.823
SP_PIR_KEYWORDS	membrane	59	33.7143	0.43775	TLN1, ATP1B3, CHMP6, PINK1, CD151, AQP1, IL17RA, VCL, LPHN2, EPCAM, APP, PACSIN3, ILK, RHOB, SLC25A1, PPP1R14C, KDELR1, PGAP3, NDUFB11, BAIAP2, CRHR2, NNT, IGF2R, SGCD, VCAN, RAB10, AOC2, MFSD7, FGFR3, MCL1, TNFRSF12A, C20ORF123, KCNA5, ABHD1, CCDC56, KCNMB1, DISP1, AP3D1, D4S234E, MANBAL, CDC42EP3, ENO1, RNF144A, PTPRC, B3GALT2, TMEM93, ITGA2, NPY1R, KCNK3, ATF4, CDAN1, KIAA0922, RAP1A, SLC13A3,…	175	6256	19235	1.0366	1	0.95393	99.9562
UP_SEQ_FEATURE	glycosylation site:N-linked (GlcNAc...)	39	22.2857	0.499708	CRELD2, FGFR3, ATP1B3, COL21A1, LYPD6, ENPP2, PDGFA, IGFBP7, KCNA5, ABHD1, CD151, AQP1, IL17RA, KCNMB1, TIMP1, LPHN2, EPCAM, APP, DISP1, SERPINE1, PGAP3, PTPRC, B3GALT2, CSNK2B, ITGA2, NPY1R, KCNK3, EMILIN1, SLIT3, CRHR2, IGF2R, KIAA0922, SGCD, SLC13A3, RELN, VCAN, AOC2, CACNA1C, VLDLR	175	4129	19113	1.0316	1	1	99.9969
SP_PIR_KEYWORDS	glycoprotein	40	22.8571	0.53423	CRELD2, FGFR3, ATP1B3, LYPD6, COL21A1, ENPP2, PDGFA, IGFBP7, KCNA5, ABHD1, CD151, AQP1, IL17RA, KCNMB1, TIMP1, LPHN2, EPCAM, APP, DISP1, SERPINE1, PGAP3, PTPRC, B3GALT2, CSNK2B, ITGA2, NPY1R, GYG1, KCNK3, EMILIN1, SLIT3, CRHR2, IGF2R, KIAA0922, SGCD, SLC13A3, RELN, VCAN, AOC2, CACNA1C, VLDLR	175	4318	19235	1.0182	1	0.973852	99.9965
SP_PIR_KEYWORDS	disulfide bond	25	14.2857	0.729335	CRELD2, FGFR3, ATP1B3, PDGFA, TNFRSF12A, ENPP2, IGFBP7, PRDX2, TIMP1, LPHN2, EPCAM, APP, CSNK2B, ITGA2, NPY1R, EMILIN1, SLIT3, CRHR2, SFRP2, IGF2R, SGCD, VCAN, RELN, CACNA1C, VLDLR	175	2924	19235	0.93976	1	0.994073	100
SP_PIR_KEYWORDS	transmembrane	41	23.4286	0.829734	MFSD7, FGFR3, ATP1B3, MCL1, TNFRSF12A, C20ORF123, PINK1, KCNA5, ABHD1, CD151, AQP1, CCDC56, IL17RA, KCNMB1, LPHN2, EPCAM, APP, DISP1, SLC25A1, D4S234E, KDELR1, MANBAL, PGAP3, RNF144A, PTPRC, NDUFB11, B3GALT2, TMEM93, ITGA2, NPY1R, KCNK3, CRHR2, NNT, IGF2R, CDAN1, KIAA0922, SGCD, SLC13A3, VCAN, CACNA1C, VLDLR	175	4973	19235	0.906191	1	0.998308	100
SP_PIR_KEYWORDS	receptor	12	6.85714	0.856783	LPHN2, CRHR2, PTPRC, FGFR3, TNFRSF12A, IGF2R, ITGA2, NPY1R, ABL1, KDELR1, IL17RA, VLDLR	175	1583	19235	0.83321	1	0.998936	100
UP_SEQ_FEATURE	transmembrane region	40	22.8571	0.86103	MFSD7, FGFR3, ATP1B3, MCL1, TNFRSF12A, C20ORF123, PINK1, KCNA5, ABHD1, CD151, AQP1, CCDC56, IL17RA, KCNMB1, LPHN2, EPCAM, APP, DISP1, SLC25A1, D4S234E, KDELR1, MANBAL, PGAP3, RNF144A, PTPRC, NDUFB11, B3GALT2, TMEM93, ITGA2, NPY1R, KCNK3, CRHR2, NNT, IGF2R, CDAN1, KIAA0922, SGCD, SLC13A3, CACNA1C, VLDLR	175	4911	19113	0.889572	1	1	100
UP_SEQ_FEATURE	topological domain:Cytoplasmic	26	14.8571	0.895289	FGFR3, ATP1B3, TNFRSF12A, PINK1, AQP1, CD151, IL17RA, KCNMB1, EPCAM, LPHN2, APP, D4S234E, KDELR1, PGAP3, PTPRC, B3GALT2, ITGA2, NPY1R, KCNK3, CRHR2, NNT, KIAA0922, IGF2R, SGCD, CACNA1C, VLDLR	175	3374	19113	0.841626	1	1	100
GOTERM_CC_FAT	GO:0031224~intrinsic to membrane	47	26.8571	0.940324	MFSD7, FGFR3, ATP1B3, MCL1, ENPP2, KCNAB1, TNFRSF12A, CHMP6, C20ORF123, PINK1, KCNA5, ABHD1, CD151, AQP1, CCDC56, IL17RA, KCNMB1, LPHN2, EPCAM, APP, DISP1, RHOB, SLC25A1, D4S234E, KDELR1, MANBAL, PGAP3, RNF144A, PTPRC, NDUFB11, B3GALT2, TMEM93, ITGA2, NPY1R, KCNK3, KCTD10, CRHR2, NNT, IGF2R, CDAN1, KIAA0922, RAP1A, SGCD, SLC13A3, VCAN, CACNA1C, VLDLR	127	5485	12782	0.862415	1	0.998907	100
GOTERM_CC_FAT	GO:0016021~integral to membrane	44	25.1429	0.962416	MFSD7, FGFR3, ATP1B3, MCL1, ENPP2, KCNAB1, TNFRSF12A, C20ORF123, PINK1, KCNA5, ABHD1, CD151, AQP1, CCDC56, IL17RA, KCNMB1, LPHN2, EPCAM, APP, DISP1, SLC25A1, D4S234E, KDELR1, MANBAL, PGAP3, RNF144A, PTPRC, NDUFB11, B3GALT2, TMEM93, ITGA2, NPY1R, KCNK3, KCTD10, CRHR2, NNT, IGF2R, CDAN1, KIAA0922, SGCD, SLC13A3, VCAN, CACNA1C, VLDLR	127	5297	12782	0.836022	1	0.999586	100
UP_SEQ_FEATURE	topological domain:Extracellular	18	10.2857	0.969192	PTPRC, FGFR3, ATP1B3, TNFRSF12A, ITGA2, NPY1R, AQP1, CD151, KCNMB1, IL17RA, EPCAM, LPHN2, CRHR2, APP, KIAA0922, SGCD, CACNA1C, VLDLR	175	2719	19113	0.723026	1	1	100
Annotation Cluster 79	Enrichment Score: 0.342165086160724
Category	Term	Count	%	PValue	Genes	List Total	Pop Hits	Pop Total	Fold Enrichment	Bonferroni	Benjamini	FDR
GOTERM_CC_FAT	GO:0015630~microtubule cytoskeleton	8	4.57143	0.297612	APP, KIF5B, DYNLT3, SLC13A3, MAPRE2, MAP7D1, TBL1X, MYH10	127	549	12782	1.4666	1	0.743223	98.9956
GOTERM_CC_FAT	GO:0005874~microtubule	4	2.28571	0.509311	KIF5B, DYNLT3, MAPRE2, TBL1X	127	274	12782	1.46928	1	0.886814	99.9906
SP_PIR_KEYWORDS	microtubule	3	1.71429	0.620686	KIF5B, DYNLT3, MAPRE2	175	231	19235	1.42746	1	0.987957	99.9998
Annotation Cluster 80	Enrichment Score: 0.3339154973374857
Category	Term	Count	%	PValue	Genes	List Total	Pop Hits	Pop Total	Fold Enrichment	Bonferroni	Benjamini	FDR
GOTERM_BP_FAT	GO:0051259~protein oligomerization	4	2.28571	0.248135	CUTA, ILK, PFKM, KCNA5	135	174	13528	2.30362	1	0.886513	99.1336
GOTERM_BP_FAT	GO:0065003~macromolecular complex assembly	9	5.14286	0.338084	CUTA, PRPF31, HIST1H2BC, ILK, SNRPB, SH3BGR, PFKM, KCNA5, FLNA	135	665	13528	1.35619	1	0.927456	99.8962
GOTERM_BP_FAT	GO:0043933~macromolecular complex subunit organization	9	5.14286	0.406258	CUTA, PRPF31, HIST1H2BC, ILK, SNRPB, SH3BGR, PFKM, KCNA5, FLNA	135	710	13528	1.27023	1	0.953098	99.983
GOTERM_BP_FAT	GO:0070271~protein complex biogenesis	6	3.42857	0.564105	CUTA, ILK, SH3BGR, PFKM, KCNA5, FLNA	135	505	13528	1.19058	1	0.984941	99.9999
GOTERM_BP_FAT	GO:0006461~protein complex assembly	6	3.42857	0.564105	CUTA, ILK, SH3BGR, PFKM, KCNA5, FLNA	135	505	13528	1.19058	1	0.984941	99.9999
GOTERM_BP_FAT	GO:0034622~cellular macromolecular complex assembly	4	2.28571	0.61366	PRPF31, HIST1H2BC, SNRPB, FLNA	135	318	13528	1.26047	1	0.990166	100
GOTERM_BP_FAT	GO:0034621~cellular macromolecular complex subunit organization	4	2.28571	0.690922	PRPF31, HIST1H2BC, SNRPB, FLNA	135	357	13528	1.12277	1	0.995967	100
Annotation Cluster 81	Enrichment Score: 0.3185973772711553
Category	Term	Count	%	PValue	Genes	List Total	Pop Hits	Pop Total	Fold Enrichment	Bonferroni	Benjamini	FDR
GOTERM_BP_FAT	GO:0006887~exocytosis	3	1.71429	0.315717	SYTL2, CACNA1C, MYH10	135	115	13528	2.61411	1	0.919309	99.8194
GOTERM_BP_FAT	GO:0046903~secretion	4	2.28571	0.573967	SYTL2, AQP1, CACNA1C, MYH10	135	300	13528	1.3361	1	0.986393	99.9999
GOTERM_BP_FAT	GO:0032940~secretion by cell	3	1.71429	0.610974	SYTL2, CACNA1C, MYH10	135	207	13528	1.45228	1	0.989977	100
Annotation Cluster 82	Enrichment Score: 0.31621035958735716
Category	Term	Count	%	PValue	Genes	List Total	Pop Hits	Pop Total	Fold Enrichment	Bonferroni	Benjamini	FDR
GOTERM_MF_FAT	GO:0060589~nucleoside-triphosphatase regulator activity	7	4	0.233351	JUN, RGS5, SYTL2, CYTH2, SPATA13, DNAJB6, ARHGAP10	131	413	12983	1.67978	1	0.925539	97.513
GOTERM_MF_FAT	GO:0005083~small GTPase regulator activity	5	2.85714	0.294607	JUN, SYTL2, CYTH2, SPATA13, ARHGAP10	131	274	12983	1.80852	1	0.938263	99.2185
GOTERM_MF_FAT	GO:0030695~GTPase regulator activity	6	3.42857	0.380148	JUN, RGS5, SYTL2, CYTH2, SPATA13, ARHGAP10	131	404	12983	1.47188	1	0.96663	99.8705
GOTERM_MF_FAT	GO:0008047~enzyme activator activity	5	2.85714	0.433026	APP, JUN, RGS5, DNAJB6, ARHGAP10	131	335	12983	1.47921	1	0.973674	99.9625
INTERPRO	IPR011993:Pleckstrin homology-type	4	2.28571	0.550773	TLN1, CYTH2, SPATA13, ARHGAP10	159	303	16659	1.38315	1	1	99.9987
UP_SEQ_FEATURE	domain:PH	3	1.71429	0.638086	CYTH2, SPATA13, ARHGAP10	175	237	19113	1.3825	1	1	100
GOTERM_MF_FAT	GO:0005096~GTPase activator activity	3	1.71429	0.650095	JUN, RGS5, ARHGAP10	131	220	12983	1.35146	1	0.994097	100
INTERPRO	IPR001849:Pleckstrin homology	3	1.71429	0.741868	CYTH2, SPATA13, ARHGAP10	159	277	16659	1.13473	1	1	100
SMART	SM00233:PH	3	1.71429	0.743417	CYTH2, SPATA13, ARHGAP10	87	277	9079	1.13021	1	0.999992	100
Annotation Cluster 83	Enrichment Score: 0.3141597143750679
Category	Term	Count	%	PValue	Genes	List Total	Pop Hits	Pop Total	Fold Enrichment	Bonferroni	Benjamini	FDR
GOTERM_BP_FAT	GO:0006511~ubiquitin-dependent protein catabolic process	5	2.85714	0.218871	UCHL5, PSME3, UBB, TBL1X, UBE2L3	135	242	13528	2.0704	1	0.868215	98.3638
GOTERM_BP_FAT	GO:0010498~proteasomal protein catabolic process	3	1.71429	0.268063	PSME3, UBB, TBL1X	135	102	13528	2.94728	1	0.897562	99.446
GOTERM_BP_FAT	GO:0043161~proteasomal ubiquitin-dependent protein catabolic process	3	1.71429	0.268063	PSME3, UBB, TBL1X	135	102	13528	2.94728	1	0.897562	99.446
GOTERM_BP_FAT	GO:0043632~modification-dependent macromolecule catabolic process	7	4	0.505661	RNF144A, UCHL5, FBXO32, PSME3, UBB, TBL1X, UBE2L3	135	574	13528	1.22204	1	0.975142	99.9992
GOTERM_BP_FAT	GO:0019941~modification-dependent protein catabolic process	7	4	0.505661	RNF144A, UCHL5, FBXO32, PSME3, UBB, TBL1X, UBE2L3	135	574	13528	1.22204	1	0.975142	99.9992
GOTERM_BP_FAT	GO:0051603~proteolysis involved in cellular protein catabolic process	7	4	0.549378	RNF144A, UCHL5, FBXO32, PSME3, UBB, TBL1X, UBE2L3	135	600	13528	1.16909	1	0.982893	99.9998
GOTERM_BP_FAT	GO:0044257~cellular protein catabolic process	7	4	0.554316	RNF144A, UCHL5, FBXO32, PSME3, UBB, TBL1X, UBE2L3	135	603	13528	1.16327	1	0.983379	99.9999
GOTERM_BP_FAT	GO:0044265~cellular macromolecule catabolic process	8	4.57143	0.582523	RNF144A, CASP3, UCHL5, FBXO32, PSME3, UBB, TBL1X, UBE2L3	135	725	13528	1.10574	1	0.987355	100
GOTERM_BP_FAT	GO:0030163~protein catabolic process	7	4	0.58501	RNF144A, UCHL5, FBXO32, PSME3, UBB, TBL1X, UBE2L3	135	622	13528	1.12774	1	0.987371	100
GOTERM_BP_FAT	GO:0009057~macromolecule catabolic process	8	4.57143	0.661194	RNF144A, CASP3, UCHL5, FBXO32, PSME3, UBB, TBL1X, UBE2L3	135	781	13528	1.02645	1	0.994173	100
SP_PIR_KEYWORDS	ubl conjugation pathway	5	2.85714	0.679698	RNF144A, UCHL5, FBXO32, TBL1X, UBE2L3	175	509	19235	1.07971	1	0.991514	100
GOTERM_BP_FAT	GO:0006508~proteolysis	8	4.57143	0.905632	RNF144A, CASP3, UCHL5, FBXO32, PSME3, UBB, TBL1X, UBE2L3	135	1054	13528	0.760588	1	0.999972	100
Annotation Cluster 84	Enrichment Score: 0.30806420261376133
Category	Term	Count	%	PValue	Genes	List Total	Pop Hits	Pop Total	Fold Enrichment	Bonferroni	Benjamini	FDR
GOTERM_CC_FAT	GO:0000785~chromatin	4	2.28571	0.315487	HMGN1, HIST1H2BC, JUN, HIRA	127	200	12782	2.01291	1	0.75225	99.282
SP_PIR_KEYWORDS	DNA binding	5	2.85714	0.375934	HMGN1, HIST1H2BC, ATF4, JUN, ZEB1	175	340	19235	1.61639	1	0.939847	99.8222
GOTERM_CC_FAT	GO:0005694~chromosome	5	2.85714	0.669442	HMGN1, HIST1H2BC, JUN, HIRA, PRRX2	127	460	12782	1.09397	1	0.949772	99.9999
GOTERM_CC_FAT	GO:0044427~chromosomal part	4	2.28571	0.737797	HMGN1, HIST1H2BC, JUN, HIRA	127	386	12782	1.04296	1	0.968868	100
Annotation Cluster 85	Enrichment Score: 0.29668507181855314
Category	Term	Count	%	PValue	Genes	List Total	Pop Hits	Pop Total	Fold Enrichment	Bonferroni	Benjamini	FDR
GOTERM_BP_FAT	GO:0043066~negative regulation of apoptosis	5	2.85714	0.466738	CASP3, MCL1, ILK, PRDX2, UBB	135	354	13528	1.41536	1	0.969079	99.9972
GOTERM_BP_FAT	GO:0043069~negative regulation of programmed cell death	5	2.85714	0.477579	CASP3, MCL1, ILK, PRDX2, UBB	135	359	13528	1.39565	1	0.970577	99.998
GOTERM_BP_FAT	GO:0060548~negative regulation of cell death	5	2.85714	0.479737	CASP3, MCL1, ILK, PRDX2, UBB	135	360	13528	1.39177	1	0.970867	99.9981
GOTERM_BP_FAT	GO:0006916~anti-apoptosis	3	1.71429	0.608328	MCL1, PRDX2, UBB	135	206	13528	1.45933	1	0.989791	100
Annotation Cluster 86	Enrichment Score: 0.2692373842073807
Category	Term	Count	%	PValue	Genes	List Total	Pop Hits	Pop Total	Fold Enrichment	Bonferroni	Benjamini	FDR
GOTERM_BP_FAT	GO:0050877~neurological system process	15	8.57143	0.311124	ITGA2, IDH3B, NPY1R, KCNK3, KCNMB1, APP, CASP3, JUN, ILK, UBB, TBL1X, AOC2, CACNA1C, MYH10, VLDLR	135	1210	13528	1.24224	1	0.918359	99.7981
GOTERM_BP_FAT	GO:0050890~cognition	10	5.71429	0.55013	APP, CASP3, JUN, IDH3B, ITGA2, NPY1R, AOC2, CACNA1C, TBL1X, VLDLR	135	909	13528	1.10239	1	0.982806	99.9998
GOTERM_BP_FAT	GO:0007600~sensory perception	6	3.42857	0.909681	CASP3, IDH3B, ITGA2, NPY1R, AOC2, TBL1X	135	810	13528	0.742277	1	0.999976	100
Annotation Cluster 87	Enrichment Score: 0.2535166186560165
Category	Term	Count	%	PValue	Genes	List Total	Pop Hits	Pop Total	Fold Enrichment	Bonferroni	Benjamini	FDR
UP_SEQ_FEATURE	transit peptide:Mitochondrion	7	4	0.253165	BCKDHA, NDUFB11, NNT, FARS2, IDH3B, PINK1, SLC25A1	175	467	19113	1.63709	1	0.999989	98.7396
SP_PIR_KEYWORDS	transit peptide	7	4	0.262302	BCKDHA, NDUFB11, NNT, FARS2, IDH3B, PINK1, SLC25A1	175	476	19235	1.61639	1	0.905364	98.3188
GOTERM_CC_FAT	GO:0044429~mitochondrial part	8	4.57143	0.371368	BCKDHA, NDUFB11, NNT, MCL1, FARS2, IDH3B, PINK1, SLC25A1	127	595	12782	1.35322	1	0.79676	99.7632
GOTERM_CC_FAT	GO:0005739~mitochondrion	12	6.85714	0.509996	PABPN1, BCKDHA, NDUFB11, CASP3, NNT, MCL1, FARS2, IDH3B, PINK1, SLC25A1, CCDC56, SLIT3	127	1087	12782	1.11108	1	0.88433	99.9908
SP_PIR_KEYWORDS	mitochondrion inner membrane	3	1.71429	0.522722	NDUFB11, NNT, SLC25A1	175	193	19235	1.70851	1	0.973736	99.9951
GOTERM_CC_FAT	GO:0031966~mitochondrial membrane	5	2.85714	0.54717	NDUFB11, NNT, MCL1, PINK1, SLC25A1	127	394	12782	1.27723	1	0.90366	99.9967
GOTERM_CC_FAT	GO:0031975~envelope	7	4	0.580501	NDUFB11, NNT, MCL1, IGF2R, PINK1, ITGA2, SLC25A1	127	622	12782	1.13267	1	0.918517	99.9988
GOTERM_CC_FAT	GO:0005740~mitochondrial envelope	5	2.85714	0.596176	NDUFB11, NNT, MCL1, PINK1, SLC25A1	127	419	12782	1.20102	1	0.92482	99.9993
SP_PIR_KEYWORDS	mitochondrion	8	4.57143	0.630967	BCKDHA, NDUFB11, NNT, MCL1, FARS2, IDH3B, PINK1, SLC25A1	175	832	19235	1.05687	1	0.988652	99.9998
GOTERM_CC_FAT	GO:0031980~mitochondrial lumen	3	1.71429	0.65862	BCKDHA, FARS2, IDH3B	127	227	12782	1.33012	1	0.946889	99.9999
GOTERM_CC_FAT	GO:0005759~mitochondrial matrix	3	1.71429	0.65862	BCKDHA, FARS2, IDH3B	127	227	12782	1.33012	1	0.946889	99.9999
GOTERM_CC_FAT	GO:0031967~organelle envelope	6	3.42857	0.737717	NDUFB11, NNT, MCL1, IGF2R, PINK1, SLC25A1	127	620	12782	0.97399	1	0.969938	100
GOTERM_CC_FAT	GO:0005743~mitochondrial inner membrane	3	1.71429	0.808347	NDUFB11, NNT, SLC25A1	127	306	12782	0.986722	1	0.985573	100
GOTERM_CC_FAT	GO:0019866~organelle inner membrane	3	1.71429	0.839417	NDUFB11, NNT, SLC25A1	127	329	12782	0.917742	1	0.989479	100
GOTERM_CC_FAT	GO:0031090~organelle membrane	8	4.57143	0.923338	PGAP3, NDUFB11, NNT, MCL1, CHMP6, RHOB, PINK1, SLC25A1	127	1096	12782	0.73464	1	0.998113	100
Annotation Cluster 88	Enrichment Score: 0.24831994740001814
Category	Term	Count	%	PValue	Genes	List Total	Pop Hits	Pop Total	Fold Enrichment	Bonferroni	Benjamini	FDR
GOTERM_BP_FAT	GO:0016477~cell migration	4	2.28571	0.517348	TNFRSF12A, VCAN, RELN, MYH10	135	276	13528	1.45228	1	0.977201	99.9995
GOTERM_BP_FAT	GO:0051674~localization of cell	4	2.28571	0.589697	TNFRSF12A, VCAN, RELN, MYH10	135	307	13528	1.30563	1	0.987717	100
GOTERM_BP_FAT	GO:0048870~cell motility	4	2.28571	0.589697	TNFRSF12A, VCAN, RELN, MYH10	135	307	13528	1.30563	1	0.987717	100
Annotation Cluster 89	Enrichment Score: 0.23894314125850635
Category	Term	Count	%	PValue	Genes	List Total	Pop Hits	Pop Total	Fold Enrichment	Bonferroni	Benjamini	FDR
SP_PIR_KEYWORDS	signal	31	17.7143	0.483045	CRELD2, FGFR3, COL21A1, LYPD6, ENPP2, PDGFA, TNFRSF12A, IGFBP7, IL17RA, TIMP1, LPHN2, EPCAM, APP, SERPINE1, LOXL1, PGAP3, CUTA, PTPRC, CSNK2B, ITGA2, CECR5, SLIT3, EMILIN1, CRHR2, SFRP2, IGF2R, KIAA0922, RELN, VCAN, AOC2, VLDLR	175	3250	19235	1.04841	1	0.966925	99.9858
UP_SEQ_FEATURE	signal peptide	31	17.7143	0.498273	CRELD2, FGFR3, COL21A1, LYPD6, ENPP2, PDGFA, TNFRSF12A, IGFBP7, IL17RA, TIMP1, LPHN2, EPCAM, APP, SERPINE1, LOXL1, PGAP3, CUTA, PTPRC, CSNK2B, ITGA2, CECR5, SLIT3, EMILIN1, CRHR2, SFRP2, IGF2R, KIAA0922, RELN, VCAN, AOC2, VLDLR	175	3250	19113	1.04176	1	1	99.9967
UP_SEQ_FEATURE	glycosylation site:N-linked (GlcNAc...)	39	22.2857	0.499708	CRELD2, FGFR3, ATP1B3, COL21A1, LYPD6, ENPP2, PDGFA, IGFBP7, KCNA5, ABHD1, CD151, AQP1, IL17RA, KCNMB1, TIMP1, LPHN2, EPCAM, APP, DISP1, SERPINE1, PGAP3, PTPRC, B3GALT2, CSNK2B, ITGA2, NPY1R, KCNK3, EMILIN1, SLIT3, CRHR2, IGF2R, KIAA0922, SGCD, SLC13A3, RELN, VCAN, AOC2, CACNA1C, VLDLR	175	4129	19113	1.0316	1	1	99.9969
GOTERM_CC_FAT	GO:0005576~extracellular region	21	12	0.519736	TLN1, CRELD2, COL21A1, LYPD6, ENPP2, PDGFA, IGFBP7, CSNK2B, ACTN1, FLNA, TIMP1, EMILIN1, VCL, SLIT3, APP, SFRP2, SERPINE1, RELN, VCAN, LOXL1, VLDLR	127	2010	12782	1.05152	1	0.888265	99.9929
SP_PIR_KEYWORDS	glycoprotein	40	22.8571	0.53423	CRELD2, FGFR3, ATP1B3, LYPD6, COL21A1, ENPP2, PDGFA, IGFBP7, KCNA5, ABHD1, CD151, AQP1, IL17RA, KCNMB1, TIMP1, LPHN2, EPCAM, APP, DISP1, SERPINE1, PGAP3, PTPRC, B3GALT2, CSNK2B, ITGA2, NPY1R, GYG1, KCNK3, EMILIN1, SLIT3, CRHR2, IGF2R, KIAA0922, SGCD, SLC13A3, RELN, VCAN, AOC2, CACNA1C, VLDLR	175	4318	19235	1.0182	1	0.973852	99.9965
SP_PIR_KEYWORDS	Secreted	15	8.57143	0.673575	CRELD2, COL21A1, LYPD6, ENPP2, PDGFA, IGFBP7, CSNK2B, TIMP1, SLIT3, EMILIN1, SFRP2, SERPINE1, VCAN, RELN, LOXL1	175	1689	19235	0.976148	1	0.991385	100
SP_PIR_KEYWORDS	disulfide bond	25	14.2857	0.729335	CRELD2, FGFR3, ATP1B3, PDGFA, TNFRSF12A, ENPP2, IGFBP7, PRDX2, TIMP1, LPHN2, EPCAM, APP, CSNK2B, ITGA2, NPY1R, EMILIN1, SLIT3, CRHR2, SFRP2, IGF2R, SGCD, VCAN, RELN, CACNA1C, VLDLR	175	2924	19235	0.93976	1	0.994073	100
UP_SEQ_FEATURE	disulfide bond	24	13.7143	0.747238	FGFR3, CRELD2, ATP1B3, ENPP2, TNFRSF12A, PDGFA, IGFBP7, CSNK2B, ITGA2, PRDX2, NPY1R, TIMP1, EMILIN1, SLIT3, EPCAM, LPHN2, CRHR2, APP, SFRP2, IGF2R, SGCD, RELN, VCAN, VLDLR	175	2819	19113	0.929837	1	1	100
Annotation Cluster 90	Enrichment Score: 0.18865045286143095
Category	Term	Count	%	PValue	Genes	List Total	Pop Hits	Pop Total	Fold Enrichment	Bonferroni	Benjamini	FDR
INTERPRO	IPR000504:RNA recognition motif, RNP-1	3	1.71429	0.597327	NONO, PABPN1, CPNE1	159	211	16659	1.48967	1	1	99.9997
SMART	SM00360:RRM	3	1.71429	0.598089	NONO, PABPN1, CPNE1	87	211	9079	1.48374	1	0.99998	99.9955
INTERPRO	IPR012677:Nucleotide-binding, alpha-beta plait	3	1.71429	0.602479	NONO, PABPN1, CPNE1	159	213	16659	1.47568	1	1	99.9998
SP_PIR_KEYWORDS	rna-binding	5	2.85714	0.723626	NONO, PABPN1, PRPF31, CPNE1, SNRPB	175	540	19235	1.01772	1	0.99397	100
GOTERM_MF_FAT	GO:0003723~RNA binding	7	4	0.731668	NONO, PABPN1, PRPF31, FARS2, CPNE1, SNRPB, SCAND1	131	718	12983	0.966223	1	0.997106	100
Annotation Cluster 91	Enrichment Score: 0.18138560721777724
Category	Term	Count	%	PValue	Genes	List Total	Pop Hits	Pop Total	Fold Enrichment	Bonferroni	Benjamini	FDR
UP_SEQ_FEATURE	repeat:WD 7	3	1.71429	0.396422	PRPF19, HIRA, TBL1X	175	150	19113	2.18434	1	0.999998	99.9482
UP_SEQ_FEATURE	repeat:WD 6	3	1.71429	0.523396	PRPF19, HIRA, TBL1X	175	192	19113	1.70652	1	1	99.9985
UP_SEQ_FEATURE	repeat:WD 5	3	1.71429	0.628845	PRPF19, HIRA, TBL1X	175	233	19113	1.40623	1	1	100
INTERPRO	IPR019782:WD40 repeat 2	3	1.71429	0.634759	PRPF19, HIRA, TBL1X	159	226	16659	1.3908	1	1	99.9999
INTERPRO	IPR017986:WD40 repeat, region	3	1.71429	0.662718	PRPF19, HIRA, TBL1X	159	238	16659	1.32068	1	1	100
UP_SEQ_FEATURE	repeat:WD 4	3	1.71429	0.669016	PRPF19, HIRA, TBL1X	175	251	19113	1.30538	1	1	100
INTERPRO	IPR019781:WD40 repeat, subgroup	3	1.71429	0.67165	PRPF19, HIRA, TBL1X	159	242	16659	1.29885	1	1	100
UP_SEQ_FEATURE	repeat:WD 3	3	1.71429	0.697788	PRPF19, HIRA, TBL1X	175	265	19113	1.23642	1	1	100
UP_SEQ_FEATURE	repeat:WD 2	3	1.71429	0.715176	PRPF19, HIRA, TBL1X	175	274	19113	1.19581	1	1	100
UP_SEQ_FEATURE	repeat:WD 1	3	1.71429	0.715176	PRPF19, HIRA, TBL1X	175	274	19113	1.19581	1	1	100
SP_PIR_KEYWORDS	wd repeat	3	1.71429	0.715637	PRPF19, HIRA, TBL1X	175	276	19235	1.19472	1	0.994079	100
INTERPRO	IPR001680:WD40 repeat	3	1.71429	0.721296	PRPF19, HIRA, TBL1X	159	266	16659	1.18166	1	1	100
SMART	SM00320:WD40	3	1.71429	0.722737	PRPF19, HIRA, TBL1X	87	266	9079	1.17695	1	0.999995	99.9999
INTERPRO	IPR019775:WD40 repeat, conserved site	3	1.71429	0.741868	PRPF19, HIRA, TBL1X	159	277	16659	1.13473	1	1	100
INTERPRO	IPR015943:WD40/YVTN repeat-like	3	1.71429	0.780734	PRPF19, HIRA, TBL1X	159	300	16659	1.04774	1	1	100
Annotation Cluster 92	Enrichment Score: 0.17701677684606837
Category	Term	Count	%	PValue	Genes	List Total	Pop Hits	Pop Total	Fold Enrichment	Bonferroni	Benjamini	FDR
INTERPRO	IPR013098:Immunoglobulin I-set	3	1.71429	0.37726	FGFR3, IGFBP7, NEXN	159	138	16659	2.27769	1	0.999971	99.8707
INTERPRO	IPR003599:Immunoglobulin subtype	4	2.28571	0.608827	FGFR3, IGFBP7, VCAN, NEXN	159	330	16659	1.26998	1	1	99.9998
SMART	SM00409:IG	4	2.28571	0.610022	FGFR3, IGFBP7, VCAN, NEXN	87	330	9079	1.26493	1	0.999952	99.9968
SP_PIR_KEYWORDS	Immunoglobulin domain	4	2.28571	0.801378	FGFR3, IGFBP7, VCAN, NEXN	175	470	19235	0.935441	1	0.997433	100
INTERPRO	IPR007110:Immunoglobulin-like	4	2.28571	0.858143	FGFR3, IGFBP7, VCAN, NEXN	159	501	16659	0.836516	1	1	100
INTERPRO	IPR013783:Immunoglobulin-like fold	4	2.28571	0.899542	FGFR3, VCAN, NEXN, FLNA	159	553	16659	0.757856	1	1	100
Annotation Cluster 93	Enrichment Score: 0.1554531438094181
Category	Term	Count	%	PValue	Genes	List Total	Pop Hits	Pop Total	Fold Enrichment	Bonferroni	Benjamini	FDR
GOTERM_MF_FAT	GO:0008236~serine-type peptidase activity	3	1.71429	0.534673	SERPINE1, RELN, ENO1	131	178	12983	1.67034	1	0.989967	99.9976
GOTERM_MF_FAT	GO:0017171~serine hydrolase activity	3	1.71429	0.540717	SERPINE1, RELN, ENO1	131	180	12983	1.65178	1	0.989335	99.998
GOTERM_MF_FAT	GO:0008233~peptidase activity	6	3.42857	0.686732	APP, CASP3, SERPINE1, UCHL5, RELN, ENO1	131	574	12983	1.03596	1	0.995496	100
GOTERM_MF_FAT	GO:0070011~peptidase activity, acting on L-amino acid peptides	5	2.85714	0.805484	CASP3, SERPINE1, UCHL5, RELN, ENO1	131	549	12983	0.902613	1	0.999185	100
SP_PIR_KEYWORDS	Protease	4	2.28571	0.817178	APP, CASP3, UCHL5, RELN	175	484	19235	0.908383	1	0.997965	100
GOTERM_MF_FAT	GO:0004175~endopeptidase activity	3	1.71429	0.893432	CASP3, SERPINE1, ENO1	131	375	12983	0.792855	1	0.999934	100
Annotation Cluster 94	Enrichment Score: 0.09060141150264188
Category	Term	Count	%	PValue	Genes	List Total	Pop Hits	Pop Total	Fold Enrichment	Bonferroni	Benjamini	FDR
GOTERM_MF_FAT	GO:0046872~metal ion binding	42	24	0.567289	MOCOS, SEPX1, CRELD2, ATP1B3, ENPP2, KCNAB1, TNNC1, FARS2, PINK1, KCNA5, ZEB1, MYL9, APP, CALML4, DYRK3, CIB2, LOXL1, ENO1, TES, BCKDHA, RNF144A, KLF6, B3GALT2, IDH3B, MYLPF, ACTN1, ITGA2, PFKM, KCNK3, SLIT3, PGM5, SLC13A3, RELN, VCAN, SYTL2, DPYD, UBB, ABL1, AOC2, CACNA1C, RERE, VLDLR	131	4140	12983	1.00543	1	0.990712	99.9991
GOTERM_MF_FAT	GO:0043169~cation binding	42	24	0.596082	MOCOS, SEPX1, CRELD2, ATP1B3, ENPP2, KCNAB1, TNNC1, FARS2, PINK1, KCNA5, ZEB1, MYL9, APP, CALML4, DYRK3, CIB2, LOXL1, ENO1, TES, BCKDHA, RNF144A, KLF6, B3GALT2, IDH3B, MYLPF, ACTN1, ITGA2, PFKM, KCNK3, SLIT3, PGM5, SLC13A3, RELN, VCAN, SYTL2, DPYD, UBB, ABL1, AOC2, CACNA1C, RERE, VLDLR	131	4179	12983	0.996049	1	0.992215	99.9997
GOTERM_MF_FAT	GO:0043167~ion binding	42	24	0.640561	MOCOS, SEPX1, CRELD2, ATP1B3, ENPP2, KCNAB1, TNNC1, FARS2, PINK1, KCNA5, ZEB1, MYL9, APP, CALML4, DYRK3, CIB2, LOXL1, ENO1, TES, BCKDHA, RNF144A, KLF6, B3GALT2, IDH3B, MYLPF, ACTN1, ITGA2, PFKM, KCNK3, SLIT3, PGM5, SLC13A3, RELN, VCAN, SYTL2, DPYD, UBB, ABL1, AOC2, CACNA1C, RERE, VLDLR	131	4241	12983	0.981488	1	0.99446	99.9999
SP_PIR_KEYWORDS	metal-binding	23	13.1429	0.873497	BCKDHA, RNF144A, KLF6, SEPX1, ENPP2, CTDSPL, IDH3B, PINK1, ZEB1, PFKM, TIMP1, APP, PGM5, DYRK3, RELN, UBB, DPYD, ABL1, AOC2, LOXL1, RERE, TES, ENO1	175	2972	19235	0.850615	1	0.999192	100
GOTERM_MF_FAT	GO:0046914~transition metal ion binding	17	9.71429	0.997594	RNF144A, MOCOS, KLF6, SEPX1, B3GALT2, IDH3B, ZEB1, APP, SYTL2, RELN, UBB, DPYD, ABL1, AOC2, LOXL1, RERE, TES	131	2785	12983	0.604961	1	1	100
SP_PIR_KEYWORDS	zinc	10	5.71429	0.998562	RNF144A, KLF6, SEPX1, APP, RELN, UBB, ZEB1, RERE, TES, TIMP1	175	2189	19235	0.502121	1	1	100
GOTERM_MF_FAT	GO:0008270~zinc ion binding	10	5.71429	0.999911	RNF144A, KLF6, SEPX1, APP, SYTL2, RELN, UBB, ZEB1, RERE, TES	131	2311	12983	0.428848	1	1	100
SP_PIR_KEYWORDS	zinc-finger	5	2.85714	0.999921	RNF144A, KLF6, UBB, ZEB1, RERE	175	1718	19235	0.31989	1	1	100

## Sheet: Upregulated genes in Artery
Original row	Name	exSYMBOL	Primary_id	UniGene	ENSEMBL	entrez	symbol	Descr	CHR_LOCATION	PROBE_ID	Expected score (dExp)	Observed score(d)	Numerator(r)	Denominator (s+s0)	Fold change(Unlogged)	Ascending.aorta_1.cexp	Ascending.aorta_2.cexp	Corner.pulmunary.valve_F_1.cexp	Corner.pulmunary.valve_F_2.cexp	Corner.pulmunary.valve_I_1.cexp	Corner.pulmunary.valve_I_2.cexp	Coronary.artery_1.cexp	Coronary.artery_2.cexp	Descending.aorta_1.cexp	Descending.aorta_2.cexp	Inferior.vena.cava_1.cexp	Inferior.vena.cava_2.cexp	Pulmunary.artery_1.cexp	Pulmunary.artery_2.cexp	Superior.vena.cava_1.cexp	Superior.vena.cava_2.cexp	atrium_left2.exp	atrium_left3.exp	ventr_left1.exp	ventr_left2.exp
13994	pig31721;pig31722	APP	ENSSSCT00000013154|ENSSSCT00000013153	Ssc.14258	ENSSSCG00000012022	397663	APP	Amyloid beta A4 protein Precursor (Alzheimer disease amyloid A4 protein homolog)(ABPP)(APP) [Contains Soluble APP-alpha(S-APP-alpha);Soluble APP-beta(S-APP-beta);C99;Beta-amyloid protein 42(Beta-APP42);Beta-amyloid protein 40(Beta-APP40);C83;P3(42);P3(40);Gamma-secretase C-terminal fragment 59(Gamma-CTF(59));Gamma-secretase C-terminal fragment 57(Gamma-CTF(57));Gamma-secretase C-terminal fragment…	chrNA:-1--1	pig31721;pig31722	0.413768	-3.68186	-0.904036	0.245538	0.541042	13.9662	13.9181	11.5691	11.7211	12.7854	11.8199	11.9117	12.3708	13.5278	14.0141	12.645	12.8123	13.3917	14.1967	13.4195	12.9332	12.7002	12.0137	11.7343	12.9181
4965	pig14913;pig14914	ABHD1;Abhd1	ENSSSCT00000009359	Ssc.49620	ENSSSCG00000008554		ABHD1	Transcribed locus, moderately similar to NP_001008520.1 abhydrolase domain containing 1 [Rattus norvegicus]	chrNA:-1--1	pig14913;pig14914	-0.58998	-3.89775	-0.405565	0.104051	0.75434	11.7147	11.6063	11.7761	11.5941	11.4117	11.4807	11.7841	11.595	11.4877	11.559	11.0906	11.1843	11.6434	10.9874	11.2478	11.2227	NaN	10.5786	NaN	10.9797
15145	pig44155;pig44156	ABL1	Ssc#S19539485	Ssc.11200			ABL1	Transcribed locus, strongly similar to NP_005148.2 c-abl oncogene 1, receptor tyrosine kinase isoform a [Homo sapiens]	chrNA:-1--1	pig44155;pig44156	0.554791	-5.93672	-1.52471	0.256827	0.338874	13.5328	13.203	11.0324	10.699	11.6876	11.891	12.5567	12.2825	14.1497	13.5278	11.975	11.9532	13.8195	12.9774	12.2796	12.1068	10.8251	10.8964	10.785	12.122
13609	pig12869;pig12870	ACTB;Actb	ENSSSCT00000008324|ENSSSCT00000008325	Ssc.53735|Ssc.74419	ENSSSCG00000007585	414396	ACTB	Actin, cytoplasmic 1 (Beta-actin) [Contains Actin, cytoplasmic 1, N-terminally processed] [Source:UniProtKB/Swiss-Prot;Acc:Q6QAQ1]|Actin, beta|Transcribed locus, strongly similar to NP_031419.1 actin, beta [Mus musculus]	chrNA:-1--1	pig12869;pig12870	0.368883	-3.7693	-1.67964	0.445612	0.343762	14.4669	14.6044	13.111	13.5278	13.225	12.923	12.6124	12.9982	14.6721	14.9642	12.3656	12.2995	14.3206	14.771	13.5575	13.7665	12.039	11.6877	10.7576	10.85
8373	pig25459;pig25460	ACTN1;Actn1	ENSSSCT00000002561	Ssc.5941	ENSSSCG00000002300		ACTN1	Transcribed locus, strongly similar to NP_598917.1 actinin, alpha 1 [Mus musculus]	chrNA:-1--1	pig25459;pig25460	-0.191813	-5.14619	-1.76567	0.343103	0.312856	15.9297	15.835	12.9181	12.6203	14.5978	14.771	15.2887	15.3168	15.82	15.8443	13.587	13.5703	15.8443	15.4825	14.556	14.653	11.4366	11.2337	11.9359	12.6927
15612	pig47051;pig47052	AG2	Ssc#S35173788	Ssc.17312			AG2	Transcribed locus, strongly similar to NP_001138505.1 hypothetical protein LOC387763 [Homo sapiens]	chrNA:-1--1	pig47051;pig47052	0.616145	-6.68035	-2.9058	0.434977	0.148565	15.8381	15.8212	12.0069	12.1678	13.5451	13.8127	15.2887	15.3168	15.82	15.8443	12.2961	12.2281	15.5602	15.3935	13.4124	13.7638	10.9216	11.1778	11.1059	11.1385
925	pig01388;pig01389	AOC2	ENSSSCT00000018923		ENSSSCG00000017384		AOC2	Retina-specific copper amine oxidase Precursor (RAO)(EC 1.4.3.22)(Amine oxidase [copper-containing]) [Source:UniProtKB/Swiss-Prot;Acc:O75106]	chrNA:-1--1	pig01388;pig01389	-1.41489	-4.10059	-0.528239	0.12882	0.696725	11.4934	11.479	11.2312	11.0098	11.6019	11.5623	11.295	11.1084	11.5012	11.4394	NaN	10.8169	11.6426	10.7823	11.1395	11.0366	10.7363	NaN	11.0951	11.3723
14476	pig39768	AP3D1	Ssc#S38675441	Ssc.3398		100049700	AP3D1	Adaptor-related protein complex 3, delta 1 subunit	chrNA:-1--1	pig39768	0.471305	-4.1797	-0.619267	0.148161	0.651428	13.1974	12.9733	12.0755	12.0664	12.2698	12.8658	12.343	12.0543	13.2751	13.0375	12.3812	12.3734	12.8388	12.5557	12.5669	12.6847	NaN	10.7422	10.8119	12.411
16562	pig53696	AQP1	Ssc#S35171789	Ssc.27596		407773	AQP1	Aquaporin 1	chrNA:-1--1	pig53696	0.752561	-5.60438	-1.50949	0.269341	0.345295	13.8781	13.4923	11.1778	10.8176	13.1904	12.9833	11.6859	11.611	14.2357	13.3991	12.1079	12.068	14.0968	13.7981	12.5763	12.215	11.3354	11.3105	NaN	11.1464
3136	pig09209;pig09210	ARHGAP10	ENSSSCT00000009888		ENSSSCG00000009029		ARHGAP10	Rho GTPase-activating protein 10 (Rho-type GTPase-activating protein 10)(GTPase regulator associated with focal adhesion kinase 2)(Graf-related protein 2) [Source:UniProtKB/Swiss-Prot;Acc:A1A4S6]	chrNA:-1--1	pig09209;pig09210	-0.86274	-4.01393	-0.683918	0.170386	0.622028	12.0935	12.1037	11.5106	11.2919	11.6157	11.5562	11.6251	11.4233	11.9232	11.7135	11.1977	11.4006	11.8928	10.9011	11.4293	11.0707	10.7471	10.5861	NaN	11.1614
3135	pig09207;pig09208	ARHGAP10;Arhgap10	ENSSSCT00000009887	Ssc.20255	ENSSSCG00000009028		ARHGAP10	Transcribed locus, strongly similar to NP_084389.2 Rho GTPase activating protein 10 [Mus musculus]	chrNA:-1--1	pig09207;pig09208	-0.862905	-4.57789	-0.687013	0.150072	0.624792	11.9287	11.8697	11.3469	11.3594	11.8856	11.7368	11.5066	11.2965	12.0492	11.9082	11.0586	11.161	12.185	11.4057	11.512	11.2761	10.9069	10.7876	11.0481	11.6991
2402	pig06500;pig06501	ATF4	ENSSSCT00000000090	Ssc.37849	ENSSSCG00000000084	100144302	ATF4	Activating transcription factor 4 (tax-responsive enhancer element B67)	chrNA:-1--1	pig06500;pig06501	-1.00105	-5.67999	-1.57755	0.277738	0.33623	13.7879	13.6417	11.522	11.2744	11.7853	11.9798	12.0655	11.8248	13.4676	13.0472	11.6708	11.6422	12.6247	11.7671	12.3676	11.9536	11.1302	10.9057	10.7084	11.5536
10304	pig30978;pig30979	ATP1B3	ENSSSCT00000012782	Ssc.5649	ENSSSCG00000011676		ATP1B3	Transcribed locus, moderately similar to NP_001670.1 Na+/K+ -ATPase beta 3 subunit [Homo sapiens]	chrNA:-1--1	pig30978;pig30979	0.0116991	-4.23768	-1.09682	0.258825	0.467286	14.3941	14.1818	13.386	13.8037	13.5484	13.3075	13.0498	13.2006	14.6752	14.8719	13.111	13.2465	14.5712	14.8806	13.693	13.6851	11.018	11.1258	11.0446	12.9469
686	pig00626;pig00627		ENSSSCT00000018158		ENSSSCG00000016678		B1B1R0	Nucleotide-binding oligomerization domain 1 [Source:UniProtKB/TrEMBL;Acc:B1B1R0]	chrNA:-1--1	pig00626;pig00627	-1.53108	-4.60694	-0.411632	0.0893504	0.752225	11.1466	11.0945	10.9863	10.9335	11.4345	11.342	11.0944	10.8927	11.2004	11.1114	NaN	NaN	11.4895	10.6146	10.7985	10.6256	10.6348	NaN	10.795	11.167
1730	pig04082;pig04083	B3GALT2	ENSSSCT00000011816		ENSSSCG00000010800		B3GALT2	Beta-1,3-galactosyltransferase 2 (Beta-1,3-GalTase 2)(Beta3Gal-T2)(EC 2.4.1.-)(UDP-galactose:2-acetamido-2-deoxy-D-glucose 3beta-galactosyltransferase 2) [Source:UniProtKB/Swiss-Prot;Acc:O43825]	chrNA:-1--1	pig04082;pig04083	-1.15403	-4.15492	-0.615085	0.148038	0.656215	11.5248	11.408	11.1236	10.7884	11.4169	11.5087	11.2285	10.9927	11.4913	11.3289	NaN	10.7355	11.5355	10.8683	11.0985	10.7644	10.8369	10.8155	11.2209	11.7102
771	pig00881		ENSSSCT00000018662		ENSSSCG00000017142		BAIAP2	Brain-specific angiogenesis inhibitor 1-associated protein 2 (BAI1-associated protein 2)(BAI-associated protein 2)(Protein BAP2)(Insulin receptor substrate p53)(Insulin receptor substrate protein of 53 kDa)(IRSp53)(Insulin receptor substrate p53/p58)(IRSp53/58)(IRS-58)(Fas ligand-associated factor 3)(FLAF3) [Source:UniProtKB/Swiss-Prot;Acc:Q9UQB8]	chrNA:-1--1	pig00881	-1.48673	-4.2876	-0.405725	0.0946276	0.753552	11.4115	11.5349	10.9796	10.8109	11.4002	11.5647	10.9828	10.7411	11.6513	11.5143	NaN	NaN	11.6286	10.6231	11.1169	11.1124	NaN	NaN	NaN	11.0407
3565	pig10589;pig10590	BCKDHA	ENSSSCT00000003340	Ssc.16650	ENSSSCG00000003007	100142666	BCKDHA	Branched chain keto acid dehydrogenase E1, alpha polypeptide	chrNA:-1--1	pig10589;pig10590	-0.79161	-3.9681	-0.822614	0.207307	0.563057	12.8273	12.6413	12.0613	11.6459	11.9323	12.2182	12.5068	12.2056	12.4709	12.2342	11.7374	11.8842	12.5338	11.8174	11.8319	11.4297	11.1394	11.1056	10.9236	11.7878
16185	pig50789;pig50790	BEND5;Bend5	Ssc#S18359088	Ssc.24015			BEND5	Transcribed locus, strongly similar to NP_080555.1 BEN domain containing 5 [Mus musculus]	chrNA:-1--1	pig50789;pig50790	0.696667	-4.75791	-1.41322	0.297025	0.360364	12.2665	11.7666	10.7174	NaN	11.1816	11.2915	11.2968	11.1386	12.9543	12.4698	11.0667	11.0127	12.4088	11.9614	10.8922	10.8327	10.8233	10.8347	10.8356	10.9472
11214	pig33533	C10ORF116;C10orf116;LOC100154721	ENSSSCT00000011348		ENSSSCG00000010366	100154721	C10orf116	Adipose most abundant gene transcript 2 protein (apM-2) [Source:UniProtKB/Swiss-Prot;Acc:Q15847]	chrNA:-1--1	pig33533	0.107641	-16.8157	-1.85398	0.110253	0.276333	15.2967	15.2367	11.0681	10.8521	13.2154	13.4676	15.2887	15.3168	15.2723	15.0599	13.3968	13.4195	14.7026	14.0332	13.2551	13.3782	10.6777	NaN	10.7322	11.3748
3518	pig10461;pig10462	C19ORF33;C19orf33	ENSSSCT00000003275	Ssc.48104	ENSSSCG00000002953		C19orf33	Transcribed locus, moderately similar to XP_001254970.1 PREDICTED: similar to HAI-2 related small protein [Bos taurus]	chrNA:-1--1	pig10461;pig10462	-0.799329	-5.82476	-2.07794	0.356743	0.249965	13.5467	13.838	11.262	11.4077	11.8747	11.7666	11.8396	11.9162	13.5545	13.963	11.1262	11.1731	13.0226	13.0314	12.0022	12.2889	10.7651	10.6455	11.3304	11.2971
7364	pig22335;pig22336		ENSSSCT00000007431		ENSSSCG00000006784	100153198	C1orf183	Uncharacterized protein C1orf183 [Source:UniProtKB/Swiss-Prot;Acc:Q9NTI7]	chrNA:-1--1	pig22335;pig22336	-0.302061	-7.34308	-0.747907	0.101852	0.594479	11.6464	11.4468	10.9719	10.9548	10.9295	11.132	11.2579	11.169	11.4446	11.4246	10.7077	10.7057	11.4327	10.9955	10.7957	10.7616	NaN	NaN	NaN	10.6948
9506	pig28638;pig28639	C1ORF35;C1orf35	ENSSSCT00000015282		ENSSSCG00000013991		C1orf35	Multiple myeloma tumor-associated protein 2 (hMMTAG2) [Source:UniProtKB/Swiss-Prot;Acc:Q9BU76]	chrNA:-1--1	pig28638;pig28639	-0.0720035	-3.76802	-0.514117	0.136442	0.703878	11.6792	11.5724	11.1904	11.0905	11.3235	11.565	11.1527	11.0712	11.6578	11.6366	11.0552	10.9146	11.6089	11.28	11.3228	11.1969	10.7317	10.7327	10.8489	11.2058
1651	pig03813;pig03814		ENSSSCT00000008152		ENSSSCG00000007448	100153945	C20orf123	Transmembrane protein C20orf123 [Source:UniProtKB/Swiss-Prot;Acc:Q9BR26]	chrNA:-1--1	pig03813;pig03814	-1.17495	-3.85221	-0.531085	0.137865	0.693519	11.4202	11.2849	10.8239	NaN	10.7729	11.0912	10.821	NaN	11.3462	11.1654	NaN	NaN	11.2061	NaN	10.9976	10.69	10.7509	10.6385	NaN	11.4006
4337	pig12996;pig12997		ENSSSCT00000008392		ENSSSCG00000007652		C7orf47	UPF0683 protein C7orf47 [Source:UniProtKB/Swiss-Prot;Acc:Q8TAP8]	chrNA:-1--1	pig12996;pig12997	-0.676032	-3.92569	-1.2835	0.326947	0.428192	13.3546	13.2154	11.6241	11.8176	12.4308	12.3416	11.7658	11.758	12.9991	12.9096	11.4417	11.3239	13.0314	12.204	12.2825	12.2965	NaN	NaN	10.758	11.3496
1954	pig04894;pig04895		ENSSSCT00000012231		ENSSSCG00000011169		C9orf21	UPF0308 protein C9orf21 [Source:UniProtKB/Swiss-Prot;Acc:Q7RTV5]	chrNA:-1--1	pig04894;pig04895	-1.09902	-3.83575	-0.481656	0.12557	0.71393	11.2843	11.175	10.9417	10.6226	11.1328	11.0602	11.072	10.7784	11.2824	10.9702	NaN	NaN	11.3572	10.6146	10.6995	10.6158	NaN	NaN	NaN	11.0013
2822	pig07911;pig07912	CACNA1C	ENSSSCT00000000827		ENSSSCG00000000763		CACNA1C	Voltage-dependent L-type calcium channel subunit alpha-1C (Voltage-gated calcium channel subunit alpha Cav1.2)(Calcium channel, L type, alpha-1 polypeptide, isoform 1, cardiac muscle) [Source:UniProtKB/Swiss-Prot;Acc:Q13936]	chrNA:-1--1	pig07911;pig07912	-0.918702	-4.1554	-0.692237	0.166587	0.619105	11.6768	11.404	11.0386	10.8002	11.29	11.4344	11.0438	10.8053	11.4889	11.2728	NaN	NaN	11.5034	10.7376	11.003	10.7913	10.5962	10.7018	10.9855	11.4269
12214	pig36467;pig36468	CALML4	ENSSSCT00000005471		ENSSSCG00000004959		CALML4	Calmodulin-like protein 4 (Serologically defined breast cancer antigen NY-BR-20) [Source:UniProtKB/Swiss-Prot;Acc:Q96GE6]	chrNA:-1--1	pig36467;pig36468	0.214166	-6.47601	-1.46791	0.226669	0.358643	13.5183	13.5467	11.9873	12.0878	11.8502	12.25	11.6145	11.6567	12.9361	13.1343	11.6822	11.6391	13.4916	13.4385	11.8483	12.0941	10.6148	10.7676	10.6443	10.8033
13583	pig11657	CAPZB;LOC100037956;LOC100037959	ENSSSCT00000003880|ENSSSCT00000003881	Ssc.51722|Ssc.22350	ENSSSCG00000003493	100037959|100134958	CAPZB	Capping protein (actin filament) muscle Z-line, beta|F-actin capping protein subunit beta 1	chrNA:-1--1	pig11657	0.365837	-3.77349	-0.664272	0.176037	0.638423	11.6121	11.6732	11.1133	11.0139	11.5363	11.492	11.1487	10.9999	11.7161	11.6992	10.7874	10.8074	11.6902	11.0985	11.3154	11.1333	10.6275	NaN	NaN	11.1443
6301	pig19147;pig19148		ENSSSCT00000017185	Ssc.15886	ENSSSCG00000015783	397244	CASP3	Caspase 3, apoptosis-related cysteine peptidase	chrNA:-1--1	pig19147;pig19148	-0.423765	-4.46837	-0.376843	0.0843357	0.769551	11.2319	11.0884	11.025	10.8317	10.8299	11.1212	10.8563	10.8032	11.1623	11.0793	NaN	NaN	11.2039	10.5881	10.7271	10.8033	NaN	NaN	10.7016	11.0669
5169	pig15591;pig15592		ENSSSCT00000013437		ENSSSCG00000012288		CCDC120	Coiled-coil domain-containing protein 120 [Source:UniProtKB/Swiss-Prot;Acc:Q96HB5]	chrNA:-1--1	pig15591;pig15592	-0.563352	-4.027	-0.440925	0.109492	0.735172	11.329	11.3694	11.1251	10.8814	10.9893	11.0318	11.1344	10.982	11.3424	11.1123	NaN	NaN	11.3913	NaN	10.8922	10.871	NaN	NaN	NaN	10.875
6062	pig18357;pig18358		ENSSSCT00000016787		ENSSSCG00000015412		CCDC146	Coiled-coil domain-containing protein 146 [Source:UniProtKB/Swiss-Prot;Acc:Q8IYE0]	chrNA:-1--1	pig18357;pig18358	-0.451856	-4.82862	-1.07675	0.222993	0.474241	12.4122	12.4174	10.9069	11.0278	11.3566	11.1314	11.1636	11.1144	11.887	12.1647	10.9588	10.9029	11.3379	11.2353	11.2987	11.4139	NaN	NaN	NaN	10.9787
930	pig01400;pig01401	CCDC56;Ccdc56	ENSSSCT00000018928	Ssc.3838	ENSSSCG00000017388		CCDC56	Transcribed locus, strongly similar to NP_001102517.1 coiled-coil domain containing 56 [Rattus norvegicus]	chrNA:-1--1	pig01400;pig01401	-1.41274	-4.08151	-1.01611	0.248953	0.500222	12.4621	12.3448	11.6932	11.4217	11.7119	11.8529	11.5362	11.4199	12.1263	11.9476	10.8731	11.0212	12.1682	11.3484	11.6423	11.2798	10.7343	10.5789	10.9927	11.8574
4796	pig14377;pig14378	CCT7	ENSSSCT00000009094	Ssc.11002	ENSSSCG00000008303		CCT7	Transcribed locus, strongly similar to NP_001026712.1 chaperonin containing TCP1, subunit 7 [Gallus gallus]	chrNA:-1--1	pig14377;pig14378	-0.612184	-6.39556	-1.17249	0.183329	0.447226	12.9175	12.8192	11.8012	11.5795	12.0527	12.2453	11.9318	11.8465	12.7205	12.6165	11.4126	11.4106	12.5194	11.8595	11.9264	11.634	NaN	NaN	NaN	11.4255
8613	pig26181;pig26182	CD151	ENSSSCT00000014035	Ssc.54395	ENSSSCG00000012840		CD151	Transcribed locus, strongly similar to NP_004348.2 CD151 antigen [Homo sapiens]	chrNA:-1--1	pig26181;pig26182	-0.166317	-3.70918	-0.865718	0.233399	0.558551	12.4501	12.6475	11.2169	11.3288	11.9646	11.5975	11.5971	11.6287	12.4032	12.7151	11.3896	11.426	12.4282	12.3595	11.825	12.1123	NaN	10.8516	10.9404	11.2219
12051	pig35975;pig35976	CDAN1	ENSSSCT00000005211		ENSSSCG00000004719		CDAN1	Codanin-1 [Source:UniProtKB/Swiss-Prot;Acc:Q8IWY9]	chrNA:-1--1	pig35975;pig35976	0.196662	-4.23338	-0.500404	0.118204	0.707297	11.8637	11.7959	11.5062	11.3304	11.2855	11.7081	11.4179	11.2987	11.8514	11.6544	11.1814	11.2174	11.5724	11.2169	11.4147	11.3502	10.959	10.9989	10.6365	11.438
16015	pig49412	CDC42EP3	Ssc#S35167785	Ssc.21846			CDC42EP3	Transcribed locus, strongly similar to NP_006440.2 Cdc42 effector protein 3 [Homo sapiens]	chrNA:-1--1	pig49412	0.672191	-4.95629	-0.783349	0.158052	0.582633	12.5567	12.8308	11.4604	11.4201	10.9852	11.291	11.8811	11.7367	12.553	12.7158	11.7704	11.735	12.0441	12.0421	11.8819	12.1355	10.9483	11.1216	11.3346	11.9327
2823	pig07913;pig07914		ENSSSCT00000000828		ENSSSCG00000000764		CECR5	Cat eye syndrome critical region protein 5 Precursor [Source:UniProtKB/Swiss-Prot;Acc:Q9BXW7]	chrNA:-1--1	pig07913;pig07914	-0.918481	-4.08594	-0.659393	0.161381	0.631421	11.6076	11.5397	11.1774	10.8365	11.404	11.6462	11.1065	10.9338	11.4158	11.1811	NaN	NaN	11.5122	10.9038	10.9764	10.7359	NaN	NaN	NaN	10.966
7938	pig24118;pig24119	CH242-196P11.8;MEA1	ENSSSCT00000001841	Ssc.15581	ENSSSCG00000001655		MEA1	Transcribed locus, strongly similar to NP_055438.1 male-enhanced antigen [Homo sapiens]	chrNA:-1--1	pig24118;pig24119	-0.238591	-3.76303	-1.1829	0.314348	0.444195	13.8695	13.6109	12.4733	12.1713	12.8368	13.0715	12.1678	12.0117	13.3931	13.0401	11.991	11.9239	13.5252	12.7142	12.7745	12.4925	11.0689	11.1489	NaN	11.705
768	pig00874;pig00875	CHMP6	ENSSSCT00000018659	Ssc.24036	ENSSSCG00000017140		CHMP6	Transcribed locus, strongly similar to NP_078867.2 chromatin modifying protein 6 [Homo sapiens]	chrNA:-1--1	pig00874;pig00875	-1.48826	-4.04808	-0.591674	0.146161	0.666939	11.3749	11.4063	11.2519	11.0211	11.484	11.492	11.3613	11.1996	11.5307	11.5181	10.6426	10.7889	11.764	10.8037	11.0538	10.9781	NaN	NaN	10.6641	11.0249
8014	pig24372;pig24373	CIB2;LOC100156043	ENSSSCT00000001970	Ssc.21853	ENSSSCG00000001762	100156043	CIB2	Calcium and integrin binding family member 2	chrNA:-1--1	pig24372;pig24373	-0.230314	-5.73893	-1.12559	0.196132	0.461241	12.6335	12.3246	10.9683	10.6604	11.0153	11.5831	11.5186	11.3449	12.4628	12.2503	11.0804	11.1163	12.4368	11.7589	11.6219	11.3502	10.699	10.7121	10.7815	11.3597
14164	pig38419		Ssc#S35165470	Ssc.415		397264	CKM	Creatine kinase, muscle	chrNA:-1--1	pig38419	0.433804	-4.85301	-1.44447	0.297643	0.381911	12.6264	12.3019	10.7865	NaN	10.8033	11.2736	10.7173	10.6585	12.5301	12.4282	10.6257	10.5982	12.8344	12.3702	11.3523	11.5325	12.0634	12.3696	15.4658	15.4658
9225	pig27826;pig27827	CNN1	ENSSSCT00000014869	Ssc.9013	ENSSSCG00000013614	396911	CNN1	Calponin 1, basic, smooth muscle	chrNA:-1--1	pig27826;pig27827	-0.101197	-10.4688	-3.79462	0.362469	0.0768322	15.5059	15.3703	11.0592	10.9028	11.1246	11.5398	12.9733	12.843	15.3075	15.1726	10.9873	11.0304	14.7435	14.2201	12.1081	12.052	10.5925	10.6568	NaN	11.1441
13822	pig23819;pig23820		ENSSSCT00000001673|ENSSSCT00000001672		ENSSSCG00000001500	100155001	COL21A1	Collagen alpha-1(XXI) chain Precursor [Source:UniProtKB/Swiss-Prot;Acc:Q96P44]	chrNA:-1--1	pig23819;pig23820	0.39362	-6.77957	-1.11777	0.164873	0.457525	12.0911	12.3254	10.6747	10.7017	11.6967	11.77	11.2065	11.1153	11.855	11.8802	10.9596	11.021	12.1769	11.8767	10.7936	10.9064	NaN	NaN	10.6224	10.6079
1562	pig03529	CPNE1	ENSSSCT00000007994	Ssc.11090	ENSSSCG00000007306	100233174	CPNE1	Copine I	chrNA:-1--1	pig03529	-1.19881	-4.12369	-0.894347	0.21688	0.533322	12.8845	12.743	13.1737	12.4038	12.402	12.492	13.0768	12.789	12.4027	12.2645	11.7608	11.5506	12.7745	11.9183	11.9017	11.5042	11.4415	11.1029	11.0032	12.8205
13428	pig03527;pig03528	CPNE1	ENSSSCT00000007993|ENSSSCT00000007994	Ssc.11090	ENSSSCG00000007306	100233174	CPNE1	Copine I|Copine I [Source:UniProtKB/TrEMBL;Acc:B8XSK0]	chrNA:-1--1	pig03527;pig03528	0.348345	-4.73567	-0.941193	0.198745	0.519089	12.8174	12.5996	11.9017	11.5905	11.8371	12.1067	11.925	11.6607	12.3973	12.2771	11.4493	11.6403	12.5544	11.537	11.831	11.406	10.9975	10.8305	NaN	11.1439
2941	pig08392;pig08393		ENSSSCT00000001071		ENSSSCG00000000981		CRELD2	Cysteine-rich with EGF-like domain protein 2 Precursor [Source:UniProtKB/Swiss-Prot;Acc:Q6UXH1]	chrNA:-1--1	pig08392;pig08393	-0.896933	-4.00025	-0.468399	0.117092	0.722907	11.0393	11.0822	11.0271	10.93	11.4089	11.1597	10.9805	10.7605	11.2277	11.2319	NaN	NaN	11.4645	10.6679	10.7043	10.8108	NaN	NaN	NaN	10.8072
683	pig00620;pig00621	CRHR2	ENSSSCT00000018155		ENSSSCG00000016675		CRHR2	Corticotropin-releasing factor receptor 2 Precursor (CRF-R 2)(CRF2)(Corticotropin-releasing hormone receptor 2)(CRH-R 2) [Source:UniProtKB/Swiss-Prot;Acc:Q13324]	chrNA:-1--1	pig00620;pig00621	-1.53289	-4.8709	-0.703388	0.144406	0.617968	11.7122	11.6133	11.1977	10.9764	11.3254	11.4984	11.2179	11.0184	11.6691	11.6114	NaN	NaN	11.6941	10.8313	11.1483	11.0758	10.6993	NaN	10.8298	11.4973
7755	pig23571;pig23572	CSNK2B	ENSSSCT00000001551	Ssc.32215	ENSSSCG00000001414	397211	CSNK2B	Casein kinase 2, beta polypeptide	chrNA:-1--1	pig23571;pig23572	-0.258437	-4.07936	-1.68948	0.414153	0.330441	14.0902	14.0019	12.0028	11.8969	12.644	12.8011	12.0098	11.9395	13.6473	13.4497	11.5613	11.4908	13.5044	12.8966	12.6353	12.7438	10.7715	10.639	NaN	11.1314
9967	pig30040;pig30041	CTDSPL	ENSSSCT00000012314		ENSSSCG00000011247		CTDSPL	CTD small phosphatase-like protein (CTDSP-like)(EC 3.1.3.-)(Small C-terminal domain phosphatase 3)(Small CTD phosphatase 3)(SCP3)(Nuclear LIM interactor-interacting factor 1)(NLI-interacting factor 1)(NIF-like protein)(RBSP3)(Protein YA22)(hYA22) [Source:UniProtKB/Swiss-Prot;Acc:O15194]	chrNA:-1--1	pig30040;pig30041	-0.0231825	-3.76802	-0.694252	0.184248	0.614227	12.4809	12.0787	11.1407	10.9726	11.6602	12.0145	12.6061	12.3536	12.6462	12.3973	11.5981	11.6437	12.8536	12.1165	11.9168	11.6676	10.9387	10.9998	12.2093	12.9204
7847	pig23843;pig23844		ENSSSCT00000001685		ENSSSCG00000001512	100152220	CUTA	Protein CutA Precursor (Brain acetylcholinesterase putative membrane anchor)(Acetylcholinesterase-associated protein) [Source:UniProtKB/Swiss-Prot;Acc:O60888]	chrNA:-1--1	pig23843;pig23844	-0.248541	-3.76998	-1.28919	0.341962	0.419366	13.4195	13.3175	11.6672	11.5181	11.7802	12.3477	11.568	11.4503	12.8723	12.757	11.4232	11.3254	12.7142	12.1317	12.2365	12.2244	NaN	NaN	NaN	11.3811
3649	pig10853;pig10854	CYTH2	ENSSSCT00000003477	Ssc.1619	ENSSSCG00000003136	100240721	CYTH2	Cytohesin 2	chrNA:-1--1	pig10853;pig10854	-0.777963	-4.55649	-0.941845	0.206704	0.526188	13.1343	12.9709	11.903	11.527	12.5078	12.6727	12.3322	12.0396	12.9941	12.7702	11.7439	11.8271	12.9765	12.1778	12.3412	12.1898	11.2495	11.069	10.9352	12.1651
16485	pig53089	D4S234E	Ssc#S23213137	Ssc.26968			D4S234E	Transcribed locus, strongly similar to NP_055207.1 brain neuron cytoplasmic protein 1 [Homo sapiens]	chrNA:-1--1	pig53089	0.741159	-4.65063	-0.627967	0.135028	0.645609	11.698	12.0229	11.2011	11.0114	11.4011	11.8846	11.3607	11.0953	11.7822	11.7215	11.2436	11.2803	11.3134	11.1124	11.0669	11.1219	11.7748	11.8389	10.9275	11.1263
1952	pig04886;pig04887	DIP2C	ENSSSCT00000012227		ENSSSCG00000011165		DIP2C	Disco-interacting protein 2 homolog C (DIP2 homolog C) [Source:UniProtKB/Swiss-Prot;Acc:Q9Y2E4]	chrNA:-1--1	pig04886;pig04887	-1.09943	-4.5388	-0.798726	0.175977	0.579138	11.675	11.6762	11.0444	10.6822	11.5062	11.3422	11.1351	10.8285	11.706	11.4453	NaN	NaN	11.6506	10.9429	11.1511	10.8297	10.6392	10.8959	11.079	11.2807
15648	pig47339	DISP1	Ssc#S35170268	Ssc.17915			DISP1	Transcribed locus, strongly similar to NP_116279.2 dispatched A [Homo sapiens]	chrNA:-1--1	pig47339	0.621117	-5.59787	-1.00697	0.179885	0.495719	12.6686	12.6438	11.2794	11.3724	10.9057	11.192	11.6436	11.6337	12.2743	12.2908	11.4741	11.466	11.7678	11.7368	11.2583	11.6512	10.895	11.2693	NaN	11.989
14537	pig40061	DNAJB6	Ssc#S35166597	Ssc.4058			DNAJB6	Transcribed locus, strongly similar to NP_490647.1 DnaJ (Hsp40) homolog, subfamily B, member 6 isoform a [Homo sapiens]	chrNA:-1--1	pig40061	0.478842	-10.3455	-2.00898	0.194189	0.245364	13.7064	13.5044	11.335	11.0954	11.386	11.8046	13.0201	12.7067	14.1717	13.7854	11.7262	11.748	13.3159	12.7161	11.721	11.9367	10.7164	10.755	11.0121	13.0837
7426	pig22529;pig22530	DPYD	ENSSSCT00000007532	Ssc.153	ENSSSCG00000006878	397109	DPYD	Dihydropyrimidine dehydrogenase	chrNA:-1--1	pig22529;pig22530	-0.295143	-4.45368	-0.630229	0.141508	0.643752	12.1182	12.1486	11.9104	11.6173	11.4031	11.7272	11.8325	11.6737	11.8405	11.8428	11.2867	11.2687	11.8865	11.3809	11.4311	11.4427	10.7414	10.6592	10.6237	11.4452
16122	pig50180	DYNLT3	Ssc#S35167999	Ssc.22986			DYNLT3	Transcribed locus, strongly similar to NP_006511.1 dynein, light chain, Tctex-type 3 [Homo sapiens]	chrNA:-1--1	pig50180	0.687361	-3.98679	-0.916275	0.229828	0.524275	14.0866	13.9891	12.8816	13.0201	12.5051	12.7847	12.9371	12.8597	13.4442	13.5664	12.8024	12.7908	13.1517	13.0886	12.6914	13.1366	11.6313	12.408	10.7858	11.4448
6229	pig18872;pig18873		ENSSSCT00000017046		ENSSSCG00000015649		DYRK3	Dual specificity tyrosine-phosphorylation-regulated kinase 3 (EC 2.7.12.1)(Regulatory erythroid kinase)(REDK) [Source:UniProtKB/Swiss-Prot;Acc:O43781]	chrNA:-1--1	pig18872;pig18873	-0.432153	-4.76522	-0.745481	0.156442	0.597908	11.6312	11.8153	10.7999	10.8959	11.086	11.109	10.9786	10.9825	11.6163	11.8887	NaN	NaN	11.5261	11.2095	11.0272	11.2281	NaN	NaN	10.6477	10.9842
8738	pig26499;pig26500	EHBP1L1	ENSSSCT00000014198		ENSSSCG00000012988		EHBP1L1	EH domain-binding protein 1-like protein 1 [Source:UniProtKB/Swiss-Prot;Acc:Q8N3D4]	chrNA:-1--1	pig26499;pig26500	-0.153221	-4.04057	-0.816426	0.202057	0.573273	11.9895	11.8544	10.9999	10.906	11.099	11.5065	10.9931	10.9329	11.6687	11.693	10.738	10.756	11.6286	11.0598	11.2025	11.2434	10.5869	10.7055	11.0214	11.2726
4967	pig14919;pig14920	EMILIN1	ENSSSCT00000009362	Ssc.38677	ENSSSCG00000008557		EMILIN1	Transcribed locus, strongly similar to NP_008977.1 elastin microfibril interfacer 1 precursor [Homo sapiens]	chrNA:-1--1	pig14919;pig14920	-0.589684	-5.45628	-0.983592	0.180268	0.507509	13.2189	12.9175	11.8703	11.7314	12.018	12.0902	12.4112	12.1977	13.0009	12.8457	12.1651	12.2185	12.8933	12.2652	11.9024	11.7626	11.1038	11.1336	NaN	12.3717
3841	pig11413;pig11414	ENO1	ENSSSCT00000003760		ENSSSCG00000003389		ENO1	Alpha-enolase (EC 4.2.1.11)(2-phospho-D-glycerate hydro-lyase)(Non-neural enolase)(NNE)(Enolase 1)(Phosphopyruvate hydratase)(C-myc promoter-binding protein)(MBP-1)(MPB-1)(Plasminogen-binding protein) [Source:UniProtKB/Swiss-Prot;Acc:P06733]	chrNA:-1--1	pig11413;pig11414	-0.749004	-4.6197	-1.09741	0.23755	0.477029	12.5725	12.3877	12.157	11.8712	12.0851	12.1817	11.2555	11.1044	12.5416	12.2622	11.0714	11.1207	12.8059	12.1578	11.8511	11.3312	10.8273	10.7952	10.76	11.0638
6805	pig20721;pig20722	ENPP2	ENSSSCT00000006585	Ssc.5142	ENSSSCG00000006001		ENPP2	Transcribed locus, strongly similar to NP_001035181.1 autotaxin isoform 2 preproprotein [Homo sapiens]	chrNA:-1--1	pig20721;pig20722	-0.364802	-3.94109	-0.655354	0.166288	0.632298	12.9765	12.7164	11.4443	11.4094	11.3536	11.8447	11.6754	11.4965	12.6516	12.4925	11.9747	11.9323	12.6695	12.1186	12.2342	12.0744	NaN	NaN	10.7138	11.2644
4892	pig14651;pig14652	EPCAM	ENSSSCT00000009230	Ssc.51858	ENSSSCG00000008429	403163	EPCAM	Epithelial cell adhesion molecule	chrNA:-1--1	pig14651;pig14652	-0.599642	-4.01142	-0.472738	0.117848	0.719629	11.2502	11.1519	11.0323	10.7384	11.2897	11.3308	10.9578	10.7064	11.2547	10.9988	NaN	10.5853	11.3008	10.5933	10.7831	10.6848	10.731	10.6131	10.581	11.0136
681	pig00616;pig00617	FAM188B	ENSSSCT00000018153	Ssc.39025	ENSSSCG00000016674		FAM188B	Transcribed locus, moderately similar to NP_115598.2 hypothetical protein LOC84182 [Homo sapiens]	chrNA:-1--1	pig00616;pig00617	-1.53397	-4.53433	-0.631189	0.139202	0.646757	11.3485	11.3658	10.9168	10.908	11.3868	11.4867	11.2772	11.0775	11.5595	11.5476	NaN	10.654	11.8284	10.8762	11.0112	10.8548	10.6334	NaN	10.9001	11.291
7493	pig22778;pig22779	FARS2;Fars2	ENSSSCT00000001108	Ssc.54732	ENSSSCG00000001016		FARS2	Transcribed locus, moderately similar to NP_001013157.1 phenylalanyl-tRNA synthetase 2, mitochondrial precursor [Rattus norvegicus]	chrNA:-1--1	pig22778;pig22779	-0.287741	-4.21438	-0.376764	0.0893996	0.770093	11.3534	11.2193	11.0561	10.8812	10.9896	11.338	11.1072	10.9933	11.3419	11.2615	10.872	10.8588	11.3273	10.8843	10.9754	10.9628	NaN	NaN	10.913	11.3819
6795	pig20683;pig20684		ENSSSCT00000006564	Ssc.4368	ENSSSCG00000005981	733657	FBXO32	F-box protein 32	chrNA:-1--1	pig20683;pig20684	-0.365962	-6.00696	-2.44939	0.407758	0.200388	13.898	13.8037	11.0339	11.1259	11.1768	11.3497	12.6491	12.6546	13.9122	14.0437	10.847	10.8668	13.3433	13.1295	11.8884	12.2578	NaN	NaN	10.6769	11.2016
2951	pig08413;pig08414		ENSSSCT00000009496		ENSSSCG00000008679		FGFR3	Fibroblast growth factor receptor 3 Precursor (FGFR-3)(EC 2.7.10.1)(CD333 antigen) [Source:UniProtKB/Swiss-Prot;Acc:P22607]	chrNA:-1--1	pig08413;pig08414	-0.895197	-3.9691	-0.44903	0.113131	0.732791	11.1765	11.2085	10.9904	10.7398	11.2285	11.2747	11.0801	10.8341	11.3161	11.0958	NaN	NaN	11.3857	NaN	10.8974	10.7313	NaN	NaN	NaN	10.8968
15646	pig47322;pig47323	FHOD3	Ssc#S35169093	Ssc.17896			FHOD3	Transcribed locus, strongly similar to NP_079411.2 formin homology 2 domain containing 3 [Homo sapiens]	chrNA:-1--1	pig47322;pig47323	0.620861	-12.7387	-1.7821	0.139897	0.292126	13.1755	13.3475	10.7625	10.9526	11.1392	11.3668	11.7333	11.729	13.2551	13.2985	11.3573	11.3689	12.7702	12.7515	11.4885	11.7335	11.9934	12.8572	13.365	13.7899
18305	pig71983;pig71984	FILIP1	Ssc#S22315372	Ssc.49889			FILIP1	Transcribed locus, strongly similar to NP_056502.1 filamin A interacting protein 1 [Homo sapiens]	chrNA:-1--1	pig71983;pig71984	1.07128	-3.88541	-0.621841	0.160045	0.649182	11.4593	11.4874	10.8821	10.7172	11.0471	11.3087	10.9255	10.8166	11.7805	11.7581	11.0158	10.8649	11.2246	11.2538	10.9095	11.2078	10.9376	10.8482	11.0643	10.9915
18822	pig76219	FLNA	Ssc#S35173713	Ssc.55452		733585	FLNA	Filamin A, alpha	chrNA:-1--1	pig76219	1.20021	-4.61887	-1.54999	0.335578	0.327905	12.4545	12.3518	11.2985	11.0058	11.1637	10.9187	12.1592	12.2509	13.5056	12.8531	11.5053	11.3997	12.7956	12.7067	11.0882	10.9719	11.0133	11.1093	10.714	10.8743
8463	pig25716;pig25717	FOXN3	ENSSSCT00000002698	Ssc.26309	ENSSSCG00000002429	733584	FOXN3	Forkhead box N3	chrNA:-1--1	pig25716;pig25717	-0.182221	-5.38225	-0.384541	0.0714462	0.765912	11.7852	11.8671	11.4679	11.4397	11.2627	11.5513	11.7776	11.647	11.7721	11.8121	11.3991	11.4571	11.6455	11.3313	11.4455	11.3966	10.9289	10.8559	11.0934	12.0943
15928	pig48896	GADD45A	Ssc#S33578949	Ssc.20913		733669	GADD45A	Growth arrest and DNA-damage-inducible, alpha	chrNA:-1--1	pig48896	0.659646	-6.25601	-1.27048	0.203081	0.409453	12.9432	12.6788	11.4656	11.6096	11.0896	11.4245	12.7456	12.5643	12.3099	12.3935	11.3447	11.33	12.1831	12.008	11.1318	11.4369	NaN	10.9007	10.6724	11.3976
535	pig00125;pig00126		ENSSSCT00000017908		ENSSSCG00000016446		GIMAP6	GTPase IMAP family member 6 (Immunity-associated nucleotide 6 protein)(hIAN6)(hIAN2) [Source:UniProtKB/Swiss-Prot;Acc:Q6P9H5]	chrNA:-1--1	pig00125;pig00126	-1.62513	-5.48394	-0.369947	0.0674602	0.77376	11.1576	11.0942	11.1992	10.897	10.8738	11.3411	10.9915	10.7263	11.1713	11.1282	NaN	NaN	11.1669	NaN	10.803	10.7585	NaN	NaN	NaN	10.6437
6156	pig18645;pig18646	GLUL	ENSSSCT00000016935		ENSSSCG00000015545		GLNA	Glutamine synthetase (GS)(EC 6.3.1.2)(Glutamate--ammonia ligase) [Source:UniProtKB/Swiss-Prot;Acc:P46410]	chrNA:-1--1	pig18645;pig18646	-0.440843	-5.28382	-0.938341	0.177588	0.526884	12.4703	12.3049	11.2897	11.1897	11.8849	11.6671	11.3372	11.1032	12.3303	12.2656	11.1195	11.2775	11.8665	11.3643	11.6562	11.5646	10.8531	10.8098	11.0479	11.3258
10080	pig30361;pig30362	GNAI2	ENSSSCT00000012477	Ssc.841	ENSSSCG00000011399	397523	GNAI2	Guanine nucleotide binding protein (G protein), alpha inhibiting activity polypeptide 2	chrNA:-1--1	pig30361;pig30362	-0.0111887	-5.29948	-1.5603	0.294425	0.353832	14.6847	14.653	13.2737	13.4727	13.1379	13.3612	13.1152	13.0701	14.4939	14.585	12.6558	12.6158	14.2639	13.9978	13.2833	13.6204	11.1388	11.5807	10.9584	12.1292
10319	pig31028;pig31029	GYG1	ENSSSCT00000012806		ENSSSCG00000011698		GYG1	Glycogenin-1 (EC 2.4.1.186) [Source:UniProtKB/Swiss-Prot;Acc:P46976]	chrNA:-1--1	pig31028;pig31029	0.0132772	-7.6056	-1.83073	0.240708	0.287034	13.6566	13.6501	11.6786	11.7773	11.2458	11.4194	12.5429	12.5316	13.3696	13.6291	11.4291	11.4443	12.7467	12.7919	11.957	12.1522	10.9083	10.9867	10.7676	12.1801
11024	pig33004;pig33005		ENSSSCT00000011079		ENSSSCG00000010118		HIRA	Protein HIRA (TUP1-like enhancer of split protein 1) [Source:UniProtKB/Swiss-Prot;Acc:P54198]	chrNA:-1--1	pig33004;pig33005	0.0877179	-4.00608	-0.443069	0.110599	0.734143	11.3186	11.1805	10.8772	10.7013	10.7651	11.171	11.288	11.1597	11.4613	11.2663	10.9041	10.92	11.3981	10.8291	10.8071	10.8232	NaN	NaN	NaN	10.781
17598	pig65824	HIST1H2BC;HIST1H2BE;HIST1H2BG;Hist1h2bc;Hist1h2be;Hist1h2bg	Ssc#S35166381	Ssc.42354			HIST1H2BC	Transcribed locus, strongly similar to NP_835503.1 histone cluster 1, H2bg [Mus musculus]	chrNA:-1--1	pig65824	0.926402	-4.10931	-1.2097	0.294381	0.427106	12.682	12.5023	11.435	10.7915	11.889	10.9082	12.4326	12.4721	13.3902	12.7067	11.608	11.607	12.4197	12.5835	11.9924	11.2351	12.1977	12.1525	11.9355	12.4814
15737	pig47874;pig47875	HMGN1	Ssc#S35169499	Ssc.18709			HMGN1	Transcribed locus, strongly similar to NP_004956.5 high-mobility group nucleosome binding domain 1 [Homo sapiens]	chrNA:-1--1	pig47874;pig47875	0.633344	-5.06314	-0.945662	0.186774	0.519565	14.2753	14.05	12.1039	12.2261	12.6947	13.1138	13.203	13.1	13.9085	13.838	13.1814	13.0429	13.5328	13.3433	12.795	13.2699	11.003	11.2887	10.8562	11.3945
1483	pig03247;pig03248	IDH3B	ENSSSCT00000007846	Ssc.3464	ENSSSCG00000007173	733641	IDH3B	Isocitrate dehydrogenase 3 (NAD+) beta	chrNA:-1--1	pig03247;pig03248	-1.22119	-4.24693	-0.513682	0.120954	0.702257	12.2078	12.2414	12.3917	12.1086	12.0613	12.106	12.3595	12.0503	12.187	12.0865	11.5982	11.6639	12.3835	11.5049	11.858	11.5479	10.8291	10.7822	11.3794	12.0988
3073	pig08951;pig08952	IGFBP7	ENSSSCT00000009759		ENSSSCG00000008913		IGFBP7	Insulin-like growth factor-binding protein 7 Precursor (IGF-binding protein 7)(IGFBP-7)(IBP-7)(MAC25 protein)(Prostacyclin-stimulating factor)(PGI2-stimulating factor)(IGFBP-rP1)(Tumor-derived adhesion factor)(TAF) [Source:UniProtKB/Swiss-Prot;Acc:Q16270]	chrNA:-1--1	pig08951;pig08952	-0.873671	-5.36525	-1.19304	0.222364	0.431328	13.7638	13.7333	12.3622	12.0112	12.3965	12.216	12.901	12.6393	13.4105	13.0782	12.1629	12.356	13.2699	12.4069	12.489	12.2056	11.2023	11.0771	11.382	12.4657
2824	pig07915;pig07916		ENSSSCT00000000829		ENSSSCG00000000765		IL17RA	Interleukin-17 receptor A Precursor (IL-17 receptor)(CDw217)(CD217 antigen) [Source:UniProtKB/Swiss-Prot;Acc:Q96F46]	chrNA:-1--1	pig07915;pig07916	-0.91828	-3.98626	-0.699097	0.175376	0.61647	11.6693	11.4814	11.0693	10.7555	11.2069	11.404	11.0775	10.7007	11.5713	11.2471	NaN	NaN	11.4358	10.6048	11.0714	10.7331	10.6512	10.6356	10.6049	11.1819
15275	pig45174	ILK	Ssc#S35169224	Ssc.12892			ILK	Transcribed locus, strongly similar to NP_004508.1 integrin-linked kinase [Homo sapiens]	chrNA:-1--1	pig45174	0.571791	-5.40817	-0.901836	0.166755	0.537764	12.1813	11.9647	11.2919	11.4285	10.9178	11.09	11.5532	11.3855	12.14	12.2754	11.1318	11.0504	11.8044	11.6568	11.2516	11.5203	10.6345	10.6928	10.8134	11.2466
2017	pig05155;pig05156		ENSSSCT00000018391	Ssc.16218	ENSSSCG00000016887	397483	ITGA2	Integrin, alpha 2 (CD49B, alpha 2 subunit of VLA-2 receptor)	chrNA:-1--1	pig05155;pig05156	-1.08439	-4.222	-0.565685	0.133985	0.674456	11.4044	11.2656	10.9561	10.7197	11.3545	11.2021	10.9239	10.6173	11.3575	11.0773	NaN	NaN	11.4206	10.6566	10.8628	10.6392	10.6095	NaN	10.8712	11.1403
4144	pig12390;pig12391	C-JUN	ENSSSCT00000004238		ENSSSCG00000003829		JUN	Transcription factor AP-1 (Activator protein 1)(AP1)(Proto-oncogene c-jun)(V-jun avian sarcoma virus 17 oncogene homolog) [Source:UniProtKB/Swiss-Prot;Acc:P56432]	chrNA:-1--1	pig12390;pig12391	-0.703882	-3.87026	-2.56127	0.661783	0.217711	15.228	15.2912	12.637	13.0472	13.8195	13.7395	13.2473	13.4776	15.4217	15.5602	11.7759	11.7628	14.4976	14.58	13.603	14.1143	10.797	10.8046	10.8282	12.3737
12402	pig37035;pig37036		ENSSSCT00000005768		ENSSSCG00000005234	100154326	KANK1	KN motif and ankyrin repeat domain-containing protein 1 (Ankyrin repeat domain-containing protein 15)(Kidney ankyrin repeat-containing protein) [Source:UniProtKB/Swiss-Prot;Acc:Q14678]	chrNA:-1--1	pig37035;pig37036	0.234265	-17.1157	-2.09929	0.122653	0.233658	13.3944	13.3236	10.8848	10.8833	11.7191	12.2872	12.3859	12.1805	13.4325	13.2211	11.1341	11.1399	12.9888	12.6091	11.3346	11.3659	NaN	NaN	NaN	10.6385
16649	pig54152	KCNA5	Ssc#S22317516	Ssc.28460		474166	KCNA5	Potassium voltage-gated channel, shaker-related subfamily, member 5	chrNA:-1--1	pig54152	0.76542	-15.0096	-2.23555	0.148941	0.213534	13.2497	13.1034	10.8346	10.9602	10.8259	11.2264	13.2922	13.0176	13.1935	13.0802	10.8188	10.7347	11.8286	11.6067	10.9575	11.1736	12.2759	12.6705	13.391	13.0525
17641	pig66048		Ssc#S33389640	Ssc.42670		100125830	KCNAB1	Potassium voltage-gated channel, shaker-related subfamily, beta member 1	chrNA:-1--1	pig66048	0.934352	-6.51899	-1.49156	0.228802	0.347753	13.1305	12.7049	NaN	NaN	11.0141	11.1228	13.4222	13.1844	13.568	13.0053	11.6773	11.5144	12.7839	12.6304	11.6759	11.5751	NaN	NaN	NaN	NaN
4973	pig14931;pig14932	KCNK3	ENSSSCT00000009368		ENSSSCG00000008563		KCNK3	Potassium channel subfamily K member 3 (Acid-sensitive potassium channel protein TASK-1)(TWIK-related acid-sensitive K(+) channel 1)(Two pore potassium channel KT3.1) [Source:UniProtKB/Swiss-Prot;Acc:O14649]	chrNA:-1--1	pig14931;pig14932	-0.588983	-4.3478	-0.743567	0.171021	0.59913	12.2989	12.1979	11.7317	11.5099	11.9762	12.1988	11.9987	11.8967	12.0922	11.9379	11.2646	11.2548	12.1573	11.4726	11.6783	11.3548	10.9738	11.0312	NaN	11.3207
2084	pig05397;pig05398	KCNMB1	ENSSSCT00000018517	Ssc.10064	ENSSSCG00000017005	100271876	KCNMB1	Potassium large conductance calcium-activated channel, subfamily M, beta member 1	chrNA:-1--1	pig05397;pig05398	-1.06905	-5.22613	-0.485761	0.0929485	0.71456	11.7836	11.6726	11.8096	11.7716	11.5206	11.6499	11.7137	11.5717	11.7852	11.7381	11.1424	11.2889	12.0087	10.9822	11.3202	11.2849	10.6225	NaN	10.9592	11.3275
14635	pig40544	KCTD10;Kctd10	Ssc#S35168643	Ssc.4963			KCTD10	Transcribed locus, strongly similar to NP_001009973.1 potassium channel tetramerization domain containing 10 [Rattus norvegicus]	chrNA:-1--1	pig40544	0.49077	-4.5086	-0.807943	0.1792	0.576037	12.9103	12.9561	11.2787	11.3314	11.3178	11.6178	12.3734	12.3904	12.693	12.8077	11.8957	11.8453	12.3424	12.2318	12.0152	12.3791	10.8033	10.7982	10.9815	11.1837
3646	pig10845;pig10846	KDELR1;Kdelr1	ENSSSCT00000003473	Ssc.16606	ENSSSCG00000003132		KDELR1	Transcribed locus, strongly similar to NP_001017385.1 KDEL (Lys-Asp-Glu-Leu) endoplasmic reticulum protein retention receptor 1 [Rattus norvegicus]	chrNA:-1--1	pig10845;pig10846	-0.778419	-3.68447	-0.699537	0.189861	0.624083	11.8702	11.8312	11.2422	10.9907	11.4631	11.6747	11.2651	11.0321	11.904	11.7409	10.9011	10.9065	11.9703	11.1203	11.4661	11.2746	10.7548	10.7478	NaN	10.9025
18039	pig70049;pig70050	KIAA0922	Ssc#S35169443	Ssc.47324			KIAA0922	Transcribed locus, moderately similar to NP_056011.3 hypothetical protein LOC23240 isoform 2 [Homo sapiens]	chrNA:-1--1	pig70049;pig70050	1.01358	-3.75044	-0.5935	0.158248	0.665326	11.7071	11.581	10.9151	10.8617	10.7532	11.257	11.3745	11.305	11.8483	11.8277	11.1525	11.0434	11.4334	11.339	10.983	11.4111	10.8999	11.0083	10.5802	10.7612
4097	pig12211;pig12212		ENSSSCT00000004149		ENSSSCG00000003747		KIAA1328	Uncharacterized protein KIAA1328 [Source:UniProtKB/Swiss-Prot;Acc:Q86T90]	chrNA:-1--1	pig12211;pig12212	-0.710679	-4.09912	-0.610157	0.148851	0.658709	11.5309	11.641	11.3089	11.14	11.4284	11.3296	11.2972	11.2165	11.533	11.4465	10.7309	10.8091	11.5903	10.7374	11.1454	11.0253	NaN	NaN	NaN	10.869
14014	pig32683;pig32684	KIAA1671;LOC100152213	ENSSSCT00000010908|ENSSSCT00000010907		ENSSSCG00000009953	100152213	KIAA1671	Uncharacterized protein KIAA1671 [Source:UniProtKB/Swiss-Prot;Acc:Q9BY89]	chrNA:-1--1	pig32683;pig32684	0.416105	-4.07161	-1.01841	0.250125	0.505409	12.5875	12.5051	11.2501	11.2427	11.1403	11.1424	11.9507	11.8813	12.2365	12.4568	11.1776	11.1235	12.0897	11.9267	11.454	11.9572	10.7945	10.8241	10.8846	11.1422
1866	pig04596;pig04597		ENSSSCT00000012069	Ssc.58789|Ssc.46657	ENSSSCG00000011027	595132	KIF5B	Transcribed locus, strongly similar to NP_476550.1 kinesin family member 5B [Rattus norvegicus]|Kinesin family member 5B	chrNA:-1--1	pig04596;pig04597	-1.11991	-3.94156	-0.354033	0.0898204	0.783347	11.113	11.0666	11.0813	10.8073	10.9671	11.1019	11.0558	10.8481	11.0764	11.1127	NaN	NaN	11.3487	NaN	10.6369	10.7782	NaN	NaN	NaN	10.6052
17755	pig66941	KLF6	Ssc#S46916721	Ssc.43880		100174961	KLF6	Kruppel-like factor 6	chrNA:-1--1	pig66941	0.955995	-4.67497	-1.18743	0.253997	0.444576	13.4727	13.2985	12.3217	12.4693	13.0063	12.9888	12.0903	12.4878	13.6791	13.8291	12.21	12.0289	13.1468	13.4222	12.8293	12.4614	11.6415	11.7046	11.3277	10.9956
16133	pig50262		Ssc#S46877613	Ssc.23247		100152091	LOC100152091	Similar to myosin light chain kinase	chrNA:-1--1	pig50262	0.688941	-9.69313	-2.29303	0.236562	0.205728	14.7991	14.5154	11.1046	10.6291	11.3894	11.6498	13.7517	13.5808	15.0599	14.7435	12.2473	12.1898	14.9904	14.6134	12.7691	12.7395	10.6256	10.5987	NaN	NaN
7500	pig22798;pig22799		ENSSSCT00000001119	Ssc.71560	ENSSSCG00000001026	100152326	LOC100152326	Similar to U11/U12 snRNP 48K	chrNA:-1--1	pig22798;pig22799	-0.286973	-4.0069	-0.443031	0.110567	0.737338	11.3188	11.2797	10.825	10.6077	11.0258	11.2215	10.8841	10.6362	11.3378	11.2356	NaN	NaN	11.2645	10.7075	11.0195	10.8253	NaN	NaN	NaN	11.1224
7208	pig21899;pig21900	LOC100152729;S100A2	ENSSSCT00000007208	Ssc.12269	ENSSSCG00000006580	100152729	LOC100152729	Similar to Protein S100-A2 (S100 calcium-binding protein A2) (Protein S-100L)	chrNA:-1--1	pig21899;pig21900	-0.31968	-16.629	-3.16205	0.190153	0.11113	14.268	14.1105	11.9265	11.9828	10.9101	10.8032	11.5034	11.8319	14.3289	14.6692	11.2388	11.321	14.2201	14.8022	11.2325	10.936	11.3666	11.003	10.8878	11.2789
16314	pig51817		Ssc#S46879159	Ssc.25072		100152915	LOC100152915	Hypothetical protein LOC100152915	chrNA:-1--1	pig51817	0.71536	-6.75853	-1.24005	0.183479	0.42881	12.7232	12.7811	10.8684	10.5931	10.9614	11.4609	11.9961	11.8621	12.7315	12.6491	11.3141	11.2079	12.4357	12.0852	11.5994	11.8033	NaN	NaN	NaN	NaN
7842	pig23829;pig23830		ENSSSCT00000001678	Ssc.21182	ENSSSCG00000001505	100152995	LOC100152995	Similar to Prefoldin subunit 6 (Protein Ke2)	chrNA:-1--1	pig23829;pig23830	-0.249039	-3.97388	-0.400463	0.100774	0.756358	11.7667	11.6507	11.7054	11.5887	11.177	11.5005	11.5206	11.3586	11.9013	11.8083	11.437	11.3687	11.6734	11.1712	11.3457	11.374	NaN	NaN	NaN	11.2114
19920	pig88383;pig88384	LOC100153014	Ssc#S46876786	Ssc.71596		100153014	LOC100153014	Similar to activating signal cointegrator 1 complex subunit 1	chrNA:-1--1	pig88383;pig88384	1.68132	-4.02977	-0.672714	0.166936	0.629089	12.2135	12.1706	11.3236	11.2535	11.9268	12.0555	11.0182	11.1994	11.8804	12.0619	11.3919	11.1782	12.2839	12.0318	11.416	11.6495	11.4056	11.6261	10.9125	10.7808
6311	pig19180;pig19181		ENSSSCT00000017200	Ssc.44282	ENSSSCG00000015797	100153277	LOC100153277	Similar to KIAA0777 protein	chrNA:-1--1	pig19180;pig19181	-0.422655	-9.21831	-2.45004	0.265779	0.185048	13.4984	13.2331	10.8964	NaN	11.1907	11.2647	12.4139	12.1522	13.7981	13.2737	NaN	10.674	12.4973	11.7538	11.0951	10.7713	10.7911	10.9221	11.0573	13.0715
16131	pig50245	LOC100153326	Ssc#S46877316	Ssc.23179		100153326	LOC100153326	Similar to inositol polyphosphate-5-phosphatase A	chrNA:-1--1	pig50245	0.688615	-12.6262	-2.36224	0.18709	0.19217	13.8321	13.6262	11.0527	10.7766	11.1135	11.4533	13.1844	12.8977	14.2721	13.9504	11.5537	11.5002	14.0361	13.3716	11.4963	11.6816	10.9643	11.0839	11.0337	12.9103
10612	pig31882;pig31883	LOC100153822;NFIL3	ENSSSCT00000010514	Ssc.16882	ENSSSCG00000009592	100153822	LOC100153822	Similar to Nuclear factor, interleukin 3 regulated	chrNA:-1--1	pig31882;pig31883	0.0445355	-4.11093	-0.610266	0.14845	0.65383	12.3184	12.0189	12.6741	12.6008	11.3825	11.5574	12.0582	11.7535	11.9405	12.0972	11.4038	11.4524	11.3193	10.911	11.4071	11.6708	10.7739	10.6648	NaN	12.0764
5105	pig15374;pig15375	LOC100153858;PDK3	ENSSSCT00000013325	Ssc.19740	ENSSSCG00000012181	100153858	LOC100153858	Similar to pyruvate dehydrogenase kinase, isozyme 3	chrNA:-1--1	pig15374;pig15375	-0.571666	-4.42931	-0.86864	0.196112	0.544141	12.2494	12.1975	12.1083	11.6917	11.5885	11.472	11.764	11.7208	12.0673	11.6848	11.1351	11.1901	11.8693	11.356	11.3933	11.0059	10.7631	10.8312	NaN	10.952
8468	pig25730;pig25731	CALM1;CALM2;CALM3;Calm1;Calm2;Calm3;LOC100154056	ENSSSCT00000002705	Ssc.61530|Ssc.11516	ENSSSCG00000002435	100154056	LOC100154056	Transcribed locus, strongly similar to NP_031615.1 calmodulin 2 [Mus musculus]|Similar to calmodulin	chrNA:-1--1	pig25730;pig25731	-0.181667	-4.41989	-0.899772	0.203573	0.538716	13.4264	13.3433	12.6764	12.444	12.9941	13.2453	13.0648	12.8132	13.1231	13.0186	12.1497	12.0709	13.7517	13.1366	12.5603	12.5316	10.9182	10.9672	10.8342	11.3183
15790	pig48208		Ssc#S46877158	Ssc.19163		100154269	LOC100154269	Similar to MAX interactor 1	chrNA:-1--1	pig48208	0.64053	-4.86641	-1.01189	0.207934	0.487832	13.0581	12.6526	10.8529	NaN	11.8067	12.306	12.3717	11.9619	13.4026	12.9112	12.0057	11.932	13.2631	12.5078	12.1155	11.9238	NaN	NaN	NaN	10.7712
11499	pig34319;pig34320	LOC100154421	ENSSSCT00000011751	Ssc.20400	ENSSSCG00000010739	100154421	LOC100154421	Similar to ribeye	chrNA:-1--1	pig34319;pig34320	0.137847	-5.38614	-2.11337	0.392371	0.250291	15.0999	14.9226	12.0139	11.9947	13.2134	13.3917	12.7329	12.4552	14.838	14.8476	12.1747	12.2815	14.1967	13.7755	13.289	13.5095	11.204	11.6005	11.4088	12.6378
15420	pig46327		Ssc#S40559849	Ssc.15276		100154721	LOC100154721	Similar to adipose specific 2	chrNA:-1--1	pig46327	0.590734	-14.9757	-1.7019	0.113644	0.307366	15.6916	15.591	11.2658	11.0204	13.7879	14.2807	15.2887	15.3168	15.6187	15.4576	14.0083	13.7755	15.1726	14.706	13.8954	13.8721	NaN	NaN	NaN	10.8276
334	pig46328		Ssc#S40559849|ENSSSCT00000011348	Ssc.15276	ENSSSCG00000010366	100154721	C10orf116	Adipose most abundant gene transcript 2 protein (apM-2) [Source:UniProtKB/Swiss-Prot;Acc:Q15847]|Similar to adipose specific 2	chrNA:-1--1	pig46328	-1.79524	-4.69564	-1.31746	0.280571	0.413697	15.0645	14.8431	11.2264	11.067	13.183	13.6673	15.2887	15.3168	15.2023	14.9291	14.1076	14.0437	14.706	14.0797	13.2985	13.3193	NaN	NaN	NaN	10.875
8475	pig25748;pig25749		ENSSSCT00000002714	Ssc.11038	ENSSSCG00000002444	100155248	LOC100155248	Similar to Fibulin 5	chrNA:-1--1	pig25748;pig25749	-0.18093	-4.78584	-1.42732	0.298237	0.381279	13.0063	12.8977	10.8832	NaN	11.6356	11.8017	11.3596	11.1865	13.4517	13.1152	11.3127	11.3139	13.1778	12.476	12.1831	11.9519	10.9392	10.9473	NaN	11.3514
14471	pig39748	LOC100155253	Ssc#S46877908	Ssc.3356		100155253	LOC100155253	Similar to zinc finger, AN1-type domain 3	chrNA:-1--1	pig39748	0.470632	-5.43674	-1.24856	0.229653	0.430351	13.5787	13.4945	11.6848	11.6214	12.1462	12.5188	12.5884	12.402	13.7064	13.5733	12.0437	12.0651	13.6673	13.401	12.4528	12.797	NaN	10.6447	10.6509	11.0792
8109	pig24643;pig24644		ENSSSCT00000002107	Ssc.18497	ENSSSCG00000001882	100155341	LOC100155341	Similar to Endonuclease VIII-like 1 (Nei-like 1) (DNA glycosylase/AP lyase Neil1) (DNA-(apurinic or apyrimidinic site) lyase Neil1) (NEH1) (FPG1)	chrNA:-1--1	pig24643;pig24644	-0.220106	-5.291	-0.617849	0.116774	0.650327	11.2751	11.2203	11.0201	10.7977	10.7814	11.1199	11.11	10.9415	11.4676	11.4564	10.7564	10.6386	11.3195	10.5846	10.7577	10.7953	NaN	NaN	NaN	10.7406
7170	pig21804;pig21805	LOC100155537;PBXIP1	ENSSSCT00000007158	Ssc.2814	ENSSSCG00000006536	100155537	LOC100155537	Similar to pre-B-cell leukemia transcription factor interacting protein 1	chrNA:-1--1	pig21804;pig21805	-0.323919	-6.92332	-1.9962	0.28833	0.258955	13.6051	13.4325	11.4549	11.362	11.6726	12.0673	11.9151	11.7697	13.8153	13.7095	11.2702	11.226	13.7573	13.2122	12.0355	12.0458	NaN	10.6626	10.7227	11.3478
11142	pig33329;pig33330	LOC100155605;PCBD1	ENSSSCT00000011247	Ssc.1705	ENSSSCG00000010275	100155605	LOC100155605	Similar to pterin-4 alpha-carbinolamine dehydratase/dimerization cofactor of hepatocyte nuclear factor 1 alpha	chrNA:-1--1	pig33329;pig33330	0.0999087	-3.89776	-1.24677	0.31987	0.426414	13.1231	12.8617	11.2408	11.0213	11.6887	11.3507	11.3933	11.3112	13.0449	12.3236	11.3613	11.365	12.2554	12.0545	12.2118	11.4282	11.7006	11.5145	NaN	11.3133
11498	pig34317;pig34318	LOC100155662;ZRANB1	ENSSSCT00000011750	Ssc.18050	ENSSSCG00000010738	100155662	LOC100155662	Similar to LOC523338 protein	chrNA:-1--1	pig34317;pig34318	0.137739	-3.99816	-0.981068	0.24538	0.509294	12.797	12.843	11.4484	11.3724	11.3171	11.7709	11.8605	11.7957	12.3793	12.3752	11.3423	11.3758	11.9951	11.6944	11.788	11.9643	10.5984	10.6187	NaN	11.0679
12512	pig37323;pig37324	LOC100155881	ENSSSCT00000005921	Ssc.54304	ENSSSCG00000005381	100155881	LOC100155881	Similar to alpha 1 type XV collagen	chrNA:-1--1	pig37323;pig37324	0.246422	-6.64203	-1.18981	0.179133	0.43354	13.924	13.5975	11.5409	11.4521	12.8658	13.0985	13.2751	13.0384	14.2271	13.8781	12.704	12.6196	13.5624	13.0745	12.7702	12.7737	11.0575	11.0401	NaN	11.0218
7491	pig22772;pig22773	LOC100155921;WRNIP1	ENSSSCT00000001102	Ssc.2136	ENSSSCG00000001010	100155921	LOC100155921	Similar to WRNIP1 protein	chrNA:-1--1	pig22772;pig22773	-0.287979	-3.84702	-1.25334	0.325795	0.432114	13.4889	13.4195	11.4289	11.4754	12.3831	12.6839	11.8483	11.8131	13.0186	12.9554	11.5749	11.5204	13.0757	12.5072	12.2979	12.476	NaN	NaN	10.6844	11.2557
19924	pig88396		Ssc#S46877084	Ssc.71629		100156034	LOC100156034	Similar to mKIAA4180 protein	chrNA:-1--1	pig88396	1.68443	-6.81501	-3.51081	0.51516	0.0802898	15.4715	15.3987	NaN	NaN	11.9466	12.0944	12.6852	12.5735	14.0541	13.935	11.5692	11.4649	14.5587	14.1076	10.6018	11.1802	11.5004	12.3555	15.1847	14.0113
7370	pig22348;pig22349	LOC100156038;WDR77	ENSSSCT00000007438	Ssc.2373	ENSSSCG00000006790	100156038	LOC100156038	Similar to methylosome protein 50	chrNA:-1--1	pig22348;pig22349	-0.30142	-4.29078	-0.540273	0.125915	0.686237	12.0106	11.8423	11.8479	11.5871	11.4084	11.6557	12.0075	11.8011	11.7506	11.7004	11.2332	11.2206	11.8114	11.2498	11.4092	11.28	10.72	10.8619	NaN	11.1737
8108	pig24641;pig24642	LOC100156538;MAN2C1	ENSSSCT00000002106	Ssc.3397	ENSSSCG00000001881	100156538	LOC100156538	Similar to MAN2C1 protein	chrNA:-1--1	pig24641;pig24642	-0.220241	-6.77293	-0.800396	0.118176	0.573589	12.147	12.0326	11.2274	10.938	11.2671	11.8106	11.6822	11.4691	12.3153	12.1801	11.325	11.4033	12.015	11.4376	11.4727	11.2723	10.5903	NaN	10.7643	11.3281
1637	pig03780;pig03781	CTSA;LOC100156798	ENSSSCT00000008134	Ssc.896	ENSSSCG00000007431	100156798	LOC100156798	Similar to cathepsin A	chrNA:-1--1	pig03780;pig03781	-1.1788	-3.75811	-1.65943	0.44156	0.35067	13.2331	13.3767	12.4602	12.3853	12.7928	12.7442	11.187	11.024	13.1517	13.2189	10.6422	NaN	13.0701	12.2483	12.2217	12.2473	NaN	NaN	10.7529	11.587
15017	pig43328		Ssc#S35172947	Ssc.9714		100156837	LOC100156837	Hypothetical protein LOC100156837	chrNA:-1--1	pig43328	0.538511	-5.34296	-0.968897	0.181341	0.505034	12.3812	12.0683	11.3296	11.1076	11.2912	11.7165	11.5781	11.3886	12.7116	12.3812	11.4368	11.4308	12.4316	11.6679	11.4832	11.3158	NaN	NaN	NaN	11.2799
11494	pig34309;pig34310	LOC100156865	ENSSSCT00000011746	Ssc.25198	ENSSSCG00000010734	100156865	LOC100156865	Similar to mitochondrial ornithine aminotransferase	chrNA:-1--1	pig34309;pig34310	0.137307	-6.3324	-1.03224	0.16301	0.488471	12.6896	12.9457	11.1847	11.2814	11.4601	11.9087	11.4023	11.3264	12.5248	12.6733	11.5498	11.5955	12.2511	11.9687	11.6552	11.9039	10.9727	11.1462	11.1047	11.2264
14829	pig41650		Ssc#S46877871	Ssc.6930		100157403	LOC100157403	Similar to furry homolog	chrNA:-1--1	pig41650	0.514975	-11.8431	-2.4433	0.206305	0.18307	14.2899	13.9085	10.773	10.6556	12.3734	12.7673	12.8622	12.483	14.503	14.3769	11.7307	11.6403	14.21	13.7064	11.8425	12.0917	NaN	10.7009	10.7691	11.4168
10803	pig32416;pig32417		ENSSSCT00000010780	Ssc.6066	ENSSSCG00000009836	100157748	LOC100157748	Similar to acyl-Coenzyme A dehydrogenase family, member 10	chrNA:-1--1	pig32416;pig32417	0.0646857	-4.12573	-0.666539	0.161557	0.631411	12.106	12.0698	11.7445	11.6361	10.7733	10.9944	12.394	12.2566	11.7849	12.007	11.4801	11.4317	11.6293	11.4731	11.0708	11.3189	NaN	NaN	NaN	10.8293
7279	pig22082;pig22083	LOC100157814;SF3B4	ENSSSCT00000007303	Ssc.3222	ENSSSCG00000006665	100157814	LOC100157814	Similar to Splicing factor 3b, subunit 4	chrNA:-1--1	pig22082;pig22083	-0.311591	-5.38782	-1.34691	0.249992	0.401712	13.9591	13.7638	11.989	11.7419	12.8607	12.9196	12.3622	12.0831	13.7821	13.587	12.046	12.152	13.6548	13.0384	12.7446	12.7617	11.3959	11.3127	NaN	11.3046
19504	pig81303	LOC100158066	Ssc#S46879131	Ssc.62509		100158066	LOC100158066	Similar to forkhead box C1	chrNA:-1--1	pig81303	1.43646	-5.67807	-1.02277	0.180127	0.495449	13.4636	13.4459	11.2971	11.2669	13.8583	13.9927	13.105	12.9213	13.5202	13.2154	12.301	12.1128	12.6499	12.377	12.485	12.6552	10.804	10.9147	10.7429	NaN
1722	pig04063;pig04064		ENSSSCT00000008270	Ssc.62635	ENSSSCG00000007538	100158102	LOC100158102	Similar to GATA binding protein 5	chrNA:-1--1	pig04063;pig04064	-1.15616	-3.93303	-0.279656	0.0711046	0.823806	11.0386	11.0458	11.0731	10.9153	11.0961	11.1946	11.1704	10.962	11.1003	11.0162	NaN	NaN	11.2917	NaN	10.761	10.7474	NaN	NaN	NaN	10.7727
14912	pig42318	LOC100169745	Ssc#S23212825	Ssc.7996		100169745	LOC100169745	Cellular retinoic acid binding protein 1	chrNA:-1--1	pig42318	0.52513	-3.84433	-1.98337	0.515922	0.258765	13.3782	13.0079	10.5795	10.7384	11.113	11.0443	11.8263	12.1564	14.24	14.2238	11.0683	11.1806	13.4442	14.24	12.4783	12.1892	11.4175	11.3592	11.4218	10.9416
1310	pig02667;pig02668		ENSSSCT00000019573	Ssc.55224|Ssc.57611	ENSSSCG00000017987	396903	LOC396903	Transcribed locus, strongly similar to NP_005955.1 myosin, heavy polypeptide 10, non-muscle [Homo sapiens]|Myosin	chrNA:-1--1	pig02667;pig02668	-1.27345	-5.4064	-1.43196	0.264864	0.376984	12.1749	12.6673	10.8869	10.7689	11.1484	11.117	11.4076	11.2797	12.4703	12.6217	10.6804	10.7716	12.0627	11.161	11.3431	11.4111	NaN	NaN	10.8012	11.2249
3477	pig10307;pig10308	LOC494560	ENSSSCT00000003203	Ssc.70595|Ssc.13823	ENSSSCG00000002899	494560	LOC494560	Transcribed locus, strongly similar to XP_001916014.1 PREDICTED: similar to heat shock protein, alpha-crystallin-related, B6 [Equus caballus]|Heat shock protein 20kDa	chrNA:-1--1	pig10307;pig10308	-0.806046	-3.85182	-0.817238	0.212169	0.574029	12.3039	12.0797	11.5186	11.2075	11.5163	11.7232	11.5159	11.3418	12.1576	11.9151	11.0435	11.2274	12.283	11.5005	11.7175	11.1989	11.0043	10.9152	NaN	11.4545
3183	pig09395;pig09396		ENSSSCT00000009977	Ssc.2819	ENSSSCG00000009110	733663	LOC733663	Calsarcin 1	chrNA:-1--1	pig09395;pig09396	-0.854562	-5.1709	-1.69316	0.327441	0.314291	14.3171	14.4976	NaN	NaN	10.5994	10.7074	12.8321	12.9311	13.7246	13.9868	NaN	NaN	12.7326	12.7899	12.5716	13.0141	11.8407	12.415	13.9085	14.6207
14419	pig39512	LOC733663	Ssc#S33346438	Ssc.2819		733663	LOC733663	Calsarcin 1	chrNA:-1--1	pig39512	0.464176	-4.01795	-2.10803	0.524653	0.26811	13.9978	13.924	10.9651	10.7983	11.1705	11.2904	14.0332	13.6291	14.0866	13.6417	10.9544	11.0301	13.1	12.6047	12.6662	12.5674	14.3584	14.9053	15.6812	15.8087
15936	pig48920	LOC780417	Ssc#S35164146	Ssc.20992		780417	LOC780417	UB2E2	chrNA:-1--1	pig48920	0.660803	-4.0167	-0.492309	0.122566	0.713023	11.4804	11.3762	10.9357	10.7983	10.8501	11.2483	10.928	10.7622	11.508	11.495	10.8181	10.8883	11.1648	10.9629	11.0661	11.1179	10.732	10.6601	10.9076	10.9277
8131	pig24700;pig24701	LOC100154899;LOXL1	ENSSSCT00000002143		ENSSSCG00000001914	100154899	LOXL1	Lysyl oxidase homolog 1 Precursor (EC 1.4.3.-)(Lysyl oxidase-like protein 1)(LOL) [Source:UniProtKB/Swiss-Prot;Acc:Q08397]	chrNA:-1--1	pig24700;pig24701	-0.21773	-4.31694	-1.4005	0.324421	0.388048	13.3612	13.1325	11.0447	NaN	11.4589	11.6502	11.6866	11.6029	13.7196	13.0131	11.6191	11.596	13.386	12.8101	12.5844	11.8249	11.2531	11.1663	10.696	11.1165
4106	pig12238;pig12239	LPHN2	ENSSSCT00000004163		ENSSSCG00000003761		LPHN2	Latrophilin-2 Precursor (Calcium-independent alpha-latrotoxin receptor 2)(Latrophilin homolog 1)(Lectomedin-1) [Source:UniProtKB/Swiss-Prot;Acc:O95490]	chrNA:-1--1	pig12238;pig12239	-0.709334	-4.58637	-1.63896	0.357356	0.315035	13.4695	13.2551	11.6062	11.2744	12.0205	12.3043	11.5647	11.4066	12.795	12.3318	10.9966	11.155	12.4773	12.21	11.8381	11.3058	11.0994	11.1412	11.1007	11.7338
6253	pig18932;pig18933	LYPD6	ENSSSCT00000017075	Ssc.38623	ENSSSCG00000015676		LYPD6	Transcribed locus, strongly similar to NP_919298.1 LY6/PLAUR domain containing 6 precursor [Homo sapiens]	chrNA:-1--1	pig18932;pig18933	-0.429355	-6.54993	-1.46709	0.223985	0.361101	12.6974	12.3926	11.2156	10.9382	11.311	11.4124	11.719	11.6436	12.6036	12.1013	NaN	10.7312	12.2194	11.7722	10.8625	NaN	10.8273	10.8082	10.6415	11.6256
18353	pig72260	M6P/IGF2R	Ssc#S46881286	Ssc.50316		100158103	IGF2R	Similar to mannose-6-phosphate/insulin-like growth factor II receptor	chrNA:-1--1	pig72260	1.08241	-6.7572	-0.813417	0.120378	0.567959	12.5359	12.5526	11.9985	11.7342	11.8683	12.1742	11.779	11.6154	12.8059	12.5656	11.7675	11.7444	12.6489	12.5106	11.7762	11.9182	11.3255	11.9023	11.3517	11.3987
3656	pig10872;pig10873	MAMSTR	ENSSSCT00000003486	Ssc.58581	ENSSSCG00000003143		MAMSTR	Transcribed locus, moderately similar to NP_001124387.1 MEF2 activating motif and SAP domain containing transcriptional regulator isoform 1 [Homo sapiens]	chrNA:-1--1	pig10872;pig10873	-0.776868	-3.77649	-0.661948	0.175281	0.632397	11.542	11.3593	10.8105	NaN	10.9528	11.2402	10.8924	NaN	11.5427	11.1608	NaN	NaN	11.3021	10.6132	11.0102	10.5888	10.6777	10.7185	10.7886	11.4394
14533	pig40045;pig40046	MANBAL	Ssc#S35170453	Ssc.4014			MANBAL	Transcribed locus, strongly similar to NP_071360.1 mannosidase, beta A, lysosomal-like [Homo sapiens]	chrNA:-1--1	pig40045;pig40046	0.478309	-4.49675	-0.881273	0.19598	0.542461	12.473	12.454	11.3556	11.3463	11.5512	11.9494	11.3992	11.2932	12.0711	12.1004	11.244	11.195	12.01	11.7797	11.6273	11.507	10.6497	10.6412	NaN	10.9041
4022	pig11972;pig11973	MAP7D1	ENSSSCT00000004033	Ssc.1951	ENSSSCG00000003637		MAP7D1	Transcribed locus, strongly similar to NP_060537.3 MAP7 domain containing 1 [Homo sapiens]	chrNA:-1--1	pig11972;pig11973	-0.721757	-5.24722	-1.60445	0.305772	0.327665	12.8377	13.2421	11.3638	11.5069	11.2522	NaN	11.9398	12.5597	13.3823	13.77	11.3376	11.5785	12.5092	13.7196	12.1726	11.7255	11.3861	10.9061	13.6109	13.1393
4088	pig12190;pig12191		ENSSSCT00000004139		ENSSSCG00000003738		MAPRE2	Microtubule-associated protein RP/EB family member 2 (APC-binding protein EB2)(End-binding protein 2)(EB2) [Source:UniProtKB/Swiss-Prot;Acc:Q15555]	chrNA:-1--1	pig12190;pig12191	-0.711971	-3.82181	-0.364818	0.0954567	0.776116	11.2003	11.2043	10.911	10.7648	11.1047	11.0436	10.8394	10.6918	11.3309	11.3539	NaN	NaN	11.1627	10.6814	10.8199	10.9458	NaN	NaN	NaN	10.9432
2946	pig08402;pig08403	MFSD7	ENSSSCT00000009491	Ssc.1525	ENSSSCG00000008674		MFSD7	Transcribed locus, moderately similar to XP_001488207.1 PREDICTED: similar to major facilitator superfamily domain containing 7 [Equus caballus]	chrNA:-1--1	pig08402;pig08403	-0.896135	-3.74458	-0.679691	0.181513	0.625352	12.6036	12.4093	11.9091	11.6827	12.2061	12.0159	11.8668	11.7317	12.3016	12.1798	11.4958	11.5448	12.3455	11.5655	11.9131	11.8217	11.1123	11.0331	10.996	11.602
13594	pig12204		ENSSSCT00000004146|ENSSSCT00000004145		ENSSSCG00000003744		MOCOS	Molybdenum cofactor sulfurase (MoCo sulfurase)(EC 4.4.-.-)(HMCS)(MOS) [Source:UniProtKB/Swiss-Prot;Acc:Q96EN8]	chrNA:-1--1	pig12204	0.36717	-3.7299	-0.511554	0.13715	0.701417	11.6455	11.6344	11.1908	10.9739	11.935	11.8203	11.2665	10.9712	11.5358	11.3624	10.8722	10.9863	11.6278	11.0656	11.1483	11.1251	NaN	NaN	NaN	10.8336
19187	pig78386;pig78387	MYH10	Ssc#S34516266	Ssc.58646			MYH10	Transcribed locus, strongly similar to NP_005955.1 myosin, heavy polypeptide 10, non-muscle [Homo sapiens]	chrNA:-1--1	pig78386;pig78387	1.31267	-4.78676	-1.69275	0.353632	0.300527	14.0409	14.21	10.6972	10.8291	12.6695	12.739	13.1188	13.0441	15.0445	14.9974	12.6788	12.5239	13.9927	13.9591	13.1468	13.1722	11.2864	11.5204	11.0506	10.5801
12916	pig03549	MYL9	ENSSSCT00000008008|ENSSSCT00000008005	Ssc.54244	ENSSSCG00000007318|ENSSSCG00000007316	100157760	MYL9	Myosin regulatory light polypeptide 9	chrNA:-1--1	pig03549	0.290996	-5.97822	-3.01847	0.504911	0.140384	15.7947	15.9152	12.6203	12.8876	12.1519	10.6928	15.2887	15.3168	15.341	15.6952	11.8185	12.0432	15.1791	15.794	13.6817	13.1288	15.4062	15.1549	14.3315	13.935
14550	pig40100	MYLPF;Mylpf	Ssc#S23756098	Ssc.4128			MYLPF	Transcribed locus, strongly similar to NP_058034.1 myosin light chain, phosphorylatable, fast skeletal muscle [Mus musculus]	chrNA:-1--1	pig40100	0.480386	-4.88776	-1.2543	0.256621	0.412331	11.9481	11.8493	10.7973	NaN	11.0784	10.8348	11.174	11.0256	12.6241	11.9172	10.7089	10.8159	11.7202	11.7251	11.1421	10.6547	12.8885	12.3667	11.0582	11.9402
5157	pig15559;pig15560	NDUFB11	ENSSSCT00000013422	Ssc.23542|Ssc.56415	ENSSSCG00000012274		NDUFB11	Transcribed locus, strongly similar to XP_001491508.1 PREDICTED: similar to mitochondrial NADH:ubiquinone oxidoreductase ESSS subunit [Equus caballus]	chrNA:-1--1	pig15559;pig15560	-0.564882	-3.85392	-0.511353	0.132684	0.702689	12.432	12.2843	12.306	12.2568	11.6912	11.9337	12.3197	12.2358	12.1993	12.2244	11.6611	11.6656	12.2872	11.7816	11.8116	11.9562	10.8751	10.7929	10.5948	12.3527
4108	pig12252;pig12253		ENSSSCT00000004170		ENSSSCG00000003768		NEXN	Nexilin (F-actin binding protein)(Nelin) [Source:UniProtKB/Swiss-Prot;Acc:Q0ZGT2]	chrNA:-1--1	pig12252;pig12253	-0.709052	-4.09574	-1.31755	0.321687	0.4108	13.3629	13.4636	NaN	NaN	10.7501	NaN	12.1543	12.6478	12.7868	13.2751	11.3684	11.7563	12.078	13.2394	12.4735	12.0199	11.2566	11.1526	11.2278	13.6125
2008	pig05136;pig05137	NNT	ENSSSCT00000018381		ENSSSCG00000016877		NNT	NAD(P) transhydrogenase, mitochondrial Precursor (EC 1.6.1.2)(Nicotinamide nucleotide transhydrogenase)(Pyridine nucleotide transhydrogenase) [Source:UniProtKB/Swiss-Prot;Acc:Q13423]	chrNA:-1--1	pig05136;pig05137	-1.08662	-4.63526	-1.02074	0.220211	0.498255	12.9903	12.7385	12.3105	12.0741	12.2228	12.2155	12.0882	11.8992	12.734	12.5669	11.392	11.5885	12.6947	11.7365	12.0658	11.9005	11.4507	11.0415	10.6947	12.3676
15121	pig44096;pig44097	NOL7	Ssc#S35169785	Ssc.11045			NOL7	Transcribed locus, strongly similar to NP_057251.2 nucleolar protein 7, 27kDa [Homo sapiens]	chrNA:-1--1	pig44096;pig44097	0.551691	-4.40525	-1.24018	0.281523	0.436975	13.9786	13.8748	12.1396	12.1988	12.6335	12.9924	13.0153	12.8885	13.6371	13.6895	12.2432	12.1478	13.6117	13.3458	12.7232	13.105	11.0063	11.2136	11.4646	12.2647
14282	pig38942	NONO;Nono	Ssc#S35168225	Ssc.1771			NONO	Transcribed locus, strongly similar to NP_001012356.1 non-POU domain containing, octamer-binding [Rattus norvegicus]	chrNA:-1--1	pig38942	0.447821	-3.7588	-0.56799	0.151109	0.674352	14.1539	13.7958	12.9783	12.9112	13.1393	13.6557	13.3629	13.0186	13.9739	13.8954	13.3917	13.4292	12.981	12.6324	13.186	13.5401	10.8112	11.2668	10.8803	11.8851
12516	pig37331;pig37332	NOR-1	ENSSSCT00000005925	Ssc.761	ENSSSCG00000005385	397479	NOR-1	Neuron-derived orphan receptor-1 alfa	chrNA:-1--1	pig37331;pig37332	0.246799	-10.9478	-2.76331	0.252407	0.150255	15.1499	14.8524	11.8099	11.5706	11.8204	11.9705	13.9591	13.603	15.0112	14.7605	11.8134	11.897	12.3175	11.8699	12.5003	12.5099	11.1763	11.372	13.7466	13.5278
3054	pig08894;pig08895		ENSSSCT00000009731	Ssc.16348	ENSSSCG00000008888	397547	NPY1R	Neuropeptide Y receptor Y1	chrNA:-1--1	pig08894;pig08895	-0.876857	-4.71877	-0.866838	0.1837	0.552304	11.8625	12.0947	10.7657	10.7497	10.6395	10.6557	11.1098	11.0918	11.9022	12.1468	NaN	NaN	12.55	12.0791	10.949	11.4829	NaN	NaN	NaN	NaN
10344	pig31095;pig31096		ENSSSCT00000012839		ENSSSCG00000011729		NULL	NULL	chrNA:-1--1	pig31095;pig31096	0.0159403	-11.1318	-3.32222	0.298446	0.104373	15.4355	15.3256	11.1941	10.9877	11.7875	12.2261	13.838	13.4429	15.3372	15.228	11.5974	11.559	14.6309	14.0541	12.4001	12.4809	10.9112	10.8762	11.0873	11.888
11767	pig35116;pig35117		ENSSSCT00000004774		ENSSSCG00000004318		NULL	NULL	chrNA:-1--1	pig35116;pig35117	0.166426	-8.45917	-1.25167	0.147966	0.422721	12.1418	12.1165	10.844	10.7938	10.8215	10.9882	12.1397	11.9306	12.0104	12.0556	10.8152	10.7347	11.6776	11.4578	10.6593	11.1085	NaN	10.5927	10.9761	12.0806
4999	pig15036;pig15037		ENSSSCT00000009417		ENSSSCG00000008606		NULL	NULL	chrNA:-1--1	pig15036;pig15037	-0.58548	-6.78908	-1.19468	0.175971	0.437736	12.1094	12.2182	10.7056	10.6391	10.7202	10.6112	10.6691	10.7315	12.0292	12.4246	NaN	NaN	11.5352	11.9468	10.929	11.2954	NaN	NaN	NaN	NaN
4806	pig14397;pig14398		ENSSSCT00000009104		ENSSSCG00000008313		NULL	NULL	chrNA:-1--1	pig14397;pig14398	-0.610835	-6.45919	-1.55673	0.24101	0.334426	12.3043	12.0596	11.0012	NaN	11.7719	12.0769	11.5211	11.373	12.8833	12.5111	10.8097	10.8094	12.855	12.1898	11.148	10.7643	NaN	NaN	10.6323	11.3441
5558	pig16827;pig16828		ENSSSCT00000015980		ENSSSCG00000014629		NULL	NULL	chrNA:-1--1	pig16827;pig16828	-0.513997	-6.1248	-1.61878	0.264299	0.325814	13.312	13.2612	11.1982	10.8564	11.2655	11.6421	11.7597	11.5995	13.069	12.6179	11.2622	11.3642	12.7173	12.0481	11.8958	11.2627	10.8033	10.7504	10.6325	11.2832
10525	pig31615;pig31616		ENSSSCT00000013100		ENSSSCG00000011972		NULL	NULL	chrNA:-1--1	pig31615;pig31616	0.0352394	-6.05233	-1.81566	0.299994	0.287504	14.1497	13.7936	11.017	10.9206	11.486	11.6222	13.2211	12.9577	13.4916	13.5028	11.5696	11.6061	12.4981	12.2299	12.0893	12.41	NaN	NaN	NaN	10.6868
224	pig37039		ENSSSCT00000005769|Ssc#S29987673	Ssc.71874	ENSSSCG00000005235		NULL	Transcribed locus, strongly similar to XP_614789.3 PREDICTED: similar to KIAA0172 [Bos taurus]|NULL	chrNA:-1--1	pig37039	-1.93505	-5.95357	-0.765196	0.128527	0.590629	11.503	11.5338	10.7552	10.6153	10.8936	11.1094	10.887	10.8309	11.6307	11.5717	10.5866	NaN	11.1936	10.803	10.9163	10.9163	NaN	NaN	10.7155	10.8067
1486	pig03258		ENSSSCT00000007852		ENSSSCG00000007178		NULL	NULL	chrNA:-1--1	pig03258	-1.22036	-5.1807	-1.12732	0.2176	0.464772	12.3129	12.0683	11.2578	10.9464	11.3665	11.429	11.286	11.0423	12.2209	11.9992	10.7916	10.9008	12.2522	11.1389	11.4866	10.913	NaN	NaN	10.885	11.3163
13142	pig23808		ENSSSCT00000001668|ENSSSCT00000001666		ENSSSCG00000001496|ENSSSCG00000001494		NULL	NULL	chrNA:-1--1	pig23808	0.316395	-5.1662	-0.886432	0.171583	0.539792	12.1037	12.3345	10.9064	10.6981	11.0877	10.9675	11.5121	11.4205	11.8643	12.0329	11.0815	11.0807	11.5387	11.3463	11.2055	11.4219	NaN	NaN	10.9116	11.3311
4710	pig14115;pig14116		ENSSSCT00000008960		ENSSSCG00000008181		NULL	NULL	chrNA:-1--1	pig14115;pig14116	-0.623863	-4.9929	-1.06229	0.21276	0.482934	12.5481	12.4027	11.6269	11.404	12.3766	12.5003	11.7553	11.6037	12.7276	12.2995	11.2501	11.2512	12.5205	11.8383	11.8387	11.3886	NaN	NaN	10.6707	11.0769
775	pig00888;pig00889		ENSSSCT00000018667		ENSSSCG00000017147		NULL	NULL	chrNA:-1--1	pig00888;pig00889	-1.48463	-4.47098	-0.746395	0.166942	0.5997	11.7218	11.6159	11.0431	10.6876	11.3142	11.4494	11.081	10.7561	11.5091	11.4674	NaN	NaN	11.5663	10.6247	11.0899	10.9288	10.7663	10.5874	NaN	11.3849
1094	pig01925;pig01926		ENSSSCT00000019195		ENSSSCG00000017633		NULL	NULL	chrNA:-1--1	pig01925;pig01926	-1.34783	-4.45431	-0.869073	0.195108	0.54669	11.9562	11.5997	11.2131	10.9969	11.2952	11.2244	11.3098	11.0792	11.6569	11.4214	NaN	10.7124	11.6487	10.6653	11.0887	10.7008	10.8073	10.7002	11.1992	11.7136
1949	pig04878;pig04879		ENSSSCT00000012223		ENSSSCG00000011161		NULL	NULL	chrNA:-1--1	pig04878;pig04879	-1.10012	-4.40863	-0.52781	0.119722	0.696138	11.2936	11.2506	11.0254	10.8773	11.4896	11.2653	11.0955	10.8299	11.3212	11.3221	NaN	NaN	11.5513	10.6164	10.9594	10.804	NaN	NaN	10.7678	11.0233
4175	pig12472;pig12473		ENSSSCT00000004277		ENSSSCG00000003865		NULL	NULL	chrNA:-1--1	pig12472;pig12473	-0.699318	-4.34285	-0.39516	0.0909909	0.760013	11.3617	11.3997	11.6227	11.5012	11.3812	11.426	11.4493	11.414	11.2359	11.2788	NaN	NaN	11.5387	10.6542	10.986	10.865	NaN	NaN	NaN	10.7487
1493	pig03277;pig03278	LOC100153440	ENSSSCT00000007862		ENSSSCG00000007186	100153440	NULL	NULL	chrNA:-1--1	pig03277;pig03278	-1.21831	-4.25793	-0.76266	0.179115	0.584649	11.8466	11.7466	10.8596	NaN	10.9737	11.3518	10.9848	NaN	11.6303	11.2867	NaN	NaN	11.4351	NaN	10.968	NaN	10.7739	10.8358	11.0785	11.8308
1800	pig04357		ENSSSCT00000011945		ENSSSCG00000010914		NULL	NULL	chrNA:-1--1	pig04357	-1.13571	-4.25554	-0.871327	0.204751	0.54402	12.0071	11.7706	10.9217	NaN	11.2032	11.617	10.9379	10.6569	11.613	11.404	NaN	NaN	11.4514	10.8114	11.1064	10.796	NaN	NaN	NaN	11.2395
7833	pig23806;pig23807		ENSSSCT00000001668		ENSSSCG00000001496		NULL	NULL	chrNA:-1--1	pig23806;pig23807	-0.250023	-4.15825	-0.844924	0.203192	0.554485	12.3109	12.41	10.8002	10.7483	10.9308	10.9786	11.7691	11.6367	11.8713	12.0267	11.1705	11.1911	11.4487	11.2652	11.2866	11.591	NaN	NaN	NaN	11.3952
12265	pig36630;pig36631		ENSSSCT00000005558		ENSSSCG00000005042		NULL	NULL	chrNA:-1--1	pig36630;pig36631	0.219583	-4.09365	-1.22267	0.298674	0.423611	12.526	12.8178	11.1968	11.4146	10.9835	11.0666	11.9223	12.263	13.0416	13.4742	11.5137	11.4699	12.4839	13.0899	12.1328	11.8526	11.0467	10.9323	10.9468	11.2355
3924	pig11677;pig11678		ENSSSCT00000003890		ENSSSCG00000003501		NULL	NULL	chrNA:-1--1	pig11677;pig11678	-0.736744	-4.07023	-0.659648	0.162066	0.628485	11.3718	11.6327	10.8978	10.7233	10.9522	11.2304	10.7411	10.6196	11.2713	11.1171	NaN	NaN	11.129	NaN	10.7921	10.7143	NaN	NaN	10.5787	10.9487
12923	pig03817		ENSSSCT00000008154|ENSSSCT00000008151		ENSSSCG00000007447|ENSSSCG00000007450		NULL	NULL	chrNA:-1--1	pig03817	0.291814	-4.02049	-0.989787	0.246186	0.506242	12.2194	11.959	11.4859	11.2438	11.2863	11.6377	11.573	11.3971	11.8507	11.5896	10.6463	10.7639	11.8966	11.0183	11.3452	10.9041	10.8165	10.7764	10.7249	11.5808
2100	pig05437;pig05438		ENSSSCT00000018539		ENSSSCG00000017027		NULL	NULL	chrNA:-1--1	pig05437;pig05438	-1.06546	-3.97249	-1.08178	0.272319	0.466441	12.4179	12.2483	11.4544	11.2004	11.468	11.585	11.414	11.1887	11.9024	11.5693	NaN	10.8542	11.904	11.0225	11.3306	10.8295	10.9182	10.8373	10.7352	11.5295
10355	pig31125;pig31126		ENSSSCT00000012854		ENSSSCG00000011743		NULL	NULL	chrNA:-1--1	pig31125;pig31126	0.017161	-3.94262	-0.808816	0.205147	0.572039	12.2143	11.877	10.7501	NaN	11.5751	12.2052	11.326	11.1673	12.3416	11.9728	11.1178	11.0874	12.4436	11.6457	11.5933	11.372	10.7739	10.8186	10.7302	11.2665
1095	pig01927;pig01928		ENSSSCT00000019196		ENSSSCG00000017634		NULL	NULL	chrNA:-1--1	pig01927;pig01928	-1.34741	-3.87644	-1.08402	0.279643	0.469464	12.3586	12.0574	11.6684	11.3934	11.5837	11.749	11.6006	11.5082	11.9127	11.5016	NaN	10.6104	11.7631	10.9743	11.3135	10.7818	10.6846	10.7075	10.7954	11.5051
2173	pig05682;pig05683		ENSSSCT00000010184		ENSSSCG00000009296		NULL	NULL	chrNA:-1--1	pig05682;pig05683	-1.04928	-3.76204	-0.489894	0.13022	0.714821	11.2885	11.324	10.9541	10.7038	11.2969	11.3626	10.9788	10.7749	11.3907	11.2384	NaN	NaN	11.4378	NaN	11.0464	10.81	10.5771	NaN	10.7501	10.9646
13162	pig24583	IDH2;LOC100157889	ENSSSCT00000002078|ENSSSCT00000002075		ENSSSCG00000001854|ENSSSCG00000001852	100157889|397603	IDHP	Isocitrate dehydrogenase [NADP], mitochondrial Precursor; Fragment (IDH)(EC 1.1.1.42)(Oxalosuccinate decarboxylase)(NADP(+)-specific ICDH)(IDP)(ICD-M) [Source:UniProtKB/Swiss-Prot;Acc:P33198]|NULL	chrNA:-1--1	pig24583	0.318663	-4.83345	-1.63545	0.338361	0.341837	14.2271	14.1224	12.7758	12.8894	12.8192	12.5234	12.7801	12.6408	14.2007	14.3584	12.0998	12.1582	13.7958	13.5645	12.7861	13.3227	12.2419	13.0401	15.2452	15.6612
369	pig51818;pig51819	LOC100152915	ENSSSCT00000000721|Ssc#S46879159	Ssc.25072	ENSSSCG00000000665	100152915	LOC100152915	NULL|Hypothetical protein LOC100152915	chrNA:-1--1	pig51818;pig51819	-1.75942	-3.99916	-0.412533	0.103155	0.752843	11.4712	11.4036	10.8076	10.6503	10.6429	11.1419	10.9897	10.7955	11.4335	11.3973	11.0011	10.9263	11.0949	10.8249	10.9545	11.1734	NaN	10.6713	10.686	10.759
13585	pig11686;pig11687	OST48	ENSSSCT00000003895|ENSSSCT00000003894	Ssc.5550	ENSSSCG00000003505	397385	OST48	Dolichyl-diphosphooligosaccharide--protein glycosyltransferase 48 kDa subunit Precursor (Oligosaccharyl transferase 48 kDa subunit)(DDOST 48 kDa subunit)(EC 2.4.1.119) [Source:UniProtKB/Swiss-Prot;Acc:Q29381]|Oligosaccharyltransferase OST48	chrNA:-1--1	pig11686;pig11687	0.36607	-4.35168	-1.15502	0.265419	0.459247	12.8205	12.7322	11.6233	11.3507	11.9748	12.2639	11.4262	11.2802	12.6196	12.3766	11.1342	11.1969	12.4217	11.8597	11.9829	11.6149	11.1724	11.0557	NaN	11.8275
154	pig24947	PABPN1;Pabpn1	Ssc#S35166154|ENSSSCT00000002263	Ssc.72354	ENSSSCG00000002023		PABPN1	Transcribed locus, strongly similar to NP_062275.1 poly(A) binding protein, nuclear 1 [Mus musculus]|Polyadenylate-binding protein 2 (Poly(A)-binding protein 2)(Poly(A)-binding protein II)(PABII)(Polyadenylate-binding nuclear protein 1)(Nuclear poly(A)-binding protein 1) [Source:UniProtKB/Swiss-Prot;Acc:Q86U42]	chrNA:-1--1	pig24947	-2.06146	-4.78087	-1.25626	0.262768	0.424063	13.2922	12.9371	11.5001	11.1865	12.2461	12.3747	11.8983	11.6226	13.3744	12.8866	11.6057	11.5666	13.0079	12.3997	12.3345	11.9585	10.685	10.839	NaN	11.0678
8922	pig27008;pig27009	PACSIN3;Pacsin3	ENSSSCT00000014464	Ssc.21952	ENSSSCG00000013244		PACSIN3	Transcribed locus, strongly similar to NP_001009966.1 protein kinase C and casein kinase substrate in neurons 3 [Rattus norvegicus]	chrNA:-1--1	pig27008;pig27009	-0.133309	-7.20812	-1.20694	0.167441	0.433623	13.1152	13.0009	10.9381	10.9766	11.3195	11.7278	12.2865	11.9784	12.9152	12.7238	11.56	11.5973	12.6423	12.1813	11.9226	11.8475	10.9743	11.2235	11.9162	13.3968
1639	pig03784;pig03785	LOC100153535;PCIF1	ENSSSCT00000008136		ENSSSCG00000007433	100153535	PCIF1	Phosphorylated CTD-interacting factor 1 [Source:UniProtKB/Swiss-Prot;Acc:Q9H4Z3]	chrNA:-1--1	pig03784;pig03785	-1.17827	-3.92194	-0.551945	0.140733	0.683536	11.894	11.8471	11.897	11.6711	11.6445	11.8636	11.973	11.744	11.6828	11.6774	11.0765	11.2924	12.4009	11.4153	11.4083	11.1164	11.0978	10.899	NaN	11.3395
4704	pig14097;pig14098	PDCL3	ENSSSCT00000008950		ENSSSCG00000008172		PDCL3	Phosducin-like protein 3 (PhPL3)(Viral IAP-associated factor 1)(VIAF-1)(HTPHLP) [Source:UniProtKB/Swiss-Prot;Acc:Q9H2J4]	chrNA:-1--1	pig14097;pig14098	-0.624641	-4.16262	-0.700294	0.168234	0.622095	11.7508	11.7277	11.242	11.0991	11.5518	11.5659	11.3965	11.2756	11.8075	11.7367	10.8913	10.8559	11.7904	11.1625	11.3869	11.0873	10.6868	10.7464	10.8937	11.5622
4266	pig12766;pig12767	PDGFA	ENSSSCT00000008273		ENSSSCG00000007541		PDGFA	Platelet-derived growth factor subunit A Precursor (PDGF subunit A)(Platelet-derived growth factor A chain)(Platelet-derived growth factor alpha polypeptide)(PDGF-1) [Source:UniProtKB/Swiss-Prot;Acc:P04085]	chrNA:-1--1	pig12766;pig12767	-0.686136	-3.93629	-0.714189	0.181437	0.611153	12.5106	12.4059	11.6	11.2742	12.2281	12.3793	11.9066	11.7197	12.5819	12.1778	11.5616	11.6392	12.6552	12.1297	12.0126	11.6061	11.1454	11.0646	11.311	12.0191
6310	pig19178;pig19179	LIM;PDLIM3	ENSSSCT00000017199		ENSSSCG00000015796	414421	PDLI3	PDZ and LIM domain protein 3 (Actinin-associated LIM protein)(Alpha-actinin-2-associated LIM protein) [Source:UniProtKB/Swiss-Prot;Acc:Q6QGC0]	chrNA:-1--1	pig19178;pig19179	-0.422769	-10.5503	-2.511	0.238002	0.176276	13.6548	13.4442	11.109	10.8123	12.1546	12.3284	11.8224	11.6938	14.0461	13.6743	10.9768	11.0378	13.8617	13.1964	11.6222	11.1386	10.9316	10.9883	11.0511	11.3852
4117	pig12293;pig12294		ENSSSCT00000004192		ENSSSCG00000003788		PE2R3	Prostaglandin E2 receptor EP3 subtype (PGE receptor, EP3 subtype)(Prostanoid EP3 receptor) [Source:UniProtKB/Swiss-Prot;Acc:P50131]	chrNA:-1--1	pig12293;pig12294	-0.707834	-4.87407	-1.87154	0.383978	0.256083	12.4357	12.9139	NaN	NaN	NaN	NaN	11.5538	11.8524	13.4565	13.915	11.0678	11.2063	12.3163	13.1181	11.543	11.4179	NaN	NaN	11.3507	12.5587
14606	pig40414	PFKM	Ssc#S30930816	Ssc.4741		733601	PFKM	Phosphofructokinase, muscle	chrNA:-1--1	pig40414	0.487112	-4.95074	-1.60389	0.32397	0.345196	13.6371	13.6219	10.8283	11.2031	11.4717	11.5065	11.6046	11.9177	13.698	13.9891	11.7178	11.7537	13.4078	14.1848	12.856	12.203	14.653	13.6291	15.591	15.3497
1013	pig01653;pig01654		ENSSSCT00000019055		ENSSSCG00000017502		PGAP3	Post-GPI attachment to proteins factor 3 Precursor (PER1-like domain-containing protein 1)(Gene coamplified with ERBB2 protein)(hCOS16) [Source:UniProtKB/Swiss-Prot;Acc:Q96FM1]	chrNA:-1--1	pig01653;pig01654	-1.37939	-4.4353	-0.668023	0.150615	0.631045	11.5051	11.4866	11.1782	11.0278	11.2493	11.3876	11.2542	11.0558	11.5564	11.2748	NaN	10.6641	11.5602	10.685	11.0316	10.7772	10.6548	NaN	10.5816	11.1982
12409	pig37052;pig37053	PGM5;Pgm5	ENSSSCT00000005777	Ssc.43830	ENSSSCG00000005243		PGM5	Transcribed locus, strongly similar to NP_778178.3 phosphoglucomutase 5 [Mus musculus]	chrNA:-1--1	pig37052;pig37053	0.235102	-14.0241	-2.93952	0.209604	0.128581	15.0504	14.8638	11.156	11.4598	12.4809	12.7287	12.824	12.5952	15.5384	15.3637	12.1822	12.1351	15.1499	14.6334	12.3434	12.3975	11.2696	11.5724	11.3194	12.0273
14220	pig38625	PHEROA	Ssc#S35165548	Ssc.1137			PHEROA	Transcribed locus, strongly similar to NP_001005462.1 pheromaxein A [Sus scrofa]	chrNA:-1--1	pig38625	0.440497	-4.48441	-1.14337	0.254966	0.440738	11.9057	12.6879	11.4517	11.643	11.0336	11.1586	11.1971	10.9396	11.8021	12.0812	10.9867	11.0617	12.8894	12.758	10.7782	11.0768	NaN	10.6608	10.6547	11.0384
3928	pig11689;pig11690		ENSSSCT00000003896		ENSSSCG00000003506		PINK1	Serine/threonine-protein kinase PINK1, mitochondrial Precursor (EC 2.7.11.1)(PTEN-induced putative kinase protein 1)(BRPK) [Source:UniProtKB/Swiss-Prot;Acc:Q9BXM7]	chrNA:-1--1	pig11689;pig11690	-0.736089	-4.02383	-0.67554	0.167885	0.625963	11.8069	11.6746	10.9268	NaN	11.1348	11.1176	11.2835	11.106	11.9389	11.5273	10.9614	11.0403	11.6162	10.8218	11.3079	10.936	NaN	NaN	NaN	11.2447
15287	pig45254		Ssc#S18280739	Ssc.13002		397610	PPP1R14A	Protein phosphatase 1, regulatory (inhibitor) subunit 14A	chrNA:-1--1	pig45254	0.573332	-6.56823	-2.14681	0.326848	0.218331	12.8753	12.7937	10.7412	NaN	10.891	10.9118	12.8216	12.1585	13.8748	13.1935	11.1833	11.137	12.9311	12.2447	11.2025	10.6273	10.5781	10.7911	NaN	11.0459
11606	pig34620;pig34621	PPP1R14C	ENSSSCT00000004526		ENSSSCG00000004094		PPP1R14C	Protein phosphatase 1 regulatory subunit 14C (PKC-potentiated PP1 inhibitory protein)(Kinase-enhanced PP1 inhibitor)(Serologically defined breast cancer antigen NY-BR-81) [Source:UniProtKB/Swiss-Prot;Acc:Q8TAE6]	chrNA:-1--1	pig34620;pig34621	0.149562	-5.67805	-0.78585	0.138401	0.579942	11.6958	11.4908	10.9742	10.699	10.894	11.3043	11.1977	10.949	11.7668	11.5221	NaN	NaN	11.2852	10.7221	11.0208	10.8185	10.5959	10.6958	10.8089	11.8401
9325	pig28102;pig28103	PRDX2;Prdx2	ENSSSCT00000015010	Ssc.16653	ENSSSCG00000013736		PRDX2	Transcribed locus, strongly similar to NP_058865.1 peroxiredoxin 2 [Rattus norvegicus]	chrNA:-1--1	pig28102;pig28103	-0.0907548	-3.7641	-0.650224	0.172744	0.630207	13.6764	13.4038	12.8494	12.6353	12.4009	12.8504	12.9022	12.653	13.3433	13.0639	12.7682	12.6637	13.1305	12.4262	12.7238	12.7308	11.123	11.1766	11.7725	13.6473
5562	pig16835;pig16836	PRKCDBP	ENSSSCT00000015984	Ssc.17847	ENSSSCG00000014633		PRKCDBP	Transcribed locus, strongly similar to NP_659477.2 protein kinase C, delta binding protein [Homo sapiens]	chrNA:-1--1	pig16835;pig16836	-0.513538	-5.66409	-0.975219	0.172176	0.514219	15.9297	15.9152	12.5587	12.2133	13.8923	13.924	15.2887	15.3168	15.82	15.8443	14.6636	14.7788	15.8443	15.5001	15.2367	14.9291	12.4839	12.2535	10.7009	12.4621
8827	pig26748;pig26749		ENSSSCT00000014327	Ssc.54913	ENSSSCG00000013107	100144769	PRPF19	PRP19/PSO4 pre-mRNA processing factor 19 homolog (S. cerevisiae)	chrNA:-1--1	pig26748;pig26749	-0.14364	-4.22331	-0.558584	0.132262	0.678899	11.2917	11.479	10.63	10.6203	10.8855	11.1285	10.7546	NaN	11.211	11.2262	NaN	10.5801	11.1326	NaN	10.8327	10.8436	NaN	NaN	NaN	11.0272
3753	pig11146;pig11147	PRPF31;Prpf31	ENSSSCT00000003624	Ssc.20228	ENSSSCG00000003263		PRPF31	Transcribed locus, strongly similar to NP_081604.3 PRP31 pre-mRNA processing factor 31 isoform 1 [Mus musculus]	chrNA:-1--1	pig11146;pig11147	-0.762062	-4.35889	-0.781601	0.179312	0.582904	12.3495	12.1925	13.3726	12.489	12.2466	12.6087	12.8377	12.6418	12.499	12.1128	11.5364	11.6709	12.7353	12.0335	11.6114	11.2088	NaN	NaN	NaN	10.9651
14123	pig37946		ENSSSCT00000006246|ENSSSCT00000006245	Ssc.17912	ENSSSCG00000005680	100154304	PRRX2	Paired mesoderm homeobox protein 2 (Paired-related homeobox protein 2)(PRX-2) [Source:UniProtKB/Swiss-Prot;Acc:Q99811]|Similar to Paired mesoderm homeobox protein 2 (PRX-2) (Paired-related homeobox protein 2)	chrNA:-1--1	pig37946	0.42896	-4.25707	-1.10688	0.260009	0.477658	14.3247	14.0461	11.3214	11.3388	12.3598	12.5279	12.0616	11.9572	14.2164	14.2961	12.8408	12.7358	13.6291	13.3209	13.2439	13.6354	NaN	10.6985	NaN	10.6653
926	pig01390;pig01391	PSME3	ENSSSCT00000018924	Ssc.17340	ENSSSCG00000017385	397625	PSME3	Proteasome (prosome, macropain) activator subunit 3 (PA28 gamma; Ki)	chrNA:-1--1	pig01390;pig01391	-1.41449	-4.1253	-0.583118	0.141352	0.668191	11.8184	11.6876	11.3918	11.1628	11.2833	11.5177	11.4877	11.2684	11.5837	11.537	10.9301	11.2094	11.5868	10.5842	11.1893	10.9656	10.7794	NaN	NaN	11.2638
14224	pig38651;pig38652	PTMA;Ptma	Ssc#S18263129	Ssc.1181			PTMA	Transcribed locus, strongly similar to NP_032998.1 prothymosin alpha [Mus musculus]	chrNA:-1--1	pig38651;pig38652	0.440965	-4.0466	-0.521256	0.128813	0.697443	15.3372	15.4159	14.6207	14.6692	14.7307	14.9291	15.2887	15.3168	15.5437	15.5569	14.9384	15.0254	15.4768	15.1726	14.7605	15.0445	13.6743	14.0638	13.5343	13.7981
13456	pig04338;pig04339	PTPRC	ENSSSCT00000011935|ENSSSCT00000011934|ENSSSCT00000011936	Ssc.58231	ENSSSCG00000010907	396634	PTPRC	Protein tyrosine phosphatase, receptor type, C|CD45 antigen isoform 3 Fragment (EC 3.1.3.48) [Source:UniProtKB/TrEMBL;Acc:Q6SZ83]	chrNA:-1--1	pig04338;pig04339	0.351369	-3.68142	-0.506763	0.137655	0.704537	11.6274	11.5445	11.8243	11.5574	11.4151	11.4049	11.7867	11.5752	11.4048	11.3727	10.8333	10.954	11.7193	10.8049	11.1726	10.9624	10.6562	NaN	10.5958	11.0137
10441	pig31370;pig31371		ENSSSCT00000012981		ENSSSCG00000011867		Q009B5	MYLK Fragment [Source:UniProtKB/TrEMBL;Acc:Q009B5]	chrNA:-1--1	pig31370;pig31371	0.0262062	-11.2684	-2.35818	0.209274	0.198123	14.0437	13.9739	11.1557	11.0998	11.2653	11.6137	12.3551	11.9678	14.1539	13.924	11.3677	11.4257	13.7015	13.0695	11.9035	11.9659	11.0837	10.8211	11.2815	11.6245
13412	pig02671		ENSSSCT00000019574|ENSSSCT00000019573	Ssc.55224|Ssc.57611	ENSSSCG00000017987	396903	LOC396903	Transcribed locus, strongly similar to NP_005955.1 myosin, heavy polypeptide 10, non-muscle [Homo sapiens]|Myosin Fragment [Source:UniProtKB/TrEMBL;Acc:Q29061]|Myosin	chrNA:-1--1	pig02671	0.346566	-4.527	-1.05499	0.233044	0.477977	11.6872	12.0468	10.9432	10.9036	11.4637	11.1032	11.2223	11.1954	12.2326	12.3884	NaN	NaN	11.5209	10.8224	11.2159	11.2382	NaN	NaN	10.8043	11.1656
2747	pig07688;pig07689		ENSSSCT00000000716		ENSSSCG00000000660		Q6R6N0	Alpha-2-macroglobulin Fragment [Source:UniProtKB/TrEMBL;Acc:Q6R6N0]	chrNA:-1--1	pig07688;pig07689	-0.932733	-13.1334	-3.29044	0.25054	0.104092	14.6363	14.784	11.3778	11.414	10.9924	NaN	12.3271	13.0429	14.3634	14.7359	10.9308	11.2694	12.5351	13.7778	11.8166	11.3411	10.8922	10.6245	10.9306	11.0164
10193	pig30664;pig30665		ENSSSCT00000012628		ENSSSCG00000011538		Q6WL01	LIM and cysteine-rich domains 1 Fragment [Source:UniProtKB/TrEMBL;Acc:Q6WL01]	chrNA:-1--1	pig30664;pig30665	0.000376	-6.29298	-2.49901	0.397111	0.190945	14.8757	14.6309	10.9128	10.707	12.7592	13.1181	12.3392	12.1817	15.0504	14.8548	11.7696	11.7573	14.7149	13.9927	12.9123	12.9765	10.8057	10.7203	10.9883	11.46
1790	pig04324;pig04325		ENSSSCT00000011930		ENSSSCG00000010903		Q865X9	LIM-homeobox protein 9 Fragment [Source:UniProtKB/TrEMBL;Acc:Q865X9]	chrNA:-1--1	pig04324;pig04325	-1.1383	-3.68559	-0.46372	0.12582	0.727652	11.3099	11.2816	11.8691	11.6896	11.5033	11.6293	12.101	11.9437	11.1792	11.2552	10.5967	10.7619	11.7298	10.8955	10.8656	10.9468	NaN	NaN	NaN	10.8651
2743	pig07670		ENSSSCT00000000708		ENSSSCG00000000653		Q8SPX1	Type II membrane protein CD69 [Source:UniProtKB/TrEMBL;Acc:Q8SPX1]	chrNA:-1--1	pig07670	-0.933425	-5.1641	-0.598694	0.115934	0.662287	11.2653	11.3677	11.1011	10.9329	11.4117	11.294	10.9654	10.6539	11.3375	11.3061	NaN	NaN	11.3024	10.6751	10.8814	10.7785	NaN	NaN	NaN	10.7757
6810	pig20737;pig20738	LOC100157655	ENSSSCT00000006593		ENSSSCG00000006009	100157655	Q95KP6	ER-resident type II transmembrane glycosyltransferase Fragment [Source:UniProtKB/TrEMBL;Acc:Q95KP6]	chrNA:-1--1	pig20737;pig20738	-0.364182	-4.53037	-1.10391	0.243669	0.470155	12.3303	12.0177	10.9811	10.6731	11.5852	11.9376	11.2047	10.9963	12.5316	12.1288	10.8987	10.9103	12.2715	11.6349	11.5925	11.1911	10.7914	10.9147	10.7784	11.3024
13755	pig22057;pig22058		ENSSSCT00000007288|ENSSSCT00000007289	Ssc.13766	ENSSSCG00000006652	397648	MCL1	Myeloid cell leukemia sequence 1 (BCL2-related)|Myeloid cell leukemia protein 1 [Source:UniProtKB/TrEMBL;Acc:Q95KR3]	chrNA:-1--1	pig22057;pig22058	0.385716	-4.76449	-1.46027	0.306491	0.372275	13.1295	13.051	11.4445	11.4674	12.3136	12.3508	11.2043	11.1249	12.5776	12.7142	11.0137	11.038	12.0673	11.7229	11.6773	11.9022	NaN	NaN	10.6184	10.7866
1162	pig02179;pig02180		ENSSSCT00000019324		ENSSSCG00000017754		Q9XSM9	Urate transporter/channel protein, isoform (UATp,i) [Source:UniProtKB/TrEMBL;Acc:Q9XSM9]	chrNA:-1--1	pig02179;pig02180	-1.32293	-3.7779	-0.619076	0.163868	0.655877	11.5351	11.4846	11.317	11.0902	11.2779	11.5743	11.3026	11.0792	11.5433	11.3429	NaN	10.7039	11.4783	NaN	11.1614	10.8706	NaN	NaN	NaN	11.0673
4983	pig14954;pig14955		ENSSSCT00000009379		ENSSSCG00000008573		RAB10	Ras-related protein Rab-10 [Source:UniProtKB/Swiss-Prot;Acc:P61026]	chrNA:-1--1	pig14954;pig14955	-0.587606	-4.29151	-0.650097	0.151484	0.636446	11.5768	11.4182	11.3165	10.9746	11.0624	11.1735	11.13	11.0226	11.5361	11.2155	NaN	10.6128	11.5259	10.7197	10.949	10.7937	NaN	10.6059	NaN	10.8127
7365	pig22339;pig22340	LOC100153199;RAP1A	ENSSSCT00000007433	Ssc.11026	ENSSSCG00000006785	100153199	RAP1A	RAP1A, member of RAS oncogene family	chrNA:-1--1	pig22339;pig22340	-0.301953	-4.56991	-1.39062	0.304299	0.38757	14.0733	13.9286	12.164	12.0533	12.4044	12.5865	12.6741	12.3766	13.5484	13.4517	11.951	12.0382	13.3029	12.8011	12.6974	12.753	10.9961	11.1467	11.3401	12.3019
13688	pig18388;pig18389		ENSSSCT00000016804|ENSSSCT00000016805		ENSSSCG00000015426		RELN	Reelin Precursor (EC 3.4.21.-) [Source:UniProtKB/Swiss-Prot;Acc:P78509]	chrNA:-1--1	pig18388;pig18389	0.378006	-4.24221	-0.366437	0.0863787	0.776098	11.176	11.1133	10.8529	10.6559	11.0201	11.1974	10.9385	10.6165	11.1178	11.0682	NaN	NaN	11.2439	10.7563	10.7692	10.8406	NaN	10.5845	10.6142	10.8513
3839	pig11409;pig11410	RERE	ENSSSCT00000003758		ENSSSCG00000003387		RERE	Arginine-glutamic acid dipeptide repeats protein (Atrophin-1-related protein)(Atrophin-1-like protein) [Source:UniProtKB/Swiss-Prot;Acc:Q9P2R6]	chrNA:-1--1	pig11409;pig11410	-0.749347	-5.04357	-1.22669	0.243219	0.426781	12.3135	12.1757	11.2015	10.899	11.6935	11.804	11.675	11.5347	12.8388	12.4819	10.984	11.0955	12.6047	12.0905	11.6112	11.2124	10.7945	10.7911	11.028	11.4669
7015	pig21387;pig21388	RGS5	ENSSSCT00000006942	Ssc.8330	ENSSSCG00000006334	397640	RGS5	Regulator of G-protein signaling 5	chrNA:-1--1	pig21387;pig21388	-0.341211	-11.9448	-2.8388	0.237661	0.13655	14.1717	13.9403	11.4903	11.7184	10.9858	10.825	12.4236	12.6552	14.5354	14.7788	11.4191	11.5226	14.4603	15.0148	11.6432	11.4861	11.1585	11.1443	11.1166	11.9354
16418	pig52500	RHOB	Ssc#S35170885	Ssc.26417		100144503	RHOB	Ras homolog gene family, member B	chrNA:-1--1	pig52500	0.731018	-4.64784	-2.18308	0.469698	0.232507	14.5112	14.3046	11.8906	12.0347	13.2211	13.1787	12.2537	12.6056	15.0254	15.2832	12.0024	11.9577	14.391	14.6987	13.3193	13.1127	11.6696	11.3558	12.1564	12.5305
5030	pig15119;pig15120		ENSSSCT00000009459		ENSSSCG00000008646		RNF144A	Probable E3 ubiquitin-protein ligase RNF144A (EC 6.3.2.-)(RING finger protein 144A)(Ubiquitin-conjugating enzyme 7-interacting protein 4)(UbcM4-interacting protein 4) [Source:UniProtKB/Swiss-Prot;Acc:P50876]	chrNA:-1--1	pig15119;pig15120	-0.581377	-3.78346	-0.466051	0.123181	0.724303	11.352	11.3346	10.9197	10.6515	11.1436	11.1385	11.0326	10.8555	11.4623	11.2089	NaN	NaN	11.2786	10.608	10.9684	10.9778	10.5833	NaN	NaN	11.0384
9511	pig28650;pig28651	RNF187	ENSSSCT00000015288	Ssc.23205	ENSSSCG00000013996		RNF187	Transcribed locus, strongly similar to NP_001157736.1 ring finger protein 187 [Rattus norvegicus]	chrNA:-1--1	pig28650;pig28651	-0.0715227	-6.04363	-1.38622	0.229368	0.384302	13.9403	13.7419	11.7718	11.5301	12.4078	12.855	12.4503	12.1317	13.6291	13.3767	12.0585	12.0229	13.7638	13.0295	12.5316	12.5301	NaN	10.5833	10.6169	11.8171
1567	pig03541;pig03542	SCAND1	ENSSSCT00000008001	Ssc.19804	ENSSSCG00000007312		SCAND1	Transcribed locus, moderately similar to NP_361012.1 SCAN domain containing protein 1 [Homo sapiens]	chrNA:-1--1	pig03541;pig03542	-1.19737	-4.46577	-0.861307	0.192869	0.555133	11.97	12.0161	11.5169	11.1806	11.2604	11.6927	11.5137	11.308	11.956	11.6889	10.8375	10.9853	11.6393	10.779	11.4179	10.9452	10.7096	10.6608	10.7876	11.466
14692	pig40855;pig40856	SEPX1	Ssc#S36038433	Ssc.5520		100037965	SEPX1	Selenoprotein X, 1	chrNA:-1--1	pig40855;pig40856	0.498009	-3.71648	-0.571413	0.153751	0.676185	12.204	12.323	12.1722	12.0957	11.2067	11.6293	12.1306	11.9066	12.4465	12.3717	11.9793	11.8728	12.3977	12.1334	11.5877	11.6196	10.7743	10.995	10.8812	11.8582
15027	pig43382	PLANH1;SERPINE1	Ssc#S20116789	Ssc.9781		396945	SERPINE1	Serpin peptidase inhibitor, clade E (nexin, plasminogen activator inhibitor type 1), member 1	chrNA:-1--1	pig43382	0.539643	-4.20295	-1.36174	0.323997	0.378477	13.568	13.6743	11.9996	12.118	10.894	NaN	12.596	13.3139	14.2807	14.5655	12.7691	12.7395	12.7495	13.8555	12.8885	12.2445	11.4863	11.544	11.9416	12.5875
4012	pig11945;pig11946	SESN2	ENSSSCT00000004020		ENSSSCG00000003624		SESN2	Sestrin-2 (Hi95) [Source:UniProtKB/Swiss-Prot;Acc:P58004]	chrNA:-1--1	pig11945;pig11946	-0.723248	-3.74009	-0.40054	0.107094	0.757679	11.2335	11.2031	11.1956	10.9092	11.3923	11.1004	11.2193	11.0018	11.2383	11.0574	10.653	10.7928	11.3006	10.7386	10.8495	10.8348	10.6468	10.5956	10.9557	11.4732
14457	pig39698;pig39699	SFRP2;Sfrp2	Ssc#S17525371	Ssc.3232			SFRP2	Transcribed locus, strongly similar to NP_033170.1 secreted frizzled-related protein 2 precursor [Mus musculus]	chrNA:-1--1	pig39698;pig39699	0.468863	-6.97788	-1.2495	0.179066	0.42277	12.5188	12.6247	10.7886	10.8346	10.9148	10.6069	NaN	NaN	12.6096	12.8607	11.2321	11.1953	11.5117	11.7404	11.5418	11.6466	NaN	10.6338	10.7019	NaN
15206	pig44606;pig44607		Ssc#S23213371	Ssc.11945		100240724	SGCD	Sarcoglycan, delta (35kDa dystrophin-associated glycoprotein)	chrNA:-1--1	pig44606;pig44607	0.562835	-3.99202	-1.08231	0.271118	0.484288	12.9411	12.7543	NaN	NaN	11.3208	11.4846	11.5399	11.5506	12.926	13.203	11.5608	11.5295	12.2362	12.2457	12.0063	12.3984	NaN	10.6471	10.7659	10.7893
18752	pig75851;pig75852	SH3BGR;Sh3bgr	Ssc#S35168888	Ssc.54921			SH3BGR	Transcribed locus, strongly similar to NP_056640.1 SH3-binding domain glutamic acid-rich protein [Mus musculus]	chrNA:-1--1	pig75851;pig75852	1.18149	-7.5677	-1.60669	0.212309	0.327682	13.2938	13.2453	11.229	11.4926	10.8255	11.1019	12.7768	12.9833	13.652	13.7333	11.7731	11.6055	12.9825	13.1317	12.0709	12.0481	11.8362	12.4814	14.4523	13.9371
15882	pig48657;pig48658	SIAHBP1	Ssc#S18274850	Ssc.19992		414402	SIAHBP1	Fuse-binding protein-interacting repressor SIAHBP1	chrNA:-1--1	pig48657;pig48658	0.653069	-3.79021	-0.679827	0.179364	0.632163	12.5686	12.4709	11.6177	11.563	11.6698	12.1857	11.6998	11.6578	12.4798	12.5425	11.7226	11.595	12.5248	12.208	11.8177	12.2071	10.7255	10.9375	NaN	11.1903
1652	pig03815;pig03816		ENSSSCT00000008153		ENSSSCG00000007449		SLC13A3	Solute carrier family 13 member 3 (Sodium-dependent high-affinity dicarboxylate transporter 2)(Na(+)/dicarboxylate cotransporter 3)(NaDC-3)(hNaDC3) [Source:UniProtKB/Swiss-Prot;Acc:Q8WWT9]	chrNA:-1--1	pig03815;pig03816	-1.17472	-4.10321	-0.486295	0.118516	0.714144	11.3054	11.251	11.1117	10.7457	10.9706	11.3075	11.2323	10.8989	11.3148	11.1016	NaN	10.6449	11.3195	NaN	10.8262	NaN	NaN	NaN	NaN	10.9019
11022	pig33000;pig33001	SLC25A1;Slc25a1	ENSSSCT00000011077	Ssc.17264|Ssc.73091	ENSSSCG00000010116		SLC25A1	Transcribed locus, strongly similar to NP_059003.1 solute carrier family 25, member 1 precursor [Rattus norvegicus]	chrNA:-1--1	pig33000;pig33001	0.087518	-4.04228	-0.643674	0.159235	0.638556	12.2016	12.0098	11.4692	11.2467	11.1688	11.4375	11.4718	11.3388	11.9549	11.7618	11.2263	11.2323	11.8168	11.228	11.5184	11.3764	10.8785	10.7907	NaN	11.3235
2089	pig05411;pig05412	SLIT3;Slit3	ENSSSCT00000018524	Ssc.70637|Ssc.5753	ENSSSCG00000017012		SLIT3	Transcribed locus, strongly similar to NP_035542.2 slit homolog 3 precursor [Mus musculus]	chrNA:-1--1	pig05411;pig05412	-1.06792	-3.87958	-0.681693	0.175713	0.624578	12.3708	12.1589	11.2536	11.0575	11.7226	11.5918	11.6826	11.5017	12.0929	11.962	11.2554	11.4529	12.3904	11.4951	11.7308	11.4187	10.6275	10.5854	10.9651	11.3711
10944	pig32800;pig32801	SMTN	ENSSSCT00000010974	Ssc.55343	ENSSSCG00000010017	414369	SMTN	Smoothelin	chrNA:-1--1	pig32800;pig32801	0.0793368	-11.909	-3.66834	0.308032	0.0824135	15.4768	15.5001	11.4581	11.5747	11.3323	10.729	12.6387	13.356	15.591	15.6871	11.3814	11.5624	14.8995	15.5414	12.5023	12.1355	12.3457	11.6347	11.3426	12.3357
19831	pig87860	SNRPB;snrpb	Ssc#S26392224	Ssc.70657			SNRPB	Transcribed locus, strongly similar to NP_991230.1 small nuclear ribonucleoprotein polypeptides B and B1 [Danio rerio]	chrNA:-1--1	pig87860	1.61596	-4.53913	-2.0853	0.459405	0.213082	14.9748	14.9562	11.7048	11.8522	12.7633	13.0314	12.3801	12.1478	13.6914	13.4923	12.097	11.974	13.935	13.5575	12.203	12.4996	11.8096	12.6032	14.3206	12.7673
2171	pig05676;pig05677		ENSSSCT00000010181		ENSSSCG00000009293		SPATA13	Spermatogenesis-associated protein 13 [Source:UniProtKB/Swiss-Prot;Acc:Q96N96]	chrNA:-1--1	pig05676;pig05677	-1.04966	-3.87097	-0.497457	0.128509	0.709567	11.2302	11.1823	11.0939	10.9458	11.428	11.4293	11.1392	10.944	11.3946	11.2119	NaN	NaN	11.5487	10.6882	10.9217	10.8149	NaN	NaN	10.7543	11.211
6312	pig19182	LOC100153277	ENSSSCT00000017201		ENSSSCG00000015797	100153277	SRBS2	Sorbin and SH3 domain-containing protein 2 [Contains Sorbin] [Source:UniProtKB/Swiss-Prot;Acc:P28220]	chrNA:-1--1	pig19182	-0.42256	-6.63334	-1.61114	0.242885	0.326817	13.1214	13.0824	11.4616	11.1608	11.5527	11.6629	11.6924	11.5829	12.7822	12.4973	11.1708	11.2325	12.0203	11.5707	11.6326	11.0028	11.0184	11.0457	NaN	11.7763
19770	pig87571;pig87572	STK17A	Ssc#S19545741	Ssc.70199			STK17A	Transcribed locus, moderately similar to NP_004751.2 serine/threonine kinase 17a [Homo sapiens]	chrNA:-1--1	pig87571;pig87572	1.5765	-4.87757	-1.49869	0.307262	0.340099	12.9479	12.8377	11.9541	11.9659	11.0752	11.1228	11.2571	11.3087	12.0289	12.0368	11.0857	11.0023	11.7766	11.5643	10.7275	11.041	10.966	10.9641	11.0533	10.8525
14833	pig41675;pig41676	SYTL2;Sytl2	Ssc#S23775495	Ssc.6974			SYTL2	Transcribed locus, strongly similar to NP_001035177.1 synaptotagmin-like 2 isoform 5 [Mus musculus]	chrNA:-1--1	pig41675;pig41676	0.515412	-4.29746	-0.802126	0.186651	0.569309	11.5895	11.4439	10.6693	NaN	10.6621	10.9809	11.089	10.8164	11.9833	11.8572	10.8172	10.7757	11.2967	10.6781	11.0435	11.0289	10.6084	10.6096	10.6407	10.7641
5850	pig17714;pig17715	TAGLN	ENSSSCT00000016439		ENSSSCG00000015073		TAGLN	Transgelin (Smooth muscle protein 22-alpha)(SM22-alpha)(WS3-10)(22 kDa actin-binding protein) [Source:UniProtKB/Swiss-Prot;Acc:Q01995]	chrNA:-1--1	pig17714;pig17715	-0.47782	-4.09274	-2.8716	0.701632	0.178178	15.1985	15.2678	10.8924	11.0288	11.8773	11.7469	13.0472	13.7095	15.5235	15.6993	11.4083	11.4575	15.1369	15.794	13.7395	13.5975	11.3347	11.1941	11.516	11.5062
19018	pig77334	TBL1X;Tbl1x	Ssc#S39798033	Ssc.56922			TBL1X	Transcribed locus, strongly similar to NP_065626.1 transducin (beta)-like 1 X-linked [Mus musculus]	chrNA:-1--1	pig77334	1.25743	-4.92147	-1.48033	0.300789	0.347971	13.698	13.5278	12.2765	12.5289	12.4969	12.7489	13.18	13.0038	14.4427	14.3678	12.3797	12.3564	13.9085	13.6997	12.5572	12.8216	12.5667	13.349	11.309	12.2944
649	pig00536;pig00537	TES	ENSSSCT00000018114	Ssc.46797	ENSSSCG00000016636	100125376	TES	Testis derived transcript	chrNA:-1--1	pig00536;pig00537	-1.55243	-6.22975	-1.44642	0.23218	0.370705	12.2309	12.3534	11.2912	11.5026	11.3648	11.0456	11.7188	11.6763	12.4589	12.7205	10.7184	10.9322	12.3824	12.3801	10.8885	11.439	10.7975	NaN	11.159	11.1585
5160	pig15569;pig15570		ENSSSCT00000013426		ENSSSCG00000012277		TIMP1	Metalloproteinase inhibitor 1 Precursor (TIMP-1) [Source:UniProtKB/Swiss-Prot;Acc:P35624]	chrNA:-1--1	pig15569;pig15570	-0.564494	-5.76188	-0.762752	0.132379	0.588739	12.485	12.3197	12.4148	12.3421	12.2627	12.1969	11.6298	11.465	12.644	12.5359	11.7884	11.8542	12.2578	11.7573	11.6048	11.6863	NaN	NaN	NaN	10.9095
12457	pig37199;pig37200	TLN1;Tln1	ENSSSCT00000005856	Ssc.73059|Ssc.58381|Ssc.16858|Ssc.65569	ENSSSCG00000005317		TLN1	Transcribed locus, strongly similar to NP_035732.2 talin 1 [Mus musculus]|Transcribed locus, strongly similar to NP_989854.1 talin 1 [Gallus gallus]	chrNA:-1--1	pig37199;pig37200	0.240402	-3.85849	-1.53719	0.398391	0.332322	14.2052	14.1924	12.6436	12.8801	12.748	12.5915	13.5624	13.8004	15.0906	15.331	12.8123	12.8627	14.5931	14.8638	13.4429	13.5526	11.0129	11.1047	11.6583	12.3757
10	pig02420;pig02421	TMEM93;Tmem93	Ssc#S18550902|ENSSSCT00000019443	Ssc.1559	ENSSSCG00000017867		TMEM93	Transcribed locus, strongly similar to NP_001099276.1 transmembrane protein 93 [Rattus norvegicus]	chrNA:-1--1	pig02420;pig02421	-3.08969	-3.75769	-1.2791	0.340394	0.427087	13.1517	13.3744	11.9011	11.8087	12.4634	12.2589	11.9392	11.9199	12.8441	12.8087	11.2929	11.3282	12.9641	12.0276	12.229	12.2124	11.1254	10.7982	10.7982	11.5425
19065	pig77595;pig77596	TMOD1;Tmod1	Ssc#S23758705	Ssc.57334			TMOD1	Transcribed locus, strongly similar to NP_037176.2 tropomodulin 1 [Rattus norvegicus]	chrNA:-1--1	pig77595;pig77596	1.27228	-10.5073	-1.4967	0.142443	0.356061	12.7801	12.9354	11.5574	11.6512	11.0851	11.1996	11.4124	11.3963	12.7646	12.8536	11.2904	11.1892	12.0525	12.029	11.2721	11.5953	11.1875	11.7376	11.0168	10.9807
14293	pig38993;pig38994	FN14;Fn14;TNFRSF12A;TWEAKR	Ssc#S23213185	Ssc.1864		100217390	TNFRSF12A	Tumor necrosis factor receptor superfamily, member 12A	chrNA:-1--1	pig38993;pig38994	0.449117	-6.37917	-1.49126	0.23377	0.349604	12.564	12.4739	11.0264	10.8205	11.1493	11.3339	11.8253	11.5401	13.2331	12.706	11.2886	11.3298	11.9447	11.7414	11.3797	11.0139	10.8095	10.9367	10.7333	11.2522
10117	pig30447;pig30448	TNNC1	ENSSSCT00000012521	Ssc.3085	ENSSSCG00000011441	100156435	TNNC1	Troponin C	chrNA:-1--1	pig30447;pig30448	-0.00740437	-4.22822	-1.84577	0.436536	0.298501	13.8216	13.6587	11.4897	11.2075	12.123	12.1274	14.391	14.1717	14.3941	13.7269	11.4437	11.5198	14.6239	13.7246	12.9302	12.3246	12.1964	12.3674	13.7246	15.04
19240	pig78880	TPM1;Tpm1	Ssc#S35173906	Ssc.59326			TPM1	Transcribed locus, strongly similar to NP_001029245.1 tropomyosin 1, alpha isoform g [Rattus norvegicus]	chrNA:-1--1	pig78880	1.33104	-6.03406	-1.57674	0.261307	0.336587	14.771	15.1677	11.6437	11.8947	12.5952	12.6541	15.2887	15.3168	15.3497	15.4159	13.2869	13.365	15.4715	15.3832	13.9286	13.8169	13.7212	14.0449	12.0494	11.5086
12455	pig37195;pig37196	TPM2	ENSSSCT00000005854	Ssc.20571	ENSSSCG00000005316	396693	TPM2	Tropomyosin 2 (beta)	chrNA:-1--1	pig37195;pig37196	0.24018	-8.57592	-2.5716	0.299863	0.162369	14.727	14.6134	11.6415	11.959	11.3182	10.9808	15.2887	15.3168	15.4449	15.5414	12.3614	12.3608	14.838	15.1123	12.638	12.68	11.0931	11.2064	11.7786	11.3017
4184	pig12490;pig12491		ENSSSCT00000004287		ENSSSCG00000003875		TTC39A	Tetratricopeptide repeat protein 39A (TPR repeat protein 39A)(Differentially expressed in MCF7 with estradiol protein 6)(DEME-6) [Source:UniProtKB/Swiss-Prot;Acc:Q5SRH9]	chrNA:-1--1	pig12490;pig12491	-0.698014	-3.6957	-0.586498	0.158697	0.663151	11.484	11.4217	11.0399	10.8671	11.3743	11.4268	11.0371	10.7769	11.5	11.0827	NaN	NaN	11.3349	10.6411	10.9437	10.7962	NaN	NaN	10.6789	11.1636
18579	pig75132	UBB;Ubb	Ssc#S35322206	Ssc.53872			UBB	Transcribed locus, strongly similar to NP_035794.1 ubiquitin B [Mus musculus]	chrNA:-1--1	pig75132	1.13571	-3.97727	-0.75424	0.189638	0.587823	12.0294	12.3402	11.0925	11.3567	11.379	11.457	11.3687	11.4272	12.4693	12.6387	11.6185	11.498	12.0212	12.2432	11.7966	11.5476	11.3145	11.4916	11.1588	10.8991
13653	pig15551;pig15552	UBA1;UBE1X;Uba1	ENSSSCT00000013418|ENSSSCT00000013417	Ssc.33809|Ssc.1875|Ssc.70443|Ssc.57575	ENSSSCG00000012270	397312	UBE1X	Transcribed locus, strongly similar to NP_001014102.1 ubiquitin-activating enzyme E1 [Rattus norvegicus]|Ubiquitin-activating enzyme E1	chrNA:-1--1	pig15551;pig15552	0.373916	-4.41794	-0.824902	0.186716	0.572092	13.2658	13.356	12.5229	12.4252	12.9306	12.693	12.3712	12.2979	13.2189	13.2907	12.2065	12.2461	13.3227	12.9084	12.6036	12.7758	10.9493	10.7676	NaN	11.6623
11000	pig32943;pig32944		ENSSSCT00000011049	Ssc.62206|Ssc.4590|Ssc.60571	ENSSSCG00000010088	100154268	UBE2L3	Ubiquitin-conjugating enzyme E2L 3|Transcribed locus, strongly similar to XP_344047.2 PREDICTED: similar to Ubiquitin-conjugating enzyme E2 L3 (Ubiquitin-protein ligase L3) (Ubiquitin carrier protein L3) (UbcM4) [Rattus norvegicus]|Transcribed locus, strongly similar to NP_001002072.1 ubiquitin-conjugating enzyme E2L 3 [Danio rerio]	chrNA:-1--1	pig32943;pig32944	0.0852167	-4.87474	-0.875701	0.179641	0.547556	12.2959	12.4313	11.4647	11.5877	11.044	11.298	11.639	11.5693	12.0721	12.3656	11.2913	11.2621	11.8555	11.8868	11.3727	11.736	NaN	NaN	10.6099	11.1688
12924	pig04088	UCHL5	ENSSSCT00000011818|ENSSSCT00000011821	Ssc.8201	ENSSSCG00000010802|ENSSSCG00000010805	100144472	UCHL5	NULL|Ubiquitin carboxyl-terminal hydrolase L5	chrNA:-1--1	pig04088	0.291925	-3.84676	-1.29816	0.337469	0.413956	13.2531	12.9765	11.723	11.3474	12.4938	12.6408	11.7698	11.5844	12.6649	12.454	11.1705	11.1422	12.6852	12.1381	12.1084	11.7347	10.7867	10.732	10.9253	11.6493
9630	pig28964;pig28965	VCAN	ENSSSCT00000015440	Ssc.16024	ENSSSCG00000014136		VCAN	Transcribed locus, moderately similar to NP_851378.1 versican precursor [Bos taurus]	chrNA:-1--1	pig28964;pig28965	-0.0588845	-5.30912	-1.20452	0.226877	0.433756	12.8457	12.4436	11.415	11.0924	12.9036	12.9634	11.5042	11.4279	12.8647	12.3757	11.4089	11.4547	12.5017	12.0768	11.7352	11.1128	11.6849	11.5364	NaN	11.5967
1869	pig04607;pig04608	VIM;Vim	ENSSSCT00000012075	Ssc.42613|Ssc.51500	ENSSSCG00000011033		VIM	Transcribed locus, strongly similar to NP_035831.2 vimentin [Mus musculus]|Vimentin	chrNA:-1--1	pig04607;pig04608	-1.11922	-3.9312	-2.31856	0.589785	0.244674	15.8476	15.8065	13.5467	13.3045	14.6436	14.6001	14.3289	14.314	15.82	15.8443	12.6847	12.4587	15.8443	15.2774	14.4169	14.4838	13.3114	12.5046	10.6541	11.23
1870	pig04611		ENSSSCT00000012076		ENSSSCG00000011033		VIME	Vimentin Fragments [Source:UniProtKB/Swiss-Prot;Acc:P02543]	chrNA:-1--1	pig04611	-1.11902	-5.20049	-1.23391	0.237269	0.422142	13.7015	13.7535	13.4761	13.0416	12.5623	12.6592	14.0019	14.0437	13.2006	13.195	12.5146	12.3035	13.6743	12.9597	12.1123	11.9845	11.3374	11.1705	NaN	11.198
14032	pig33418;pig33419	VCL	ENSSSCT00000011289|ENSSSCT00000011290	Ssc.11071	ENSSSCG00000010313	396974	VCL	Vinculin|Vinculin (Metavinculin) [Source:UniProtKB/Swiss-Prot;Acc:P26234]	chrNA:-1--1	pig33418;pig33419	0.418283	-5.9528	-2.62951	0.441726	0.174909	14.6239	14.5005	11.7226	11.9808	12.0273	11.9259	12.6552	12.9535	14.8806	15.1606	11.5105	11.5373	14.6334	14.9562	12.7817	12.8182	11.9915	11.67	10.8723	11.5865
14030	pig33416;pig33417		ENSSSCT00000011289|ENSSSCT00000011288|ENSSSCT00000011290	Ssc.11071	ENSSSCG00000010313	396974	VCL	Vinculin|Vinculin (Metavinculin) [Source:UniProtKB/Swiss-Prot;Acc:P26234]	chrNA:-1--1	pig33416;pig33417	0.418059	-4.00313	-1.00102	0.25006	0.488306	11.4188	11.7305	10.9616	11.2891	10.6241	10.5905	11.1927	11.3358	11.9143	12.3353	10.6745	10.79	11.7178	12.2071	10.9297	11.0005	NaN	NaN	NaN	NaN
12399	pig37026;pig37027		ENSSSCT00000005763	Ssc.8564|Ssc.73573	ENSSSCG00000005229	100155277|100187578	VLDLR	Similar to very low density lipoprotein receptor VLDL-R2|Very low density lipoprotein receptor	chrNA:-1--1	pig37026;pig37027	0.233966	-4.04264	-0.999927	0.247345	0.512123	12.6401	12.5448	10.7955	10.7762	10.9838	11.4653	11.7548	11.6569	12.3913	12.3708	11.2244	11.1298	12.1838	11.8508	11.6345	11.9585	NaN	NaN	NaN	10.7557
1864	pig04592;pig04593		ENSSSCT00000012067		ENSSSCG00000011025		ZEB1	Zinc finger E-box-binding homeobox 1 (Transcription factor 8)(NIL-2-A zinc finger protein)(Negative regulator of IL2) [Source:UniProtKB/Swiss-Prot;Acc:P37275]	chrNA:-1--1	pig04592;pig04593	-1.12036	-4.14213	-0.431786	0.104242	0.742404	11.2316	11.2686	10.8933	10.7797	11.311	11.2613	11.0315	10.8389	11.1458	11.2541	NaN	NaN	11.4155	10.6477	10.7451	10.9183	NaN	NaN	10.8413	10.8265
7061	pig21515;pig21516		ENSSSCT00000007004	Ssc.56173	ENSSSCG00000006391			ATP1A2 mRNA, 3'UTR, allele 1	chrNA:-1--1	pig21515;pig21516	-0.335901	-13.653	-1.48153	0.108513	0.357396	12.1334	12.1221	10.9069	10.7673	11.1319	11.0652	11.9844	11.7725	12.3487	12.3045	10.7125	10.7987	12.3372	12.0007	10.6949	10.7765	NaN	NaN	NaN	10.7838
4788	pig14352;pig14353		ENSSSCT00000009083	Ssc.10316|Ssc.63051	ENSSSCG00000008294			Transcribed locus, strongly similar to NP_037025.1 actin, gamma 2, smooth muscle, enteric [Rattus norvegicus]|Transcribed locus, strongly similar to XP_001919666.1 PREDICTED: similar to alpha 2 actin [Danio rerio]	chrNA:-1--1	pig14352;pig14353	-0.613239	-9.692	-3.97015	0.409632	0.0694029	15.5345	15.5059	10.6646	NaN	11.0495	11.3253	12.8516	12.6979	15.228	15.2678	10.811	10.7861	15.1167	14.6164	11.9914	12.0672	NaN	NaN	NaN	10.7008
14791	pig41422		Ssc#S35173698	Ssc.6478				Transcribed locus, strongly similar to NP_083080.1 coiled-coil domain containing 3 precursor [Mus musculus]	chrNA:-1--1	pig41422	0.510277	-9.64499	-2.29838	0.238298	0.205195	14.9291	14.7181	10.9603	10.6352	13.1787	13.7638	13.4984	13.192	15.1921	14.7496	12.427	12.2362	14.7109	13.7535	12.8933	12.8388	NaN	NaN	NaN	10.5776
18681	pig75569		Ssc#S35171808	Ssc.54494				Transcribed locus, strongly similar to NP_780647.2 aldehyde dehydrogenase 4 family, member A1 [Mus musculus]	chrNA:-1--1	pig75569	1.16265	-7.85559	-1.76228	0.224335	0.289856	13.3366	12.9561	11.5367	11.2427	11.4846	11.2242	11.7384	11.7198	13.6457	12.9664	11.547	11.5804	12.644	12.6217	11.4531	11.2751	11.5478	11.6325	11.1222	11.7123
15613	pig47053		Ssc#S35723183	Ssc.17313				Transcribed locus, strongly similar to NP_037278.1 caldesmon 1 [Rattus norvegicus]	chrNA:-1--1	pig47053	0.616283	-7.85462	-1.2228	0.155679	0.428451	12.9444	13.2737	10.7111	10.9424	10.7492	10.8734	12.6582	12.7617	13.0618	13.2508	11.903	11.7731	12.526	12.4938	11.8352	12.1282	NaN	NaN	NaN	NaN
12440	pig37154;pig37155		ENSSSCT00000005834	Ssc.41632	ENSSSCG00000005297			Transcribed locus, strongly similar to NP_063927.1 DnaJ (Hsp40) homolog, subfamily B, member 5 [Mus musculus]	chrNA:-1--1	pig37154;pig37155	0.238489	-7.19991	-2.34752	0.326048	0.189554	12.5172	13.7395	NaN	10.7555	NaN	NaN	11.4615	11.6501	13.2076	13.4124	10.7506	10.7842	12.3294	13.0541	11.2008	10.7509	10.745	NaN	11.3832	12.2371
2558	pig07038;pig07039		ENSSSCT00000000381	Ssc.24290	ENSSSCG00000000359			Transcribed locus, strongly similar to NP_001478.1 biogenesis of lysosome-related organelles complex-1, subunit 1 [Homo sapiens]	chrNA:-1--1	pig07038;pig07039	-0.96936	-6.79628	-0.898174	0.132157	0.536309	11.6611	11.6853	11.2252	10.8931	11.0808	11.2724	11.3237	11.1563	11.9138	11.6377	NaN	NaN	11.5101	NaN	10.9877	10.7239	NaN	NaN	NaN	10.8979
3844	pig11419;pig11420		ENSSSCT00000003763	Ssc.55405	ENSSSCG00000003392			Transcribed locus, strongly similar to NP_001121046.1 hypothetical protein LOC691431 [Rattus norvegicus]	chrNA:-1--1	pig11419;pig11420	-0.748511	-6.48522	-0.902932	0.139229	0.533915	11.5706	11.5854	11.2723	10.9517	11.0833	11.2701	11.2885	11.0541	11.8379	11.4969	NaN	10.6563	11.4522	10.889	10.8822	10.6232	NaN	NaN	NaN	10.9172
14246	pig38754;pig38755		Ssc#S18387501	Ssc.1398				Transcribed locus, weakly similar to XP_001109397.1 PREDICTED: hypothetical protein [Macaca mulatta]	chrNA:-1--1	pig38754;pig38755	0.443565	-6.14998	-2.00767	0.326451	0.251372	13.7419	13.5202	11.1349	10.6223	11.4836	11.5132	11.9496	11.9604	13.8781	13.0268	11.3075	11.3979	13.0349	12.5966	12.1595	11.2715	11.6787	11.6424	10.7547	11.456
2633	pig07271;pig07272		ENSSSCT00000000508	Ssc.7873	ENSSSCG00000000470			Transcribed locus, strongly similar to NP_001026849.1 methionine sulfoxide reductase B3 isoform 2 [Homo sapiens]	chrNA:-1--1	pig07271;pig07272	-0.95431	-6.13689	-0.916864	0.149402	0.527188	11.6784	11.3969	10.985	10.6245	11.1926	11.1024	11.1649	10.9385	11.85	11.6422	NaN	10.7048	11.5675	10.6294	10.6073	NaN	NaN	NaN	NaN	10.7392
2246	pig05941;pig05942		ENSSSCT00000010308	Ssc.9601	ENSSSCG00000009408			Transcribed locus, moderately similar to NP_001157685.1 leucine-rich repeats and calponin homology (CH) domain containing 1 isoform 3 [Homo sapiens]	chrNA:-1--1	pig05941;pig05942	-1.0331	-5.66787	-0.968327	0.170845	0.511782	11.9721	11.9144	11.3707	11.3515	11.4028	11.51	11.8493	11.6717	12.2861	12.1347	10.9531	10.9965	12.0059	10.9538	11.3693	11.1151	NaN	NaN	10.7901	11.1086
8921	pig27006;pig27007		ENSSSCT00000014463	Ssc.20115	ENSSSCG00000013243			Transcribed locus, strongly similar to NP_000098.1 damage-specific DNA binding protein 2 [Homo sapiens]	chrNA:-1--1	pig27006;pig27007	-0.133422	-5.59236	-0.717168	0.128241	0.609528	11.7518	11.5316	11.0769	11.0346	10.8155	11.0378	11.2472	11.0846	11.6301	11.6383	10.8097	10.7911	11.4925	10.8905	11.0501	11.0323	NaN	NaN	NaN	10.9565
16207	pig50972		Ssc#S35173082	Ssc.24184				Transcribed locus, strongly similar to XP_418763.1 PREDICTED: similar to KIAA0089 [Gallus gallus]	chrNA:-1--1	pig50972	0.699778	-5.50825	-1.49957	0.272241	0.357673	13.935	13.8338	10.9552	11.035	11.976	12.2734	12.1595	12.1651	13.3507	13.5328	11.8733	11.8413	13.5159	13.6178	12.3575	12.5819	10.8159	11.2592	11.0771	13.1231
3921	pig11668;pig11669		ENSSSCT00000003886	Ssc.12920	ENSSSCG00000003498			Transcribed locus, moderately similar to NP_689589.1 UBX domain protein 10 [Homo sapiens]	chrNA:-1--1	pig11668;pig11669	-0.737141	-5.49517	-0.363214	0.066097	0.777543	11.2712	11.2949	11.3217	11.0492	11.0184	11.3087	11.2544	11.1837	11.2946	11.2502	NaN	NaN	11.4713	NaN	10.9447	10.8647	NaN	NaN	NaN	11.1994
1729	pig04080;pig04081		ENSSSCT00000011815	Ssc.45615	ENSSSCG00000010799			Transcribed locus, strongly similar to NP_001029061.1 component of oligomeric golgi complex 7 [Rattus norvegicus]	chrNA:-1--1	pig04080;pig04081	-1.15426	-5.22467	-0.681088	0.13036	0.625677	11.4332	11.4572	11.1689	10.7384	11.1488	11.2867	11.2195	10.9629	11.5246	11.3376	NaN	10.627	11.3575	10.6585	10.9744	10.7354	10.5896	NaN	NaN	11.1248
773	pig00884;pig00885		ENSSSCT00000018664	Ssc.42458	ENSSSCG00000017144			Transcribed locus, strongly similar to NP_032756.1 neuronal pentraxin 1 precursor [Mus musculus]	chrNA:-1--1	pig00884;pig00885	-1.48565	-4.91324	-0.607258	0.123596	0.658391	11.392	11.4897	10.8712	10.7337	11.327	11.3288	10.9282	10.6523	11.4219	11.3363	NaN	NaN	11.4461	10.5946	10.8199	10.7715	NaN	NaN	10.6465	11.0299
5175	pig15604;pig15605		ENSSSCT00000013443	Ssc.38558	ENSSSCG00000012294			Transcribed locus, strongly similar to XP_538034.2 PREDICTED: similar to Proteolipid protein 2 (Intestinal membrane A4 protein) (Differentiation-dependent protein A4) (Proteolipid protein 2) [Canis familiaris]	chrNA:-1--1	pig15604;pig15605	-0.562534	-4.90964	-1.7415	0.35471	0.298965	13.3839	13.2041	11.7692	11.5063	11.5757	11.7553	11.3444	11.3601	12.8182	12.3776	10.827	10.9116	12.6755	12.2269	11.7614	11.3178	10.7066	10.8417	NaN	11.2774
4897	pig14671;pig14672		ENSSSCT00000009240	Ssc.9000	ENSSSCG00000008439			Transcribed locus, strongly similar to NP_036381.2 ras-like protein TC10 precursor [Homo sapiens]	chrNA:-1--1	pig14671;pig14672	-0.59892	-4.85603	-1.17769	0.242521	0.44958	12.8885	12.6727	12.1844	11.9693	11.9994	12.253	11.6398	11.5822	13.0025	12.6154	11.3695	11.3265	12.5003	11.9382	12.0829	11.6893	11.1137	10.9705	10.598	11.612
14778	pig41356		Ssc#S35165160	Ssc.6382				Transcribed locus, strongly similar to NP_001096717.1 protein phosphatase 1, regulatory (inhibitor) subunit 3B [Bos taurus]	chrNA:-1--1	pig41356	0.508636	-4.81785	-0.83131	0.172548	0.566208	11.6784	11.6189	10.8326	11.0011	10.6016	10.7706	10.8625	10.6437	11.5614	11.8269	NaN	NaN	11.0991	10.9629	10.7194	11.1813	10.6264	NaN	10.7351	10.9795
774	pig00886;pig00887		ENSSSCT00000018666	Ssc.54900	ENSSSCG00000017146			Transcribed locus, moderately similar to XP_856622.1 PREDICTED: similar to chromosome 17 open reading frame 27 isoform 4 [Canis familiaris]	chrNA:-1--1	pig00886;pig00887	-1.48516	-4.71909	-0.703773	0.149133	0.615891	11.5646	11.6002	11.0576	10.8143	11.3847	11.5537	11.1275	10.8738	11.4111	11.3652	NaN	NaN	11.5856	10.7179	11.0121	10.8086	10.7048	NaN	10.968	11.2902
8735	pig26493;pig26494		ENSSSCT00000014195	Ssc.56108	ENSSSCG00000012985			Transcribed locus, strongly similar to NP_001123616.1 latent transforming growth factor beta binding protein 3 isoform 1 [Homo sapiens]	chrNA:-1--1	pig26493;pig26494	-0.153547	-4.5404	-0.559742	0.12328	0.677169	13.1591	12.9062	11.2245	11.1038	11.866	12.2391	11.9852	11.7518	12.9084	12.8811	12.3846	12.3495	12.9543	12.3674	12.3525	12.5292	10.8239	10.796	NaN	11.0376
20077	pig88934		Ssc#S26718964	Ssc.72806				Transcribed locus, strongly similar to XP_001927839.1 PREDICTED: similar to NADH dehydrogenase [ubiquinone] 1 beta subcomplex subunit 9 (NADH-ubiquinone oxidoreductase B22 subunit) (Complex I-B22) (CI-B22) [Sus scrofa]	chrNA:-1--1	pig88934	1.83169	-4.51164	-0.565745	0.125397	0.677289	NaN	NaN	10.6753	10.7585	11.1896	11.1443	11.0411	11.0547	11.4892	11.4072	10.8347	10.7605	11.798	11.2966	10.6901	11.0157	11.0878	11.2994	11.0884	10.7914
13008	pig12995		ENSSSCT00000008391|ENSSSCT00000008400	Ssc.16971	ENSSSCG00000007660|ENSSSCG00000007651			Transcribed locus, strongly similar to NP_062552.2 bin3, bicoid-interacting 3 [Homo sapiens]	chrNA:-1--1	pig12995	0.301296	-4.46953	-1.15497	0.258411	0.463244	12.5364	12.5792	11.4369	11.3822	12.287	12.0549	11.8672	11.8005	12.6686	12.5557	11.128	11.0057	12.5415	11.8454	11.7933	11.7929	NaN	NaN	NaN	10.654
6339	pig19289;pig19290		ENSSSCT00000017254	Ssc.73143	ENSSSCG00000015846			Transcribed locus, strongly similar to NP_001008710.1 RNA-binding protein with multiple splicing isoform A [Homo sapiens]	chrNA:-1--1	pig19289;pig19290	-0.419301	-4.46751	-1.17432	0.262858	0.438347	11.777	12.0289	10.7541	11.1377	10.9558	10.809	11.8711	12.1102	12.2923	12.6018	10.7606	10.8679	12.1966	12.6165	11.0326	11.3416	NaN	NaN	10.8856	11.7479
14508	pig39937		Ssc#S35169748	Ssc.3721				Transcribed locus, strongly similar to NP_001034349.1 WW domain containing E3 ubiquitin protein ligase 2 [Gallus gallus]	chrNA:-1--1	pig39937	0.475299	-4.40766	-1.96276	0.445306	0.23115	12.9709	13.0745	10.7609	11.0023	11.2509	11.2393	12.9181	13.1366	14.3046	14.4555	11.633	11.6247	12.9196	13.1814	11.7671	11.9296	NaN	NaN	10.7194	10.7034
8646	pig26258;pig26259		ENSSSCT00000014074	Ssc.30005	ENSSSCG00000012876			Transcribed locus, strongly similar to NP_001091985.1 MAS-related GPR, member F [Homo sapiens]	chrNA:-1--1	pig26258;pig26259	-0.162862	-4.36564	-0.621106	0.142271	0.651199	11.5411	11.4201	10.9423	10.7374	11.045	11.4351	10.8233	10.7429	11.6518	11.3895	NaN	NaN	11.6207	10.9322	11.0541	10.9603	NaN	10.7173	NaN	10.9072
15406	pig46279;pig46280		Ssc#S35173697	Ssc.15132				Transcribed locus, strongly similar to XP_537559.2 PREDICTED: similar to RAP2C, member of RAS oncogene family [Canis familiaris]	chrNA:-1--1	pig46279;pig46280	0.588983	-4.29128	-0.64543	0.150405	0.642615	12.7128	12.5415	NaN	NaN	11.3467	11.6427	11.6921	11.641	12.7142	12.7456	11.9342	11.9116	12.4687	12.4581	11.9728	12.3137	NaN	NaN	NaN	NaN
15175	pig44385		Ssc#S35167954	Ssc.11571				Transcribed locus, strongly similar to NP_001020454.1 family with sequence similarity 118, member B [Rattus norvegicus]	chrNA:-1--1	pig44385	0.558723	-4.28229	-0.490547	0.114552	0.713893	11.3776	11.4067	10.9432	10.8258	10.841	11.3361	10.8872	10.6244	11.3288	11.3376	10.8603	10.7146	11.0514	10.6516	10.8721	11.0416	NaN	NaN	NaN	NaN
1014	pig01655;pig01656		ENSSSCT00000019056	Ssc.66937	ENSSSCG00000017503			Transcribed locus, strongly similar to NP_006151.3 neurogenic differentiation 2 [Homo sapiens]	chrNA:-1--1	pig01655;pig01656	-1.37905	-4.27342	-0.593365	0.13885	0.666593	11.3303	11.3805	11.0722	10.9255	11.2037	11.2665	11.0924	10.8254	11.3617	11.2712	NaN	NaN	11.2921	NaN	11.0107	10.6718	NaN	NaN	NaN	10.9879
528	pig00100;pig00101		ENSSSCT00000017896	Ssc.1473	ENSSSCG00000016435			Transcribed locus, strongly similar to NP_080167.3 SWI/SNF related, matrix associated, actin dependent regulator of chromatin, subfamily d, member 3 [Mus musculus]	chrNA:-1--1	pig00100;pig00101	-1.6302	-4.2678	-1.69748	0.397742	0.289766	11.8065	13.3804	10.9511	10.8998	10.9466	11.1415	12.3853	12.3284	12.7811	12.9491	10.7919	10.9163	12.7385	12.0396	11.0861	11.3328	NaN	NaN	NaN	11.1961
14530	pig40030		Ssc#S35172204	Ssc.3977				Transcribed locus, strongly similar to XP_536952.2 PREDICTED: similar to CG8202-PA [Canis familiaris]	chrNA:-1--1	pig40030	0.477935	-4.2564	-0.606941	0.142595	0.655523	11.9296	12.1846	11.3958	11.4189	11.4584	11.9109	11.5417	11.4443	12.2467	12.2641	11.4752	11.482	12.1497	11.7416	11.516	11.7241	NaN	10.6043	NaN	10.6701
14196	pig38500;pig38501		Ssc#S35169980	Ssc.862				Transcribed locus, strongly similar to XP_001118490.1 PREDICTED: similar to phosphofructokinase, platelet, partial [Macaca mulatta]	chrNA:-1--1	pig38500;pig38501	0.437569	-4.21535	-1.79494	0.42581	0.305819	13.5645	13.538	11.2857	11.4268	11.9892	11.2793	11.5316	11.9823	14.0113	14.2513	11.4964	11.4478	13.3061	13.9569	12.7817	12.4596	12.0154	11.3547	11.9537	11.3524
6704	pig20428;pig20429		ENSSSCT00000017831	Ssc.11245	ENSSSCG00000016376			Transcribed locus, strongly similar to NP_001009825.1 protein phosphatase 1, regulatory (inhibitor) subunit 7 [Rattus norvegicus]	chrNA:-1--1	pig20428;pig20429	-0.376519	-4.20826	-0.793123	0.188468	0.581007	11.9081	11.8928	10.9322	10.9776	11.3042	11.6031	11.0528	10.9039	11.5871	11.7482	10.8425	10.7344	11.5217	11.211	11.1262	11.2605	NaN	NaN	NaN	10.6905
687	pig00631;pig00632		ENSSSCT00000018160	Ssc.19205	ENSSSCG00000016679			Transcribed locus, moderately similar to NP_076956.1 gamma-glutamyl cyclotransferase [Homo sapiens]	chrNA:-1--1	pig00631;pig00632	-1.53052	-4.13236	-0.692278	0.167526	0.624283	11.7649	11.601	11.3624	11.2016	11.7336	11.9262	11.402	11.1433	11.7284	11.6166	10.7652	10.9183	11.9236	11.1098	11.3098	10.9484	10.6424	NaN	10.8187	11.1077
3991	pig11898;pig11899		ENSSSCT00000003997	Ssc.1669	ENSSSCG00000003602			Transcribed locus, strongly similar to NP_036524.1 penta-EF-hand domain containing 1 [Homo sapiens]	chrNA:-1--1	pig11898;pig11899	-0.726457	-4.0985	-1.05412	0.257195	0.495668	12.6346	12.7095	11.4724	11.4898	12.2318	11.9039	11.6384	11.6306	12.4679	12.6304	11.1703	11.2563	12.6401	12.1792	11.7711	12.0283	NaN	NaN	NaN	NaN
3630	pig10803;pig10804		ENSSSCT00000003450	Ssc.4395	ENSSSCG00000003111			Transcribed locus, strongly similar to NP_005491.1 SUMO1 activating enzyme subunit 1 isoform a [Homo sapiens]	chrNA:-1--1	pig10803;pig10804	-0.780995	-4.09111	-0.63075	0.154176	0.646485	11.5672	11.4471	10.8161	10.8047	10.9976	10.9351	10.6757	10.6348	11.4778	11.7692	NaN	NaN	11.4427	10.9657	10.9251	11.1656	NaN	NaN	NaN	NaN
684	pig00622;pig00623		ENSSSCT00000018156	Ssc.13938	ENSSSCG00000016676			Transcribed locus, moderately similar to NP_001102492.1 indolethylamine N-methyltransferase [Rattus norvegicus]	chrNA:-1--1	pig00622;pig00623	-1.53229	-4.08252	-0.453813	0.11116	0.732383	11.546	11.5459	12.3135	11.6856	11.946	12.0551	12.2743	11.8615	11.5311	11.538	10.9931	11.1858	12.2069	11.2729	11.2126	10.9543	NaN	NaN	NaN	10.9273
4183	pig12488;pig12489		ENSSSCT00000004286	Ssc.58263	ENSSSCG00000003874			Transcribed locus, strongly similar to NP_055187.1 ring finger protein 11 [Homo sapiens]	chrNA:-1--1	pig12488;pig12489	-0.698164	-4.07165	-0.791861	0.194482	0.582778	11.744	11.788	11.2436	10.9803	11.3769	11.66	11.4527	11.3327	11.9145	11.566	10.753	10.7691	11.68	10.9041	11.3104	11.0125	10.589	NaN	NaN	10.9194
18352	pig72258;pig72259		Ssc#S19520269	Ssc.50315				Myotubularin related protein 3 (MTMR3) mRNA, 3' UTR	chrNA:-1--1	pig72258;pig72259	1.08216	-3.99977	-0.693957	0.1735	0.619589	12.8093	12.4523	11.4946	11.3577	11.7904	12.2839	12.0236	11.8774	12.6764	12.5027	11.8538	11.7227	12.4969	12.3554	11.898	12.1904	11.1904	11.2784	11.3381	11.3997
854	pig01138;pig01139		ENSSSCT00000018795	Ssc.33801	ENSSSCG00000017266			Transcribed locus, strongly similar to NP_001099319.1 coiled-coil domain containing 46 [Rattus norvegicus]	chrNA:-1--1	pig01138;pig01139	-1.44565	-3.97287	-0.511436	0.128732	0.704597	11.3257	11.3805	11.0066	10.7663	11.5025	11.3953	11.082	10.7409	11.4337	11.3954	NaN	NaN	11.6883	10.998	11.0828	10.9135	10.5855	NaN	10.7601	11.0998
3064	pig08919;pig08920		ENSSSCT00000009744	Ssc.12078	ENSSSCG00000008900			Transcribed locus, strongly similar to NP_079967.1 signal recognition particle 72 [Mus musculus]	chrNA:-1--1	pig08919;pig08920	-0.87521	-3.94795	-0.403085	0.1021	0.756502	11.3346	11.4106	11.1679	11.0201	11.1953	11.2418	11.1419	11.0143	11.2556	11.2571	10.8159	10.861	11.3746	NaN	10.9896	10.9791	NaN	NaN	NaN	11.0178
3556	pig10569;pig10570		ENSSSCT00000003327	Ssc.31705	ENSSSCG00000002995			Transcribed locus, strongly similar to NP_001004083.1 EGL nine homolog 2 [Rattus norvegicus]	chrNA:-1--1	pig10569;pig10570	-0.793133	-3.91784	-0.872373	0.222667	0.555547	11.6278	11.741	11.051	10.7181	11.5703	11.5345	11.117	10.9481	11.9288	11.8397	10.6245	10.6547	11.8529	10.9879	11.3073	11.0612	NaN	NaN	10.6262	11.0519
13902	pig27278;pig27279		ENSSSCT00000014597|ENSSSCT00000014598	Ssc.50275|Ssc.71152	ENSSSCG00000013366			Lactate dehydrogenase-A (LDH-A)	chrNA:-1--1	pig27278;pig27279	0.402981	-3.91216	-0.985054	0.251793	0.497848	14.2007	13.9685	15.0839	15.1277	12.7456	13.0525	12.2305	12.0212	13.6417	13.3931	12.6695	12.6087	13.915	13.2801	12.9411	13.0445	10.5849	NaN	10.6927	11.5795
2090	pig05413;pig05414		ENSSSCT00000018525	Ssc.47560	ENSSSCG00000017013			Transcribed locus, strongly similar to NP_001004147.1 fibrillarin-like 1 [Mus musculus]	chrNA:-1--1	pig05413;pig05414	-1.06766	-3.85715	-0.377693	0.0979204	0.770284	11.0879	11.0738	11.0316	10.8935	11.4096	11.2526	11.0852	10.826	11.1552	11.0138	NaN	NaN	11.4794	10.6127	10.8269	10.711	NaN	NaN	NaN	10.8921
1947	pig04872;pig04873		ENSSSCT00000012220	Ssc.47837	ENSSSCG00000011158			Transcribed locus, moderately similar to NP_062677.1 phosphofructokinase, platelet [Mus musculus]	chrNA:-1--1	pig04872;pig04873	-1.10063	-3.84636	-0.729412	0.189637	0.61084	11.8158	11.7932	11.1399	10.8263	11.3991	11.4736	11.1439	11.0149	11.6893	11.6366	NaN	NaN	11.771	11.0127	11.353	11.0978	10.6278	NaN	NaN	10.9904
2819	pig07905;pig07906		ENSSSCT00000000823	Ssc.24595	ENSSSCG00000000759			Transcribed locus, strongly similar to NP_033551.2 wingless-related MMTV integration site 5B precursor [Mus musculus]	chrNA:-1--1	pig07905;pig07906	-0.919239	-3.82975	-0.727569	0.189978	0.60917	11.5936	11.7083	11.1833	10.9877	11.4986	11.4965	11.1897	10.9885	11.7208	11.426	10.6251	10.768	11.7919	10.9935	11.2203	10.9249	NaN	NaN	10.6169	10.9735
853	pig01134;pig01135		ENSSSCT00000018793	Ssc.58183	ENSSSCG00000017264			Transcribed locus, moderately similar to NP_057711.3 archaemetzincins-2 isoform 1 [Homo sapiens]	chrNA:-1--1	pig01134;pig01135	-1.44621	-3.82896	-0.529792	0.138364	0.693275	11.5368	11.6779	11.724	11.4734	11.3186	11.3953	11.5157	11.4033	11.3946	11.4668	10.7967	10.9699	11.5417	10.7376	11.1081	11.0822	NaN	NaN	NaN	11.0972
1238	pig02444;pig02445		ENSSSCT00000019455	Ssc.31187	ENSSSCG00000017878			Transcribed locus, strongly similar to NP_956157.1 ubiquitin-conjugating enzyme E2G 1 [Danio rerio]	chrNA:-1--1	pig02444;pig02445	-1.29684	-3.77355	-0.895699	0.237363	0.550425	11.7011	11.8248	11.3146	11.1433	11.3397	11.4278	11.3705	11.1922	11.9504	11.7721	10.6172	10.6802	11.8503	10.7282	11.4301	10.9381	NaN	NaN	10.5831	11.1433
1168	pig02197;pig02198		ENSSSCT00000019331	Ssc.1187	ENSSSCG00000017759			Transcribed locus, strongly similar to NP_036629.1 fructose-bisphosphate aldolase C [Rattus norvegicus]	chrNA:-1--1	pig02197;pig02198	-1.32093	-3.77302	-0.945592	0.250619	0.519127	12.1874	12.0317	11.3921	10.9506	11.2709	11.3974	11.4573	11.2406	11.8669	11.4972	10.6772	10.9412	11.7397	10.8127	11.3446	10.8376	NaN	NaN	NaN	10.8276
1246	pig02466;pig02467		ENSSSCT00000019466	Ssc.57506	ENSSSCG00000017889			Transcribed locus, moderately similar to XP_001789831.1 PREDICTED: hypothetical protein [Bos taurus]	chrNA:-1--1	pig02466;pig02467	-1.2943	-3.68894	-1.03253	0.279897	0.482775	13.7173	13.5358	13.6371	12.3453	13.3341	12.9872	13.6548	13.069	13.2938	12.8227	12.1137	12.2209	13.7936	12.6582	12.7007	12.2042	12.3835	11.8173	11.5077	13.2122
6465	pig19699;pig19700		ENSSSCT00000017458	Ssc.8661	ENSSSCG00000016033			Transcribed locus, strongly similar to NP_057399.1 GULP, engulfment adaptor PTB domain containing 1 [Homo sapiens]	chrNA:-1--1	pig19699;pig19700	-0.404398	-3.68606	-0.828983	0.224897	0.561606	12.0239	11.7857	10.9121	NaN	11.4832	11.5994	11.3038	11.1251	12.0616	11.4727	10.8292	10.9474	11.8292	11.3284	11.3528	10.8985	10.5833	10.6022	10.7147	11.0462
1798	pig04347;pig04348		ENSSSCT00000011941	Ssc.40948	ENSSSCG00000010911			Transcribed locus, strongly similar to NP_036614.1 zinc finger protein 281 [Homo sapiens]	chrNA:-1--1	pig04347;pig04348	-1.13623	-3.68219	-0.461973	0.125461	0.727484	11.2941	11.3005	11.3457	11.1645	11.5413	11.5211	11.3457	11.0971	11.4694	11.3	10.7949	10.8597	11.6118	11.0053	11.0763	10.7851	NaN	NaN	10.5891	10.863

## Sheet: Suppl. Table S1 Vein
Annotation Cluster 1	Enrichment Score: 5.614845886765641
Category	Term	Count	%	PValue	Genes	List Total	Pop Hits	Pop Total	Fold Enrichment	Bonferroni	Benjamini	FDR
SP_PIR_KEYWORDS	glycoprotein	47	47.9592	4.99283e-08	PAM, IGFBP6, TSPAN5, TLR2, IFI30, PLVAP, ABCA1, C1QC, CD74, S1PR1, UNC5A, CRISPLD2, P4HA1, P4HA3, COL6A3, CLEC2D, LRRC70, SLC39A8, SEPP1, THBS1, FCGR3B, THBS4, SVEP1, LIPA, LY96, GALNTL2, GOLIM4, HBA2, C4BPA, HBA1, PTGFR, ADIPOQ, PROC, PCOLCE2, CD163, GGT5, TNFAIP6, CTSK, SDC1, CCL14, SFRP4, PECAM1, COL1A2, CYBRD1, SGCE, IGFBP2, RCN1, IL3RA	98	4318	19235	2.13639	1.27816e-05	1.27816e-05	6.51036e-05
SP_PIR_KEYWORDS	signal	38	38.7755	4.57513e-07	PAM, IGFBP6, TLR2, IFI30, C1QC, CRISPLD2, P4HA1, UNC5A, P4HA3, COL6A3, LRRC70, SEPP1, MGC29506, COL8A1, THBS1, FCGR3B, THBS4, LIPA, SVEP1, EGFL7, RNASE4, LY96, C4BPA, ADIPOQ, CD163, PCOLCE2, PROC, TNFAIP6, CTSK, MAGT1, SDC1, CCL14, SFRP4, PECAM1, COL1A2, IGFBP2, IL3RA, RCN1	98	3250	19235	2.29491	0.000117117	5.856e-05	0.000596569
UP_SEQ_FEATURE	signal peptide	38	38.7755	5.37773e-07	PAM, IGFBP6, TLR2, IFI30, C1QC, CRISPLD2, P4HA1, UNC5A, P4HA3, COL6A3, LRRC70, SEPP1, MGC29506, COL8A1, THBS1, FCGR3B, THBS4, LIPA, SVEP1, EGFL7, RNASE4, LY96, C4BPA, ADIPOQ, CD163, PCOLCE2, PROC, TNFAIP6, CTSK, MAGT1, SDC1, CCL14, SFRP4, PECAM1, COL1A2, IGFBP2, IL3RA, RCN1	98	3250	19113	2.28036	0.000258636	0.000258636	0.000770194
UP_SEQ_FEATURE	disulfide bond	34	34.6939	1.62563e-06	PAM, IGFBP6, TLR2, IFI30, ABCA1, UQCRFS1, C1QC, CD74, CRISPLD2, UNC5A, COL6A3, CLEC2D, THBS1, FCGR3B, THBS4, SVEP1, EGFL7, LGALS3, RNASE4, LY96, GALNTL2, C4BPA, PTGFR, ADIPOQ, CD163, PCOLCE2, PROC, TNFAIP6, CTSK, CCL14, PRDX6, PECAM1, SFRP4, IGFBP2	98	2819	19113	2.35227	0.000781621	0.000390887	0.00232819
SP_PIR_KEYWORDS	disulfide bond	34	34.6939	3.20353e-06	PAM, IGFBP6, TLR2, IFI30, ABCA1, UQCRFS1, C1QC, CD74, CRISPLD2, UNC5A, COL6A3, CLEC2D, THBS1, FCGR3B, THBS4, SVEP1, EGFL7, LGALS3, RNASE4, LY96, GALNTL2, C4BPA, PTGFR, ADIPOQ, CD163, PCOLCE2, PROC, TNFAIP6, CTSK, CCL14, PRDX6, PECAM1, SFRP4, IGFBP2	98	2924	19235	2.28227	0.000819768	0.000273331	0.00417713
GOTERM_CC_FAT	GO:0005576~extracellular region	30	30.6122	7.57533e-06	PAM, IGFBP6, IFI30, C1QC, RTN3, CRISPLD2, COL6A3, MGC29506, SEPP1, COL8A1, THBS1, FCGR3B, THBS4, SVEP1, EGFL7, LGALS3, LY96, RNASE4, C4BPA, ADIPOQ, PCOLCE2, CD163, PROC, CTSK, CCL14, PPIA, PECAM1, SFRP4, COL1A2, IGFBP2	82	2010	12782	2.32654	0.00146098	0.00146098	0.00943907
UP_SEQ_FEATURE	glycosylation site:N-linked (GlcNAc...)	41	41.8367	9.97354e-06	PAM, TSPAN5, TLR2, IFI30, PLVAP, ABCA1, CD74, S1PR1, UNC5A, CRISPLD2, P4HA1, P4HA3, COL6A3, CLEC2D, LRRC70, SLC39A8, SEPP1, THBS1, FCGR3B, THBS4, LIPA, SVEP1, LY96, GALNTL2, GOLIM4, C4BPA, PTGFR, CD163, PCOLCE2, PROC, GGT5, TNFAIP6, CTSK, SDC1, SFRP4, PECAM1, COL1A2, CYBRD1, SGCE, IL3RA, RCN1	98	4129	19113	1.93661	0.00478581	0.00159782	0.0142831
SP_PIR_KEYWORDS	Secreted	21	21.4286	0.00024945	PAM, SVEP1, EGFL7, RNASE4, LY96, IGFBP6, C4BPA, C1QC, ADIPOQ, CD163, PCOLCE2, CCL14, CRISPLD2, COL6A3, SFRP4, COL1A2, MGC29506, SEPP1, COL8A1, IGFBP2, FCGR3B	98	1689	19235	2.44037	0.0618704	0.00707123	0.32478
Annotation Cluster 2	Enrichment Score: 4.214019848005807
Category	Term	Count	%	PValue	Genes	List Total	Pop Hits	Pop Total	Fold Enrichment	Bonferroni	Benjamini	FDR
GOTERM_CC_FAT	GO:0005576~extracellular region	30	30.6122	7.57533e-06	PAM, IGFBP6, IFI30, C1QC, RTN3, CRISPLD2, COL6A3, MGC29506, SEPP1, COL8A1, THBS1, FCGR3B, THBS4, SVEP1, EGFL7, LGALS3, LY96, RNASE4, C4BPA, ADIPOQ, PCOLCE2, CD163, PROC, CTSK, CCL14, PPIA, PECAM1, SFRP4, COL1A2, IGFBP2	82	2010	12782	2.32654	0.00146098	0.00146098	0.00943907
GOTERM_CC_FAT	GO:0044421~extracellular region part	18	18.3673	8.72593e-05	LGALS3, EGFL7, LY96, IGFBP6, ADIPOQ, RTN3, CTSK, CCL14, CRISPLD2, PECAM1, COL6A3, SFRP4, COL1A2, SEPP1, THBS1, COL8A1, IGFBP2, THBS4	82	960	12782	2.92271	0.0167007	0.00838553	0.108678
GOTERM_CC_FAT	GO:0005615~extracellular space	14	14.2857	0.000344927	EGFL7, LY96, IGFBP6, ADIPOQ, RTN3, CTSK, CCL14, PECAM1, SFRP4, COL6A3, COL1A2, SEPP1, THBS1, IGFBP2	82	685	12782	3.18583	0.0644142	0.0219497	0.428959
Annotation Cluster 3	Enrichment Score: 3.9840558787703735
Category	Term	Count	%	PValue	Genes	List Total	Pop Hits	Pop Total	Fold Enrichment	Bonferroni	Benjamini	FDR
SP_PIR_KEYWORDS	oxidoreductase	13	13.2653	2.5604e-05	PAM, SCD, IFI30, UQCRFS1, PHYH, ALDH1A1, RDH10, CYP27A1, PRDX6, P4HA1, P4HA3, CYBRD1, FASN	98	562	19235	4.54018	0.00653326	0.00131008	0.0333809
SP_PIR_KEYWORDS	iron	9	9.18367	9.7309e-05	CYP27A1, P4HA1, SCD, P4HA3, CYCS, CYBRD1, HBA2, HBA1, UQCRFS1, PHYH	98	285	19235	6.19817	0.0246046	0.00355258	0.126811
GOTERM_BP_FAT	GO:0055114~oxidation reduction	14	14.2857	9.98542e-05	PAM, SCD, CYCS, IFI30, UQCRFS1, PHYH, ALDH1A1, RDH10, CYP27A1, PRDX6, P4HA1, P4HA3, CYBRD1, FASN	82	639	13528	3.61449	0.108311	0.108311	0.16042
GOTERM_MF_FAT	GO:0005506~iron ion binding	9	9.18367	0.000465532	CYP27A1, P4HA1, SCD, P4HA3, CYCS, CYBRD1, HBA2, HBA1, UQCRFS1, PHYH	78	308	12983	4.86376	0.123871	0.0217992	0.615134
Annotation Cluster 4	Enrichment Score: 3.0467150930797455
Category	Term	Count	%	PValue	Genes	List Total	Pop Hits	Pop Total	Fold Enrichment	Bonferroni	Benjamini	FDR
GOTERM_MF_FAT	GO:0005539~glycosaminoglycan binding	7	7.14286	0.000178602	TNFAIP6, CCL14, CRISPLD2, TLR2, THBS1, PCOLCE2, THBS4	78	140	12983	8.32244	0.0494622	0.0494622	0.236411
GOTERM_MF_FAT	GO:0030246~carbohydrate binding	10	10.2041	0.000236885	TNFAIP6, CCL14, LGALS3, CRISPLD2, CLEC2D, GALNTL2, TLR2, THBS1, PCOLCE2, THBS4	78	354	12983	4.70194	0.0650698	0.0221782	0.313449
GOTERM_MF_FAT	GO:0030247~polysaccharide binding	7	7.14286	0.000299335	TNFAIP6, CCL14, CRISPLD2, TLR2, THBS1, PCOLCE2, THBS4	78	154	12983	7.56585	0.0815095	0.016861	0.39593
GOTERM_MF_FAT	GO:0001871~pattern binding	7	7.14286	0.000299335	TNFAIP6, CCL14, CRISPLD2, TLR2, THBS1, PCOLCE2, THBS4	78	154	12983	7.56585	0.0815095	0.016861	0.39593
GOTERM_MF_FAT	GO:0008201~heparin binding	5	5.10204	0.00324493	CCL14, CRISPLD2, THBS1, PCOLCE2, THBS4	78	103	12983	8.08003	0.602698	0.123541	4.21551
SP_PIR_KEYWORDS	heparin-binding	3	3.06122	0.042635	CCL14, THBS1, PCOLCE2	98	65	19235	9.05887	0.999986	0.338413	43.3419
Annotation Cluster 5	Enrichment Score: 2.6722881013853113
Category	Term	Count	%	PValue	Genes	List Total	Pop Hits	Pop Total	Fold Enrichment	Bonferroni	Benjamini	FDR
SP_PIR_KEYWORDS	collagen	7	7.14286	8.51544e-06	P4HA1, COL6A3, COL1A2, COL8A1, C1QC, ADIPOQ, PCOLCE2	98	95	19235	14.4624	0.00217759	0.000544842	0.0111031
SP_PIR_KEYWORDS	hydroxylation	6	6.12245	2.94114e-05	COL6A3, COL1A2, COL8A1, C1QC, ADIPOQ, PROC	98	71	19235	16.5867	0.00750115	0.00125412	0.0383439
SP_PIR_KEYWORDS	hydroxyproline	4	4.08163	0.000852974	COL6A3, COL1A2, C1QC, ADIPOQ	98	37	19235	21.219	0.19624	0.0180398	1.10653
INTERPRO	IPR008160:Collagen triple helix repeat	5	5.10204	0.00119968	COL6A3, COL1A2, COL8A1, C1QC, ADIPOQ	93	84	16659	10.6624	0.272475	0.272475	1.56141
SP_PIR_KEYWORDS	hydroxylysine	3	3.06122	0.0106417	COL6A3, COL1A2, C1QC	98	31	19235	18.9944	0.935357	0.15733	13.0212
SP_PIR_KEYWORDS	triple helix	3	3.06122	0.0106417	COL6A3, COL1A2, C1QC	98	31	19235	18.9944	0.935357	0.15733	13.0212
UP_SEQ_FEATURE	domain:C1q	3	3.06122	0.0107715	COL8A1, C1QC, ADIPOQ	98	31	19113	18.8739	0.994534	0.478554	14.3675
INTERPRO	IPR001073:Complement C1q protein	3	3.06122	0.013437	COL8A1, C1QC, ADIPOQ	93	32	16659	16.7933	0.972262	0.591899	16.2517
SMART	SM00110:C1Q	3	3.06122	0.0175955	COL8A1, C1QC, ADIPOQ	59	32	9079	14.4264	0.678943	0.433381	16.5018
INTERPRO	IPR008983:Tumour necrosis factor-like	3	3.06122	0.0256087	COL8A1, C1QC, ADIPOQ	93	45	16659	11.9419	0.998966	0.576559	28.8304
Annotation Cluster 6	Enrichment Score: 2.5653208220612567
Category	Term	Count	%	PValue	Genes	List Total	Pop Hits	Pop Total	Fold Enrichment	Bonferroni	Benjamini	FDR
GOTERM_CC_FAT	GO:0031410~cytoplasmic vesicle	12	12.2449	0.0023178	PAM, PRDX6, CRISPLD2, PECAM1, GOLIM4, GALNTL2, FASN, AP3S1, ABCA1, IGFBP2, THBS1, THBS4	82	642	12782	2.91361	0.361003	0.105923	2.85012
GOTERM_CC_FAT	GO:0016023~cytoplasmic membrane-bounded vesicle	11	11.2245	0.00241063	PAM, PRDX6, CRISPLD2, PECAM1, GOLIM4, GALNTL2, FASN, AP3S1, ABCA1, THBS1, THBS4	82	550	12782	3.11756	0.372376	0.0889547	2.9627
GOTERM_CC_FAT	GO:0031988~membrane-bounded vesicle	11	11.2245	0.00304202	PAM, PRDX6, CRISPLD2, PECAM1, GOLIM4, GALNTL2, FASN, AP3S1, ABCA1, THBS1, THBS4	82	568	12782	3.01877	0.444566	0.0933518	3.72522
GOTERM_CC_FAT	GO:0031982~vesicle	12	12.2449	0.00322365	PAM, PRDX6, CRISPLD2, PECAM1, GOLIM4, GALNTL2, FASN, AP3S1, ABCA1, IGFBP2, THBS1, THBS4	82	670	12782	2.79185	0.463757	0.0851765	3.94355
Annotation Cluster 7	Enrichment Score: 2.47254085273113
Category	Term	Count	%	PValue	Genes	List Total	Pop Hits	Pop Total	Fold Enrichment	Bonferroni	Benjamini	FDR
UP_SEQ_FEATURE	domain:Thyroglobulin type-1	3	3.06122	0.00191723	IGFBP6, IGFBP2, CD74	98	13	19113	45.0071	0.602704	0.168575	2.71106
INTERPRO	IPR000716:Thyroglobulin type-1	3	3.06122	0.00388737	IGFBP6, IGFBP2, CD74	93	17	16659	31.611	0.643764	0.403144	4.97809
SMART	SM00211:TY	3	3.06122	0.00512917	IGFBP6, IGFBP2, CD74	59	17	9079	27.1555	0.280437	0.280437	5.09003
Annotation Cluster 8	Enrichment Score: 2.3936940928846457
Category	Term	Count	%	PValue	Genes	List Total	Pop Hits	Pop Total	Fold Enrichment	Bonferroni	Benjamini	FDR
GOTERM_BP_FAT	GO:0009719~response to endogenous stimulus	11	11.2245	0.000145892	SDC1, BTG2, PPARG, AP3S1, FABP4, GNG11, UQCRFS1, IGFBP2, THBS1, ADIPOQ, MGST1	82	405	13528	4.48082	0.15422	0.0803369	0.2343
GOTERM_BP_FAT	GO:0042493~response to drug	8	8.16327	0.000306786	PPARG, TLR2, FABP4, UQCRFS1, IGFBP2, ADIPOQ, MGST1, APC	82	216	13528	6.11021	0.296892	0.110784	0.492098
GOTERM_BP_FAT	GO:0009725~response to hormone stimulus	10	10.2041	0.000336381	SDC1, BTG2, PPARG, AP3S1, FABP4, GNG11, UQCRFS1, IGFBP2, THBS1, ADIPOQ	82	367	13528	4.49525	0.320386	0.0920425	0.539449
GOTERM_BP_FAT	GO:0010033~response to organic substance	13	13.2653	0.00114714	LY96, PPARG, TLR2, AP3S1, GNG11, UQCRFS1, ADIPOQ, SDC1, BTG2, FABP4, THBS1, IGFBP2, MGST1	82	721	13528	2.97459	0.732241	0.231668	1.82845
GOTERM_BP_FAT	GO:0048545~response to steroid hormone stimulus	6	6.12245	0.00586308	SDC1, PPARG, FABP4, IGFBP2, THBS1, ADIPOQ	82	192	13528	5.15549	0.99883	0.430247	9.02099
GOTERM_BP_FAT	GO:0051384~response to glucocorticoid stimulus	4	4.08163	0.0114001	SDC1, FABP4, IGFBP2, ADIPOQ	82	78	13528	8.46029	0.999998	0.518692	16.8345
GOTERM_BP_FAT	GO:0031960~response to corticosteroid stimulus	4	4.08163	0.0143668	SDC1, FABP4, IGFBP2, ADIPOQ	82	85	13528	7.76356	1	0.514361	20.7575
GOTERM_BP_FAT	GO:0032870~cellular response to hormone stimulus	4	4.08163	0.0455307	PPARG, AP3S1, GNG11, IGFBP2	82	133	13528	4.96167	1	0.746327	52.7261
GOTERM_BP_FAT	GO:0009628~response to abiotic stimulus	4	4.08163	0.379091	BTG2, PPARG, IGFBP2, THBS1	82	368	13528	1.79321	1	0.985608	99.953
Annotation Cluster 9	Enrichment Score: 2.352532563666711
Category	Term	Count	%	PValue	Genes	List Total	Pop Hits	Pop Total	Fold Enrichment	Bonferroni	Benjamini	FDR
SP_PIR_KEYWORDS	vitamin c	4	4.08163	0.000113606	PAM, P4HA1, P4HA3, PHYH	98	19	19235	41.3212	0.0286659	0.003629	0.148034
GOTERM_MF_FAT	GO:0031406~carboxylic acid binding	7	7.14286	0.000208207	PAM, P4HA1, P4HA3, PPARG, FASN, FABP4, PHYH	78	144	12983	8.09126	0.0574224	0.0291356	0.27555
GOTERM_MF_FAT	GO:0031418~L-ascorbic acid binding	4	4.08163	0.000247036	PAM, P4HA1, P4HA3, PHYH	78	21	12983	31.7045	0.0677618	0.0173888	0.32686
GOTERM_MF_FAT	GO:0019842~vitamin binding	5	5.10204	0.00739488	PAM, P4HA1, P4HA3, FASN, PHYH	78	130	12983	6.40187	0.878513	0.208809	9.36736
UP_SEQ_FEATURE	metal ion-binding site:Iron	3	3.06122	0.0228264	P4HA1, P4HA3, PHYH	98	46	19113	12.7194	0.999985	0.708899	28.1585
SP_PIR_KEYWORDS	dioxygenase	3	3.06122	0.0438261	P4HA1, P4HA3, PHYH	98	66	19235	8.92161	0.99999	0.336178	44.2542
GOTERM_MF_FAT	GO:0016702~oxidoreductase activity, acting on single donors with incorporation of molecular oxygen, incorporation of two atoms of oxygen	3	3.06122	0.0583746	P4HA1, P4HA3, PHYH	78	66	12983	7.56585	1	0.788368	54.9337
GOTERM_MF_FAT	GO:0016701~oxidoreductase activity, acting on single donors with incorporation of molecular oxygen	3	3.06122	0.0599455	P4HA1, P4HA3, PHYH	78	67	12983	7.45293	1	0.768462	55.9199
Annotation Cluster 10	Enrichment Score: 2.2421090706263436
Category	Term	Count	%	PValue	Genes	List Total	Pop Hits	Pop Total	Fold Enrichment	Bonferroni	Benjamini	FDR
SP_PIR_KEYWORDS	collagen	7	7.14286	8.51544e-06	P4HA1, COL6A3, COL1A2, COL8A1, C1QC, ADIPOQ, PCOLCE2	98	95	19235	14.4624	0.00217759	0.000544842	0.0111031
SP_PIR_KEYWORDS	hydroxylation	6	6.12245	2.94114e-05	COL6A3, COL1A2, COL8A1, C1QC, ADIPOQ, PROC	98	71	19235	16.5867	0.00750115	0.00125412	0.0383439
INTERPRO	IPR008160:Collagen triple helix repeat	5	5.10204	0.00119968	COL6A3, COL1A2, COL8A1, C1QC, ADIPOQ	93	84	16659	10.6624	0.272475	0.272475	1.56141
GOTERM_CC_FAT	GO:0005581~collagen	3	3.06122	0.0206151	COL6A3, COL1A2, COL8A1	82	35	12782	13.361	0.982052	0.360264	22.8614
GOTERM_CC_FAT	GO:0031012~extracellular matrix	7	7.14286	0.0220851	LGALS3, CRISPLD2, COL6A3, COL1A2, COL8A1, THBS1, THBS4	82	345	12782	3.16274	0.986569	0.350154	24.2917
GOTERM_CC_FAT	GO:0005578~proteinaceous extracellular matrix	5	5.10204	0.145077	LGALS3, COL6A3, COL1A2, COL8A1, THBS4	82	320	12782	2.43559	1	0.731601	85.8174
GOTERM_CC_FAT	GO:0044420~extracellular matrix part	3	3.06122	0.1696	COL6A3, COL1A2, COL8A1	82	117	12782	3.99687	1	0.761824	90.1315
SP_PIR_KEYWORDS	extracellular matrix	3	3.06122	0.343581	COL6A3, COL1A2, COL8A1	98	241	19235	2.44326	1	0.87913	99.5868
Annotation Cluster 11	Enrichment Score: 2.0663340921245577
Category	Term	Count	%	PValue	Genes	List Total	Pop Hits	Pop Total	Fold Enrichment	Bonferroni	Benjamini	FDR
GOTERM_BP_FAT	GO:0045596~negative regulation of cell differentiation	7	7.14286	0.00185353	LMO2, PPARG, ABCA1, C1QC, ADIPOQ, CD74, APC	82	216	13528	5.34643	0.881143	0.262332	2.93875
GOTERM_BP_FAT	GO:0045637~regulation of myeloid cell differentiation	4	4.08163	0.00848724	LMO2, C1QC, ADIPOQ, APC	82	70	13528	9.42718	0.999944	0.528901	12.8061
GOTERM_BP_FAT	GO:0045638~negative regulation of myeloid cell differentiation	3	3.06122	0.0138188	LMO2, C1QC, ADIPOQ	82	30	13528	16.4976	1	0.532658	20.0462
GOTERM_BP_FAT	GO:0002761~regulation of myeloid leukocyte differentiation	3	3.06122	0.0249705	C1QC, ADIPOQ, APC	82	41	13528	12.0714	1	0.620033	33.4064
Annotation Cluster 12	Enrichment Score: 2.027229268509668
Category	Term	Count	%	PValue	Genes	List Total	Pop Hits	Pop Total	Fold Enrichment	Bonferroni	Benjamini	FDR
GOTERM_BP_FAT	GO:0045596~negative regulation of cell differentiation	7	7.14286	0.00185353	LMO2, PPARG, ABCA1, C1QC, ADIPOQ, CD74, APC	82	216	13528	5.34643	0.881143	0.262332	2.93875
GOTERM_BP_FAT	GO:0010745~negative regulation of foam cell differentiation	3	3.06122	0.00224788	PPARG, ABCA1, ADIPOQ	82	12	13528	41.2439	0.924489	0.275979	3.55344
GOTERM_BP_FAT	GO:0010743~regulation of foam cell differentiation	3	3.06122	0.00971581	PPARG, ABCA1, ADIPOQ	82	25	13528	19.7971	0.999986	0.503672	14.5271
GOTERM_BP_FAT	GO:0048878~chemical homeostasis	6	6.12245	0.192234	CCL14, S1PR1, PPARG, FABP4, ABCA1, ADIPOQ	82	512	13528	1.93331	1	0.92626	96.7687
Annotation Cluster 13	Enrichment Score: 2.0051925200721796
Category	Term	Count	%	PValue	Genes	List Total	Pop Hits	Pop Total	Fold Enrichment	Bonferroni	Benjamini	FDR
SP_PIR_KEYWORDS	trimer	4	4.08163	0.000297119	COL6A3, COL1A2, THBS1, THBS4	98	26	19235	30.1962	0.0732522	0.00757851	0.386734
UP_SEQ_FEATURE	short sequence motif:Cell attachment site	5	5.10204	0.00104916	SVEP1, COL6A3, IGFBP2, THBS1, THBS4	98	88	19113	11.0813	0.396442	0.118586	1.49215
KEGG_PATHWAY	hsa04512:ECM-receptor interaction	5	5.10204	0.00776151	SDC1, COL6A3, COL1A2, THBS1, THBS4	49	84	5085	6.17711	0.392665	0.220683	7.61052
GOTERM_CC_FAT	GO:0031012~extracellular matrix	7	7.14286	0.0220851	LGALS3, CRISPLD2, COL6A3, COL1A2, COL8A1, THBS1, THBS4	82	345	12782	3.16274	0.986569	0.350154	24.2917
KEGG_PATHWAY	hsa04510:Focal adhesion	5	5.10204	0.120068	PAK3, COL6A3, COL1A2, THBS1, THBS4	49	201	5085	2.58148	0.999722	0.870823	72.7318
GOTERM_CC_FAT	GO:0005578~proteinaceous extracellular matrix	5	5.10204	0.145077	LGALS3, COL6A3, COL1A2, COL8A1, THBS4	82	320	12782	2.43559	1	0.731601	85.8174
Annotation Cluster 14	Enrichment Score: 1.9812116635018062
Category	Term	Count	%	PValue	Genes	List Total	Pop Hits	Pop Total	Fold Enrichment	Bonferroni	Benjamini	FDR
UP_SEQ_FEATURE	short sequence motif:Cell attachment site	5	5.10204	0.00104916	SVEP1, COL6A3, IGFBP2, THBS1, THBS4	98	88	19113	11.0813	0.396442	0.118586	1.49215
SP_PIR_KEYWORDS	cell adhesion	7	7.14286	0.0199771	TNFAIP6, SVEP1, COL6A3, PECAM1, COL8A1, THBS1, THBS4	98	422	19235	3.25575	0.994292	0.227633	23.1356
GOTERM_BP_FAT	GO:0007155~cell adhesion	10	10.2041	0.0237205	TNFAIP6, SVEP1, S1PR1, COL6A3, PECAM1, SGCE, COL8A1, THBS1, THBS4, APC	82	700	13528	2.35679	1	0.639663	32.0205
GOTERM_BP_FAT	GO:0022610~biological adhesion	10	10.2041	0.023914	TNFAIP6, SVEP1, S1PR1, COL6A3, PECAM1, SGCE, COL8A1, THBS1, THBS4, APC	82	701	13528	2.35343	1	0.62931	32.2368
Annotation Cluster 15	Enrichment Score: 1.6894997223733212
Category	Term	Count	%	PValue	Genes	List Total	Pop Hits	Pop Total	Fold Enrichment	Bonferroni	Benjamini	FDR
GOTERM_BP_FAT	GO:0048545~response to steroid hormone stimulus	6	6.12245	0.00586308	SDC1, PPARG, FABP4, IGFBP2, THBS1, ADIPOQ	82	192	13528	5.15549	0.99883	0.430247	9.02099
GOTERM_BP_FAT	GO:0010035~response to inorganic substance	5	5.10204	0.0345047	SDC1, PRDX6, CYBRD1, IGFBP2, THBS1	82	205	13528	4.0238	1	0.705225	43.1382
GOTERM_BP_FAT	GO:0010038~response to metal ion	4	4.08163	0.042218	SDC1, CYBRD1, IGFBP2, THBS1	82	129	13528	5.11552	1	0.737723	50.0179
Annotation Cluster 16	Enrichment Score: 1.6179854255849129
Category	Term	Count	%	PValue	Genes	List Total	Pop Hits	Pop Total	Fold Enrichment	Bonferroni	Benjamini	FDR
UP_SEQ_FEATURE	short sequence motif:Cell attachment site	5	5.10204	0.00104916	SVEP1, COL6A3, IGFBP2, THBS1, THBS4	98	88	19113	11.0813	0.396442	0.118586	1.49215
SP_PIR_KEYWORDS	calcium binding	5	5.10204	0.00183469	THBS1, S100A1, RCN1, PROC, THBS4	98	103	19235	9.52794	0.375068	0.0330219	2.36609
UP_SEQ_FEATURE	domain:EGF-like 2; calcium-binding	4	4.08163	0.00304037	SVEP1, EGFL7, THBS1, THBS4	98	57	19113	13.6864	0.76884	0.216597	4.26731
UP_SEQ_FEATURE	domain:EGF-like 1	5	5.10204	0.00326736	SVEP1, EGFL7, THBS1, PROC, THBS4	98	120	19113	8.12628	0.792821	0.20139	4.57901
INTERPRO	IPR013320:Concanavalin A-like lectin/glucanase, subgroup	4	4.08163	0.00888052	SVEP1, LGALS3, THBS1, THBS4	93	77	16659	9.3054	0.905942	0.545224	11.0365
INTERPRO	IPR018097:EGF-like calcium-binding, conserved site	4	4.08163	0.0160954	SVEP1, EGFL7, PROC, THBS4	93	96	16659	7.46371	0.986431	0.576836	19.1623
INTERPRO	IPR000742:EGF-like, type 3	5	5.10204	0.022522	SVEP1, EGFL7, THBS1, PROC, THBS4	93	194	16659	4.61673	0.99761	0.634356	25.8173
INTERPRO	IPR006210:EGF-like	5	5.10204	0.0252433	SVEP1, EGFL7, THBS1, PROC, THBS4	93	201	16659	4.45595	0.998858	0.620124	28.4797
SP_PIR_KEYWORDS	egf-like domain	5	5.10204	0.0291176	SVEP1, EGFL7, THBS1, PROC, THBS4	98	230	19235	4.26686	0.999482	0.261099	31.9763
SMART	SM00181:EGF	5	5.10204	0.0391166	SVEP1, EGFL7, THBS1, PROC, THBS4	59	201	9079	3.82789	0.92221	0.573118	33.3269
SP_PIR_KEYWORDS	calcium	9	9.18367	0.0498226	SVEP1, EGFL7, GALNTL2, THBS1, S100A1, PPP2R3C, RCN1, PROC, THBS4	98	803	19235	2.19985	0.999998	0.344293	48.6446
INTERPRO	IPR013091:EGF calcium-binding	3	3.06122	0.0601164	SVEP1, EGFL7, THBS4	93	72	16659	7.46371	1	0.838868	55.639
INTERPRO	IPR013032:EGF-like region, conserved site	5	5.10204	0.0790664	SVEP1, EGFL7, THBS1, PROC, THBS4	93	293	16659	3.05681	1	0.837803	66.0348
GOTERM_MF_FAT	GO:0005509~calcium ion binding	10	10.2041	0.0930479	SVEP1, EGFL7, GALNTL2, SGCE, THBS1, S100A1, PPP2R3C, RCN1, PROC, THBS4	78	919	12983	1.81119	1	0.881592	72.5882
INTERPRO	IPR001881:EGF-like calcium-binding	3	3.06122	0.0986473	EGFL7, PROC, THBS4	93	96	16659	5.59778	1	0.879622	74.3746
INTERPRO	IPR000152:EGF-type aspartate/asparagine hydroxylation conserved site	3	3.06122	0.100376	SVEP1, EGFL7, PROC	93	97	16659	5.54007	1	0.864966	75.0114
SMART	SM00179:EGF_CA	3	3.06122	0.125179	EGFL7, PROC, THBS4	59	96	9079	4.80879	0.999808	0.759857	74.2988
INTERPRO	IPR006209:EGF	3	3.06122	0.155581	SVEP1, THBS1, PROC	93	127	16659	4.23139	1	0.949589	89.1063
Annotation Cluster 17	Enrichment Score: 1.5459535930846744
Category	Term	Count	%	PValue	Genes	List Total	Pop Hits	Pop Total	Fold Enrichment	Bonferroni	Benjamini	FDR
GOTERM_BP_FAT	GO:0006631~fatty acid metabolic process	7	7.14286	0.00118954	GGT5, LIPA, SCD, FASN, FABP4, ADIPOQ, CD74	82	198	13528	5.83247	0.744977	0.203664	1.89543
GOTERM_BP_FAT	GO:0006633~fatty acid biosynthetic process	4	4.08163	0.0117998	GGT5, SCD, FASN, CD74	82	79	13528	8.3532	0.999999	0.51188	17.3735
GOTERM_BP_FAT	GO:0046394~carboxylic acid biosynthetic process	4	4.08163	0.0659521	GGT5, SCD, FASN, CD74	82	155	13528	4.25744	1	0.765539	66.6106
GOTERM_BP_FAT	GO:0016053~organic acid biosynthetic process	4	4.08163	0.0659521	GGT5, SCD, FASN, CD74	82	155	13528	4.25744	1	0.765539	66.6106
GOTERM_BP_FAT	GO:0008610~lipid biosynthetic process	4	4.08163	0.305158	GGT5, SCD, FASN, CD74	82	323	13528	2.04304	1	0.974428	99.713
Annotation Cluster 18	Enrichment Score: 1.4947564401111704
Category	Term	Count	%	PValue	Genes	List Total	Pop Hits	Pop Total	Fold Enrichment	Bonferroni	Benjamini	FDR
SP_PIR_KEYWORDS	lysosome	5	5.10204	0.00686595	CTSK, LIPA, PRDX6, IFI30, CD74	98	149	19235	6.58643	0.828598	0.110933	8.59196
GOTERM_CC_FAT	GO:0000323~lytic vacuole	5	5.10204	0.0448919	CTSK, LIPA, PRDX6, IFI30, CD74	82	211	12782	3.69379	0.999859	0.522275	43.5793
GOTERM_CC_FAT	GO:0005764~lysosome	5	5.10204	0.0448919	CTSK, LIPA, PRDX6, IFI30, CD74	82	211	12782	3.69379	0.999859	0.522275	43.5793
GOTERM_CC_FAT	GO:0005773~vacuole	5	5.10204	0.0758468	CTSK, LIPA, PRDX6, IFI30, CD74	82	252	12782	3.09282	1	0.570761	62.5767
Annotation Cluster 19	Enrichment Score: 1.4669170728397962
Category	Term	Count	%	PValue	Genes	List Total	Pop Hits	Pop Total	Fold Enrichment	Bonferroni	Benjamini	FDR
GOTERM_BP_FAT	GO:0042493~response to drug	8	8.16327	0.000306786	PPARG, TLR2, FABP4, UQCRFS1, IGFBP2, ADIPOQ, MGST1, APC	82	216	13528	6.11021	0.296892	0.110784	0.492098
GOTERM_BP_FAT	GO:0048545~response to steroid hormone stimulus	6	6.12245	0.00586308	SDC1, PPARG, FABP4, IGFBP2, THBS1, ADIPOQ	82	192	13528	5.15549	0.99883	0.430247	9.02099
GOTERM_BP_FAT	GO:0007584~response to nutrient	3	3.06122	0.204523	PPARG, IGFBP2, ADIPOQ	82	140	13528	3.53519	1	0.935185	97.4746
GOTERM_BP_FAT	GO:0031667~response to nutrient levels	3	3.06122	0.330625	PPARG, IGFBP2, ADIPOQ	82	197	13528	2.51232	1	0.97851	99.8425
GOTERM_BP_FAT	GO:0009991~response to extracellular stimulus	3	3.06122	0.380519	PPARG, IGFBP2, ADIPOQ	82	220	13528	2.24967	1	0.98543	99.9547
Annotation Cluster 20	Enrichment Score: 1.4656833513045493
Category	Term	Count	%	PValue	Genes	List Total	Pop Hits	Pop Total	Fold Enrichment	Bonferroni	Benjamini	FDR
GOTERM_CC_FAT	GO:0031012~extracellular matrix	7	7.14286	0.0220851	LGALS3, CRISPLD2, COL6A3, COL1A2, COL8A1, THBS1, THBS4	82	345	12782	3.16274	0.986569	0.350154	24.2917
GOTERM_BP_FAT	GO:0030198~extracellular matrix organization	4	4.08163	0.0244394	LGALS3, P4HA1, CRISPLD2, COL1A2	82	104	13528	6.34522	1	0.624494	32.8208
GOTERM_BP_FAT	GO:0043062~extracellular structure organization	4	4.08163	0.0742608	LGALS3, P4HA1, CRISPLD2, COL1A2	82	163	13528	4.04848	1	0.788617	71.0786
Annotation Cluster 21	Enrichment Score: 1.4462143654186181
Category	Term	Count	%	PValue	Genes	List Total	Pop Hits	Pop Total	Fold Enrichment	Bonferroni	Benjamini	FDR
GOTERM_BP_FAT	GO:0006954~inflammatory response	8	8.16327	0.00329133	TNFAIP6, LIPA, LY96, TLR2, C4BPA, THBS1, C1QC, CD163	82	325	13528	4.06094	0.977284	0.31509	5.16236
GOTERM_BP_FAT	GO:0009611~response to wounding	10	10.2041	0.00431973	TNFAIP6, SDC1, LIPA, LY96, TLR2, C4BPA, THBS1, C1QC, PROC, CD163	82	530	13528	3.11275	0.993055	0.363518	6.72341
GOTERM_BP_FAT	GO:0006952~defense response	10	10.2041	0.0110491	TNFAIP6, LIPA, LY96, PPARG, TLR2, C4BPA, THBS1, C1QC, CD74, CD163	82	615	13528	2.68253	0.999997	0.527771	16.3586
GOTERM_BP_FAT	GO:0048584~positive regulation of response to stimulus	6	6.12245	0.0135653	S1PR1, TLR2, FABP4, C4BPA, THBS1, C1QC	82	236	13528	4.1943	1	0.543414	19.7152
SP_PIR_KEYWORDS	immune response	5	5.10204	0.0267744	LY96, TLR2, C4BPA, C1QC, CD74	98	224	19235	4.38115	0.999039	0.260716	29.8042
GOTERM_BP_FAT	GO:0045087~innate immune response	4	4.08163	0.0498483	PPARG, TLR2, C4BPA, C1QC	82	138	13528	4.7819	1	0.769507	56.0494
GOTERM_BP_FAT	GO:0006955~immune response	9	9.18367	0.0539113	CCL14, LY96, PPARG, TLR2, C4BPA, THBS1, C1QC, FCGR3B, CD74	82	690	13528	2.15186	1	0.764473	58.9755
GOTERM_BP_FAT	GO:0002684~positive regulation of immune system process	5	5.10204	0.0544193	TLR2, C4BPA, THBS1, C1QC, CD74	82	238	13528	3.46587	1	0.760092	59.3282
SP_PIR_KEYWORDS	innate immunity	3	3.06122	0.0590381	TLR2, C4BPA, C1QC	98	78	19235	7.54906	1	0.359236	54.7733
GOTERM_BP_FAT	GO:0002253~activation of immune response	3	3.06122	0.1089	TLR2, C4BPA, C1QC	82	94	13528	5.26518	1	0.849063	84.3346
GOTERM_BP_FAT	GO:0050778~positive regulation of immune response	3	3.06122	0.215483	TLR2, C4BPA, C1QC	82	145	13528	3.41329	1	0.941744	97.9795
GOTERM_BP_FAT	GO:0007243~protein kinase cascade	4	4.08163	0.382357	LY96, TLR2, THBS1, CD74	82	370	13528	1.78352	1	0.985339	99.9568
Annotation Cluster 22	Enrichment Score: 1.3031924547116587
Category	Term	Count	%	PValue	Genes	List Total	Pop Hits	Pop Total	Fold Enrichment	Bonferroni	Benjamini	FDR
GOTERM_MF_FAT	GO:0008289~lipid binding	8	8.16327	0.0171429	ALDH1A1, SNX9, S1PR1, PPARG, SNX2, FABP4, ABCA1, TENC1	78	450	12983	2.95909	0.992633	0.388035	20.4779
GOTERM_BP_FAT	GO:0055088~lipid homeostasis	3	3.06122	0.0373688	PPARG, FABP4, ABCA1	82	51	13528	9.70445	1	0.723605	45.7903
GOTERM_BP_FAT	GO:0048878~chemical homeostasis	6	6.12245	0.192234	CCL14, S1PR1, PPARG, FABP4, ABCA1, ADIPOQ	82	512	13528	1.93331	1	0.92626	96.7687
Annotation Cluster 23	Enrichment Score: 1.296299292743388
Category	Term	Count	%	PValue	Genes	List Total	Pop Hits	Pop Total	Fold Enrichment	Bonferroni	Benjamini	FDR
GOTERM_BP_FAT	GO:0060249~anatomical structure homeostasis	4	4.08163	0.0256731	CTSK, LIPA, FH, APC	82	106	13528	6.22549	1	0.618312	34.1738
GOTERM_BP_FAT	GO:0001894~tissue homeostasis	3	3.06122	0.0546845	CTSK, LIPA, FH	82	63	13528	7.85598	1	0.754257	59.5113
GOTERM_BP_FAT	GO:0048871~multicellular organismal homeostasis	3	3.06122	0.0919939	CTSK, LIPA, FH	82	85	13528	5.82267	1	0.8229	78.8081
Annotation Cluster 24	Enrichment Score: 1.2371895987077721
Category	Term	Count	%	PValue	Genes	List Total	Pop Hits	Pop Total	Fold Enrichment	Bonferroni	Benjamini	FDR
SP_PIR_KEYWORDS	heme	4	4.08163	0.0233383	CYP27A1, CYCS, CYBRD1, HBA2, HBA1	98	121	19235	6.48845	0.997631	0.250147	26.503
SP_PIR_KEYWORDS	metalloprotein	4	4.08163	0.0248647	CYP27A1, P4HA1, CYCS, HBA2, HBA1	98	124	19235	6.33147	0.998413	0.253972	27.9867
SP_PIR_KEYWORDS	chromoprotein	3	3.06122	0.0391373	CYP27A1, CYCS, HBA2, HBA1	98	62	19235	9.4972	0.999964	0.325036	40.5826
GOTERM_MF_FAT	GO:0020037~heme binding	3	3.06122	0.161182	CYP27A1, CYCS, HBA2, HBA1	78	121	12983	4.12683	1	0.946936	90.2614
GOTERM_MF_FAT	GO:0046906~tetrapyrrole binding	3	3.06122	0.178029	CYP27A1, CYCS, HBA2, HBA1	78	129	12983	3.8709	1	0.946626	92.5571
Annotation Cluster 25	Enrichment Score: 1.2046666887899666
Category	Term	Count	%	PValue	Genes	List Total	Pop Hits	Pop Total	Fold Enrichment	Bonferroni	Benjamini	FDR
SP_PIR_KEYWORDS	LIM domain	3	3.06122	0.0499634	CRIP1, LMO2, CRIP2	98	71	19235	8.29333	0.999998	0.336375	48.7437
INTERPRO	IPR001781:Zinc finger, LIM-type	3	3.06122	0.0615938	CRIP1, LMO2, CRIP2	93	73	16659	7.36147	1	0.814494	56.5445
SMART	SM00132:LIM	3	3.06122	0.0790335	CRIP1, LMO2, CRIP2	59	73	9079	6.32389	0.994852	0.732144	56.6737
Annotation Cluster 26	Enrichment Score: 1.1909723456562176
Category	Term	Count	%	PValue	Genes	List Total	Pop Hits	Pop Total	Fold Enrichment	Bonferroni	Benjamini	FDR
SP_PIR_KEYWORDS	immune response	5	5.10204	0.0267744	LY96, TLR2, C4BPA, C1QC, CD74	98	224	19235	4.38115	0.999039	0.260716	29.8042
GOTERM_BP_FAT	GO:0016064~immunoglobulin mediated immune response	3	3.06122	0.0414637	C4BPA, C1QC, CD74	82	54	13528	9.16531	1	0.74087	49.3814
GOTERM_BP_FAT	GO:0019724~B cell mediated immunity	3	3.06122	0.0442833	C4BPA, C1QC, CD74	82	56	13528	8.83798	1	0.745473	51.7229
GOTERM_BP_FAT	GO:0002684~positive regulation of immune system process	5	5.10204	0.0544193	TLR2, C4BPA, THBS1, C1QC, CD74	82	238	13528	3.46587	1	0.760092	59.3282
GOTERM_BP_FAT	GO:0002449~lymphocyte mediated immunity	3	3.06122	0.0658507	C4BPA, C1QC, CD74	82	70	13528	7.07038	1	0.771332	66.5523
GOTERM_BP_FAT	GO:0002460~adaptive immune response based on somatic recombination of immune receptors built from immunoglobulin superfamily domains	3	3.06122	0.0777029	C4BPA, C1QC, CD74	82	77	13528	6.42762	1	0.787254	72.7599
GOTERM_BP_FAT	GO:0002250~adaptive immune response	3	3.06122	0.0777029	C4BPA, C1QC, CD74	82	77	13528	6.42762	1	0.787254	72.7599
GOTERM_BP_FAT	GO:0002443~leukocyte mediated immunity	3	3.06122	0.0938313	C4BPA, C1QC, CD74	82	86	13528	5.75496	1	0.824512	79.4871
GOTERM_BP_FAT	GO:0002252~immune effector process	3	3.06122	0.191463	C4BPA, C1QC, CD74	82	134	13528	3.69348	1	0.927449	96.7187
Annotation Cluster 27	Enrichment Score: 1.1619703489359747
Category	Term	Count	%	PValue	Genes	List Total	Pop Hits	Pop Total	Fold Enrichment	Bonferroni	Benjamini	FDR
GOTERM_BP_FAT	GO:0032101~regulation of response to external stimulus	6	6.12245	0.00263101	S1PR1, PPARG, FABP4, THBS1, ADIPOQ, PROC	82	159	13528	6.22549	0.951412	0.285407	4.14714
KEGG_PATHWAY	hsa03320:PPAR signaling pathway	5	5.10204	0.00385534	CYP27A1, SCD, PPARG, FABP4, ADIPOQ	49	69	5085	7.51996	0.21903	0.21903	3.84822
GOTERM_BP_FAT	GO:0048545~response to steroid hormone stimulus	6	6.12245	0.00586308	SDC1, PPARG, FABP4, IGFBP2, THBS1, ADIPOQ	82	192	13528	5.15549	0.99883	0.430247	9.02099
GOTERM_BP_FAT	GO:0050873~brown fat cell differentiation	3	3.06122	0.00897315	PPARG, FABP4, ADIPOQ	82	24	13528	20.622	0.999968	0.522466	13.4906
GOTERM_BP_FAT	GO:0001818~negative regulation of cytokine production	3	3.06122	0.0216555	PPARG, THBS1, ADIPOQ	82	38	13528	13.0244	1	0.619656	29.6715
GOTERM_BP_FAT	GO:0045444~fat cell differentiation	3	3.06122	0.0400806	PPARG, FABP4, ADIPOQ	82	53	13528	9.33824	1	0.738603	48.1941
GOTERM_BP_FAT	GO:0051241~negative regulation of multicellular organismal process	4	4.08163	0.075331	PPARG, THBS1, ADIPOQ, PROC	82	164	13528	4.0238	1	0.787791	71.6115
GOTERM_BP_FAT	GO:0050727~regulation of inflammatory response	3	3.06122	0.0759706	PPARG, FABP4, ADIPOQ	82	76	13528	6.5122	1	0.785055	71.9255
GOTERM_BP_FAT	GO:0001817~regulation of cytokine production	4	4.08163	0.0945462	PPARG, TLR2, THBS1, ADIPOQ	82	181	13528	3.64587	1	0.82228	79.7458
GOTERM_BP_FAT	GO:0048878~chemical homeostasis	6	6.12245	0.192234	CCL14, S1PR1, PPARG, FABP4, ABCA1, ADIPOQ	82	512	13528	1.93331	1	0.92626	96.7687
GOTERM_BP_FAT	GO:0010605~negative regulation of macromolecule metabolic process	7	7.14286	0.275949	PPARG, FABP4, ZEB2, THBS1, ADIPOQ, S100A1, RPS27A	82	734	13528	1.57334	1	0.965605	99.4435
GOTERM_MF_FAT	GO:0046983~protein dimerization activity	5	5.10204	0.401822	PPARG, PLVAP, ADIPOQ, S100A1, MGST1	78	542	12983	1.5355	1	0.993477	99.8897
GOTERM_BP_FAT	GO:0010558~negative regulation of macromolecule biosynthetic process	5	5.10204	0.415579	PPARG, FABP4, ZEB2, ADIPOQ, S100A1	82	547	13528	1.508	1	0.988159	99.9822
GOTERM_BP_FAT	GO:0031327~negative regulation of cellular biosynthetic process	5	5.10204	0.434537	PPARG, FABP4, ZEB2, ADIPOQ, S100A1	82	561	13528	1.47037	1	0.988698	99.9895
GOTERM_BP_FAT	GO:0009890~negative regulation of biosynthetic process	5	5.10204	0.450663	PPARG, FABP4, ZEB2, ADIPOQ, S100A1	82	573	13528	1.43958	1	0.989793	99.9934
GOTERM_BP_FAT	GO:0010604~positive regulation of macromolecule metabolic process	6	6.12245	0.589152	S1PR1, PPARG, THBS1, ADIPOQ, RPS27A, APC	82	857	13528	1.15502	1	0.997708	99.9999
Annotation Cluster 28	Enrichment Score: 1.1429313862325572
Category	Term	Count	%	PValue	Genes	List Total	Pop Hits	Pop Total	Fold Enrichment	Bonferroni	Benjamini	FDR
GOTERM_BP_FAT	GO:0045596~negative regulation of cell differentiation	7	7.14286	0.00185353	LMO2, PPARG, ABCA1, C1QC, ADIPOQ, CD74, APC	82	216	13528	5.34643	0.881143	0.262332	2.93875
GOTERM_BP_FAT	GO:0030097~hemopoiesis	5	5.10204	0.0530662	LMO2, CRIP2, PPARG, CD74, APC	82	236	13528	3.49525	1	0.774713	58.3824
GOTERM_BP_FAT	GO:0048534~hemopoietic or lymphoid organ development	5	5.10204	0.0705292	LMO2, CRIP2, PPARG, CD74, APC	82	260	13528	3.17261	1	0.782733	69.1462
GOTERM_BP_FAT	GO:0051338~regulation of transferase activity	6	6.12245	0.0721608	PPARG, FABP4, ZEB2, THBS1, CD74, APC	82	372	13528	2.6609	1	0.784627	70.0055
GOTERM_BP_FAT	GO:0002520~immune system development	5	5.10204	0.0836259	LMO2, CRIP2, PPARG, CD74, APC	82	276	13528	2.98869	1	0.801512	75.4403
GOTERM_BP_FAT	GO:0002521~leukocyte differentiation	3	3.06122	0.184977	PPARG, CD74, APC	82	131	13528	3.77807	1	0.922097	96.269
GOTERM_BP_FAT	GO:0051094~positive regulation of developmental process	4	4.08163	0.232236	PPARG, THBS1, CD74, APC	82	278	13528	2.37375	1	0.950402	98.5719
GOTERM_BP_FAT	GO:0045597~positive regulation of cell differentiation	3	3.06122	0.399643	PPARG, CD74, APC	82	229	13528	2.16125	1	0.986525	99.9726
Annotation Cluster 29	Enrichment Score: 1.1154179225660852
Category	Term	Count	%	PValue	Genes	List Total	Pop Hits	Pop Total	Fold Enrichment	Bonferroni	Benjamini	FDR
SP_PIR_KEYWORDS	cell adhesion	7	7.14286	0.0199771	TNFAIP6, SVEP1, COL6A3, PECAM1, COL8A1, THBS1, THBS4	98	422	19235	3.25575	0.994292	0.227633	23.1356
GOTERM_CC_FAT	GO:0031091~platelet alpha granule	3	3.06122	0.0490107	PECAM1, THBS1, THBS4	82	56	12782	8.35061	0.999939	0.49981	46.5374
GOTERM_CC_FAT	GO:0030141~secretory granule	4	4.08163	0.106054	PAM, PECAM1, THBS1, THBS4	82	180	12782	3.46396	1	0.626005	75.2659
GOTERM_CC_FAT	GO:0044433~cytoplasmic vesicle part	3	3.06122	0.332641	PECAM1, THBS1, THBS4	82	187	12782	2.50072	1	0.91277	99.3523
Annotation Cluster 30	Enrichment Score: 1.040914349269954
Category	Term	Count	%	PValue	Genes	List Total	Pop Hits	Pop Total	Fold Enrichment	Bonferroni	Benjamini	FDR
GOTERM_BP_FAT	GO:0030155~regulation of cell adhesion	5	5.10204	0.00917881	S1PR1, COL8A1, THBS1, ADIPOQ, APC	82	137	13528	6.02101	0.999975	0.506251	13.7788
GOTERM_BP_FAT	GO:0051129~negative regulation of cellular component organization	4	4.08163	0.0534417	S1PR1, THBS1, ADIPOQ, APC	82	142	13528	4.6472	1	0.769224	58.6469
GOTERM_BP_FAT	GO:0044087~regulation of cellular component biogenesis	4	4.08163	0.0534417	S1PR1, THBS1, RPS27A, APC	82	142	13528	4.6472	1	0.769224	58.6469
GOTERM_BP_FAT	GO:0030334~regulation of cell migration	4	4.08163	0.0807843	S1PR1, EGFL7, THBS1, APC	82	169	13528	3.90475	1	0.795106	74.1868
GOTERM_BP_FAT	GO:0030335~positive regulation of cell migration	3	3.06122	0.0994069	S1PR1, THBS1, APC	82	89	13528	5.56098	1	0.833705	81.4249
GOTERM_BP_FAT	GO:0040012~regulation of locomotion	4	4.08163	0.10795	S1PR1, EGFL7, THBS1, APC	82	192	13528	3.43699	1	0.850517	84.0639
GOTERM_BP_FAT	GO:0051270~regulation of cell motion	4	4.08163	0.109204	S1PR1, EGFL7, THBS1, APC	82	193	13528	3.41918	1	0.845842	84.4203
GOTERM_BP_FAT	GO:0040017~positive regulation of locomotion	3	3.06122	0.116661	S1PR1, THBS1, APC	82	98	13528	5.05027	1	0.850242	86.3899
GOTERM_BP_FAT	GO:0051272~positive regulation of cell motion	3	3.06122	0.116661	S1PR1, THBS1, APC	82	98	13528	5.05027	1	0.850242	86.3899
GOTERM_BP_FAT	GO:0051247~positive regulation of protein metabolic process	4	4.08163	0.178285	THBS1, ADIPOQ, RPS27A, APC	82	243	13528	2.71565	1	0.91602	95.7447
GOTERM_BP_FAT	GO:0010604~positive regulation of macromolecule metabolic process	6	6.12245	0.589152	S1PR1, PPARG, THBS1, ADIPOQ, RPS27A, APC	82	857	13528	1.15502	1	0.997708	99.9999
Annotation Cluster 31	Enrichment Score: 1.0245966616942097
Category	Term	Count	%	PValue	Genes	List Total	Pop Hits	Pop Total	Fold Enrichment	Bonferroni	Benjamini	FDR
SP_PIR_KEYWORDS	endoplasmic reticulum	9	9.18367	0.0275772	MAGT1, RDH10, P4HA1, SCD, P4HA3, CD74, MGST1, RCN1, RTN3	98	713	19235	2.47753	0.999222	0.257913	30.5555
GOTERM_CC_FAT	GO:0005783~endoplasmic reticulum	11	11.2245	0.0809673	MAGT1, RDH10, P4HA1, SCD, P4HA3, ADIPOQ, S100A1, CD74, MGST1, RCN1, RTN3	82	960	12782	1.7861	1	0.57585	65.08
GOTERM_CC_FAT	GO:0044432~endoplasmic reticulum part	4	4.08163	0.377877	MAGT1, P4HA1, P4HA3, RCN1	82	347	12782	1.79687	1	0.9324	99.7299
Annotation Cluster 32	Enrichment Score: 0.9495369570921918
Category	Term	Count	%	PValue	Genes	List Total	Pop Hits	Pop Total	Fold Enrichment	Bonferroni	Benjamini	FDR
SP_PIR_KEYWORDS	plasma	4	4.08163	0.0116285	SEPP1, C4BPA, C1QC, PROC	98	93	19235	8.44196	0.94993	0.153252	14.1456
KEGG_PATHWAY	hsa04610:Complement and coagulation cascades	3	3.06122	0.137666	C4BPA, C1QC, PROC	49	69	5085	4.51198	0.999924	0.849808	77.7911
GOTERM_BP_FAT	GO:0006508~proteolysis	5	5.10204	0.885195	CTSK, C4BPA, C1QC, RPS27A, PROC	82	1054	13528	0.782617	1	0.999997	100
Annotation Cluster 33	Enrichment Score: 0.9342859632977605
Category	Term	Count	%	PValue	Genes	List Total	Pop Hits	Pop Total	Fold Enrichment	Bonferroni	Benjamini	FDR
GOTERM_BP_FAT	GO:0001568~blood vessel development	5	5.10204	0.0593024	S1PR1, LMO2, EGFL7, COL1A2, THBS1	82	245	13528	3.36685	1	0.768253	62.5767
GOTERM_BP_FAT	GO:0001944~vasculature development	5	5.10204	0.063669	S1PR1, LMO2, EGFL7, COL1A2, THBS1	82	251	13528	3.28637	1	0.77919	65.274
GOTERM_BP_FAT	GO:0030334~regulation of cell migration	4	4.08163	0.0807843	S1PR1, EGFL7, THBS1, APC	82	169	13528	3.90475	1	0.795106	74.1868
GOTERM_BP_FAT	GO:0040012~regulation of locomotion	4	4.08163	0.10795	S1PR1, EGFL7, THBS1, APC	82	192	13528	3.43699	1	0.850517	84.0639
GOTERM_BP_FAT	GO:0051270~regulation of cell motion	4	4.08163	0.109204	S1PR1, EGFL7, THBS1, APC	82	193	13528	3.41918	1	0.845842	84.4203
GOTERM_BP_FAT	GO:0001525~angiogenesis	3	3.06122	0.222086	S1PR1, EGFL7, THBS1	82	148	13528	3.3441	1	0.945644	98.2362
GOTERM_BP_FAT	GO:0048514~blood vessel morphogenesis	3	3.06122	0.361153	S1PR1, EGFL7, THBS1	82	211	13528	2.34562	1	0.983136	99.9257
Annotation Cluster 34	Enrichment Score: 0.9323265971742524
Category	Term	Count	%	PValue	Genes	List Total	Pop Hits	Pop Total	Fold Enrichment	Bonferroni	Benjamini	FDR
SP_PIR_KEYWORDS	electron transport	3	3.06122	0.0907254	CYCS, CYBRD1, UQCRFS1	98	100	19235	5.88827	1	0.491518	71.0661
GOTERM_BP_FAT	GO:0006091~generation of precursor metabolites and energy	5	5.10204	0.118087	CYCS, CYBRD1, UQCRFS1, ADIPOQ, FH	82	313	13528	2.63539	1	0.850155	86.7388
GOTERM_BP_FAT	GO:0022900~electron transport chain	3	3.06122	0.148967	CYCS, CYBRD1, UQCRFS1	82	114	13528	4.34146	1	0.892585	92.5233
Annotation Cluster 35	Enrichment Score: 0.8255245910957578
Category	Term	Count	%	PValue	Genes	List Total	Pop Hits	Pop Total	Fold Enrichment	Bonferroni	Benjamini	FDR
UP_SEQ_FEATURE	repeat:LRR 13	3	3.06122	0.057026	COL6A3, TLR2, LRRC70	98	76	19113	7.69858	1	0.940648	56.8693
UP_SEQ_FEATURE	repeat:LRR 12	3	3.06122	0.0780804	COL6A3, TLR2, LRRC70	98	91	19113	6.42958	1	0.971416	68.787
UP_SEQ_FEATURE	repeat:LRR 11	3	3.06122	0.0948216	COL6A3, TLR2, LRRC70	98	102	19113	5.73619	1	0.974929	75.9924
UP_SEQ_FEATURE	repeat:LRR 5	4	4.08163	0.113039	COL6A3, TLR2, LRRC70, KIAA1239	98	231	19113	3.37715	1	0.983776	82.0572
UP_SEQ_FEATURE	repeat:LRR 10	3	3.06122	0.119102	COL6A3, TLR2, LRRC70	98	117	19113	5.00078	1	0.982862	83.736
UP_SEQ_FEATURE	repeat:LRR 4	4	4.08163	0.136537	COL6A3, TLR2, LRRC70, KIAA1239	98	252	19113	3.09572	1	0.987885	87.7853
UP_SEQ_FEATURE	repeat:LRR 9	3	3.06122	0.149982	COL6A3, TLR2, LRRC70	98	135	19113	4.33401	1	0.989925	90.244
UP_SEQ_FEATURE	repeat:LRR 8	3	3.06122	0.174982	COL6A3, TLR2, LRRC70	98	149	19113	3.92679	1	0.994142	93.638
UP_SEQ_FEATURE	repeat:LRR 3	4	4.08163	0.194252	COL6A3, TLR2, LRRC70, KIAA1239	98	299	19113	2.60911	1	0.99578	95.4649
UP_SEQ_FEATURE	repeat:LRR 1	4	4.08163	0.219114	COL6A3, TLR2, LRRC70, KIAA1239	98	318	19113	2.45322	1	0.997389	97.105
UP_SEQ_FEATURE	repeat:LRR 2	4	4.08163	0.220441	COL6A3, TLR2, LRRC70, KIAA1239	98	319	19113	2.44552	1	0.996667	97.1747
SP_PIR_KEYWORDS	leucine-rich repeat	4	4.08163	0.221716	COL6A3, TLR2, LRRC70, KIAA1239	98	322	19235	2.43821	1	0.77515	96.1937
UP_SEQ_FEATURE	repeat:LRR 7	3	3.06122	0.226611	COL6A3, TLR2, LRRC70	98	177	19113	3.3056	1	0.995365	97.4786
UP_SEQ_FEATURE	repeat:LRR 6	3	3.06122	0.288599	COL6A3, TLR2, LRRC70	98	210	19113	2.78615	1	0.998572	99.2379
Annotation Cluster 36	Enrichment Score: 0.7983464754491442
Category	Term	Count	%	PValue	Genes	List Total	Pop Hits	Pop Total	Fold Enrichment	Bonferroni	Benjamini	FDR
GOTERM_BP_FAT	GO:0002684~positive regulation of immune system process	5	5.10204	0.0544193	TLR2, C4BPA, THBS1, C1QC, CD74	82	238	13528	3.46587	1	0.760092	59.3282
GOTERM_CC_FAT	GO:0009897~external side of plasma membrane	4	4.08163	0.0932394	S1PR1, TLR2, THBS1, CD74	82	170	12782	3.66772	1	0.593241	70.4659
GOTERM_BP_FAT	GO:0044093~positive regulation of molecular function	7	7.14286	0.138495	S1PR1, CYCS, TLR2, ZEB2, THBS1, CD74, RPS27A	82	586	13528	1.9707	1	0.882253	90.8987
GOTERM_CC_FAT	GO:0009986~cell surface	5	5.10204	0.178979	SDC1, S1PR1, TLR2, THBS1, CD74	82	348	12782	2.23963	1	0.768664	91.4339
GOTERM_BP_FAT	GO:0007242~intracellular signaling cascade	10	10.2041	0.337181	S1PR1, LY96, COL1A2, TLR2, GNG11, ABCA1, THBS1, TENC1, S100A1, CD74	82	1256	13528	1.3135	1	0.979138	99.8656
GOTERM_BP_FAT	GO:0007243~protein kinase cascade	4	4.08163	0.382357	LY96, TLR2, THBS1, CD74	82	370	13528	1.78352	1	0.985339	99.9568
Annotation Cluster 37	Enrichment Score: 0.7730456733210999
Category	Term	Count	%	PValue	Genes	List Total	Pop Hits	Pop Total	Fold Enrichment	Bonferroni	Benjamini	FDR
GOTERM_CC_FAT	GO:0022626~cytosolic ribosome	4	4.08163	0.0146776	RPLP1, FAU, HBA2, HBA1, RPS27A	82	81	12782	7.69768	0.942373	0.300032	16.8272
GOTERM_CC_FAT	GO:0022627~cytosolic small ribosomal subunit	3	3.06122	0.0264816	FAU, HBA2, HBA1, RPS27A	82	40	12782	11.6909	0.994371	0.375556	28.4254
GOTERM_CC_FAT	GO:0033279~ribosomal subunit	4	4.08163	0.0476091	RPLP1, FAU, HBA2, HBA1, RPS27A	82	128	12782	4.87119	0.999918	0.515284	45.5472
SP_PIR_KEYWORDS	ribosome	3	3.06122	0.0525004	RPLP1, FAU, RPS27A	98	73	19235	8.06612	0.999999	0.341872	50.5001
GOTERM_CC_FAT	GO:0015935~small ribosomal subunit	3	3.06122	0.0604308	FAU, HBA2, HBA1, RPS27A	82	63	12782	7.42276	0.999994	0.551582	54.0093
GOTERM_CC_FAT	GO:0044445~cytosolic part	4	4.08163	0.0719733	RPLP1, FAU, HBA2, HBA1, RPS27A	82	152	12782	4.10205	0.999999	0.571732	60.5745
GOTERM_BP_FAT	GO:0006414~translational elongation	3	3.06122	0.122572	RPLP1, FAU, RPS27A	82	101	13528	4.90027	1	0.854055	87.7826
GOTERM_CC_FAT	GO:0005840~ribosome	4	4.08163	0.155711	RPLP1, FAU, HBA2, HBA1, RPS27A	82	215	12782	2.90006	1	0.74363	87.8655
KEGG_PATHWAY	hsa03010:Ribosome	3	3.06122	0.19795	RPLP1, FAU, RPS27A	49	87	5085	3.57847	0.999999	0.904906	89.3639
SP_PIR_KEYWORDS	ribosomal protein	3	3.06122	0.244988	RPLP1, FAU, RPS27A	98	188	19235	3.13206	1	0.805054	97.4379
SP_PIR_KEYWORDS	protein biosynthesis	3	3.06122	0.244988	RPLP1, FAU, RPS27A	98	188	19235	3.13206	1	0.805054	97.4379
GOTERM_MF_FAT	GO:0003735~structural constituent of ribosome	3	3.06122	0.262876	RPLP1, FAU, RPS27A	78	168	12983	2.9723	1	0.972925	98.2431
GOTERM_MF_FAT	GO:0005198~structural molecule activity	6	6.12245	0.323026	RPLP1, COL1A2, FAU, THBS1, RPS27A, THBS4	78	634	12983	1.57522	1	0.980879	99.4313
SP_PIR_KEYWORDS	ribonucleoprotein	3	3.06122	0.411938	RPLP1, FAU, RPS27A	98	279	19235	2.11049	1	0.911705	99.9015
GOTERM_BP_FAT	GO:0006412~translation	3	3.06122	0.593187	RPLP1, FAU, RPS27A	82	331	13528	1.49525	1	0.997697	99.9999
GOTERM_CC_FAT	GO:0030529~ribonucleoprotein complex	4	4.08163	0.639308	RPLP1, FAU, HBA2, HBA1, RPS27A	82	515	12782	1.2107	1	0.984814	99.9997
GOTERM_CC_FAT	GO:0043232~intracellular non-membrane-bounded organelle	11	11.2245	0.978387	INTS6, RPLP1, H3F3A, FAU, HBA2, SGCE, H3F3C, HBA1, C1QC, RPS27A, APC, RTN3	82	2596	12782	0.6605	1	0.999987	100
GOTERM_CC_FAT	GO:0043228~non-membrane-bounded organelle	11	11.2245	0.978387	INTS6, RPLP1, H3F3A, FAU, HBA2, SGCE, H3F3C, HBA1, C1QC, RPS27A, APC, RTN3	82	2596	12782	0.6605	1	0.999987	100
Annotation Cluster 38	Enrichment Score: 0.7356429281787438
Category	Term	Count	%	PValue	Genes	List Total	Pop Hits	Pop Total	Fold Enrichment	Bonferroni	Benjamini	FDR
GOTERM_BP_FAT	GO:0044087~regulation of cellular component biogenesis	4	4.08163	0.0534417	S1PR1, THBS1, RPS27A, APC	82	142	13528	4.6472	1	0.769224	58.6469
GOTERM_BP_FAT	GO:0043066~negative regulation of apoptosis	6	6.12245	0.0610003	BTG2, THBS1, CD74, RPS27A, PROC, APC	82	354	13528	2.7962	1	0.771129	63.6481
GOTERM_BP_FAT	GO:0043069~negative regulation of programmed cell death	6	6.12245	0.0639938	BTG2, THBS1, CD74, RPS27A, PROC, APC	82	359	13528	2.75725	1	0.774322	65.4672
GOTERM_BP_FAT	GO:0060548~negative regulation of cell death	6	6.12245	0.0646023	BTG2, THBS1, CD74, RPS27A, PROC, APC	82	360	13528	2.74959	1	0.771078	65.8264
GOTERM_BP_FAT	GO:0051247~positive regulation of protein metabolic process	4	4.08163	0.178285	THBS1, ADIPOQ, RPS27A, APC	82	243	13528	2.71565	1	0.91602	95.7447
GOTERM_BP_FAT	GO:0033554~cellular response to stress	4	4.08163	0.664678	BTG2, PRDX6, THBS1, APC	82	566	13528	1.16591	1	0.999164	100
GOTERM_BP_FAT	GO:0022402~cell cycle process	3	3.06122	0.857797	THBS1, RPS27A, APC	82	565	13528	0.875977	1	0.999992	100
GOTERM_BP_FAT	GO:0007049~cell cycle	3	3.06122	0.950929	THBS1, RPS27A, APC	82	776	13528	0.637792	1	1	100
Annotation Cluster 39	Enrichment Score: 0.7351257188194636
Category	Term	Count	%	PValue	Genes	List Total	Pop Hits	Pop Total	Fold Enrichment	Bonferroni	Benjamini	FDR
SP_PIR_KEYWORDS	Apoptosis	5	5.10204	0.126607	TSC22D3, UNC5A, CYCS, MGC29506, RTN3	98	381	19235	2.57579	1	0.598265	82.8837
GOTERM_BP_FAT	GO:0006915~apoptosis	7	7.14286	0.151464	TSC22D3, UNC5A, CYCS, MGC29506, THBS1, RPS27A, RTN3	82	602	13528	1.91832	1	0.8912	92.8683
GOTERM_BP_FAT	GO:0012501~programmed cell death	7	7.14286	0.158996	TSC22D3, UNC5A, CYCS, MGC29506, THBS1, RPS27A, RTN3	82	611	13528	1.89006	1	0.895538	93.8207
GOTERM_BP_FAT	GO:0008219~cell death	7	7.14286	0.260553	TSC22D3, UNC5A, CYCS, MGC29506, THBS1, RPS27A, RTN3	82	719	13528	1.60616	1	0.963126	99.2195
GOTERM_BP_FAT	GO:0016265~death	7	7.14286	0.265658	TSC22D3, UNC5A, CYCS, MGC29506, THBS1, RPS27A, RTN3	82	724	13528	1.59507	1	0.962455	99.3018
Annotation Cluster 40	Enrichment Score: 0.7203737500488016
Category	Term	Count	%	PValue	Genes	List Total	Pop Hits	Pop Total	Fold Enrichment	Bonferroni	Benjamini	FDR
SP_PIR_KEYWORDS	transmembrane protein	12	12.2449	0.000387352	GGT5, PAM, SDC1, S1PR1, CYP27A1, PECAM1, PTGFR, FCGR3B, CD74, IL3RA, MGST1, CD163	98	642	19235	3.6687	0.0944214	0.00897595	0.503908
SP_PIR_KEYWORDS	membrane	36	36.7347	0.258339	PAM, TSPAN5, TLR2, AP3S1, GNG11, PLVAP, ABCA1, UQCRFS1, TENC1, CD74, RTN3, TSC22D3, C5ORF43, S1PR1, UNC5A, CLEC2D, LRRC70, SLC39A8, FCGR3B, SVEP1, SCD, GALNTL2, GOLIM4, PTGFR, CD163, GGT5, C20ORF30, MAGT1, SDC1, RDH10, CYP27A1, PECAM1, CYBRD1, SGCE, IL3RA, MGST1	98	6256	19235	1.12946	1	0.817352	97.9697
SP_PIR_KEYWORDS	transmembrane	29	29.5918	0.282508	PAM, TSPAN5, TLR2, PLVAP, ABCA1, UQCRFS1, CD74, RTN3, C5ORF43, TSC22D3, S1PR1, UNC5A, LRRC70, SLC39A8, CLEC2D, SCD, GALNTL2, GOLIM4, PTGFR, CD163, C20ORF30, GGT5, MAGT1, SDC1, RDH10, PECAM1, CYBRD1, SGCE, IL3RA	98	4973	19235	1.14458	1	0.829774	98.6819
UP_SEQ_FEATURE	transmembrane region	28	28.5714	0.350811	PAM, TSPAN5, TLR2, PLVAP, ABCA1, CD74, RTN3, C5ORF43, TSC22D3, S1PR1, UNC5A, LRRC70, SLC39A8, CLEC2D, SCD, GALNTL2, GOLIM4, PTGFR, CD163, C20ORF30, GGT5, MAGT1, SDC1, RDH10, PECAM1, CYBRD1, SGCE, IL3RA	98	4911	19113	1.11196	1	0.999546	99.7945
UP_SEQ_FEATURE	topological domain:Extracellular	16	16.3265	0.406279	TSPAN5, TLR2, PLVAP, ABCA1, PTGFR, CD74, CD163, GGT5, SDC1, S1PR1, UNC5A, PECAM1, SLC39A8, CLEC2D, SGCE, IL3RA	98	2719	19113	1.14766	1	0.999871	99.9428
UP_SEQ_FEATURE	topological domain:Cytoplasmic	18	18.3673	0.554958	PAM, TSPAN5, GALNTL2, TLR2, GOLIM4, PLVAP, PTGFR, CD74, CD163, GGT5, SDC1, S1PR1, UNC5A, PECAM1, SLC39A8, CLEC2D, SGCE, IL3RA	98	3374	19113	1.04047	1	0.999998	99.9991
GOTERM_CC_FAT	GO:0016021~integral to membrane	30	30.6122	0.87473	PAM, TSPAN5, TLR2, PLVAP, ABCA1, UQCRFS1, CD74, RTN3, C5ORF43, TSC22D3, S1PR1, UNC5A, CLEC2D, LRRC70, SLC39A8, LY96, SCD, GALNTL2, GOLIM4, PTGFR, CD163, C20ORF30, GGT5, MAGT1, SDC1, RDH10, PECAM1, CYBRD1, SGCE, IL3RA	82	5297	12782	0.882828	1	0.998602	100
GOTERM_CC_FAT	GO:0031224~intrinsic to membrane	31	31.6327	0.882375	PAM, TSPAN5, TLR2, PLVAP, ABCA1, UQCRFS1, CD74, RTN3, TSC22D3, C5ORF43, S1PR1, UNC5A, CLEC2D, LRRC70, SLC39A8, FCGR3B, LY96, SCD, GALNTL2, GOLIM4, PTGFR, CD163, C20ORF30, GGT5, MAGT1, SDC1, RDH10, PECAM1, CYBRD1, SGCE, IL3RA	82	5485	12782	0.880988	1	0.998722	100
Annotation Cluster 41	Enrichment Score: 0.6751222544912037
Category	Term	Count	%	PValue	Genes	List Total	Pop Hits	Pop Total	Fold Enrichment	Bonferroni	Benjamini	FDR
GOTERM_BP_FAT	GO:0051338~regulation of transferase activity	6	6.12245	0.0721608	PPARG, FABP4, ZEB2, THBS1, CD74, APC	82	372	13528	2.6609	1	0.784627	70.0055
GOTERM_BP_FAT	GO:0043406~positive regulation of MAP kinase activity	3	3.06122	0.124559	ZEB2, THBS1, CD74	82	102	13528	4.85222	1	0.855302	88.2198
GOTERM_BP_FAT	GO:0042325~regulation of phosphorylation	6	6.12245	0.146893	FABP4, ZEB2, THBS1, ADIPOQ, CD74, APC	82	466	13528	2.12415	1	0.891845	92.2249
GOTERM_BP_FAT	GO:0045859~regulation of protein kinase activity	5	5.10204	0.152114	FABP4, ZEB2, THBS1, CD74, APC	82	345	13528	2.39095	1	0.889494	92.9557
GOTERM_BP_FAT	GO:0006928~cell motion	6	6.12245	0.155367	UNC5A, ZEB2, THBS1, RPS27A, THBS4, APC	82	475	13528	2.0839	1	0.892265	93.3778
GOTERM_BP_FAT	GO:0051174~regulation of phosphorus metabolic process	6	6.12245	0.165018	FABP4, ZEB2, THBS1, ADIPOQ, CD74, APC	82	485	13528	2.04094	1	0.902339	94.495
GOTERM_BP_FAT	GO:0019220~regulation of phosphate metabolic process	6	6.12245	0.165018	FABP4, ZEB2, THBS1, ADIPOQ, CD74, APC	82	485	13528	2.04094	1	0.902339	94.495
GOTERM_BP_FAT	GO:0043549~regulation of kinase activity	5	5.10204	0.165757	FABP4, ZEB2, THBS1, CD74, APC	82	357	13528	2.31058	1	0.900907	94.5728
GOTERM_BP_FAT	GO:0043085~positive regulation of catalytic activity	6	6.12245	0.200597	S1PR1, CYCS, ZEB2, THBS1, CD74, RPS27A	82	520	13528	1.90356	1	0.933165	97.2665
GOTERM_BP_FAT	GO:0043405~regulation of MAP kinase activity	3	3.06122	0.20671	ZEB2, THBS1, CD74	82	141	13528	3.51012	1	0.935468	97.5839
GOTERM_BP_FAT	GO:0016477~cell migration	4	4.08163	0.229067	ZEB2, THBS1, THBS4, APC	82	276	13528	2.39095	1	0.94954	98.4742
GOTERM_BP_FAT	GO:0051094~positive regulation of developmental process	4	4.08163	0.232236	PPARG, THBS1, CD74, APC	82	278	13528	2.37375	1	0.950402	98.5719
GOTERM_BP_FAT	GO:0048870~cell motility	4	4.08163	0.278959	ZEB2, THBS1, THBS4, APC	82	307	13528	2.14952	1	0.964998	99.4796
GOTERM_BP_FAT	GO:0051674~localization of cell	4	4.08163	0.278959	ZEB2, THBS1, THBS4, APC	82	307	13528	2.14952	1	0.964998	99.4796
GOTERM_BP_FAT	GO:0045860~positive regulation of protein kinase activity	3	3.06122	0.386922	ZEB2, THBS1, CD74	82	223	13528	2.2194	1	0.985347	99.9616
GOTERM_BP_FAT	GO:0033674~positive regulation of kinase activity	3	3.06122	0.403857	ZEB2, THBS1, CD74	82	231	13528	2.14254	1	0.986892	99.9756
GOTERM_BP_FAT	GO:0051347~positive regulation of transferase activity	3	3.06122	0.422647	ZEB2, THBS1, CD74	82	240	13528	2.0622	1	0.988579	99.9854
GOTERM_BP_FAT	GO:0010627~regulation of protein kinase cascade	3	3.06122	0.441138	ZEB2, ADIPOQ, APC	82	249	13528	1.98766	1	0.989038	99.9913
Annotation Cluster 42	Enrichment Score: 0.6515933034801892
Category	Term	Count	%	PValue	Genes	List Total	Pop Hits	Pop Total	Fold Enrichment	Bonferroni	Benjamini	FDR
GOTERM_BP_FAT	GO:0032101~regulation of response to external stimulus	6	6.12245	0.00263101	S1PR1, PPARG, FABP4, THBS1, ADIPOQ, PROC	82	159	13528	6.22549	0.951412	0.285407	4.14714
GOTERM_BP_FAT	GO:0044087~regulation of cellular component biogenesis	4	4.08163	0.0534417	S1PR1, THBS1, RPS27A, APC	82	142	13528	4.6472	1	0.769224	58.6469
GOTERM_BP_FAT	GO:0051338~regulation of transferase activity	6	6.12245	0.0721608	PPARG, FABP4, ZEB2, THBS1, CD74, APC	82	372	13528	2.6609	1	0.784627	70.0055
GOTERM_BP_FAT	GO:0043086~negative regulation of catalytic activity	5	5.10204	0.0844819	S1PR1, PPARG, FABP4, RPS27A, APC	82	277	13528	2.9779	1	0.79979	75.8065
GOTERM_BP_FAT	GO:0051348~negative regulation of transferase activity	3	3.06122	0.112763	PPARG, FABP4, APC	82	96	13528	5.15549	1	0.847639	85.3914
GOTERM_BP_FAT	GO:0044092~negative regulation of molecular function	5	5.10204	0.140014	S1PR1, PPARG, FABP4, RPS27A, APC	82	334	13528	2.46969	1	0.882089	91.1533
GOTERM_BP_FAT	GO:0048878~chemical homeostasis	6	6.12245	0.192234	CCL14, S1PR1, PPARG, FABP4, ABCA1, ADIPOQ	82	512	13528	1.93331	1	0.92626	96.7687
GOTERM_BP_FAT	GO:0010604~positive regulation of macromolecule metabolic process	6	6.12245	0.589152	S1PR1, PPARG, THBS1, ADIPOQ, RPS27A, APC	82	857	13528	1.15502	1	0.997708	99.9999
GOTERM_BP_FAT	GO:0031328~positive regulation of cellular biosynthetic process	5	5.10204	0.592177	S1PR1, PPARG, ABCA1, THBS1, RPS27A	82	685	13528	1.2042	1	0.997741	99.9999
GOTERM_BP_FAT	GO:0009891~positive regulation of biosynthetic process	5	5.10204	0.60379	S1PR1, PPARG, ABCA1, THBS1, RPS27A	82	695	13528	1.18687	1	0.997928	100
GOTERM_BP_FAT	GO:0045935~positive regulation of nucleobase, nucleoside, nucleotide and nucleic acid metabolic process	4	4.08163	0.728317	S1PR1, PPARG, ABCA1, RPS27A	82	624	13528	1.05754	1	0.999731	100
GOTERM_BP_FAT	GO:0051173~positive regulation of nitrogen compound metabolic process	4	4.08163	0.747991	S1PR1, PPARG, ABCA1, RPS27A	82	644	13528	1.02469	1	0.999824	100
GOTERM_BP_FAT	GO:0010557~positive regulation of macromolecule biosynthetic process	4	4.08163	0.757403	S1PR1, PPARG, THBS1, RPS27A	82	654	13528	1.00903	1	0.999855	100
GOTERM_BP_FAT	GO:0045941~positive regulation of transcription	3	3.06122	0.857109	S1PR1, PPARG, RPS27A	82	564	13528	0.87753	1	0.999993	100
GOTERM_BP_FAT	GO:0010628~positive regulation of gene expression	3	3.06122	0.868403	S1PR1, PPARG, RPS27A	82	581	13528	0.851853	1	0.999995	100
Annotation Cluster 43	Enrichment Score: 0.6487245757726953
Category	Term	Count	%	PValue	Genes	List Total	Pop Hits	Pop Total	Fold Enrichment	Bonferroni	Benjamini	FDR
GOTERM_BP_FAT	GO:0008217~regulation of blood pressure	3	3.06122	0.120594	PPARG, COL1A2, ADIPOQ	82	100	13528	4.94927	1	0.852796	87.332
GOTERM_BP_FAT	GO:0008015~blood circulation	3	3.06122	0.306373	PPARG, COL1A2, ADIPOQ	82	186	13528	2.6609	1	0.974057	99.7209
GOTERM_BP_FAT	GO:0003013~circulatory system process	3	3.06122	0.306373	PPARG, COL1A2, ADIPOQ	82	186	13528	2.6609	1	0.974057	99.7209
Annotation Cluster 44	Enrichment Score: 0.6447313873503299
Category	Term	Count	%	PValue	Genes	List Total	Pop Hits	Pop Total	Fold Enrichment	Bonferroni	Benjamini	FDR
GOTERM_BP_FAT	GO:0030155~regulation of cell adhesion	5	5.10204	0.00917881	S1PR1, COL8A1, THBS1, ADIPOQ, APC	82	137	13528	6.02101	0.999975	0.506251	13.7788
GOTERM_BP_FAT	GO:0051129~negative regulation of cellular component organization	4	4.08163	0.0534417	S1PR1, THBS1, ADIPOQ, APC	82	142	13528	4.6472	1	0.769224	58.6469
GOTERM_BP_FAT	GO:0042981~regulation of apoptosis	9	9.18367	0.107523	BTG2, CYCS, TLR2, THBS1, ADIPOQ, CD74, RPS27A, PROC, APC	82	804	13528	1.84674	1	0.853458	83.9409
GOTERM_BP_FAT	GO:0043067~regulation of programmed cell death	9	9.18367	0.112125	BTG2, CYCS, TLR2, THBS1, ADIPOQ, CD74, RPS27A, PROC, APC	82	812	13528	1.82855	1	0.849859	85.2217
GOTERM_BP_FAT	GO:0010941~regulation of cell death	9	9.18367	0.113878	BTG2, CYCS, TLR2, THBS1, ADIPOQ, CD74, RPS27A, PROC, APC	82	815	13528	1.82182	1	0.846737	85.684
GOTERM_BP_FAT	GO:0042325~regulation of phosphorylation	6	6.12245	0.146893	FABP4, ZEB2, THBS1, ADIPOQ, CD74, APC	82	466	13528	2.12415	1	0.891845	92.2249
GOTERM_BP_FAT	GO:0051174~regulation of phosphorus metabolic process	6	6.12245	0.165018	FABP4, ZEB2, THBS1, ADIPOQ, CD74, APC	82	485	13528	2.04094	1	0.902339	94.495
GOTERM_BP_FAT	GO:0019220~regulation of phosphate metabolic process	6	6.12245	0.165018	FABP4, ZEB2, THBS1, ADIPOQ, CD74, APC	82	485	13528	2.04094	1	0.902339	94.495
GOTERM_BP_FAT	GO:0051247~positive regulation of protein metabolic process	4	4.08163	0.178285	THBS1, ADIPOQ, RPS27A, APC	82	243	13528	2.71565	1	0.91602	95.7447
GOTERM_BP_FAT	GO:0010605~negative regulation of macromolecule metabolic process	7	7.14286	0.275949	PPARG, FABP4, ZEB2, THBS1, ADIPOQ, S100A1, RPS27A	82	734	13528	1.57334	1	0.965605	99.4435
GOTERM_BP_FAT	GO:0010647~positive regulation of cell communication	4	4.08163	0.315021	ZEB2, THBS1, ADIPOQ, RPS27A	82	329	13528	2.00578	1	0.976353	99.7719
GOTERM_BP_FAT	GO:0009968~negative regulation of signal transduction	3	3.06122	0.382656	THBS1, ADIPOQ, APC	82	221	13528	2.23949	1	0.984926	99.9571
GOTERM_BP_FAT	GO:0032270~positive regulation of cellular protein metabolic process	3	3.06122	0.408057	THBS1, ADIPOQ, RPS27A	82	233	13528	2.12415	1	0.987246	99.9782
GOTERM_BP_FAT	GO:0010648~negative regulation of cell communication	3	3.06122	0.439099	THBS1, ADIPOQ, APC	82	248	13528	1.99567	1	0.989062	99.9908
GOTERM_BP_FAT	GO:0043065~positive regulation of apoptosis	4	4.08163	0.477951	TLR2, ADIPOQ, RPS27A, APC	82	430	13528	1.53466	1	0.991886	99.9971
GOTERM_BP_FAT	GO:0043068~positive regulation of programmed cell death	4	4.08163	0.48257	TLR2, ADIPOQ, RPS27A, APC	82	433	13528	1.52402	1	0.992161	99.9975
GOTERM_BP_FAT	GO:0010942~positive regulation of cell death	4	4.08163	0.485639	TLR2, ADIPOQ, RPS27A, APC	82	435	13528	1.51702	1	0.992018	99.9977
GOTERM_BP_FAT	GO:0031399~regulation of protein modification process	3	3.06122	0.530307	ZEB2, ADIPOQ, RPS27A	82	295	13528	1.67772	1	0.995276	99.9995
GOTERM_BP_FAT	GO:0009967~positive regulation of signal transduction	3	3.06122	0.530307	ZEB2, THBS1, ADIPOQ	82	295	13528	1.67772	1	0.995276	99.9995
GOTERM_BP_FAT	GO:0032268~regulation of cellular protein metabolic process	4	4.08163	0.543688	ZEB2, THBS1, ADIPOQ, RPS27A	82	474	13528	1.3922	1	0.996017	99.9997
GOTERM_BP_FAT	GO:0010604~positive regulation of macromolecule metabolic process	6	6.12245	0.589152	S1PR1, PPARG, THBS1, ADIPOQ, RPS27A, APC	82	857	13528	1.15502	1	0.997708	99.9999
Annotation Cluster 45	Enrichment Score: 0.5991136701628277
Category	Term	Count	%	PValue	Genes	List Total	Pop Hits	Pop Total	Fold Enrichment	Bonferroni	Benjamini	FDR
GOTERM_BP_FAT	GO:0042592~homeostatic process	11	11.2245	0.0138968	CTSK, CCL14, LIPA, S1PR1, PRDX6, PPARG, FABP4, ABCA1, ADIPOQ, FH, APC	82	751	13528	2.41642	1	0.518211	20.1479
GOTERM_BP_FAT	GO:0048878~chemical homeostasis	6	6.12245	0.192234	CCL14, S1PR1, PPARG, FABP4, ABCA1, ADIPOQ	82	512	13528	1.93331	1	0.92626	96.7687
GOTERM_BP_FAT	GO:0019725~cellular homeostasis	5	5.10204	0.30487	CCL14, S1PR1, PRDX6, ADIPOQ, APC	82	466	13528	1.77012	1	0.97514	99.7111
GOTERM_BP_FAT	GO:0006873~cellular ion homeostasis	3	3.06122	0.65994	CCL14, S1PR1, ADIPOQ	82	374	13528	1.32333	1	0.99912	100
GOTERM_BP_FAT	GO:0055082~cellular chemical homeostasis	3	3.06122	0.668536	CCL14, S1PR1, ADIPOQ	82	380	13528	1.30244	1	0.999193	100
GOTERM_BP_FAT	GO:0050801~ion homeostasis	3	3.06122	0.707666	CCL14, S1PR1, ADIPOQ	82	409	13528	1.21009	1	0.99959	100
Annotation Cluster 46	Enrichment Score: 0.5885118688967855
Category	Term	Count	%	PValue	Genes	List Total	Pop Hits	Pop Total	Fold Enrichment	Bonferroni	Benjamini	FDR
GOTERM_BP_FAT	GO:0045596~negative regulation of cell differentiation	7	7.14286	0.00185353	LMO2, PPARG, ABCA1, C1QC, ADIPOQ, CD74, APC	82	216	13528	5.34643	0.881143	0.262332	2.93875
GOTERM_BP_FAT	GO:0042325~regulation of phosphorylation	6	6.12245	0.146893	FABP4, ZEB2, THBS1, ADIPOQ, CD74, APC	82	466	13528	2.12415	1	0.891845	92.2249
GOTERM_BP_FAT	GO:0051174~regulation of phosphorus metabolic process	6	6.12245	0.165018	FABP4, ZEB2, THBS1, ADIPOQ, CD74, APC	82	485	13528	2.04094	1	0.902339	94.495
GOTERM_BP_FAT	GO:0019220~regulation of phosphate metabolic process	6	6.12245	0.165018	FABP4, ZEB2, THBS1, ADIPOQ, CD74, APC	82	485	13528	2.04094	1	0.902339	94.495
GOTERM_BP_FAT	GO:0065003~macromolecular complex assembly	6	6.12245	0.367422	H3F3A, ABCA1, H3F3C, ADIPOQ, CD74, APC	82	665	13528	1.4885	1	0.983547	99.9366
GOTERM_BP_FAT	GO:0043933~macromolecular complex subunit organization	6	6.12245	0.421516	H3F3A, ABCA1, H3F3C, ADIPOQ, CD74, APC	82	710	13528	1.39416	1	0.988759	99.9849
GOTERM_CC_FAT	GO:0044427~chromosomal part	3	3.06122	0.707114	H3F3A, H3F3C, APC	82	386	12782	1.21149	1	0.991261	100
GOTERM_BP_FAT	GO:0051276~chromosome organization	3	3.06122	0.792443	H3F3A, H3F3C, APC	82	485	13528	1.02047	1	0.999939	100
GOTERM_CC_FAT	GO:0005694~chromosome	3	3.06122	0.794261	H3F3A, H3F3C, APC	82	460	12782	1.0166	1	0.995701	100
GOTERM_BP_FAT	GO:0006461~protein complex assembly	3	3.06122	0.810871	ADIPOQ, CD74, APC	82	505	13528	0.980053	1	0.999964	100
GOTERM_BP_FAT	GO:0070271~protein complex biogenesis	3	3.06122	0.810871	ADIPOQ, CD74, APC	82	505	13528	0.980053	1	0.999964	100
Annotation Cluster 47	Enrichment Score: 0.5471342835610133
Category	Term	Count	%	PValue	Genes	List Total	Pop Hits	Pop Total	Fold Enrichment	Bonferroni	Benjamini	FDR
GOTERM_MF_FAT	GO:0042802~identical protein binding	7	7.14286	0.178686	COL1A2, PLVAP, THBS1, ADIPOQ, S100A1, CD74, MGST1	78	640	12983	1.82053	1	0.938902	92.6357
GOTERM_MF_FAT	GO:0042803~protein homodimerization activity	4	4.08163	0.318033	PLVAP, ADIPOQ, S100A1, MGST1	78	334	12983	1.9934	1	0.984718	99.3732
GOTERM_MF_FAT	GO:0046983~protein dimerization activity	5	5.10204	0.401822	PPARG, PLVAP, ADIPOQ, S100A1, MGST1	78	542	12983	1.5355	1	0.993477	99.8897
Annotation Cluster 48	Enrichment Score: 0.5378981812509938
Category	Term	Count	%	PValue	Genes	List Total	Pop Hits	Pop Total	Fold Enrichment	Bonferroni	Benjamini	FDR
UP_SEQ_FEATURE	domain:EF-hand 2	3	3.06122	0.235969	S100A1, PPP2R3C, RCN1	98	182	19113	3.21479	1	0.995457	97.882
UP_SEQ_FEATURE	domain:EF-hand 1	3	3.06122	0.235969	S100A1, PPP2R3C, RCN1	98	182	19113	3.21479	1	0.995457	97.882
INTERPRO	IPR018247:EF-HAND 1	3	3.06122	0.337445	S100A1, PPP2R3C, RCN1	93	217	16659	2.47644	1	0.998906	99.5469
INTERPRO	IPR011992:EF-Hand type	3	3.06122	0.375402	S100A1, PPP2R3C, RCN1	93	236	16659	2.27706	1	0.999349	99.7909
Annotation Cluster 49	Enrichment Score: 0.5059080705263966
Category	Term	Count	%	PValue	Genes	List Total	Pop Hits	Pop Total	Fold Enrichment	Bonferroni	Benjamini	FDR
GOTERM_MF_FAT	GO:0046872~metal ion binding	30	30.6122	0.166265	PAM, LMO2, PPARG, ZEB2, UQCRFS1, TENC1, PAK3, P4HA1, P4HA3, FASN, SLC39A8, THBS1, S100A1, RPS27A, THBS4, CRIP1, SVEP1, EGFL7, CRIP2, SCD, CYCS, GALNTL2, HBA2, HBA1, PHYH, PROC, CYP27A1, CYBRD1, SGCE, PPP2R3C, RCN1	78	4140	12983	1.20615	1	0.943246	91.015
GOTERM_MF_FAT	GO:0043169~cation binding	30	30.6122	0.181029	PAM, LMO2, PPARG, ZEB2, UQCRFS1, TENC1, PAK3, P4HA1, P4HA3, FASN, SLC39A8, THBS1, S100A1, RPS27A, THBS4, CRIP1, SVEP1, EGFL7, CRIP2, SCD, CYCS, GALNTL2, HBA2, HBA1, PHYH, PROC, CYP27A1, CYBRD1, SGCE, PPP2R3C, RCN1	78	4179	12983	1.19489	1	0.932848	92.9092
GOTERM_MF_FAT	GO:0046914~transition metal ion binding	21	21.4286	0.200762	PAM, CRIP1, LMO2, CRIP2, SCD, CYCS, PPARG, GALNTL2, HBA2, ZEB2, HBA1, UQCRFS1, TENC1, PHYH, CYP27A1, P4HA1, P4HA3, SLC39A8, CYBRD1, FASN, RPS27A, S100A1	78	2785	12983	1.25509	1	0.944584	94.8675
GOTERM_MF_FAT	GO:0043167~ion binding	30	30.6122	0.206018	PAM, LMO2, PPARG, ZEB2, UQCRFS1, TENC1, PAK3, P4HA1, P4HA3, FASN, SLC39A8, THBS1, S100A1, RPS27A, THBS4, CRIP1, SVEP1, EGFL7, CRIP2, SCD, CYCS, GALNTL2, HBA2, HBA1, PHYH, PROC, CYP27A1, CYBRD1, SGCE, PPP2R3C, RCN1	78	4241	12983	1.17743	1	0.942073	95.2971
SP_PIR_KEYWORDS	metal-binding	18	18.3673	0.325641	PAM, CRIP1, LMO2, CRIP2, CYCS, PPARG, HBA2, ZEB2, HBA1, UQCRFS1, TENC1, PHYH, CYP27A1, P4HA1, PAK3, P4HA3, CYBRD1, RPS27A, S100A1	98	2972	19235	1.18875	1	0.866978	99.4127
SP_PIR_KEYWORDS	zinc	10	10.2041	0.788189	PAM, CRIP1, LMO2, CRIP2, PPARG, SLC39A8, ZEB2, TENC1, S100A1, RPS27A	98	2189	19235	0.896645	1	0.9971	100
GOTERM_MF_FAT	GO:0008270~zinc ion binding	11	11.2245	0.899785	PAM, CRIP1, LMO2, CRIP2, PPARG, SLC39A8, FASN, ZEB2, TENC1, S100A1, RPS27A	78	2311	12983	0.79227	1	1	100
Annotation Cluster 50	Enrichment Score: 0.4970922441052143
Category	Term	Count	%	PValue	Genes	List Total	Pop Hits	Pop Total	Fold Enrichment	Bonferroni	Benjamini	FDR
GOTERM_BP_FAT	GO:0009952~anterior/posterior pattern formation	3	3.06122	0.204523	BTG2, ZEB2, APC	82	140	13528	3.53519	1	0.935185	97.4746
GOTERM_BP_FAT	GO:0003002~regionalization	3	3.06122	0.330625	BTG2, ZEB2, APC	82	197	13528	2.51232	1	0.97851	99.8425
GOTERM_BP_FAT	GO:0007389~pattern specification process	3	3.06122	0.47714	BTG2, ZEB2, APC	82	267	13528	1.85366	1	0.992044	99.997
Annotation Cluster 51	Enrichment Score: 0.4544661702808596
Category	Term	Count	%	PValue	Genes	List Total	Pop Hits	Pop Total	Fold Enrichment	Bonferroni	Benjamini	FDR
GOTERM_MF_FAT	GO:0008289~lipid binding	8	8.16327	0.0171429	ALDH1A1, SNX9, S1PR1, PPARG, SNX2, FABP4, ABCA1, TENC1	78	450	12983	2.95909	0.992633	0.388035	20.4779
GOTERM_MF_FAT	GO:0005543~phospholipid binding	3	3.06122	0.282698	SNX9, SNX2, ABCA1	78	177	12983	2.82116	1	0.97705	98.7758
GOTERM_BP_FAT	GO:0006886~intracellular protein transport	4	4.08163	0.388878	SNX9, SNX2, AP3S1, CD74	82	374	13528	1.76445	1	0.985286	99.9636
GOTERM_BP_FAT	GO:0034613~cellular protein localization	4	4.08163	0.44829	SNX9, SNX2, AP3S1, CD74	82	411	13528	1.6056	1	0.989768	99.993
GOTERM_BP_FAT	GO:0070727~cellular macromolecule localization	4	4.08163	0.453018	SNX9, SNX2, AP3S1, CD74	82	414	13528	1.59397	1	0.989816	99.9939
GOTERM_BP_FAT	GO:0016192~vesicle-mediated transport	5	5.10204	0.454674	SNX2, AP3S1, ABCA1, THBS1, RTN3	82	576	13528	1.43208	1	0.989742	99.9942
GOTERM_BP_FAT	GO:0015031~protein transport	6	6.12245	0.483085	SNX9, PPARG, SNX2, AP3S1, ABCA1, CD74	82	762	13528	1.29902	1	0.991974	99.9975
GOTERM_BP_FAT	GO:0045184~establishment of protein localization	6	6.12245	0.49123	SNX9, PPARG, SNX2, AP3S1, ABCA1, CD74	82	769	13528	1.2872	1	0.992396	99.9981
GOTERM_BP_FAT	GO:0046907~intracellular transport	5	5.10204	0.558665	SNX9, SNX2, AP3S1, ABCA1, CD74	82	657	13528	1.25552	1	0.996739	99.9998
GOTERM_BP_FAT	GO:0008104~protein localization	6	6.12245	0.615131	SNX9, PPARG, SNX2, AP3S1, ABCA1, CD74	82	882	13528	1.12228	1	0.998096	100
SP_PIR_KEYWORDS	protein transport	3	3.06122	0.706073	SNX9, SNX2, AP3S1	98	485	19235	1.21408	1	0.991342	100
Annotation Cluster 52	Enrichment Score: 0.43268288541010974
Category	Term	Count	%	PValue	Genes	List Total	Pop Hits	Pop Total	Fold Enrichment	Bonferroni	Benjamini	FDR
GOTERM_BP_FAT	GO:0006928~cell motion	6	6.12245	0.155367	UNC5A, ZEB2, THBS1, RPS27A, THBS4, APC	82	475	13528	2.0839	1	0.892265	93.3778
GOTERM_BP_FAT	GO:0030182~neuron differentiation	5	5.10204	0.267252	S1PR1, BTG2, UNC5A, RPS27A, APC	82	438	13528	1.88328	1	0.962183	99.3258
GOTERM_BP_FAT	GO:0007409~axonogenesis	3	3.06122	0.321828	UNC5A, RPS27A, APC	82	193	13528	2.56439	1	0.977863	99.8058
GOTERM_BP_FAT	GO:0048667~cell morphogenesis involved in neuron differentiation	3	3.06122	0.35682	UNC5A, RPS27A, APC	82	209	13528	2.36807	1	0.983191	99.9171
GOTERM_BP_FAT	GO:0000902~cell morphogenesis	4	4.08163	0.359435	LIPA, UNC5A, RPS27A, APC	82	356	13528	1.85366	1	0.983271	99.9224
GOTERM_BP_FAT	GO:0048812~neuron projection morphogenesis	3	3.06122	0.365476	UNC5A, RPS27A, APC	82	213	13528	2.3236	1	0.983622	99.9333
GOTERM_BP_FAT	GO:0030030~cell projection organization	4	4.08163	0.379091	UNC5A, RPS27A, THBS4, APC	82	368	13528	1.79321	1	0.985608	99.953
GOTERM_BP_FAT	GO:0032989~cellular component morphogenesis	4	4.08163	0.426033	LIPA, UNC5A, RPS27A, APC	82	397	13528	1.66222	1	0.988761	99.9867
GOTERM_BP_FAT	GO:0000904~cell morphogenesis involved in differentiation	3	3.06122	0.430903	UNC5A, RPS27A, APC	82	244	13528	2.02839	1	0.988824	99.9884
GOTERM_BP_FAT	GO:0048858~cell projection morphogenesis	3	3.06122	0.432958	UNC5A, RPS27A, APC	82	245	13528	2.02011	1	0.988798	99.9891
GOTERM_BP_FAT	GO:0032990~cell part morphogenesis	3	3.06122	0.455299	UNC5A, RPS27A, APC	82	256	13528	1.93331	1	0.989521	99.9943
GOTERM_BP_FAT	GO:0031175~neuron projection development	3	3.06122	0.455299	UNC5A, RPS27A, APC	82	256	13528	1.93331	1	0.989521	99.9943
GOTERM_BP_FAT	GO:0048666~neuron development	3	3.06122	0.606296	UNC5A, RPS27A, APC	82	339	13528	1.45996	1	0.997867	100
Annotation Cluster 53	Enrichment Score: 0.39601497779721456
Category	Term	Count	%	PValue	Genes	List Total	Pop Hits	Pop Total	Fold Enrichment	Bonferroni	Benjamini	FDR
GOTERM_CC_FAT	GO:0005912~adherens junction	3	3.06122	0.257627	SDC1, TENC1, APC	82	155	12782	3.01699	1	0.871703	97.5574
GOTERM_CC_FAT	GO:0070161~anchoring junction	3	3.06122	0.297604	SDC1, TENC1, APC	82	172	12782	2.7188	1	0.904726	98.7746
GOTERM_CC_FAT	GO:0030054~cell junction	3	3.06122	0.84591	SDC1, TENC1, APC	82	518	12782	0.902769	1	0.99756	100
Annotation Cluster 54	Enrichment Score: 0.3388759114191138
Category	Term	Count	%	PValue	Genes	List Total	Pop Hits	Pop Total	Fold Enrichment	Bonferroni	Benjamini	FDR
GOTERM_BP_FAT	GO:0010324~membrane invagination	3	3.06122	0.380519	SNX2, ABCA1, THBS1	82	220	13528	2.24967	1	0.98543	99.9547
GOTERM_BP_FAT	GO:0006897~endocytosis	3	3.06122	0.380519	SNX2, ABCA1, THBS1	82	220	13528	2.24967	1	0.98543	99.9547
GOTERM_BP_FAT	GO:0016192~vesicle-mediated transport	5	5.10204	0.454674	SNX2, AP3S1, ABCA1, THBS1, RTN3	82	576	13528	1.43208	1	0.989742	99.9942
GOTERM_BP_FAT	GO:0016044~membrane organization	3	3.06122	0.669952	SNX2, ABCA1, THBS1	82	381	13528	1.29902	1	0.999183	100
Annotation Cluster 55	Enrichment Score: 0.29416212983996864
Category	Term	Count	%	PValue	Genes	List Total	Pop Hits	Pop Total	Fold Enrichment	Bonferroni	Benjamini	FDR
GOTERM_MF_FAT	GO:0009055~electron carrier activity	4	4.08163	0.143489	CYP27A1, CYCS, UQCRFS1, PHYH	78	221	12983	3.01265	1	0.936026	87.1583
SP_PIR_KEYWORDS	mitochondrion	6	6.12245	0.410231	TSC22D3, CYP27A1, CYCS, UQCRFS1, MGST1, FH	98	832	19235	1.41545	1	0.914369	99.8977
GOTERM_CC_FAT	GO:0031980~mitochondrial lumen	3	3.06122	0.423187	CYP27A1, CYCS, FH	82	227	12782	2.06006	1	0.951885	99.8947
GOTERM_CC_FAT	GO:0005759~mitochondrial matrix	3	3.06122	0.423187	CYP27A1, CYCS, FH	82	227	12782	2.06006	1	0.951885	99.8947
SP_PIR_KEYWORDS	transit peptide	4	4.08163	0.431958	CYP27A1, UQCRFS1, PHYH, FH	98	476	19235	1.64937	1	0.921138	99.9373
GOTERM_CC_FAT	GO:0005740~mitochondrial envelope	4	4.08163	0.498547	CYP27A1, CYCS, UQCRFS1, MGST1	82	419	12782	1.4881	1	0.967151	99.9816
GOTERM_CC_FAT	GO:0044429~mitochondrial part	5	5.10204	0.524739	CYP27A1, CYCS, UQCRFS1, MGST1, FH	82	595	12782	1.3099	1	0.969855	99.9906
GOTERM_CC_FAT	GO:0031967~organelle envelope	5	5.10204	0.5577	CYP27A1, SCD, CYCS, UQCRFS1, MGST1	82	620	12782	1.25708	1	0.97645	99.9962
GOTERM_CC_FAT	GO:0031975~envelope	5	5.10204	0.560286	CYP27A1, SCD, CYCS, UQCRFS1, MGST1	82	622	12782	1.25304	1	0.974973	99.9964
GOTERM_CC_FAT	GO:0005743~mitochondrial inner membrane	3	3.06122	0.581264	CYP27A1, UQCRFS1, MGST1	82	306	12782	1.52822	1	0.978037	99.9981
GOTERM_CC_FAT	GO:0019866~organelle inner membrane	3	3.06122	0.621032	CYP27A1, UQCRFS1, MGST1	82	329	12782	1.42138	1	0.982941	99.9994
UP_SEQ_FEATURE	transit peptide:Mitochondrion	3	3.06122	0.689499	CYP27A1, UQCRFS1, FH	98	467	19113	1.25287	1	1	100
GOTERM_CC_FAT	GO:0005739~mitochondrion	7	7.14286	0.696677	TSC22D3, CYP27A1, P4HA1, CYCS, UQCRFS1, MGST1, FH	82	1087	12782	1.00381	1	0.991743	100
GOTERM_CC_FAT	GO:0031966~mitochondrial membrane	3	3.06122	0.717819	CYP27A1, UQCRFS1, MGST1	82	394	12782	1.18689	1	0.99167	100
GOTERM_CC_FAT	GO:0031090~organelle membrane	6	6.12245	0.835	MAGT1, CYP27A1, SCD, PECAM1, UQCRFS1, MGST1	82	1096	12782	0.853347	1	0.997244	100
Annotation Cluster 56	Enrichment Score: 0.28834197233502684
Category	Term	Count	%	PValue	Genes	List Total	Pop Hits	Pop Total	Fold Enrichment	Bonferroni	Benjamini	FDR
GOTERM_CC_FAT	GO:0044459~plasma membrane part	17	17.3469	0.315864	TLR2, AP3S1, PLVAP, GNG11, ABCA1, PTGFR, TENC1, CD74, CD163, SDC1, S1PR1, CYBRD1, CLEC2D, SGCE, THBS1, IGFBP2, APC	82	2203	12782	1.20287	1	0.905892	99.1175
GOTERM_CC_FAT	GO:0005886~plasma membrane	27	27.551	0.346025	SNX9, TLR2, AP3S1, GNG11, PLVAP, ABCA1, TENC1, CD74, S1PR1, UNC5A, COL6A3, CLEC2D, THBS1, FCGR3B, APC, LGALS3, LY96, PTGFR, PROC, CD163, GGT5, SDC1, PECAM1, COL1A2, CYBRD1, SGCE, IGFBP2	82	3777	12782	1.1143	1	0.916572	99.4968
UP_SEQ_FEATURE	topological domain:Extracellular	16	16.3265	0.406279	TSPAN5, TLR2, PLVAP, ABCA1, PTGFR, CD74, CD163, GGT5, SDC1, S1PR1, UNC5A, PECAM1, SLC39A8, CLEC2D, SGCE, IL3RA	98	2719	19113	1.14766	1	0.999871	99.9428
SP_PIR_KEYWORDS	cell membrane	11	11.2245	0.680482	S1PR1, UNC5A, CLEC2D, PLVAP, GNG11, SGCE, PTGFR, TENC1, FCGR3B, CD74, CD163	98	2194	19235	0.984061	1	0.991004	100
GOTERM_CC_FAT	GO:0005887~integral to plasma membrane	7	7.14286	0.775824	SDC1, CLEC2D, TLR2, SGCE, ABCA1, PTGFR, CD163	82	1188	12782	0.918473	1	0.995683	100
GOTERM_CC_FAT	GO:0031226~intrinsic to plasma membrane	7	7.14286	0.794212	SDC1, CLEC2D, TLR2, SGCE, ABCA1, PTGFR, CD163	82	1215	12782	0.898063	1	0.996103	100
Annotation Cluster 57	Enrichment Score: 0.26248657429009953
Category	Term	Count	%	PValue	Genes	List Total	Pop Hits	Pop Total	Fold Enrichment	Bonferroni	Benjamini	FDR
GOTERM_BP_FAT	GO:0051338~regulation of transferase activity	6	6.12245	0.0721608	PPARG, FABP4, ZEB2, THBS1, CD74, APC	82	372	13528	2.6609	1	0.784627	70.0055
GOTERM_BP_FAT	GO:0010605~negative regulation of macromolecule metabolic process	7	7.14286	0.275949	PPARG, FABP4, ZEB2, THBS1, ADIPOQ, S100A1, RPS27A	82	734	13528	1.57334	1	0.965605	99.4435
GOTERM_BP_FAT	GO:0060429~epithelium development	3	3.06122	0.395415	S1PR1, PPARG, ZEB2	82	227	13528	2.18029	1	0.986146	99.9694
GOTERM_BP_FAT	GO:0010558~negative regulation of macromolecule biosynthetic process	5	5.10204	0.415579	PPARG, FABP4, ZEB2, ADIPOQ, S100A1	82	547	13528	1.508	1	0.988159	99.9822
GOTERM_BP_FAT	GO:0031327~negative regulation of cellular biosynthetic process	5	5.10204	0.434537	PPARG, FABP4, ZEB2, ADIPOQ, S100A1	82	561	13528	1.47037	1	0.988698	99.9895
GOTERM_BP_FAT	GO:0009890~negative regulation of biosynthetic process	5	5.10204	0.450663	PPARG, FABP4, ZEB2, ADIPOQ, S100A1	82	573	13528	1.43958	1	0.989793	99.9934
GOTERM_BP_FAT	GO:0016481~negative regulation of transcription	4	4.08163	0.521786	PPARG, FABP4, ZEB2, S100A1	82	459	13528	1.4377	1	0.994805	99.9993
GOTERM_BP_FAT	GO:0010629~negative regulation of gene expression	4	4.08163	0.585749	PPARG, FABP4, ZEB2, S100A1	82	504	13528	1.30933	1	0.997745	99.9999
GOTERM_BP_FAT	GO:0045934~negative regulation of nucleobase, nucleoside, nucleotide and nucleic acid metabolic process	4	4.08163	0.596552	PPARG, FABP4, ZEB2, S100A1	82	512	13528	1.28887	1	0.997743	100
GOTERM_BP_FAT	GO:0051172~negative regulation of nitrogen compound metabolic process	4	4.08163	0.605858	PPARG, FABP4, ZEB2, S100A1	82	519	13528	1.27149	1	0.997926	100
GOTERM_BP_FAT	GO:0006357~regulation of transcription from RNA polymerase II promoter	3	3.06122	0.936709	S1PR1, PPARG, S100A1	82	727	13528	0.68078	1	1	100
GOTERM_MF_FAT	GO:0003700~transcription factor activity	3	3.06122	0.982452	TSC22D3, PPARG, ZEB2	78	975	12983	0.51215	1	1	100
GOTERM_MF_FAT	GO:0030528~transcription regulator activity	5	5.10204	0.983624	TSC22D3, PPARG, FABP4, ZEB2, RPS27A	78	1512	12983	0.550426	1	1	100
GOTERM_BP_FAT	GO:0045449~regulation of transcription	9	9.18367	0.992865	TSC22D3, S1PR1, BTG2, PPARG, TLR2, FABP4, ZEB2, S100A1, RPS27A	82	2601	13528	0.57085	1	1	100
GOTERM_BP_FAT	GO:0006355~regulation of transcription, DNA-dependent	5	5.10204	0.995742	TSC22D3, S1PR1, PPARG, ZEB2, S100A1	82	1773	13528	0.465244	1	1	100
GOTERM_BP_FAT	GO:0051252~regulation of RNA metabolic process	5	5.10204	0.996537	TSC22D3, S1PR1, PPARG, ZEB2, S100A1	82	1813	13528	0.45498	1	1	100
Annotation Cluster 58	Enrichment Score: 0.24894891363289456
Category	Term	Count	%	PValue	Genes	List Total	Pop Hits	Pop Total	Fold Enrichment	Bonferroni	Benjamini	FDR
GOTERM_CC_FAT	GO:0043233~organelle lumen	13	13.2653	0.489093	CYCS, GOLIM4, C1QC, RTN3, CYP27A1, P4HA1, INTS6, P4HA3, THBS1, RCN1, RPS27A, FH, THBS4	82	1820	12782	1.11341	1	0.966987	99.9768
GOTERM_CC_FAT	GO:0031974~membrane-enclosed lumen	13	13.2653	0.518116	CYCS, GOLIM4, C1QC, RTN3, CYP27A1, P4HA1, INTS6, P4HA3, THBS1, RCN1, RPS27A, FH, THBS4	82	1856	12782	1.09182	1	0.970474	99.9888
GOTERM_CC_FAT	GO:0070013~intracellular organelle lumen	11	11.2245	0.706862	CYP27A1, P4HA1, INTS6, P4HA3, CYCS, GOLIM4, C1QC, RPS27A, RCN1, FH, RTN3	82	1779	12782	0.963833	1	0.99204	100
Annotation Cluster 59	Enrichment Score: 0.1986642379976956
Category	Term	Count	%	PValue	Genes	List Total	Pop Hits	Pop Total	Fold Enrichment	Bonferroni	Benjamini	FDR
GOTERM_CC_FAT	GO:0005792~microsome	3	3.06122	0.444892	SNX9, RDH10, MGST1	82	237	12782	1.97314	1	0.957383	99.9347
GOTERM_CC_FAT	GO:0042598~vesicular fraction	3	3.06122	0.45982	SNX9, RDH10, MGST1	82	244	12782	1.91653	1	0.959741	99.9535
GOTERM_CC_FAT	GO:0005624~membrane fraction	5	5.10204	0.762431	SNX9, RDH10, CLEC2D, ABCA1, MGST1	82	809	12782	0.9634	1	0.995178	100
GOTERM_CC_FAT	GO:0005626~insoluble fraction	5	5.10204	0.787168	SNX9, RDH10, CLEC2D, ABCA1, MGST1	82	839	12782	0.928951	1	0.996034	100
GOTERM_CC_FAT	GO:0000267~cell fraction	6	6.12245	0.82712	SNX9, RDH10, CLEC2D, FABP4, ABCA1, MGST1	82	1083	12782	0.86359	1	0.997092	100
Annotation Cluster 60	Enrichment Score: 0.16569582793580295
Category	Term	Count	%	PValue	Genes	List Total	Pop Hits	Pop Total	Fold Enrichment	Bonferroni	Benjamini	FDR
INTERPRO	IPR003599:Immunoglobulin subtype	3	3.06122	0.546892	UNC5A, PECAM1, FCGR3B	93	330	16659	1.62845	1	0.999991	99.9969
SMART	SM00409:IG	3	3.06122	0.628625	UNC5A, PECAM1, FCGR3B	59	330	9079	1.39892	1	0.999883	99.9957
SP_PIR_KEYWORDS	Immunoglobulin domain	3	3.06122	0.689516	UNC5A, PECAM1, FCGR3B	98	470	19235	1.25282	1	0.991372	100
INTERPRO	IPR007110:Immunoglobulin-like	3	3.06122	0.768724	UNC5A, PECAM1, FCGR3B	93	501	16659	1.07263	1	1	100
INTERPRO	IPR013783:Immunoglobulin-like fold	3	3.06122	0.814542	UNC5A, PECAM1, FCGR3B	93	553	16659	0.971767	1	1	100
Annotation Cluster 61	Enrichment Score: 0.07406846377564871
Category	Term	Count	%	PValue	Genes	List Total	Pop Hits	Pop Total	Fold Enrichment	Bonferroni	Benjamini	FDR
SP_PIR_KEYWORDS	DNA binding	3	3.06122	0.513786	PPARG, H3F3A, RBMS1	98	340	19235	1.73184	1	0.956233	99.9918
SP_PIR_KEYWORDS	dna-binding	5	5.10204	0.987791	PPARG, H3F3A, ZEB2, H3F3C, RBMS1	98	1868	19235	0.525363	1	1	100
GOTERM_MF_FAT	GO:0003677~DNA binding	7	7.14286	0.996707	TSC22D3, LMO2, PPARG, H3F3A, ZEB2, H3F3C, RBMS1	78	2331	12983	0.499846	1	1	100
SP_PIR_KEYWORDS	nucleus	11	11.2245	0.999335	LMO2, LGALS3, INTS6, PPARG, H3F3A, FABP4, ZEB2, H3F3C, PPP2R3C, RPS27A, RBMS1	98	4283	19235	0.504093	1	1	100
Annotation Cluster 62	Enrichment Score: 0.05826876293699364
Category	Term	Count	%	PValue	Genes	List Total	Pop Hits	Pop Total	Fold Enrichment	Bonferroni	Benjamini	FDR
GOTERM_BP_FAT	GO:0006468~protein amino acid phosphorylation	4	4.08163	0.76922	PAK3, GMFG, THBS1, CD74	82	667	13528	0.989359	1	0.999888	100
GOTERM_BP_FAT	GO:0016310~phosphorylation	4	4.08163	0.865289	PAK3, GMFG, THBS1, CD74	82	800	13528	0.824878	1	0.999994	100
GOTERM_BP_FAT	GO:0006793~phosphorus metabolic process	4	4.08163	0.937252	PAK3, GMFG, THBS1, CD74	82	973	13528	0.678214	1	1	100
GOTERM_BP_FAT	GO:0006796~phosphate metabolic process	4	4.08163	0.937252	PAK3, GMFG, THBS1, CD74	82	973	13528	0.678214	1	1	100
Annotation Cluster 63	Enrichment Score: 6.705811072562509E-5
Category	Term	Count	%	PValue	Genes	List Total	Pop Hits	Pop Total	Fold Enrichment	Bonferroni	Benjamini	FDR
SP_PIR_KEYWORDS	transcription regulation	3	3.06122	0.999752	BTG2, PPARG, ZEB2	98	2026	19235	0.290635	1	1	100
SP_PIR_KEYWORDS	Transcription	3	3.06122	0.999803	BTG2, PPARG, ZEB2	98	2071	19235	0.28432	1	1	100
GOTERM_BP_FAT	GO:0006350~transcription	3	3.06122	0.999982	BTG2, PPARG, ZEB2	82	2101	13528	0.235567	1	1	100

## Sheet: Upregulated genes in vein
Original row	Name	exSYMBOL	Primary_id	UniGene	ENSEMBL	entrez	symbol	Descr	CHR_LOCATION	PROBE_ID	Expected score (dExp)	Observed score(d)	Numerator(r)	Denominator (s+s0)	Fold change(Unlogged)	Ascending.aorta_1.cexp	Ascending.aorta_2.cexp	Corner.pulmunary.valve_F_1.cexp	Corner.pulmunary.valve_F_2.cexp	Corner.pulmunary.valve_I_1.cexp	Corner.pulmunary.valve_I_2.cexp	Coronary.artery_1.cexp	Coronary.artery_2.cexp	Descending.aorta_1.cexp	Descending.aorta_2.cexp	Inferior.vena.cava_1.cexp	Inferior.vena.cava_2.cexp	Pulmunary.artery_1.cexp	Pulmunary.artery_2.cexp	Superior.vena.cava_1.cexp	Superior.vena.cava_2.cexp	atrumo_left2.exp	atrium_left3.exp	ventr_left1.exp	ventr_left2.exp
2720	pig07576;pig07577	EMP1	ENSSSCT00000000663		ENSSSCG00000000617		A6N1V5_PIG	Epithelial membrane protein 1 [Source:UniProtKB/TrEMBL;Acc:A6N1V5]	chrNA:-1--1	pig07576;pig07577	-0.937564	5.13997	0.435743	0.0847755	1.35311	NaN	10.6632	11.2836	11.6602	11.1484	11.0075	11.237	11.4016	NaN	10.7484	11.0199	11.1454	10.9083	11.7652	11.1555	11.1463	10.9673	10.8584	12.3818	11.5116
9171	pig27679;pig27680		ENSSSCT00000014800		ENSSSCG00000013551		A9LS54_PIG	Complement component C3d Fragment [Source:UniProtKB/TrEMBL;Acc:A9LS54]	chrNA:-1--1	pig27679;pig27680	-0.10695	5.27934	1.73767	0.329146	3.16083	11.1959	11.3292	14.4555	14.7238	13.2453	13.1814	12.1108	12.3312	12.0315	12.3577	13.4264	13.4517	11.9523	12.5158	13.6219	13.365	12.2476	11.8722	11.7111	12.2131
12536	pig37410;pig37411	ABCA1	ENSSSCT00000005966		ENSSSCG00000005423	100152112	ABCA1	ATP-binding cassette sub-family A member 1 (ATP-binding cassette transporter 1)(ATP-binding cassette 1)(ABC-1)(Cholesterol efflux regulatory protein) [Source:UniProtKB/Swiss-Prot;Acc:O95477]	chrNA:-1--1	pig37410;pig37411	0.248941	4.33268	0.938662	0.216647	1.92723	10.6579	10.7068	12.2018	12.4703	11.0798	10.9614	10.9643	11.3024	10.7523	11.1214	11.5541	11.6424	10.788	11.5081	12.1478	11.6487	11.4246	11.2716	12.9432	11.775
15718	pig47757	ACRP30;ADIPOQ;ADN;APM1	Ssc#S38794850	Ssc.18549		397660	ADIPOQ	Adiponectin, C1Q and collagen domain containing	chrNA:-1--1	pig47757	0.630636	8.89872	1.75379	0.197083	3.40396	NaN	10.6104	10.8596	11.0924	NaN	10.6629	11.489	11.7585	NaN	10.6922	12.3107	12.2916	10.6548	11.3216	12.8607	12.5656	11.2484	11.0784	11.3727	10.931
7409	pig22478;pig22479	AMY2B;LOC100153854	ENSSSCT00000007507	Ssc.72786|Ssc.56009	ENSSSCG00000006854	397397|100153854	AMY2B|LOC100153854	Amylase, alpha 2B (pancreatic)|Similar to alpha-amylase	chrNA:-1--1	pig22478;pig22479	-0.297023	11.6842	1.10698	0.094742	2.15637	10.6361	10.6924	NaN	10.8424	13.7924	13.4275	11.2163	11.3353	10.5893	10.6371	11.7023	11.7846	12.024	12.2085	11.6463	11.8495	10.6	10.7318	10.8774	11.1391
225	pig37099;pig37100	ANXA1;LOC100156755	ENSSSCT00000005802|Ssc#S26393648	Ssc.72775|Ssc.73159|Ssc.14559	ENSSSCG00000005267	396942|100156755	ANXA1|LOC100156755	Transcribed locus, strongly similar to NP_001157470.1 annexin A1 [Sus scrofa]|Similar to annexin 1|Annexin A1	chrNA:-1--1	pig37099;pig37100	-1.93323	4.60751	1.22472	0.26581	2.31023	12.1229	11.6179	13.9181	13.4776	13.454	12.7232	12.1933	12.0697	12.4304	11.7882	13.1278	13.0176	12.4739	12.0972	13.587	13.126	13.362	11.0657	NaN	10.6653
12026	pig35901;pig35902	B2M	ENSSSCT00000005169		ENSSSCG00000004682	397033	B2MG_PIG	Beta-2-microglobulin Precursor (Lactollin) [Source:UniProtKB/Swiss-Prot;Acc:Q07717]	chrNA:-1--1	pig35901;pig35902	0.193945	5.12559	1.64371	0.320687	3.28417	13.6955	13.6371	15.6973	15.7624	14.784	14.8806	15.2887	14.4252	13.5328	13.6146	15.6952	15.6973	13.2367	13.2453	14.5587	15.1038	14.5448	14.9226	13.3209	14.6363
13290	pig35903	B2M	ENSSSCT00000005170|ENSSSCT00000005177		ENSSSCG00000004682|ENSSSCG00000004687	397033	B2MG_PIG	Beta-2-microglobulin Precursor (Lactollin) [Source:UniProtKB/Swiss-Prot;Acc:Q07717]	chrNA:-1--1	pig35903	0.332851	6.6204	1.55803	0.235337	2.90065	13.3045	13.971	15.6973	15.7624	15.3637	15.4825	14.1317	14.1924	13.2985	13.7638	15.0148	15.0112	13.7924	13.7879	15.1606	15.3832	12.5983	13.7958	12.6304	12.6976
8333	pig25352;pig25353	NR2F2	ENSSSCT00000002510		ENSSSCG00000002254	100153983	B5A7P0_PIG	Orphan nuclear receptor COUP-TFII [Source:UniProtKB/TrEMBL;Acc:B5A7P0]	chrNA:-1--1	pig25352;pig25353	-0.196154	7.1341	1.08638	0.15228	2.13288	10.7091	10.8223	10.9098	11.1076	11.4533	10.9533	11.4438	11.5545	10.6436	10.8727	11.6633	11.7684	10.964	11.3384	11.8602	12.1013	10.8239	10.9468	10.9948	10.906
15607	pig47041		Ssc#S42528236	Ssc.17286		100048932	BTG2	BTG family, member 2	chrNA:-1--1	pig47041	0.61543	3.90644	0.587665	0.150435	1.502	11.3442	11.4863	11.5218	11.6368	13.589	13.8583	12.493	12.5537	11.2036	11.5462	12.0809	12.0795	11.2594	11.2926	11.775	11.9956	NaN	10.709	10.6202	10.7634
3937	pig11731;pig11732	C1QC	ENSSSCT00000003916	Ssc.53834	ENSSSCG00000003525	445460	C1QC	Complement component 1, q subcomponent, C chain	chrNA:-1--1	pig11731;pig11732	-0.734681	4.1706	1.25907	0.301893	2.44793	10.7737	10.8606	13.3341	13.186	12.5486	12.2187	11.4548	11.8285	10.8628	11.3477	11.7655	11.9625	11.1978	12.1028	12.748	12.4051	11.3201	10.8383	10.9058	10.8921
6893	pig20991;pig20992	CA3	ENSSSCT00000006734		ENSSSCG00000006141	494016	CAH3_PIG	Carbonic anhydrase 3 (EC 4.2.1.1)(Carbonic anhydrase III)(CA-III)(Carbonate dehydratase III) [Source:UniProtKB/Swiss-Prot;Acc:Q5S1S4]	chrNA:-1--1	pig20991;pig20992	-0.354839	10.8837	1.97629	0.181582	3.94346	11.2014	11.0944	10.9179	10.7127	10.989	11.2188	12.5344	12.3082	11.156	10.8048	12.8388	12.9112	11.2381	NaN	13.2938	13.1181	NaN	10.731	10.6012	10.9976
14646	pig40597	CD163	Ssc#S29469955	Ssc.5053		397031	CD163	CD163 molecule	chrNA:-1--1	pig40597	0.492134	9.30793	1.87952	0.201926	3.64509	11.6348	11.4428	13.4292	13.2314	13.971	14.2164	11.6718	11.4869	12.0925	11.7476	13.4695	13.488	12.7919	12.287	13.698	13.7802	10.8763	11.0068	NaN	10.8592
16573	pig53752	CD74	Ssc#S35166632	Ssc.27786		396660	CD74	CD74 antigen	chrNA:-1--1	pig53752	0.754215	7.15797	1.30869	0.18283	2.45658	10.9825	10.9924	12.7049	12.8174	12.0562	11.958	11.3428	11.5622	11.1958	11.5051	12.4839	12.5664	11.1385	11.5474	12.5623	12.2979	11.1517	11.2584	11.0825	12.1571
12987	pig10149	CES1;CES3	ENSSSCT00000003125|ENSSSCT00000003124|ENSSSCT00000003126	Ssc.55239|Ssc.71496	ENSSSCG00000002824|ENSSSCG00000002825	397478|100135666	CES1|CES3|NULL	NULL|Carboxylesterase|Carboxylesterase 1 (monocyte/macrophage serine esterase 1)	chrNA:-1--1	pig10149	0.298982	4.57011	1.08184	0.236722	2.12881	11.3576	11.4332	11.8151	11.9053	12.4665	12.1002	12.0033	12.2645	11.3777	11.8595	12.2479	12.4721	11.4869	11.978	12.6825	12.9528	12.4201	11.9989	10.6809	11.6721
1687	pig03956;pig03957	CH242-37G9.2;LOC100155576	ENSSSCT00000008222	Ssc.74851|Ssc.70639	ENSSSCG00000007507	100155576|100144531	CH242-37G9.2|LOC100155576	Hypothetical protein LOC100155576|Phosphoenolpyruvate carboxykinase 1 (soluble)	chrNA:-1--1	pig03956;pig03957	-1.16561	6.85926	0.95029	0.138541	1.93459	10.9089	10.895	11.6802	11.6544	12.678	12.5301	11.8244	11.8361	10.9239	11.1436	11.7977	12.0599	11.4809	11.3575	11.7892	12.0259	11.0768	11.2183	10.9198	10.8715
1665	pig03868;pig03869	CH242-4C12.4;DPM1	ENSSSCT00000008179	Ssc.6692	ENSSSCG00000007474	100124379	CH242-4C12.4	Dolichyl-phosphate mannosyltransferase polypeptide 1, catalytic subunit	chrNA:-1--1	pig03868;pig03869	-1.17122	4.0116	0.616697	0.153728	1.54502	NaN	10.7814	11.333	11.7683	11.5144	10.8243	11.3416	11.5674	NaN	10.6902	11.3562	11.5896	10.7262	11.7481	11.2752	11.0803	11.1885	10.9885	11.6744	11.7139
2746	pig07682;pig07683	CLEC2D	ENSSSCT00000000713		ENSSSCG00000000657		CLEC2D	C-type lectin domain family 2 member D (Osteoclast inhibitory lectin)(Lectin-like NK cell receptor)(Lectin-like transcript 1)(LLT-1) [Source:UniProtKB/Swiss-Prot;Acc:Q9UHP7]	chrNA:-1--1	pig07682;pig07683	-0.932882	4.26193	1.34247	0.314991	2.60555	10.8087	10.8861	12.4657	12.5493	12.1598	10.8337	11.3104	11.7012	10.7801	11.3331	11.7134	12.1813	10.6978	11.975	12.8441	12.4391	11.4296	11.2201	11.0647	11.8679
6014	pig18197;pig18198	COL1A2	ENSSSCT00000016699	Ssc.72559|Ssc.69912|Ssc.74831|Ssc.24975|Ssc.58413|Ssc.70823|Ssc.74800|Ssc.74810|Ssc.73264|Ssc.70829|Ssc.70712|Ssc.74179|Ssc.53911	ENSSSCG00000015326	733632	COL1A2	Transcribed locus, moderately similar to XP_001516638.1 PREDICTED: similar to type I procollagen pro-alpha 2 chain, partial [Ornithorhynchus anatinus]|Transcribed locus, weakly similar to NP_000080.2 alpha 2 type I collagen precursor [Homo sapiens]|Collagen, type I, alpha 2|Transcribed locus, weakly similar to NP_510110.1 COLlagen family member (col-182) [Caenorhabditis elegans]|Transcribed locus…	chrNA:-1--1	pig18197;pig18198	-0.457473	8.84496	2.36403	0.267274	5.03293	12.7421	12.9941	12.3129	12.3577	14.2271	13.4889	13.2869	13.971	13.2465	13.6791	15.6952	15.6973	13.2576	14.1679	15.3882	15.3372	13.607	13.037	11.4096	11.8062
15211	pig44676	COL6A3	Ssc#S46876336	Ssc.12068		100101551	COL6A3	Collagen, type VI, alpha 3	chrNA:-1--1	pig44676	0.563501	3.84984	0.798018	0.207286	1.71589	13.6146	13.1152	11.7026	11.6507	12.8912	13.3193	12.8024	12.5851	13.8272	13.454	14.4169	14.3806	14.2164	13.4442	14.1497	14.256	12.3469	12.9946	11.5712	13.2349
10526	pig31617;pig31618		ENSSSCT00000013101	Ssc.16132	ENSSSCG00000011973	397430	COL8A1	Collagen, type VIII, alpha 1	chrNA:-1--1	pig31617;pig31618	0.0353667	5.71882	1.04875	0.183386	2.07971	10.9741	10.941	11.3389	11.2908	10.8439	10.9739	11.5286	11.3423	10.6719	10.7275	12.0507	12.067	10.7867	NaN	11.5766	11.8152	NaN	10.6224	NaN	10.5894
13845	pig24403;pig24404	CTSH	ENSSSCT00000001985|ENSSSCT00000001984|ENSSSCT00000001983|ENSSSCT00000001982	Ssc.3593	ENSSSCG00000001770	396969	CTSH|CATH_PIG	Cathepsin H|Cathepsin H Precursor (EC 3.4.22.16) [Contains Cathepsin H mini chain;Cathepsin H heavy chain;Cathepsin H light chain] [Source:UniProtKB/Swiss-Prot;Acc:O46427]	chrNA:-1--1	pig24403;pig24404	0.396329	5.04915	1.05178	0.208309	2.07473	12.3963	12.2004	15.1726	14.4897	13.3075	13.2922	12.4568	12.0643	12.7358	12.4165	13.6743	13.5598	13.0163	12.3303	13.5842	13.1379	11.066	11.2536	11.1694	11.7791
7262	pig22043;pig22044		ENSSSCT00000007283	Ssc.1020	ENSSSCG00000006647	397569	CTSK	Cathepsin K	chrNA:-1--1	pig22043;pig22044	-0.313524	5.13462	0.87048	0.169532	1.84523	14.1679	14.0291	14.8476	14.838	14.8719	14.7991	13.454	13.3475	14.1076	14.21	14.8228	14.8294	14.1818	13.935	15.0187	15.3256	10.6272	10.8974	NaN	NaN
17756	pig66952	CYBRD1;CYTB	Ssc#S35173837	Ssc.43889		100144591	CYBRD1	Cytochrome b reductase 1	chrNA:-1--1	pig66952	0.956167	9.9758	1.78174	0.178607	3.46149	10.9468	11.0484	12.0007	12.2048	11.4188	11.6416	11.442	11.612	10.993	11.2483	12.8377	12.6279	11.137	11.1765	13.1631	12.7347	12.1228	12.095	11.0121	10.8907
702	pig00700;pig00701		ENSSSCT00000018195	Ssc.50553	ENSSSCG00000016714	100170131	CYCS	Cytochrome c, somatic	chrNA:-1--1	pig00700;pig00701	-1.52265	3.96973	0.855595	0.21553	1.80284	NaN	10.7999	11.9799	12.3357	11.3704	11.0488	12.6036	12.6879	10.8496	11.367	11.7464	12.1077	10.71	11.4006	11.597	11.933	11.1571	11.2163	14.9174	15.331
14513	pig39964	CYP27A1	Ssc#S35167008	Ssc.3804		100126282	CYP27A1	Cytochrome P450, family 27, subfamily A, polypeptide 1	chrNA:-1--1	pig39964	0.475891	5.14983	0.770364	0.14959	1.70689	12.2261	12.3783	10.6477	10.8324	12.2089	12.0387	11.8837	11.9957	12.1715	12.476	13.1706	13.203	12.2346	12.4557	12.8597	13.1	11.5272	12.4124	11.1894	12.6633
14213	pig38601;pig38602	A-FABP;AP2;FABP4	Ssc#S46879512	Ssc.1089		399533	FABP4	Fatty acid binding protein 4, adipocyte	chrNA:-1--1	pig38601;pig38602	0.439655	16.1954	2.00276	0.123663	3.993	13.7755	13.7173	15.6973	15.7624	10.9319	10.7512	15.2887	15.3168	13.4497	13.7517	15.6952	15.6973	13.4984	13.6291	15.6135	15.6993	12.075	12.6291	11.2604	13.6239
15673	pig47521	FASN	Ssc#S38794848	Ssc.18175		397561	FASN	Fatty acid synthase	chrNA:-1--1	pig47521	0.624361	5.74323	1.7103	0.297794	3.13561	10.8044	11.0128	11.0969	11.1857	11.1394	11.1624	11.9285	12.1082	11.5954	11.8714	13.102	13.1181	11.5618	11.9866	12.9418	12.9634	10.9732	11.236	10.954	11.0058
14148	pig38379;pig38380	FCGR3;FCGR3B	Ssc#S20116214	Ssc.167		397684	FCGR3B	Fc fragment of IgG, low affinity IIIb, receptor (CD16b)	chrNA:-1--1	pig38379;pig38380	0.431904	7.15312	1.64063	0.229358	3.18685	12.4709	12.2765	15.2367	15.3703	13.9037	14.1143	12.0983	12.001	12.3455	12.4934	13.7573	13.8291	12.4819	12.2752	14.0222	14.5401	10.6003	10.7541	10.8753	11.1894
1781	pig04294;pig04295	FH	ENSSSCT00000011918	Ssc.864	ENSSSCG00000010893	397525	FH	Fumarate hydratase	chrNA:-1--1	pig04294;pig04295	-1.14053	6.90414	0.982004	0.142234	1.98113	11.0308	11.0967	11.1003	11.0856	12.6139	12.3693	11.396	11.1927	11.1408	11.276	11.96	12.1024	11.8173	11.2508	12.0631	12.3469	10.8965	10.5973	11.0794	11.1718
13453	pig04296;pig04297		ENSSSCT00000011917|ENSSSCT00000011918	Ssc.864	ENSSSCG00000010893	397525	FH|Q8MI72_PIG	Complement regulator factor H Precursor [Source:UniProtKB/TrEMBL;Acc:Q8MI72]|Fumarate hydratase	chrNA:-1--1	pig04296;pig04297	0.351024	4.96055	0.760605	0.153331	1.70018	10.8351	10.832	10.7519	10.7577	11.9431	11.8182	10.994	10.7026	10.9505	11.07	11.7726	11.7664	11.2611	NaN	11.4064	11.7845	NaN	NaN	NaN	10.6788
9931	pig29936;pig29937	GALNTL2;LOC100157572	ENSSSCT00000012260		ENSSSCG00000011195	100157572	GALNTL2	Polypeptide N-acetylgalactosaminyltransferase-like protein 2 (EC 2.4.1.41)(Polypeptide GalNAc transferase-like protein 2)(pp-GaNTase-like protein 2)(GalNAc-T-like protein 2)(Protein-UDP acetylgalactosaminyltransferase-like protein 2)(UDP-GalNAc:polypeptide N-acetylgalactosaminyltransferase-like protein 2) [Source:UniProtKB/Swiss-Prot;Acc:Q8N3T1]	chrNA:-1--1	pig29936;pig29937	-0.0268786	4.631	1.27034	0.274311	2.50511	NaN	NaN	10.7639	10.8211	10.7467	10.6868	10.9437	11.216	NaN	10.8011	11.6526	11.7068	10.7458	11.4834	12.587	12.3039	11.3118	11.1023	11.6976	11.2194
7447	pig22637;pig22638		ENSSSCT00000007584	Ssc.53745|Ssc.69961	ENSSSCG00000006924	100151938|100147807	GBP1|LOC100151938	Similar to guanylate binding protein 1|Guanylate binding protein 1, interferon-inducible, 67kDa	chrNA:-1--1	pig22637;pig22638	-0.292745	6.61003	1.05505	0.159614	2.0768	NaN	NaN	13.0117	13.1964	11.6265	11.5712	11.0303	11.222	10.7948	11.14	11.8981	12.046	NaN	10.9777	12.2362	12.2063	NaN	NaN	10.8124	11.1064
11463	pig34242;pig34243	GMFG	ENSSSCT00000011711		ENSSSCG00000010705		GMFG	Glia maturation factor gamma (GMF-gamma) [Source:UniProtKB/Swiss-Prot;Acc:O60234]	chrNA:-1--1	pig34242;pig34243	0.133971	5.35887	1.08348	0.202184	2.12885	11.0407	11.1748	14.8719	14.9226	13.0053	12.5547	11.3743	11.4684	10.9519	11.3908	12.0146	12.0142	11.2431	11.5457	12.3541	12.5092	10.7515	10.7667	10.997	10.8963
9442	pig28457;pig28458	IFI30	ENSSSCT00000015187	Ssc.53751	ENSSSCG00000013901	100174943	IFI30	Interferon, gamma-inducible protein 30	chrNA:-1--1	pig28457;pig28458	-0.0786911	3.84884	0.750738	0.195056	1.70645	10.6923	10.7929	12.3188	12.3776	11.0849	10.6594	11.0921	11.3991	NaN	10.9036	11.4487	11.5073	10.7258	11.4501	11.9464	11.2711	11.026	10.9221	10.904	10.8926
14134	pig38353	IGFBP2	Ssc#S20116707	Ssc.47		397064	IGFBP2	Insulin-like growth factor binding protein 2	chrNA:-1--1	pig38353	0.430261	6.67749	1.49023	0.223172	2.85101	12.3188	12.2439	11.6835	11.6456	13.3591	13.2409	13.7778	13.6743	11.9697	12.1407	13.3341	13.454	12.2451	12.3051	13.8127	14.0332	11.0938	11.4548	11.5214	11.8911
15364	pig45968;pig45969	IGFBP6	Ssc#S35173658	Ssc.14062		100101923	IGFBP6	Insulin-like growth factor binding protein 6	chrNA:-1--1	pig45968;pig45969	0.58327	7.74605	2.97119	0.383574	7.42308	10.7275	12.0922	11.5297	11.5448	11.6196	11.8203	12.6222	12.9516	11.3494	11.9615	14.58	14.7238	13.4059	14.1105	14.5756	14.136	15.1985	15.2967	12.8049	12.0921
7714	pig23456;pig23457	KIAA1949;LOC100156390	ENSSSCT00000001499	Ssc.69798|Ssc.73577	ENSSSCG00000001377	100156390|100151743	KIAA1949|LOC100156390	Similar to KIAA1949 protein|Phostensin	chrNA:-1--1	pig23456;pig23457	-0.262999	3.97467	0.568627	0.143063	1.48494	13.0661	12.9792	13.1	13.3527	12.5418	12.3541	12.9491	13.2869	12.9528	13.2295	13.7321	13.7778	12.5475	13.1152	13.4916	13.5007	12.5544	12.5742	11.9945	15.0504
12271	pig36657;pig36658	LGALS3	ENSSSCT00000005572	Ssc.54122	ENSSSCG00000005055	100038033	LGALS3	Lectin, galactoside-binding, soluble, 3	chrNA:-1--1	pig36657;pig36658	0.220241	6.52595	1.54555	0.236832	2.97504	11.9793	12.1177	14.7435	14.9748	12.9903	12.644	11.6868	11.766	11.9439	12.2494	13.2134	13.4229	13.2658	13.6955	13.9181	13.9181	11.5579	11.5431	11.0152	10.9978
11270	pig33702;pig33703	LIPA	ENSSSCT00000011436	Ssc.40304|Ssc.57691	ENSSSCG00000010450	100142668	LIPA	Transcribed locus|Lipase A	chrNA:-1--1	pig33702;pig33703	0.113689	4.54323	1.58024	0.347824	3.02975	11.3669	11.4952	14.5112	14.727	13.5401	13.1844	11.8201	11.9802	11.8908	12.2026	12.9112	12.926	12.0998	12.2335	13.6178	13.8216	11.0892	11.1099	11.4775	11.5636
307	pig43377;pig43378	LOC100049692	Ssc#S35164113|ENSSSCT00000011219	Ssc.9778	ENSSSCG00000010249	100049692	LOC100049692	Proteoglycan 1 precursor-like	chrNA:-1--1	pig43377;pig43378	-1.82601	5.30827	1.87956	0.354081	3.62883	11.0773	11.0511	15.6973	15.4305	13.8662	13.8338	12.8123	12.5475	12.0524	11.3156	13.3991	13.7039	11.9304	11.6585	13.1646	12.747	12.3305	12.6927	10.9449	12.583
15026	pig43376	LOC100049692	Ssc#S35164113	Ssc.9778		100049692	LOC100049692	Proteoglycan 1 precursor-like	chrNA:-1--1	pig43376	0.539527	7.61223	2.56185	0.336543	5.71724	11.2564	11.4629	15.6973	15.7624	15.2136	15.3032	12.5256	12.3702	12.4132	11.7673	14.0541	14.1224	12.7617	12.6018	14.7026	14.268	13.0607	13.5085	10.7263	12.3252
15902	pig48771;pig48772	LOC100127171	Ssc#S41658118	Ssc.20399		100127171	LOC100127171	Cell death-inducing DNA fragmentation factor-like effector a	chrNA:-1--1	pig48771;pig48772	0.655919	4.35125	1.20916	0.277889	2.3863	NaN	10.6003	NaN	10.799	10.6101	NaN	10.7247	11.2683	NaN	10.586	11.5954	11.5444	NaN	11.009	12.4679	12.1117	11.1888	11.1281	11.0323	10.7464
14144	pig38371		Ssc#S35169156	Ssc.137		100135052	LOC100135052	Ficolin alpha	chrNA:-1--1	pig38371	0.431417	11.5048	1.64111	0.142645	3.13031	11.1844	11.1929	11.1717	11.3232	10.6489	10.7173	10.7179	NaN	11.0204	11.2258	12.8658	12.9054	10.9424	10.7726	12.5408	12.8761	10.7504	10.7277	NaN	11.0384
11648	pig34757;pig34758		ENSSSCT00000004594	Ssc.9565	ENSSSCG00000004156	100152238	LOC100152238	Similar to Interferon gamma receptor 1	chrNA:-1--1	pig34757;pig34758	0.15398	5.38121	1.22586	0.227803	2.305	10.6739	10.7581	12.0282	12.3592	12.432	12.2362	11.4878	11.5661	10.9933	11.3982	12.0115	12.0654	11.0526	11.571	12.343	12.307	NaN	10.6116	NaN	10.8231
2899	pig08251;pig08252	LOC100152607;LUM	ENSSSCT00000001000	Ssc.1128	ENSSSCG00000000916	100152607	LOC100152607	Similar to lumican	chrNA:-1--1	pig08251;pig08252	-0.904516	6.00797	2.7461	0.457077	6.40411	11.3169	11.9192	12.1914	12.517	15.4062	15.2774	12.9543	13.2134	12.512	12.8966	14.4669	14.585	13.1765	13.8472	15.2136	15.3637	11.9467	12.1433	10.9292	11.0582
12002	pig35827;pig35828		ENSSSCT00000005132	Ssc.24406	ENSSSCG00000004647	100153076	LOC100153076	Similar to DTW domain containing 1	chrNA:-1--1	pig35827;pig35828	0.191354	4.6263	0.678472	0.146655	1.60418	10.7581	10.8076	10.8418	11.1008	11.2888	11.1311	11.1677	11.3593	10.6595	10.949	11.3977	11.3735	10.8711	11.5378	11.7159	11.4009	10.6193	10.6437	10.7217	10.8573
7263	pig22045;pig22046	CTSS;LOC100153090	ENSSSCT00000007284	Ssc.55494	ENSSSCG00000006648	100153090	LOC100153090	Similar to Cathepsin S	chrNA:-1--1	pig22045;pig22046	-0.313419	5.28386	1.5132	0.286382	2.95789	11.7577	11.9451	15.6973	15.7624	14.4669	14.4133	12.0125	11.8479	11.9407	12.0922	13.0038	13.1356	12.1949	12.0999	13.6473	14.0019	10.9293	11.0282	11.0921	11.4747
13807	pig23701;pig23702	LOC100153136;SBAB-591C4.1;SLA-DRB1	ENSSSCT00000001613|ENSSSCT00000001612|ENSSSCT00000001615|ENSSSCT00000001614	Ssc.72101|Ssc.71805|Ssc.71196|Ssc.16169	ENSSSCG00000001455	100153136	LOC100153136	MHC class II SLA-DRB1-8 mRNA, exon 2|Similar to MHC class II antigen	chrNA:-1--1	pig23701;pig23702	0.391877	4.99302	0.603837	0.120936	1.52007	10.5917	10.7042	11.3796	11.6101	NaN	NaN	10.8841	11.0842	NaN	10.8411	11.3	11.4265	10.7706	11.2571	11.3379	11.1617	11.0481	11.0152	12.2467	11.618
11489	pig34298;pig34299	CPXM2;LOC100153578	ENSSSCT00000011739	Ssc.28479	ENSSSCG00000010728	100153578	LOC100153578	Similar to Carboxypeptidase-like protein X2	chrNA:-1--1	pig34298;pig34299	0.136764	4.24871	0.583561	0.13735	1.49847	11.8648	11.9259	11.1669	11.2905	11.2945	11.5058	11.397	11.4083	11.6543	11.9352	12.432	12.5377	11.9116	11.7336	12.2457	12.499	11.2649	11.1841	11.3138	11.3769
1429	pig03082;pig03083	LOC100155390	ENSSSCT00000007760	Ssc.10133	ENSSSCG00000007088	100155390	LOC100155390	Similar to Sorting nexin 5	chrNA:-1--1	pig03082;pig03083	-1.23711	4.25748	1.2644	0.296984	2.36157	NaN	11.0987	12.424	12.9354	12.7067	12.5623	12.1515	12.1182	11.7251	12.1085	12.6546	12.8947	11.5206	12.2592	12.702	13.2641	10.6868	NaN	10.7862	12.5224
1424	pig03058;pig03059	LOC100155396	ENSSSCT00000007748	Ssc.24145	ENSSSCG00000007077	100155396	LOC100155396	Similar to ABT1-associated protein	chrNA:-1--1	pig03058;pig03059	-1.2387	4.29615	0.575322	0.133916	1.4972	NaN	10.6439	11.119	11.47	11.5742	10.7247	11.1717	11.4376	NaN	10.7366	11.1516	11.4957	NaN	11.4227	11.3727	11.1534	11.662	11.5271	14.0083	12.4531
6835	pig20833;pig20834	LOC100156785;NCALD	ENSSSCT00000006648	Ssc.56169	ENSSSCG00000006059	100156785	LOC100156785	Similar to Neurocalcin-delta	chrNA:-1--1	pig20833;pig20834	-0.361398	3.92993	0.512985	0.130533	1.43097	NaN	10.6209	11.3496	11.378	10.6632	10.6198	11.3439	11.4782	NaN	10.8014	11.2614	11.3734	10.8627	11.5076	11.2272	11.0149	11.3626	11.3005	13.0504	11.8016
6928	pig21111;pig21112	ARFGEF1;LOC100156861	ENSSSCT00000006796	Ssc.14317	ENSSSCG00000006201	100156861	LOC100156861	Similar to guanine nucleotide-exchange protein	chrNA:-1--1	pig21111;pig21112	-0.350823	4.34459	0.566612	0.130418	1.47998	10.7222	10.7904	11.3059	11.4158	10.6799	10.6443	11.1751	11.3124	10.7325	10.9962	11.3696	11.5058	10.7682	11.3857	11.4005	11.2319	10.959	10.8171	11.0792	11.3307
11450	pig34208;pig34209	LOC100157013;SEC23IP	ENSSSCT00000011691	Ssc.58908	ENSSSCG00000010690	100157013	LOC100157013	Similar to SEC23-interacting protein (p125)	chrNA:-1--1	pig34208;pig34209	0.132552	3.90888	0.662362	0.169451	1.57912	10.9252	10.8054	12.2556	12.2332	11.0634	11.0573	11.8575	12.1279	10.8964	11.2415	11.6899	11.7488	10.9183	11.4165	11.6861	11.3932	11.2542	11.2262	10.973	12.6686
11260	pig33676;pig33677	ATAD1;LOC100157471	ENSSSCT00000011423	Ssc.20972	ENSSSCG00000010438	100157471	LOC100157471	Similar to ATPase family, AAA domain containing 1	chrNA:-1--1	pig33676;pig33677	0.112635	3.88305	0.805272	0.207381	1.75148	10.7005	10.9583	11.5019	11.664	11.3545	11.1648	11.6248	11.6428	10.9802	11.2271	11.8149	12.0687	11.1185	11.7281	11.7215	11.482	12.8607	13.8108	11.103	14.3941
10488	pig31515;pig31516	CCDC80;LOC100157590	ENSSSCT00000013052	Ssc.53881	ENSSSCG00000011928	100157590	LOC100157590	Similar to MGC159613 protein	chrNA:-1--1	pig31515;pig31516	0.0312313	8.66986	2.22665	0.256826	4.5518	12.2598	12.285	11.2629	11.4988	13.4969	13.2964	12.7158	12.923	12.7421	13.1097	14.7026	14.7496	12.8607	13.3139	14.9514	14.8995	12.1886	12.3859	11.118	11.0957
15111	pig44060	LOC100157756	Ssc#S46875914	Ssc.10965		100157756	LOC100157756	Similar to Transcription factor MafB (V-maf musculoaponeurotic fibrosarcoma oncogene homolog B)	chrNA:-1--1	pig44060	0.55037	4.31124	0.945483	0.219307	1.89838	11.1334	11.2956	13.9786	14.2164	11.803	12.2069	11.5172	11.5222	11.4945	11.8633	12.541	12.4341	11.7939	11.8544	12.1859	12.4078	NaN	10.6323	NaN	NaN
6848	pig20873;pig20874	HRSP12;LOC100158002	ENSSSCT00000006670	Ssc.8236	ENSSSCG00000006079	100158002	LOC100158002	Similar to Heat-responsive protein 12	chrNA:-1--1	pig20873;pig20874	-0.359914	4.23185	0.81588	0.192795	1.75133	10.9269	11.0489	12.2598	12.6708	12.3674	11.9762	11.6104	11.7348	11.0634	11.4739	11.7846	11.8301	11.2531	11.6334	11.9947	12.1672	10.8364	10.7965	11.2459	11.2001
9063	pig27415;pig27416	LOC396877	ENSSSCT00000014662	Ssc.11074	ENSSSCG00000013418	396877	LOC396877	Complement factor D	chrNA:-1--1	pig27415;pig27416	-0.118371	8.63501	3.05727	0.354055	7.85897	11.123	11.2443	12.8216	13.0401	13.6457	13.4761	14.0437	14.3546	11.9625	12.364	14.8757	14.8953	13.2421	13.838	14.5931	14.5587	11.9543	12.0485	12.3066	12.5486
6026	pig18243	LOC595121	ENSSSCT00000016726	Ssc.56037|Ssc.58431	ENSSSCG00000015352	595121	LOC595121	Transcribed locus, strongly similar to XP_418690.1 PREDICTED: similar to ARL gene 4 [Gallus gallus]|ADP-ribosylation factor-like protein 4A	chrNA:-1--1	pig18243	-0.456068	3.99769	1.02602	0.256652	2.00572	10.7704	11.1307	11.2326	11.4976	12.2711	12.0177	11.482	11.6058	11.1586	11.6474	11.9064	12.1701	11.2584	12.0205	12.4122	12.3225	11.4438	11.466	12.6876	11.8946
18575	pig75118	LOC780407	Ssc#S50207855	Ssc.53847		780407	LOC780407	Chemokine ligand 24-like protein	chrNA:-1--1	pig75118	1.13485	3.95472	0.964879	0.243982	2.00391	NaN	10.6714	10.6566	11.0983	11.0225	10.9476	10.8489	10.9396	10.661	10.6049	11.985	11.9005	10.7701	10.8982	11.5214	11.1257	11.7181	12.0977	11.2048	11.1414
6914	pig21059;pig21060	LY96	ENSSSCT00000006769	Ssc.25550	ENSSSCG00000006175	100125555	LY96	Lymphocyte antigen 96	chrNA:-1--1	pig21059;pig21060	-0.35245	4.28741	1.18002	0.27523	2.22056	NaN	10.6325	12.1291	12.2305	12.2215	11.1917	11.6111	11.9476	10.8696	11.5493	11.9267	12.1772	10.9673	11.9832	12.4714	12.0545	11.5387	11.2531	12.4091	11.6173
18459	pig73193;pig73194	MGST1	Ssc#S35167446	Ssc.51886		397567	MGST1	Microsomal glutathione S-transferase 1	chrNA:-1--1	pig73193;pig73194	1.10707	7.64386	1.81028	0.236828	3.59218	10.6449	10.6614	12.6916	12.9758	11.704	11.8483	12.1846	12.4947	10.683	10.7697	12.8572	12.6755	11.073	11.0927	12.4896	11.9778	12.2734	12.855	11.7423	12.0476
13812	pig23728;pig23729	PSMB9;SBAB-554F3.3	ENSSSCT00000001632|ENSSSCT00000001631	Ssc.12758	ENSSSCG00000001468	654294	NP_001033050.1|SBAB-554F3.3	Proteasome (prosome, macropain) subunit, beta type, 9 (large multifunctional peptidase 2)|proteasome beta 9 subunit [Source:RefSeq peptide;Acc:NP_001033050]	chrNA:-1--1	pig23728;pig23729	0.39243	4.09723	0.664379	0.162153	1.57959	10.9675	11.175	12.3489	12.6287	11.9368	11.4464	11.4846	11.5134	10.9664	11.3631	11.6247	11.7234	11.2028	11.3907	11.8506	11.9308	10.8822	10.9105	11.3541	11.5618
13972	pig30703;pig30704		ENSSSCT00000012647|ENSSSCT00000012648	Ssc.21815	ENSSSCG00000011557	100127161	NP_001106159.1|CIDEC	Cell death-inducing DFFA-like effector c|cell-death-inducing DNA-fragmentation-factor-like effector C [Source:RefSeq peptide;Acc:NP_001106159]	chrNA:-1--1	pig30703;pig30704	0.411142	5.99179	1.36967	0.228592	2.57393	10.81	10.6905	11.0271	10.6745	10.784	10.9774	11.7068	11.5376	11.0317	NaN	12.2235	12.1384	10.9483	NaN	12.675	12.3019	NaN	NaN	NaN	10.6741
8800	pig26674;pig26675		ENSSSCT00000014285		ENSSSCG00000013069		NULL	NULL	chrNA:-1--1	pig26674;pig26675	-0.146611	3.82095	0.856695	0.22421	1.79315	11.3465	11.2147	12.4503	12.6526	12.3175	11.9352	12.146	12.204	11.4384	11.8995	12.3662	12.5046	11.4435	11.4977	12.0463	12.4088	NaN	NaN	10.6033	12.263
3168	pig09334;pig09335		ENSSSCT00000009947		ENSSSCG00000009081		NULL	NULL	chrNA:-1--1	pig09334;pig09335	-0.857161	3.82314	1.86482	0.487772	3.24199	10.9883	10.9692	12.2944	12.2622	13.2951	12.6695	12.7592	12.901	12.3783	12.5289	13.5664	13.8856	12.2305	12.6252	13.3175	13.5545	11.2592	11.6043	10.7772	13.5808
3761	pig11170;pig11171		ENSSSCT00000003637		ENSSSCG00000003275		NULL	NULL	chrNA:-1--1	pig11170;pig11171	-0.760815	3.9646	1.05203	0.265356	2.13427	NaN	10.6148	12.5522	12.6953	12.0189	10.9162	10.8471	11.2153	NaN	10.946	11.4142	11.6748	10.8555	11.7736	12.3961	11.9267	10.8462	10.622	NaN	NaN
3322	pig09863		ENSSSCT00000002984		ENSSSCG00000002691		NULL	NULL	chrNA:-1--1	pig09863	-0.831433	3.98567	0.571322	0.143344	1.47878	10.6159	10.943	11.3253	11.4719	11.0424	10.8556	11.3395	11.6174	NaN	11.0186	11.2933	11.4507	10.933	11.7926	11.4483	11.4378	11.3908	11.2319	13.7155	12.3252
1959	pig04931;pig04932		ENSSSCT00000018279		ENSSSCG00000016791		NULL	NULL	chrNA:-1--1	pig04931;pig04932	-1.09787	4.06196	0.754928	0.185853	1.69011	10.6037	10.8153	11.6529	11.9488	10.9948	10.6353	11.3921	11.6906	NaN	11.059	11.483	11.7881	10.6633	11.7809	11.6944	11.3215	11.0203	10.7165	10.6852	12.8788
12944	pig05201		ENSSSCT00000018416|ENSSSCT00000018411		ENSSSCG00000016905|ENSSSCG00000016910		NULL	NULL	chrNA:-1--1	pig05201	0.294056	4.19034	1.34127	0.320086	2.43292	10.7541	11.1737	11.0586	11.4457	12.6104	11.8185	12.1886	12.7446	11.2377	11.9754	12.3518	12.7085	11.1507	12.2375	12.8504	12.5952	11.1816	11.0055	11.5659	12.273
12925	pig04434		ENSSSCT00000011981|ENSSSCT00000011983	Ssc.56416|Ssc.54235	ENSSSCG00000010946|ENSSSCG00000010948		NULL	NULL|Transcribed locus, strongly similar to NP_999057.1 cathepsin L precursor [Sus scrofa]|Transcribed locus, moderately similar to NP_666023.1 cathepsin L1 preproprotein [Homo sapiens]	chrNA:-1--1	pig04434	0.292035	4.50975	0.628466	0.139357	1.54851	NaN	10.6044	13.3139	13.9085	11.7436	11.4331	10.8595	11.0388	NaN	10.7852	11.2909	11.4691	10.6008	11.3467	11.2577	11.5721	NaN	NaN	10.6657	10.8797
460	pig78622		Ssc#S19548565|ENSSSCT00000000574	Ssc.58935	ENSSSCG00000000532		NULL	Transcribed locus|NULL	chrNA:-1--1	pig78622	-1.68067	4.72117	0.771833	0.163483	1.70924	NaN	10.7434	11.4238	11.5609	12.1352	12.1589	10.9979	11.0888	10.8036	10.8104	11.5366	11.5051	10.8436	10.911	11.8903	11.6097	11.2998	11.7013	11.4019	10.9133
3411	pig10121;pig10122		ENSSSCT00000003110		ENSSSCG00000002810		NULL	NULL	chrNA:-1--1	pig10121;pig10122	-0.81683	5.4502	0.94063	0.172586	1.9078	13.9569	14.2164	14.653	14.8581	14.6752	14.5655	15.2887	15.3168	13.9199	14.3859	14.8953	15.0341	13.8127	14.6491	15.1277	15.1847	11.0247	10.8499	10.6078	13.166
1212	pig02377		ENSSSCT00000019420		ENSSSCG00000017844		NULL	NULL	chrNA:-1--1	pig02377	-1.3056	5.53589	1.27895	0.231029	2.47279	12.0917	12.1158	13.8234	14.1764	13.0201	12.8059	14.0249	13.7321	11.8392	12.0587	13.3433	13.7173	12.6154	12.0413	12.8642	13.2964	13.5718	12.5271	NaN	15.4396
5119	pig15452;pig15453		ENSSSCT00000013366		ENSSSCG00000012220		NULL	NULL	chrNA:-1--1	pig15452;pig15453	-0.569783	5.6184	1.17606	0.209323	2.27453	11.0277	10.9837	12.5301	12.855	11.3296	11.0987	11.7925	12.0411	10.7943	11.2513	12.3168	12.4908	10.7248	11.2649	11.877	12.0768	11.1041	11.0274	10.5982	12.3761
11823	pig35274;pig35275		ENSSSCT00000004852		ENSSSCG00000004389		NULL	NULL	chrNA:-1--1	pig35274;pig35275	0.172321	5.96723	1.44668	0.242437	2.69559	12.3653	12.2601	13.5645	13.9685	13.2093	13.0091	13.7015	14.0409	12.6042	12.996	14.2007	14.1717	12.1235	12.7421	13.898	13.7419	11.1677	11.171	11.2115	12.4549
7410	pig22480;pig22481		ENSSSCT00000007508		ENSSSCG00000006855	100152255|100154664	NULL	NULL	chrNA:-1--1	pig22480;pig22481	-0.296941	6.01166	1.48259	0.246619	2.85504	10.9448	10.9972	10.6643	10.8109	13.924	13.6011	11.7066	11.8238	10.8971	11.2344	12.1762	12.2153	12.043	12.2752	12.6546	12.9577	10.7414	10.7137	10.7881	11.4484
5256	pig15927;pig15928		ENSSSCT00000013619		ENSSSCG00000012453		NULL	NULL	chrNA:-1--1	pig15927;pig15928	-0.551957	6.99843	1.25641	0.179528	2.37332	10.7729	10.8047	11.2451	11.4647	12.4069	12.1377	11.3822	11.4984	10.7905	11.2497	12.028	12.1191	11.0367	11.5273	12.1429	12.3536	10.7196	10.7365	11.1756	11.2169
9660	pig29067;pig29068		ENSSSCT00000015490		ENSSSCG00000014178		NULL	NULL	chrNA:-1--1	pig29067;pig29068	-0.0557404	6.99852	0.926201	0.132342	1.89681	13.587	13.5451	14.2807	14.6134	13.6648	13.3029	15.2887	15.3168	13.3991	13.7444	14.6079	14.4939	13.2331	13.6371	14.3634	14.5154	11.5063	11.4676	11.3749	13.9331
11724	pig34984;pig34985	LOC100157326	ENSSSCT00000004710		ENSSSCG00000004261	100157326	NULL	NULL	chrNA:-1--1	pig34984;pig34985	0.161953	7.49139	0.905102	0.120819	1.8725	13.7552	13.5733	13.6166	13.6548	13.607	13.3546	13.8108	14.4705	13.5598	13.7535	14.519	14.5448	13.3287	14.0182	14.7181	14.4803	14.4976	13.4337	14.314	14.4169
14027	pig33360;pig33361	P4HA1	ENSSSCT00000011265|ENSSSCT00000011264	Ssc.52420|Ssc.7258	ENSSSCG00000010292	396604|100037299	P4HA1	Procollagen-proline, 2-oxoglutarate 4-dioxygenase (proline 4-hydroxylase), alpha polypeptide I	chrNA:-1--1	pig33360;pig33361	0.417694	6.193	1.10881	0.179043	2.16856	10.6495	10.7649	11.3061	11.4285	11.0922	10.9614	11.047	11.3212	10.629	10.9487	11.6894	11.7824	10.6476	11.3869	12.187	11.7685	11.5549	11.2399	12.1912	11.2189
5690	pig17224;pig17225	P4HA3	ENSSSCT00000016192		ENSSSCG00000014840		P4HA3	Prolyl 4-hydroxylase subunit alpha-3 Precursor (EC 1.14.11.2)(4-PH alpha-3)(Procollagen-proline,2-oxoglutarate-4-dioxygenase subunit alpha-3) [Source:UniProtKB/Swiss-Prot;Acc:Q7Z4N8]	chrNA:-1--1	pig17224;pig17225	-0.497601	3.83654	0.490407	0.127825	1.40096	10.9462	10.9342	11.7408	11.7057	11.3512	10.9032	11.7334	11.9407	10.8707	11.199	11.3599	11.516	11.1971	11.4522	11.506	11.5299	10.5869	10.5917	10.8822	10.9327
331	pig46260	LOC100158147;PCCB	Ssc#S23213492|Ssc#S35165277|ENSSSCT00000012757	Ssc.14535|Ssc.73047	ENSSSCG00000011653	100158147|396935	PCCB|LOC100158147	Similar to Propionyl-CoA carboxylase beta chain|Propionyl Coenzyme A carboxylase, beta polypeptide	chrNA:-1--1	pig46260	-1.79836	5.80668	0.592624	0.102059	1.50584	11.1191	11.1519	11.9181	12.0285	11.371	11.3415	11.3678	11.4556	11.0474	11.2901	11.7387	11.6985	11.0972	11.2186	11.7258	11.816	NaN	10.6381	10.8966	11.5192
10308	pig30998;pig30999	LOC100156529;PCOLCE2	ENSSSCT00000012791		ENSSSCG00000011683	100156529	PCOLCE2	Procollagen C-endopeptidase enhancer 2 Precursor (Procollagen COOH-terminal proteinase enhancer 2)(Procollagen C-proteinase enhancer 2)(PCPE-2) [Source:UniProtKB/Swiss-Prot;Acc:Q9UKZ9]	chrNA:-1--1	pig30998;pig30999	0.0121307	5.94684	0.776034	0.130495	1.70761	10.9986	11.0788	10.9776	11.2734	11.1941	10.9056	11.0713	11.1883	10.728	10.9544	11.8149	11.7477	11.033	11.3049	11.6459	11.6554	10.7964	10.9044	10.7125	10.6654
858	pig01165;pig01166	PECAM1	ENSSSCT00000018808	Ssc.14558	ENSSSCG00000017277	396941	PECAM1	Platelet/endothelial cell adhesion molecule	chrNA:-1--1	pig01165;pig01166	-1.44403	9.60227	2.19919	0.229028	4.66532	NaN	10.6933	11.4876	11.6975	14.4427	13.5787	11.6034	11.9628	10.8369	11.0221	12.6174	13.2612	10.9365	12.4432	13.386	13.0472	12.5359	12.1874	14.3171	13.1496
13848	pig24538;pig24539	ACAN;LOC396732	ENSSSCT00000002054|ENSSSCT00000002052	Ssc.15903	ENSSSCG00000001832	396732|397255	PGCA_PIG|LOC396732	Aggrecan G2 domain|Aggrecan core protein Fragments (Cartilage-specific proteoglycan core protein)(CSPCP) [Contains Aggrecan core protein 2] [Source:UniProtKB/Swiss-Prot;Acc:Q29011]	chrNA:-1--1	pig24538;pig24539	0.396723	3.9451	0.496369	0.125819	1.40616	11.3135	11.4147	11.6955	11.8281	11.6888	11.1824	11.626	11.6567	11.1163	11.4453	11.7259	11.8495	11.4751	11.6259	11.8405	11.8595	11.1385	11.1732	11.5931	11.9001
14915	pig42406	PHYH	Ssc#S35167959	Ssc.8139		100134962	PHYH	Phytanoyl-CoA 2-hydroxylase	chrNA:-1--1	pig42406	0.525502	3.90939	0.591762	0.151369	1.51209	11.9876	12.1025	12.1589	12.3322	12.1411	12.0306	12.0644	12.1077	12.1437	12.2629	12.8912	12.7511	11.8802	12.0458	12.4653	12.756	10.8933	11.229	11.6413	13.6011
3259	pig09688;pig09689		ENSSSCT00000010120		ENSSSCG00000009240		PLAC8	Placenta-specific gene 8 protein (Protein C15) [Source:UniProtKB/Swiss-Prot;Acc:Q9NZF1]	chrNA:-1--1	pig09688;pig09689	-0.841885	7.89997	1.76638	0.223593	3.44595	11.0468	10.9732	13.7755	14.1443	12.7026	12.7205	11.3967	11.3762	11.1152	11.3658	12.678	12.6241	10.8722	NaN	12.9568	13.3075	NaN	NaN	NaN	NaN
10228	pig30753;pig30754	PPARG	ENSSSCT00000012672	Ssc.14475	ENSSSCG00000011579	397671	PPARG	Peroxisome proliferator-activated receptor gamma	chrNA:-1--1	pig30753;pig30754	0.00391952	4.23529	0.691168	0.163193	1.63033	10.6796	10.7318	11.5231	11.6978	NaN	NaN	11.0779	11.3006	NaN	10.6646	11.2816	11.4078	10.59	11.2165	11.6756	11.1242	11.2023	10.9927	11.1523	11.0414
8154	pig24780;pig24781	PPP2R3C	ENSSSCT00000002185		ENSSSCG00000001953		PPP2R3C	Serine/threonine-protein phosphatase 2A regulatory subunit B'' subunit gamma (Protein phosphatase subunit G5PR)(Rhabdomyosarcoma antigen MU-RMS-40.6A)(Rhabdomyosarcoma antigen Mu-RMS-40.6C) [Source:UniProtKB/Swiss-Prot;Acc:Q969Q6]	chrNA:-1--1	pig24780;pig24781	-0.215274	4.85458	0.706476	0.145528	1.62343	10.9048	11.1123	11.872	12.1807	11.6455	11.4225	11.6875	11.8711	11.0533	11.3494	11.8121	11.8067	11.1773	11.7259	11.9085	11.7185	NaN	10.7385	11.0612	11.1071
6110	pig18524;pig18525	PRDX6	ENSSSCT00000016874	Ssc.2979	ENSSSCG00000015490	399538	PRDX6	Peroxiredoxin 6	chrNA:-1--1	pig18524;pig18525	-0.446233	3.98899	1.04257	0.261362	2.03031	11.0952	11.4806	12.374	12.748	12.4794	12.0998	11.8722	12.0258	11.4238	11.9764	12.3041	12.3984	12.1427	12.5418	12.6174	12.8263	11.1605	11.5128	10.7957	11.5362
14152	pig38388		Ssc#S52898494	Ssc.216		397126	PTGFR	Prostaglandin F receptor (FP)	chrNA:-1--1	pig38388	0.432356	6.2375	0.850447	0.136344	1.81207	11.0627	11.1682	10.7363	10.6318	11.3435	11.6275	11.1714	11.0475	11.0827	11.1433	12.0484	11.9426	11.0367	10.6986	11.7304	12.1373	NaN	NaN	NaN	NaN
4632	pig13893;pig13894		ENSSSCT00000008847		ENSSSCG00000008074		Q1MNL5_PIG	Osteoglycin Fragment [Source:UniProtKB/TrEMBL;Acc:Q1MNL5]	chrNA:-1--1	pig13893;pig13894	-0.634682	3.8709	1.72286	0.44508	3.62285	12.2795	12.3099	NaN	10.6281	13.5828	12.8801	12.2704	12.8344	12.2111	12.7116	13.3629	13.5221	12.3353	13.3991	14.8548	14.6636	11.7217	11.2935	10.8727	10.8886
13887	pig26368;pig26369	PC	ENSSSCT00000014129|ENSSSCT00000014130		ENSSSCG00000012926		Q7YS28_PIG	Pyruvate carboxylase [Source:UniProtKB/TrEMBL;Acc:Q7YS28]	chrNA:-1--1	pig26368;pig26369	0.401257	4.06841	0.578236	0.142128	1.48827	10.8581	10.9818	11.0838	11.4325	10.6165	NaN	11.2459	11.4232	10.6746	11.0565	11.3646	11.4231	10.649	11.1824	11.5902	11.506	10.8619	10.6582	10.9729	10.8204
7625	pig23180;pig23181		ENSSSCT00000001327		ENSSSCG00000001227		Q9TSW4_PIG	Leucocyte antigen 3/1 (SLA-3/1)MHC class I antigen ; [Source:UniProtKB/TrEMBL;Acc:Q9TSW4]	chrNA:-1--1	pig23180;pig23181	-0.27268	4.44371	1.32454	0.29807	2.51395	NaN	NaN	13.3716	13.6914	11.2214	11.1174	11.4955	11.7219	10.6614	10.9052	12.6491	12.7725	NaN	10.6972	12.079	12.0715	10.667	10.5887	11.1381	12.6499
8971	pig27164;pig27165	RCN1	ENSSSCT00000014544		ENSSSCG00000013318		RCN1	Reticulocalbin-1 Precursor [Source:UniProtKB/Swiss-Prot;Acc:Q15293]	chrNA:-1--1	pig27164;pig27165	-0.128096	4.12243	1.20339	0.291913	2.22012	11.0862	11.1161	10.7431	11.1912	11.8641	11.4507	11.3971	11.4556	11.6813	12.0596	12.5106	12.6708	11.5576	11.9985	12.8734	12.702	11.1263	11.1097	11.4573	11.2246
19518	pig81536		Ssc#S46879752	Ssc.62754		100127136	RDH10	Retinol dehydrogenase 10	chrNA:-1--1	pig81536	1.44264	5.39109	0.757708	0.140548	1.70159	10.9283	10.9706	10.8375	10.7281	11.6894	11.9966	11.9517	11.7552	10.9339	10.9364	11.9011	11.8001	11.2423	10.8861	11.4719	11.6268	11.024	11.099	NaN	NaN
15125	pig44109	RNASE4	Ssc#S35166623	Ssc.11079		396976	RNASE4	Ribonuclease, RNase A family, 4	chrNA:-1--1	pig44109	0.552232	4.11302	0.834527	0.202899	1.78366	12.4277	12.126	12.467	12.4545	12.5038	13.1343	12.295	12.2309	11.9829	11.9478	12.9664	12.6491	12.2563	12.0418	13.0106	13.1964	NaN	10.784	NaN	NaN
18450	pig73167	RPLP1	Ssc#S40513031	Ssc.51793		100170119	RPLP1	Ribosomal protein, large, P1	chrNA:-1--1	pig73167	1.105	4.39545	1.74002	0.395867	3.51395	10.5966	10.8507	13.0038	13.5508	12.7055	12.6686	12.9694	13.6566	10.911	11.3387	13.365	12.8572	11.5566	12.1626	12.58	11.8549	11.37	11.1829	10.8164	10.6079
12540	pig37428;pig37429	LOC100154893	ENSSSCT00000005976		ENSSSCG00000005432	100154893	RS16_PIG	40S ribosomal protein S16 [Source:UniProtKB/Swiss-Prot;Acc:Q29201]	chrNA:-1--1	pig37428;pig37429	0.249384	3.90519	1.02395	0.262202	1.97224	12.4088	12.3644	13.1904	13.3458	13.0025	12.9479	13.3227	13.8493	12.9411	13.2331	13.7728	13.7665	12.531	13.1675	13.8748	13.6291	11.2889	11.2869	11.3397	11.8745
9982	pig30078;pig30079	RPSA	ENSSSCT00000012334		ENSSSCG00000011266		RSSA_PIG	40S ribosomal protein SA (Laminin receptor 1)(LamR)(37/67 kDa laminin receptor)(LRP/LR)(Laminin-binding protein precursor p40)(LBP/p40)(37 kDa laminin receptor precursor)(37LRP)(67 kDa laminin receptor)(67LR) [Source:UniProtKB/Swiss-Prot;Acc:Q4GWZ2]	chrNA:-1--1	pig30078;pig30079	-0.0216465	4.04823	1.65976	0.409998	3.16526	13.0745	13.278	15.0341	15.1726	14.0461	13.898	15.2887	15.3168	13.8234	14.1848	15.6952	15.6973	13.4246	14.1818	14.9226	14.6847	12.5522	11.9123	13.2367	13.5526
7805	pig23730;pig23731	SBAB-1044B7.2;SLA-DMB	ENSSSCT00000001633	Ssc.50352	ENSSSCG00000001469	100135050	SBAB-1044B7.2	MHC class II, DM beta	chrNA:-1--1	pig23730;pig23731	-0.25296	5.91627	1.03354	0.174695	2.03562	11.2554	11.3367	13.0063	13.2922	12.3219	11.985	11.557	11.686	11.0453	11.5808	12.3387	12.5111	11.2739	11.6072	12.184	12.3186	11.0872	11.2751	10.6386	13.1617
13809	pig23716	LOC100153464;SBAB-554F3.2	ENSSSCT00000001621|ENSSSCT00000001622	Ssc.11073|Ssc.72384	ENSSSCG00000001461	396975|100153464	SBAB-554F3.2|LOC100153464	Hypothetical protein LOC100153464|Proteasome (prosome, macropain) subunit, beta type, 8 (large multifunctional peptidase 7)	chrNA:-1--1	pig23716	0.392105	4.68994	1.06878	0.227888	2.12931	10.8044	10.8023	12.4565	12.7768	12.147	12.071	11.0348	11.1714	10.8522	11.1301	11.6273	11.7528	10.8751	11.3049	12.3254	12.1585	10.6209	10.6016	10.9486	11.0544
7797	pig23706;pig23707	SBAB-591C4.5;SLA-DQA1	ENSSSCT00000001616	Ssc.72102|Ssc.53714	ENSSSCG00000001456	100153387|100135044	SBAB-591C4.5|SLA-DQA1	MHC class II antigen|MHC class II, DQ alpha	chrNA:-1--1	pig23706;pig23707	-0.253871	4.48477	2.04305	0.455553	4.2508	11.7153	12.1655	15.6973	15.7624	14.6721	14.6814	12.2318	12.6154	12.485	12.8912	13.7854	13.8004	12.7899	13.3931	14.9592	14.8843	11.3941	11.2006	10.9924	11.7297
11352	pig33925;pig33926		ENSSSCT00000011546	Ssc.16159	ENSSSCG00000010554	396670	SCD	Stearoyl-CoA desaturase	chrNA:-1--1	pig33925;pig33926	0.122113	10.0808	3.13999	0.311481	9.15767	NaN	NaN	12.3721	12.5603	10.8548	10.9187	12.5078	12.8293	11.0953	11.5021	14.8476	14.9562	10.8241	11.3962	14.1818	13.9331	10.7743	10.7567	10.7098	10.6474
4995	pig15026;pig15027	SDC1	ENSSSCT00000009412		ENSSSCG00000008601		SDC1	Syndecan-1 Precursor (SYND1)(CD138 antigen) [Source:UniProtKB/Swiss-Prot;Acc:P18827]	chrNA:-1--1	pig15026;pig15027	-0.58602	3.94652	0.800554	0.202851	1.72497	10.8606	10.9748	11.0795	11.1094	12.1028	11.2212	11.4453	11.455	10.9636	11.4682	11.6424	11.8828	11.5684	11.8647	11.9366	12.0075	11.2209	11.5609	11.5345	11.4587
472	pig86275	SELK	ENSSSCT00000012540|Ssc#S40292823	Ssc.68585	ENSSSCG00000011459	733604	SELK_PIG	Selenoprotein K (SelK) [Source:UniProtKB/Swiss-Prot;Acc:Q2EN82]|Transcribed locus	chrNA:-1--1	pig86275	-1.67106	3.93994	0.787587	0.199898	1.74214	12.1953	12.0152	12.6056	12.753	13.1591	13.4742	13.2093	13.2421	12.3614	12.2854	13.3209	13.0733	12.7751	12.5789	12.6703	12.9432	14.8843	15.4825	11.2951	11.6012
14937	pig42660	SEPP1	Ssc#S36038434	Ssc.8479		100037964	SEPP1	Selenoprotein P	chrNA:-1--1	pig42660	0.528385	7.93778	2.13692	0.269209	4.34579	11.8554	11.7251	13.0886	13.225	13.7728	13.77	13.1778	13.2699	12.2344	12.5256	14.0019	13.9978	12.5945	12.9181	14.391	14.4976	12.537	12.6633	12.5855	13.6109
15845	pig48489	SFRP4	Ssc#S43678669	Ssc.19566		100145890	SFRP4	Secreted frizzled-related protein 4	chrNA:-1--1	pig48489	0.647898	7.09448	2.01276	0.283708	3.95634	11.2826	11.0645	11.5797	11.2401	11.6967	11.385	11.8079	11.5124	11.9677	11.1843	13.3227	13.223	11.0757	11.0171	13.7592	13.2453	11.4959	11.6611	10.7541	11.4199
14512	pig39954		Ssc#S23213148	Ssc.3772		100240725	SGCE	Sarcoglycan, epsilon	chrNA:-1--1	pig39954	0.475752	4.60207	1.03366	0.224609	2.02879	12.789	12.5146	10.7363	10.8913	13.6146	13.5139	12.5981	12.7308	13.0794	13.183	13.8127	13.7552	13.2486	13.4595	13.9403	14.1924	10.8965	11.0696	10.6078	NaN
13813	pig23735;pig23736	SLA-DMA;SLA-DOA	ENSSSCT00000001635|ENSSSCT00000001634	Ssc.69929|Ssc.13777	ENSSSCG00000001470	445528|100135038	SLA-DOA|SLA-DMA|NP_001107177.1	Major histocompatibility complex, class II, DO alpha|major histocompatibility complex, class II, DO alpha [Source:RefSeq peptide;Acc:NP_001107177]|SLA-DM alpha chain	chrNA:-1--1	pig23735;pig23736	0.39254	5.57951	0.923048	0.165435	1.89871	10.9906	11.1031	12.2153	12.6979	12.5439	12.0665	10.9803	11.0402	10.8822	11.2518	11.8044	11.8466	11.1928	11.4414	12.1037	12.1652	10.6933	10.6379	11.2035	11.0625
7798	pig23708;pig23709	SLA-DQB1	ENSSSCT00000001617	Ssc.11063|Ssc.70921	ENSSSCG00000001457	100037921	SLA-DQB1	SLA-DQ beta1 domain	chrNA:-1--1	pig23708;pig23709	-0.253749	4.0283	1.21834	0.302445	2.32411	10.9848	11.1197	13.1572	13.278	12.2815	12.3346	11.2974	11.5314	11.2149	11.805	12.2004	12.1662	11.4674	12.0099	12.8355	12.7956	11.2787	11.0737	11.9319	11.753
7795	pig23690;pig23691	SLA-DRA	ENSSSCT00000001609	Ssc.222	ENSSSCG00000001453	100135040	SLA-DRA	MHC class II DR-alpha	chrNA:-1--1	pig23690;pig23691	-0.254137	5.02457	2.08853	0.415663	4.21245	11.0382	11.1684	14.7181	14.932	13.838	13.7228	11.8039	12.1221	11.8478	12.1846	13.1737	13.2678	11.831	12.4987	14.1539	13.9978	11.5369	11.2902	11.5946	12.1578
12589	pig37555;pig37556		ENSSSCT00000006040		ENSSSCG00000005494	397460	TENA_PIG	Tenascin Precursor (TN)(Tenascin-C)(TN-C)(Hexabrachion)(Cytotactin)(Neuronectin)(GMEM)(JI)(Myotendinous antigen)(Glioma-associated-extracellular matrix antigen)(GP 150-225)(P230) [Source:UniProtKB/Swiss-Prot;Acc:Q29116]	chrNA:-1--1	pig37555;pig37556	0.254642	21.6408	3.42942	0.15847	10.8552	11.2062	11.3031	12.2934	12.0495	10.8837	11.4023	13.5028	13.0677	11.195	11.1364	14.4133	14.519	11.3159	10.86	14.7307	14.8953	NaN	NaN	NaN	NaN
2506	pig06841;pig06842	TENC1	ENSSSCT00000000273		ENSSSCG00000000254		TENC1	Tensin-like C1 domain-containing phosphatase (EC 3.1.3.-)(C1 domain-containing phosphatase and tensin homolog)(C1-TEN)(Tensin-2) [Source:UniProtKB/Swiss-Prot;Acc:Q63HR2]	chrNA:-1--1	pig06841;pig06842	-0.979774	4.82573	1.62478	0.336692	3.23001	10.7627	10.9174	11.8165	12.109	11.2046	10.7392	11.4286	11.5959	10.689	11.1743	12.6436	13.2145	10.7143	11.6046	12.1863	11.998	11.1909	11.0239	11.5321	11.6708
12099	pig36124;pig36125	THBS1	ENSSSCT00000005288	Ssc.924	ENSSSCG00000004789	492313	THBS1	Thrombospondin 1	chrNA:-1--1	pig36124;pig36125	0.201755	6.81085	0.662709	0.0973019	1.58089	10.9669	11.0514	NaN	10.6027	11.0529	10.8239	10.7853	10.8116	NaN	10.8195	11.5651	11.6116	NaN	10.7832	11.5859	11.6578	10.7284	10.7458	NaN	10.7851
3115	pig09152;pig09153		ENSSSCT00000009859	Ssc.17337	ENSSSCG00000009002	396623	TLR2	Toll-like receptor 2	chrNA:-1--1	pig09152;pig09153	-0.866421	3.90694	0.75009	0.191989	1.67418	11.0031	11.007	12.7626	13.0242	12.4952	12.4132	11.4345	11.4142	11.176	11.5036	11.7878	11.9271	11.3274	10.771	11.806	12.1693	NaN	NaN	NaN	NaN
119	pig20470;pig20471		Ssc#S35173373|ENSSSCT00000017853	Ssc.45486|Ssc.75269	ENSSSCG00000016396	100286870	TNFAIP6	Tumor necrosis factor, alpha-induced protein 6|Transcribed locus, strongly similar to NP_001153079.1 tumor necrosis factor, alpha-induced protein 6 [Sus scrofa]	chrNA:-1--1	pig20470;pig20471	-2.15092	5.80892	1.33111	0.229149	2.49314	10.774	NaN	12.7116	12.3863	13.1152	13.0886	11.4715	11.2393	10.7757	NaN	12.2736	12.3846	11.2063	10.5925	12.6187	12.1275	11.0432	11.4927	NaN	10.896
4754	pig14258;pig14259	TMSB10	ENSSSCT00000009030		ENSSSCG00000008245		TYB10_PIG	Thymosin beta-10 (Thymosin beta-9) [Source:UniProtKB/Swiss-Prot;Acc:P21753]	chrNA:-1--1	pig14258;pig14259	-0.617892	4.36771	0.673171	0.154125	1.5867	15.0341	15.25	15.6973	15.7624	15.8308	15.8055	15.2887	15.3168	14.8676	15.2804	15.6952	15.6973	15.0504	15.2367	15.8757	15.8566	12.8597	13.5828	10.9072	13.203
457	pig77599;pig77600	2810008M24RIK;2810008M24Rik;C5ORF43;C5orf43;LOC100046418	ENSSSCT00000018443|Ssc#S50160751	Ssc.57339	ENSSSCG00000016935		2810008M24RIK;2810008M24Rik;C5ORF43;C5orf43;LOC100046418	Transcribed locus, strongly similar to NP_001041715.1 hypothetical protein LOC75616 [Mus musculus]	chrNA:-1--1	pig77599;pig77600	-1.68278	4.94727	0.679045	0.137256	1.60941	10.683	10.6225	11.3658	11.6521	11.316	11.4498	10.9664	10.9194	10.7033	10.616	11.4602	11.4103	10.8935	10.7421	11.07	11.4005	10.7981	11.0229	10.5781	NaN
14828	pig41648;pig41649	ALDH1A1;Aldh1a1	Ssc#S35169764	Ssc.6928			ALDH1A1;Aldh1a1	Transcribed locus, strongly similar to NP_038495.2 aldehyde dehydrogenase 1A1 [Mus musculus]	chrNA:-1--1	pig41648;pig41649	0.514843	3.96213	0.608546	0.153591	1.52399	11.7764	11.6236	10.8897	10.6548	12.3402	12.6436	11.4146	11.1658	11.3994	11.5399	12.1886	12.1769	12.04	11.7402	12.0228	12.3853	11.1257	11.171	10.8167	11.0506
18605	pig75238	AP3S1;Ap3s1	Ssc#S35173812	Ssc.54035			AP3S1;Ap3s1	Transcribed locus, strongly similar to NP_033811.1 adaptor-related protein complex 3, sigma 1 subunit [Mus musculus]	chrNA:-1--1	pig75238	1.14231	4.72071	1.23882	0.262423	2.43088	11.9999	11.8406	13.1755	13.1026	12.5099	13.2421	12.4229	12.2276	12.0112	11.8165	13.5733	13.4413	11.9543	11.8125	12.6788	12.9302	12.5072	13.3527	10.8884	11.4289
14385	pig39380;pig39381	APC	Ssc#S19541281	Ssc.2592			APC	Transcribed locus, strongly similar to NP_001120982.1 adenomatous polyposis coli [Homo sapiens]	chrNA:-1--1	pig39380;pig39381	0.459995	5.00631	0.387828	0.0774678	1.30829	10.6236	10.7138	10.7886	10.9179	11.1609	10.9167	10.7233	10.7834	10.6565	10.727	11.0147	11.0663	10.807	11.2508	11.0733	11.1179	10.8028	10.9655	11.1286	10.8531
5788	pig17532;pig17533	C11ORF70;C11orf70	ENSSSCT00000016342	Ssc.39770	ENSSSCG00000014980		C11ORF70;C11orf70	Transcribed locus, strongly similar to NP_116319.1 hypothetical protein LOC85016 [Homo sapiens]	chrNA:-1--1	pig17532;pig17533	-0.485399	4.81187	0.721824	0.150009	1.64861	11.3432	11.2069	11.3858	11.2817	12.0093	11.7948	11.8592	11.8652	11.0345	11.3626	11.9907	12.086	11.6804	11.4762	11.751	12.0069	10.6606	10.962	NaN	NaN
14519	pig39984;pig39985	C20ORF30;C20orf30	Ssc#S35166879	Ssc.3876			C20ORF30;C20orf30	Transcribed locus, strongly similar to NP_054864.3 hypothetical protein LOC29058 isoform 2 [Homo sapiens]	chrNA:-1--1	pig39984;pig39985	0.476688	5.22734	0.670559	0.128279	1.59041	11.7046	11.7601	12.747	12.8885	12.2503	12.3617	11.7651	11.8366	11.6361	11.9309	12.4908	12.3801	11.6327	11.8178	12.3016	12.5415	10.8517	11.0055	10.8632	11.3265
6243	pig18901;pig18902	C4BPA	ENSSSCT00000017061	Ssc.57806	ENSSSCG00000015663		C4BPA	Transcribed locus, strongly similar to NP_999107.1 complement component 4 binding protein, alpha chain precursor [Sus scrofa]	chrNA:-1--1	pig18901;pig18902	-0.4305	16.6216	3.22905	0.194268	9.42383	12.3147	12.0239	15.0504	14.7875	15.3882	15.3593	14.503	14.2271	12.4416	12.2568	15.6952	15.6973	13.7802	13.1646	15.25	15.3109	12.1548	13.0655	10.8237	12.2032
15028	pig43392	CCL14	Ssc#S23764605	Ssc.9803			CCL14	Transcribed locus, weakly similar to NP_001040050.1 chemokine (C-C motif) ligand 14 [Bos taurus]	chrNA:-1--1	pig43392	0.539776	4.41926	1.81411	0.4105	3.79605	10.7029	10.9096	10.823	10.9989	12.9888	12.5674	11.1662	11.5432	10.8131	11.2204	12.2184	12.0523	11.9055	12.7287	13.4656	13.166	11.7454	11.4319	11.1356	10.8372
15423	pig46344;pig46345	CRIP1;Crip1	Ssc#S35164539	Ssc.15316			CRIP1;Crip1	Transcribed locus, strongly similar to NP_031789.1 cysteine-rich protein 1 (intestinal) [Mus musculus]	chrNA:-1--1	pig46344;pig46345	0.591116	4.61389	1.22768	0.266083	2.35997	11.1312	10.9349	13.8091	13.4459	12.7822	12.7768	11.7648	11.6787	11.575	11.1633	12.7519	12.6256	11.8592	11.3781	12.3808	11.9568	11.1133	11.1858	10.9138	11.4883
14759	pig41268;pig41269	CRIP2	Ssc#S35170159	Ssc.6208			CRIP2	Transcribed locus, strongly similar to NP_001303.1 cysteine-rich protein 2 [Homo sapiens]	chrNA:-1--1	pig41268;pig41269	0.506293	7.87812	2.23103	0.283193	4.58061	10.7187	10.8803	11.0561	10.9083	12.7687	12.8689	12.9952	12.7543	11.1445	11.68	13.5575	13.4855	12.0593	12.5936	13.2175	13.0871	13.0541	13.4292	15.5602	15.2774
16756	pig55071	CRISPLD2	Ssc#S35167297	Ssc.29863			CRISPLD2	Transcribed locus, moderately similar to NP_113664.1 cysteine-rich secretory protein LCCL domain containing 2 precursor [Homo sapiens]	chrNA:-1--1	pig55071	0.782175	4.63943	1.10395	0.237949	2.11431	10.7558	10.7206	11.2563	11.5216	10.7891	11.0893	11.3361	11.529	11.1369	11.4494	12.0661	11.9639	11.4316	11.8959	12.364	12.0845	11.2713	11.198	10.8031	10.7533
278	pig41022;pig41023	DEB1;Deb1;SS18L2	Ssc#S35172081|ENSSSCT00000012353	Ssc.5794	ENSSSCG00000011283		DEB1;Deb1;SS18L2	Transcribed locus, strongly similar to NP_081070.1 differentially expressed in B16F10 1 [Mus musculus]	chrNA:-1--1	pig41022;pig41023	-1.86067	4.48754	0.91894	0.204776	1.85757	NaN	10.597	11.7918	11.9656	11.639	11.4386	11.9103	12.1142	11.065	11.3703	11.9646	11.9172	10.8731	11.2547	11.9094	11.9403	NaN	10.7217	11.4425	12.753
12837	pig38250;pig38251	EGFL7	ENSSSCT00000006406	Ssc.3370	ENSSSCG00000005828		EGFL7	Transcribed locus, strongly similar to XP_001496755.1 PREDICTED: similar to EGF-like-domain, multiple 7 isoform 1 [Equus caballus]	chrNA:-1--1	pig38250;pig38251	0.282116	6.83135	1.5017	0.219825	2.82452	10.6716	10.8323	11.3967	11.5859	12.331	11.3749	11.3587	11.6224	10.997	11.2757	12.4378	12.6174	11.4003	12.1397	12.6124	12.1158	12.5597	12.5294	13.0068	12.0744
19488	pig81135	FAU	Ssc#S31105561	Ssc.62361			FAU	Transcribed locus, strongly similar to NP_001988.1 ubiquitin-like protein fubi and ribosomal protein S30 precursor [Homo sapiens]	chrNA:-1--1	pig81135	1.42959	4.14054	0.332014	0.0801861	1.2587	NaN	10.7804	10.7736	11.251	NaN	NaN	10.7433	10.9727	NaN	10.6742	11.0864	11.0253	10.6623	10.604	10.9791	NaN	12.7737	12.1025	11.595	11.0941
19811	pig87806	FCGR3B	Ssc#S14893967	Ssc.70575			FCGR3B	Transcribed locus, strongly similar to NP_999556.1 low affinity immunoglobulin gamma Fc region receptor III-B [Sus scrofa]	chrNA:-1--1	pig87806	1.60185	8.11031	1.48047	0.182542	2.76811	10.9391	11.3711	12.7091	12.8263	13.2596	13.1974	11.3725	11.3672	10.8714	11.2701	12.7128	12.686	11.8526	11.8356	12.5096	12.4653	11.7306	12.1167	11.3397	10.7557
10972	pig32880;pig32881	GGT5	ENSSSCT00000011016	Ssc.56307	ENSSSCG00000010055		GGT5	Transcribed locus, strongly similar to XP_001929353.1 PREDICTED: similar to Gamma-glutamyltransferase 5 precursor (Gamma-glutamyltranspeptidase 5) (GGT 5) (Gamma-glutamyltransferase-like activity 1) (Gamma-glutamyl transpeptidase-related enzyme) (GGT-rel) [Sus scrofa]	chrNA:-1--1	pig32880;pig32881	0.0822657	7.45963	0.817713	0.109618	1.75936	10.98	11.059	11.5838	11.7751	11.0277	10.8435	11.6075	11.7492	10.9354	11.1984	11.8027	11.9088	11.0156	11.4724	11.9109	11.8212	10.9932	10.975	10.747	11.8536
6013	pig18193;pig18194	GNG11	ENSSSCT00000016697	Ssc.1133	ENSSSCG00000015324		GNG11	Transcribed locus, strongly similar to NP_004117.1 guanine nucleotide binding protein gamma 11 precursor [Homo sapiens]	chrNA:-1--1	pig18193;pig18194	-0.457582	8.19404	1.39411	0.170137	2.60421	14.3985	14.4252	14.0361	14.3315	15.0445	14.5325	14.0759	15.3168	13.9037	14.2899	15.6952	15.6973	14.2807	15.223	15.6444	15.5569	14.2357	14.653	14.611	14.503
15940	pig48942;pig48943	GOLIM4	Ssc#S23775239	Ssc.21060			GOLIM4	Transcribed locus, moderately similar to NP_055313.1 golgi integral membrane protein 4 [Homo sapiens]	chrNA:-1--1	pig48942;pig48943	0.661409	4.59594	0.916879	0.199497	1.8961	11.2761	11.5063	11.6038	11.2633	12.4336	12.9411	12.1112	11.6377	11.7334	11.5608	12.6582	12.6247	12.0642	11.6524	12.2984	12.1627	11.4415	11.5257	11.1832	11.3328
19850	pig87934;pig87935	H3F3A;H3F3C;LOC100331798;LOC100331922;ZGC:110292;ZGC:56418;h3f3a;h3f3c;zgc:110292;zgc:56418	Ssc#S19541726	Ssc.70776			H3F3A;H3F3C;LOC100331798;LOC100331922;ZGC:110292;ZGC:56418;h3f3a;h3f3c;zgc:110292;zgc:56418	Transcribed locus, strongly similar to NP_998161.1 H3 histone, family 3A [Danio rerio]	chrNA:-1--1	pig87934;pig87935	1.62951	5.32768	1.10102	0.20666	2.13719	13.4246	13.698	14.4252	13.7095	15.1444	14.8548	14.0141	13.9122	14.0222	13.8234	15.0187	15.0148	14.5608	14.727	14.7149	14.6239	15.7807	15.7681	15.5796	15.2887
4547	pig13678;pig13679	HBA1;HBA2	ENSSSCT00000008741	Ssc.53929	ENSSSCG00000007978		HBA1;HBA2	Transcribed locus, moderately similar to NP_000508.1 alpha 2 globin [Homo sapiens]	chrNA:-1--1	pig13678;pig13679	-0.646109	5.3688	1.99288	0.371197	3.70598	13.103	13.3944	15.6973	15.7624	13.6713	13.4706	12.201	12.4222	14.1889	14.4669	15.6952	15.6973	11.54	12.1359	15.8757	15.8566	11.7675	11.434	12.9123	13.8438
16596	pig53890	IL3RA	Ssc#S35169313	Ssc.28066			IL3RA	Transcribed locus, weakly similar to NP_002174.1 interleukin 3 receptor, alpha precursor [Homo sapiens]	chrNA:-1--1	pig53890	0.757598	4.18652	0.481238	0.11495	1.39747	11.1314	11.2417	11.0308	11.0114	11.8067	12.3408	11.1775	11.0945	11.2761	11.3221	11.7831	11.7213	11.0915	10.8588	11.5667	11.8251	10.9179	10.985	NaN	11.1231
19680	pig84784	INTS6	Ssc#S39970194	Ssc.66754			INTS6	Transcribed locus, strongly similar to NP_001035027.1 integrator complex subunit 6 isoform c [Homo sapiens]	chrNA:-1--1	pig84784	1.52414	4.41833	0.369507	0.0836305	1.29306	NaN	10.6008	10.6956	10.6828	10.7084	NaN	10.9975	11.2186	NaN	10.6191	10.9636	11.1059	10.6075	10.8303	10.944	NaN	12.4658	12.0587	11.0241	10.8442
18166	pig71000	KIAA1033	Ssc#S35169133	Ssc.48568			KIAA1033	Transcribed locus, strongly similar to NP_056090.1 hypothetical protein LOC23325 [Homo sapiens]	chrNA:-1--1	pig71000	1.04038	3.99788	0.473331	0.118395	1.3932	NaN	NaN	11.3197	11.209	10.7124	NaN	10.8142	11.1849	NaN	NaN	11.3114	11.2583	10.6581	10.7292	11.0112	NaN	12.0057	11.8337	11.8598	11.1204
15158	pig44239	KIAA1239	Ssc#S6072519	Ssc.11337			KIAA1239	Transcribed locus, moderately similar to NP_001138462.1 hypothetical protein LOC57495 [Homo sapiens]	chrNA:-1--1	pig44239	0.556454	4.63494	0.979074	0.211238	1.97336	11.7417	11.7404	13.5484	13.7333	11.9183	11.9399	12.9346	13.4706	12.0503	12.194	13.192	13.0038	11.8912	12.611	12.8162	12.6308	14.0968	13.589	15.2644	15.3935
8962	pig27141;pig27142	LMO2;Lmo2	ENSSSCT00000014533	Ssc.12966	ENSSSCG00000013307		LMO2;Lmo2	Transcribed locus, strongly similar to NP_001032435.1 LIM domain only 2 [Rattus norvegicus]	chrNA:-1--1	pig27141;pig27142	-0.128981	6.01674	0.843867	0.140253	1.79318	10.7684	10.882	11.5343	11.7074	11.6351	11.7972	11.2559	11.4805	10.6403	10.9732	11.6843	11.6174	11.0588	11.6743	11.8164	11.5213	11.016	10.9918	11.1774	11.0803
716	pig00748;pig00749	LOC100153727;LOC100360977;LOC100362969;PPIA;Ppia	ENSSSCT00000018219	Ssc.71286|Ssc.70433	ENSSSCG00000016737		LOC100153727;LOC100360977;LOC100362969;PPIA;Ppia	Transcribed locus, strongly similar to NP_058797.1 peptidylprolyl isomerase A (cyclophilin A) [Rattus norvegicus]	chrNA:-1--1	pig00748;pig00749	-1.51545	3.86546	0.885599	0.229106	1.83168	12.6721	12.702	14.234	14.5712	13.3427	13.2076	13.6997	13.838	12.9302	13.3209	13.6051	13.9868	12.9694	13.3944	13.6095	13.9662	12.0933	12.1706	11.0856	13.4776
18968	pig77019;pig77020	LOC499136	Ssc#S26711451	Ssc.56543			LOC499136	Transcribed locus, weakly similar to NP_001041402.1 hypothetical protein LOC499136 [Rattus norvegicus]	chrNA:-1--1	pig77019;pig77020	1.24252	4.10537	0.623962	0.151987	1.53574	12.2861	12.1203	12.6903	12.9516	12.3572	12.4653	12.7725	12.8788	12.4621	12.5181	13.0591	12.8049	12.4069	12.4229	12.9888	13.0295	12.1988	12.7329	11.1563	11.6304
15668	pig47461	LRRC70	Ssc#S39768560	Ssc.18091			LRRC70	Transcribed locus, moderately similar to NP_852607.3 synleurin precursor [Homo sapiens]	chrNA:-1--1	pig47461	0.623722	4.83487	0.87898	0.1818	1.83948	NaN	NaN	11.0401	11.423	13.349	12.9982	11.0185	11.3362	NaN	10.8089	11.9163	11.9684	10.8857	11.7409	12.2272	11.7659	11.6727	11.5312	12.3737	11.3382
[truncated: 52 more rows]
