# Supplementary material for: Systems Biology Approach to the Dissection of the Complexity of Regulatory Networks in the S. scrofa Cardiocirculatory System
Source: MDPI journal article supplement (doi:10.3390/ijms141123160), 2013-11-21
Supplement: s3 [file s3]

## Sheet: Hubs heart network
Name	exSYMBOL	Primary_id	UniGene	ENSEMBL	entrez	symbol	Descr	Ascending.aorta_1.cexp	Ascending.aorta_2.cexp	Corner.pulmunary.valve_F_1.cexp	Corner.pulmunary.valve_F_2.cexp	Corner.pulmunary.valve_I_1.cexp	Corner.pulmunary.valve_I_2.cexp	Coronary.artery_1.cexp	Coronary.artery_2.cexp	Descending.aorta_1.cexp	Descending.aorta_2.cexp	Inferior.vena.cava_1.cexp	Inferior.vena.cava_2.cexp	Pulmunary.artery_1.cexp	Pulmunary.artery_2.cexp	Superior.vena.cava_1.cexp	Superior.vena.cava_2.cexp	atrio_sin2.bassa.exp	atrio_sin3.bassa.exp	ventr_sin1.bassa.exp	ventr_sin2.interm.exp
pig14427;pig14428	TGFA	Ssc#S35166485|ENSSSCT00000009118	Ssc.16220	ENSSSCG00000008326	397484	TGFA	Transforming growth factor, alpha	1663.47	1742.77	2165.28	2382.2	2096.96	NA	2222.03	2771.26	NA	2264.31	2012.97	2659.51	1598.34	2957.16	3077.08	2077.59	2819.06	2332.81	5587.12	2924.25
pig01671;pig01672	PLXDC1	ENSSSCT00000019064		ENSSSCG00000017511		PLXDC1	Plexin domain-containing protein 1 Precursor (Tumor endothelial marker 7)(Tumor endothelial marker 3) [Source:UniProtKB/Swiss-Prot;Acc:Q8IUK5]	1579.85	1920.79	2457.69	2899.69	2831.07	1595.44	2633.29	2976.68	1722.81	2429.38	2298.66	3092.34	1768.81	4358.33	3111.31	2145.43	3075.36	2636.04	11825.8	3632.73
pig07340;pig07341	ZFC3H1	ENSSSCT00000000547	Ssc.33497	ENSSSCG00000000508			Transcribed locus, strongly similar to NP_659419.3 proline/serine-rich coiled-coil 2 [Homo sapiens]	1704.2	1873.3	1947.75	2587.81	2354.72	1667.89	2018.61	2507.69	1534.24	2015.8	1736.04	2098.2	1738.02	3109.71	2702.41	2299.48	2460.14	1987.38	7262.73	2773.1
pig08981;pig08982	TMPRSS11D	ENSSSCT00000009774		ENSSSCG00000008926		TMPRSS11D	Transmembrane protease, serine 11D Precursor (EC 3.4.21.-)(Airway trypsin-like protease) [Contains Transmembrane protease, serine 11D non-catalytic chain;Transmembrane protease, serine 11D catalytic chain] [Source:UniProtKB/Swiss-Prot;Acc:O60235]	NA	NA	1668.56	1948.58	1831.31	NA	1712.85	2239.2	NA	1691.67	1689.11	2174.36	NA	2818.7	2589.12	1771.84	3131.93	2196.85	11380.1	3938.21
pig10076;pig10077	KIAA0895L	ENSSSCT00000003088		ENSSSCG00000002789		KIAA0895L	Uncharacterized protein KIAA0895-like [Source:UniProtKB/Swiss-Prot;Acc:Q68EN5]	NA	NA	1604.27	1631.54	1775.01	NA	1698.31	2142.16	NA	1628.83	1587.75	2116.46	NA	2695.8	2328.5	1632.2	2463.04	2125.41	7091.73	3375.93
pig10101;pig10102	SETD6	ENSSSCT00000003100	Ssc.47782	ENSSSCG00000002800			Transcribed locus, strongly similar to NP_079136.1 SET domain containing 6 [Homo sapiens]	1652.29	1718.59	1816.92	2210.16	2076.51	NA	1775.62	2402.19	NA	1876.96	1660.47	2082.28	1599.21	3362.19	2567.45	2056.15	2537.45	2099.61	9181.89	3536.97
pig13884;pig13885	CENPP	ENSSSCT00000008843		ENSSSCG00000008070		CENPP	Centromere protein P (CENP-P) [Source:UniProtKB/Swiss-Prot;Acc:Q6IPU0]	NA	NA	1733.74	2113.47	1918.91	NA	1724.64	2230.89	NA	1935.63	1680.02	2187.04	NA	3148.01	2532.64	1789.19	2369.22	2161.96	9057.5	3412.74
pig13911;pig13912	PTPDC1	ENSSSCT00000008856		ENSSSCG00000008083		PTPDC1	Protein tyrosine phosphatase domain-containing protein 1 (EC 3.1.3.-) [Source:UniProtKB/Swiss-Prot;Acc:A2A3K4]	1544.72	1672.14	1889.89	2324.22	1713.62	1565.19	2058.57	2410.39	NA	2002.92	1897.53	2336.18	1745.2	3277.46	2648.2	2110.61	2517.72	2112.03	8681.34	3413.15
pig13913;pig13914	ZFP90	ENSSSCT00000008857		ENSSSCG00000008084		ZFP90	Zinc finger protein 90 homolog (Zfp-90) [Source:UniProtKB/Swiss-Prot;Acc:Q8TF47]	1706.08	1814.22	1756.83	2052.88	1645.92	NA	1755.31	2121.28	NA	1927.56	1589.53	1886.83	1567.34	3064.17	2391.94	2016.36	2378.75	1943.29	5698.22	3178.06
pig14451;pig14452	ANXA4	ENSSSCT00000009129		ENSSSCG00000008336		ANXA4_PIG	Annexin A4 (Annexin-4)(Annexin IV)(Lipocortin IV)(Endonexin I)(Chromobindin-4)(Protein II)(P32.5)(Placental anticoagulant protein II)(PAP-II)(PP4-X)(35-beta calcimedin) [Source:UniProtKB/Swiss-Prot;Acc:P08132]	1705.54	1744.71	1803.13	2205.4	1679.53	NA	1796.71	2145.75	NA	1819.31	1685.03	2045.83	1652.97	2823.01	2385.41	1858.62	2367.72	2114.09	3385.85	2291.01
pig14961;pig14962	ASXL2	ENSSSCT00000009382		ENSSSCG00000008575		ASXL2	Putative Polycomb group protein ASXL2 (Additional sex combs-like protein 2) [Source:UniProtKB/Swiss-Prot;Acc:Q76L83]	1534.83	NA	1618.34	1655.84	1706.14	NA	1576	1967.31	NA	1580.8	1538.44	1962.99	NA	2631.68	2314.44	1607.83	2665.71	2030.8	5246.25	3088.65
pig14979;pig14980	C2ORF79;C2orf79	ENSSSCT00000009389	Ssc.6448	ENSSSCG00000008580			Transcribed locus, strongly similar to NP_001013685.1 hypothetical protein LOC391356 [Homo sapiens]	NA	1600.3	2031.95	2254.69	1643.99	NA	1917.83	2282.32	NA	1831.95	1903.93	2404.47	1557.39	2914.88	2452.79	1986.41	2559.81	2283.62	6909.16	3061.46
pig15865;pig15866	LOC100151798;UPRT	ENSSSCT00000013586	Ssc.44971	ENSSSCG00000012425	100151798	LOC100151798	Similar to uracil phosphoribosyltransferase (FUR1) homolog	NA	NA	1723.7	1829.03	1832.12	NA	1579.85	2152.24	NA	1780.22	1647.25	2217.46	NA	2650.21	2251.97	1726.28	3135.28	2330.89	12349.2	4042.46
pig16314;pig16315	GRIA3;LOC100152391	ENSSSCT00000013819	Ssc.17487	ENSSSCG00000012638	100152391	LOC100152391	Similar to glutamate receptor, ionotrophic, AMPA 3	NA	NA	1589.5	1773.92	1942.41	NA	1725.45	2283.29	NA	1648.83	1938.79	2351.64	NA	2792.79	2543.26	1716.83	2806.88	2305.74	8258.74	3327.97
pig16324;pig16325	ODZ1	ENSSSCT00000013825		ENSSSCG00000012644		ODZ1	Teneurin-1 (Ten-1)(Tenascin-M1)(Ten-m1)(Protein Odd Oz/ten-m homolog 1) [Source:UniProtKB/Swiss-Prot;Acc:Q9UKZ4]	NA	NA	1600.13	1896	1771.94	NA	1531.75	2028.59	NA	1845.42	1629.46	2047.53	NA	2627.33	2292.39	1621.35	2519.89	2307.54	5758.74	3079.24
pig16595;pig16596	LOC100360379;PNCK;Pnck	ENSSSCT00000013965	Ssc.22845	ENSSSCG00000012773			Transcribed locus, strongly similar to NP_058971.1 pregnancy upregulated non-ubiquitously expressed CaM kinase [Rattus norvegicus]	NA	1648.06	2020.14	2281.12	2146.19	NA	2074	2544.96	1622.24	2299.36	2237.05	2613.88	1695.29	3491.05	3067.96	2021.34	2792.86	2465.66	8451.1	3524.46
pig17134;pig17135	PGAP2	ENSSSCT00000016144		ENSSSCG00000014793		PGAP2	Post-GPI attachment to proteins factor 2 (FGF receptor-activating protein 1) [Source:UniProtKB/Swiss-Prot;Acc:Q9UHJ9]	NA	1561.54	1966.25	2230.24	2028.66	NA	1979.47	2456.14	NA	2026.35	1983.08	2416.71	1617.11	3048.72	2832.81	1921.67	3063.2	2395.64	7432.7	3054.45
pig17420;pig17421	TRIM77	ENSSSCT00000016289		ENSSSCG00000014932		TRIM77	Putative tripartite motif-containing protein 64D [Source:UniProtKB/Swiss-Prot;Acc:A8MWY9]	1656.31	1675.46	1903.08	2223.47	1539.91	NA	1846.78	2350.98	NA	1909.19	1688.24	2037.4	NA	2605.54	2401	1785.56	2635.28	2197.58	3131.93	2721.8
pig17718;pig17719	PAFAH1B2	ENSSSCT00000016441		ENSSSCG00000015075		PAFAH1B2	Platelet-activating factor acetylhydrolase IB subunit beta (EC 3.1.1.47)(PAF acetylhydrolase 30 kDa subunit)(PAF-AH 30 kDa subunit)(PAF-AH subunit beta)(PAFAH subunit beta) [Source:UniProtKB/Swiss-Prot;Acc:P68402]	1575.92	1589.06	1794.2	2045.94	NA	NA	1643.49	1958.67	NA	1698.86	NA	1691.62	1529.68	2468.39	2054.83	1690	2105.41	1805.59	3069.93	2336.35
pig18209;pig18210	PON1	ENSSSCT00000016705		ENSSSCG00000015332		PON1	Serum paraoxonase/arylesterase 1 (PON 1)(EC 3.1.1.2)(EC 3.1.8.1)(Serum aryldialkylphosphatase 1)(A-esterase 1)(Aromatic esterase 1)(K-45) [Source:UniProtKB/Swiss-Prot;Acc:P27169]	NA	NA	1747.83	2080.84	NA	NA	1579.08	2028.86	NA	1582.35	1698.11	2008.61	NA	2414.96	1987.83	1612.91	2341.66	1943.63	5167.82	2690.32
pig19229;pig19230	FGFR1;FGFR1IIIC;LOC100153248	ENSSSCT00000017223	Ssc.17773|Ssc.24095	ENSSSCG00000015815	100153248|396569	LOC100153248|FGFR1IIIC	Similar to fibroblast growth factor receptor 1|FGF receptor	1843.17	1944.72	2265.92	2692.26	1677.12	NA	2062.2	2577.14	1588.38	2092.26	1841.7	2177.74	1645.33	3106.07	2698.48	1956.94	2515.74	2037.62	3834.65	2399.15
pig19755;pig19756	LOC100155066;OBFC2A	ENSSSCT00000017487	Ssc.18304	ENSSSCG00000016062	100155066	LOC100155066	Similar to oligonucleotide/oligosaccharide-binding fold containing 2A	NA	1540.14	1641.03	1891.51	NA	NA	1637.06	2054.59	NA	1785.95	1705.17	1890.18	NA	2417.45	2485.13	1807.81	2271.92	2088.39	5385.86	2900.44
pig20274;pig20275	C2ORF82;C2orf82;LOC100157430	ENSSSCT00000017743	Ssc.38719	ENSSSCG00000016294	100157430	LOC100157430	Similar to ASCL830	1562.46	1674.21	2268.93	2682.01	1541.99	NA	2360.32	2926.64	NA	1822.69	2113.02	2345.88	1561.67	2696.85	2454.84	1931.76	2225.68	1930.36	3038.65	2796.09
pig21051;pig21052	CRISPLD1;LOC100152961	ENSSSCT00000006765	Ssc.5995	ENSSSCG00000006171	100152961	LOC100152961	Similar to cysteine-rich secretory protein LCCL domain containing 1	NA	NA	1787.24	1765.52	2048.34	NA	1851.34	2427.17	NA	1759.11	1948.18	2319.11	NA	2887.2	2493.96	1776.74	2784.04	2367.24	6430.38	2930.31
pig21319;pig21320	LOC100151956;TBX19	ENSSSCT00000006904		ENSSSCG00000006299	100151956	TBX19	T-box transcription factor TBX19 (T-box protein 19)(T-box factor, pituitary) [Source:UniProtKB/Swiss-Prot;Acc:O60806]	NA	NA	1871.64	1960.55	1664.8	NA	1858.88	2492.99	NA	1728.36	1973.09	2255.99	NA	2789.32	2367.12	1720	3344.75	2699.31	7747.9	4465.07
pig21630;pig21631	CD5L;LOC100154019	ENSSSCT00000007071	Ssc.54568	ENSSSCG00000006455			Transcribed locus, moderately similar to XP_001929417.1 PREDICTED: similar to CD5 molecule-like [Sus scrofa]	1543.96	1619.34	2111.49	2556.91	NA	NA	2044.5	2362.19	NA	1821.07	2069.72	2235.09	NA	2642.04	2282.09	1963.95	2272.74	1957.75	7320.59	2890.51
pig21648;pig21649	C1ORF92;C1orf92;LOC100158094	ENSSSCT00000007079	Ssc.6616	ENSSSCG00000006462	100158094	LOC100158094	Similar to Leucine-rich repeat-containing protein C10orf92 homolog	1903.39	1972.96	1926.81	2515.86	1758.33	1709.59	2101.37	2493.29	1592.39	2004.61	1965.81	2112.82	1871.66	3082.74	2492.18	2221.81	2487.99	2129.64	4729.91	2598.41
pig21861;pig21862	RPS27;RPS27P13	ENSSSCT00000007185	Ssc.60050	ENSSSCG00000006558			Transcribed locus, strongly similar to NP_001021.1 ribosomal protein S27 [Homo sapiens]	1909.12	2153.94	2386.78	2691.39	2594.85	1655.24	2366.4	3172.44	1882.4	2981.07	2549.61	3109.38	1958.58	4061.25	3818.21	2466.32	5091.57	3587.72	16058.1	6078.34
pig21897;pig21898	LOC100157925;S100A3	ENSSSCT00000007207	Ssc.20492	ENSSSCG00000006579	100157925	LOC100157925	Similar to S100 calcium binding protein A3	1595.86	1773.42	1592.49	1865.39	NA	NA	1536.6	1869.79	NA	1766.25	1543.71	1860.96	1531.78	2582	2370.97	1752.89	2630.57	2185.43	5658.6	2908.36
pig22176;pig22177	ADAM30;LOC100156604	ENSSSCT00000007354		ENSSSCG00000006713	100156604	ADAM30	Disintegrin and metalloproteinase domain-containing protein 30 Precursor (ADAM 30)(EC 3.4.24.-) [Source:UniProtKB/Swiss-Prot;Acc:Q9UKF2]	1794.59	1905.99	2006.99	2325.43	1561.29	1582.26	1962.88	2298.39	1563.29	2103.53	1872.66	2189.1	1655.33	2521.33	2493.01	1983.81	2241.75	1807.78	2705.88	2598.14
pig23113;pig23114	LOC100152097;LOC100153320;LOC100155320;LOC100155751;LOC100157348	ENSSSCT00000001292		ENSSSCG00000001194	100152097|100155751|100155320|100157348|100153320	NULL	NULL	1692.84	1607.76	1577.68	1818.31	1562.96	NA	NA	2051.27	NA	1606.26	1632.85	1970.76	NA	2398.71	2064.57	NA	2785.6	2210.16	4662.73	3184.12
pig23115;pig23116	LOC100157759	ENSSSCT00000001293		ENSSSCG00000001195	100157759	NULL	NULL	NA	NA	NA	1767.51	1562.03	NA	1551.22	2046.95	NA	1683.53	1681.41	1994.07	NA	2486.68	2081.44	1587.38	2513.43	2231.79	4180.39	3395.9
pig23141;pig23142	LOC100152126;ZNF323	ENSSSCT00000001306		ENSSSCG00000001208	100152126	ZNF323	Zinc finger protein 323 [Source:UniProtKB/Swiss-Prot;Acc:Q96LW9]	1565.04	1577.1	1621.97	2200.79	NA	NA	1623.99	1968.26	NA	1614.96	1701.51	2001.26	NA	2431.86	2068.95	1670.03	2232.47	1970.05	3433.4	2435.65
pig23660;pig23661	AGER	ENSSSCT00000001589		ENSSSCG00000001437	396591	NP_001116690.1	advanced glycosylation end product-specific receptor [Source:RefSeq peptide;Acc:NP_001116690]	NA	NA	1683.69	1626.83	1528.19	NA	1576.36	2035.96	NA	1629.78	1759.16	2044.39	NA	2430.24	2085.32	1745.2	2474.94	2231.14	5662.69	2903.2
pig24200;pig24201	LOC100156754	ENSSSCT00000001883		ENSSSCG00000001687	100156754	NULL	NULL	1632.03	1725.95	1679.7	2018.95	NA	NA	1655.55	1944.16	NA	NA	1679.21	1881.99	NA	2302.54	2019.09	1676.38	2295.33	2040.64	4238.61	2899.94
pig24475;pig24476	FSD2	ENSSSCT00000002022		ENSSSCG00000001806		FSD2	Fibronectin type III and SPRY domain-containing protein 2 (SPRY domain-containing protein 1) [Source:UniProtKB/Swiss-Prot;Acc:A1L4K1]	1612.77	1834.62	1945.19	2126.19	1553.41	NA	1882.62	2269.62	NA	1814.81	1801.19	2052.59	1689.4	2631.4	2443.88	1933.12	2466.43	2284.14	4427.98	3048.81
pig24990;pig24991	LOC100155532	ENSSSCT00000002287		ENSSSCG00000002044	100155532	NULL	NULL	1606.94	1620.51	1783.08	1878.61	1910.75	NA	1741.8	2125.85	1527.9	1710.69	1879.84	2257.14	1585.22	2810.38	2525.18	1695.99	3507.78	2531.02	9700.67	3337.81
pig25538;pig25539	NUMB	ENSSSCT00000002606		ENSSSCG00000002342		NUMB	Protein numb homolog (h-Numb)(Protein S171) [Source:UniProtKB/Swiss-Prot;Acc:P49757]	NA	1693.21	1606.86	1867.08	NA	NA	1590.85	1955.25	NA	NA	1642.03	1951.53	NA	2088.28	1990.65	1596.7	2243.96	2028.67	3998.91	2595.31
pig25542;pig25543	MINA	ENSSSCT00000002608		ENSSSCG00000002344		MINA	MYC-induced nuclear antigen (Mineral dust-induced gene protein)(Nucleolar protein 52) [Source:UniProtKB/Swiss-Prot;Acc:Q8IUF8]	1909.91	1913.74	1963.31	2345.86	1615.24	NA	1900.97	2248.65	1569.21	2209.91	2030.38	2260.5	1819.33	3168.93	3040.74	2099.12	3097.19	2557.89	8556.8	3461.26
pig25554;pig25555	LOC100158136	ENSSSCT00000002614		ENSSSCG00000002350	100158136	NULL	NULL	1610	1650.99	NA	2002.69	NA	NA	1662.12	1950.34	NA	1705.14	1793.61	1986.3	1635.3	2422.3	2139.44	1802.49	2200.81	2042.54	3481.62	2370.46
pig25824;pig25825	SERPINA6	ENSSSCT00000002749	Ssc.3831	ENSSSCG00000002475	396736	SERPINA6	Serpin peptidase inhibitor, clade A (alpha-1 antiproteinase, antitrypsin), member 6	1733.65	1930.81	1714.61	2000.84	1648.22	NA	1731.24	2045.08	NA	1821.07	1793.36	1983.88	1576.22	2568.81	2427.75	1807.81	2442.55	2171.05	4421.69	2615.62
pig26044;pig26045	LOC100154761	ENSSSCT00000002857		ENSSSCG00000002572	100154761	NULL	NULL	1547.21	1673.6	1528.44	1744.81	1553.79	NA	NA	2056.24	NA	1645.41	1584.99	1899.15	NA	2274.28	1970.42	1644.08	2686.9	2188.02	6177.04	3157.84
pig26048;pig26049	MEG3	ENSSSCT00000002859	Ssc.6192	ENSSSCG00000002574	100144590	MEG3	Maternally expressed 3	NA	1566.41	1762.01	1814.33	1945.33	NA	1792.44	2270.01	NA	1805.32	1833.75	2108.94	NA	2562.07	2388.77	1611.42	2495.97	2169.28	4874.18	3057.22
pig26054;pig26055	DLK1	ENSSSCT00000002861	Ssc.33306	ENSSSCG00000002575	497066	DLK1	Delta-like 1 homolog (Drosophila)	NA	1728.94	1649.99	1919.74	NA	NA	1661.61	2171.3	NA	1950.13	1856.64	2123.82	NA	2566.93	2435.92	1755.59	2783.07	2384.49	5336.92	3110.32
pig26327;pig26328	GPR152	ENSSSCT00000014110		ENSSSCG00000012907		GPR152	Probable G-protein coupled receptor 152 (G-protein coupled receptor PGR5) [Source:UniProtKB/Swiss-Prot;Acc:Q8TDT2]	1678.17	1854.22	1601.78	1938.38	NA	NA	NA	1986.91	NA	1718.57	1597.9	1800.89	NA	2059.89	2092.51	1605.88	2166.04	1973.54	3136.32	2369.41
pig26819;pig26820	MPEG1	ENSSSCT00000014364	Ssc.48901	ENSSSCG00000013144			Transcribed locus, moderately similar to NP_001039929.1 macrophage expressed gene 1 [Bos taurus]	1535.12	1659.1	1616.76	1962.55	1571.72	NA	NA	1966.86	NA	1681.35	1582.66	1958.11	NA	2319.86	2181.96	1594.81	2798.21	2335.72	4336.4	2921.39
pig27102;pig27103	TRAF6	ENSSSCT00000014515	Ssc.23491	ENSSSCG00000013291	396629	TRAF6	TNF receptor-associated factor 6	1777.24	1986.74	1716.58	2279.46	1857.35	NA	1617.42	2153.51	1570.44	2119.59	1930.67	2233.41	1785.8	3111.01	3003.5	1975.16	3229.84	2564.82	5394.68	3133.34
pig27127;pig27128	EHF;Ehf	ENSSSCT00000014526	Ssc.25242	ENSSSCG00000013300			Transcribed locus, strongly similar to NP_031940.1 ets homologous factor [Mus musculus]	NA	1671.61	1902.91	2276.82	NA	1547.21	1912.25	2230.76	NA	1749.44	2142.74	2276.6	1590.36	2412.72	2192.74	1737.22	2209.05	2173.29	3967.84	2499.65
pig27387;pig27388	SBF2	ENSSSCT00000014649	Ssc.42470	ENSSSCG00000013409			Transcribed locus, strongly similar to NP_112224.1 SET binding factor 2 [Homo sapiens]	NA	1552.62	1590.76	1806.6	NA	NA	1624.52	1899.49	NA	1723.5	1776.58	1931.78	NA	2139.88	1917.06	1583.33	2186.05	2036.65	3894.05	2574.53
pig27391	SWAP70	ENSSSCT00000014651		ENSSSCG00000013410		SWAP70	Switch-associated protein 70 (SWAP-70) [Source:UniProtKB/Swiss-Prot;Acc:Q9UH65]	1710.22	1942.43	1783.08	1982.75	NA	NA	1707.79	2153.79	1530.53	1878.96	1918.82	2040.99	1596.01	2687.21	2328.94	1842.41	2425.23	1971.24	3517.7	2452.5
pig27659;pig27660	CLPP;Clpp	ENSSSCT00000014789	Ssc.19154	ENSSSCG00000013542			Transcribed locus, strongly similar to NP_059089.1 caseinolytic peptidase, ATP-dependent, proteolytic subunit precursor [Mus musculus]	1672	1924.72	1905.61	2113.15	NA	NA	1895.49	2267.04	1553.45	1861.47	2014.78	2172.57	1560.17	2552.31	2264.1	1710.89	2474.4	2181.34	2365.75	2878.44
pig27926;pig27927	S1PR2	ENSSSCT00000014922		ENSSSCG00000013658		S1PR2	Sphingosine 1-phosphate receptor 2 (S1P receptor 2)(S1P2)(Sphingosine 1-phosphate receptor Edg-5)(S1P receptor Edg-5)(Endothelial differentiation G-protein coupled receptor 5) [Source:UniProtKB/Swiss-Prot;Acc:O95136]	1727.06	1859.08	1802.86	2064.19	NA	NA	1730.76	2066.46	1535.11	1948.66	1830.22	2021.56	1676.29	2646.99	2464.56	1696.29	2319.24	2081.47	6083.91	2567.14
pig27940;pig27941	C3P1	ENSSSCT00000014929		ENSSSCG00000013665		C3P1	Complement C3-like protein LOC388503 [Source:UniProtKB/Swiss-Prot;Acc:Q6ZMU1]	1740.74	1896.55	2171.22	2434.56	1635.64	1674.42	2078.39	2428.46	NA	1845.42	2265.08	2269.9	1773.39	2920.11	2387.23	1938.47	2416.86	2259.5	4817.89	2753.61
pig28189;pig28190	CLEC17A	ENSSSCT00000015053	Ssc.30476	ENSSSCG00000013777			Transcribed locus, moderately similar to XP_001112388.1 PREDICTED: similar to C-type lectin domain family 4, member g, partial [Macaca mulatta]	1656.88	1788.2	1863.35	2200.07	1638.85	NA	1954.09	2324.66	NA	1764.17	2089.72	2270.56	1713.21	2934.93	2602.86	1798.05	2403.89	2209.44	5165.31	2562.2
pig28195;pig28196	PKN1	ENSSSCT00000015056	Ssc.60170	ENSSSCG00000013779			Transcribed locus, strongly similar to NP_002732.3 protein kinase N1 isoform 2 [Homo sapiens]	1811.62	2066.94	2396.61	2612.95	1733.21	1601.29	2350.55	2788.82	1565.59	2032.94	2570.44	2842.62	1954.72	3311.9	2785.75	2046.66	2791.46	2592.7	8164.66	3593.26
pig28716;pig28717	ADAMTS2	ENSSSCT00000015320		ENSSSCG00000014025		ADAMTS2	A disintegrin and metalloproteinase with thrombospondin motifs 2 Precursor (ADAMTS-2)(ADAM-TS 2)(ADAM-TS2)(EC 3.4.24.14)(Procollagen I/II amino propeptide-processing enzyme)(Procollagen I N-proteinase)(PC I-NP)(Procollagen N-endopeptidase)(pNPI) [Source:UniProtKB/Swiss-Prot;Acc:O95450]	1798.19	1999.95	1780.03	1893.84	1819.15	NA	1743.39	2214.31	1533	2023.29	1884.66	2330.76	1530.92	2707.39	2581.64	1816.89	3087.79	2607.82	10105.8	3140.94
pig28758;pig28759	RAB24	ENSSSCT00000015340		ENSSSCG00000014043		RAB24	Ras-related protein Rab-24 [Source:UniProtKB/Swiss-Prot;Acc:Q969Q5]	1908.42	2187.31	2172.5	2500.79	1810.09	1758.71	2241.62	2552.14	1857.61	2603.21	2436.69	2537.84	2225.66	3390.39	2856.07	2342.18	2696.81	2358.63	3980.6	3046.57
pig29007;pig29008	LYSMD3	ENSSSCT00000015461		ENSSSCG00000014154		LYSMD3	LysM and putative peptidoglycan-binding domain-containing protein 3 [Source:UniProtKB/Swiss-Prot;Acc:Q7Z3D4]	1668.06	1782.59	1614.98	1787.9	NA	NA	1653.71	2025.75	NA	1746.85	1730.72	1931.11	NA	2072.41	2004.15	1646.39	2392.21	2178.22	3408.49	2530.56
pig29457;pig29458	DNAJC18	ENSSSCT00000015685	Ssc.33659	ENSSSCG00000014356			Transcribed locus, strongly similar to NP_001015649.1 DnaJ (Hsp40) homolog, subfamily C, member 18 [Bos taurus]	1715.9	1924.14	1886.6	2476.69	1561.59	NA	1733.31	2029.59	NA	1897.65	1947.56	2169	1664.86	2495.34	2395.6	1932.56	2420.44	2163.93	3476.66	2418.37
pig29945;pig29946	TBC1D5	ENSSSCT00000012265		ENSSSCG00000011199		TBC1D5	TBC1 domain family member 5 [Source:UniProtKB/Swiss-Prot;Acc:Q92609]	NA	1708.36	1770.61	1946.31	1615.01	1570.95	1715.47	1965.56	NA	1837.75	1881.27	2104.12	1576.91	2342.2	2220.38	1910.7	2266.81	1978.28	3643.14	2531.53
pig30082;pig30083	LOC100156583;MYRIP	ENSSSCT00000012337		ENSSSCG00000011269	100156583	MYRIP	Rab effector MyRIP (Myosin-VIIa- and Rab-interacting protein)(Exophilin-8)(Slp homolog lacking C2 domains c)(SlaC2-c) [Source:UniProtKB/Swiss-Prot;Acc:Q8NFW9]	NA	1589.93	1714.61	1724.85	NA	NA	1707.58	2095.73	NA	1681.35	1833.75	1971.38	NA	2354.28	2080.14	1595.85	2294.39	1970.32	3034.03	2321.32
pig30240;pig30241	SMARCC1	ENSSSCT00000012417		ENSSSCG00000011340		SMARCC1	SWI/SNF complex subunit SMARCC1 (SWI/SNF-related matrix-associated actin-dependent regulator of chromatin subfamily C member 1)(SWI/SNF complex 155 kDa subunit)(BRG1-associated factor 155) [Source:UniProtKB/Swiss-Prot;Acc:Q92922]	1622.8	1805.88	1964.2	2253.49	1561.29	NA	1941.89	2311.2	NA	1853	2174.68	2344.85	1669.04	2637.28	2416.64	1877.81	2668.49	2277.21	4557.25	2689.53
pig30477;pig30478	SFMBT1;Sfmbt1	ENSSSCT00000012535	Ssc.60381	ENSSSCG00000011454			Transcribed locus, strongly similar to NP_062333.1 Scm-like with four mbt domains 1 [Mus musculus]	1651.4	1730.99	1547.14	1666.84	1569.31	NA	1535.86	2018.95	NA	1950.13	1738.41	2086.65	NA	2448.65	2502.86	1682.47	2742.49	2281.59	5495.29	2948.02
pig30495;pig30496	IL17RD	ENSSSCT00000012544		ENSSSCG00000011463		IL17RD	Interleukin-17 receptor D Precursor (IL-17 receptor D)(IL-17RD)(IL17Rhom)(Interleukin-17 receptor-like protein)(Sef homolog)(hSef) [Source:UniProtKB/Swiss-Prot;Acc:Q8NFM7]	1741.3	2038.08	1773.08	1868	NA	NA	1610.64	2011.74	NA	1876.96	1838.58	2012.11	1716.21	2794.52	2531.26	1771.14	2533.06	2276.26	4520.48	2964.87
pig30743;pig30744	ATG7	ENSSSCT00000012667		ENSSSCG00000011575		ATG7	Autophagy-related protein 7 (APG7-like)(Ubiquitin-activating enzyme E1-like protein)(hAGP7) [Source:UniProtKB/Swiss-Prot;Acc:O95352]	NA	1663.74	NA	1758.5	NA	NA	1611.29	1922.29	NA	1687.15	1721.97	1957.75	1546.04	2718	2105.95	1544.5	2357.32	2143.04	4354.18	2470.66
pig30745;pig30746	HRH1	ENSSSCT00000012668	Ssc.39254	ENSSSCG00000011576			Transcribed locus, moderately similar to NP_001091681.1 histamine receptor H1 [Homo sapiens]	1751.1	1829.33	NA	1956.99	NA	NA	1527.87	1919.8	NA	1718.09	1712.88	2004.14	1527.6	2433.26	2248.67	1648.67	2546.16	2297.45	4377.06	2769.62
pig30756;pig30757	TSEN2	ENSSSCT00000012673	Ssc.28474	ENSSSCG00000011580			Transcribed locus, moderately similar to NP_001138867.1 tRNA-intron nuclease 2 isoform 4 [Homo sapiens]	1988.06	2143.49	2260.78	2582.46	1758.33	1684.26	2101.75	2545.66	1695.89	2159.78	2368.06	2496.91	1833.79	3185.29	2899.11	2175.44	2964.54	2579.71	8857.64	3306.99
pig30957;pig30958	CLSTN2;LOC100157330	ENSSSCT00000012771		ENSSSCG00000011666	100157330	CLSTN2	Calsyntenin-2 Precursor (Alcadein-gamma)(Alc-gamma) [Source:UniProtKB/Swiss-Prot;Acc:Q9H4D0]	1740.74	1880.11	2089.04	2292.62	1627.3	1607.19	1921.9	2257.58	1545.29	2027.55	1998.94	2097.55	1657.42	2385.61	2311.66	1964.38	2216.2	2184.28	2373.57	2922.04
pig31191;pig31192	KLHL24	ENSSSCT00000012887		ENSSSCG00000011775		KLHL24	Kelch-like protein 24 (Kainate receptor-interacting protein for GluR6)(KRIP6)(Protein DRE1) [Source:UniProtKB/Swiss-Prot;Acc:Q6TFL4]	1745.29	2015.71	1871.84	2380.31	1755.41	NA	1868.17	2279.78	NA	2059.38	2108.94	2300.41	1566.99	2597.97	2743.5	1819.66	2927.49	2499.35	3293.36	2750.61
pig31217;pig31218	VPS8	ENSSSCT00000012900		ENSSSCG00000011788		VPS8	Vacuolar protein sorting-associated protein 8 homolog [Source:UniProtKB/Swiss-Prot;Acc:Q8N3P4]	1556.83	1814.22	1652.5	1958.78	NA	NA	1714.32	2079.9	NA	1574.3	1878.81	2143.89	1652.54	2260.76	2001.56	1645.54	2559.36	2403.31	4800.71	2594.35
pig31219;pig31220	C3ORF70;C3orf70	ENSSSCT00000012901		ENSSSCG00000011789		C3orf70	UPF0524 protein C3orf70 [Source:UniProtKB/Swiss-Prot;Acc:A6NLC5]	1600.92	1779.08	1606.26	1826.15	NA	NA	1590.24	1837.97	NA	1705.14	1695.99	1795.95	1570.84	2215.49	2035.14	1606.97	2086.78	1810.91	2418.03	2167.32
pig31464;pig31465	ARHGAP31;CDGAP	ENSSSCT00000013024	Ssc.50723	ENSSSCG00000011902			Transcribed locus, moderately similar to NP_065805.2 Cdc42 GTPase-activating protein [Homo sapiens]	1848.28	2146.3	1879.25	2035.66	1671.4	NA	1866.85	2297.61	NA	2125.43	2090.32	2345.26	1760.84	2719.91	2697.48	1795.51	3167.32	2585.28	9172.81	3053.81
pig31735;pig31736	BACH1	ENSSSCT00000013161	Ssc.47934	ENSSSCG00000012029			Transcribed locus, moderately similar to NP_001177.1 BTB and CNC homology 1 transcription factor isoform a [Homo sapiens]	1752.36	1921.83	1814.06	1900.92	1562.33	NA	1880.51	2230.03	NA	2025.08	2026.94	2308.61	NA	2326.75	2498.12	1742.78	3067.21	2596.64	5537.89	3200.49
pig31803;pig31804	KCNJ6	ENSSSCT00000013197		ENSSSCG00000012065		KCNJ6	G protein-activated inward rectifier potassium channel 2 (GIRK2)(Potassium channel, inwardly rectifying subfamily J member 6)(Inward rectifier K(+) channel Kir3.2)(KATP-2)(BIR1) [Source:UniProtKB/Swiss-Prot;Acc:P48051]	2051.79	2260.74	1605.69	1886.36	2043.99	1686.09	1648.22	1667.4	1572.42	2074.96	1638.41	1679.05	1898.42	2209.07	2116.05	2213.16	1914.15	1857.31	2557.28	2422.86
pig32016;pig32017	GNRH1	ENSSSCT00000010581	Ssc.16310	ENSSSCG00000009651	397516	GNRH1	Gonadotropin-releasing hormone 1 (luteinizing-releasing hormone)	1790.45	2050.55	1691.96	2083.31	NA	NA	1615.56	1983.56	NA	1888.21	1815.2	2085.89	1723.78	2477.99	2263.12	1866.67	2882.55	2285.14	5051.07	2883.03
pig32041;pig32042	LOC100153911;LOC100155126;STMN4	ENSSSCT00000010594	Ssc.17767|Ssc.74482	ENSSSCG00000009662	100155126|100153911	LOC100153911|LOC100155126	Similar to Stathmin-4 (Stathmin-like protein B3) (RB3)	1823.78	1987.86	1725.66	2100.29	NA	NA	1733.96	1954.91	1528.04	1910.12	1897.92	1949.44	1599.5	2308.9	2173.61	1870.51	2311.87	2163.93	3322.51	2511.93
pig32043;pig32044	LOC100152706;TRIM35	ENSSSCT00000010595	Ssc.73193	ENSSSCG00000009663	100152706	LOC100152706	Similar to Tripartite motif-containing protein 35 (Hemopoietic lineage switch protein 5)	1766.28	2023.26	1919.78	2225.57	1577.49	NA	1929.33	2269.88	NA	1864.17	2081.7	2296.3	1705.41	2353.9	2198.14	1834.9	2152.72	2101.96	3439.18	2634.06
pig32276;pig32277	LOC100153315;TCTN2	ENSSSCT00000010710	Ssc.15544	ENSSSCG00000009768	100153315	LOC100153315	Similar to tectonic family member 2	1673.39	1940.58	NA	1788.25	NA	NA	1565.6	1924.91	NA	1657.29	1744.46	1894.54	NA	2257.11	2177.16	1634.55	2519.45	2267.97	3117.75	2115.98
pig32539;pig32540	C12ORF30;C12orf30;LOC100155417	ENSSSCT00000010837	Ssc.34964	ENSSSCG00000009887	100155417	LOC100155417	Similar to TPR repeat-containing protein C12orf30 (p120)	1580.79	1861.09	1852.79	1961.84	1691.44	NA	1765.29	2177.82	1557.91	2055.01	2023.63	2197	1639.83	2790.6	2781.81	1866.92	2689.53	2277.21	7344.56	3203.09
pig32804;pig32805	LOC100157569;RNF185	ENSSSCT00000010976		ENSSSCG00000010019	100157569	NULL	NULL	NA	1689.76	1716.18	1947.36	NA	NA	1594.99	2099.26	NA	1552.24	1798.41	2110.35	NA	2342.97	2173.12	NA	2301.16	2241.02	3001.75	2348.81
pig33090;pig33091	LOC100152410;TARBP1	ENSSSCT00000011124		ENSSSCG00000010160	100152410	TARBP1	Probable methyltransferase TARBP1 (EC 2.1.1.-)(TAR RNA-binding protein 1)(TAR RNA-binding protein of 185 kDa)(TRP-185) [Source:UniProtKB/Swiss-Prot;Acc:Q13395]	NA	1756.16	1632.58	1837.41	NA	NA	1654.75	2020.85	NA	1601	1846.88	2168.65	NA	2234.66	2061.51	NA	2748.15	2267.2	4325.34	2737.55
pig33095;pig33096	C1ORF31;C1orf31	ENSSSCT00000011126		ENSSSCG00000010161		C1orf31	Uncharacterized protein C1orf31 [Source:UniProtKB/Swiss-Prot;Acc:Q5JTJ3]	2126.19	2324.03	2327.51	2530.21	1829.58	1982.39	2164.61	2557.44	1886.16	2327.71	2419.44	2552.68	2108.79	3542.6	3277.35	2197.56	3003.65	2607.01	6685.06	2896.94
pig33099;pig33100	LOC100157650;SLC35F3	ENSSSCT00000011128		ENSSSCG00000010162	100157650	SLC35F3	Solute carrier family 35 member F3 [Source:UniProtKB/Swiss-Prot;Acc:Q8IY50]	1655.33	1840.53	1753.47	1875.25	NA	NA	1699.41	2000.96	NA	1673.39	1803.29	1911.29	NA	2285.69	2041.81	1609.44	2374.41	2010.12	2775.69	2542.06
pig33101;pig33102	KCNK1;LOC100155230;LOC100156432	ENSSSCT00000011129	Ssc.6357	ENSSSCG00000010163	100156432	LOC100156432	Similar to Potassium channel, subfamily K, member 1	1742.92	1798.14	1546.77	1845.98	NA	NA	NA	1815.29	NA	1612.7	1614.75	1872.31	NA	2411.56	2014.83	1600.46	2364.51	2022.76	3026.97	2121.63
pig33120;pig33121	C1ORF124;C1orf124;LOC100155479	ENSSSCT00000011139	Ssc.48830	ENSSSCG00000010173	100155479	LOC100155479	Similar to Zinc finger RAD18 domain-containing protein C1orf124	1576.9	1715.29	1834.75	2077.81	1576.06	NA	1675.39	1964.45	NA	1920.81	1878.08	1959.19	1562.33	2440.28	2222.05	1745.91	2477.32	2099.61	3355.9	2505.66
pig33370;pig33371	DNAJC9	ENSSSCT00000011269	Ssc.20770	ENSSSCG00000010296			Transcribed locus, strongly similar to NP_056005.1 DnaJ homolog, subfamily C, member 9 [Homo sapiens]	1560.7	1717.83	1645.45	1850.39	NA	NA	1609.15	1939.83	NA	1859.45	1711.16	1901.17	NA	2144.8	2023.38	1643.44	2140.05	1944.11	2865.27	2273.14
pig33382;pig33383	USP54	ENSSSCT00000011275	Ssc.28920	ENSSSCG00000010302			Transcribed locus, moderately similar to XP_536391.2 PREDICTED: similar to ubiquitin specific protease 54 [Canis familiaris]	NA	1541.94	1568.13	1710.69	NA	NA	NA	1764.47	NA	1575.97	1615.71	1846.25	NA	2051.91	1871.65	1595.85	2123.03	1892.85	2725.56	2090.06
pig33652;pig33653	LOC100152276;MBL2	ENSSSCT00000011412	Ssc.15845	ENSSSCG00000010427	397230	MBL2	Mannose-binding lectin	NA	1551.49	1637.96	1935.64	NA	NA	NA	1808.41	NA	1567.2	1667.62	1818.86	NA	2138.53	1854.35	1583.33	2113.55	1900.44	3014.71	1994.94
pig33892	ENTPD7;LOC100157585	ENSSSCT00000011531		ENSSSCG00000010540	100157585	ENTPD7	Ectonucleoside triphosphate diphosphohydrolase 7 (NTPDase 7)(EC 3.6.1.-)(Lysosomal apyrase-like protein 1) [Source:UniProtKB/Swiss-Prot;Acc:Q9NQZ7]	1624.34	1817.84	1936.44	2054.46	1795.36	NA	1949.26	2276.12	NA	2149.76	2147.02	2417.81	1606.22	2974.96	2765.26	1740.58	2751.43	2572.3	9352.71	3549.82
pig33895;pig33896	COX15;LOC100156375	ENSSSCT00000011532	Ssc.22105	ENSSSCG00000010541	100156375	LOC100156375	Similar to COX15 homolog, cytochrome c oxidase assembly protein	1566.29	1624.43	1725.66	1986.08	NA	NA	1815.72	2216.39	NA	1839.92	2137.75	2272.08	1621.71	2602.28	2326.68	NA	2874.54	2428.11	4928.51	3261.28
pig33903;pig33904	CPN1;LOC100157984	ENSSSCT00000011536	Ssc.25224	ENSSSCG00000010545	100157984	LOC100157984	Similar to Carboxypeptidase N catalytic chain precursor (CPN) (Carboxypeptidase N polypeptide 1) (Carboxypeptidase N small subunit) (Lysine carboxypeptidase) (Arginine carboxypeptidase) (Kininase-1) (Serum carboxypeptidase N) (SCPN) (Anaphylatoxin	1556.04	1802.62	NA	1649.29	NA	NA	NA	1846.5	NA	1754.78	1620.66	1758.64	NA	2176.32	2082.51	1546.72	2085.5	2036.39	2623.65	2363.78
pig34168;pig34169	KCNK18	ENSSSCT00000011668		ENSSSCG00000010667		KCNK18	Potassium channel subfamily K member 18 (TWIK-related individual potassium channel)(TWIK-related spinal cord potassium channel) [Source:UniProtKB/Swiss-Prot;Acc:Q7Z418]	1624.84	1772.71	1916.11	2053.54	NA	NA	1765.12	2205.09	NA	1942.91	1957.54	2169.47	1654.28	2787.65	2513.89	1844.44	2411.54	2219.41	4443.59	2619.44
pig34174;pig34175	EMX2;LOC100152562	ENSSSCT00000011672		ENSSSCG00000010671	100152562	EMX2	Homeobox protein EMX2 (Empty spiracles homolog 2)(Empty spiracles-like protein 2) [Source:UniProtKB/Swiss-Prot;Acc:Q04743]	1810.58	1853.19	1664.84	1991.01	NA	NA	1628.08	2018.95	NA	1825.19	1750.42	1978.55	NA	2330.43	2306.93	1756.55	2461.1	2196.85	3199.03	2354.72
pig34453;pig34454	KIF25	ENSSSCT00000004441	Ssc.42176	ENSSSCG00000004016			Transcribed locus, moderately similar to XP_001489300.2 PREDICTED: similar to kinesin family member 25 [Equus caballus]	1621.5	1819.65	1975.03	2037.84	NA	NA	1863.19	2151.95	NA	1707.78	2133.58	2277.44	1628.41	2451.62	1992.09	1725.64	2497.41	2332.46	5199.68	2790.19
pig34459;pig34460	UNC93A	ENSSSCT00000004444	Ssc.12415	ENSSSCG00000004019			Transcribed locus, moderately similar to XP_855283.1 PREDICTED: similar to unc-93 homolog A [Canis familiaris]	1633.21	1786.77	1603.1	1849.11	NA	NA	1593.19	1800.92	NA	1703.17	1650.61	1888.3	1596.81	2370.57	1883.71	1662.87	2136.4	1973.87	2776.43	2314.1
pig34708;pig34709	ADAT2;LOC100154785	ENSSSCT00000004570	Ssc.7699	ENSSSCG00000004135	100154785	LOC100154785	Similar to deaminase domain containing 1	1551.46	1728.18	NA	1627.29	NA	NA	NA	1716.61	NA	1725.31	1718.03	1912.66	NA	2254.55	2118.88	1590.24	2657.71	2244.96	3207.43	2586.31
pig35775;pig35776	BCL2L10;LOC100153119	ENSSSCT00000005106		ENSSSCG00000004623	100153119	BCL2L10	Bcl-2-like protein 10 (Bcl2-L-10)(Apoptosis regulator Bcl-B)(Anti-apoptotic protein NrH) [Source:UniProtKB/Swiss-Prot;Acc:Q9HD36]	NA	1543.53	1556.95	1958.51	1546.61	NA	1528.8	2071.54	NA	NA	1785.66	2130.61	NA	2455.91	2138.43	NA	3228.56	2473.82	4994.36	2679.95
pig36337;pig36338	KIAA1468;LOC100157030	ENSSSCT00000005405		ENSSSCG00000004899	100157030	KIAA1468	LisH domain and HEAT repeat-containing protein KIAA1468 [Source:UniProtKB/Swiss-Prot;Acc:Q9P260]	1955.72	2162.93	2279.47	2626.15	1618.03	1670.34	2223.04	2672.38	1693.5	2178.89	2539.14	2694.57	1895	3100.36	2939.12	2009.75	2687.59	2308.42	4199.16	2700.84
pig36596;pig36597	ABHD12B	ENSSSCT00000005539		ENSSSCG00000005023		ABHD12B	Abhydrolase domain-containing protein 12B [Source:UniProtKB/Swiss-Prot;Acc:Q7Z5M8]	1636.65	1684.79	NA	1831.95	NA	NA	NA	1828.46	NA	1588.4	1659.95	1960.83	NA	2456.26	1947.13	1549.76	2801.26	2290.69	5284.86	2312.36
pig36848;pig36849	LOC100155302;LOC100156561	ENSSSCT00000005672		ENSSSCG00000005144	100156561|100155302	Q304V8_PIG	Interferon alpha-10 Precursor [Source:UniProtKB/TrEMBL;Acc:Q304V8]	NA	1598.7	1573.46	1873.14	NA	NA	1621.28	2178.45	NA	1694.91	1810.25	2049.6	NA	2098.28	1984.42	NA	2557.28	2132.95	2882.07	2335.26
pig36888;pig36889	LOC100157323;SLC24A2	ENSSSCT00000005695		ENSSSCG00000005167	100157323	SLC24A2	Sodium/potassium/calcium exchanger 2 Precursor (Na(+)/K(+)/Ca(2+)-exchange protein 2)(Retinal cone Na-Ca+K exchanger)(Solute carrier family 24 member 2) [Source:UniProtKB/Swiss-Prot;Acc:Q9UI40]	NA	1813.79	1996.95	2208.07	1554.94	1609.78	1957.19	2272.46	1547.55	1808.53	2117.88	2238.44	1764.06	2693.19	2246.36	1739.28	2321.03	1979.77	3336.59	2436.3
pig37407;pig37408	LOC100154081	ENSSSCT00000005965	Ssc.21267	ENSSSCG00000005422	100154081	LOC100154081	Similar to nipsnap homolog 3A	1679.36	1775.43	2181.81	2397.62	1817.58	1640.16	2108.34	2532.84	1677.83	2195.88	2534.93	2805.31	1902.74	3348.35	2934.55	2017.61	3138.5	2631.78	9747.45	3495.72
pig37877;pig37878	LOC100153888;LOC100154341;URM1	ENSSSCT00000006211	Ssc.2196	ENSSSCG00000005649	100153888	LOC100153888	Similar to ubiquitin related modifier 1 homolog	1767.52	1977.34	1657.84	1995.32	NA	NA	1571.47	1983.28	1602.37	1929.18	1898.71	2109.47	1609.49	2718	2399.72	1781.41	2787.9	2285.14	4168.36	2687.07
pig37884;pig37885	ODF2	ENSSSCT00000006214		ENSSSCG00000005651	100156735	ODF2	Outer dense fiber protein 2 (Outer dense fiber of sperm tails protein 2)(Cenexin) [Source:UniProtKB/Swiss-Prot;Acc:Q5BJF6]	1968.91	2041.56	1724.45	1890.29	1633.95	1553.72	1646.77	1982.44	1602.67	2019.9	1783.72	1954.55	1604.26	2512.06	2347.28	1921.28	2282.36	2185.03	3098.72	2401.03
pig37886;pig37887	GLE1	ENSSSCT00000006215	Ssc.74319|Ssc.64311	ENSSSCG00000005652			Transcribed locus, moderately similar to XP_001500730.2 PREDICTED: GLE1 RNA export mediator homolog (yeast) [Equus caballus]	1567.9	1592.51	1592.18	1891.51	NA	NA	1557.27	1834.26	NA	1660.85	1763.17	1891.12	NA	2242.35	1993.29	1630.89	2323.35	2063.24	2934.93	2380.75
pig38287;pig38288	COBRA1	ENSSSCT00000006425	Ssc.4220	ENSSSCG00000005846			Transcribed locus, strongly similar to NP_056271.2 cofactor of BRCA1 [Homo sapiens]	1635.08	1855.26	1870.1	2082.18	1565.1	1537.98	1871.59	2143.69	1531.7	1958.77	2027.15	2192.14	1775.08	2791.79	2407.86	1900.26	2603.25	2513.89	5108.57	2910.49
pig24171	LOC100153873	ENSSSCT00000001866|ENSSSCT00000001851	Ssc.74804	ENSSSCG00000001660|ENSSSCG00000001673		NULL	NULL	1539.86	1794.12	1831.93	2305.48	1565.45	NA	1781.54	2329.36	NA	1615.38	1903.93	2201.14	NA	2517.7	2276.9	1802.02	2841.38	2251	5318.44	2641.22
pig24186	LOC100152337;LOC100155084	ENSSSCT00000001874|ENSSSCT00000001880	Ssc.16915	ENSSSCG00000001684|ENSSSCG00000001679	100155084	LOC100155084|NULL	NULL|Similar to RANBP21	1527.99	1567.41	1744.76	2198.12	1568.28	NA	NA	1962.86	NA	2120.77	1806.62	2085.45	1589.83	2581.19	2517.29	1742.46	2396.7	2135.24	5074.02	2644.16
pig25528	LOC100154908;ZFYVE1	ENSSSCT00000002598|ENSSSCT00000002600	Ssc.23843	ENSSSCG00000002337|ENSSSCG00000002335		NULL	NULL|Transcribed locus, strongly similar to NP_067083.1 zinc finger, FYVE domain containing 1 isoform 1 [Homo sapiens]	NA	1709.69	1668.56	1892.58	1566.28	NA	NA	1887.32	NA	1706.11	NA	1893.64	NA	2283.49	2371.39	1653.62	2507.45	2052.28	3797.81	2417.3
pig29426	ETF1;Etf1	ENSSSCT00000015664|ENSSSCT00000015661	Ssc.56198	ENSSSCG00000014334|ENSSSCG00000014337		Q2F7Z3_PIG	Transcribed locus, strongly similar to NP_001008345.1 eukaryotic translation termination factor 1 [Rattus norvegicus]|Eukaryotic translation termination factor 1 Fragment [Source:UniProtKB/TrEMBL;Acc:Q2F7Z3]	NA	1843.78	2116.51	2218.96	1729.62	NA	1876.91	2491.57	NA	1789.33	2306.81	2568.91	NA	2674.64	2777.43	1803.87	3035.45	2230.25	5826.93	3469.04
pig12512;pig12513	CMPK1	ENSSSCT00000004297|ENSSSCT00000004298	Ssc.24276	ENSSSCG00000003885		KCY_PIG	Transcribed locus, strongly similar to NP_057392.1 UMP-CMP kinase 1 isoform a [Homo sapiens]|UMP-CMP kinase (EC 2.7.4.14)(Cytidylate kinase)(Deoxycytidylate kinase)(Cytidine monophosphate kinase)(Uridine monophosphate kinase)(Uridine monophosphate/cytidine monophosphate kinase)(UMP/CMP kinase)(UMP/CMPK) [Source:UniProtKB/Swiss-Prot;Acc:Q29561]	NA	NA	1991.19	2381.91	1867.26	NA	1840.7	2562.72	NA	2105.03	2181.96	2711.2	NA	3016.67	2772.53	1840.25	2961.71	2310.68	9947.09	3888.81
pig25793;pig25794	LOC100153515;PRIMA1	ENSSSCT00000002736|ENSSSCT00000002735		ENSSSCG00000002464	100153515	PRIMA1	Proline-rich membrane anchor 1 Precursor (PRiMA) [Source:UniProtKB/Swiss-Prot;Acc:Q86XR5]	NA	1579.75	1622.89	1859.11	NA	NA	1624.21	2050.29	NA	1733.94	1643.6	2053.35	NA	2264.39	2167.3	1580.16	2336.22	2110.81	5059.06	2907.29
pig27104;pig27105	TRAF6	ENSSSCT00000014515|ENSSSCT00000014516	Ssc.23491	ENSSSCG00000013291	396629	A7XUJ6_PIG|TRAF6	TNF receptor-associated factor 6|TNF receptor-associated factor 6 [Source:UniProtKB/TrEMBL;Acc:A7XUJ6]	1559.93	1730.05	2040.64	2175.75	1666.54	NA	2014.36	2501.16	NA	1697.75	2156.28	2316.28	NA	2921.66	2453.7	1660.23	2888.04	2449.65	7370.1	3429.71
pig28726	COL23A1	ENSSSCT00000015324|ENSSSCT00000015325		ENSSSCG00000014029		COL23A1	Collagen alpha-1(XXIII) chain [Source:UniProtKB/Swiss-Prot;Acc:Q86Y22]	1540.31	1783.14	1531.74	1818.31	NA	NA	NA	1943.82	NA	1595.49	1605.01	1922.52	NA	2024.62	1939.76	NA	2640.56	2188.02	5949.89	2361.19
pig31467;pig31468	ARHGAP31;CDGAP	ENSSSCT00000013025|ENSSSCT00000013024	Ssc.50723	ENSSSCG00000011902			Transcribed locus, moderately similar to NP_065805.2 Cdc42 GTPase-activating protein [Homo sapiens]	1994.31	2059.11	2172.5	2544.99	1529.51	NA	2141.99	2573.18	1738.26	2076.54	2181.43	2352.21	1659.85	2649.59	2614.55	1847.36	2898.68	2535.43	3696.53	3364.75
pig39604;pig39605	MADD	Ssc#S35322633	Ssc.3010				Transcribed locus, strongly similar to NP_001129416.1 MAP-kinase activating death domain-containing protein isoform j [Homo sapiens]	1800.59	1899.79	1935.54	2263.11	1528.85	1533.83	1971.15	2232.41	1540.86	1841	2238.04	2315.19	1605.26	2871.82	2191.71	1843.79	3232.07	2594.46	5999.82	3112.95
pig39609;pig39610	SLC12A9	Ssc#S17526374	Ssc.3017				Transcribed locus, strongly similar to NP_064631.2 solute carrier family 12 (potassium/chloride transporters), member 9 [Homo sapiens]	1737.28	2063.41	2031.95	2268.29	1619.32	1604.26	1957.02	2399.54	NA	1911.29	2262.49	2483.54	1887.92	3001.16	2403.1	1839.78	2761.07	2548.07	3550.52	2376.68
pig39897	SNRNP35;Snrnp35	Ssc#S35172002	Ssc.3634				Transcribed locus, strongly similar to NP_001014149.1 small nuclear ribonucleoprotein 35kDa (U11/U12) [Rattus norvegicus]	NA	1731.47	1693.26	2081.44	NA	NA	1752.74	1972.76	NA	1867.21	1930.92	2046.64	1614.41	2595.82	2063.92	1786.81	2868.91	2092.3	2757.3	2344.21
pig40153;pig40154	HAGH	Ssc#S35167868	Ssc.4222				Transcribed locus, strongly similar to NP_005317.2 hydroxyacylglutathione hydrolase isoform 1 [Homo sapiens]	1592.91	1903.35	1816.92	2047.26	NA	1540.64	1687.12	2191.96	1670.11	1969.67	2078.03	2224.68	1717.01	2701.22	2226.33	1852.25	2427.31	2074.61	2730.42	2423.96
pig40401;pig40402	PLSCR3;Plscr3	Ssc#S19545588	Ssc.4723				Transcribed locus, strongly similar to NP_001012139.1 phospholipid scramblase 3 [Rattus norvegicus]	1693.75	1915.25	1865.12	2120.34	1977.06	NA	1797.99	2323.53	NA	1871.62	2268.32	2304.4	1631.96	3098.82	2350.64	1653.62	2927	2620.02	5051.07	2539.04
pig40417;pig40418	TRRAP	Ssc#S19543910	Ssc.4749				Transcribed locus, strongly similar to NP_003487.1 transformation/transcription domain-associated protein [Homo sapiens]	1720.47	1914.15	1598.33	1981.84	NA	NA	1586.96	2087.95	1581.2	1948.92	1936.83	2036.09	NA	2396.99	2134.65	1686.6	2591.18	2101.57	3114.6	2302.19
pig46908;pig46909	DGCR6;Dgcr6	Ssc#S35170021	Ssc.16717				Transcribed locus, strongly similar to NP_034177.1 DiGeorge syndrome critical region gene 6 [Mus musculus]	NA	1677.9	2074.91	2265.66	1883.58	NA	2076.46	2570.05	1760.46	2253.49	2440.4	2572.36	1715.12	3217.07	2439.62	1641.91	4590.79	3488.01	5896.31	3629.77
pig49521	MRPL41	Ssc#S18385300	Ssc.22018				Transcribed locus, strongly similar to NP_001092835.1 mitochondrial ribosomal protein L41 [Bos taurus]	1696.39	1609.81	1977.86	NA	2595.7	1894.6	2192.74	2052.7	2408.74	1610.39	2410.8	2469.2	1810.68	1991.53	2351.74	NA	3315.76	3538.32	2457.32	3473.11
pig49551;pig49552	PLA2G10	Ssc#S23696959	Ssc.22078				Transcribed locus, moderately similar to NP_003552.1 phospholipase A2, group X precursor [Homo sapiens]	1612.47	1716.62	1839.2	2096.07	1533.59	NA	1804.96	2175.28	1542.33	1955.02	2284.69	2316.28	1752.3	2444.5	2299.24	1742.46	3356.53	2763.21	4923.24	3037.29
pig50595;pig50596	TBX2	Ssc#S34499713	Ssc.23784				Transcribed locus, strongly similar to NP_005985.3 T-box 2 [Homo sapiens]	1703.42	1929.84	1975.03	2443.7	1684.23	1567.44	1918.49	2327.7	NA	1888.21	2419.04	2523.78	1774.71	2640.51	2292.39	1723.21	3594.8	3021.16	6133.61	2600.46
pig65817;pig65818	TPR	Ssc#S23766940	Ssc.42337				Transcribed locus, strongly similar to NP_003283.2 nuclear pore complex-associated protein TPR [Homo sapiens]	1707.38	1579.75	1964.34	NA	2650.28	1640.4	2207.63	2082.24	2483.91	1635.81	2463.51	2513.16	2052.46	2150.03	2445.29	1547.68	2879.9	3234.38	2450.03	3144.61
pig77731	SLC23A1;SLC23A2;YSPL2	Ssc#S20116412	Ssc.57585		397367	SLC23A2	Solute carrier family 23 (nucleobase transporters), member 2	NA	NA	1821.72	NA	2805.09	1530.14	2035.96	2057.94	2134.11	NA	2626.29	2623.21	1827.09	2416.51	2116.68	1554.31	3177.45	3602.94	2572.39	3258.05
pig80072;pig80073	RAPGEFL1	Ssc#S17510192	Ssc.61006				Transcribed locus, strongly similar to NP_057423.1 Rap guanine nucleotide exchange factor (GEF)-like 1 [Homo sapiens]	1901.99	1599.56	2214.59	NA	3894.05	1768.96	2645.16	2684.19	2384.3	1671.56	3248.81	3111.01	2356.24	3202.11	3070.25	1627.24	3805.36	4307.52	3196.38	4285.71
GO enrichment
Annotation Cluster 1	Enrichment Score: 1.0515970195155013
Category	Term	Count	%	PValue	Genes	List Total	Pop Hits	Pop Total	Fold Enrichment	Bonferroni	Benjamini	FDR
UP_SEQ_FEATURE	lipid moiety-binding region:S-palmitoyl cysteine	5	4.31034	0.0225558	S1PR2, HRH1, PLSCR3, TGFA, GRIA3	114	181	19113	4.63143	0.999913	0.990692	27.3383
SP_PIR_KEYWORDS	palmitate	5	4.31034	0.0370056	S1PR2, HRH1, PLSCR3, TGFA, GRIA3	114	213	19235	3.96075	0.999544	0.923013	37.7591
KEGG_PATHWAY	hsa04080:Neuroactive ligand-receptor interaction	3	2.58621	0.2287	S1PR2, HRH1, GRIA3	19	256	5085	3.13631	0.999969	0.994448	90.706
SP_PIR_KEYWORDS	lipoprotein	6	5.17241	0.325702	S1PR2, HRH1, PLSCR3, TGFA, RAB24, GRIA3	114	642	19235	1.5769	1	0.949081	99.2955
Annotation Cluster 2	Enrichment Score: 0.9998752892195386
Category	Term	Count	%	PValue	Genes	List Total	Pop Hits	Pop Total	Fold Enrichment	Bonferroni	Benjamini	FDR
UP_SEQ_FEATURE	transmembrane region	39	33.6207	0.0364345	FGFR1, CLSTN2, MPEG1, KCNK18, RNF185, UNC93A, DLK1, IL17RD, C2ORF82, S1PR2, DNAJC18, CLEC17A, SLC23A1, HRH1, SLC23A2, SLC24A2, ENTPD7, SLC35F3, TGFA, ADAM30, SNRNP35, TCTN2, PRIMA1, ODZ1, LYSMD3, COX15, PGAP2, SLC12A9, COL23A1, MADD, GRIA3, KCNK1, GPR152, AGER, BCL2L10, KCNJ6, TMPRSS11D, PLXDC1, PLSCR3	114	4911	19113	1.33143	1	0.977724	40.5205
SP_PIR_KEYWORDS	transmembrane	39	33.6207	0.0397518	FGFR1, CLSTN2, MPEG1, KCNK18, RNF185, UNC93A, DLK1, IL17RD, C2ORF82, S1PR2, DNAJC18, CLEC17A, SLC23A1, HRH1, SLC23A2, SLC24A2, ENTPD7, SLC35F3, TGFA, ADAM30, SNRNP35, TCTN2, PRIMA1, ODZ1, LYSMD3, COX15, PGAP2, SLC12A9, COL23A1, MADD, GRIA3, KCNK1, GPR152, AGER, BCL2L10, KCNJ6, TMPRSS11D, PLXDC1, PLSCR3	114	4973	19235	1.32322	0.999745	0.808906	39.9547
UP_SEQ_FEATURE	topological domain:Extracellular	24	20.6897	0.0461926	FGFR1, SLC12A9, COL23A1, CLSTN2, MPEG1, GRIA3, DLK1, GPR152, AGER, IL17RD, S1PR2, HRH1, KCNJ6, TMPRSS11D, SLC24A2, PLXDC1, PLSCR3, TGFA, ADAM30, SNRNP35, TCTN2, PRIMA1, ODZ1, LYSMD3	114	2719	19113	1.47988	1	0.960511	48.4193
GOTERM_CC_FAT	GO:0016021~integral to membrane	42	36.2069	0.048008	FGFR1, CLSTN2, MPEG1, KCNK18, RNF185, UNC93A, DLK1, IL17RD, C2ORF82, S1PR2, DNAJC18, CLEC17A, SLC23A1, HRH1, SLC23A2, SLC24A2, ENTPD7, NUMB, TGFA, SLC35F3, ADAM30, GLE1, SNRNP35, TCTN2, PRIMA1, TPR, ODZ1, LYSMD3, COX15, PGAP2, SLC12A9, COL23A1, MADD, GRIA3, GPR152, KCNK1, AGER, BCL2L10, KCNJ6, TMPRSS11D, PLXDC1, PLSCR3	81	5297	12782	1.25122	0.999799	0.941406	45.2278
GOTERM_CC_FAT	GO:0031224~intrinsic to membrane	43	37.069	0.0527246	FGFR1, CLSTN2, MPEG1, KCNK18, RNF185, UNC93A, DLK1, IL17RD, C2ORF82, S1PR2, DNAJC18, CLEC17A, SLC23A1, HRH1, SLC23A2, SLC24A2, ENTPD7, NUMB, TGFA, SLC35F3, RAB24, ADAM30, GLE1, SNRNP35, TCTN2, PRIMA1, TPR, ODZ1, LYSMD3, COX15, PGAP2, SLC12A9, COL23A1, MADD, GRIA3, GPR152, KCNK1, AGER, BCL2L10, KCNJ6, TMPRSS11D, PLXDC1, PLSCR3	81	5485	12782	1.2371	0.999915	0.903928	48.4573
UP_SEQ_FEATURE	topological domain:Cytoplasmic	27	23.2759	0.0877865	FGFR1, CLSTN2, MPEG1, KCNK18, DLK1, IL17RD, S1PR2, HRH1, ENTPD7, SLC24A2, TGFA, ADAM30, TCTN2, SNRNP35, PRIMA1, ODZ1, LYSMD3, SLC12A9, COL23A1, GRIA3, KCNK1, GPR152, AGER, KCNJ6, TMPRSS11D, PLXDC1, PLSCR3	114	3374	19113	1.34166	1	0.9954	72.3673
SP_PIR_KEYWORDS	membrane	44	37.931	0.124188	FGFR1, CLSTN2, MPEG1, KCNK18, RNF185, UNC93A, DLK1, IL17RD, C2ORF82, S1PR2, DNAJC18, CLEC17A, SLC23A1, HRH1, SLC23A2, SLC24A2, ENTPD7, NUMB, TGFA, SLC35F3, RAB24, ADAM30, SNRNP35, TCTN2, PRIMA1, TPR, ODZ1, LYSMD3, COX15, PGAP2, SLC12A9, COL23A1, SWAP70, MADD, GRIA3, GPR152, KCNK1, AGER, BCL2L10, KCNJ6, TMPRSS11D, SBF2, PLXDC1, PLSCR3	114	6256	19235	1.18671	1	0.914497	81.1271
SP_PIR_KEYWORDS	glycoprotein	31	26.7241	0.174227	FGFR1, CLSTN2, MPEG1, KCNK18, UNC93A, DLK1, IL17RD, CPN1, S1PR2, SLC23A1, HRH1, SLC23A2, SERPINA6, SLC24A2, ENTPD7, TGFA, ADAM30, TCTN2, PRIMA1, ODZ1, LYSMD3, SLC12A9, PLA2G10, GRIA3, KCNK1, ANXA4, AGER, TMPRSS11D, PLXDC1, PON1, ADAMTS2	114	4318	19235	1.21134	1	0.885777	90.9935
UP_SEQ_FEATURE	glycosylation site:N-linked (GlcNAc...)	29	25	0.236161	FGFR1, CLSTN2, MPEG1, KCNK18, UNC93A, DLK1, IL17RD, S1PR2, HRH1, SLC23A1, SERPINA6, SLC23A2, ENTPD7, SLC24A2, TGFA, ADAM30, TCTN2, PRIMA1, ODZ1, LYSMD3, SLC12A9, PLA2G10, GRIA3, KCNK1, AGER, TMPRSS11D, PLXDC1, PON1, ADAMTS2	114	4129	19113	1.17754	1	0.999956	97.6973
GOTERM_CC_FAT	GO:0005886~plasma membrane	27	23.2759	0.319145	FGFR1, CLSTN2, UNC93A, IL17RD, S1PR2, SLC23A1, HRH1, SLC23A2, NUMB, TGFA, SNRNP35, PRIMA1, TPR, ODZ1, SLC12A9, COL23A1, MADD, SWAP70, PKN1, GRIA3, KCNK1, GPR152, AGER, ARHGAP31, KCNJ6, TMPRSS11D, PLSCR3	81	3777	12782	1.12806	1	0.996081	99.0937
SP_PIR_KEYWORDS	cell membrane	15	12.931	0.413792	COL23A1, SLC12A9, CLSTN2, SWAP70, UNC93A, GRIA3, GPR152, IL17RD, AGER, S1PR2, HRH1, TMPRSS11D, TGFA, SNRNP35, PRIMA1	114	2194	19235	1.15356	1	0.966785	99.8788
Annotation Cluster 3	Enrichment Score: 0.9430936008253116
Category	Term	Count	%	PValue	Genes	List Total	Pop Hits	Pop Total	Fold Enrichment	Bonferroni	Benjamini	FDR
GOTERM_BP_FAT	GO:0000187~activation of MAPK activity	4	3.44828	0.0153165	S1PR2, MADD, TGFA, PKN1	87	82	13528	7.58509	0.999993	0.999993	21.0044
GOTERM_BP_FAT	GO:0043406~positive regulation of MAP kinase activity	4	3.44828	0.0271376	S1PR2, MADD, TGFA, PKN1	87	102	13528	6.09781	1	0.999975	34.3131
GOTERM_BP_FAT	GO:0000165~MAPKKK cascade	5	4.31034	0.0296908	S1PR2, FGFR1, MADD, TGFA, PKN1	87	184	13528	4.22539	1	0.999568	36.8977
GOTERM_BP_FAT	GO:0007243~protein kinase cascade	7	6.03448	0.0303218	S1PR2, FGFR1, MADD, TGFA, PKN1, TRAF6, AGER	87	370	13528	2.94178	1	0.997355	37.5217
GOTERM_BP_FAT	GO:0045860~positive regulation of protein kinase activity	5	4.31034	0.0536425	S1PR2, MADD, TGFA, PKN1, TRAF6	87	223	13528	3.48642	1	0.991114	56.9246
GOTERM_BP_FAT	GO:0033674~positive regulation of kinase activity	5	4.31034	0.0595533	S1PR2, MADD, TGFA, PKN1, TRAF6	87	231	13528	3.36568	1	0.991208	60.8561
GOTERM_BP_FAT	GO:0043405~regulation of MAP kinase activity	4	3.44828	0.0607296	S1PR2, MADD, TGFA, PKN1	87	141	13528	4.41118	1	0.982143	61.5973
GOTERM_BP_FAT	GO:0051347~positive regulation of transferase activity	5	4.31034	0.0666029	S1PR2, MADD, TGFA, PKN1, TRAF6	87	240	13528	3.23946	1	0.983223	65.1062
GOTERM_BP_FAT	GO:0044093~positive regulation of molecular function	8	6.89655	0.0788906	S1PR2, HRH1, MADD, PON1, TGFA, PKN1, TRAF6, BCL2L10	87	586	13528	2.12279	1	0.985358	71.5007
GOTERM_BP_FAT	GO:0007242~intracellular signaling cascade	13	11.2069	0.0995203	FGFR1, PGAP2, MADD, STMN4, PKN1, AGER, S1PR2, ARHGAP31, HRH1, RAB24, TGFA, TRAF6, RAPGEFL1	87	1256	13528	1.60942	1	0.98579	79.8366
GOTERM_BP_FAT	GO:0043085~positive regulation of catalytic activity	7	6.03448	0.113112	S1PR2, HRH1, MADD, TGFA, PKN1, TRAF6, BCL2L10	87	520	13528	2.09319	1	0.99022	84.0166
GOTERM_BP_FAT	GO:0006796~phosphate metabolic process	10	8.62069	0.164285	S1PR2, C2ORF79, FGFR1, MADD, SBF2, PNCK, TGFA, PKN1, PTPDC1, COX15	87	973	13528	1.59809	1	0.996053	93.5525
GOTERM_BP_FAT	GO:0006793~phosphorus metabolic process	10	8.62069	0.164285	S1PR2, C2ORF79, FGFR1, MADD, SBF2, PNCK, TGFA, PKN1, PTPDC1, COX15	87	973	13528	1.59809	1	0.996053	93.5525
GOTERM_BP_FAT	GO:0045859~regulation of protein kinase activity	5	4.31034	0.176724	S1PR2, MADD, TGFA, PKN1, TRAF6	87	345	13528	2.25354	1	0.996124	94.8724
GOTERM_BP_FAT	GO:0043549~regulation of kinase activity	5	4.31034	0.192	S1PR2, MADD, TGFA, PKN1, TRAF6	87	357	13528	2.17779	1	0.995827	96.1482
GOTERM_BP_FAT	GO:0051338~regulation of transferase activity	5	4.31034	0.211663	S1PR2, MADD, TGFA, PKN1, TRAF6	87	372	13528	2.08998	1	0.995452	97.3563
GOTERM_BP_FAT	GO:0008284~positive regulation of cell proliferation	5	4.31034	0.269387	S1PR2, FGFR1, TBX2, TGFA, AGER	87	414	13528	1.87795	1	0.997642	99.1725
GOTERM_BP_FAT	GO:0042325~regulation of phosphorylation	5	4.31034	0.344131	S1PR2, MADD, TGFA, PKN1, TRAF6	87	466	13528	1.66839	1	0.999011	99.8409
GOTERM_BP_FAT	GO:0051174~regulation of phosphorus metabolic process	5	4.31034	0.371762	S1PR2, MADD, TGFA, PKN1, TRAF6	87	485	13528	1.60303	1	0.999113	99.9175
GOTERM_BP_FAT	GO:0019220~regulation of phosphate metabolic process	5	4.31034	0.371762	S1PR2, MADD, TGFA, PKN1, TRAF6	87	485	13528	1.60303	1	0.999113	99.9175
GOTERM_BP_FAT	GO:0016310~phosphorylation	7	6.03448	0.399508	S1PR2, FGFR1, MADD, PNCK, TGFA, PKN1, COX15	87	800	13528	1.36057	1	0.9994	99.9586
GOTERM_BP_FAT	GO:0006468~protein amino acid phosphorylation	6	5.17241	0.419264	S1PR2, FGFR1, MADD, PNCK, TGFA, PKN1	87	667	13528	1.39875	1	0.999358	99.9752
Annotation Cluster 4	Enrichment Score: 0.9169893254103538
Category	Term	Count	%	PValue	Genes	List Total	Pop Hits	Pop Total	Fold Enrichment	Bonferroni	Benjamini	FDR
GOTERM_BP_FAT	GO:0006399~tRNA metabolic process	4	3.44828	0.0392686	URM1, ADAT2, TSEN2, TPR	87	118	13528	5.27099	1	0.994188	45.7706
SP_PIR_KEYWORDS	trna processing	3	2.58621	0.0590857	URM1, ADAT2, TSEN2	114	67	19235	7.55499	0.999996	0.830499	53.5054
GOTERM_BP_FAT	GO:0008033~tRNA processing	3	2.58621	0.0842023	URM1, ADAT2, TSEN2	87	76	13528	6.13793	1	0.981486	73.9104
GOTERM_BP_FAT	GO:0034660~ncRNA metabolic process	4	3.44828	0.180118	URM1, ADAT2, TSEN2, TPR	87	230	13528	2.70425	1	0.995782	95.186
GOTERM_BP_FAT	GO:0006396~RNA processing	6	5.17241	0.267866	TARBP1, ZFC3H1, URM1, ADAT2, SNRNP35, TSEN2	87	547	13528	1.7056	1	0.997896	99.1458
GOTERM_BP_FAT	GO:0034470~ncRNA processing	3	2.58621	0.333994	URM1, ADAT2, TSEN2	87	187	13528	2.49456	1	0.999193	99.7988
Annotation Cluster 5	Enrichment Score: 0.851165733079334
Category	Term	Count	%	PValue	Genes	List Total	Pop Hits	Pop Total	Fold Enrichment	Bonferroni	Benjamini	FDR
GOTERM_CC_FAT	GO:0005624~membrane fraction	9	7.75862	0.132532	FGFR1, SLC23A1, SLC23A2, SLC24A2, PON1, GRIA3, TRAF6, RAPGEFL1, BCL2L10	81	809	12782	1.75553	1	0.983418	82.442
GOTERM_CC_FAT	GO:0000267~cell fraction	11	9.48276	0.137594	FGFR1, SLC23A1, GNRH1, SLC23A2, SLC24A2, PON1, GRIA3, DLK1, TRAF6, RAPGEFL1, BCL2L10	81	1083	12782	1.6028	1	0.959284	83.6553
GOTERM_CC_FAT	GO:0005626~insoluble fraction	9	7.75862	0.153313	FGFR1, SLC23A1, SLC23A2, SLC24A2, PON1, GRIA3, TRAF6, RAPGEFL1, BCL2L10	81	839	12782	1.69276	1	0.959199	86.9495
Annotation Cluster 6	Enrichment Score: 0.8493977862052531
Category	Term	Count	%	PValue	Genes	List Total	Pop Hits	Pop Total	Fold Enrichment	Bonferroni	Benjamini	FDR
GOTERM_MF_FAT	GO:0031420~alkali metal ion binding	6	5.17241	0.0184525	SLC23A1, KCNJ6, SLC23A2, SLC24A2, KCNK18, KCNK1	88	228	12983	3.88248	0.98957	0.98957	21.4304
SP_PIR_KEYWORDS	potassium transport	4	3.44828	0.0303274	KCNJ6, SLC24A2, KCNK18, KCNK1	114	115	19235	5.8688	0.998131	0.998131	32.1083
SP_PIR_KEYWORDS	potassium	4	3.44828	0.0381906	KCNJ6, SLC24A2, KCNK18, KCNK1	114	126	19235	5.35645	0.999645	0.862742	38.7155
GOTERM_BP_FAT	GO:0015672~monovalent inorganic cation transport	6	5.17241	0.0518776	SLC23A1, KCNJ6, SLC23A2, SLC24A2, KCNK18, KCNK1	87	318	13528	2.93385	1	0.994107	55.6809
GOTERM_MF_FAT	GO:0030955~potassium ion binding	4	3.44828	0.0545941	KCNJ6, SLC24A2, KCNK18, KCNK1	88	128	12983	4.61044	0.999999	0.989795	51.6646
GOTERM_MF_FAT	GO:0015293~symporter activity	4	3.44828	0.0642772	SLC23A1, SLC12A9, SLC23A2, SLC24A2	88	137	12983	4.30756	1	0.982909	57.6975
GOTERM_BP_FAT	GO:0006813~potassium ion transport	4	3.44828	0.081792	KCNJ6, SLC24A2, KCNK18, KCNK1	87	160	13528	3.88736	1	0.983623	72.8416
SP_PIR_KEYWORDS	transport	15	12.931	0.111461	SLC12A9, KCNK18, GRIA3, KCNK1, SLC23A1, KCNJ6, SERPINA6, SLC23A2, ATG7, SLC24A2, RAB24, SLC35F3, SNRNP35, GLE1, TPR	114	1670	19235	1.51552	1	0.95088	77.3729
SP_PIR_KEYWORDS	ion transport	7	6.03448	0.125184	SLC23A1, KCNJ6, SLC23A2, SLC24A2, KCNK18, GRIA3, KCNK1	114	578	19235	2.04342	1	0.877387	81.3952
GOTERM_MF_FAT	GO:0015294~solute:cation symporter activity	3	2.58621	0.133219	SLC23A1, SLC12A9, SLC23A2	88	95	12983	4.65897	1	0.997085	84.2983
SP_PIR_KEYWORDS	Symport	3	2.58621	0.138635	SLC23A1, SLC23A2, SLC24A2	114	111	19235	4.56022	1	0.886345	84.6889
SP_PIR_KEYWORDS	Sodium	3	2.58621	0.148723	SLC23A1, SLC23A2, SLC24A2	114	116	19235	4.36366	1	0.871647	86.797
SP_PIR_KEYWORDS	Sodium transport	3	2.58621	0.148723	SLC23A1, SLC23A2, SLC24A2	114	116	19235	4.36366	1	0.871647	86.797
GOTERM_BP_FAT	GO:0055085~transmembrane transport	7	6.03448	0.153458	SLC23A1, SLC12A9, SLC23A2, SLC24A2, SNRNP35, GLE1, TPR	87	569	13528	1.91293	1	0.996245	92.1514
GOTERM_BP_FAT	GO:0030001~metal ion transport	6	5.17241	0.173776	SLC23A1, KCNJ6, SLC23A2, SLC24A2, KCNK18, KCNK1	87	465	13528	2.00638	1	0.99652	94.5847
GOTERM_MF_FAT	GO:0046873~metal ion transmembrane transporter activity	5	4.31034	0.177653	SLC23A1, KCNJ6, SLC24A2, KCNK18, KCNK1	88	328	12983	2.249	1	0.995129	92.0568
GOTERM_MF_FAT	GO:0031402~sodium ion binding	3	2.58621	0.18485	SLC23A1, SLC23A2, SLC24A2	88	117	12983	3.78293	1	0.989456	92.9114
GOTERM_BP_FAT	GO:0006814~sodium ion transport	3	2.58621	0.200219	SLC23A1, SLC23A2, SLC24A2	87	130	13528	3.58833	1	0.994592	96.7052
GOTERM_MF_FAT	GO:0022834~ligand-gated channel activity	3	2.58621	0.209192	KCNJ6, GRIA3, KCNK1	88	127	12983	3.48506	1	0.983547	95.2131
GOTERM_MF_FAT	GO:0015276~ligand-gated ion channel activity	3	2.58621	0.209192	KCNJ6, GRIA3, KCNK1	88	127	12983	3.48506	1	0.983547	95.2131
GOTERM_BP_FAT	GO:0006811~ion transport	8	6.89655	0.215513	MBL2, SLC23A1, KCNJ6, SLC23A2, SLC24A2, KCNK18, GRIA3, KCNK1	87	768	13528	1.61973	1	0.995237	97.5468
GOTERM_MF_FAT	GO:0005267~potassium channel activity	3	2.58621	0.223957	KCNJ6, KCNK18, KCNK1	88	133	12983	3.32784	1	0.984097	96.2498
GOTERM_MF_FAT	GO:0005216~ion channel activity	5	4.31034	0.259376	KCNJ6, SLC24A2, KCNK18, GRIA3, KCNK1	88	386	12983	1.91106	1	0.983209	97.952
GOTERM_BP_FAT	GO:0006812~cation transport	6	5.17241	0.275202	SLC23A1, KCNJ6, SLC23A2, SLC24A2, KCNK18, KCNK1	87	553	13528	1.6871	1	0.997648	99.2676
GOTERM_MF_FAT	GO:0022838~substrate specific channel activity	5	4.31034	0.277211	KCNJ6, SLC24A2, KCNK18, GRIA3, KCNK1	88	398	12983	1.85344	1	0.981255	98.5064
GOTERM_MF_FAT	GO:0005261~cation channel activity	4	3.44828	0.280233	KCNJ6, SLC24A2, KCNK18, KCNK1	88	275	12983	2.14595	1	0.974318	98.5852
SP_PIR_KEYWORDS	ionic channel	4	3.44828	0.287267	KCNJ6, KCNK18, GRIA3, KCNK1	114	318	19235	2.12237	1	0.943782	98.5855
GOTERM_MF_FAT	GO:0015267~channel activity	5	4.31034	0.298274	KCNJ6, SLC24A2, KCNK18, GRIA3, KCNK1	88	412	12983	1.79046	1	0.973108	98.9816
GOTERM_MF_FAT	GO:0022803~passive transmembrane transporter activity	5	4.31034	0.299787	KCNJ6, SLC24A2, KCNK18, GRIA3, KCNK1	88	413	12983	1.78613	1	0.969573	99.0097
GOTERM_MF_FAT	GO:0022836~gated channel activity	4	3.44828	0.344535	KCNJ6, KCNK18, GRIA3, KCNK1	88	310	12983	1.90367	1	0.981322	99.5789
Annotation Cluster 7	Enrichment Score: 0.7884983878351572
Category	Term	Count	%	PValue	Genes	List Total	Pop Hits	Pop Total	Fold Enrichment	Bonferroni	Benjamini	FDR
GOTERM_CC_FAT	GO:0044421~extracellular region part	13	11.2069	0.0157909	C3P1, MBL2, GNRH1, CD5L, GRIA3, DLK1, AGER, CPN1, SERPINA6, DGCR6, PON1, TGFA, ADAMTS2	81	960	12782	2.13691	0.936303	0.936303	17.6965
GOTERM_CC_FAT	GO:0005615~extracellular space	10	8.62069	0.0268945	C3P1, MBL2, GNRH1, SERPINA6, PON1, TGFA, CD5L, DLK1, AGER, CPN1	81	685	12782	2.30369	0.991053	0.905413	28.3648
GOTERM_CC_FAT	GO:0005576~extracellular region	18	15.5172	0.115916	C3P1, MBL2, PLA2G10, GNRH1, CD5L, GRIA3, DLK1, AGER, CPN1, CRISPLD1, TMPRSS11D, SERPINA6, DGCR6, PLXDC1, PON1, TGFA, ODZ1, ADAMTS2	81	2010	12782	1.41316	1	0.985917	77.8535
SP_PIR_KEYWORDS	signal	23	19.8276	0.266536	MBL2, FGFR1, CLSTN2, PLA2G10, GNRH1, MPEG1, GRIA3, CD5L, DLK1, IL17RD, AGER, CPN1, C2ORF82, CRISPLD1, SERPINA6, SLC24A2, PLXDC1, PON1, TGFA, ADAM30, TCTN2, PRIMA1, ADAMTS2	114	3250	19235	1.19408	1	0.936031	97.9714
UP_SEQ_FEATURE	signal peptide	23	19.8276	0.276895	MBL2, FGFR1, CLSTN2, PLA2G10, GNRH1, MPEG1, GRIA3, CD5L, DLK1, IL17RD, AGER, CPN1, C2ORF82, CRISPLD1, SERPINA6, SLC24A2, PLXDC1, PON1, TGFA, ADAM30, TCTN2, PRIMA1, ADAMTS2	114	3250	19113	1.1865	1	0.999985	98.9308
SP_PIR_KEYWORDS	Secreted	13	11.2069	0.288235	MBL2, GNRH1, PLA2G10, CD5L, AGER, CPN1, CRISPLD1, SERPINA6, TMPRSS11D, PLXDC1, PON1, TGFA, ADAMTS2	114	1689	19235	1.29868	1	0.937617	98.6094
SP_PIR_KEYWORDS	disulfide bond	17	14.6552	0.661235	MBL2, FGFR1, PLA2G10, CD5L, DLK1, GPR152, AGER, CPN1, HRH1, CRISPLD1, TMPRSS11D, PON1, TGFA, ADAM30, PRIMA1, ODZ1, ADAMTS2	114	2924	19235	0.980977	1	0.995419	99.9999
UP_SEQ_FEATURE	disulfide bond	16	13.7931	0.710604	MBL2, FGFR1, PLA2G10, CD5L, DLK1, GPR152, AGER, CPN1, HRH1, CRISPLD1, TMPRSS11D, PON1, TGFA, ADAM30, ODZ1, ADAMTS2	114	2819	19113	0.951588	1	1	100
Annotation Cluster 8	Enrichment Score: 0.7384433244077191
Category	Term	Count	%	PValue	Genes	List Total	Pop Hits	Pop Total	Fold Enrichment	Bonferroni	Benjamini	FDR
GOTERM_BP_FAT	GO:0002250~adaptive immune response	3	2.58621	0.0861026	MBL2, SWAP70, TRAF6	87	77	13528	6.05822	1	0.97886	74.7253
GOTERM_BP_FAT	GO:0002460~adaptive immune response based on somatic recombination of immune receptors built from immunoglobulin superfamily domains	3	2.58621	0.0861026	MBL2, SWAP70, TRAF6	87	77	13528	6.05822	1	0.97886	74.7253
GOTERM_BP_FAT	GO:0006955~immune response	4	3.44828	0.821557	MBL2, SWAP70, TRAF6, ODZ1	87	690	13528	0.901416	1	0.999999	100
Annotation Cluster 9	Enrichment Score: 0.6441418481613538
Category	Term	Count	%	PValue	Genes	List Total	Pop Hits	Pop Total	Fold Enrichment	Bonferroni	Benjamini	FDR
INTERPRO	IPR000742:EGF-like, type 3	4	3.44828	0.123928	TGFA, ADAM30, DLK1, ODZ1	106	194	16659	3.24042	1	1	82.7115
SP_PIR_KEYWORDS	egf-like domain	4	3.44828	0.153441	TGFA, ADAM30, DLK1, ODZ1	114	230	19235	2.9344	1	0.864516	87.6883
INTERPRO	IPR006209:EGF	3	2.58621	0.190861	TGFA, DLK1, ODZ1	106	127	16659	3.71245	1	1	93.9762
INTERPRO	IPR013032:EGF-like region, conserved site	4	3.44828	0.281405	TGFA, ADAM30, DLK1, ODZ1	106	293	16659	2.14553	1	1	98.7521
INTERPRO	IPR006210:EGF-like	3	2.58621	0.362265	TGFA, DLK1, ODZ1	106	201	16659	2.34568	1	1	99.7439
SMART	SM00181:EGF	3	2.58621	0.368946	TGFA, DLK1, ODZ1	59	201	9079	2.29674	1	1	99.1589
Annotation Cluster 10	Enrichment Score: 0.5801425828536078
Category	Term	Count	%	PValue	Genes	List Total	Pop Hits	Pop Total	Fold Enrichment	Bonferroni	Benjamini	FDR
GOTERM_BP_FAT	GO:0006916~anti-apoptosis	5	4.31034	0.0422073	PGAP2, GNRH1, TRAF6, ANXA4, BCL2L10	87	206	13528	3.77413	1	0.991347	48.2498
SP_PIR_KEYWORDS	Apoptosis	5	4.31034	0.186227	TRIM35, MRPL41, MADD, CD5L, BCL2L10	114	381	19235	2.21428	1	0.877783	92.5077
GOTERM_BP_FAT	GO:0043066~negative regulation of apoptosis	5	4.31034	0.188141	PGAP2, GNRH1, TRAF6, ANXA4, BCL2L10	87	354	13528	2.19625	1	0.996079	95.8574
GOTERM_BP_FAT	GO:0043069~negative regulation of programmed cell death	5	4.31034	0.194586	PGAP2, GNRH1, TRAF6, ANXA4, BCL2L10	87	359	13528	2.16566	1	0.995402	96.3324
GOTERM_BP_FAT	GO:0060548~negative regulation of cell death	5	4.31034	0.195884	PGAP2, GNRH1, TRAF6, ANXA4, BCL2L10	87	360	13528	2.15964	1	0.994767	96.4216
GOTERM_BP_FAT	GO:0006915~apoptosis	6	5.17241	0.336464	TRIM35, MRPL41, MADD, CD5L, TRAF6, BCL2L10	87	602	13528	1.54978	1	0.999113	99.8099
GOTERM_BP_FAT	GO:0012501~programmed cell death	6	5.17241	0.347893	TRIM35, MRPL41, MADD, CD5L, TRAF6, BCL2L10	87	611	13528	1.52695	1	0.998959	99.8542
GOTERM_BP_FAT	GO:0042981~regulation of apoptosis	7	6.03448	0.404121	PGAP2, TRIM35, GNRH1, MADD, TRAF6, ANXA4, BCL2L10	87	804	13528	1.35381	1	0.999384	99.9632
GOTERM_BP_FAT	GO:0043067~regulation of programmed cell death	7	6.03448	0.413342	PGAP2, TRIM35, GNRH1, MADD, TRAF6, ANXA4, BCL2L10	87	812	13528	1.34047	1	0.999434	99.971
GOTERM_BP_FAT	GO:0010941~regulation of cell death	7	6.03448	0.416798	PGAP2, TRIM35, GNRH1, MADD, TRAF6, ANXA4, BCL2L10	87	815	13528	1.33553	1	0.999403	99.9735
GOTERM_BP_FAT	GO:0008219~cell death	6	5.17241	0.484532	TRIM35, MRPL41, MADD, CD5L, TRAF6, BCL2L10	87	719	13528	1.29759	1	0.9998	99.996
GOTERM_BP_FAT	GO:0016265~death	6	5.17241	0.490695	TRIM35, MRPL41, MADD, CD5L, TRAF6, BCL2L10	87	724	13528	1.28863	1	0.999773	99.9967
Annotation Cluster 11	Enrichment Score: 0.5622661325794167
Category	Term	Count	%	PValue	Genes	List Total	Pop Hits	Pop Total	Fold Enrichment	Bonferroni	Benjamini	FDR
UP_SEQ_FEATURE	metal ion-binding site:Zinc; catalytic	4	3.44828	0.0365282	ADAT2, ADAM30, ADAMTS2, CPN1	114	123	19113	5.45229	1	0.952707	40.6015
SP_PIR_KEYWORDS	metalloprotease	3	2.58621	0.222497	ADAM30, ADAMTS2, CPN1	114	151	19235	3.35221	1	0.913254	95.777
GOTERM_BP_FAT	GO:0006508~proteolysis	10	8.62069	0.225494	URM1, MBL2, USP54, TMPRSS11D, ATG7, CLPP, ADAM30, TRAF6, ADAMTS2, CPN1	87	1054	13528	1.47528	1	0.9958	97.9826
SP_PIR_KEYWORDS	Protease	5	4.31034	0.31714	TMPRSS11D, CLPP, ADAM30, ADAMTS2, CPN1	114	484	19235	1.74306	1	0.949865	99.1744
SP_PIR_KEYWORDS	zymogen	3	2.58621	0.341672	TMPRSS11D, ADAM30, ADAMTS2	114	206	19235	2.4572	1	0.952442	99.4788
GOTERM_MF_FAT	GO:0008237~metallopeptidase activity	3	2.58621	0.347688	ADAM30, ADAMTS2, CPN1	88	183	12983	2.41859	1	0.979282	99.6044
GOTERM_MF_FAT	GO:0004175~endopeptidase activity	4	3.44828	0.461835	TMPRSS11D, CLPP, ADAM30, ADAMTS2	88	375	12983	1.5737	1	0.99467	99.9672
GOTERM_MF_FAT	GO:0070011~peptidase activity, acting on L-amino acid peptides	5	4.31034	0.504964	TMPRSS11D, CLPP, ADAM30, ADAMTS2, CPN1	88	549	12983	1.34366	1	0.996139	99.9889
GOTERM_MF_FAT	GO:0008233~peptidase activity	5	4.31034	0.540405	TMPRSS11D, CLPP, ADAM30, ADAMTS2, CPN1	88	574	12983	1.28514	1	0.997399	99.9958
Annotation Cluster 12	Enrichment Score: 0.5532321222297817
Category	Term	Count	%	PValue	Genes	List Total	Pop Hits	Pop Total	Fold Enrichment	Bonferroni	Benjamini	FDR
SP_PIR_KEYWORDS	zinc	18	15.5172	0.140519	ASXL2, S100A3, RPS27P13, RNF185, C1ORF124, CPN1, VPS8, ZFC3H1, HAGH, ZNF323, RPS27, TRIM35, MYRIP, ZFP90, ADAT2, ADAM30, TRAF6, ADAMTS2, ZFYVE1	114	2189	19235	1.38744	1	0.87247	85.1048
GOTERM_MF_FAT	GO:0046872~metal ion binding	33	28.4483	0.191955	MBL2, S100A3, RPS27P13, CLSTN2, KCNK18, RNF185, DLK1, CPN1, ZFC3H1, SLC23A1, ZNF323, RPS27, SLC23A2, SLC24A2, ZFP90, ENTPD7, ADAT2, ADAM30, TRAF6, ZFYVE1, ASXL2, PLA2G10, PNCK, KCNK1, C1ORF124, ANXA4, VPS8, HAGH, MYRIP, TRIM35, KCNJ6, PLSCR3, TRIM77, ADAMTS2	88	4140	12983	1.176	1	0.987113	93.6712
GOTERM_MF_FAT	GO:0043169~cation binding	33	28.4483	0.209078	MBL2, S100A3, RPS27P13, CLSTN2, KCNK18, RNF185, DLK1, CPN1, ZFC3H1, SLC23A1, ZNF323, RPS27, SLC23A2, SLC24A2, ZFP90, ENTPD7, ADAT2, ADAM30, TRAF6, ZFYVE1, ASXL2, PLA2G10, PNCK, KCNK1, C1ORF124, ANXA4, VPS8, HAGH, MYRIP, TRIM35, KCNJ6, PLSCR3, TRIM77, ADAMTS2	88	4179	12983	1.16502	1	0.987971	95.2041
GOTERM_MF_FAT	GO:0043167~ion binding	33	28.4483	0.237944	MBL2, S100A3, RPS27P13, CLSTN2, KCNK18, RNF185, DLK1, CPN1, ZFC3H1, SLC23A1, ZNF323, RPS27, SLC23A2, SLC24A2, ZFP90, ENTPD7, ADAT2, ADAM30, TRAF6, ZFYVE1, ASXL2, PLA2G10, PNCK, KCNK1, C1ORF124, ANXA4, VPS8, HAGH, MYRIP, TRIM35, KCNJ6, PLSCR3, TRIM77, ADAMTS2	88	4241	12983	1.14799	1	0.980083	97.0367
GOTERM_MF_FAT	GO:0008270~zinc ion binding	19	16.3793	0.278828	ASXL2, S100A3, RPS27P13, RNF185, C1ORF124, CPN1, VPS8, ZFC3H1, HAGH, ZNF323, RPS27, TRIM35, MYRIP, ZFP90, ADAT2, ADAM30, TRAF6, TRIM77, ADAMTS2, ZFYVE1	88	2311	12983	1.21296	1	0.977931	98.549
SP_PIR_KEYWORDS	metal-binding	20	17.2414	0.382495	ASXL2, S100A3, RPS27P13, PLA2G10, RNF185, C1ORF124, CPN1, VPS8, ZFC3H1, HAGH, ZNF323, RPS27, TRIM35, MYRIP, ZFP90, ADAT2, PON1, ADAM30, TRAF6, ADAMTS2, ZFYVE1	114	2972	19235	1.13545	1	0.966328	99.767
SP_PIR_KEYWORDS	zinc-finger	12	10.3448	0.429028	ASXL2, RPS27P13, RNF185, C1ORF124, VPS8, ZFC3H1, ZNF323, RPS27, TRIM35, MYRIP, ZFP90, TRAF6, ZFYVE1	114	1718	19235	1.17854	1	0.968708	99.913
GOTERM_MF_FAT	GO:0046914~transition metal ion binding	19	16.3793	0.610912	ASXL2, S100A3, RPS27P13, RNF185, C1ORF124, CPN1, VPS8, ZFC3H1, HAGH, ZNF323, RPS27, TRIM35, MYRIP, ZFP90, ADAT2, ADAM30, TRAF6, TRIM77, ADAMTS2, ZFYVE1	88	2785	12983	1.00652	1	0.99865	99.9995
Annotation Cluster 13	Enrichment Score: 0.542175103077457
Category	Term	Count	%	PValue	Genes	List Total	Pop Hits	Pop Total	Fold Enrichment	Bonferroni	Benjamini	FDR
SP_PIR_KEYWORDS	transmembrane protein	7	6.03448	0.176626	FGFR1, SLC23A1, HRH1, KCNJ6, SLC23A2, TGFA, GRIA3	114	642	19235	1.83971	1	0.875897	91.317
GOTERM_CC_FAT	GO:0031226~intrinsic to plasma membrane	11	9.48276	0.226689	FGFR1, SLC23A1, HRH1, KCNJ6, TMPRSS11D, SLC23A2, NUMB, PRIMA1, ODZ1, KCNK1, AGER	81	1215	12782	1.42866	1	0.988291	95.6955
GOTERM_CC_FAT	GO:0005887~integral to plasma membrane	10	8.62069	0.324921	FGFR1, SLC23A1, HRH1, KCNJ6, TMPRSS11D, SLC23A2, NUMB, ODZ1, KCNK1, AGER	81	1188	12782	1.3283	1	0.994641	99.1834
GOTERM_CC_FAT	GO:0044459~plasma membrane part	15	12.931	0.52124	FGFR1, COL23A1, GRIA3, KCNK1, AGER, ARHGAP31, HRH1, SLC23A1, KCNJ6, TMPRSS11D, SLC23A2, NUMB, PRIMA1, ODZ1, TPR	81	2203	12782	1.07446	1	0.997684	99.9878
Annotation Cluster 14	Enrichment Score: 0.4976827999577176
Category	Term	Count	%	PValue	Genes	List Total	Pop Hits	Pop Total	Fold Enrichment	Bonferroni	Benjamini	FDR
INTERPRO	IPR017907:Zinc finger, RING-type, conserved site	4	3.44828	0.259219	TRIM35, RNF185, TRAF6, VPS8	106	280	16659	2.24515	1	1	98.1321
INTERPRO	IPR001841:Zinc finger, RING-type	4	3.44828	0.286552	TRIM35, RNF185, TRAF6, VPS8	106	296	16659	2.12379	1	1	98.8656
SMART	SM00184:RING	4	3.44828	0.293196	TRIM35, RNF185, TRAF6, VPS8	59	296	9079	2.07948	1	1	97.272
UP_SEQ_FEATURE	zinc finger region:RING-type	3	2.58621	0.353063	TRIM35, RNF185, TRAF6	114	210	19113	2.39511	1	0.999999	99.7749
INTERPRO	IPR018957:Zinc finger, C3HC4 RING-type	3	2.58621	0.422381	TRIM35, RNF185, TRAF6	106	228	16659	2.0679	1	1	99.9311
Annotation Cluster 15	Enrichment Score: 0.4086772995376431
Category	Term	Count	%	PValue	Genes	List Total	Pop Hits	Pop Total	Fold Enrichment	Bonferroni	Benjamini	FDR
GOTERM_BP_FAT	GO:0048232~male gamete generation	4	3.44828	0.311759	ODF2, PAFAH1B2, ADAMTS2, BCL2L10	87	308	13528	2.01941	1	0.998768	99.6678
GOTERM_BP_FAT	GO:0007283~spermatogenesis	4	3.44828	0.311759	ODF2, PAFAH1B2, ADAMTS2, BCL2L10	87	308	13528	2.01941	1	0.998768	99.6678
GOTERM_BP_FAT	GO:0032504~multicellular organism reproduction	5	4.31034	0.37467	GNRH1, ODF2, PAFAH1B2, ADAMTS2, BCL2L10	87	487	13528	1.59645	1	0.999052	99.9232
GOTERM_BP_FAT	GO:0048609~reproductive process in a multicellular organism	5	4.31034	0.37467	GNRH1, ODF2, PAFAH1B2, ADAMTS2, BCL2L10	87	487	13528	1.59645	1	0.999052	99.9232
GOTERM_BP_FAT	GO:0007276~gamete generation	4	3.44828	0.461363	ODF2, PAFAH1B2, ADAMTS2, BCL2L10	87	395	13528	1.57463	1	0.999692	99.9921
GOTERM_BP_FAT	GO:0019953~sexual reproduction	4	3.44828	0.560993	ODF2, PAFAH1B2, ADAMTS2, BCL2L10	87	458	13528	1.35803	1	0.999951	99.9997
Annotation Cluster 16	Enrichment Score: 0.3762270859980833
Category	Term	Count	%	PValue	Genes	List Total	Pop Hits	Pop Total	Fold Enrichment	Bonferroni	Benjamini	FDR
GOTERM_MF_FAT	GO:0030695~GTPase regulator activity	5	4.31034	0.286209	ARHGAP31, MYRIP, MADD, TBC1D5, RAPGEFL1	88	404	12983	1.82592	1	0.972444	98.73
GOTERM_MF_FAT	GO:0060589~nucleoside-triphosphatase regulator activity	5	4.31034	0.299787	ARHGAP31, MYRIP, MADD, TBC1D5, RAPGEFL1	88	413	12983	1.78613	1	0.969573	99.0097
GOTERM_MF_FAT	GO:0005083~small GTPase regulator activity	3	2.58621	0.551238	MYRIP, MADD, TBC1D5	88	274	12983	1.61534	1	0.996892	99.9969
GOTERM_MF_FAT	GO:0008047~enzyme activator activity	3	2.58621	0.661084	ARHGAP31, MADD, TBC1D5	88	335	12983	1.3212	1	0.999066	99.9999
Annotation Cluster 17	Enrichment Score: 0.28406109747079206
Category	Term	Count	%	PValue	Genes	List Total	Pop Hits	Pop Total	Fold Enrichment	Bonferroni	Benjamini	FDR
GOTERM_CC_FAT	GO:0070013~intracellular organelle lumen	13	11.2069	0.437799	BACH1, MRPL41, TBX2, TRRAP, C1ORF124, COBRA1, HAGH, MINA, SMARCC1, CLPP, TPR, TSEN2, TBX19	81	1779	12782	1.15314	1	0.99715	99.913
GOTERM_CC_FAT	GO:0043233~organelle lumen	13	11.2069	0.470879	BACH1, MRPL41, TBX2, TRRAP, C1ORF124, COBRA1, HAGH, MINA, SMARCC1, CLPP, TPR, TSEN2, TBX19	81	1820	12782	1.12716	1	0.99696	99.9586
GOTERM_CC_FAT	GO:0031974~membrane-enclosed lumen	13	11.2069	0.499754	BACH1, MRPL41, TBX2, TRRAP, C1ORF124, COBRA1, HAGH, MINA, SMARCC1, CLPP, TPR, TSEN2, TBX19	81	1856	12782	1.1053	1	0.9975	99.9791
GOTERM_CC_FAT	GO:0031981~nuclear lumen	10	8.62069	0.563173	BACH1, MINA, TBX2, SMARCC1, TRRAP, TSEN2, TPR, C1ORF124, TBX19, COBRA1	81	1450	12782	1.08829	1	0.997446	99.996
GOTERM_CC_FAT	GO:0005654~nucleoplasm	6	5.17241	0.654806	TBX2, SMARCC1, TRRAP, TPR, C1ORF124, COBRA1	81	882	12782	1.07349	1	0.999156	99.9998
Annotation Cluster 18	Enrichment Score: 0.237065401174291
Category	Term	Count	%	PValue	Genes	List Total	Pop Hits	Pop Total	Fold Enrichment	Bonferroni	Benjamini	FDR
GOTERM_BP_FAT	GO:0031175~neuron projection development	3	2.58621	0.48643	FGFR1, PLA2G10, NUMB	87	256	13528	1.8222	1	0.99978	99.9962
GOTERM_BP_FAT	GO:0030182~neuron differentiation	4	3.44828	0.530508	FGFR1, PLA2G10, EMX2, NUMB	87	438	13528	1.42004	1	0.999904	99.999
GOTERM_BP_FAT	GO:0048666~neuron development	3	2.58621	0.638916	FGFR1, PLA2G10, NUMB	87	339	13528	1.37606	1	0.999987	100
GOTERM_BP_FAT	GO:0030030~cell projection organization	3	2.58621	0.683254	FGFR1, PLA2G10, NUMB	87	368	13528	1.26762	1	0.999991	100
Annotation Cluster 19	Enrichment Score: 0.2357003414350521
Category	Term	Count	%	PValue	Genes	List Total	Pop Hits	Pop Total	Fold Enrichment	Bonferroni	Benjamini	FDR
GOTERM_CC_FAT	GO:0005635~nuclear envelope	3	2.58621	0.368273	GLE1, TPR, BCL2L10	81	205	12782	2.3093	1	0.996571	99.6375
GOTERM_CC_FAT	GO:0012505~endomembrane system	6	5.17241	0.546335	PGAP2, CLSTN2, GRIA3, GLE1, TPR, BCL2L10	81	782	12782	1.21076	1	0.998002	99.9937
GOTERM_CC_FAT	GO:0031967~organelle envelope	4	3.44828	0.752	GLE1, TPR, COX15, BCL2L10	81	620	12782	1.01808	1	0.999756	100
GOTERM_CC_FAT	GO:0031975~envelope	4	3.44828	0.753967	GLE1, TPR, COX15, BCL2L10	81	622	12782	1.01481	1	0.999692	100
Annotation Cluster 20	Enrichment Score: 0.1928877853293274
Category	Term	Count	%	PValue	Genes	List Total	Pop Hits	Pop Total	Fold Enrichment	Bonferroni	Benjamini	FDR
GOTERM_CC_FAT	GO:0005759~mitochondrial matrix	3	2.58621	0.417039	HAGH, MRPL41, CLPP	81	227	12782	2.0855	1	0.997076	99.8644
GOTERM_CC_FAT	GO:0031980~mitochondrial lumen	3	2.58621	0.417039	HAGH, MRPL41, CLPP	81	227	12782	2.0855	1	0.997076	99.8644
SP_PIR_KEYWORDS	mitochondrion	5	4.31034	0.725789	HAGH, MRPL41, CLPP, COX15, BCL2L10	114	832	19235	1.01399	1	0.997518	100
GOTERM_CC_FAT	GO:0044429~mitochondrial part	4	3.44828	0.726363	HAGH, MRPL41, CLPP, COX15	81	595	12782	1.06086	1	0.999667	100
UP_SEQ_FEATURE	transit peptide:Mitochondrion	3	2.58621	0.766893	HAGH, MRPL41, CLPP	114	467	19113	1.07703	1	1	100
SP_PIR_KEYWORDS	transit peptide	3	2.58621	0.773026	HAGH, MRPL41, CLPP	114	476	19235	1.06341	1	0.998607	100
GOTERM_CC_FAT	GO:0005739~mitochondrion	6	5.17241	0.821372	HAGH, MRPL41, CLPP, C1ORF31, COX15, BCL2L10	81	1087	12782	0.871035	1	0.999746	100
Annotation Cluster 21	Enrichment Score: 0.17504001917505077
Category	Term	Count	%	PValue	Genes	List Total	Pop Hits	Pop Total	Fold Enrichment	Bonferroni	Benjamini	FDR
SP_PIR_KEYWORDS	golgi apparatus	5	4.31034	0.455283	PGAP2, MBL2, CLSTN2, IL17RD, ZFYVE1	114	588	19235	1.43476	1	0.973877	99.9519
GOTERM_CC_FAT	GO:0044431~Golgi apparatus part	3	2.58621	0.5526	PGAP2, CLSTN2, ZFYVE1	81	294	12782	1.61023	1	0.997642	99.9947
GOTERM_CC_FAT	GO:0005794~Golgi apparatus	5	4.31034	0.804289	PGAP2, KCNJ6, CLSTN2, IL17RD, ZFYVE1	81	872	12782	0.904831	1	0.999751	100
GOTERM_CC_FAT	GO:0005783~endoplasmic reticulum	3	2.58621	0.985678	PGAP2, CLSTN2, ZFYVE1	81	960	12782	0.493133	1	1	100
Annotation Cluster 22	Enrichment Score: 0.17218106707423872
Category	Term	Count	%	PValue	Genes	List Total	Pop Hits	Pop Total	Fold Enrichment	Bonferroni	Benjamini	FDR
GOTERM_MF_FAT	GO:0046983~protein dimerization activity	5	4.31034	0.494836	BACH1, SBF2, SLC24A2, ATG7, PON1	88	542	12983	1.36102	1	0.996215	99.9856
GOTERM_MF_FAT	GO:0042803~protein homodimerization activity	3	2.58621	0.659467	SBF2, ATG7, PON1	88	334	12983	1.32516	1	0.999202	99.9999
GOTERM_MF_FAT	GO:0042802~identical protein binding	3	2.58621	0.93283	SBF2, ATG7, PON1	88	640	12983	0.691566	1	0.999995	100
Annotation Cluster 23	Enrichment Score: 0.17100759311683497
Category	Term	Count	%	PValue	Genes	List Total	Pop Hits	Pop Total	Fold Enrichment	Bonferroni	Benjamini	FDR
GOTERM_BP_FAT	GO:0006508~proteolysis	10	8.62069	0.225494	URM1, MBL2, USP54, TMPRSS11D, ATG7, CLPP, ADAM30, TRAF6, ADAMTS2, CPN1	87	1054	13528	1.47528	1	0.9958	97.9826
GOTERM_BP_FAT	GO:0019941~modification-dependent protein catabolic process	4	3.44828	0.712923	URM1, USP54, ATG7, TRAF6	87	574	13528	1.08358	1	0.999994	100
GOTERM_BP_FAT	GO:0043632~modification-dependent macromolecule catabolic process	4	3.44828	0.712923	URM1, USP54, ATG7, TRAF6	87	574	13528	1.08358	1	0.999994	100
GOTERM_BP_FAT	GO:0051603~proteolysis involved in cellular protein catabolic process	4	3.44828	0.74091	URM1, USP54, ATG7, TRAF6	87	600	13528	1.03663	1	0.999996	100
GOTERM_BP_FAT	GO:0044257~cellular protein catabolic process	4	3.44828	0.743999	URM1, USP54, ATG7, TRAF6	87	603	13528	1.03147	1	0.999996	100
GOTERM_BP_FAT	GO:0030163~protein catabolic process	4	3.44828	0.762896	URM1, USP54, ATG7, TRAF6	87	622	13528	0.999963	1	0.999998	100
SP_PIR_KEYWORDS	ubl conjugation pathway	3	2.58621	0.804254	URM1, ATG7, TRAF6	114	509	19235	0.994468	1	0.998875	100
GOTERM_BP_FAT	GO:0044265~cellular macromolecule catabolic process	4	3.44828	0.846695	URM1, USP54, ATG7, TRAF6	87	725	13528	0.857899	1	1	100
GOTERM_BP_FAT	GO:0009057~macromolecule catabolic process	4	3.44828	0.880619	URM1, USP54, ATG7, TRAF6	87	781	13528	0.796385	1	1	100
Annotation Cluster 24	Enrichment Score: 0.1331732229632753
Category	Term	Count	%	PValue	Genes	List Total	Pop Hits	Pop Total	Fold Enrichment	Bonferroni	Benjamini	FDR
GOTERM_BP_FAT	GO:0006954~inflammatory response	3	2.58621	0.615858	MBL2, HRH1, AGER	87	325	13528	1.43533	1	0.999983	100
GOTERM_BP_FAT	GO:0006952~defense response	4	3.44828	0.756066	MBL2, HRH1, CD5L, AGER	87	615	13528	1.01134	1	0.999997	100
GOTERM_BP_FAT	GO:0009611~response to wounding	3	2.58621	0.855933	MBL2, HRH1, AGER	87	530	13528	0.880156	1	1	100
Annotation Cluster 25	Enrichment Score: 0.1324879636229233
Category	Term	Count	%	PValue	Genes	List Total	Pop Hits	Pop Total	Fold Enrichment	Bonferroni	Benjamini	FDR
SP_PIR_KEYWORDS	protein transport	4	3.44828	0.545327	ATG7, RAB24, GLE1, TPR	114	485	19235	1.39157	1	0.988511	99.995
GOTERM_BP_FAT	GO:0015031~protein transport	5	4.31034	0.721251	MYRIP, ATG7, RAB24, GLE1, TPR	87	762	13528	1.0203	1	0.999995	100
GOTERM_BP_FAT	GO:0045184~establishment of protein localization	5	4.31034	0.727966	MYRIP, ATG7, RAB24, GLE1, TPR	87	769	13528	1.01102	1	0.999995	100
GOTERM_BP_FAT	GO:0008104~protein localization	5	4.31034	0.820417	MYRIP, ATG7, RAB24, GLE1, TPR	87	882	13528	0.881487	1	0.999999	100
GOTERM_BP_FAT	GO:0046907~intracellular transport	3	2.58621	0.926129	MYRIP, GLE1, TPR	87	657	13528	0.710019	1	1	100
Annotation Cluster 26	Enrichment Score: 0.1284824863964103
Category	Term	Count	%	PValue	Genes	List Total	Pop Hits	Pop Total	Fold Enrichment	Bonferroni	Benjamini	FDR
GOTERM_BP_FAT	GO:0016310~phosphorylation	7	6.03448	0.399508	S1PR2, FGFR1, MADD, PNCK, TGFA, PKN1, COX15	87	800	13528	1.36057	1	0.9994	99.9586
SP_PIR_KEYWORDS	ATP	3	2.58621	0.404684	FGFR1, CLPP, PKN1	114	236	19235	2.14485	1	0.970604	99.8529
GOTERM_BP_FAT	GO:0006468~protein amino acid phosphorylation	6	5.17241	0.419264	S1PR2, FGFR1, MADD, PNCK, TGFA, PKN1	87	667	13528	1.39875	1	0.999358	99.9752
SP_PIR_KEYWORDS	kinase	5	4.31034	0.57891	FGFR1, MADD, PNCK, PKN1, CMPK1	114	688	19235	1.22622	1	0.990373	99.9981
UP_SEQ_FEATURE	nucleotide phosphate-binding region:ATP	6	5.17241	0.678127	FGFR1, KIF25, PNCK, PKN1, SNRNP35, CMPK1	114	962	19113	1.04568	1	1	100
UP_SEQ_FEATURE	active site:Proton acceptor	4	3.44828	0.751336	FGFR1, PNCK, PON1, PKN1	114	658	19113	1.0192	1	1	100
UP_SEQ_FEATURE	domain:Protein kinase	3	2.58621	0.768961	FGFR1, PNCK, PKN1	114	469	19113	1.07244	1	1	100
GOTERM_MF_FAT	GO:0004672~protein kinase activity	4	3.44828	0.778617	FGFR1, PNCK, TGFA, PKN1	88	606	12983	0.973822	1	0.999923	100
INTERPRO	IPR017441:Protein kinase, ATP binding site	3	2.58621	0.785371	FGFR1, PNCK, PKN1	106	455	16659	1.03622	1	1	100
GOTERM_MF_FAT	GO:0005524~ATP binding	9	7.75862	0.787476	FGFR1, KIF25, SWAP70, PNCK, CLPP, PKN1, SNRNP35, TPR, CMPK1	88	1477	12983	0.898989	1	0.999904	100
SP_PIR_KEYWORDS	atp-binding	7	6.03448	0.799358	FGFR1, KIF25, PNCK, CLPP, PKN1, SNRNP35, CMPK1	114	1326	19235	0.890721	1	0.998915	100
GOTERM_MF_FAT	GO:0032559~adenyl ribonucleotide binding	9	7.75862	0.799967	FGFR1, KIF25, SWAP70, PNCK, CLPP, PKN1, SNRNP35, TPR, CMPK1	88	1497	12983	0.886979	1	0.999896	100
INTERPRO	IPR000719:Protein kinase, core	3	2.58621	0.806122	FGFR1, PNCK, PKN1	106	476	16659	0.990507	1	1	100
UP_SEQ_FEATURE	binding site:ATP	3	2.58621	0.834312	FGFR1, PNCK, PKN1	114	542	19113	0.927996	1	1	100
GOTERM_MF_FAT	GO:0030554~adenyl nucleotide binding	9	7.75862	0.844596	FGFR1, KIF25, SWAP70, PNCK, CLPP, PKN1, SNRNP35, TPR, CMPK1	88	1577	12983	0.841983	1	0.999969	100
GOTERM_MF_FAT	GO:0001883~purine nucleoside binding	9	7.75862	0.856376	FGFR1, KIF25, SWAP70, PNCK, CLPP, PKN1, SNRNP35, TPR, CMPK1	88	1601	12983	0.829361	1	0.999974	100
GOTERM_MF_FAT	GO:0001882~nucleoside binding	9	7.75862	0.861538	FGFR1, KIF25, SWAP70, PNCK, CLPP, PKN1, SNRNP35, TPR, CMPK1	88	1612	12983	0.823701	1	0.999973	100
SP_PIR_KEYWORDS	nucleotide-binding	8	6.89655	0.875981	FGFR1, KIF25, PNCK, CLPP, PKN1, RAB24, SNRNP35, CMPK1	114	1686	19235	0.800608	1	0.999566	100
GOTERM_MF_FAT	GO:0032553~ribonucleotide binding	10	8.62069	0.883476	FGFR1, KIF25, SWAP70, PNCK, CLPP, PKN1, RAB24, SNRNP35, TPR, CMPK1	88	1836	12983	0.803563	1	0.999979	100
GOTERM_MF_FAT	GO:0032555~purine ribonucleotide binding	10	8.62069	0.883476	FGFR1, KIF25, SWAP70, PNCK, CLPP, PKN1, RAB24, SNRNP35, TPR, CMPK1	88	1836	12983	0.803563	1	0.999979	100
GOTERM_MF_FAT	GO:0017076~purine nucleotide binding	10	8.62069	0.911989	FGFR1, KIF25, SWAP70, PNCK, CLPP, PKN1, RAB24, SNRNP35, TPR, CMPK1	88	1918	12983	0.769208	1	0.999991	100
SP_PIR_KEYWORDS	transferase	6	5.17241	0.919303	TARBP1, FGFR1, UPRT, PNCK, PKN1, CMPK1	114	1394	19235	0.726233	1	0.999857	100
GOTERM_MF_FAT	GO:0000166~nucleotide binding	10	8.62069	0.97502	FGFR1, KIF25, SWAP70, PNCK, CLPP, PKN1, RAB24, SNRNP35, TPR, CMPK1	88	2245	12983	0.657167	1	1	100
Annotation Cluster 27	Enrichment Score: 0.11058626712716972
Category	Term	Count	%	PValue	Genes	List Total	Pop Hits	Pop Total	Fold Enrichment	Bonferroni	Benjamini	FDR
GOTERM_BP_FAT	GO:0031328~positive regulation of cellular biosynthetic process	5	4.31034	0.639581	HRH1, SMARCC1, EHF, TRAF6, TBX19	87	685	13528	1.13499	1	0.999985	100
GOTERM_BP_FAT	GO:0010604~positive regulation of macromolecule metabolic process	6	5.17241	0.642568	PLA2G10, SMARCC1, ATG7, EHF, TRAF6, TBX19	87	857	13528	1.08864	1	0.999984	100
GOTERM_BP_FAT	GO:0009891~positive regulation of biosynthetic process	5	4.31034	0.650987	HRH1, SMARCC1, EHF, TRAF6, TBX19	87	695	13528	1.11866	1	0.999985	100
GOTERM_BP_FAT	GO:0051173~positive regulation of nitrogen compound metabolic process	4	3.44828	0.783373	HRH1, SMARCC1, EHF, TBX19	87	644	13528	0.965803	1	0.999999	100
GOTERM_BP_FAT	GO:0010557~positive regulation of macromolecule biosynthetic process	4	3.44828	0.792197	SMARCC1, EHF, TRAF6, TBX19	87	654	13528	0.951035	1	0.999999	100
GOTERM_BP_FAT	GO:0045893~positive regulation of transcription, DNA-dependent	3	2.58621	0.811869	SMARCC1, EHF, TBX19	87	477	13528	0.977951	1	0.999999	100
GOTERM_BP_FAT	GO:0051254~positive regulation of RNA metabolic process	3	2.58621	0.815569	SMARCC1, EHF, TBX19	87	481	13528	0.969819	1	0.999999	100
GOTERM_BP_FAT	GO:0045941~positive regulation of transcription	3	2.58621	0.879078	SMARCC1, EHF, TBX19	87	564	13528	0.827097	1	1	100
GOTERM_BP_FAT	GO:0010628~positive regulation of gene expression	3	2.58621	0.889334	SMARCC1, EHF, TBX19	87	581	13528	0.802896	1	1	100
GOTERM_BP_FAT	GO:0045935~positive regulation of nucleobase, nucleoside, nucleotide and nucleic acid metabolic process	3	2.58621	0.911821	SMARCC1, EHF, TBX19	87	624	13528	0.747569	1	1	100
Annotation Cluster 28	Enrichment Score: 0.10058222667171123
Category	Term	Count	%	PValue	Genes	List Total	Pop Hits	Pop Total	Fold Enrichment	Bonferroni	Benjamini	FDR
SP_PIR_KEYWORDS	repressor	5	4.31034	0.252934	BACH1, ASXL2, ZFP90, TBX19, COBRA1	114	435	19235	1.9394	1	0.933059	97.4441
GOTERM_MF_FAT	GO:0043565~sequence-specific DNA binding	4	3.44828	0.779578	BACH1, TBX2, EMX2, EHF	88	607	12983	0.972218	1	0.999905	100
GOTERM_MF_FAT	GO:0003700~transcription factor activity	6	5.17241	0.791835	BACH1, ZNF323, TBX2, EMX2, EHF, TBX19	88	975	12983	0.907902	1	0.999894	100
GOTERM_BP_FAT	GO:0006357~regulation of transcription from RNA polymerase II promoter	4	3.44828	0.848036	TARBP1, TBX2, SMARCC1, TBX19	87	727	13528	0.855539	1	1	100
SP_PIR_KEYWORDS	transcription regulation	10	8.62069	0.853691	BACH1, ASXL2, ZNF323, TBX2, SMARCC1, ZFP90, EHF, TRRAP, TBX19, COBRA1	114	2026	19235	0.832814	1	0.999469	100
SP_PIR_KEYWORDS	dna-binding	9	7.75862	0.868856	BACH1, ZNF323, TBX2, SWAP70, ZFP90, EMX2, EHF, OBFC2A, TBX19	114	1868	19235	0.81293	1	0.999598	100
SP_PIR_KEYWORDS	Transcription	10	8.62069	0.870732	BACH1, ASXL2, ZNF323, TBX2, SMARCC1, ZFP90, EHF, TRRAP, TBX19, COBRA1	114	2071	19235	0.814718	1	0.99956	100
GOTERM_BP_FAT	GO:0006355~regulation of transcription, DNA-dependent	9	7.75862	0.891209	TARBP1, BACH1, ZNF323, TBX2, SMARCC1, ZFP90, EMX2, EHF, TBX19	87	1773	13528	0.789311	1	1	100
GOTERM_MF_FAT	GO:0030528~transcription regulator activity	8	6.89655	0.893598	BACH1, ZNF323, TBX2, SMARCC1, EMX2, EHF, TRRAP, TBX19	88	1512	12983	0.780604	1	0.999983	100
GOTERM_BP_FAT	GO:0051252~regulation of RNA metabolic process	9	7.75862	0.904935	TARBP1, BACH1, ZNF323, TBX2, SMARCC1, ZFP90, EMX2, EHF, TBX19	87	1813	13528	0.771896	1	1	100
GOTERM_BP_FAT	GO:0045449~regulation of transcription	13	11.2069	0.921253	ASXL2, BACH1, TBX2, EMX2, EHF, TRRAP, SFMBT1, COBRA1, TARBP1, ZNF323, ZFP90, SMARCC1, TBX19	87	2601	13528	0.777172	1	1	100
GOTERM_MF_FAT	GO:0003677~DNA binding	12	10.3448	0.929797	BACH1, RPS27P13, SWAP70, TBX2, EMX2, EHF, OBFC2A, C1ORF124, ZNF323, RPS27, ZFP90, SMARCC1, TBX19	88	2331	12983	0.759506	1	0.999996	100
GOTERM_BP_FAT	GO:0006350~transcription	10	8.62069	0.932988	BACH1, ASXL2, ZNF323, TBX2, SMARCC1, ZFP90, EHF, TRRAP, TBX19, COBRA1	87	2101	13528	0.740096	1	1	100
Annotation Cluster 29	Enrichment Score: 0.08263819697761263
Category	Term	Count	%	PValue	Genes	List Total	Pop Hits	Pop Total	Fold Enrichment	Bonferroni	Benjamini	FDR
GOTERM_CC_FAT	GO:0031410~cytoplasmic vesicle	4	3.44828	0.772968	MYRIP, ENTPD7, PKN1, GRIA3	81	642	12782	0.983193	1	0.999745	100
GOTERM_CC_FAT	GO:0031982~vesicle	4	3.44828	0.797574	MYRIP, ENTPD7, PKN1, GRIA3	81	670	12782	0.942104	1	0.999769	100
GOTERM_CC_FAT	GO:0016023~cytoplasmic membrane-bounded vesicle	3	2.58621	0.864564	MYRIP, PKN1, GRIA3	81	550	12782	0.860741	1	0.999783	100
GOTERM_CC_FAT	GO:0031988~membrane-bounded vesicle	3	2.58621	0.876431	MYRIP, PKN1, GRIA3	81	568	12782	0.833464	1	0.999778	100
Annotation Cluster 30	Enrichment Score: 0.02452926861060848
Category	Term	Count	%	PValue	Genes	List Total	Pop Hits	Pop Total	Fold Enrichment	Bonferroni	Benjamini	FDR
SP_PIR_KEYWORDS	receptor	7	6.03448	0.9115	S1PR2, FGFR1, HRH1, GRIA3, GPR152, AGER, IL17RD	114	1583	19235	0.746113	1	0.999854	100
PIR_SUPERFAMILY	PIRSF800006:rhodopsin-like G protein-coupled receptors	3	2.58621	0.91185	S1PR2, HRH1, GPR152	43	686	7396	0.752187	1	1	100
INTERPRO	IPR017452:GPCR, rhodopsin-like superfamily	3	2.58621	0.946764	S1PR2, HRH1, GPR152	106	726	16659	0.649423	1	1	100
INTERPRO	IPR000276:7TM GPCR, rhodopsin-like	3	2.58621	0.947052	S1PR2, HRH1, GPR152	106	727	16659	0.64853	1	1	100
SP_PIR_KEYWORDS	g-protein coupled receptor	3	2.58621	0.955629	S1PR2, HRH1, GPR152	114	816	19235	0.620324	1	0.999975	100
SP_PIR_KEYWORDS	transducer	3	2.58621	0.967037	S1PR2, HRH1, GPR152	114	874	19235	0.579158	1	0.999989	100
GOTERM_BP_FAT	GO:0007186~G-protein coupled receptor protein signaling pathway	4	3.44828	0.977838	S1PR2, HRH1, GPR152, RAPGEFL1	87	1123	13528	0.553853	1	1	100

## Sheet: Hubs vessel network
Name	exSYMBOL	Primary_id	UniGene	ENSEMBL	entrez	symbol	Descr	Ascending.aorta_1.cexp	Ascending.aorta_2.cexp	Corner.pulmunary.valve_F_1.cexp	Corner.pulmunary.valve_F_2.cexp	Corner.pulmunary.valve_I_1.cexp	Corner.pulmunary.valve_I_2.cexp	Coronary.artery_1.cexp	Coronary.artery_2.cexp	Descending.aorta_1.cexp	Descending.aorta_2.cexp	Inferior.vena.cava_1.cexp	Inferior.vena.cava_2.cexp	Pulmunary.artery_1.cexp	Pulmunary.artery_2.cexp	Superior.vena.cava_1.cexp	Superior.vena.cava_2.cexp	atrio_sin2.bassa.exp	atrio_sin3.bassa.exp	ventr_sin1.bassa.exp	ventr_sin2.interm.exp
pig02420;pig02421	TMEM93;Tmem93	Ssc#S18550902|ENSSSCT00000019443	Ssc.1559	ENSSSCG00000017867			Transcribed locus, strongly similar to NP_001099276.1 transmembrane protein 93 [Rattus norvegicus]	9100.08	10619.5	3824.75	3587.25	5647.49	4901.14	3927.01	3874.85	7352.75	7174.8	2509.04	2571.07	7990.85	4175.12	4800.71	4745.65	2233.91	1780.67	1780.64	2982.94
pig18847	SEC61G	Ssc#S19546022|ENSSSCT00000017033	Ssc.27490	ENSSSCG00000015637		SEC61G	Protein transport protein Sec61 subunit gamma [Source:UniProtKB/Swiss-Prot;Acc:P60059]|Transcribed locus	10245.4	11469.8	7538.75	8593.33	18829.2	16177.9	6276.69	7341.59	11135.6	12281.8	4878.31	4596.21	9147.27	9013.52	15661.7	22000.2	1981.59	1931.06	2079.24	3150.07
pig21507;pig21508	LOC100154884	Ssc#S46880131|ENSSSCT00000007000	Ssc.20325	ENSSSCG00000006387	100154884	LOC100154884	Similar to Peroxisomal biogenesis factor 19	5805.35	5829.6	2796.03	2962.3	3839.2	3451.86	2864.07	2603.82	3439.41	3852.78	2590.71	2598.9	3674.24	2985.39	3535.15	3828.79	1903.35	1827.9	1944.44	2885.21
pig24947	PABPN1;Pabpn1	Ssc#S35166154|ENSSSCT00000002263	Ssc.72354	ENSSSCG00000002023		PABPN1	Transcribed locus, strongly similar to NP_062275.1 poly(A) binding protein, nuclear 1 [Mus musculus]|Polyadenylate-binding protein 2 (Poly(A)-binding protein 2)(Poly(A)-binding protein II)(PABII)(Polyadenylate-binding nuclear protein 1)(Nuclear poly(A)-binding protein 1) [Source:UniProtKB/Swiss-Prot;Acc:Q86U42]	10031.3	7842.56	2896.44	2330.62	4857.82	5310.7	3817.22	3153.11	10619.5	7572.54	3116.55	3033.08	8237	5403.56	5164.74	3979.84	1646.3	1831.74	NA	2146.5
pig29567;pig29568	NR3C1	ENSSSCT00000015740|Ssc#S35169007	Ssc.58472	ENSSSCG00000014402			Transcribed locus, strongly similar to NP_001008481.1 glucocorticoid receptor [Sus scrofa]	3674.47	3372.36	1722.59	1833.75	2041.61	2055.4	1876.91	1772.74	2303.86	2681.2	1712.6	1661.97	2258.56	2026.16	2320.5	2930.47	1607.42	1612.91	1811.06	2060.56
pig32747	THOC5;Thoc5	ENSSSCT00000010944|Ssc#S35173447	Ssc.54457	ENSSSCG00000009987			Transcribed locus, strongly similar to NP_001012153.1 THO complex 5 [Rattus norvegicus]	2530.79	2251.31	2023.72	1773.17	2210.16	2578.65	2108.41	1816.98	2656.88	2020.26	1723.43	1796.64	2584.53	1853.17	2122.97	1847.36	1617.1	1680.67	1606.51	2049.2
pig44678;pig44679	COL6A3	ENSSSCT00000017779|Ssc#S46876336	Ssc.12068	ENSSSCG00000016326	100101551	COL6A3|Q1T7A4_PIG	Type VI collagen alpha-3 chain Fragment [Source:UniProtKB/TrEMBL;Acc:Q1T7A4]|Collagen, type VI, alpha 3	3540.71	2988.64	2453.88	2122.81	2502.62	3065.4	2495.39	2175.01	3141.02	2395.68	2149.46	2100.9	3095.47	1945.89	2462.44	2168.51	2043.81	2083.62	1995.65	2353.58
pig01647;pig01648	STARD3	ENSSSCT00000019052	Ssc.4484	ENSSSCG00000017499	100233202	STARD3	StAR-related lipid transfer (START) domain containing 3	3499.71	3459.72	2449.83	2163.18	3829.54	3765.96	2590.03	2261.2	3351.81	3259	1561.99	1776.06	3595.3	2045.54	2850.68	2317.86	1828.45	1664.11	2309.25	3547.56
pig02191;pig02192	SPAG5	ENSSSCT00000019329	Ssc.34175	ENSSSCG00000017758	100286810	SPAG5	Sperm associated antigen 5	3229.31	3170.24	2503.41	2000.84	3248.43	3035.53	2479.76	2176.01	3234.09	2624.11	NA	1795	3028.18	1882.64	2601.62	1757	1619.04	1725.19	2101.3	3272.29
pig03251;pig03252	NOP56;Nop56	ENSSSCT00000007848	Ssc.53732	ENSSSCG00000007174			Transcribed locus, strongly similar to NP_001020903.1 nucleolar protein 5A [Rattus norvegicus]	17770.3	15516.7	5764.61	4304.75	8846.91	9436.85	6216.15	4800.71	15543.8	13140	4379.48	4893.43	14534.7	6723.79	10689.7	9670.98	2058.5	1698.53	NA	3374.47
pig03272;pig03273	SIRPB2	ENSSSCT00000007860		ENSSSCG00000007185		SIRPB2	Signal-regulatory protein beta-2 Precursor (Protein tyrosine phosphatase non-receptor type substrate protein)(Protein tyrosine phosphatase non-receptor type substrate 1-like 3) [Source:UniProtKB/Swiss-Prot;Acc:Q5JXA9]	3291.97	3186.16	2353.24	1918.82	2342.01	2894.74	2342.54	1838.14	3312.89	2434.21	NA	1749.08	2978.24	1558.01	2456.56	1730.9	1532.44	1615.11	NA	2298.99
pig03532;pig03533	LOC100154394;ROMO1	ENSSSCT00000007996	Ssc.72718|Ssc.5089	ENSSSCG00000007308	100154394|100037977	LOC100154394|ROMO1	Reactive oxygen species modulator 1|Hypothetical protein LOC100154394	11442.7	11328	4655.15	3818.21	6895.65	7572.54	3898.65	3673.09	7625.51	6713.21	2539.66	2464.49	8439.27	4580.2	6369.46	5102.34	1661.38	1561.39	2560.82	4917.74
pig05164;pig05165	FST	ENSSSCT00000018397	Ssc.4747	ENSSSCG00000016892	445002	FST	Follistatin	3972.38	3388.29	2480.31	2051.76	2911.79	2728.99	2455.71	2062.26	2984.59	2334.11	NA	1705.56	3135.36	2029.46	2656.61	2033.44	1619.94	1554.19	1947.39	2310.85
pig05363;pig05364	DUSP1;Dusp1	ENSSSCT00000018501	Ssc.6058|Ssc.61391	ENSSSCG00000016991			Transcribed locus, strongly similar to NP_038670.1 dual specificity phosphatase 1 [Mus musculus]|Transcribed locus, moderately similar to NP_038670.1 dual specificity phosphatase 1 [Mus musculus]	38838.2	44439.7	18328	25117	58283.8	57269.8	18675.5	16798.8	33196.1	37242.4	20316.1	21530	39876.2	29094.6	39155.7	44997.9	9220.17	3875.92	1939.74	4057.71
pig05417;pig05418	ARGRS	ENSSSCT00000018527	Ssc.1250|Ssc.58704	ENSSSCG00000017015	414410	ARGRS	Transcribed locus, strongly similar to NP_080212.1 arginyl-tRNA synthetase [Mus musculus]|Arginyl-tRNA synthetase	14087.4	13243.9	5780.21	4830.48	12176.1	10344.4	5961.52	4901.66	10785.5	8505.06	4298.71	4511.61	10232.8	5801.79	9389.79	8873.11	1892.3	1663.67	1708.72	2782.11
pig05431;pig05432	CCNG1;LOC595110	ENSSSCT00000018536	Ssc.5070	ENSSSCG00000017024	595110	LOC595110	Cyclin G1	44997.9	41504.9	16058.1	14221.4	29815.5	25370.8	19084.2	18552.8	31057.1	25414.5	7800.57	7453.54	28110.8	16888.3	26591.7	25024.2	4098.74	3093.01	2154.14	7398.95
pig05700;pig05701	GTF3A	ENSSSCT00000010193	Ssc.56164	ENSSSCG00000009305			Transcribed locus, moderately similar to NP_002088.2 transcription factor IIIA [Homo sapiens]	3101.1	3362.19	2533.32	1998.4	3109.71	3365.22	2538.41	2190.31	3440.09	2699.36	1693.74	1834.51	3384.26	2141.9	2674.6	1862.27	1697.81	1794.09	2240.37	3132.7
pig06746;pig06747	KIAA1602;LOC100155250	ENSSSCT00000000222	Ssc.60218	ENSSSCG00000000209	100155250	LOC100155250	Hypothetical protein LOC100155250	3470.93	3835.85	2942.46	2447.28	2954.1	3606.79	2561.2	2173.16	3553.56	3245.95	1862.42	2034.71	3623.09	1703.78	3242.16	2685.74	1710.11	1609.11	NA	2876.11
pig07909;pig07910	DCP1B	ENSSSCT00000000826		ENSSSCG00000000762		DCP1B	mRNA-decapping enzyme 1B (EC 3.-.-.-) [Source:UniProtKB/Swiss-Prot;Acc:Q8IZD4]	4126.21	3768.54	2984.26	2464.62	3816.75	3800.79	2792.81	2472.38	3677.26	3344.31	1920.09	2150.61	3804.41	2537.35	3063.32	2348.26	1941.96	1878.4	2609.31	3796.37
pig08390;pig08391	ALG12	ENSSSCT00000001070	Ssc.24377	ENSSSCG00000000980			Transcribed locus, moderately similar to NP_001096816.1 alpha-1,6-mannosyltransferase ALG12 [Bos taurus]	2944.01	2871.76	2323.47	2138.18	3389.49	2995.68	2285.94	2004.38	2944.56	2992.9	NA	1588.65	3331.99	1887.19	2439.08	2296.67	1573.59	1567.91	1832.53	2426.04
pig08400;pig08401	IGF2AS	ENSSSCT00000009490		ENSSSCG00000008673		IGF2AS	Putative insulin-like growth factor 2 antisense gene protein (IGF2-AS)(PEG8/IGF2AS protein) [Source:UniProtKB/Swiss-Prot;Acc:Q6U949]	5271.54	5180.05	3408.97	2936.6	4113.62	4234.12	3234.56	2972.99	4310.95	4180.39	2224.07	2319.11	4488.64	2500.51	3634.47	3360.45	2025.08	2031.75	2187.48	4302.99
pig08405;pig08406	LETM1	ENSSSCT00000009492	Ssc.18737	ENSSSCG00000008675			Transcribed locus, moderately similar to NP_036450.1 leucine zipper-EF-hand containing transmembrane protein 1 precursor [Homo sapiens]	3268.82	3189.07	2467.29	2189.22	3616.61	3275.03	2405.05	2170.91	3130.69	2771.26	1637.16	1779.49	3178.64	2014.78	2502.86	2229.32	1781.38	1570.5	2317.84	2375.53
pig08407;pig08408	SLBP;Slbp	ENSSSCT00000009493	Ssc.2620	ENSSSCG00000008676			Transcribed locus, strongly similar to NP_033219.1 stem-loop binding protein [Mus musculus]	3508.01	3344.88	2625.07	2351.95	4287.18	4054.26	2533.99	2224.93	4246.65	3756.78	1736.79	1845.11	4125.93	2502.03	3455.46	3175.25	1747.39	1567.28	2191.74	2587.21
pig08683;pig08684	ATP8A1	ENSSSCT00000009633		ENSSSCG00000008803		ATP8A1	Probable phospholipid-transporting ATPase IA (EC 3.6.3.1)(Chromaffin granule ATPase II)(ATPase class I type 8A member 1) [Source:UniProtKB/Swiss-Prot;Acc:Q9Y2Q0]	3537.66	3642.46	2428.18	2003.1	2731.56	2905.7	2375.86	2097.31	3399.29	2968.97	NA	1655.15	3159.71	1897.92	2704.98	2181.84	1592.39	1596.13	1956.74	2476.66
pig09751;pig09752	SPIRE2	ENSSSCT00000002924		ENSSSCG00000002635		SPIRE2	Protein spire homolog 2 (Spir-2) [Source:UniProtKB/Swiss-Prot;Acc:Q8WWL2]	4138.27	4323.61	2623.28	2439.62	3467.85	3991	2902.96	2430.75	3520.61	3128.75	2100.11	2295.8	3865.34	1972.62	3247.31	2488.21	1779.51	1801.39	1861.45	2808.46
pig09759;pig09760	AFG3L2	ENSSSCT00000002928		ENSSSCG00000002638		AFG3L2	AFG3-like protein 2 (EC 3.4.24.-)(Paraplegin-like protein) [Source:UniProtKB/Swiss-Prot;Acc:Q9Y4W6]	3442.01	3231.8	2359	1945.75	3090.4	3416.1	2352.25	2011.41	3460.44	2888.45	1667.62	1842.92	3227.15	1794.29	2924.59	2088.06	1640.59	1782.89	2453.66	3131.3
pig09995;pig09996	ATBF1	ENSSSCT00000003049		ENSSSCG00000002752		ATBF1	Zinc finger homeobox protein 3 (Zinc finger homeodomain protein 3)(ZFH-3)(Alpha-fetoprotein enhancer-binding protein)(AT motif-binding factor)(AT-binding transcription factor 1) [Source:UniProtKB/Swiss-Prot;Acc:Q15911]	3198.56	3189.07	2444.36	2343.15	4257.74	3618.56	2518.53	2474.15	3091.24	3516.03	1953.45	2036.79	3665.06	2319.25	3710.09	3445.68	1743.52	NA	2169.97	2723.11
pig10303;pig10304	PSENEN	ENSSSCT00000003201		ENSSSCG00000002897		PSENEN	Gamma-secretase subunit PEN-2 (Presenilin enhancer protein 2) [Source:UniProtKB/Swiss-Prot;Acc:Q9NZ42]	8175.01	7655.14	3932.2	3563.61	5337.64	6098.14	3278.56	2922.69	6239.16	5383.7	2133.7	2083.15	6067.7	3306.03	5326.48	4608.76	2054.44	1912.21	NA	2563.78
pig10305;pig10306	LIN37;RPS4X	ENSSSCT00000003202	Ssc.2772	ENSSSCG00000002898			Transcribed locus, strongly similar to NP_990439.1 ribosomal protein S4, X-linked [Gallus gallus]	3300.19	3211.81	2316.66	1900.92	2822.56	3019.11	2241.75	1887.96	3097.06	2518.53	NA	1714.71	2879.9	1572.9	2515.84	2054.49	1620.29	NA	NA	2497.46
pig12464;pig12465	ORC1L	ENSSSCT00000004273	Ssc.49569	ENSSSCG00000003861			Transcribed locus, moderately similar to NP_004144.2 origin recognition complex, subunit 1 [Homo sapiens]	3291.16	3078.46	2529.03	2499.81	3112.95	3180.03	2369.22	2099.04	2824.47	2735.32	1799.48	1913.44	2977.74	2119.46	2529.32	2354.86	1809.99	1561.1	1949.39	2694.89
pig12741;pig12742	C19ORF18;C19orf18	ENSSSCT00000004416		ENSSSCG00000003994		C19orf18	Uncharacterized protein C19orf18 Precursor [Source:UniProtKB/Swiss-Prot;Acc:Q8NEA5]	3693.19	3500.78	2251.91	2036.41	3752.75	3647.14	2418.54	1955.97	3152.74	2871.1	1810.01	1907.91	3368.8	2187.9	2949.95	2520.58	1893.35	1853.39	2249.07	3094.91
pig12758;pig12759	RPS5;rps5	ENSSSCT00000004425	Ssc.51853	ENSSSCG00000004002			Transcribed locus, strongly similar to NP_775339.1 ribosomal protein S5 [Danio rerio]	31398.6	29983	17124.4	12855.9	31965.6	32454.8	17349	16962.2	40430.8	32328.5	15593	14851.4	32454.8	22268.4	38379.4	35419.8	4003.44	3263.72	6902.82	9616.88
pig13025;pig13026	POP7;Pop7	ENSSSCT00000008412	Ssc.19669	ENSSSCG00000007672			Transcribed locus, strongly similar to NP_001099388.1 processing of precursor 7 [Rattus norvegicus]	3819.62	3584.31	2469.85	2030.58	3651.91	3779.61	2424.31	2156.32	3815.86	3014.65	1832.75	1930.29	3716.31	2237.79	3009.76	2222.9	1651.84	1670.65	2265.16	3401.89
pig13225;pig13226	VKORC1;Vkorc1	ENSSSCT00000008511	Ssc.12449	ENSSSCG00000007764			Transcribed locus, strongly similar to NP_848715.1 vitamin K epoxide reductase complex, subunit 1 [Mus musculus]	8544.15	9114.65	2978.14	3335.44	6768.36	6255.85	3424.43	3475.45	6430.38	7475.35	3124.29	3227.04	6897.51	4760.56	8055.52	10128.2	1682.81	1611.76	1559.24	1630.45
pig14084;pig14085	C2ORF29;C2orf29;D1BWG0212E;D1Bwg0212e	ENSSSCT00000008944	Ssc.9872	ENSSSCG00000008167			Transcribed locus, strongly similar to NP_082319.1 hypothetical protein LOC52846 [Mus musculus]	4856.5	4599.15	2750.16	2485.51	3737.76	3849.46	2593.18	2294.65	4352.41	4399.48	2101.76	2140.57	4828.88	3180.72	3563.38	3768.76	1704.67	1765.73	2104.03	2828.93
pig14832;pig14833	DPY30	ENSSSCT00000009320		ENSSSCG00000008516		DPY30	Protein dpy-30 homolog (Dpy-30-like protein) [Source:UniProtKB/Swiss-Prot;Acc:Q9C005]	6425.1	6949.24	4666.68	5046.98	8950.54	8136.99	5136.84	5164.74	5965.61	7247.94	4100.98	4547.75	6474.54	6636.09	7025.7	9724.09	1707.92	1889.22	1968.2	2514.62
pig14890;pig14891	BRE	ENSSSCT00000009347		ENSSSCG00000008542		BRE	BRCA1-A complex subunit BRE (Brain and reproductive organ-expressed protein)(BRCA1/BRCA2-containing complex subunit 45) [Source:UniProtKB/Swiss-Prot;Acc:Q9NXR7]	4285.71	4179.71	2761.34	2742	4599.15	4312.62	2746.75	2637.05	5075.79	5687.34	2331.08	2321.56	4814.66	3742.23	5099.44	5564.09	1679.55	NA	1686.26	2467.26
pig14899;pig14900	CCDC121	ENSSSCT00000009352		ENSSSCG00000008547		CCDC121	Coiled-coil domain-containing protein 121 [Source:UniProtKB/Swiss-Prot;Acc:Q6ZUS5]	3969.64	3694.36	1962.47	1804.04	2589.38	2873.75	1970.76	1697.95	2644.03	3019.03	NA	1539.17	3042.19	2018.64	2529.92	2824.97	1729.41	1701.67	2076.75	2936.26
pig15101;pig15102	YWHAQ;Ywhaq	ENSSSCT00000009450	Ssc.70171|Ssc.2456	ENSSSCG00000008638	100048964	YWHAQ	Transcribed locus, strongly similar to NP_037185.1 tyrosine 3-monooxygenase/tryptophan 5-monooxygenase activation protein, theta polypeptide [Rattus norvegicus]|Tyrosine 3-monooxygenase/tryptophan 5-monooxygenase activation protein, theta polypeptide	50132.7	45253.9	14601.1	13289.4	26891.9	24087.2	15326.2	13228.4	47983.1	45601.6	12395.1	12913.8	44748.8	29484	27482.5	29699.3	2125.04	2372.4	NA	2298.99
pig15295;pig15296	LOC100153861;SYAP1	ENSSSCT00000013287	Ssc.43513	ENSSSCG00000012148	100153861	LOC100153861	Similar to SYAP1 protein	7772.71	8175.01	4495.57	4866.88	9763.15	7698.34	3619.81	3546.35	6736.7	8128.8	3200.49	3265.28	7143.36	6108.65	6579.95	9041.1	1624.03	1588.12	2143.49	2279.36
pig15539;pig15540	CHST7	ENSSSCT00000013412		ENSSSCG00000012265		CHST7	Carbohydrate sulfotransferase 7 (EC 2.8.2.17)(EC 2.8.2.-)(Chondroitin 6-sulfotransferase 2)(C6ST-2)(N-acetylglucosamine 6-O-sulfotransferase 1)(GlcNAc6ST-4)(Galactose/N-acetylglucosamine/N-acetylglucosamine 6-O-sulfotransferase 5)(GST-5) [Source:UniProtKB/Swiss-Prot;Acc:Q9NS84]	3299.44	3262.7	2330.09	2445.01	2892.53	2482.6	2387.62	2262.84	2404.26	3224.09	1817.84	1925.09	2595.31	2346.28	2576.46	2946.14	1654.97	1641.33	2109.57	2677.96
pig15595;pig15596	WDR45	ENSSSCT00000013439	Ssc.2909	ENSSSCG00000012290			Transcribed locus, strongly similar to NP_001025067.1 WD repeat domain 45 isoform 2 [Homo sapiens]	5790.85	5190.36	3340.25	2719.15	3459.89	4159.14	3349.56	3079.16	4680.36	3827.09	2391.51	2576.21	4147.29	2899.44	3543.93	2588.04	1948.54	1938.31	1864.79	3434
pig16240;pig16241	CUL4B	ENSSSCT00000013782	Ssc.63803	ENSSSCG00000012603			Transcribed locus, strongly similar to NP_001116316.1 im:7150765 [Danio rerio]	3315.01	3119.23	2011.75	1935.3	2679.4	2608.81	1985.06	1815.91	2416.1	2747.07	1597.29	1561.16	2521.04	1958.12	2479.78	2328.12	1644.53	1547.09	2070.97	2354.46
pig16253;pig16254	RHOXF1	ENSSSCT00000013790		ENSSSCG00000012611		RHOXF1	Rhox homeobox family member 1 (Paired-like homeobox protein PEPP-1)(Ovary-, testis- and epididymis-expressed gene protein) [Source:UniProtKB/Swiss-Prot;Acc:Q8NHV9]	4091.7	3778.71	2478.89	2368.01	2878	3422.8	2365.07	2251.88	3104.57	2842.79	1931.86	1986.92	3086.74	2217.91	2977.55	2666.26	1885.17	1870.57	2684.19	3453.34
pig17075;pig17076	OR51C1P	ENSSSCT00000016114		ENSSSCG00000014763		OR51C1P	Seven transmembrane helix receptor [Source:UniProtKB/TrEMBL;Acc:Q8NH68]	4456.77	3613.48	2645.7	2501.59	3227.68	4067.5	2537.41	2325.47	3251.46	2890.08	2140.36	2219.61	3255.43	2367.72	2946.35	2411.56	1817.92	1904.12	NA	2956.22
pig17332;pig17333	USP35	ENSSSCT00000016245		ENSSSCG00000014890		USP35	Ubiquitin carboxyl-terminal hydrolase 35 (EC 3.1.2.15)(Ubiquitin thioesterase 35)(Ubiquitin-specific-processing protease 35)(Deubiquitinating enzyme 35) [Source:UniProtKB/Swiss-Prot;Acc:Q9P2H5]	3117	3125.82	2191.26	2099.46	2669.8	2846.38	2074.93	1937.71	2365.93	2458.85	1616.91	1699.86	2828.62	1864.36	2410.5	2047.01	1677.62	1635.09	1876.19	2419.31
pig18065;pig18066	THYN1;Thyn1	ENSSSCT00000016631	Ssc.12072	ENSSSCG00000015262			Transcribed locus, moderately similar to NP_001007662.1 thymocyte nuclear protein 1 [Rattus norvegicus]	12872.8	13171.1	3420.51	3677.45	7408.52	6234.55	3230.03	3354.82	7448.07	9837.39	2572.93	2638.4	8413.17	8009.77	7228.96	9357.8	2268.15	2182.36	2069.93	3037.8
pig18123;pig18124	PCTK2	ENSSSCT00000016661		ENSSSCG00000015290		PCTK2	Serine/threonine-protein kinase PCTAIRE-2 (EC 2.7.11.22)(PCTAIRE-motif protein kinase 2) [Source:UniProtKB/Swiss-Prot;Acc:Q00537]	4382.32	4634.61	2535.24	2345.22	2892.53	3232.58	2414.13	2192.62	3082.56	3287.12	1891.92	1917.47	3012.22	2412.72	2853.34	2704.03	1559.74	1692.78	2034.15	2636.6
pig18598;pig18599	FAM20B	ENSSSCT00000016911		ENSSSCG00000015524		FAM20B	Protein FAM20B Precursor [Source:UniProtKB/Swiss-Prot;Acc:O75063]	3654.96	3711.25	2055.26	2144.15	2377.1	2433.72	1983.97	1904.06	2331.93	2695.21	NA	1528.44	2253.53	2090.44	2300.38	2614.03	NA	1537.26	1692.2	1936.88
pig18612;pig18613	TOR1AIP1	ENSSSCT00000016918		ENSSSCG00000015530		TOR1AIP1	Torsin-1A-interacting protein 1 [Source:UniProtKB/Swiss-Prot;Acc:Q5JTV8]	4419.61	4917.01	2171.82	2222.78	3011.84	2771.26	2191.84	2058.53	2571.53	3246.48	1825.22	1763.46	2612.47	2213.14	2792.9	3001.64	1785.26	1623.04	1645.08	2353.58
pig18870;pig18871	LGTN	ENSSSCT00000017045	Ssc.37239	ENSSSCG00000015648			Transcribed locus, strongly similar to NP_008824.2 ligatin [Homo sapiens]	6703.19	6721.84	2783.43	2850.26	4619.56	4160.54	2392.72	2356.4	5373.81	5914.66	2210.16	2106.62	5250.38	4289.65	4659.16	5401.51	NA	NA	1654.42	2060.39
pig18880;pig18881	IL19	ENSSSCT00000017050	Ssc.51659	ENSSSCG00000015653	100038024	IL19	Interleukin 19	3588.5	3593.26	2111.1	1991.01	2538.07	2673.7	1976.55	1880.28	2670.43	2983.29	1582.93	NA	2719.86	2205.18	2397.65	2507.06	NA	1627.51	1874.41	2603.85
pig18888;pig18889	PIGR	ENSSSCT00000017054	Ssc.25372	ENSSSCG00000015657	397315	PIGR	Polymeric immunoglobulin receptor	4266.43	3797.29	2328.84	2281.57	2753.94	2963.04	2183.5	2080.28	2775.65	2892.81	1773.19	1754.22	2959.69	2308.61	2658.04	2646.75	1570.43	1707.17	2100.61	2499.65
pig18890;pig18891	FCAMR	ENSSSCT00000017055		ENSSSCG00000015658		FCAMR	High affinity immunoglobulin alpha and immunoglobulin mu Fc receptor Precursor (Fc alpha/mu receptor) [Source:UniProtKB/Swiss-Prot;Acc:Q8WWV6]	4065.38	3662.53	2383.68	2208.5	2675.65	2853.56	2254.54	2083.92	2772.42	3049.68	1777.6	1918.44	2757.43	2337.65	2770.65	2603.4	1874.95	1996.42	2477.73	3323.62
pig19129;pig19130	DCTD;LOC100154836	ENSSSCT00000017176	Ssc.54544	ENSSSCG00000015775	100154836	LOC100154836	Similar to dCMP deaminase	4344.18	4794.52	2009.69	2146.16	2949.77	2937.05	2090.02	1983.28	2561.44	3184.88	1700.72	1769.17	2644.23	2172.93	2929.41	2876.32	1692.2	1637.06	2317.54	3139.07
pig19876;pig19877	FAM117B	ENSSSCT00000017545		ENSSSCG00000016114		FAM117B	Protein FAM117B (Amyotrophic lateral sclerosis 2 chromosomal region candidate gene 13 protein) [Source:UniProtKB/Swiss-Prot;Acc:Q6P1L5]	3192	3454.21	1810.28	1947.71	2544.61	2324.6	1765.86	1710.79	2258.36	2808.75	1543.71	NA	2391.7	2019.19	2409.63	3032.51	1550.01	1602.44	2261.89	2613.19
pig20126;pig20127	FARSB	ENSSSCT00000017668		ENSSSCG00000016226		FARSB	Phenylalanyl-tRNA synthetase beta chain (EC 6.1.1.20)(Phenylalanine--tRNA ligase beta chain)(PheRS) [Source:UniProtKB/Swiss-Prot;Acc:Q9NSD9]	5787.54	6687.69	2764.61	3052.82	4155.93	4069.46	2958.11	3059.35	5444.44	6669.7	2439.56	2333.32	5566.54	5229.16	4998.3	6416.07	1741.24	1663.67	1808.19	2477.16
pig20410;pig20411	DUSP28	ENSSSCT00000017821	Ssc.55701	ENSSSCG00000016366			Transcribed locus, moderately similar to NP_001028747.1 dual specificity phosphatase 28 [Homo sapiens]	3576.11	3985.22	2134.51	2082.91	2507.47	2348.28	2104.64	1996.83	2595.01	3478.54	1697.92	1676.31	2413.2	2293.59	2545.17	2765.97	1640.59	1581.53	2183.41	2692.99
pig20424;pig20425	THAP4	ENSSSCT00000017829		ENSSSCG00000016374		THAP4	THAP domain-containing protein 4 [Source:UniProtKB/Swiss-Prot;Acc:Q8WY91]	3767.74	3807.32	1902.55	2039.88	2497.39	2682.06	1796.5	1710.79	2280.59	2808.18	1599.99	1543.92	2486.35	2035.66	2369.29	2833.44	1591.94	1645.95	2097.59	2416.61
pig20685;pig20686	LOC100158199;WDYHV1	ENSSSCT00000006565	Ssc.41298	ENSSSCG00000005982	100158199	LOC100158199	Similar to Uncharacterized protein C8orf32 homolog	4112.15	4041.9	2273.76	2362.19	3094.35	2709.53	2111.38	2181.03	2644.82	2984.97	1855.76	1817.19	2739.62	2340.49	2561.49	3022	1599.01	1635.85	2172.09	2338.55
pig20913;pig20914	KIAA1429	ENSSSCT00000006691	Ssc.57376	ENSSSCG00000006100			Transcribed locus, strongly similar to NP_056311.2 hypothetical protein LOC25962 isoform 1 [Homo sapiens]	5626.99	5554.33	2410.5	2793.49	4935.31	4432.02	2847.14	3095.47	4892.79	5753.26	2442.78	2341.57	4519.42	4379.48	4932.02	6325.81	1567.43	1606.05	1535.12	1821.55
pig21220;pig21221	LOC100157730;TGS1	ENSSSCT00000006850	Ssc.7323	ENSSSCG00000006251	100157730	LOC100157730	Similar to trimethylguanosine synthase homolog	3258.47	3663.18	1975.61	1858.08	2573.24	2401.55	1888.81	1728.39	2058.5	2594.47	NA	1575	2436.58	2038.15	2336.79	2541.68	1609.46	1659.94	2026.47	2313.43
pig21529;pig21530	SLAMF8	ENSSSCT00000007011	Ssc.38924	ENSSSCG00000006398			Transcribed locus, moderately similar to XP_592485.2 PREDICTED: similar to SLAM family member 8 precursor (B-lymphocyte activator macrophage expressed) (BCM-like membrane protein) [Bos taurus]	2964.79	2746.24	1980.2	1823.33	2265.6	3074	1893.66	1667.4	2661.46	2686.64	1538.22	NA	2714.36	1867.62	2541.72	2207.14	1628.25	1689.04	1988.84	2338.03
pig21776;pig21777	MTX1	ENSSSCT00000007144	Ssc.15607	ENSSSCG00000006523	664654	MTX1	Metaxin 1	4950.64	4503.39	2667.22	2737.39	3117	3208.91	2559.46	2429.74	3686.24	4025.5	2399.21	2302.24	3246.07	2574.88	3145.76	3650.14	1643.02	1532.76	NA	2118.96
pig21825;pig21826	ADAR	ENSSSCT00000007168		ENSSSCG00000006543		ADAR	Double-stranded RNA-specific adenosine deaminase (DRADA)(EC 3.5.4.-)(136 kDa double-stranded RNA-binding protein)(P136)(K88DSRBP)(Interferon-inducible protein 4)(IFI-4) [Source:UniProtKB/Swiss-Prot;Acc:P55265]	2874	2671.61	1910.74	1548.53	2426.43	2804.73	2010.2	1663.91	2856.61	2360.14	1539.15	1549.87	2653.99	1815.39	2356.57	1913.03	1677.62	1774.1	NA	2433.53
pig21990;pig21991	LOC100153923	ENSSSCT00000007257	Ssc.53698	ENSSSCG00000006623	100153923	LOC100153923	Similar to Proteasome (prosome, macropain) subunit, beta type, 4	8505.06	8422.85	4723.45	4885.9	6993.5	5829.6	3211.22	3535.86	6966.94	8593.33	3439.96	3299.89	7086.35	7285.25	6914.41	9239.95	1988.09	1897.56	1614.92	2310.56
pig22035;pig22036	ANXA9;LOC100152685	ENSSSCT00000007279	Ssc.28510	ENSSSCG00000006643	100152685	LOC100152685	Similar to Annexin A9	4687.66	4504.55	2338.14	2371.05	2962.88	2706.6	2151.88	2055.26	2468.81	3029.18	1811.56	1888.81	2608.36	2518.95	2718.89	3143.69	1709.23	1772.7	1993.06	2615.38
pig22066;pig22067	APH1A;LOC100154978	ENSSSCT00000007294		ENSSSCG00000006657	100154978	APH1A	Gamma-secretase subunit APH-1A (APH-1a)(Aph-1alpha)(Presenilin-stabilization factor) [Source:UniProtKB/Swiss-Prot;Acc:Q96BI3]	6044.44	5777.66	3166.91	3032.64	4145.66	4991.96	2617.82	2503.89	4777.35	4747.1	2556.46	2615.44	5162.64	3698.62	5259.73	5551.8	1655.39	1840.7	1862.27	2375.18
pig22082;pig22083	LOC100157814;SF3B4	ENSSSCT00000007303	Ssc.3222	ENSSSCG00000006665	100157814	LOC100157814	Similar to Splicing factor 3b, subunit 4	15926.1	13909.2	4064.85	3424.96	7438.21	7747.9	5265.04	4338.8	14087.4	12305.7	4228.85	4551.23	12897.7	8413.17	6862.69	6944.84	2694.78	2543.62	NA	2529.46
pig22294;pig22295	LOC100158052;RSBN1	ENSSSCT00000007411		ENSSSCG00000006765	100158052	RSBN1	Round spermatid basic protein 1 [Source:UniProtKB/Swiss-Prot;Acc:Q5VWQ0]	3322.32	3970.04	1822.8	1882.62	2377.79	1999.86	1759.35	1689.46	2150.7	2826.65	NA	1531.72	2312.26	2143.86	2273.53	2958.74	NA	1650.15	1669.28	2147.05
pig22322;pig22323	ST7L;St7l	ENSSSCT00000007425	Ssc.8557	ENSSSCG00000006779			Transcribed locus, strongly similar to NP_001007640.1 suppression of tumorigenicity 7-like [Rattus norvegicus]	4297.66	4079.43	2376.88	2472.07	3246.56	2854.24	2352.99	2248.5	2812.04	3081.79	1989.79	2090.07	2776.29	2476.69	3023.07	3160.79	1818.88	1745.36	1826.66	2227.9
pig22766;pig22767	LOC100152329	ENSSSCT00000001099	Ssc.72095	ENSSSCG00000001007	100152329	LOC100152329	Hypothetical protein LOC100152329	8266.91	8244.01	3841.6	3815.57	4428.26	4606.01	3847.97	3721.89	6663.09	6434.31	3232.64	3265.04	6676.71	4713.66	4789.41	5013.34	1882.14	1889.86	1832.81	2995.84
pig22772;pig22773	LOC100155921;WRNIP1	ENSSSCT00000001102	Ssc.2136	ENSSSCG00000001010	100155921	LOC100155921	Similar to WRNIP1 protein	11496.8	10956.6	2757.12	2847.35	5341.65	6579.95	3687.18	3598.31	8298.59	7942.55	3050.67	2937.53	8633.05	5821.71	5035.34	5696.93	NA	NA	1645.56	2445.17
pig22824;pig22825	TMEM14C	ENSSSCT00000001132	Ssc.900	ENSSSCG00000001038			Transcribed locus, strongly similar to NP_001158730.1 transmembrane protein 14C [Homo sapiens]	20792.7	16478.5	8701.56	6182.45	10086.8	11055.5	5412.23	4467.76	17349	11620.9	5310.7	5456.94	12560.1	7726.82	10888.1	8550.44	2801.93	2203.94	1552.29	2708.14
pig23316;pig23317	LOC100152520;LOC100153316	ENSSSCT00000001401		ENSSSCG00000001286	100152520|100153316	NULL	NULL	3078.18	2875.09	2291.53	2256.69	2460.86	3033.61	2282.56	2082.04	2602.09	2561.49	1794.38	1994.93	2817.44	2136.54	2625.43	2267.78	1715.7	1773.11	2133.47	2400.53
pig23571;pig23572	CSNK2B	ENSSSCT00000001551	Ssc.32215	ENSSSCG00000001414	397211	CSNK2B	Casein kinase 2, beta polypeptide	17440.7	16405.1	4103.89	3813.41	6400.74	7137.18	4124.01	3927.89	12830.5	11188.6	3022	2877.86	11620.9	7625.51	6362.04	6859.02	1747.96	1594.66	NA	2243.22
pig24291;pig24292	TNFRSF21	ENSSSCT00000001931	Ssc.38132	ENSSSCG00000001727			Transcribed locus, strongly similar to NP_055267.1 tumor necrosis factor receptor superfamily, member 21 precursor [Homo sapiens]	3493.93	3960.04	1897.26	2044.74	2350.79	1892.22	1697.22	1607.46	2754.45	3583.16	NA	NA	2707.99	2625.47	2832.11	3420.01	1712.33	1736.29	1785.05	2117.43
pig24609	LOC100153432	ENSSSCT00000002089		ENSSSCG00000001864	100153432	NULL	NULL	3663.71	3986.48	2016.88	1926.01	2889.69	2842.84	1985.67	1680.17	2500.04	2843.89	1811.99	1749.33	2599.75	2219.14	2515.05	2910.44	1624.03	1820.44	2032.64	2578.65
pig24671;pig24672	LMAN1L	ENSSSCT00000002127		ENSSSCG00000001899		LMAN1L	Protein ERGIC-53-like Precursor (ERGIC53-like protein)(Lectin mannose-binding 1-like)(LMAN1-like protein) [Source:UniProtKB/Swiss-Prot;Acc:Q9HAT1]	4653.18	3794.83	3130.51	2428.56	3088.43	3993.56	2960.8	2660.07	4136.38	3164.2	2430.48	2565.18	3899.94	2203.82	3462.74	2442.68	2379.29	2180.22	NA	2944.26
pig24891;pig24892	TM9SF1;Tm9sf1	ENSSSCT00000002237	Ssc.17332	ENSSSCG00000001999			Transcribed locus, strongly similar to NP_001012155.1 transmembrane 9 superfamily member 1 precursor [Rattus norvegicus]	5237.11	4997.55	2685.45	2662.68	3936.59	4225.19	2478.86	2264.14	4510.55	4485.29	2681.91	2622.14	4399.48	3315.57	4092.51	4653.18	1591.94	NA	NA	1946.62
pig24905;pig24906	PSME1	ENSSSCT00000002244	Ssc.1163	ENSSSCG00000002006	397572	PSME1	Proteasome (prosome, macropain) activator subunit 1 (PA28 alpha)	8128.8	7974.4	3525.38	3484.5	4991.96	6118.23	2610.65	2446.07	5714.1	5672.61	2434.69	2394.54	5439.75	4041.9	5483	5683.79	1985.17	2001.94	2360.25	3468.46
pig25164;pig25165	LOC100155939;TMEM55B	ENSSSCT00000002389	Ssc.2240	ENSSSCG00000002136	100155939	LOC100155939	Similar to transmembrane protein 55B	2687.81	2570.32	1939.88	1916.58	2390.65	2302.95	1952.01	1673.22	2138.91	2348.16	1638.07	1768.86	2352.24	1942.69	2121.71	2345.82	1733.56	1719.08	1992.33	2139.5
pig25172;pig25173	LOC100153498;OSGEP	ENSSSCT00000002392	Ssc.23844	ENSSSCG00000002138	100153498	LOC100153498	Similar to O-sialoglycoprotein endopeptidase	3009.54	3180.61	2244.05	2089.01	2473.05	2532.47	2041.67	1929.51	2424.69	2750.84	1726.64	1747.24	2667.36	2019.88	2381.01	2253.41	1586.08	1538.29	1925.39	2285.85
pig25661;pig25662	NGB	ENSSSCT00000002667		ENSSSCG00000002399	414438	NGB_PIG	Neuroglobin [Source:UniProtKB/Swiss-Prot;Acc:Q6WZ17]	3770.91	4026.3	1970.79	1958.78	2404.31	1944.26	2010.31	1981.59	2109.44	2929.59	1764.64	1749.84	2377.35	2335.76	2518.54	3319.94	1758.38	1741.92	2170.59	2340.74
pig25687;pig25688	STON2	ENSSSCT00000002681		ENSSSCG00000002412		STON2	Stonin-2 (Stoned B) [Source:UniProtKB/Swiss-Prot;Acc:Q8WXE9]	3168.17	3875.44	1869.49	1988.54	2419.1	2259.72	1974.46	1682.39	2240.62	2786.63	1737	1800.14	2439.26	2309.93	2247.68	2809.26	1729.76	1731.78	2195.65	2469.74
pig26194;pig26195	TALDO1	ENSSSCT00000014042	Ssc.1050	ENSSSCG00000012847			Transcribed locus, strongly similar to NP_006746.1 transaldolase 1 [Homo sapiens]	24043.9	23745.3	13520.3	16765.7	12897.7	11911.6	6187.66	6319.59	21217.6	23548.1	6595.49	6253.5	9710.17	7782.18	13996.9	20079.7	1575.44	1529.2	NA	1746.73
pig26214;pig26215	NAP1L4	ENSSSCT00000014052		ENSSSCG00000012856		NAP1L4	Nucleosome assembly protein 1-like 4 (Nucleosome assembly protein 2)(NAP2) [Source:UniProtKB/Swiss-Prot;Acc:Q99733]	5288.8	5544.38	2504.59	2700.25	2840.45	3059.65	2664.43	2533.14	3295.44	3790.22	2470.8	2375.2	3098.64	2436.04	3493.79	4255.57	1617.58	1581.53	1593.67	2390.08
pig26220;pig26221	NADSYN1	ENSSSCT00000014055		ENSSSCG00000012859		NADSYN1	Glutamine-dependent NAD(+) synthetase (EC 6.3.5.1)(NAD(+) synthase [glutamine-hydrolyzing])(NAD(+) synthetase 1) [Source:UniProtKB/Swiss-Prot;Acc:Q6IA69]	4094.28	4325.71	1908.49	1936.79	2262.64	2708.36	1852.01	1834.51	2549.74	2998.18	1555.75	1535.59	2548.51	2029.46	2577.05	2952.89	NA	1532.76	1674.83	2052.59
pig26240;pig26241	ANO1	ENSSSCT00000014065		ENSSSCG00000012869		ANO1	Anoctamin-1 (Transmembrane protein 16A)(Discovered on gastrointestinal stromal tumors protein 1)(Oral cancer overexpressed protein 2)(Tumor amplified and overexpressed sequence 2) [Source:UniProtKB/Swiss-Prot;Acc:Q5XXA6]	4647.32	4484.41	2221.01	2008.08	2403.27	3595.54	2076.46	1982.75	3213.43	3174.62	1725.55	1568.14	2914.19	2050.57	2878.64	2828.78	1662.66	1799.77	1555.86	2710.63
pig26246;pig26247	FGF4	ENSSSCT00000014067		ENSSSCG00000012870		FGF4	Fibroblast growth factor 4 Precursor (FGF-4)(Heparin secretory-transforming protein)(HST-1)(HST)(Transforming protein KS3)(Heparin-binding growth factor 4)(HBGF-4) [Source:UniProtKB/Swiss-Prot;Acc:P08620]	3767.74	2915.16	2413.8	2153.46	2553.34	3231.61	2230.04	2021.92	2865.7	2599.31	1894.5	1931.38	2858.93	2204.55	2494.41	2492.21	1790.49	1726.04	1912.59	2504.36
pig26461;pig26462	MUS81;Mus81	ENSSSCT00000014180	Ssc.2645|Ssc.29755	ENSSSCG00000012973			Transcribed locus, moderately similar to NP_001020816.1 MUS81 endonuclease homolog [Rattus norvegicus]|Transcribed locus, strongly similar to NP_001039756.1 MUS81 endonuclease homolog [Bos taurus]	4197.61	5051.07	1889.62	2029.04	2335.65	2355.2	2037.67	1993.22	2641.19	3453.11	1538.44	1655.39	2647.15	2240.45	2354.61	3239.26	1670.29	1597.06	1775.46	2391.01
pig26485;pig26486	RELA	ENSSSCT00000014191	Ssc.11443	ENSSSCG00000012981	100135665	RELA	V-rel reticuloendotheliosis viral oncogene homolog A (avian)	3419.06	3268.49	1992.93	2136.99	2356.43	2673.04	2148.59	1882.28	2674.97	3041.64	1808.36	1887.11	2798.12	2045.88	2570.01	2462.4	1747.96	1731.46	1992.4	2380.01
pig26519;pig26520	SLC22A20	ENSSSCT00000014208		ENSSSCG00000012998		SLC22A20	Solute carrier family 22 member 20 (Organic anion transporter 6) [Source:UniProtKB/Swiss-Prot;Acc:A6NK97]	3135.64	3250.76	2380.31	2149.62	3069.04	3140.94	2564.13	2292.65	3101.76	2535.21	2056.94	2085.89	3322.51	2014.11	2674.6	2095.01	1747.96	1943.63	1940.1	2809.97
pig26521	CAPN1	ENSSSCT00000014209		ENSSSCG00000012999		CAN1_PIG	Calpain-1 catalytic subunit (EC 3.4.22.52)(Calpain-1 large subunit)(Calcium-activated neutral proteinase 1)(CANP 1)(Calpain mu-type)(muCANP)(Micromolar-calpain) [Source:UniProtKB/Swiss-Prot;Acc:P35750]	2867.36	2796.86	2165.8	1748.76	2322.03	3080.66	2109.21	1782.59	2511.36	2335.49	1575.37	1686.58	2675.74	1678.21	2252.64	1968.65	NA	1622.53	NA	2141.66
pig26688;pig26689	DAGLA	ENSSSCT00000014297		ENSSSCG00000013079		DAGLA	Sn1-specific diacylglycerol lipase alpha (DGL-alpha)(EC 3.1.1.-)(Neural stem cell-derived dendrite regulator) [Source:UniProtKB/Swiss-Prot;Acc:Q9Y4D2]	3231.91	3730.14	1998.4	2229.56	2224.96	1923.83	1993.22	2022.97	2101.91	2911	1619.55	1689.05	2248.06	2364.47	2429.55	3158.35	1635.8	1772.7	1933.11	2137.91
pig27028;pig27029	ZNF408	ENSSSCT00000014478	Ssc.9909	ENSSSCG00000013255			Transcribed locus, moderately similar to NP_079017.1 zinc finger protein 408 [Homo sapiens]	4066.32	3356.53	2253.86	1967.81	2311.09	3202.95	2165.89	1973.69	3034.41	2384.15	1835.8	1831.47	2653.06	1869.58	2491.18	2076.06	1663.47	1751.53	1908.5	2803.24
pig27318;pig27319	1110004F10RIK;1110004F10Rik;C11ORF58;C11orf58	ENSSSCT00000014617	Ssc.59710|Ssc.1390	ENSSSCG00000013383			Transcribed locus, strongly similar to NP_062746.1 small acidic protein [Mus musculus]	31259	25953.5	8237	6966.94	24167.4	26448	11395	9031.24	27652.7	19828.2	9258.16	9447.2	25763.4	15499.4	23131.4	18552.8	3356.53	2942.31	1595.74	6474.54
pig27514;pig27515	SGTA	ENSSSCT00000014712	Ssc.5072	ENSSSCG00000013467			Transcribed locus, strongly similar to NP_003012.1 small glutamine-rich tetratricopeptide [Homo sapiens]	3702.89	3789.28	1770.88	1761.22	2089.67	2046.26	1736.71	1617.14	2151.57	2629.66	1584.6	1543.21	2295.62	1728	2105.95	2897.74	1573.59	NA	1876.01	2325.08
pig27543;pig27544	C19ORF71;C19orf71;MGC137027	ENSSSCT00000014728	Ssc.28380	ENSSSCG00000013482			Transcribed locus, strongly similar to NP_001070550.1 hypothetical protein LOC768023 [Bos taurus]	3367.24	3150.95	2029.01	2140.04	2590.06	2700.84	2040.51	1788.62	2281.12	2323.47	1836.59	1836.84	2653.24	1997.04	2318.78	2315.93	NA	NA	1890.99	2158.93
pig27796;pig27797	MARCH2;March2	ENSSSCT00000014855	Ssc.2476	ENSSSCG00000013601			Transcribed locus, strongly similar to NP_001029280.1 membrane associated RING-CH finger protein II [Rattus norvegicus]	8894.96	9031.24	3326.89	3727.54	4369.3	4477.82	3038.24	2738.69	5736.25	6261.93	2706.79	2648.88	5340.25	4122.56	4698.48	5685.27	1780.97	1700.3	1528.56	2180.24
pig27800;pig27801	ZNF414	ENSSSCT00000014857	Ssc.19387	ENSSSCG00000013603			Transcribed locus, strongly similar to NP_115746.1 zinc finger protein 414 [Homo sapiens]	4088.23	4498.89	2243.58	2291.86	2322.73	2432.3	2251.97	1955.69	2630.95	2955.46	1807.4	1825.17	2528.79	1914.53	2551.78	2936.85	NA	NA	NA	1778.81
pig28296;pig28297	ILVBL	ENSSSCT00000015108	Ssc.19621	ENSSSCG00000013830			Transcribed locus, strongly similar to NP_006835.2 ilvB (bacterial acetolactate synthase)-like [Homo sapiens]	3201.14	3867.51	1760.14	1748.05	2236.08	2088.25	1708.38	1603.01	2353.78	3144.29	1564.91	1603.46	2313.89	2296.94	2559.36	3294.96	1747.96	1543.68	1620.69	2045.37
pig28312;pig28313	AKAP8L	ENSSSCT00000015116		ENSSSCG00000013838		AKAP8L	A-kinase anchor protein 8-like (AKAP8-like protein)(Neighbor of A-kinase-anchoring protein 95)(Neighbor of AKAP95)(Homologous to AKAP95 protein)(HA95)(Helicase A-binding protein 95)(HAP95) [Source:UniProtKB/Swiss-Prot;Acc:Q9ULX6]	2715.97	2655.54	1679.91	1679.9	2146.68	1925.75	1726.34	1613.81	1924.68	2408.77	1578.4	1677.86	2102.19	1921.75	1982.76	2583.26	1591.56	1534.56	1834.43	1991.45
pig28847;pig28848	POLK	ENSSSCT00000015383		ENSSSCG00000014082		POLK	DNA polymerase kappa (EC 2.7.7.7)(DINB protein)(DINP) [Source:UniProtKB/Swiss-Prot;Acc:Q9UBT6]	3573.59	4385.38	1952.47	1906.9	2457.05	2302.39	1734.78	1618.34	2157.56	2792.9	1603.64	1656.07	2245.18	2372.78	2647.65	3112.64	1620.29	NA	1901.99	1894.88
pig29154;pig29155	KCNN2	ENSSSCT00000015531		ENSSSCG00000014213		KCNN2	Small conductance calcium-activated potassium channel protein 2 (SK2) [Source:UniProtKB/Swiss-Prot;Acc:Q9H2S1]	2781.97	2720.28	1794.89	1831.15	2133.96	2061.16	1724.89	NA	2007.49	2290.82	NA	NA	2216.38	1720.88	1956.55	2439.95	1550.41	NA	1886.55	1876.49
pig29339;pig29340	PPP2CA	ENSSSCT00000015621	Ssc.13983	ENSSSCG00000014298	397656	PPP2CA	Protein phosphatase 2 (formerly 2A), catalytic subunit, alpha isoform	4123.18	5080.26	1847.36	2008.08	2258.03	2117.39	1845.6	1728.65	2122.2	3036.38	1585.44	1705.39	2340.9	2347.22	2570.01	3172.23	1766.26	1532.06	2068.62	2253.49
pig29367;pig29368	LOC515496	ENSSSCT00000015635	Ssc.18103	ENSSSCG00000014311			Transcribed locus, strongly similar to NP_001030386.1 mitochondrial carrier protein-like [Bos taurus]	3554.26	3358.64	2063.85	1933.64	2428.59	2643.31	1936.09	1798.85	2557.55	2929.59	1763.74	1732.44	2605.71	1977.97	2649.64	2421.48	1868.35	1627.51	1873.46	2518.86
pig29375;pig29376	LECT2	ENSSSCT00000015639	Ssc.48751	ENSSSCG00000014315			Transcribed locus, strongly similar to XP_531913.1 PREDICTED: similar to leukocyte cell-derived chemotaxin 2 precursor [Canis familiaris]	2683.86	2444.11	2111.49	1833.75	2143.85	2490.82	2127.57	1828.84	2415.18	2187.09	1763.17	1756.98	2865.14	1781.25	2197.11	2271.03	1590.25	1664.51	1872.05	2141.96
pig29561;pig29562	ARHGAP26	ENSSSCT00000015737		ENSSSCG00000014399		ARHGAP26	Rho GTPase-activating protein 26 (Rho-type GTPase-activating protein 26)(Oligophrenin-1-like protein)(GTPase regulator associated with focal adhesion kinase) [Source:UniProtKB/Swiss-Prot;Acc:Q9UNA1]	2753.18	3213.69	1666.34	1667.89	1925.41	1914.91	NA	NA	2098.55	2508.88	NA	NA	2169.25	1949.16	2130.71	2583.88	1569	NA	1812.8	1958.31
pig29573;pig29574	GRXCR2	ENSSSCT00000015743		ENSSSCG00000014405		GRXCR2	Glutaredoxin domain-containing cysteine-rich protein 2 (Glutaredoxin domain-containing cysteine-rich protein 1-like protein)(GRXCR1-like protein) [Source:UniProtKB/Swiss-Prot;Acc:A6NFK2]	3810.15	3624.39	2092.13	2139.2	2391.88	2392.39	1959.63	1834.01	2282.76	2858.63	1719.91	1725.97	2409.24	2167.78	2220.9	2826.18	1798.39	1642.7	2061.87	2606.66
pig30038;pig30039	VILL	ENSSSCT00000012313		ENSSSCG00000011246		VILL	Villin-like protein [Source:UniProtKB/Swiss-Prot;Acc:O15195]	4008.62	3352.99	1834.94	NA	2287.82	2974.41	1864.71	1550.53	2887.22	2392.21	NA	1535.89	3050.09	1884.44	2723.11	2144.97	1586.74	1729.26	1658.44	2254.34
pig30150;pig30151	EXOSC7;Exosc7	ENSSSCT00000012371	Ssc.27250	ENSSSCG00000011300			Transcribed locus, strongly similar to NP_001094195.1 exosome component 7 [Rattus norvegicus]	4201.64	4273.14	2134.91	2053.31	2350.36	2648.95	2035.8	1960.09	2471.64	3319.49	1985.65	1950.3	2444.29	2324.59	2488.68	3357.31	1881.82	1810.91	1808.83	2309.04
pig30154;pig30155	TMEM42	ENSSSCT00000012373	Ssc.18509	ENSSSCG00000011302			Transcribed locus, strongly similar to NP_653239.1 transmembrane protein 42 [Homo sapiens]	4439.07	5147.49	2266.66	2498.8	2947.72	3422.8	2413.04	2415.25	3695.99	4578.46	2390.86	2395.6	3388.01	3420.01	3649.19	4065.38	1574.2	1740.13	1927.61	2157.24
pig30333;pig30334	APEH	ENSSSCT00000012463	Ssc.3208	ENSSSCG00000011385	396961	APEH	N-acylaminoacyl-peptide hydrolase	3145.05	3519.64	1813.3	1862.26	2305.5	2580.88	1784.84	1848.17	2473.95	3265.61	1832.75	1835.23	2576.24	2572.81	2659.53	3327.61	1670.66	1637.69	1893.17	2252.97
pig30353;pig30354	RBM5	ENSSSCT00000012473		ENSSSCG00000011395		RBM5	RNA-binding protein 5 (RNA-binding motif protein 5)(Putative tumor suppressor LUCA15)(Protein G15)(Renal carcinoma antigen NY-REN-9) [Source:UniProtKB/Swiss-Prot;Acc:P52756]	6917.5	7641.98	2531.61	2757.18	5029.18	5555.55	3952.4	3893.53	6993.5	7833.19	3473.11	3503.36	5233.01	4763.48	5661.44	7648.48	2007.38	1935.22	2001.1	2405.62
pig30359;pig30360	SEMA3F	ENSSSCT00000012476		ENSSSCG00000011398		SEMA3F	Semaphorin-3F Precursor (Semaphorin IV)(Sema IV)(Sema III/F) [Source:UniProtKB/Swiss-Prot;Acc:Q13275]	4526.31	4852.01	1954.97	2002.69	2118.64	2311.79	1949.84	1896.66	2655.95	3316.19	1662.41	1659.84	2566.43	2320.37	2827.93	3350.5	1770.05	1577.54	1588	2073.61
pig30383;pig30384	ZMYND10	ENSSSCT00000012488	Ssc.34562	ENSSSCG00000011408			Transcribed locus, strongly similar to NP_001035638.1 zinc finger, MYND-type containing 10 [Bos taurus]	4603.76	4657.52	2008.56	2140.24	2461.5	2547.24	1997.75	1822.22	2682.68	2850.41	1825.9	1764.57	2662.29	1973.96	2820.71	3123.72	1740.74	1801.86	1877.35	2347.19
pig30642;pig30643	IL5RA	ENSSSCT00000012618	Ssc.69951	ENSSSCG00000011528	100137085	IL5RA	Interleukin 5 receptor, alpha	4780.67	4617.5	1993.99	1965.53	2329.49	2637.79	1956.72	1812.4	2380.51	2682.01	1718.03	1715.75	2680.44	1997.26	2399.27	2842.62	1548.51	1609.94	2053.5	2138.04
pig31864;pig31865	LOC100153797;SECISBP2	ENSSSCT00000010504	Ssc.4927	ENSSSCG00000009583	100153797	LOC100153797	Similar to SECIS-binding protein 2 (Selenocysteine insertion sequence-binding protein 2)	3644	3979.44	2163.64	2273.22	2333.86	2584.78	2154.55	2034.16	2363.47	3187.32	1988.26	2098.44	2575.65	2332.3	2665.97	3272.47	1889.69	1871.96	2124.41	2473.55
pig32157;pig32158	SH3RF1	ENSSSCT00000010652		ENSSSCG00000009716		SH3RF1	Putative E3 ubiquitin-protein ligase SH3RF1 (EC 6.3.2.-)(SH3 domain-containing RING finger protein 1)(Plenty of SH3s)(Protein POSH)(SH3 multiple domains protein 2)(RING finger protein 142) [Source:UniProtKB/Swiss-Prot;Acc:Q7Z6J0]	4834.96	4894.55	2459.82	2498.22	2528.79	2749.01	2401.35	2224.16	2879.36	3444.82	2191.78	2148.76	3005.6	2439.31	3189.07	3727.72	1835.58	1863.16	2470.32	2793.8
pig32399	HVCN1;LOC100152115	ENSSSCT00000010771		ENSSSCG00000009827	100152115	HVCN1	Voltage-gated hydrogen channel 1 (Hydrogen voltage-gated channel 1)(HV1)(Voltage sensor domain-only protein) [Source:UniProtKB/Swiss-Prot;Acc:Q96D96]	3816.75	4393.84	2088.2	2205.4	2251.46	2944.34	1875.01	1872.67	2338.98	3066.29	1843.46	1777.2	2475.8	2390.53	2460.93	3508.07	1810.38	1827.9	2089.95	2439.01
pig32953;pig32954	LOC100155945;SERPIND1	ENSSSCT00000011054	Ssc.17835	ENSSSCG00000010093	100155945	LOC100155945	Similar to heparin cofactor II	3230.47	3291.97	1566.77	NA	1880.62	1999.31	1535.31	NA	2066.07	2698.28	NA	1552.22	2132.72	1955.25	2146.65	2960.97	1644.85	1603.3	1773.06	1989.72
pig32994;pig32995	LOC100156779;TSSK2	ENSSSCT00000011074	Ssc.46970	ENSSSCG00000010113	100156779	LOC100156779	Similar to serine/threonine kinase 22B	3969.64	3368.71	2131.96	1919.74	2214.38	2946.14	1937.86	1814.61	2723.95	2826.07	1681.41	1643.76	2593.71	1999.24	2695.67	2534.86	1778.78	1732.58	1837.58	2531.12
pig33210;pig33211	LOC100157357;ZNF365	ENSSSCT00000011188	Ssc.72917	ENSSSCG00000010222	100157357	LOC100157357	Similar to zinc finger protein 365	4079.43	4784.7	1935.54	1998.79	2157.08	2778.04	1983.8	1879.39	2228.92	2903.99	1754.82	1738.89	2294.03	2304.93	2472.38	3510.91	1552.43	NA	NA	1813.26
pig33214;pig33215	EGR2	ENSSSCT00000011190	Ssc.51140	ENSSSCG00000010224	100038004	EGR2	Early growth response 2	3564.7	3629.12	1887.29	1919.14	2085.72	2375.96	1831.91	1785.97	2023.64	2705.43	1611.58	1684.27	2193.96	2195.67	2476.05	2762.16	1616.51	NA	NA	1768.39
pig34321;pig34322	C10ORF122;C10orf122;MGC133583	ENSSSCT00000011752	Ssc.47210	ENSSSCG00000010740			Transcribed locus, moderately similar to NP_001070494.1 hypothetical protein LOC767956 [Bos taurus]	2662.84	2474.29	1686.2	1696.85	2052.03	2246.43	1678.09	NA	2026.84	2179.61	1606.01	1543.46	2261.01	1677.06	1923.08	2115.34	NA	1566.48	1847.79	1880.17
pig34541;pig34542	DYNLT1	ENSSSCT00000004485	Ssc.1860	ENSSSCG00000004056	100158053	DYNLT1	Dynein, light chain, Tctex-type 1	5118.31	5398.88	2689.32	2865.27	4096.02	4174.71	2816.03	2775.61	4465.99	5493.9	2545.66	2560.95	4252.12	4241.27	3809.74	4815.76	2151.86	2144.54	2805.04	3833.66
pig34562;pig34563	CLDN20	ENSSSCT00000004496		ENSSSCG00000004067	100153817	C3VMW6_PIG	Claudin 20 [Source:UniProtKB/TrEMBL;Acc:C3VMW6]	6734.04	6697.89	2337.51	2365.57	2649.5	2857.94	2108.72	2086.53	2897.22	3789.53	1837.03	1804.74	2907.81	2608.16	3289.15	4188.31	1998.89	1907.09	1747.96	2238.36
pig34856;pig34857	SAMD3	ENSSSCT00000004643		ENSSSCG00000004202		SAMD3	Sterile alpha motif domain-containing protein 3 [Source:UniProtKB/Swiss-Prot;Acc:Q8N6K7]	2934.82	3165.49	1772.5	1688.25	1884.65	2088.41	1804.55	NA	2034.39	2248.18	1541.29	NA	2215.1	1737.37	1948.79	2374.95	1564.74	1589.36	1844.79	1942.41
pig35136;pig35137	GJA10	ENSSSCT00000004786		ENSSSCG00000004330		GJA10	Gap junction alpha-10 protein (Connexin-62)(Cx62) [Source:UniProtKB/Swiss-Prot;Acc:Q969M2]	4696.88	4175.64	2152.45	2096.78	2366.8	3085.93	2140.89	1869.79	3111.38	3305.35	1938.79	1909.08	2785.06	2159.03	2993.88	3231.86	1851.94	2012.38	2222.01	2744.34
pig36471;pig36472	ITGA11;LOC100155685	ENSSSCT00000005473		ENSSSCG00000004961	100155685	ITGA11	Integrin alpha-11 Precursor [Source:UniProtKB/Swiss-Prot;Acc:Q9UKX5]	2811.13	2839.07	2003.22	2038.64	1951.03	2159.44	1817.79	1723.96	2064.37	2453.29	1674.97	1684.27	2206.5	2004.56	2141.28	2521.42	1688.06	1694.41	1830.94	1901.79
pig36473;pig36474	CORO2B	ENSSSCT00000005474		ENSSSCG00000004962		CORO2B	Coronin-2B (Coronin-like protein C)(Clipin-C)(Protein FC96) [Source:UniProtKB/Swiss-Prot;Acc:Q9UQ03]	2936.16	2726.07	1821.96	1840.5	2020.79	2055.6	1801.3	1645.14	2048.86	2566.76	1634.69	1574.21	2281.5	2056.05	2265.24	2901.06	1649.31	NA	1732.76	1756.84
pig36561	LOC100156494;RPL36A;rpl36a	ENSSSCT00000005521	Ssc.2707	ENSSSCG00000005005			Transcribed locus, strongly similar to NP_775369.1 ribosomal protein L36A [Danio rerio]	47311.5	40647.1	15593	10932	40250.1	38968.3	19728.8	20030.9	50421.9	35021.4	20710.7	20578.5	31965.6	25594.7	42738.1	40856.2	4388.61	3340.38	2598.94	7030.29
pig36754;pig36755	SYT16	ENSSSCT00000005620		ENSSSCG00000005098		SYT16	Synaptotagmin-16 (Synaptotagmin XIV-related protein)(Synaptotagmin 14-like protein)(Chr14Syt) [Source:UniProtKB/Swiss-Prot;Acc:Q17RD7]	3360.95	3250.24	1875.44	1845.98	1911.53	2397.39	1851.82	1643.03	2421.54	2479.78	1545.88	1607.59	2398.94	1924.1	2171.19	2853.34	1626.67	1555.92	NA	1791.38
pig36760;pig36761	AEN	ENSSSCT00000005624		ENSSSCG00000005102		AEN	Apoptosis-enhancing nuclease (EC 3.1.-.-)(Interferon-stimulated 20 kDa exonuclease-like 1) [Source:UniProtKB/Swiss-Prot;Acc:Q8WTP8]	3745.94	3554.78	1929.36	1936.79	2090.31	2813.66	1965.91	1786.89	2773.89	2845.75	1626.87	1583.37	2587.5	1972.44	2595.87	2864.88	1725.96	1655.24	1698.11	2384.73
pig03474	LOC100155889	ENSSSCT00000007961|ENSSSCT00000007958	Ssc.7335	ENSSSCG00000007276|ENSSSCG00000007273	100155889	LOC100155889	Similar to Eukaryotic translation initiation factor 2, subunit 2 beta, 38kDa	14164	17601.1	6699.88	8792.26	17950.1	16333.5	7513.66	5963	12000.8	13321.5	4817.89	4820.79	11661.8	7267.98	14737.8	17440.7	1854.4	NA	1658.1	3321.53
pig06181	IPO5;LOC100152933	ENSSSCT00000010426|ENSSSCT00000010427	Ssc.59130	ENSSSCG00000009510|ENSSSCG00000009509	100152933	LOC100152933|NULL	NULL|Similar to importin 5	11620.9	15499.4	5815.6	6579.95	16765.7	13367.3	6672.46	6193.93	12189.2	14164	6054.04	6350.35	13289.4	8828.16	15543.8	17314.4	2212.85	1622.53	2089.14	5220.64
pig15792	LOC100157046	ENSSSCT00000013546|ENSSSCT00000013547	Ssc.29803	ENSSSCG00000012388|ENSSSCG00000012389	100157046	LOC100157046	Similar to E3 ubiquitin-protein ligase Praja1 (Praja-1) (RING finger protein 70)	4695.02	4344.51	2244.05	2546.99	2784.43	2886.47	2330.86	2379.16	2821.8	3544.38	1784.51	1714.31	3142.64	2493.62	2989.36	3560.93	1633.53	NA	1709.86	2147.49
pig24057	LOC100156760	ENSSSCT00000001804|ENSSSCT00000001810	Ssc.55576	ENSSSCG00000001627|ENSSSCG00000001623	100156760	LOC100156760	Similar to over-expressed breast tumor protein	4658.12	4466.45	2039.62	2128.65	2578.41	2195.07	2007.7	1875.56	2466.49	2890.91	1870.99	1748.46	2593.71	2141	2790.6	3211.81	NA	1657.85	2032.22	2310.56
pig37939	C9ORF78;C9orf78;LOC100153129;LOC100155911	ENSSSCT00000006242|ENSSSCT00000006258|ENSSSCT00000006252	Ssc.70136|Ssc.22334|Ssc.72435	ENSSSCG00000005677|ENSSSCG00000005691|ENSSSCG00000005685	100155911|100153129	NULL|LOC100155911|LOC100153129	NULL|Similar to Uncharacterized protein C9orf78 (Hepatocellular carcinoma-associated antigen 59)|Transcribed locus, strongly similar to NP_057604.1 chromosome 9 open reading frame 78 [Homo sapiens]	5604.09	4978.4	2869.19	2965.49	2813.97	3558.26	2827.47	2788.44	4151.38	4755.89	2727.84	2805.38	3805.9	3731.37	3474.79	3948.55	1670.66	1636.51	1905.38	2047.65
pig14603;pig14604	RTN4	ENSSSCT00000009206|ENSSSCT00000009205	Ssc.42832	ENSSSCG00000008408	100170118	RTN4|Q6IG15_PIG	RTN4-Aw Fragment [Source:UniProtKB/TrEMBL;Acc:Q6IG15]|Reticulon 4	8392.58	8361.31	5492.66	5849.23	8266.91	7380.05	5017.7	4966.32	8810.24	10461.1	4390.55	4373.42	12409.3	9732.86	7828.76	10474.3	1728.15	1604.11	1691.26	2632.45
pig15551;pig15552	UBA1;UBE1X;Uba1	ENSSSCT00000013418|ENSSSCT00000013417	Ssc.33809|Ssc.1875|Ssc.70443|Ssc.57575	ENSSSCG00000012270	397312	UBE1X	Transcribed locus, strongly similar to NP_001014102.1 ubiquitin-activating enzyme E1 [Rattus norvegicus]|Ubiquitin-activating enzyme E1	9849.38	10484.7	5885.34	5499.77	7807.48	6621.56	5297.9	5035.34	9534.45	10021	4726.16	4857.82	10245.4	7687.91	6223.77	7012.71	1977.33	1743.34	NA	3241.25
pig21476	ITLN2;LOC100152042;LOC100157275	ENSSSCT00000006984|ENSSSCT00000006983	Ssc.72261|Ssc.21804|Ssc.73094	ENSSSCG00000006373	100157275|100144619|100152042	ITLN2|B2ZFL4_PIG|LOC100157275	Similar to intelectin 2|Intelectin 2|Omentin [Source:UniProtKB/TrEMBL;Acc:B2ZFL4]|Transcribed locus, strongly similar to NP_001121925.1 intelectin 2 [Sus scrofa]	3189.17	3635.68	1911.94	1916.58	2360.71	2058.96	1946.25	1742.32	2254.02	2861.97	NA	NA	2243.1	2179.07	2308.3	3118.47	1563.3	1594.99	1847.56	2223.07
pig21786;pig21787	KRTCAP2	ENSSSCT00000007149|ENSSSCT00000007148		ENSSSCG00000006527		KRTCAP2	Keratinocyte-associated protein 2 (KCP-2) [Source:UniProtKB/Swiss-Prot;Acc:Q8N6L1]	22204.8	19564.7	4417.94	4593.54	11733	12322.5	5101.66	4786.76	17314.4	17835.3	3868.14	3717.53	18552.8	13579.2	12349.2	14370	1588.92	NA	1530.12	2228.94
pig22783;pig22784	F13A1;LOC100153504	ENSSSCT00000001110|ENSSSCT00000001111	Ssc.29532	ENSSSCG00000001018	100153504	F13A1|LOC100153504	Coagulation factor XIII A chain Precursor (Coagulation factor XIIIa)(EC 2.3.2.13)(Protein-glutamine gamma-glutamyltransferase A chain)(Transglutaminase A chain) [Source:UniProtKB/Swiss-Prot;Acc:P00488]|Similar to coagulation factor XIII A1 subunit	3977.28	3467.04	2187.48	2051.96	2359.68	3593.26	2023.21	1803.46	2701.08	2504.68	1662.97	1584.96	2631.95	1912	2535.57	2539.07	1620.29	1700.81	1790.56	2539.04
pig23253;pig23254	MOG	ENSSSCT00000001363|ENSSSCT00000001362	Ssc.28215	ENSSSCG00000001248	100141421	MOG|NP_001116611.1	myelin oligodendrocyte glycoprotein [Source:RefSeq peptide;Acc:NP_001116611]|Myelin oligodendrocyte glycoprotein	2308.79	2713.4	1775.63	1800.66	2172.09	1923.34	1729.42	1748.47	1959.06	2552.1	1629.87	1575	2135.55	2063.28	2033.89	2805.97	NA	1538.94	1786.69	2080.79
pig23583;pig23584	SBAB-707F1.10;SLC44A4;Slc44a4	ENSSSCT00000001556|ENSSSCT00000001557	Ssc.4668	ENSSSCG00000001419			Transcribed locus, strongly similar to NP_997706.1 solute carrier family 44, member 4 [Rattus norvegicus]	3438.21	3712.4	2144.93	2017.61	2331.89	3567.69	2087	1840.17	2799.49	2745.39	1723.43	1780.03	2698.81	1872.51	2775.08	2290.92	1608.79	1674.42	1983.42	3089.69
pig25966	DYNC1H1	ENSSSCT00000002818|ENSSSCT00000002819	Ssc.42610|Ssc.51832	ENSSSCG00000002538	100037291	DYNC1H1	Dynein, cytoplasmic 1, heavy chain 1|Transcribed locus, strongly similar to NP_001367.2 cytoplasmic dynein 1 heavy chain 1 [Homo sapiens]	2807.69	2774.66	1772.5	1780.01	2179.88	2344.3	1704.03	1704.97	1970.42	2337.19	NA	1530.79	2341.46	1673.78	2138.43	2234.43	NA	NA	1871.64	2455.64
pig28609;pig28610	MGC137030	ENSSSCT00000015265|ENSSSCT00000015264	Ssc.33648	ENSSSCG00000013975		NULL	NULL|Transcribed locus, moderately similar to NP_001070549.1 hypothetical protein LOC768022 [Bos taurus]	3342.44	2833.99	1724.95	1781.66	2129.05	2302.95	1684.79	NA	2203.39	2456.11	NA	NA	2286.43	2063.28	2233.44	2596.1	NA	1576.39	2030.5	2056.51
pig31362;pig31363	LOC100152519	ENSSSCT00000012976|ENSSSCT00000012977	Ssc.26290	ENSSSCG00000011863	100152519	LOC100152519|A4GVX5_PIG	Similar to Integrin beta-5|Integrin beta 5 Fragment [Source:UniProtKB/TrEMBL;Acc:A4GVX5]	7917	7475.35	2857.99	2765.26	3716.31	5096.38	3073.04	2913.51	7300.4	7380.05	2815.79	2698.11	7106.69	4941.25	5063.82	5910.96	1742.4	1690.97	1877.05	2252.97
pig31590;pig31591	GPR128	ENSSSCT00000013089|ENSSSCT00000013088		ENSSSCG00000011962		GPR128	Probable G-protein coupled receptor 128 Precursor [Source:UniProtKB/Swiss-Prot;Acc:Q96K78]	3500.78	3940.18	1808.46	1856.75	1914.91	2579.35	1844.76	1720.21	2029.67	2593.2	1631.34	1578.74	2168.66	1851.75	2242.48	2845.93	1575.14	NA	NA	1778.81
pig39244	HBP;HEBP1	Ssc#S35174096	Ssc.2306		494567	HBP	Heme-binding protein	18003.3	14737.8	9680.64	8967.73	6414.56	8034.35	4472.6	4039.04	14119.2	11640.2	4345.66	4035.22	12955.2	9470.99	8408.01	8608.06	1911.78	2173.29	1754.54	2381.04
pig39413	MAT2A	Ssc#S35166898	Ssc.2649				Transcribed locus, strongly similar to NP_005902.1 methionine adenosyltransferase II, alpha [Homo sapiens]	11030.1	11733	4285.71	4483.71	6333.27	5452.07	4469.88	4776.25	9585.94	11176.1	4221.88	4120.21	7385.06	8055.52	8882.54	10051	2168.55	2110.81	2383.68	3364.16
pig39483;pig39484	LOC780439	Ssc#S18553614	Ssc.2773		780439	LOC780439	Extracellular superoxide dismutase	4907.39	4748.73	2365.36	2314.28	2302.62	3067.21	2333	2123.72	2867.47	3426.28	2046.86	1917.8	2795.94	2437.4	2953.65	3457.85	1804.22	1942.52	1705.88	2223.41
pig39763	COG1	Ssc#S35173877	Ssc.3387				Transcribed locus, moderately similar to NP_061184.1 component of oligomeric golgi complex 1 [Homo sapiens]	4676.52	4496.22	2551.61	2632.6	2777	3536.43	2628.32	2508.88	4719.48	4446.59	2304.55	2176.89	3991.69	3508.07	3545.5	4252.12	1678.69	NA	1530.05	1628.59
pig40774	LOC100157274;PITPNB	Ssc#S35174312	Ssc.5369		100157274	LOC100157274	Similar to Phosphatidylinositol transfer protein beta isoform (PtdIns transfer protein beta) (PtdInsTP) (PI-TP-beta)	6936.32	7331.1	3835.85	4335.46	7030.29	6198.98	4852.01	5267.93	6264.84	7565.24	5258.73	4768.15	6041.29	6749.32	7875.9	9319.27	1798.39	1794.09	1562.16	1786.45
pig40832;pig40833	RCE1	Ssc#S18556164	Ssc.5482				Transcribed locus, strongly similar to NP_005124.1 prenyl protein peptidase RCE1 isoform 1 [Homo sapiens]	3219.79	3411.98	1614.98	NA	1946.7	2287.14	1650.46	NA	2348.28	2656.56	1532.17	NA	2169.01	1946.19	2239.7	2680.64	1663.96	1666.76	1678.74	2111.55
pig44885	DPP8	Ssc#S26727700	Ssc.12397				Transcribed locus, moderately similar to NP_060213.2 dipeptidyl peptidase 8 isoform 2 [Homo sapiens]	2634.47	2717.41	1894.6	1900.92	1901.22	1946.62	1770.05	1719.83	2077.69	2550.31	1684.28	1768.71	2239.57	2022.16	2017.7	2504.36	1672.26	1532.06	2190.16	2010.18
pig46495	GRCC10;Grcc10	Ssc#S50179111	Ssc.15584				Transcribed locus, strongly similar to NP_038563.1 C10 protein [Mus musculus]	11145.5	9793.12	5475.68	5880.91	14200.1	14431.4	5066.05	5167.82	10258.8	11489.7	7044.15	6676.71	10311	10162	14119.2	17601.1	2044.79	2360.35	2033.64	2095.4
pig46793	SLC4A2;Slc4a2	Ssc#S6078048	Ssc.16416				Transcribed locus, strongly similar to NP_033233.2 solute carrier family 4 (anion exchanger), member 2 [Mus musculus]	3327.73	3587.72	1677.97	1835.22	1827.36	2092.78	1757.31	1652.5	2267.4	2938.36	1657.94	1623.22	2228.93	2128.3	2292.39	3061.3	1544.02	1763.94	1802.92	1830.24
pig47044	SNW1	Ssc#S35172818	Ssc.17288				Transcribed locus, strongly similar to NP_036377.1 SKI-interacting protein [Homo sapiens]	9862.84	11351.5	3730.65	4340.39	6362.04	7619.59	4195.02	4259.52	7233.85	8864.31	5870.39	6158.45	6434.31	6455.93	7513.66	10042.1	1626.99	2185.98	NA	1704.34
pig47051;pig47052	AG2	Ssc#S35173788	Ssc.17312				Transcribed locus, strongly similar to NP_001138505.1 hypothetical protein LOC387763 [Homo sapiens]	58577.2	57897.6	4115.51	4601.34	11953.3	14389.3	40026.6	40813.4	57849.6	58829.5	5029.18	4797.75	48315.8	43043.2	10902.4	13909.2	1939.74	2316.59	2203.96	2254.34
GO enrichment
Annotation Cluster 1	Enrichment Score: 1.6975457676496848
Category	Term	Count	%	PValue	Genes	List Total	Pop Hits	Pop Total	Fold Enrichment	Bonferroni	Benjamini	FDR
GOTERM_BP_FAT	GO:0006396~RNA processing	13	8.90411	0.000759473	PABPN1, RPL36A, EXOSC7, RBM5, SNW1, SF3B4, SLBP, PPP2CA, NOP56, TGS1, POP7, ADAR, KIAA1429	102	547	13528	3.15202	0.488736	0.488736	1.17441
GOTERM_BP_FAT	GO:0016071~mRNA metabolic process	10	6.84932	0.00177306	PABPN1, RPL36A, DCP1B, RBM5, SNW1, TGS1, SF3B4, SLBP, KIAA1429, ADAR	102	370	13528	3.58453	0.791331	0.543197	2.72167
GOTERM_MF_FAT	GO:0003723~RNA binding	14	9.58904	0.00213272	PABPN1, GTF3A, RPL36A, EXOSC7, SECISBP2, RBM5, RPS4X, SF3B4, RPS5, SLBP, FARSB, LGTN, NOP56, ADAR	96	718	12983	2.63698	0.436909	0.436909	2.76652
GOTERM_BP_FAT	GO:0006397~mRNA processing	9	6.16438	0.00275123	PABPN1, RPL36A, RBM5, SNW1, TGS1, SF3B4, SLBP, KIAA1429, ADAR	102	321	13528	3.71853	0.9122	0.55554	4.19334
SP_PIR_KEYWORDS	mrna processing	8	5.47945	0.00347981	PABPN1, RBM5, SNW1, THOC5, SF3B4, SLBP, KIAA1429, ADAR	145	260	19235	4.0817	0.572822	0.246871	4.41094
GOTERM_BP_FAT	GO:0008380~RNA splicing	8	5.47945	0.00535681	PABPN1, RPL36A, PPP2CA, RBM5, SNW1, TGS1, SF3B4, KIAA1429	102	284	13528	3.73598	0.991286	0.6127	8.01247
GOTERM_BP_FAT	GO:0000375~RNA splicing, via transesterification reactions	6	4.10959	0.00575045	PABPN1, RPL36A, RBM5, SNW1, TGS1, SF3B4	102	153	13528	5.20108	0.993856	0.572036	8.57691
GOTERM_BP_FAT	GO:0000377~RNA splicing, via transesterification reactions with bulged adenosine as nucleophile	6	4.10959	0.00575045	PABPN1, RPL36A, RBM5, SNW1, TGS1, SF3B4	102	153	13528	5.20108	0.993856	0.572036	8.57691
GOTERM_BP_FAT	GO:0000398~nuclear mRNA splicing, via spliceosome	6	4.10959	0.00575045	PABPN1, RPL36A, RBM5, SNW1, TGS1, SF3B4	102	153	13528	5.20108	0.993856	0.572036	8.57691
SP_PIR_KEYWORDS	rna-binding	11	7.53425	0.00752162	PABPN1, GTF3A, RPL36A, EXOSC7, RBM5, SECISBP2, THOC5, RPS4X, SF3B4, SLBP, ADAR	145	540	19235	2.70223	0.841534	0.369065	9.30858
GOTERM_CC_FAT	GO:0030529~ribonucleoprotein complex	10	6.84932	0.021738	PABPN1, RPL36A, RBM5, SNW1, NOP56, RPS4X, RPS5, SF3B4, POP7, SLBP	103	515	12782	2.40965	0.974531	0.840409	23.4571
SP_PIR_KEYWORDS	mrna splicing	5	3.42466	0.0722456	RBM5, SNW1, THOC5, SF3B4, KIAA1429	145	209	19235	3.17357	1	0.898443	62.1085
SMART	SM00360:RRM	4	2.73973	0.168595	PABPN1, RPL36A, RBM5, SF3B4	62	211	9079	2.77603	0.999995	0.997742	84.8598
UP_SEQ_FEATURE	domain:RRM 1	3	2.05479	0.176686	RPL36A, RBM5, SF3B4	145	101	19113	3.91526	1	1	93.7032
UP_SEQ_FEATURE	domain:RRM 2	3	2.05479	0.176686	RPL36A, RBM5, SF3B4	145	101	19113	3.91526	1	1	93.7032
INTERPRO	IPR000504:RNA recognition motif, RNP-1	4	2.73973	0.221112	PABPN1, RPL36A, RBM5, SF3B4	129	211	16659	2.44814	1	1	96.5181
INTERPRO	IPR012677:Nucleotide-binding, alpha-beta plait	4	2.73973	0.225142	PABPN1, RPL36A, RBM5, SF3B4	129	213	16659	2.42516	1	1	96.7525
SP_PIR_KEYWORDS	Spliceosome	3	2.05479	0.22665	RBM5, SNW1, SF3B4	145	120	19235	3.31638	1	0.95653	96.4071
GOTERM_CC_FAT	GO:0005681~spliceosome	3	2.05479	0.284022	RBM5, SNW1, SF3B4	103	132	12782	2.82039	1	0.999655	98.2816
Annotation Cluster 2	Enrichment Score: 1.1988867469468072
Category	Term	Count	%	PValue	Genes	List Total	Pop Hits	Pop Total	Fold Enrichment	Bonferroni	Benjamini	FDR
GOTERM_BP_FAT	GO:0043065~positive regulation of apoptosis	9	6.16438	0.0150657	SH3RF1, DUSP1, APH1A, AEN, PPP2CA, IL19, RBM5, PSENEN, NR3C1	102	430	13528	2.77592	0.999998	0.812791	21.025
GOTERM_BP_FAT	GO:0043068~positive regulation of programmed cell death	9	6.16438	0.0156484	SH3RF1, DUSP1, APH1A, AEN, PPP2CA, IL19, RBM5, PSENEN, NR3C1	102	433	13528	2.75669	0.999999	0.787204	21.7485
GOTERM_BP_FAT	GO:0010942~positive regulation of cell death	9	6.16438	0.0160459	SH3RF1, DUSP1, APH1A, AEN, PPP2CA, IL19, RBM5, PSENEN, NR3C1	102	435	13528	2.74402	0.999999	0.760295	22.2384
GOTERM_BP_FAT	GO:0042981~regulation of apoptosis	12	8.21918	0.0371777	RTN4, SH3RF1, DUSP1, APH1A, RELA, AEN, PPP2CA, IL19, RBM5, PSENEN, NR3C1, FGF4	102	804	13528	1.97951	1	0.923721	44.5172
GOTERM_BP_FAT	GO:0043067~regulation of programmed cell death	12	8.21918	0.0395006	RTN4, SH3RF1, DUSP1, APH1A, RELA, AEN, PPP2CA, IL19, RBM5, PSENEN, NR3C1, FGF4	102	812	13528	1.96001	1	0.906747	46.5624
GOTERM_BP_FAT	GO:0010941~regulation of cell death	12	8.21918	0.0403974	RTN4, SH3RF1, DUSP1, APH1A, RELA, AEN, PPP2CA, IL19, RBM5, PSENEN, NR3C1, FGF4	102	815	13528	1.9528	1	0.897277	47.333
GOTERM_BP_FAT	GO:0016265~death	10	6.84932	0.0911825	RTN4, TNFRSF21, APH1A, UBA1, AEN, IL19, RBM5, BRE, PSENEN, AFG3L2	102	724	13528	1.83187	1	0.97454	77.3873
GOTERM_BP_FAT	GO:0006917~induction of apoptosis	6	4.10959	0.0913404	SH3RF1, APH1A, AEN, PPP2CA, IL19, PSENEN	102	320	13528	2.48676	1	0.970521	77.4483
GOTERM_BP_FAT	GO:0012502~induction of programmed cell death	6	4.10959	0.092263	SH3RF1, APH1A, AEN, PPP2CA, IL19, PSENEN	102	321	13528	2.47902	1	0.962653	77.8017
GOTERM_BP_FAT	GO:0006915~apoptosis	8	5.47945	0.163061	RTN4, TNFRSF21, APH1A, AEN, IL19, RBM5, BRE, PSENEN	102	602	13528	1.76249	1	0.985708	93.72
GOTERM_BP_FAT	GO:0008219~cell death	9	6.16438	0.168393	RTN4, TNFRSF21, APH1A, UBA1, AEN, IL19, RBM5, BRE, PSENEN	102	719	13528	1.66015	1	0.984623	94.314
GOTERM_BP_FAT	GO:0012501~programmed cell death	8	5.47945	0.171799	RTN4, TNFRSF21, APH1A, AEN, IL19, RBM5, BRE, PSENEN	102	611	13528	1.73653	1	0.982745	94.6655
SP_PIR_KEYWORDS	Apoptosis	5	3.42466	0.319236	TNFRSF21, AEN, IL19, RBM5, BRE	145	381	19235	1.74088	1	0.96495	99.3101
Annotation Cluster 3	Enrichment Score: 1.167351417391698
Category	Term	Count	%	PValue	Genes	List Total	Pop Hits	Pop Total	Fold Enrichment	Bonferroni	Benjamini	FDR
GOTERM_MF_FAT	GO:0000287~magnesium ion binding	8	5.47945	0.0476544	POLK, MAT2A, MUS81, ITGA11, FARSB, ILVBL, TSSK2, ATP8A1	96	452	12983	2.39362	0.999998	0.987452	47.356
UP_SEQ_FEATURE	metal ion-binding site:Magnesium	4	2.73973	0.0574103	POLK, MAT2A, ILVBL, ATP8A1	145	116	19113	4.5453	1	0.999999	56.868
SP_PIR_KEYWORDS	magnesium	7	4.79452	0.115041	POLK, MAT2A, MUS81, ITGA11, ILVBL, TSSK2, ATP8A1	145	442	19235	2.10087	1	0.963606	79.4356
Annotation Cluster 4	Enrichment Score: 1.0651949548502748
Category	Term	Count	%	PValue	Genes	List Total	Pop Hits	Pop Total	Fold Enrichment	Bonferroni	Benjamini	FDR
GOTERM_BP_FAT	GO:0006396~RNA processing	13	8.90411	0.000759473	PABPN1, RPL36A, EXOSC7, RBM5, SNW1, SF3B4, SLBP, PPP2CA, NOP56, TGS1, POP7, ADAR, KIAA1429	102	547	13528	3.15202	0.488736	0.488736	1.17441
GOTERM_CC_FAT	GO:0005730~nucleolus	13	8.90411	0.00953004	STON2, PABPN1, RPL36A, EXOSC7, RBM5, SNW1, NR3C1, AEN, IPO5, MUS81, NOP56, POP7, ADAR	103	698	12782	2.31126	0.797932	0.797932	10.9944
GOTERM_CC_FAT	GO:0031981~nuclear lumen	17	11.6438	0.111929	STON2, PABPN1, RPL36A, EXOSC7, RELA, RBM5, AKAP8L, SNW1, NR3C1, ORC1L, AEN, IPO5, MUS81, NOP56, TGS1, POP7, ADAR	103	1450	12782	1.45493	1	0.992958	76.3973
SP_PIR_KEYWORDS	nucleus	38	26.0274	0.185166	GTF3A, RPL36A, WRNIP1, RBM5, NR3C1, CCNG1, NAP1L4, SF3B4, WDYHV1, DPY30, AEN, PPP2CA, THYN1, MUS81, ZNF408, TGS1, RHOXF1, PABPN1, POLK, EGR2, EXOSC7, RELA, TOR1AIP1, AKAP8L, SECISBP2, SNW1, ORC1L, RSBN1, SLBP, DCP1B, IPO5, BRE, NOP56, THOC5, ZNF414, POP7, KIAA1429, ADAR	145	4283	19235	1.17695	1	0.947085	92.9349
GOTERM_CC_FAT	GO:0043228~non-membrane-bounded organelle	25	17.1233	0.241799	STON2, RPL36A, RBM5, NR3C1, VILL, CORO2B, PPP2CA, AEN, MUS81, DYNC1H1, PABPN1, EXOSC7, AKAP8L, SNW1, DYNLT1, SPIRE2, RPS4X, RPS5, ARHGAP26, ORC1L, SPAG5, IPO5, NOP56, POP7, ADAR	103	2596	12782	1.19508	1	0.999903	96.5502
GOTERM_CC_FAT	GO:0043232~intracellular non-membrane-bounded organelle	25	17.1233	0.241799	STON2, RPL36A, RBM5, NR3C1, VILL, CORO2B, PPP2CA, AEN, MUS81, DYNC1H1, PABPN1, EXOSC7, AKAP8L, SNW1, DYNLT1, SPIRE2, RPS4X, RPS5, ARHGAP26, ORC1L, SPAG5, IPO5, NOP56, POP7, ADAR	103	2596	12782	1.19508	1	0.999903	96.5502
GOTERM_CC_FAT	GO:0043233~organelle lumen	18	12.3288	0.279305	STON2, PABPN1, RPL36A, EXOSC7, F13A1, RELA, RBM5, AKAP8L, SNW1, NR3C1, ORC1L, AEN, IPO5, MUS81, NOP56, TGS1, POP7, ADAR	103	1820	12782	1.22733	1	0.99989	98.1387
GOTERM_CC_FAT	GO:0031974~membrane-enclosed lumen	18	12.3288	0.307916	STON2, PABPN1, RPL36A, EXOSC7, F13A1, RELA, RBM5, AKAP8L, SNW1, NR3C1, ORC1L, AEN, IPO5, MUS81, NOP56, TGS1, POP7, ADAR	103	1856	12782	1.20353	1	0.999539	98.8628
GOTERM_CC_FAT	GO:0070013~intracellular organelle lumen	17	11.6438	0.343331	STON2, PABPN1, RPL36A, EXOSC7, RELA, RBM5, AKAP8L, SNW1, NR3C1, ORC1L, AEN, IPO5, MUS81, NOP56, TGS1, POP7, ADAR	103	1779	12782	1.18586	1	0.999109	99.3997
Annotation Cluster 5	Enrichment Score: 0.9653385240608157
Category	Term	Count	%	PValue	Genes	List Total	Pop Hits	Pop Total	Fold Enrichment	Bonferroni	Benjamini	FDR
GOTERM_BP_FAT	GO:0009314~response to radiation	6	4.10959	0.0169733	GJA10, DUSP1, MAT2A, RELA, AEN, BRE	102	200	13528	3.97882	1	0.746956	23.3702
GOTERM_BP_FAT	GO:0051591~response to cAMP	3	2.05479	0.0391614	DUSP1, MAT2A, RELA	102	42	13528	9.47339	1	0.919511	46.2683
GOTERM_BP_FAT	GO:0009628~response to abiotic stimulus	7	4.79452	0.0573317	GJA10, DUSP1, MAT2A, RELA, AEN, BRE, HVCN1	102	368	13528	2.5228	1	0.935677	60.0694
GOTERM_BP_FAT	GO:0009416~response to light stimulus	4	2.73973	0.0843193	GJA10, DUSP1, MAT2A, RELA	102	138	13528	3.84427	1	0.970856	74.5811
GOTERM_BP_FAT	GO:0010033~response to organic substance	8	5.47945	0.292583	EGR2, DUSP1, MAT2A, RELA, PPP2CA, VKORC1, CSNK2B, NR3C1	102	721	13528	1.47159	1	0.994374	99.5402
GOTERM_BP_FAT	GO:0009719~response to endogenous stimulus	5	3.42466	0.358142	EGR2, DUSP1, MAT2A, RELA, VKORC1	102	405	13528	1.63738	1	0.996566	99.8986
GOTERM_BP_FAT	GO:0009725~response to hormone stimulus	4	2.73973	0.519252	EGR2, DUSP1, MAT2A, RELA	102	367	13528	1.44553	1	0.998972	99.9989
Annotation Cluster 6	Enrichment Score: 0.8661911295578151
Category	Term	Count	%	PValue	Genes	List Total	Pop Hits	Pop Total	Fold Enrichment	Bonferroni	Benjamini	FDR
SP_PIR_KEYWORDS	DNA damage	6	4.10959	0.0191514	POLK, AEN, WRNIP1, MUS81, BRE, CUL4B	145	205	19235	3.88259	0.991069	0.544509	22.1393
GOTERM_BP_FAT	GO:0006974~response to DNA damage stimulus	6	4.10959	0.146591	POLK, AEN, WRNIP1, MUS81, BRE, CUL4B	102	373	13528	2.13342	1	0.989058	91.4972
GOTERM_BP_FAT	GO:0006281~DNA repair	5	3.42466	0.162776	POLK, WRNIP1, MUS81, BRE, CUL4B	102	284	13528	2.33499	1	0.987192	93.6866
SP_PIR_KEYWORDS	dna repair	4	2.73973	0.171631	POLK, MUS81, BRE, CUL4B	145	191	19235	2.77812	1	0.953251	91.256
GOTERM_BP_FAT	GO:0033554~cellular response to stress	7	4.79452	0.247791	POLK, AEN, WRNIP1, MUS81, BRE, ROMO1, CUL4B	102	566	13528	1.64027	1	0.989656	98.8055
GOTERM_BP_FAT	GO:0006259~DNA metabolic process	6	4.10959	0.326795	POLK, WRNIP1, MUS81, BRE, CUL4B, ORC1L	102	506	13528	1.57266	1	0.995744	99.7873
Annotation Cluster 7	Enrichment Score: 0.8298999931507131
Category	Term	Count	%	PValue	Genes	List Total	Pop Hits	Pop Total	Fold Enrichment	Bonferroni	Benjamini	FDR
GOTERM_BP_FAT	GO:0031293~membrane protein intracellular domain proteolysis	3	2.05479	0.00290518	APH1A, RELA, PSENEN	102	11	13528	36.1711	0.923388	0.473894	4.42305
GOTERM_BP_FAT	GO:0033619~membrane protein proteolysis	3	2.05479	0.00960694	APH1A, RELA, PSENEN	102	20	13528	19.8941	0.999801	0.704092	13.9379
GOTERM_BP_FAT	GO:0006508~proteolysis	14	9.58904	0.0496329	OSGEP, APH1A, RELA, RCE1, AFG3L2, CAPN1, MARCH2, APEH, PSME1, UBA1, DPP8, PSENEN, USP35, CUL4B	102	1054	13528	1.76165	1	0.928936	54.686
GOTERM_BP_FAT	GO:0009057~macromolecule catabolic process	11	7.53425	0.066131	MARCH2, APH1A, PSME1, UBA1, EXOSC7, DCP1B, RELA, PSENEN, USP35, CUL4B, AFG3L2	102	781	13528	1.86799	1	0.951233	65.4876
GOTERM_BP_FAT	GO:0044265~cellular macromolecule catabolic process	10	6.84932	0.0917759	MARCH2, APH1A, PSME1, UBA1, EXOSC7, DCP1B, RELA, PSENEN, USP35, CUL4B	102	725	13528	1.82934	1	0.966628	77.6158
GOTERM_BP_FAT	GO:0030163~protein catabolic process	9	6.16438	0.0931681	MARCH2, APH1A, PSME1, UBA1, RELA, PSENEN, USP35, CUL4B, AFG3L2	102	622	13528	1.91905	1	0.959171	78.1434
GOTERM_BP_FAT	GO:0051603~proteolysis involved in cellular protein catabolic process	8	5.47945	0.161148	MARCH2, APH1A, PSME1, UBA1, RELA, PSENEN, USP35, CUL4B	102	600	13528	1.76837	1	0.988123	93.493
GOTERM_BP_FAT	GO:0044257~cellular protein catabolic process	8	5.47945	0.164022	MARCH2, APH1A, PSME1, UBA1, RELA, PSENEN, USP35, CUL4B	102	603	13528	1.75957	1	0.984438	93.8311
GOTERM_BP_FAT	GO:0006511~ubiquitin-dependent protein catabolic process	3	2.05479	0.542221	PSME1, USP35, CUL4B	102	242	13528	1.64414	1	0.999244	99.9995
GOTERM_BP_FAT	GO:0019941~modification-dependent protein catabolic process	5	3.42466	0.626129	MARCH2, PSME1, UBA1, USP35, CUL4B	102	574	13528	1.15529	1	0.999764	100
GOTERM_BP_FAT	GO:0043632~modification-dependent macromolecule catabolic process	5	3.42466	0.626129	MARCH2, PSME1, UBA1, USP35, CUL4B	102	574	13528	1.15529	1	0.999764	100
SP_PIR_KEYWORDS	ubl conjugation pathway	4	2.73973	0.737785	MARCH2, UBA1, USP35, CUL4B	145	509	19235	1.04248	1	0.997364	100
GOTERM_BP_FAT	GO:0044093~positive regulation of molecular function	4	2.73973	0.819225	APH1A, PSME1, RELA, PSENEN	102	586	13528	0.905307	1	0.999998	100
GOTERM_BP_FAT	GO:0043085~positive regulation of catalytic activity	3	2.05479	0.904707	APH1A, PSME1, PSENEN	102	520	13528	0.765158	1	1	100
Annotation Cluster 8	Enrichment Score: 0.7850794671966463
Category	Term	Count	%	PValue	Genes	List Total	Pop Hits	Pop Total	Fold Enrichment	Bonferroni	Benjamini	FDR
GOTERM_BP_FAT	GO:0006508~proteolysis	14	9.58904	0.0496329	OSGEP, APH1A, RELA, RCE1, AFG3L2, CAPN1, MARCH2, APEH, PSME1, UBA1, DPP8, PSENEN, USP35, CUL4B	102	1054	13528	1.76165	1	0.928936	54.686
GOTERM_MF_FAT	GO:0070011~peptidase activity, acting on L-amino acid peptides	8	5.47945	0.107164	APEH, OSGEP, PSENEN, DPP8, RCE1, USP35, AFG3L2, CAPN1	96	549	12983	1.9707	1	0.999511	77.4517
GOTERM_MF_FAT	GO:0008233~peptidase activity	8	5.47945	0.127078	APEH, OSGEP, PSENEN, DPP8, RCE1, USP35, AFG3L2, CAPN1	96	574	12983	1.88487	1	0.997742	83.2358
GOTERM_MF_FAT	GO:0004175~endopeptidase activity	6	4.10959	0.140163	APEH, OSGEP, PSENEN, RCE1, AFG3L2, CAPN1	96	375	12983	2.16383	1	0.996982	86.2535
GOTERM_MF_FAT	GO:0004222~metalloendopeptidase activity	3	2.05479	0.17659	OSGEP, RCE1, AFG3L2	96	104	12983	3.90114	1	0.998546	92.217
GOTERM_MF_FAT	GO:0008237~metallopeptidase activity	3	2.05479	0.388215	OSGEP, RCE1, AFG3L2	96	183	12983	2.21704	1	0.999742	99.843
SP_PIR_KEYWORDS	Protease	5	3.42466	0.491908	OSGEP, DPP8, USP35, AFG3L2, CAPN1	145	484	19235	1.3704	1	0.983921	99.9843
Annotation Cluster 9	Enrichment Score: 0.7103081975706268
Category	Term	Count	%	PValue	Genes	List Total	Pop Hits	Pop Total	Fold Enrichment	Bonferroni	Benjamini	FDR
GOTERM_BP_FAT	GO:0000302~response to reactive oxygen species	3	2.05479	0.107967	DUSP1, RELA, ROMO1	102	75	13528	5.3051	1	0.969155	83.0773
GOTERM_BP_FAT	GO:0010035~response to inorganic substance	4	2.73973	0.197472	DUSP1, RELA, ROMO1, HVCN1	102	205	13528	2.58785	1	0.985343	96.7307
GOTERM_BP_FAT	GO:0006979~response to oxidative stress	3	2.05479	0.346959	DUSP1, RELA, ROMO1	102	164	13528	2.42611	1	0.99636	99.8674
Annotation Cluster 10	Enrichment Score: 0.6479682049993493
Category	Term	Count	%	PValue	Genes	List Total	Pop Hits	Pop Total	Fold Enrichment	Bonferroni	Benjamini	FDR
GOTERM_BP_FAT	GO:0032535~regulation of cellular component size	5	3.42466	0.144599	RTN4, SEMA3F, PPP2CA, CCNG1, VILL	102	271	13528	2.447	1	0.989918	91.1834
GOTERM_BP_FAT	GO:0030308~negative regulation of cell growth	3	2.05479	0.150465	RTN4, SEMA3F, PPP2CA	102	92	13528	4.32481	1	0.987263	92.0779
GOTERM_BP_FAT	GO:0045792~negative regulation of cell size	3	2.05479	0.168817	RTN4, SEMA3F, PPP2CA	102	99	13528	4.01901	1	0.983123	94.3589
GOTERM_BP_FAT	GO:0045926~negative regulation of growth	3	2.05479	0.198347	RTN4, SEMA3F, PPP2CA	102	110	13528	3.61711	1	0.98429	96.7857
GOTERM_BP_FAT	GO:0008361~regulation of cell size	4	2.73973	0.19938	RTN4, SEMA3F, PPP2CA, CCNG1	102	206	13528	2.57529	1	0.983272	96.8496
GOTERM_BP_FAT	GO:0001558~regulation of cell growth	3	2.05479	0.426418	RTN4, SEMA3F, PPP2CA	102	194	13528	2.05094	1	0.99815	99.9824
GOTERM_BP_FAT	GO:0040008~regulation of growth	4	2.73973	0.470179	RTN4, SEMA3F, PPP2CA, AFG3L2	102	341	13528	1.55575	1	0.998638	99.9949
Annotation Cluster 11	Enrichment Score: 0.5737251214005543
Category	Term	Count	%	PValue	Genes	List Total	Pop Hits	Pop Total	Fold Enrichment	Bonferroni	Benjamini	FDR
GOTERM_BP_FAT	GO:0016485~protein processing	3	2.05479	0.203785	APH1A, PSENEN, CAPN1	102	112	13528	3.55252	1	0.983536	97.1086
GOTERM_BP_FAT	GO:0051604~protein maturation	3	2.05479	0.231202	APH1A, PSENEN, CAPN1	102	122	13528	3.26133	1	0.988492	98.3232
KEGG_PATHWAY	hsa05010:Alzheimer's disease	3	2.05479	0.403329	APH1A, PSENEN, CAPN1	44	163	5085	2.12702	1	0.999742	99.4732
Annotation Cluster 12	Enrichment Score: 0.572539197708434
Category	Term	Count	%	PValue	Genes	List Total	Pop Hits	Pop Total	Fold Enrichment	Bonferroni	Benjamini	FDR
SP_PIR_KEYWORDS	dna replication	3	2.05479	0.140903	POLK, WRNIP1, ORC1L	145	88	19235	4.52234	1	0.975417	85.9905
GOTERM_BP_FAT	GO:0006259~DNA metabolic process	6	4.10959	0.326795	POLK, WRNIP1, MUS81, BRE, CUL4B, ORC1L	102	506	13528	1.57266	1	0.995744	99.7873
GOTERM_BP_FAT	GO:0006260~DNA replication	3	2.05479	0.41609	POLK, WRNIP1, ORC1L	102	190	13528	2.09412	1	0.998371	99.9767
Annotation Cluster 13	Enrichment Score: 0.560533122602166
Category	Term	Count	%	PValue	Genes	List Total	Pop Hits	Pop Total	Fold Enrichment	Bonferroni	Benjamini	FDR
GOTERM_BP_FAT	GO:0046907~intracellular transport	10	6.84932	0.0566655	STARD3, PABPN1, STON2, MTX1, IPO5, YWHAQ, LGTN, THOC5, COG1, SEC61G	102	657	13528	2.01868	1	0.942824	59.6284
GOTERM_BP_FAT	GO:0006886~intracellular protein transport	6	4.10959	0.14775	STON2, MTX1, IPO5, YWHAQ, LGTN, SEC61G	102	374	13528	2.12771	1	0.987864	91.675
GOTERM_BP_FAT	GO:0034613~cellular protein localization	6	4.10959	0.193254	STON2, MTX1, IPO5, YWHAQ, LGTN, SEC61G	102	411	13528	1.93617	1	0.986561	96.4531
GOTERM_BP_FAT	GO:0070727~cellular macromolecule localization	6	4.10959	0.197148	STON2, MTX1, IPO5, YWHAQ, LGTN, SEC61G	102	414	13528	1.92214	1	0.98655	96.7102
GOTERM_BP_FAT	GO:0006605~protein targeting	4	2.73973	0.216752	MTX1, IPO5, YWHAQ, SEC61G	102	215	13528	2.46749	1	0.985446	97.7601
GOTERM_BP_FAT	GO:0033365~protein localization in organelle	3	2.05479	0.297605	MTX1, IPO5, SEC61G	102	146	13528	2.72522	1	0.994477	99.5884
GOTERM_BP_FAT	GO:0015031~protein transport	7	4.79452	0.506951	STON2, MTX1, IPO5, YWHAQ, LGTN, COG1, SEC61G	102	762	13528	1.21836	1	0.998953	99.9983
GOTERM_BP_FAT	GO:0045184~establishment of protein localization	7	4.79452	0.516001	STON2, MTX1, IPO5, YWHAQ, LGTN, COG1, SEC61G	102	769	13528	1.20727	1	0.998982	99.9987
GOTERM_BP_FAT	GO:0008104~protein localization	7	4.79452	0.651671	STON2, MTX1, IPO5, YWHAQ, LGTN, COG1, SEC61G	102	882	13528	1.0526	1	0.999859	100
SP_PIR_KEYWORDS	protein transport	4	2.73973	0.70738	MTX1, IPO5, COG1, SEC61G	145	485	19235	1.09406	1	0.996123	100
Annotation Cluster 14	Enrichment Score: 0.5527286125340788
Category	Term	Count	%	PValue	Genes	List Total	Pop Hits	Pop Total	Fold Enrichment	Bonferroni	Benjamini	FDR
GOTERM_BP_FAT	GO:0006412~translation	6	4.10959	0.101753	RPL36A, SECISBP2, FARSB, LGTN, RPS4X, RPS5	102	331	13528	2.40412	1	0.966092	81.1485
KEGG_PATHWAY	hsa03010:Ribosome	3	2.05479	0.167056	RPL36A, RPS4X, RPS5	44	87	5085	3.98511	0.999992	0.997118	84.3853
GOTERM_BP_FAT	GO:0006414~translational elongation	3	2.05479	0.17413	RPL36A, RPS4X, RPS5	102	101	13528	3.93943	1	0.982087	94.8943
SP_PIR_KEYWORDS	ribonucleoprotein	4	2.73973	0.347561	RPL36A, RPS4X, RPS5, SLBP	145	279	19235	1.90187	1	0.972484	99.602
GOTERM_MF_FAT	GO:0003735~structural constituent of ribosome	3	2.05479	0.348757	RPL36A, RPS4X, RPS5	96	168	12983	2.41499	1	0.999543	99.6432
SP_PIR_KEYWORDS	ribosomal protein	3	2.05479	0.41237	RPL36A, RPS4X, RPS5	145	188	19235	2.11684	1	0.984773	99.8972
GOTERM_MF_FAT	GO:0005198~structural molecule activity	6	4.10959	0.497486	SH3RF1, RPL36A, CLDN20, RPS4X, RPS5, VILL	96	634	12983	1.27987	1	0.999904	99.9882
GOTERM_CC_FAT	GO:0005840~ribosome	3	2.05479	0.514358	RPL36A, RPS4X, RPS5	103	215	12782	1.73159	1	0.999171	99.9847
Annotation Cluster 15	Enrichment Score: 0.4823519574746346
Category	Term	Count	%	PValue	Genes	List Total	Pop Hits	Pop Total	Fold Enrichment	Bonferroni	Benjamini	FDR
INTERPRO	IPR013783:Immunoglobulin-like fold	7	4.79452	0.252265	RELA, SEMA3F, F13A1, SIRPB2, PIGR, FCAMR, MOG	129	553	16659	1.63468	1	1	97.988
SP_PIR_KEYWORDS	Immunoglobulin domain	6	4.10959	0.276559	SEMA3F, SIRPB2, SLAMF8, PIGR, FCAMR, MOG	145	470	19235	1.69347	1	0.972416	98.4847
INTERPRO	IPR013106:Immunoglobulin V-set	4	2.73973	0.299554	SIRPB2, PIGR, FCAMR, MOG	129	249	16659	2.07453	1	1	99.1636
INTERPRO	IPR007110:Immunoglobulin-like	6	4.10959	0.341173	SEMA3F, SIRPB2, SLAMF8, PIGR, FCAMR, MOG	129	501	16659	1.54658	1	1	99.6328
SMART	SM00409:IG	4	2.73973	0.38312	SEMA3F, SIRPB2, PIGR, FCAMR	62	330	9079	1.77498	1	0.999976	99.284
INTERPRO	IPR003599:Immunoglobulin subtype	4	2.73973	0.467152	SEMA3F, SIRPB2, PIGR, FCAMR	129	330	16659	1.56533	1	1	99.9788
Annotation Cluster 16	Enrichment Score: 0.474992551158723
Category	Term	Count	%	PValue	Genes	List Total	Pop Hits	Pop Total	Fold Enrichment	Bonferroni	Benjamini	FDR
GOTERM_BP_FAT	GO:0009100~glycoprotein metabolic process	4	2.73973	0.191774	APH1A, CHST7, PSENEN, ALG12	102	202	13528	2.62629	1	0.987376	96.3506
SP_PIR_KEYWORDS	golgi apparatus	7	4.79452	0.278423	DPY30, SH3RF1, APH1A, CHST7, PITPNB, PSENEN, COG1	145	588	19235	1.57923	1	0.968626	98.5345
GOTERM_CC_FAT	GO:0005794~Golgi apparatus	7	4.79452	0.703927	SH3RF1, APH1A, CHST7, PITPNB, PSENEN, DYNC1H1, COG1	103	872	12782	0.996192	1	0.999855	100
Annotation Cluster 17	Enrichment Score: 0.45147980437645435
Category	Term	Count	%	PValue	Genes	List Total	Pop Hits	Pop Total	Fold Enrichment	Bonferroni	Benjamini	FDR
UP_SEQ_FEATURE	transmembrane region	44	30.137	0.146464	RTN4, GJA10, TNFRSF21, GPR128, APH1A, SLC44A4, MTX1, ANO1, ITGA11, ROMO1, SIRPB2, TMEM42, RCE1, HVCN1, MOG, STARD3, DAGLA, VKORC1, ILVBL, SLC4A2, PSENEN, TMEM14C, TM9SF1, LMAN1L, TMEM93, TOR1AIP1, SLAMF8, SLC22A20, CLDN20, PIGR, KRTCAP2, AFG3L2, FCAMR, TMEM55B, MARCH2, ST7L, LETM1, CHST7, KCNN2, C19ORF18, IL5RA, ALG12, SEC61G, ATP8A1	145	4911	19113	1.18098	1	1	89.4855
SP_PIR_KEYWORDS	transmembrane	44	30.137	0.156955	RTN4, GJA10, TNFRSF21, GPR128, APH1A, SLC44A4, MTX1, ANO1, ITGA11, ROMO1, SIRPB2, TMEM42, RCE1, HVCN1, MOG, STARD3, DAGLA, VKORC1, ILVBL, SLC4A2, PSENEN, TMEM14C, TM9SF1, LMAN1L, TMEM93, TOR1AIP1, SLAMF8, SLC22A20, CLDN20, PIGR, KRTCAP2, AFG3L2, FCAMR, TMEM55B, MARCH2, ST7L, LETM1, CHST7, KCNN2, C19ORF18, IL5RA, ALG12, SEC61G, ATP8A1	145	4973	19235	1.1737	1	0.959423	89.0247
GOTERM_CC_FAT	GO:0016021~integral to membrane	45	30.8219	0.399987	RTN4, GJA10, TNFRSF21, GPR128, APH1A, SLC44A4, MTX1, ANO1, ITGA11, ROMO1, SIRPB2, TMEM42, RCE1, HVCN1, MOG, STARD3, DAGLA, VKORC1, ILVBL, SLC4A2, PSENEN, TMEM14C, TM9SF1, LMAN1L, TMEM93, TOR1AIP1, SLAMF8, SLC22A20, CLDN20, PIGR, KRTCAP2, AFG3L2, FCAMR, TMEM55B, MARCH2, ST7L, LETM1, CHST7, KCNN2, IPO5, C19ORF18, IL5RA, ALG12, SEC61G, ATP8A1	103	5297	12782	1.05425	1	0.998587	99.7997
UP_SEQ_FEATURE	topological domain:Extracellular	22	15.0685	0.487308	GJA10, GPR128, TNFRSF21, LMAN1L, SLC44A4, ANO1, ITGA11, SIRPB2, SLC22A20, SLAMF8, CLDN20, PIGR, HVCN1, FCAMR, MOG, STARD3, DAGLA, SLC4A2, C19ORF18, IL5RA, SEC61G, ATP8A1	145	2719	19113	1.06653	1	1	99.9925
SP_PIR_KEYWORDS	membrane	48	32.8767	0.519725	RTN4, GJA10, STON2, TNFRSF21, GPR128, APH1A, SLC44A4, MTX1, ANO1, ITGA11, ROMO1, SIRPB2, TMEM42, RCE1, HVCN1, MOG, STARD3, DAGLA, VKORC1, ILVBL, SLC4A2, PSENEN, TMEM14C, TM9SF1, LMAN1L, TMEM93, TOR1AIP1, SLAMF8, SLC22A20, CLDN20, PIGR, KRTCAP2, AFG3L2, FCAMR, TMEM55B, CAPN1, MARCH2, ST7L, LETM1, CHST7, KCNN2, C19ORF18, LGTN, IL5RA, ALG12, COG1, SEC61G, ATP8A1	145	6256	19235	1.01781	1	0.984417	99.9924
GOTERM_CC_FAT	GO:0031224~intrinsic to membrane	45	30.8219	0.519754	RTN4, GJA10, TNFRSF21, GPR128, APH1A, SLC44A4, MTX1, ANO1, ITGA11, ROMO1, SIRPB2, TMEM42, RCE1, HVCN1, MOG, STARD3, DAGLA, VKORC1, ILVBL, SLC4A2, PSENEN, TMEM14C, TM9SF1, LMAN1L, TMEM93, TOR1AIP1, SLAMF8, SLC22A20, CLDN20, PIGR, KRTCAP2, AFG3L2, FCAMR, TMEM55B, MARCH2, ST7L, LETM1, CHST7, KCNN2, IPO5, C19ORF18, IL5RA, ALG12, SEC61G, ATP8A1	103	5485	12782	1.01812	1	0.998892	99.9866
UP_SEQ_FEATURE	topological domain:Cytoplasmic	26	17.8082	0.571104	GJA10, RTN4, GPR128, TNFRSF21, SLC44A4, ANO1, ITGA11, SIRPB2, HVCN1, MOG, STARD3, DAGLA, VKORC1, PSENEN, SLC4A2, LMAN1L, SLAMF8, SLC22A20, CLDN20, PIGR, FCAMR, CHST7, C19ORF18, IL5RA, SEC61G, ATP8A1	145	3374	19113	1.01576	1	1	99.9994
Annotation Cluster 18	Enrichment Score: 0.4390626102414504
Category	Term	Count	%	PValue	Genes	List Total	Pop Hits	Pop Total	Fold Enrichment	Bonferroni	Benjamini	FDR
GOTERM_BP_FAT	GO:0007584~response to nutrient	3	2.05479	0.281009	DUSP1, RELA, CSNK2B	102	140	13528	2.84202	1	0.993968	99.4082
GOTERM_BP_FAT	GO:0010033~response to organic substance	8	5.47945	0.292583	EGR2, DUSP1, MAT2A, RELA, PPP2CA, VKORC1, CSNK2B, NR3C1	102	721	13528	1.47159	1	0.994374	99.5402
GOTERM_BP_FAT	GO:0031667~response to nutrient levels	3	2.05479	0.434103	DUSP1, RELA, CSNK2B	102	197	13528	2.01971	1	0.998134	99.9857
GOTERM_BP_FAT	GO:0009991~response to extracellular stimulus	3	2.05479	0.49112	DUSP1, RELA, CSNK2B	102	220	13528	1.80856	1	0.998947	99.9973
Annotation Cluster 19	Enrichment Score: 0.39035367995595766
Category	Term	Count	%	PValue	Genes	List Total	Pop Hits	Pop Total	Fold Enrichment	Bonferroni	Benjamini	FDR
GOTERM_BP_FAT	GO:0050767~regulation of neurogenesis	3	2.05479	0.352383	RTN4, RELA, SEMA3F	102	166	13528	2.39688	1	0.996453	99.8835
GOTERM_BP_FAT	GO:0051960~regulation of nervous system development	3	2.05479	0.421266	RTN4, RELA, SEMA3F	102	192	13528	2.0723	1	0.998402	99.9797
GOTERM_BP_FAT	GO:0060284~regulation of cell development	3	2.05479	0.454326	RTN4, RELA, SEMA3F	102	205	13528	1.94089	1	0.99841	99.9919
Annotation Cluster 20	Enrichment Score: 0.37375432033174744
Category	Term	Count	%	PValue	Genes	List Total	Pop Hits	Pop Total	Fold Enrichment	Bonferroni	Benjamini	FDR
GOTERM_BP_FAT	GO:0009165~nucleotide biosynthetic process	3	2.05479	0.405672	DCTD, NADSYN1, ATP8A1	102	186	13528	2.13915	1	0.998452	99.9694
GOTERM_BP_FAT	GO:0034654~nucleobase, nucleoside, nucleotide and nucleic acid biosynthetic process	3	2.05479	0.423845	DCTD, NADSYN1, ATP8A1	102	193	13528	2.06157	1	0.998349	99.9811
GOTERM_BP_FAT	GO:0034404~nucleobase, nucleoside and nucleotide biosynthetic process	3	2.05479	0.423845	DCTD, NADSYN1, ATP8A1	102	193	13528	2.06157	1	0.998349	99.9811
GOTERM_BP_FAT	GO:0044271~nitrogen compound biosynthetic process	4	2.73973	0.438928	DCTD, MAT2A, NADSYN1, ATP8A1	102	325	13528	1.63234	1	0.998164	99.9875
Annotation Cluster 21	Enrichment Score: 0.3457058311205214
Category	Term	Count	%	PValue	Genes	List Total	Pop Hits	Pop Total	Fold Enrichment	Bonferroni	Benjamini	FDR
SP_PIR_KEYWORDS	protein phosphatase	3	2.05479	0.254309	DUSP28, DUSP1, PPP2CA	145	130	19235	3.06127	1	0.966944	97.7574
GOTERM_BP_FAT	GO:0006470~protein amino acid dephosphorylation	3	2.05479	0.261617	DUSP28, DUSP1, PPP2CA	102	133	13528	2.9916	1	0.991623	99.1048
GOTERM_BP_FAT	GO:0016311~dephosphorylation	3	2.05479	0.319643	DUSP28, DUSP1, PPP2CA	102	154	13528	2.58365	1	0.995852	99.7493
GOTERM_MF_FAT	GO:0004721~phosphoprotein phosphatase activity	3	2.05479	0.340762	DUSP28, DUSP1, PPP2CA	96	165	12983	2.4589	1	0.999667	99.5811
GOTERM_MF_FAT	GO:0016791~phosphatase activity	3	2.05479	0.546899	DUSP28, DUSP1, PPP2CA	96	249	12983	1.62939	1	0.999905	99.997
GOTERM_BP_FAT	GO:0006793~phosphorus metabolic process	4	2.73973	0.979498	DUSP28, DUSP1, PPP2CA, TSSK2	102	973	13528	0.545231	1	1	100
GOTERM_BP_FAT	GO:0006796~phosphate metabolic process	4	2.73973	0.979498	DUSP28, DUSP1, PPP2CA, TSSK2	102	973	13528	0.545231	1	1	100
Annotation Cluster 22	Enrichment Score: 0.33220961826891826
Category	Term	Count	%	PValue	Genes	List Total	Pop Hits	Pop Total	Fold Enrichment	Bonferroni	Benjamini	FDR
SP_PIR_KEYWORDS	lysosome	3	2.05479	0.306945	TM9SF1, MARCH2, TMEM55B	145	149	19235	2.67091	1	0.963608	99.1304
GOTERM_CC_FAT	GO:0005764~lysosome	3	2.05479	0.504321	TM9SF1, MARCH2, TMEM55B	103	211	12782	1.76441	1	0.999341	99.9804
GOTERM_CC_FAT	GO:0000323~lytic vacuole	3	2.05479	0.504321	TM9SF1, MARCH2, TMEM55B	103	211	12782	1.76441	1	0.999341	99.9804
GOTERM_CC_FAT	GO:0005773~vacuole	3	2.05479	0.60074	TM9SF1, MARCH2, TMEM55B	103	252	12782	1.47735	1	0.999532	99.9986
Annotation Cluster 23	Enrichment Score: 0.3314590824538897
Category	Term	Count	%	PValue	Genes	List Total	Pop Hits	Pop Total	Fold Enrichment	Bonferroni	Benjamini	FDR
GOTERM_BP_FAT	GO:0042330~taxis	3	2.05479	0.33607	SEMA3F, SERPIND1, LECT2	102	160	13528	2.48676	1	0.995829	99.8285
GOTERM_BP_FAT	GO:0006935~chemotaxis	3	2.05479	0.33607	SEMA3F, SERPIND1, LECT2	102	160	13528	2.48676	1	0.995829	99.8285
GOTERM_BP_FAT	GO:0007626~locomotory behavior	3	2.05479	0.610074	SEMA3F, SERPIND1, LECT2	102	274	13528	1.45213	1	0.999734	100
GOTERM_BP_FAT	GO:0007610~behavior	4	2.73973	0.685364	EGR2, SEMA3F, SERPIND1, LECT2	102	469	13528	1.13115	1	0.999928	100
Annotation Cluster 24	Enrichment Score: 0.31986607439937514
Category	Term	Count	%	PValue	Genes	List Total	Pop Hits	Pop Total	Fold Enrichment	Bonferroni	Benjamini	FDR
GOTERM_BP_FAT	GO:0000278~mitotic cell cycle	5	3.42466	0.298738	PSME1, SPAG5, DYNC1H1, CCNG1, FGF4	102	370	13528	1.79226	1	0.994124	99.5986
SP_PIR_KEYWORDS	mitosis	3	2.05479	0.395484	SPAG5, DYNC1H1, CCNG1	145	183	19235	2.17467	1	0.983323	99.8517
GOTERM_BP_FAT	GO:0000279~M phase	4	2.73973	0.446807	SPAG5, DYNC1H1, CCNG1, FGF4	102	329	13528	1.61249	1	0.998297	99.99
GOTERM_BP_FAT	GO:0000280~nuclear division	3	2.05479	0.49112	SPAG5, CCNG1, FGF4	102	220	13528	1.80856	1	0.998947	99.9973
GOTERM_BP_FAT	GO:0007067~mitosis	3	2.05479	0.49112	SPAG5, CCNG1, FGF4	102	220	13528	1.80856	1	0.998947	99.9973
GOTERM_BP_FAT	GO:0000087~M phase of mitotic cell cycle	3	2.05479	0.500671	SPAG5, CCNG1, FGF4	102	224	13528	1.77626	1	0.998901	99.998
GOTERM_BP_FAT	GO:0048285~organelle fission	3	2.05479	0.51245	SPAG5, CCNG1, FGF4	102	229	13528	1.73748	1	0.998987	99.9986
GOTERM_BP_FAT	GO:0007049~cell cycle	7	4.79452	0.524991	DUSP1, PSME1, SPAG5, CUL4B, DYNC1H1, CCNG1, FGF4	102	776	13528	1.19638	1	0.999011	99.9991
GOTERM_BP_FAT	GO:0022403~cell cycle phase	4	2.73973	0.601429	SPAG5, DYNC1H1, CCNG1, FGF4	102	414	13528	1.28142	1	0.999703	99.9999
GOTERM_BP_FAT	GO:0022402~cell cycle process	5	3.42466	0.613598	PSME1, SPAG5, DYNC1H1, CCNG1, FGF4	102	565	13528	1.17369	1	0.999734	100
Annotation Cluster 25	Enrichment Score: 0.3054947464773637
Category	Term	Count	%	PValue	Genes	List Total	Pop Hits	Pop Total	Fold Enrichment	Bonferroni	Benjamini	FDR
INTERPRO	IPR003959:ATPase, AAA-type, core	3	2.05479	0.0544981	WRNIP1, AFG3L2, ORC1L	129	49	16659	7.9065	1	1	52.9032
SMART	SM00382:AAA	4	2.73973	0.0723215	WRNIP1, DYNC1H1, AFG3L2, ORC1L	62	144	9079	4.06765	0.992949	0.992949	53.5849
INTERPRO	IPR003593:ATPase, AAA+ type, core	4	2.73973	0.0993881	WRNIP1, DYNC1H1, AFG3L2, ORC1L	129	144	16659	3.58721	1	1	75.5009
UP_SEQ_FEATURE	nucleotide phosphate-binding region:ATP	9	6.16438	0.439205	MAT2A, UBA1, WRNIP1, NADSYN1, TSSK2, DYNC1H1, AFG3L2, ORC1L, ATP8A1	145	962	19113	1.23319	1	1	99.9733
SP_PIR_KEYWORDS	atp-binding	10	6.84932	0.667612	MAT2A, UBA1, WRNIP1, FARSB, NADSYN1, TSSK2, DYNC1H1, AFG3L2, ORC1L, ATP8A1	145	1326	19235	1.00042	1	0.994855	99.9999
GOTERM_MF_FAT	GO:0005524~ATP binding	10	6.84932	0.767275	MAT2A, UBA1, WRNIP1, FARSB, NADSYN1, TSSK2, DYNC1H1, AFG3L2, ORC1L, ATP8A1	96	1477	12983	0.915637	1	0.999993	100
GOTERM_MF_FAT	GO:0032559~adenyl ribonucleotide binding	10	6.84932	0.781094	MAT2A, UBA1, WRNIP1, FARSB, NADSYN1, TSSK2, DYNC1H1, AFG3L2, ORC1L, ATP8A1	96	1497	12983	0.903404	1	0.999992	100
GOTERM_MF_FAT	GO:0030554~adenyl nucleotide binding	10	6.84932	0.830583	MAT2A, UBA1, WRNIP1, FARSB, NADSYN1, TSSK2, DYNC1H1, AFG3L2, ORC1L, ATP8A1	96	1577	12983	0.857575	1	0.999997	100
GOTERM_MF_FAT	GO:0001883~purine nucleoside binding	10	6.84932	0.843665	MAT2A, UBA1, WRNIP1, FARSB, NADSYN1, TSSK2, DYNC1H1, AFG3L2, ORC1L, ATP8A1	96	1601	12983	0.844719	1	0.999997	100
GOTERM_MF_FAT	GO:0001882~nucleoside binding	10	6.84932	0.849398	MAT2A, UBA1, WRNIP1, FARSB, NADSYN1, TSSK2, DYNC1H1, AFG3L2, ORC1L, ATP8A1	96	1612	12983	0.838955	1	0.999997	100
GOTERM_MF_FAT	GO:0000166~nucleotide binding	14	9.58904	0.858906	PABPN1, RPL36A, MAT2A, WRNIP1, NADSYN1, RBM5, AFG3L2, SF3B4, ORC1L, UBA1, FARSB, TSSK2, DYNC1H1, ATP8A1	96	2245	12983	0.843365	1	0.999997	100
SP_PIR_KEYWORDS	nucleotide-binding	10	6.84932	0.893473	MAT2A, UBA1, WRNIP1, FARSB, NADSYN1, TSSK2, DYNC1H1, AFG3L2, ORC1L, ATP8A1	145	1686	19235	0.786804	1	0.999851	100
GOTERM_MF_FAT	GO:0032555~purine ribonucleotide binding	10	6.84932	0.934298	MAT2A, UBA1, WRNIP1, FARSB, NADSYN1, TSSK2, DYNC1H1, AFG3L2, ORC1L, ATP8A1	96	1836	12983	0.736599	1	1	100
GOTERM_MF_FAT	GO:0032553~ribonucleotide binding	10	6.84932	0.934298	MAT2A, UBA1, WRNIP1, FARSB, NADSYN1, TSSK2, DYNC1H1, AFG3L2, ORC1L, ATP8A1	96	1836	12983	0.736599	1	1	100
GOTERM_MF_FAT	GO:0017076~purine nucleotide binding	10	6.84932	0.952988	MAT2A, UBA1, WRNIP1, FARSB, NADSYN1, TSSK2, DYNC1H1, AFG3L2, ORC1L, ATP8A1	96	1918	12983	0.705107	1	1	100
Annotation Cluster 26	Enrichment Score: 0.27455033909027216
Category	Term	Count	%	PValue	Genes	List Total	Pop Hits	Pop Total	Fold Enrichment	Bonferroni	Benjamini	FDR
GOTERM_CC_FAT	GO:0005789~endoplasmic reticulum membrane	4	2.73973	0.363487	RTN4, KRTCAP2, ALG12, SEC61G	103	269	12782	1.84531	1	0.998949	99.5892
GOTERM_CC_FAT	GO:0042175~nuclear envelope-endoplasmic reticulum network	4	2.73973	0.396063	RTN4, KRTCAP2, ALG12, SEC61G	103	284	12782	1.74785	1	0.999104	99.7831
GOTERM_CC_FAT	GO:0005783~endoplasmic reticulum	9	6.16438	0.50286	RTN4, MARCH2, APH1A, VKORC1, PSENEN, RCE1, KRTCAP2, ALG12, SEC61G	103	960	12782	1.16341	1	0.999582	99.9797
GOTERM_CC_FAT	GO:0044432~endoplasmic reticulum part	4	2.73973	0.526408	RTN4, KRTCAP2, ALG12, SEC61G	103	347	12782	1.43051	1	0.998597	99.9887
GOTERM_CC_FAT	GO:0012505~endomembrane system	6	4.10959	0.755613	RTN4, CHST7, IPO5, KRTCAP2, ALG12, SEC61G	103	782	12782	0.952152	1	0.999608	100
GOTERM_CC_FAT	GO:0031090~organelle membrane	8	5.47945	0.782305	RTN4, LETM1, CHST7, MTX1, KRTCAP2, AFG3L2, ALG12, SEC61G	103	1096	12782	0.905818	1	0.999729	100
Annotation Cluster 27	Enrichment Score: 0.1988628138381818
Category	Term	Count	%	PValue	Genes	List Total	Pop Hits	Pop Total	Fold Enrichment	Bonferroni	Benjamini	FDR
GOTERM_BP_FAT	GO:0007010~cytoskeleton organization	5	3.42466	0.410844	CORO2B, SPAG5, DYNC1H1, ARHGAP26, VILL	102	436	13528	1.52096	1	0.998338	99.9733
SP_PIR_KEYWORDS	cytoskeleton	5	3.42466	0.705428	CORO2B, SPAG5, PPP2CA, SPIRE2, ARHGAP26	145	636	19235	1.04289	1	0.9964	100
GOTERM_CC_FAT	GO:0005856~cytoskeleton	9	6.16438	0.873539	CORO2B, RPL36A, SPAG5, PPP2CA, DYNLT1, SPIRE2, DYNC1H1, ARHGAP26, VILL	103	1381	12782	0.808743	1	0.999822	100
Annotation Cluster 28	Enrichment Score: 0.19271366317070882
Category	Term	Count	%	PValue	Genes	List Total	Pop Hits	Pop Total	Fold Enrichment	Bonferroni	Benjamini	FDR
GOTERM_BP_FAT	GO:0034622~cellular macromolecular complex assembly	4	2.73973	0.425045	IPO5, RBM5, TGS1, NAP1L4	102	318	13528	1.66827	1	0.998248	99.9817
GOTERM_BP_FAT	GO:0034621~cellular macromolecular complex subunit organization	4	2.73973	0.500652	IPO5, RBM5, TGS1, NAP1L4	102	357	13528	1.48602	1	0.998982	99.998
GOTERM_BP_FAT	GO:0065003~macromolecular complex assembly	4	2.73973	0.879633	IPO5, RBM5, TGS1, NAP1L4	102	665	13528	0.797759	1	1	100
GOTERM_BP_FAT	GO:0043933~macromolecular complex subunit organization	4	2.73973	0.905468	IPO5, RBM5, TGS1, NAP1L4	102	710	13528	0.747197	1	1	100
Annotation Cluster 29	Enrichment Score: 0.1861874202111021
Category	Term	Count	%	PValue	Genes	List Total	Pop Hits	Pop Total	Fold Enrichment	Bonferroni	Benjamini	FDR
SP_PIR_KEYWORDS	actin-binding	3	2.05479	0.554138	CORO2B, SPIRE2, VILL	145	247	19235	1.6112	1	0.98622	99.9971
GOTERM_MF_FAT	GO:0003779~actin binding	3	2.05479	0.693343	CORO2B, SPIRE2, VILL	96	326	12983	1.24454	1	0.999983	100
GOTERM_MF_FAT	GO:0008092~cytoskeletal protein binding	4	2.73973	0.719236	CORO2B, SPIRE2, VILL, CAPN1	96	504	12983	1.07333	1	0.999984	100
Annotation Cluster 30	Enrichment Score: 0.17911574699494948
Category	Term	Count	%	PValue	Genes	List Total	Pop Hits	Pop Total	Fold Enrichment	Bonferroni	Benjamini	FDR
GOTERM_BP_FAT	GO:0007276~gamete generation	4	2.73973	0.569306	GJA10, FST, TSSK2, RHOXF1	102	395	13528	1.34306	1	0.999454	99.9998
GOTERM_BP_FAT	GO:0019953~sexual reproduction	4	2.73973	0.669677	GJA10, FST, TSSK2, RHOXF1	102	458	13528	1.15832	1	0.999902	100
GOTERM_BP_FAT	GO:0032504~multicellular organism reproduction	4	2.73973	0.709844	GJA10, FST, TSSK2, RHOXF1	102	487	13528	1.08934	1	0.999951	100
GOTERM_BP_FAT	GO:0048609~reproductive process in a multicellular organism	4	2.73973	0.709844	GJA10, FST, TSSK2, RHOXF1	102	487	13528	1.08934	1	0.999951	100
Annotation Cluster 31	Enrichment Score: 0.17833265111004945
Category	Term	Count	%	PValue	Genes	List Total	Pop Hits	Pop Total	Fold Enrichment	Bonferroni	Benjamini	FDR
SP_PIR_KEYWORDS	transport	14	9.58904	0.484025	PITPNB, ANO1, MTX1, SLC22A20, SPIRE2, HVCN1, STARD3, KCNN2, IPO5, SLC4A2, THOC5, NGB, COG1, SEC61G	145	1670	19235	1.11208	1	0.984075	99.9809
GOTERM_MF_FAT	GO:0015267~channel activity	4	2.73973	0.584567	GJA10, KCNN2, ANO1, HVCN1	96	412	12983	1.31301	1	0.999947	99.999
GOTERM_MF_FAT	GO:0022803~passive transmembrane transporter activity	4	2.73973	0.586226	GJA10, KCNN2, ANO1, HVCN1	96	413	12983	1.30983	1	0.999925	99.9991
SP_PIR_KEYWORDS	ion transport	5	3.42466	0.632196	KCNN2, ANO1, SLC22A20, SLC4A2, HVCN1	145	578	19235	1.14754	1	0.99313	99.9998
GOTERM_MF_FAT	GO:0022836~gated channel activity	3	2.05479	0.666461	KCNN2, ANO1, HVCN1	96	310	12983	1.30877	1	0.999974	99.9999
SP_PIR_KEYWORDS	ionic channel	3	2.05479	0.690992	KCNN2, ANO1, HVCN1	145	318	19235	1.25146	1	0.995956	100
GOTERM_MF_FAT	GO:0005216~ion channel activity	3	2.05479	0.778762	KCNN2, ANO1, HVCN1	96	386	12983	1.05108	1	0.999993	100
GOTERM_MF_FAT	GO:0022838~substrate specific channel activity	3	2.05479	0.793149	KCNN2, ANO1, HVCN1	96	398	12983	1.01939	1	0.999992	100
GOTERM_BP_FAT	GO:0006811~ion transport	5	3.42466	0.832494	KCNN2, ANO1, SLC22A20, SLC4A2, HVCN1	102	768	13528	0.86346	1	0.999999	100
Annotation Cluster 32	Enrichment Score: 0.17779252790861644
Category	Term	Count	%	PValue	Genes	List Total	Pop Hits	Pop Total	Fold Enrichment	Bonferroni	Benjamini	FDR
GOTERM_MF_FAT	GO:0043167~ion binding	36	24.6575	0.221711	GTF3A, SH3RF1, THAP4, ZMYND10, F13A1, ANO1, RBM5, ITGA11, NR3C1, ZNF365, VILL, DAGLA, ANXA9, PPP2CA, MUS81, ILVBL, ZNF408, DCTD, POLK, OSGEP, EGR2, MAT2A, RELA, AKAP8L, SPIRE2, AFG3L2, CAPN1, MARCH2, LETM1, HEBP1, FARSB, TSSK2, NGB, ZNF414, ATP8A1, ADAR	96	4241	12983	1.14799	1	0.999442	96.2887
GOTERM_MF_FAT	GO:0046872~metal ion binding	35	23.9726	0.237355	GTF3A, SH3RF1, THAP4, ZMYND10, F13A1, ANO1, RBM5, ITGA11, NR3C1, ZNF365, VILL, DAGLA, ANXA9, PPP2CA, MUS81, ILVBL, ZNF408, DCTD, POLK, OSGEP, EGR2, MAT2A, AKAP8L, SPIRE2, AFG3L2, CAPN1, MARCH2, LETM1, HEBP1, FARSB, TSSK2, NGB, ZNF414, ATP8A1, ADAR	96	4140	12983	1.14333	1	0.999317	97.1579
GOTERM_MF_FAT	GO:0043169~cation binding	35	23.9726	0.257478	GTF3A, SH3RF1, THAP4, ZMYND10, F13A1, ANO1, RBM5, ITGA11, NR3C1, ZNF365, VILL, DAGLA, ANXA9, PPP2CA, MUS81, ILVBL, ZNF408, DCTD, POLK, OSGEP, EGR2, MAT2A, AKAP8L, SPIRE2, AFG3L2, CAPN1, MARCH2, LETM1, HEBP1, FARSB, TSSK2, NGB, ZNF414, ATP8A1, ADAR	96	4179	12983	1.13266	1	0.999311	97.9999
SP_PIR_KEYWORDS	metal-binding	26	17.8082	0.294672	GTF3A, SH3RF1, THAP4, WRNIP1, F13A1, ZMYND10, RBM5, NR3C1, DAGLA, PPP2CA, MUS81, ILVBL, ZNF408, DCTD, POLK, EGR2, OSGEP, MAT2A, AKAP8L, AFG3L2, MARCH2, TSSK2, ZNF414, NGB, ADAR, ATP8A1	145	2972	19235	1.16051	1	0.966864	98.9086
SMART	SM00355:ZnF_C2H2	7	4.79452	0.448998	GTF3A, EGR2, RBM5, AKAP8L, ZNF408, ZNF365, ZNF414	62	797	9079	1.28613	1	0.999946	99.7743
SP_PIR_KEYWORDS	zinc	18	12.3288	0.474811	DCTD, GTF3A, POLK, SH3RF1, OSGEP, EGR2, THAP4, ZMYND10, WRNIP1, RBM5, AKAP8L, NR3C1, AFG3L2, MARCH2, PPP2CA, ZNF408, ZNF414, ADAR	145	2189	19235	1.09081	1	0.985691	99.976
GOTERM_MF_FAT	GO:0046914~transition metal ion binding	22	15.0685	0.478433	DCTD, SH3RF1, GTF3A, POLK, OSGEP, EGR2, MAT2A, THAP4, ZMYND10, RBM5, AKAP8L, NR3C1, ZNF365, SPIRE2, AFG3L2, MARCH2, PPP2CA, HEBP1, NGB, ZNF414, ZNF408, ADAR	96	2785	12983	1.06832	1	0.999901	99.9807
GOTERM_MF_FAT	GO:0008270~zinc ion binding	18	12.3288	0.532627	DCTD, GTF3A, POLK, SH3RF1, OSGEP, EGR2, THAP4, ZMYND10, RBM5, AKAP8L, ZNF365, SPIRE2, NR3C1, AFG3L2, MARCH2, ZNF408, ZNF414, ADAR	96	2311	12983	1.05336	1	0.999909	99.9954
INTERPRO	IPR015880:Zinc finger, C2H2-like	7	4.79452	0.579003	GTF3A, EGR2, RBM5, AKAP8L, ZNF408, ZNF365, ZNF414	129	797	16659	1.13422	1	1	99.9991
SP_PIR_KEYWORDS	zinc-finger	13	8.90411	0.642458	GTF3A, POLK, SH3RF1, EGR2, THAP4, ZMYND10, WRNIP1, AKAP8L, RBM5, NR3C1, MARCH2, ZNF408, ZNF414	145	1718	19235	1.00379	1	0.99339	99.9998
UP_SEQ_FEATURE	zinc finger region:C2H2-type 1	4	2.73973	0.779174	GTF3A, EGR2, ZNF408, ZNF414	145	542	19113	0.972796	1	1	100
GOTERM_MF_FAT	GO:0003677~DNA binding	15	10.274	0.829566	GTF3A, POLK, EGR2, THAP4, RELA, WRNIP1, RBM5, AKAP8L, NR3C1, ORC1L, MUS81, ZNF408, ZNF414, RHOXF1, ADAR	96	2331	12983	0.870268	1	0.999997	100
UP_SEQ_FEATURE	zinc finger region:C2H2-type 2	4	2.73973	0.840797	GTF3A, EGR2, ZNF408, ZNF414	145	608	19113	0.867196	1	1	100
UP_SEQ_FEATURE	zinc finger region:C2H2-type 3	4	2.73973	0.851794	GTF3A, EGR2, ZNF408, ZNF414	145	622	19113	0.847677	1	1	100
INTERPRO	IPR007087:Zinc finger, C2H2-type	5	3.42466	0.858289	GTF3A, EGR2, RBM5, ZNF408, ZNF414	129	784	16659	0.823594	1	1	100
SP_PIR_KEYWORDS	dna-binding	11	7.53425	0.902525	POLK, GTF3A, EGR2, THAP4, RELA, ZNF408, NR3C1, ZNF414, RHOXF1, ORC1L, ADAR	145	1868	19235	0.78116	1	0.99986	100
GOTERM_MF_FAT	GO:0043565~sequence-specific DNA binding	3	2.05479	0.940757	RELA, NR3C1, RHOXF1	96	607	12983	0.6684	1	1	100
INTERPRO	IPR013087:Zinc finger, C2H2-type/integrase, DNA-binding	3	2.05479	0.954526	GTF3A, EGR2, ZNF408	129	621	16659	0.623862	1	1	100
GOTERM_MF_FAT	GO:0003700~transcription factor activity	4	2.73973	0.977407	EGR2, RELA, NR3C1, RHOXF1	96	975	12983	0.554829	1	1	100
GOTERM_BP_FAT	GO:0051252~regulation of RNA metabolic process	8	5.47945	0.986816	EGR2, RELA, FST, RBM5, YWHAQ, SNW1, NR3C1, RHOXF1	102	1813	13528	0.585229	1	1	100
SP_PIR_KEYWORDS	transcription regulation	9	6.16438	0.987791	DPY30, GTF3A, EGR2, RELA, ZNF408, NR3C1, ZNF414, TGS1, RHOXF1	145	2026	19235	0.589288	1	1	100
GOTERM_MF_FAT	GO:0030528~transcription regulator activity	6	4.10959	0.989542	GTF3A, EGR2, RELA, SNW1, NR3C1, RHOXF1	96	1512	12983	0.536665	1	1	100
SP_PIR_KEYWORDS	Transcription	9	6.16438	0.990202	DPY30, GTF3A, EGR2, RELA, ZNF408, NR3C1, ZNF414, TGS1, RHOXF1	145	2071	19235	0.576483	1	1	100
GOTERM_BP_FAT	GO:0045449~regulation of transcription	12	8.21918	0.991799	GTF3A, EGR2, RELA, PPP2CA, FST, YWHAQ, SNW1, ZNF408, NR3C1, ZNF414, TGS1, RHOXF1	102	2601	13528	0.611891	1	1	100
GOTERM_BP_FAT	GO:0006355~regulation of transcription, DNA-dependent	7	4.79452	0.993944	EGR2, RELA, FST, YWHAQ, SNW1, NR3C1, RHOXF1	102	1773	13528	0.523628	1	1	100
GOTERM_BP_FAT	GO:0006350~transcription	8	5.47945	0.997252	GTF3A, EGR2, RELA, ZNF408, NR3C1, ZNF414, TGS1, RHOXF1	102	2101	13528	0.505007	1	1	100
Annotation Cluster 33	Enrichment Score: 0.14463102253278928
Category	Term	Count	%	PValue	Genes	List Total	Pop Hits	Pop Total	Fold Enrichment	Bonferroni	Benjamini	FDR
GOTERM_BP_FAT	GO:0016337~cell-cell adhesion	3	2.05479	0.614054	ANXA9, CLDN20, FGF4	102	276	13528	1.4416	1	0.999715	100
GOTERM_BP_FAT	GO:0007155~cell adhesion	5	3.42466	0.77389	ANXA9, COL6A3, ITGA11, CLDN20, FGF4	102	700	13528	0.947339	1	0.999992	100
GOTERM_BP_FAT	GO:0022610~biological adhesion	5	3.42466	0.774855	ANXA9, COL6A3, ITGA11, CLDN20, FGF4	102	701	13528	0.945988	1	0.999991	100
Annotation Cluster 34	Enrichment Score: 0.1420429194573998
Category	Term	Count	%	PValue	Genes	List Total	Pop Hits	Pop Total	Fold Enrichment	Bonferroni	Benjamini	FDR
SP_PIR_KEYWORDS	microtubule	3	2.05479	0.517998	SPAG5, DYNLT1, DYNC1H1	145	231	19235	1.72279	1	0.98559	99.9921
GOTERM_CC_FAT	GO:0005874~microtubule	3	2.05479	0.646442	SPAG5, DYNLT1, DYNC1H1	103	274	12782	1.35873	1	0.999743	99.9997
GOTERM_CC_FAT	GO:0015630~microtubule cytoskeleton	4	2.73973	0.819951	SPAG5, PPP2CA, DYNLT1, DYNC1H1	103	549	12782	0.904168	1	0.99978	100
GOTERM_CC_FAT	GO:0044430~cytoskeletal part	4	2.73973	0.984425	SPAG5, PPP2CA, DYNLT1, DYNC1H1	103	952	12782	0.521416	1	0.999999	100
Annotation Cluster 35	Enrichment Score: 0.11175490190467774
Category	Term	Count	%	PValue	Genes	List Total	Pop Hits	Pop Total	Fold Enrichment	Bonferroni	Benjamini	FDR
GOTERM_CC_FAT	GO:0005739~mitochondrion	9	6.16438	0.646811	PABPN1, LETM1, PPP2CA, MTX1, HEBP1, ROMO1, NR3C1, AFG3L2, TMEM14C	103	1087	12782	1.02748	1	0.999629	99.9997
GOTERM_CC_FAT	GO:0005743~mitochondrial inner membrane	3	2.05479	0.705487	LETM1, MTX1, AFG3L2	103	306	12782	1.21664	1	0.999798	100
GOTERM_CC_FAT	GO:0031967~organelle envelope	5	3.42466	0.735576	RTN4, LETM1, MTX1, IPO5, AFG3L2	103	620	12782	1.00078	1	0.999733	100
GOTERM_CC_FAT	GO:0031975~envelope	5	3.42466	0.737893	RTN4, LETM1, MTX1, IPO5, AFG3L2	103	622	12782	0.997565	1	0.99966	100
GOTERM_CC_FAT	GO:0019866~organelle inner membrane	3	2.05479	0.74273	LETM1, MTX1, AFG3L2	103	329	12782	1.13158	1	0.999598	100
GOTERM_CC_FAT	GO:0031090~organelle membrane	8	5.47945	0.782305	RTN4, LETM1, CHST7, MTX1, KRTCAP2, AFG3L2, ALG12, SEC61G	103	1096	12782	0.905818	1	0.999729	100
GOTERM_CC_FAT	GO:0031966~mitochondrial membrane	3	2.05479	0.827037	LETM1, MTX1, AFG3L2	103	394	12782	0.944902	1	0.999769	100
GOTERM_CC_FAT	GO:0005740~mitochondrial envelope	3	2.05479	0.852296	LETM1, MTX1, AFG3L2	103	419	12782	0.888523	1	0.999822	100
GOTERM_CC_FAT	GO:0044429~mitochondrial part	4	2.73973	0.85985	LETM1, MTX1, NR3C1, AFG3L2	103	595	12782	0.834266	1	0.999822	100
SP_PIR_KEYWORDS	mitochondrion	5	3.42466	0.874618	LETM1, MTX1, ROMO1, AFG3L2, TMEM14C	145	832	19235	0.797207	1	0.999753	100
Annotation Cluster 36	Enrichment Score: 0.06638540733324685
Category	Term	Count	%	PValue	Genes	List Total	Pop Hits	Pop Total	Fold Enrichment	Bonferroni	Benjamini	FDR
SP_PIR_KEYWORDS	signal	22	15.0685	0.801987	TM9SF1, GPR128, TNFRSF21, LMAN1L, FAM20B, IL19, FST, ITLN2, ITGA11, CSNK2B, SIRPB2, SLAMF8, PIGR, MOG, FCAMR, SEMA3F, COL6A3, C19ORF18, SERPIND1, IL5RA, LECT2, FGF4	145	3250	19235	0.897973	1	0.999138	100
GOTERM_CC_FAT	GO:0005615~extracellular space	5	3.42466	0.803341	SEMA3F, IL19, COL6A3, IL5RA, LECT2	103	685	12782	0.905818	1	0.999794	100
UP_SEQ_FEATURE	signal peptide	22	15.0685	0.811302	TM9SF1, GPR128, TNFRSF21, LMAN1L, FAM20B, IL19, FST, ITLN2, ITGA11, CSNK2B, SIRPB2, SLAMF8, PIGR, MOG, FCAMR, SEMA3F, COL6A3, C19ORF18, SERPIND1, IL5RA, LECT2, FGF4	145	3250	19113	0.892278	1	1	100
SP_PIR_KEYWORDS	Secreted	10	6.84932	0.894628	SEMA3F, FAM20B, F13A1, IL19, ITLN2, FST, COL6A3, CSNK2B, PIGR, LECT2	145	1689	19235	0.785407	1	0.999836	100
GOTERM_CC_FAT	GO:0005576~extracellular region	13	8.90411	0.896261	F13A1, FAM20B, FST, ITLN2, IL19, CSNK2B, PIGR, SEMA3F, COL6A3, IL5RA, SERPIND1, LECT2, FGF4	103	2010	12782	0.802618	1	0.999878	100
GOTERM_CC_FAT	GO:0044421~extracellular region part	5	3.42466	0.953587	SEMA3F, IL19, COL6A3, IL5RA, LECT2	103	960	12782	0.646339	1	0.999989	100
Annotation Cluster 37	Enrichment Score: 0.06418218683590562
Category	Term	Count	%	PValue	Genes	List Total	Pop Hits	Pop Total	Fold Enrichment	Bonferroni	Benjamini	FDR
GOTERM_BP_FAT	GO:0010605~negative regulation of macromolecule metabolic process	7	4.79452	0.470228	PSME1, RELA, PPP2CA, FST, YWHAQ, SNW1, ADAR	102	734	13528	1.26484	1	0.998531	99.9949
GOTERM_BP_FAT	GO:0010629~negative regulation of gene expression	4	2.73973	0.731618	FST, YWHAQ, SNW1, ADAR	102	504	13528	1.0526	1	0.999971	100
GOTERM_BP_FAT	GO:0016481~negative regulation of transcription	3	2.05479	0.861798	FST, YWHAQ, SNW1	102	459	13528	0.866846	1	1	100
GOTERM_BP_FAT	GO:0045934~negative regulation of nucleobase, nucleoside, nucleotide and nucleic acid metabolic process	3	2.05479	0.89988	FST, YWHAQ, SNW1	102	512	13528	0.777114	1	1	100
GOTERM_BP_FAT	GO:0051172~negative regulation of nitrogen compound metabolic process	3	2.05479	0.904116	FST, YWHAQ, SNW1	102	519	13528	0.766633	1	1	100
GOTERM_BP_FAT	GO:0006357~regulation of transcription from RNA polymerase II promoter	4	2.73973	0.913862	EGR2, RELA, FST, SNW1	102	727	13528	0.729725	1	1	100
GOTERM_BP_FAT	GO:0010558~negative regulation of macromolecule biosynthetic process	3	2.05479	0.919455	FST, YWHAQ, SNW1	102	547	13528	0.72739	1	1	100
GOTERM_BP_FAT	GO:0031327~negative regulation of cellular biosynthetic process	3	2.05479	0.926238	FST, YWHAQ, SNW1	102	561	13528	0.709238	1	1	100
GOTERM_BP_FAT	GO:0009890~negative regulation of biosynthetic process	3	2.05479	0.931625	FST, YWHAQ, SNW1	102	573	13528	0.694385	1	1	100
GOTERM_BP_FAT	GO:0051252~regulation of RNA metabolic process	8	5.47945	0.986816	EGR2, RELA, FST, RBM5, YWHAQ, SNW1, NR3C1, RHOXF1	102	1813	13528	0.585229	1	1	100
GOTERM_MF_FAT	GO:0030528~transcription regulator activity	6	4.10959	0.989542	GTF3A, EGR2, RELA, SNW1, NR3C1, RHOXF1	96	1512	12983	0.536665	1	1	100
GOTERM_BP_FAT	GO:0006355~regulation of transcription, DNA-dependent	7	4.79452	0.993944	EGR2, RELA, FST, YWHAQ, SNW1, NR3C1, RHOXF1	102	1773	13528	0.523628	1	1	100
Annotation Cluster 38	Enrichment Score: 0.043582637017947706
Category	Term	Count	%	PValue	Genes	List Total	Pop Hits	Pop Total	Fold Enrichment	Bonferroni	Benjamini	FDR
SP_PIR_KEYWORDS	signal	22	15.0685	0.801987	TM9SF1, GPR128, TNFRSF21, LMAN1L, FAM20B, IL19, FST, ITLN2, ITGA11, CSNK2B, SIRPB2, SLAMF8, PIGR, MOG, FCAMR, SEMA3F, COL6A3, C19ORF18, SERPIND1, IL5RA, LECT2, FGF4	145	3250	19235	0.897973	1	0.999138	100
UP_SEQ_FEATURE	signal peptide	22	15.0685	0.811302	TM9SF1, GPR128, TNFRSF21, LMAN1L, FAM20B, IL19, FST, ITLN2, ITGA11, CSNK2B, SIRPB2, SLAMF8, PIGR, MOG, FCAMR, SEMA3F, COL6A3, C19ORF18, SERPIND1, IL5RA, LECT2, FGF4	145	3250	19113	0.892278	1	1	100
UP_SEQ_FEATURE	glycosylation site:N-linked (GlcNAc...)	26	17.8082	0.913249	GPR128, TNFRSF21, SLC44A4, F13A1, FAM20B, IL19, ANO1, FST, ITGA11, SIRPB2, MOG, DAGLA, SEMA3F, COL6A3, SLC4A2, TM9SF1, LMAN1L, TOR1AIP1, CSNK2B, SLAMF8, SLC22A20, PIGR, FCAMR, CHST7, SERPIND1, IL5RA	145	4129	19113	0.830021	1	1	100
SP_PIR_KEYWORDS	glycoprotein	26	17.8082	0.945199	GPR128, TNFRSF21, SLC44A4, F13A1, FAM20B, IL19, ANO1, FST, ITGA11, SIRPB2, MOG, DAGLA, SEMA3F, COL6A3, SLC4A2, TM9SF1, LMAN1L, TOR1AIP1, CSNK2B, SLAMF8, SLC22A20, PIGR, FCAMR, CHST7, SERPIND1, IL5RA	145	4318	19235	0.798757	1	0.999978	100
UP_SEQ_FEATURE	disulfide bond	14	9.58904	0.985171	TNFRSF21, IL19, FST, CSNK2B, ITGA11, SIRPB2, SLAMF8, PIGR, FCAMR, MOG, SEMA3F, COL6A3, VKORC1, NGB	145	2819	19113	0.654627	1	1	100
SP_PIR_KEYWORDS	disulfide bond	14	9.58904	0.98976	TNFRSF21, IL19, FST, CSNK2B, ITGA11, SIRPB2, SLAMF8, PIGR, FCAMR, MOG, SEMA3F, COL6A3, VKORC1, NGB	145	2924	19235	0.635148	1	1	100
Annotation Cluster 39	Enrichment Score: 0.03064132468961832
Category	Term	Count	%	PValue	Genes	List Total	Pop Hits	Pop Total	Fold Enrichment	Bonferroni	Benjamini	FDR
GOTERM_BP_FAT	GO:0010604~positive regulation of macromolecule metabolic process	5	3.42466	0.889795	EGR2, PSME1, RELA, BRE, RPS4X	102	857	13528	0.773789	1	1	100
GOTERM_BP_FAT	GO:0045935~positive regulation of nucleobase, nucleoside, nucleotide and nucleic acid metabolic process	3	2.05479	0.950663	EGR2, RELA, BRE	102	624	13528	0.637632	1	1	100
GOTERM_BP_FAT	GO:0051173~positive regulation of nitrogen compound metabolic process	3	2.05479	0.956664	EGR2, RELA, BRE	102	644	13528	0.61783	1	1	100
Annotation Cluster 40	Enrichment Score: 0.025872757116967134
Category	Term	Count	%	PValue	Genes	List Total	Pop Hits	Pop Total	Fold Enrichment	Bonferroni	Benjamini	FDR
GOTERM_CC_FAT	GO:0000267~cell fraction	7	4.79452	0.87303	TALDO1, PPP2CA, VKORC1, YWHAQ, FARSB, SLC4A2, CAPN1	103	1083	12782	0.802105	1	0.999855	100
GOTERM_CC_FAT	GO:0005626~insoluble fraction	4	2.73973	0.967473	TALDO1, VKORC1, SLC4A2, CAPN1	103	839	12782	0.591643	1	0.999995	100
GOTERM_CC_FAT	GO:0005624~membrane fraction	3	2.05479	0.990179	TALDO1, VKORC1, SLC4A2	103	809	12782	0.460187	1	1	100
Annotation Cluster 41	Enrichment Score: 0.024255641393262483
Category	Term	Count	%	PValue	Genes	List Total	Pop Hits	Pop Total	Fold Enrichment	Bonferroni	Benjamini	FDR
GOTERM_BP_FAT	GO:0010604~positive regulation of macromolecule metabolic process	5	3.42466	0.889795	EGR2, PSME1, RELA, BRE, RPS4X	102	857	13528	0.773789	1	1	100
GOTERM_BP_FAT	GO:0010557~positive regulation of macromolecule biosynthetic process	3	2.05479	0.959398	EGR2, RELA, RPS4X	102	654	13528	0.608383	1	1	100
GOTERM_BP_FAT	GO:0031328~positive regulation of cellular biosynthetic process	3	2.05479	0.966872	EGR2, RELA, RPS4X	102	685	13528	0.58085	1	1	100
GOTERM_BP_FAT	GO:0009891~positive regulation of biosynthetic process	3	2.05479	0.96899	EGR2, RELA, RPS4X	102	695	13528	0.572493	1	1	100
Annotation Cluster 42	Enrichment Score: 0.010987526165236789
Category	Term	Count	%	PValue	Genes	List Total	Pop Hits	Pop Total	Fold Enrichment	Bonferroni	Benjamini	FDR
GOTERM_CC_FAT	GO:0005887~integral to plasma membrane	6	4.10959	0.96621	APH1A, ITGA11, PSENEN, RCE1, IL5RA, PIGR	103	1188	12782	0.626753	1	0.999995	100
GOTERM_CC_FAT	GO:0031226~intrinsic to plasma membrane	6	4.10959	0.970933	APH1A, ITGA11, PSENEN, RCE1, IL5RA, PIGR	103	1215	12782	0.612825	1	0.999995	100
GOTERM_CC_FAT	GO:0044459~plasma membrane part	11	7.53425	0.988045	GJA10, APH1A, ITGA11, SLC4A2, PSENEN, RCE1, CLDN20, IL5RA, PIGR, COG1, ARHGAP26	103	2203	12782	0.61964	1	1	100
