# Supplementary material for: Systems Biology Approach to the Dissection of the Complexity of Regulatory Networks in the S. scrofa Cardiocirculatory System
Source: MDPI journal article supplement (doi:10.3390/ijms141123160), 2013-11-21
Supplement: s5 [file s5]

## Sheet: Supplementary Table S4.txt
Annotation Cluster 1	Enrichment Score: 3.5198559988079525
Category	Term	Count	%	PValue	Genes	List Total	Pop Hits	Pop Total	Fold Enrichment	Bonferroni	Benjamini	FDR
GOTERM_CC_FAT	GO:0043232~intracellular non-membrane-bounded organelle	30	28.3019	0.000109532	MYL6, HMGN1, RPL36A, CNN3, VIM, RBM5, TPM1, FOS, ACTG2, LOC100291837, PBXIP1, NPM1, RPS21, TUBA1B, TUBA1C, INO80B, ACTB, PABPN1, ACTC1, ACTA2, ACTN1, MYH7, TMSB10, DCTN6, C19ORF33, PGM5, RPL18A, NOP56, ABL1, MYH10	74	2596	12782	1.99611	0.0243447	0.00818167	0.139841
GOTERM_CC_FAT	GO:0043228~non-membrane-bounded organelle	30	28.3019	0.000109532	MYL6, HMGN1, RPL36A, CNN3, VIM, RBM5, TPM1, FOS, ACTG2, LOC100291837, PBXIP1, NPM1, RPS21, TUBA1B, TUBA1C, INO80B, ACTB, PABPN1, ACTC1, ACTA2, ACTN1, MYH7, TMSB10, DCTN6, C19ORF33, PGM5, RPL18A, NOP56, ABL1, MYH10	74	2596	12782	1.99611	0.0243447	0.00818167	0.139841
GOTERM_CC_FAT	GO:0015629~actin cytoskeleton	9	8.49057	0.000142751	MYL6, ACTG2, ACTC1, PGM5, ACTA2, MYH7, DCTN6, TPM1, MYH10	74	269	12782	5.77906	0.0316108	0.00799815	0.182217
GOTERM_CC_FAT	GO:0005856~cytoskeleton	20	18.8679	0.000201324	MYL6, ACTB, RPL36A, ACTC1, CNN3, ACTA2, VIM, ACTN1, TMSB10, MYH7, DCTN6, TPM1, ACTG2, PGM5, PBXIP1, NPM1, ABL1, TUBA1B, TUBA1C, MYH10	74	1381	12782	2.50152	0.0442917	0.00752198	0.256895
GOTERM_CC_FAT	GO:0044430~cytoskeletal part	13	12.2642	0.00729737	MYL6, ACTC1, CNN3, VIM, MYH7, DCTN6, TPM1, PGM5, PBXIP1, NPM1, TUBA1B, TUBA1C, MYH10	74	952	12782	2.3587	0.807552	0.119058	8.93247
Annotation Cluster 2	Enrichment Score: 3.0453057857068915
Category	Term	Count	%	PValue	Genes	List Total	Pop Hits	Pop Total	Fold Enrichment	Bonferroni	Benjamini	FDR
SP_PIR_KEYWORDS	muscle protein	7	6.60377	9.03032e-07	MYL6, ACTG2, ACTC1, TAGLN, ACTA2, MYH7, TPM1	106	60	19235	21.1706	0.000195939	9.79742e-05	0.00114696
GOTERM_CC_FAT	GO:0044449~contractile fiber part	8	7.54717	3.52584e-06	ACTG2, ACTC1, PGM5, ACTA2, ACTN1, MYH7, TPM1, ENO1	74	113	12782	12.2287	0.000793001	0.000793001	0.00450432
GOTERM_CC_FAT	GO:0043292~contractile fiber	8	7.54717	5.55935e-06	ACTG2, ACTC1, PGM5, ACTA2, ACTN1, MYH7, TPM1, ENO1	74	121	12782	11.4201	0.00125007	0.000625233	0.00710207
GOTERM_BP_FAT	GO:0006936~muscle contraction	8	7.54717	3.02522e-05	MYL6, PABPN1, ACTG2, ACTC1, CNN3, ACTA2, MYH7, TPM1	80	153	13528	8.84183	0.0240297	0.0120879	0.0464576
GOTERM_BP_FAT	GO:0003012~muscle system process	8	7.54717	5.49792e-05	MYL6, PABPN1, ACTG2, ACTC1, CNN3, ACTA2, MYH7, TPM1	80	168	13528	8.05238	0.0432417	0.0146268	0.0844152
INTERPRO	IPR004001:Actin, conserved site	4	3.77358	9.23778e-05	ACTB, ACTG2, ACTC1, ACTA2	95	16	16659	43.8395	0.0214758	0.0214758	0.118774
GOTERM_CC_FAT	GO:0015629~actin cytoskeleton	9	8.49057	0.000142751	MYL6, ACTG2, ACTC1, PGM5, ACTA2, MYH7, DCTN6, TPM1, MYH10	74	269	12782	5.77906	0.0316108	0.00799815	0.182217
SP_PIR_KEYWORDS	methylated amino acid	4	3.77358	0.000168416	ACTB, ACTG2, ACTC1, ACTA2	106	20	19235	36.2925	0.0358895	0.00607304	0.213699
GOTERM_CC_FAT	GO:0030485~smooth muscle contractile fiber	3	2.83019	0.000191611	ACTG2, ACTC1, ACTA2	74	4	12782	129.547	0.0422003	0.00858625	0.244515
PIR_SUPERFAMILY	PIRSF002337:Actin	4	3.77358	0.000220126	ACTB, ACTG2, ACTC1, ACTA2	54	17	7396	32.2266	0.0124702	0.0124702	0.21798
GOTERM_BP_FAT	GO:0006939~smooth muscle contraction	4	3.77358	0.000921803	ACTG2, ACTC1, CNN3, ACTA2	80	33	13528	20.497	0.523588	0.0885185	1.40657
GOTERM_BP_FAT	GO:0014829~vascular smooth muscle contraction	3	2.83019	0.00118044	ACTG2, ACTC1, ACTA2	80	9	13528	56.3667	0.613118	0.100139	1.79788
SMART	SM00268:ACTIN	4	3.77358	0.00124934	ACTB, ACTG2, ACTC1, ACTA2	51	39	9079	18.2584	0.0687775	0.0350013	1.2315
INTERPRO	IPR004000:Actin/actin-like	4	3.77358	0.00137243	ACTB, ACTG2, ACTC1, ACTA2	95	39	16659	17.9854	0.27584	0.0625095	1.75125
SP_PIR_KEYWORDS	cytoskeleton	11	10.3774	0.00250459	ACTB, ACTG2, ACTC1, PGM5, PBXIP1, ACTA2, ACTN1, TMSB10, DCTN6, ABL1, TPM1	106	636	19235	3.1385	0.419681	0.0482669	3.13494
GOTERM_BP_FAT	GO:0042310~vasoconstriction	3	2.83019	0.00432642	ACTG2, ACTC1, ACTA2	80	17	13528	29.8412	0.969377	0.220419	6.44291
GOTERM_BP_FAT	GO:0008217~regulation of blood pressure	4	3.77358	0.0206731	ACTG2, ACTC1, ACTA2, TPM1	80	100	13528	6.764	1	0.50332	27.4482
GOTERM_BP_FAT	GO:0050880~regulation of blood vessel size	3	2.83019	0.038302	ACTG2, ACTC1, ACTA2	80	53	13528	9.5717	1	0.648894	45.1125
GOTERM_BP_FAT	GO:0035150~regulation of tube size	3	2.83019	0.038302	ACTG2, ACTC1, ACTA2	80	53	13528	9.5717	1	0.648894	45.1125
GOTERM_BP_FAT	GO:0003018~vascular process in circulatory system	3	2.83019	0.0451001	ACTG2, ACTC1, ACTA2	80	58	13528	8.74655	1	0.643227	50.779
GOTERM_BP_FAT	GO:0003013~circulatory system process	4	3.77358	0.0950114	ACTG2, ACTC1, ACTA2, TPM1	80	186	13528	3.63656	1	0.812167	78.4209
GOTERM_BP_FAT	GO:0008015~blood circulation	4	3.77358	0.0950114	ACTG2, ACTC1, ACTA2, TPM1	80	186	13528	3.63656	1	0.812167	78.4209
UP_SEQ_FEATURE	propeptide:Removed in mature form	4	3.77358	0.131857	ACTG2, ACTC1, ACTA2, RHOB	106	229	19113	3.14954	1	0.996218	85.6002
Annotation Cluster 3	Enrichment Score: 2.476825098852253
Category	Term	Count	%	PValue	Genes	List Total	Pop Hits	Pop Total	Fold Enrichment	Bonferroni	Benjamini	FDR
GOTERM_CC_FAT	GO:0042641~actomyosin	4	3.77358	0.000473742	ACTC1, PGM5, TPM1, MYH10	74	27	12782	25.5896	0.10113	0.0117765	0.60354
GOTERM_CC_FAT	GO:0001725~stress fiber	3	2.83019	0.00818655	PGM5, TPM1, MYH10	74	24	12782	21.5912	0.842693	0.123756	9.96908
GOTERM_CC_FAT	GO:0032432~actin filament bundle	3	2.83019	0.00956934	PGM5, TPM1, MYH10	74	26	12782	19.9304	0.885074	0.134312	11.5596
Annotation Cluster 4	Enrichment Score: 2.475241358524568
Category	Term	Count	%	PValue	Genes	List Total	Pop Hits	Pop Total	Fold Enrichment	Bonferroni	Benjamini	FDR
SP_PIR_KEYWORDS	muscle protein	7	6.60377	9.03032e-07	MYL6, ACTG2, ACTC1, TAGLN, ACTA2, MYH7, TPM1	106	60	19235	21.1706	0.000195939	9.79742e-05	0.00114696
GOTERM_CC_FAT	GO:0044449~contractile fiber part	8	7.54717	3.52584e-06	ACTG2, ACTC1, PGM5, ACTA2, ACTN1, MYH7, TPM1, ENO1	74	113	12782	12.2287	0.000793001	0.000793001	0.00450432
GOTERM_CC_FAT	GO:0043292~contractile fiber	8	7.54717	5.55935e-06	ACTG2, ACTC1, PGM5, ACTA2, ACTN1, MYH7, TPM1, ENO1	74	121	12782	11.4201	0.00125007	0.000625233	0.00710207
GOTERM_BP_FAT	GO:0030048~actin filament-based movement	5	4.71698	8.76646e-06	MYL6, ACTC1, MYH7, TPM1, MYH10	80	23	13528	36.7609	0.00702348	0.00702348	0.0134645
GOTERM_BP_FAT	GO:0006936~muscle contraction	8	7.54717	3.02522e-05	MYL6, PABPN1, ACTG2, ACTC1, CNN3, ACTA2, MYH7, TPM1	80	153	13528	8.84183	0.0240297	0.0120879	0.0464576
GOTERM_BP_FAT	GO:0003012~muscle system process	8	7.54717	5.49792e-05	MYL6, PABPN1, ACTG2, ACTC1, CNN3, ACTA2, MYH7, TPM1	80	168	13528	8.05238	0.0432417	0.0146268	0.0844152
GOTERM_BP_FAT	GO:0030029~actin filament-based process	9	8.49057	7.92483e-05	MYL6, ACTC1, CNN3, ACTN1, TMSB10, MYH7, ABL1, TPM1, MYH10	80	241	13528	6.31494	0.0617306	0.0158033	0.121657
GOTERM_CC_FAT	GO:0015629~actin cytoskeleton	9	8.49057	0.000142751	MYL6, ACTG2, ACTC1, PGM5, ACTA2, MYH7, DCTN6, TPM1, MYH10	74	269	12782	5.77906	0.0316108	0.00799815	0.182217
GOTERM_BP_FAT	GO:0030705~cytoskeleton-dependent intracellular transport	5	4.71698	0.000235722	MYL6, ACTC1, MYH7, TPM1, MYH10	80	52	13528	16.2596	0.172663	0.0310967	0.361459
GOTERM_CC_FAT	GO:0030017~sarcomere	6	5.66038	0.000237769	ACTC1, PGM5, ACTN1, MYH7, TPM1, ENO1	74	98	12782	10.5753	0.0520982	0.00761435	0.303335
GOTERM_CC_FAT	GO:0030016~myofibril	6	5.66038	0.0004237	ACTC1, PGM5, ACTN1, MYH7, TPM1, ENO1	74	111	12782	9.33674	0.0909477	0.0118483	0.539946
GOTERM_CC_FAT	GO:0042641~actomyosin	4	3.77358	0.000473742	ACTC1, PGM5, TPM1, MYH10	74	27	12782	25.5896	0.10113	0.0117765	0.60354
GOTERM_BP_FAT	GO:0031032~actomyosin structure organization	4	3.77358	0.000565226	ACTC1, CNN3, TPM1, MYH10	80	28	13528	24.1571	0.365279	0.062875	0.864678
GOTERM_MF_FAT	GO:0030898~actin-dependent ATPase activity	3	2.83019	0.00105059	MYL6, MYH7, MYH10	82	8	12983	59.3735	0.191303	0.100724	1.31098
GOTERM_BP_FAT	GO:0030049~muscle filament sliding	3	2.83019	0.00118044	MYL6, MYH7, TPM1	80	9	13528	56.3667	0.613118	0.100139	1.79788
GOTERM_BP_FAT	GO:0033275~actin-myosin filament sliding	3	2.83019	0.00118044	MYL6, MYH7, TPM1	80	9	13528	56.3667	0.613118	0.100139	1.79788
GOTERM_BP_FAT	GO:0070252~actin-mediated cell contraction	3	2.83019	0.00118044	MYL6, MYH7, TPM1	80	9	13528	56.3667	0.613118	0.100139	1.79788
GOTERM_BP_FAT	GO:0048738~cardiac muscle tissue development	4	3.77358	0.00447136	ACTC1, MYH7, TPM1, MYH10	80	57	13528	11.8667	0.972759	0.213531	6.65189
GOTERM_BP_FAT	GO:0014706~striated muscle tissue development	5	4.71698	0.00514945	MYL6, ACTC1, MYH7, TPM1, MYH10	80	119	13528	7.10504	0.984249	0.228507	7.62376
GOTERM_BP_FAT	GO:0060537~muscle tissue development	5	4.71698	0.0061219	MYL6, ACTC1, MYH7, TPM1, MYH10	80	125	13528	6.764	0.992825	0.25205	9.00103
GOTERM_CC_FAT	GO:0044430~cytoskeletal part	13	12.2642	0.00729737	MYL6, ACTC1, CNN3, VIM, MYH7, DCTN6, TPM1, PGM5, PBXIP1, NPM1, TUBA1B, TUBA1C, MYH10	74	952	12782	2.3587	0.807552	0.119058	8.93247
GOTERM_BP_FAT	GO:0007517~muscle organ development	6	5.66038	0.00780089	MYL6, ACTC1, TAGLN, MYH7, TPM1, MYH10	80	211	13528	4.80853	0.998157	0.282079	11.3339
GOTERM_BP_FAT	GO:0060415~muscle tissue morphogenesis	3	2.83019	0.0107528	ACTC1, MYH7, TPM1	80	27	13528	18.7889	0.999832	0.338938	15.3003
GOTERM_BP_FAT	GO:0055008~cardiac muscle tissue morphogenesis	3	2.83019	0.0107528	ACTC1, MYH7, TPM1	80	27	13528	18.7889	0.999832	0.338938	15.3003
KEGG_PATHWAY	hsa04260:Cardiac muscle contraction	4	3.77358	0.0228396	ACTC1, ATP1B3, MYH7, TPM1	41	78	5085	6.36023	0.725786	0.276361	20.3989
GOTERM_MF_FAT	GO:0008307~structural constituent of muscle	3	2.83019	0.0281754	MYL6, MYH7, TPM1	82	42	12983	11.3092	0.99689	0.561649	30.1488
SP_PIR_KEYWORDS	Cardiomyopathy	3	2.83019	0.0282869	ACTC1, MYH7, TPM1	106	48	19235	11.3414	0.998024	0.359027	30.5428
KEGG_PATHWAY	hsa05410:Hypertrophic cardiomyopathy (HCM)	4	3.77358	0.0285579	ACTB, ACTC1, MYH7, TPM1	41	85	5085	5.83644	0.8026	0.277115	24.881
GOTERM_BP_FAT	GO:0006941~striated muscle contraction	3	2.83019	0.0295282	ACTC1, MYH7, TPM1	80	46	13528	11.0283	1	0.577113	36.896
SP_PIR_KEYWORDS	myosin	3	2.83019	0.0316387	MYL6, MYH7, MYH10	106	51	19235	10.6743	0.999066	0.336605	33.5251
KEGG_PATHWAY	hsa05414:Dilated cardiomyopathy	4	3.77358	0.0349716	ACTB, ACTC1, MYH7, TPM1	41	92	5085	5.39236	0.863778	0.282689	29.6372
GOTERM_MF_FAT	GO:0008092~cytoskeletal protein binding	8	7.54717	0.0375842	ACTC1, TAGLN, CNN3, ACTN1, TMSB10, MYH7, TPM1, MYH10	82	504	12983	2.51316	0.999564	0.61989	38.1799
GOTERM_CC_FAT	GO:0031674~I band	3	2.83019	0.0393306	ACTC1, PGM5, ACTN1	74	55	12782	9.42162	0.99988	0.363267	40.1071
GOTERM_CC_FAT	GO:0016459~myosin complex	3	2.83019	0.0531302	MYL6, MYH7, MYH10	74	65	12782	7.97214	0.999995	0.427845	50.2151
GOTERM_MF_FAT	GO:0016887~ATPase activity	6	5.66038	0.0575052	MYL6, ABCF3, ACTC1, ATP1B3, MYH7, MYH10	82	334	12983	2.84424	0.999994	0.66297	52.4568
GOTERM_BP_FAT	GO:0003007~heart morphogenesis	3	2.83019	0.067833	ACTC1, MYH7, TPM1	80	73	13528	6.94932	1	0.74778	66.0046
GOTERM_BP_FAT	GO:0007507~heart development	4	3.77358	0.130923	ACTC1, MYH7, TPM1, MYH10	80	215	13528	3.14605	1	0.871429	88.4141
SP_PIR_KEYWORDS	motor protein	3	2.83019	0.162366	MYL6, MYH7, MYH10	106	132	19235	4.12414	1	0.699247	89.4637
KEGG_PATHWAY	hsa04270:Vascular smooth muscle contraction	3	2.83019	0.21987	MYL6, ACTG2, ACTA2	41	112	5085	3.32208	0.999999	0.686109	91.3858
GOTERM_MF_FAT	GO:0003774~motor activity	3	2.83019	0.221994	MYL6, MYH7, MYH10	82	142	12983	3.34498	1	0.930661	95.7208
GOTERM_MF_FAT	GO:0042623~ATPase activity, coupled	4	3.77358	0.240848	MYL6, ATP1B3, MYH7, MYH10	82	272	12983	2.32837	1	0.920348	96.8552
GOTERM_BP_FAT	GO:0048729~tissue morphogenesis	3	2.83019	0.283212	ACTC1, MYH7, TPM1	80	180	13528	2.81833	1	0.97183	99.3991
Annotation Cluster 5	Enrichment Score: 2.036534549717917
Category	Term	Count	%	PValue	Genes	List Total	Pop Hits	Pop Total	Fold Enrichment	Bonferroni	Benjamini	FDR
GOTERM_CC_FAT	GO:0044449~contractile fiber part	8	7.54717	3.52584e-06	ACTG2, ACTC1, PGM5, ACTA2, ACTN1, MYH7, TPM1, ENO1	74	113	12782	12.2287	0.000793001	0.000793001	0.00450432
GOTERM_CC_FAT	GO:0043292~contractile fiber	8	7.54717	5.55935e-06	ACTG2, ACTC1, PGM5, ACTA2, ACTN1, MYH7, TPM1, ENO1	74	121	12782	11.4201	0.00125007	0.000625233	0.00710207
GOTERM_CC_FAT	GO:0030017~sarcomere	6	5.66038	0.000237769	ACTC1, PGM5, ACTN1, MYH7, TPM1, ENO1	74	98	12782	10.5753	0.0520982	0.00761435	0.303335
GOTERM_CC_FAT	GO:0030016~myofibril	6	5.66038	0.0004237	ACTC1, PGM5, ACTN1, MYH7, TPM1, ENO1	74	111	12782	9.33674	0.0909477	0.0118483	0.539946
GOTERM_CC_FAT	GO:0005925~focal adhesion	3	2.83019	0.115239	PGM5, ACTN1, MYH7	74	102	12782	5.08029	1	0.639519	79.0743
GOTERM_CC_FAT	GO:0005924~cell-substrate adherens junction	3	2.83019	0.122746	PGM5, ACTN1, MYH7	74	106	12782	4.88858	1	0.650884	81.2328
GOTERM_CC_FAT	GO:0030055~cell-substrate junction	3	2.83019	0.134224	PGM5, ACTN1, MYH7	74	112	12782	4.62669	1	0.648693	84.139
GOTERM_CC_FAT	GO:0005912~adherens junction	3	2.83019	0.221721	PGM5, ACTN1, MYH7	74	155	12782	3.34316	1	0.773324	95.9336
GOTERM_CC_FAT	GO:0070161~anchoring junction	3	2.83019	0.257653	PGM5, ACTN1, MYH7	74	172	12782	3.01273	1	0.797314	97.7769
GOTERM_CC_FAT	GO:0016323~basolateral plasma membrane	3	2.83019	0.323248	PGM5, ACTN1, MYH7	74	203	12782	2.55266	1	0.833521	99.3182
GOTERM_CC_FAT	GO:0030054~cell junction	4	3.77358	0.572538	PGM5, DENND1A, ACTN1, MYH7	74	518	12782	1.33382	1	0.956493	99.9981
Annotation Cluster 6	Enrichment Score: 2.0237568572410956
Category	Term	Count	%	PValue	Genes	List Total	Pop Hits	Pop Total	Fold Enrichment	Bonferroni	Benjamini	FDR
GOTERM_BP_FAT	GO:0030048~actin filament-based movement	5	4.71698	8.76646e-06	MYL6, ACTC1, MYH7, TPM1, MYH10	80	23	13528	36.7609	0.00702348	0.00702348	0.0134645
GOTERM_BP_FAT	GO:0030029~actin filament-based process	9	8.49057	7.92483e-05	MYL6, ACTC1, CNN3, ACTN1, TMSB10, MYH7, ABL1, TPM1, MYH10	80	241	13528	6.31494	0.0617306	0.0158033	0.121657
GOTERM_BP_FAT	GO:0030705~cytoskeleton-dependent intracellular transport	5	4.71698	0.000235722	MYL6, ACTC1, MYH7, TPM1, MYH10	80	52	13528	16.2596	0.172663	0.0310967	0.361459
GOTERM_CC_FAT	GO:0042641~actomyosin	4	3.77358	0.000473742	ACTC1, PGM5, TPM1, MYH10	74	27	12782	25.5896	0.10113	0.0117765	0.60354
GOTERM_BP_FAT	GO:0031032~actomyosin structure organization	4	3.77358	0.000565226	ACTC1, CNN3, TPM1, MYH10	80	28	13528	24.1571	0.365279	0.062875	0.864678
SP_PIR_KEYWORDS	actin binding	4	3.77358	0.00134842	TAGLN, CNN3, ACTN1, TPM1	106	40	19235	18.1462	0.253832	0.0359389	1.69922
GOTERM_BP_FAT	GO:0030036~actin cytoskeleton organization	7	6.60377	0.00204872	ACTC1, CNN3, ACTN1, TMSB10, ABL1, TPM1, MYH10	80	226	13528	5.23761	0.807731	0.128383	3.10098
SP_PIR_KEYWORDS	actin-binding	7	6.60377	0.00235608	TAGLN, CNN3, ACTN1, TMSB10, MYH7, TPM1, MYH10	106	247	19235	5.14266	0.400628	0.0552877	2.95162
GOTERM_BP_FAT	GO:0007010~cytoskeleton organization	9	8.49057	0.00385344	ACTC1, CNN3, NPM1, ACTN1, TMSB10, ABL1, TPM1, TUBA1B, MYH10	80	436	13528	3.4906	0.955137	0.212412	5.75793
GOTERM_BP_FAT	GO:0048738~cardiac muscle tissue development	4	3.77358	0.00447136	ACTC1, MYH7, TPM1, MYH10	80	57	13528	11.8667	0.972759	0.213531	6.65189
GOTERM_BP_FAT	GO:0014706~striated muscle tissue development	5	4.71698	0.00514945	MYL6, ACTC1, MYH7, TPM1, MYH10	80	119	13528	7.10504	0.984249	0.228507	7.62376
GOTERM_BP_FAT	GO:0060537~muscle tissue development	5	4.71698	0.0061219	MYL6, ACTC1, MYH7, TPM1, MYH10	80	125	13528	6.764	0.992825	0.25205	9.00103
GOTERM_BP_FAT	GO:0030239~myofibril assembly	3	2.83019	0.00658037	ACTC1, TPM1, MYH10	80	21	13528	24.1571	0.995049	0.25539	9.64367
GOTERM_BP_FAT	GO:0007517~muscle organ development	6	5.66038	0.00780089	MYL6, ACTC1, TAGLN, MYH7, TPM1, MYH10	80	211	13528	4.80853	0.998157	0.282079	11.3339
GOTERM_MF_FAT	GO:0003779~actin binding	7	6.60377	0.016076	TAGLN, CNN3, ACTN1, TMSB10, MYH7, TPM1, MYH10	82	326	12983	3.39971	0.962135	0.480426	18.41
GOTERM_BP_FAT	GO:0010927~cellular component assembly involved in morphogenesis	3	2.83019	0.0186585	ACTC1, TPM1, MYH10	80	36	13528	14.0917	1	0.497583	25.1215
GOTERM_BP_FAT	GO:0055002~striated muscle cell development	3	2.83019	0.036994	ACTC1, TPM1, MYH10	80	52	13528	9.75577	1	0.648336	43.9546
GOTERM_MF_FAT	GO:0008092~cytoskeletal protein binding	8	7.54717	0.0375842	ACTC1, TAGLN, CNN3, ACTN1, TMSB10, MYH7, TPM1, MYH10	82	504	12983	2.51316	0.999564	0.61989	38.1799
GOTERM_BP_FAT	GO:0055001~muscle cell development	3	2.83019	0.0423302	ACTC1, TPM1, MYH10	80	56	13528	9.05893	1	0.640409	48.5396
SMART	SM00033:CH	3	2.83019	0.056631	TAGLN, CNN3, ACTN1	51	70	9079	7.62941	0.963954	0.564275	43.8902
INTERPRO	IPR001715:Calponin-like actin-binding	3	2.83019	0.0594119	TAGLN, CNN3, ACTN1	95	70	16659	7.51534	0.999999	0.797963	54.5222
GOTERM_BP_FAT	GO:0051146~striated muscle cell differentiation	3	2.83019	0.0935119	ACTC1, TPM1, MYH10	80	88	13528	5.76477	1	0.813525	77.8651
GOTERM_BP_FAT	GO:0007507~heart development	4	3.77358	0.130923	ACTC1, MYH7, TPM1, MYH10	80	215	13528	3.14605	1	0.871429	88.4141
SP_PIR_KEYWORDS	calmodulin-binding	3	2.83019	0.139644	CNN3, MYH7, MYH10	106	120	19235	4.53656	1	0.651062	85.1976
GOTERM_BP_FAT	GO:0042692~muscle cell differentiation	3	2.83019	0.15733	ACTC1, TPM1, MYH10	80	121	13528	4.19256	1	0.899119	92.7874
GOTERM_BP_FAT	GO:0032989~cellular component morphogenesis	5	4.71698	0.201861	ACTB, S100A6, ACTC1, TPM1, MYH10	80	397	13528	2.12972	1	0.933174	96.8673
GOTERM_MF_FAT	GO:0005516~calmodulin binding	3	2.83019	0.217404	CNN3, MYH7, MYH10	82	140	12983	3.39277	1	0.936136	95.3929
GOTERM_CC_FAT	GO:0044463~cell projection part	3	2.83019	0.387432	CNN3, TPM1, MYH10	74	234	12782	2.21448	1	0.880041	99.8091
Annotation Cluster 7	Enrichment Score: 1.8236142577076553
Category	Term	Count	%	PValue	Genes	List Total	Pop Hits	Pop Total	Fold Enrichment	Bonferroni	Benjamini	FDR
GOTERM_CC_FAT	GO:0030529~ribonucleoprotein complex	11	10.3774	0.000654544	PABPN1, ACTB, RPL36A, LOC100291837, RPL18A, NPM1, U2AF1, RBM5, NOP56, RPS21, SF3B4	74	515	12782	3.68937	0.136983	0.0146241	0.832992
SMART	SM00360:RRM	7	6.60377	0.000993646	PABPN1, RPL36A, TRA2B, U2AF1, RBM5, CPNE1, SF3B4	51	211	9079	5.90586	0.0550903	0.0550903	0.980572
INTERPRO	IPR000504:RNA recognition motif, RNP-1	7	6.60377	0.00124068	PABPN1, RPL36A, TRA2B, U2AF1, RBM5, CPNE1, SF3B4	95	211	16659	5.81756	0.253038	0.13573	1.58437
INTERPRO	IPR012677:Nucleotide-binding, alpha-beta plait	7	6.60377	0.00130208	PABPN1, RPL36A, TRA2B, U2AF1, RBM5, CPNE1, SF3B4	95	213	16659	5.76294	0.263752	0.097027	1.66217
GOTERM_BP_FAT	GO:0000375~RNA splicing, via transesterification reactions	6	5.66038	0.00199391	PABPN1, RPL36A, TRA2B, U2AF1, RBM5, SF3B4	80	153	13528	6.63137	0.799051	0.13574	3.0192
GOTERM_BP_FAT	GO:0000377~RNA splicing, via transesterification reactions with bulged adenosine as nucleophile	6	5.66038	0.00199391	PABPN1, RPL36A, TRA2B, U2AF1, RBM5, SF3B4	80	153	13528	6.63137	0.799051	0.13574	3.0192
GOTERM_BP_FAT	GO:0000398~nuclear mRNA splicing, via spliceosome	6	5.66038	0.00199391	PABPN1, RPL36A, TRA2B, U2AF1, RBM5, SF3B4	80	153	13528	6.63137	0.799051	0.13574	3.0192
GOTERM_MF_FAT	GO:0003723~RNA binding	12	11.3208	0.00483534	PABPN1, RPL36A, RPL18A, TRA2B, NPM1, U2AF1, RBM5, CPNE1, SLC4A1AP, LGTN, NOP56, SF3B4	82	718	12983	2.64617	0.624354	0.278461	5.90375
UP_SEQ_FEATURE	domain:RRM 1	4	3.77358	0.0182046	RPL36A, RBM5, CPNE1, SF3B4	106	101	19113	7.14104	0.99853	0.886285	22.2604
UP_SEQ_FEATURE	domain:RRM 2	4	3.77358	0.0182046	RPL36A, RBM5, CPNE1, SF3B4	106	101	19113	7.14104	0.99853	0.886285	22.2604
GOTERM_BP_FAT	GO:0008380~RNA splicing	6	5.66038	0.0251696	PABPN1, RPL36A, TRA2B, U2AF1, RBM5, SF3B4	80	284	13528	3.57254	1	0.545376	32.3996
SP_PIR_KEYWORDS	rna-binding	8	7.54717	0.0285031	PABPN1, RPL36A, TRA2B, NPM1, U2AF1, RBM5, CPNE1, SF3B4	106	540	19235	2.68833	0.998117	0.341859	30.7388
GOTERM_BP_FAT	GO:0006397~mRNA processing	6	5.66038	0.0395533	PABPN1, RPL36A, TRA2B, U2AF1, RBM5, SF3B4	80	321	13528	3.16075	1	0.648896	46.1993
GOTERM_BP_FAT	GO:0006396~RNA processing	8	7.54717	0.0403228	PABPN1, SRRT, RPL36A, TRA2B, U2AF1, RBM5, NOP56, SF3B4	80	547	13528	2.47313	1	0.644455	46.8576
SP_PIR_KEYWORDS	mrna processing	5	4.71698	0.054186	PABPN1, TRA2B, U2AF1, RBM5, SF3B4	106	260	19235	3.48966	0.999994	0.470731	50.7164
GOTERM_BP_FAT	GO:0016071~mRNA metabolic process	6	5.66038	0.0650781	PABPN1, RPL36A, TRA2B, U2AF1, RBM5, SF3B4	80	370	13528	2.74216	1	0.741427	64.4282
SP_PIR_KEYWORDS	mrna splicing	4	3.77358	0.106477	TRA2B, U2AF1, RBM5, SF3B4	106	209	19235	3.47296	1	0.609231	76.068
UP_SEQ_FEATURE	domain:RRM	3	2.83019	0.139194	PABPN1, TRA2B, U2AF1	106	119	19113	4.54566	1	0.995112	87.1815
SP_PIR_KEYWORDS	Spliceosome	3	2.83019	0.139644	U2AF1, RBM5, SF3B4	106	120	19235	4.53656	1	0.651062	85.1976
GOTERM_CC_FAT	GO:0005681~spliceosome	3	2.83019	0.17401	U2AF1, RBM5, SF3B4	74	132	12782	3.92568	1	0.717792	91.304
KEGG_PATHWAY	hsa03040:Spliceosome	3	2.83019	0.260874	TRA2B, U2AF1, SF3B4	41	126	5085	2.95296	1	0.728055	94.9455
Annotation Cluster 8	Enrichment Score: 1.7661426848729282
Category	Term	Count	%	PValue	Genes	List Total	Pop Hits	Pop Total	Fold Enrichment	Bonferroni	Benjamini	FDR
SP_PIR_KEYWORDS	EF hand	6	5.66038	1.89476e-05	S100A6, CAPNS1, ENPP2, SPARCL1, ACTN1, S100A2	106	60	19235	18.1462	0.00410322	0.00102739	0.0240632
INTERPRO	IPR018249:EF-HAND 2	7	6.60377	0.00136578	MYL6, S100A6, CAPNS1, CALML4, SPARCL1, ACTN1, S100A2	95	215	16659	5.70933	0.274706	0.0771554	1.74283
INTERPRO	IPR011992:EF-Hand type	7	6.60377	0.00218802	MYL6, S100A6, CAPNS1, CALML4, SPARCL1, ACTN1, S100A2	95	236	16659	5.20129	0.40235	0.0822145	2.77852
SP_PIR_KEYWORDS	calcium binding	5	4.71698	0.00245009	S100A6, CAPNS1, ACTN1, ANXA4, S100A2	106	103	19235	8.80885	0.41276	0.0518402	3.0677
UP_SEQ_FEATURE	domain:EF-hand 2	6	5.66038	0.00332143	MYL6, S100A6, CAPNS1, CALML4, ACTN1, S100A2	106	182	19113	5.94433	0.69305	0.69305	4.45741
UP_SEQ_FEATURE	domain:EF-hand 1	5	4.71698	0.0180635	MYL6, S100A6, CALML4, ACTN1, S100A2	106	182	19113	4.95361	0.998453	0.960662	22.107
INTERPRO	IPR018247:EF-HAND 1	5	4.71698	0.0344363	S100A6, CAPNS1, SPARCL1, ACTN1, S100A2	95	217	16659	4.0405	0.999735	0.691628	36.2888
SMART	SM00054:EFh	4	3.77358	0.0438135	MYL6, CAPNS1, CALML4, ACTN1	51	143	9079	4.97957	0.922209	0.573116	35.8592
INTERPRO	IPR002048:Calcium-binding EF-hand	4	3.77358	0.0471799	MYL6, CAPNS1, CALML4, ACTN1	95	143	16659	4.90512	0.999988	0.758206	46.2984
UP_SEQ_FEATURE	domain:EF-hand 3	3	2.83019	0.0944334	MYL6, CAPNS1, CALML4	106	94	19113	5.75462	1	0.997174	74.3216
SP_PIR_KEYWORDS	duplication	4	3.77358	0.128846	CAPNS1, ACTN1, C4BPA, ANXA4	106	228	19235	3.18355	1	0.631289	82.6568
INTERPRO	IPR018248:EF hand	3	2.83019	0.166896	MYL6, S100A6, ACTN1	95	130	16659	4.04672	1	0.986309	90.4536
GOTERM_MF_FAT	GO:0005509~calcium ion binding	8	7.54717	0.349149	MYL6, S100A6, CAPNS1, CALML4, SPARCL1, ACTN1, ANXA4, S100A2	82	919	12983	1.37827	1	0.959768	99.5446
SP_PIR_KEYWORDS	calcium	6	5.66038	0.447377	S100A6, CAPNS1, SPARCL1, ACTN1, ANXA4, S100A2	106	803	19235	1.35588	1	0.946333	99.9465
Annotation Cluster 9	Enrichment Score: 1.6837035834834626
Category	Term	Count	%	PValue	Genes	List Total	Pop Hits	Pop Total	Fold Enrichment	Bonferroni	Benjamini	FDR
GOTERM_BP_FAT	GO:0010035~response to inorganic substance	7	6.60377	0.00124812	ACTB, FOS, SRRT, SEC31A, DUSP1, MYH7, TPM1	80	205	13528	5.77415	0.633632	0.095535	1.90004
GOTERM_BP_FAT	GO:0051592~response to calcium ion	3	2.83019	0.0409703	ACTB, SEC31A, DUSP1	80	55	13528	9.22364	1	0.63912	47.4057
GOTERM_BP_FAT	GO:0010038~response to metal ion	3	2.83019	0.173845	ACTB, SEC31A, DUSP1	80	129	13528	3.93256	1	0.919306	94.6782
Annotation Cluster 10	Enrichment Score: 1.3018521765192332
Category	Term	Count	%	PValue	Genes	List Total	Pop Hits	Pop Total	Fold Enrichment	Bonferroni	Benjamini	FDR
GOTERM_BP_FAT	GO:0000302~response to reactive oxygen species	4	3.77358	0.00957411	FOS, DUSP1, MYH7, TPM1	80	75	13528	9.01867	0.999563	0.320728	13.7369
UP_SEQ_FEATURE	cross-link:Glycyl lysine isopeptide (Lys-Gly) (interchain with G-Cter in ubiquitin)	5	4.71698	0.0241418	FOS, EIF3I, MYH7, TPM1, TUBA1B	106	199	19113	4.53044	0.999829	0.885694	28.4618
SP_PIR_KEYWORDS	isopeptide bond	6	5.66038	0.0306479	FOS, NPM1, EIF3I, MYH7, TPM1, TUBA1B	106	319	19235	3.41308	0.998835	0.344374	32.656
GOTERM_BP_FAT	GO:0006979~response to oxidative stress	4	3.77358	0.0710261	FOS, DUSP1, MYH7, TPM1	80	164	13528	4.12439	1	0.747803	67.7499
GOTERM_MF_FAT	GO:0046982~protein heterodimerization activity	4	3.77358	0.140522	FOS, CAPNS1, NPM1, MYH7	82	208	12983	3.04479	1	0.887513	85.0598
SP_PIR_KEYWORDS	ubl conjugation	6	5.66038	0.218502	FOS, NPM1, EIF3I, MYH7, TPM1, TUBA1B	106	588	19235	1.85166	1	0.764475	95.6343
Annotation Cluster 11	Enrichment Score: 1.2295352469640015
Category	Term	Count	%	PValue	Genes	List Total	Pop Hits	Pop Total	Fold Enrichment	Bonferroni	Benjamini	FDR
GOTERM_BP_FAT	GO:0051270~regulation of cell motion	5	4.71698	0.0263346	RTN4, LAMA4, ENPP2, ACTN1, TPM1	80	193	13528	4.38083	1	0.548281	33.6299
GOTERM_BP_FAT	GO:0030334~regulation of cell migration	4	3.77358	0.0762061	RTN4, LAMA4, ENPP2, TPM1	80	169	13528	4.00237	1	0.757372	70.4042
GOTERM_BP_FAT	GO:0040012~regulation of locomotion	4	3.77358	0.102065	RTN4, LAMA4, ENPP2, TPM1	80	192	13528	3.52292	1	0.810726	80.8647
Annotation Cluster 12	Enrichment Score: 1.1960581036849407
Category	Term	Count	%	PValue	Genes	List Total	Pop Hits	Pop Total	Fold Enrichment	Bonferroni	Benjamini	FDR
GOTERM_BP_FAT	GO:0006414~translational elongation	4	3.77358	0.0212183	RPL36A, LOC100291837, RPL18A, RPS21	80	101	13528	6.69703	1	0.498285	28.0661
GOTERM_CC_FAT	GO:0005840~ribosome	5	4.71698	0.0344314	RPL36A, LOC100291837, RPL18A, NPM1, RPS21	74	215	12782	4.01697	0.999623	0.354659	36.0857
GOTERM_CC_FAT	GO:0033279~ribosomal subunit	4	3.77358	0.0367373	LOC100291837, RPL18A, NPM1, RPS21	74	128	12782	5.3978	0.99978	0.358046	38.0085
GOTERM_BP_FAT	GO:0006412~translation	6	5.66038	0.0441538	RPL36A, LOC100291837, RPL18A, EIF3I, LGTN, RPS21	80	331	13528	3.06526	1	0.645607	50.0244
GOTERM_CC_FAT	GO:0015935~small ribosomal subunit	3	2.83019	0.0502481	LOC100291837, NPM1, RPS21	74	63	12782	8.22523	0.999991	0.424416	48.2441
GOTERM_CC_FAT	GO:0044445~cytosolic part	4	3.77358	0.0561185	LOC100291837, RPL18A, RPS21, ENO1	74	152	12782	4.54552	0.999998	0.431635	52.1854
SP_PIR_KEYWORDS	ribosome	3	2.83019	0.0603972	LOC100291837, RPL18A, RPS21	106	73	19235	7.45735	0.999999	0.491319	54.6729
GOTERM_CC_FAT	GO:0022626~cytosolic ribosome	3	2.83019	0.0781283	LOC100291837, RPL18A, RPS21	74	81	12782	6.3974	1	0.519122	64.6287
SP_PIR_KEYWORDS	ribosomal protein	4	3.77358	0.0837803	RPL36A, LOC100291837, RPL18A, RPS21	106	188	19235	3.8609	1	0.562	67.0886
SP_PIR_KEYWORDS	protein biosynthesis	4	3.77358	0.0837803	LOC100291837, RPL18A, EIF3I, RPS21	106	188	19235	3.8609	1	0.562	67.0886
GOTERM_MF_FAT	GO:0003735~structural constituent of ribosome	4	3.77358	0.0875854	RPL36A, LOC100291837, RPL18A, RPS21	82	168	12983	3.76974	1	0.786252	68.3599
KEGG_PATHWAY	hsa03010:Ribosome	3	2.83019	0.148974	RPL36A, RPL18A, RPS21	41	87	5085	4.2767	0.999881	0.59479	79.6656
SP_PIR_KEYWORDS	ribonucleoprotein	4	3.77358	0.195717	RPL36A, LOC100291837, RPL18A, RPS21	106	279	19235	2.60161	1	0.75095	93.7111
Annotation Cluster 13	Enrichment Score: 1.1780066664943314
Category	Term	Count	%	PValue	Genes	List Total	Pop Hits	Pop Total	Fold Enrichment	Bonferroni	Benjamini	FDR
GOTERM_BP_FAT	GO:0046907~intracellular transport	14	13.2075	0.000101364	PABPN1, MYL6, ACTC1, SEC31A, MYH7, TPM1, NPM1, YWHAQ, RHOB, LGTN, KDELR1, COG1, SEC61G, MYH10	80	657	13528	3.60335	0.0782678	0.016168	0.155582
GOTERM_BP_FAT	GO:0016192~vesicle-mediated transport	8	7.54717	0.0507906	SEC31A, CPNE1, DENND1A, RHOB, VPS33B, KDELR1, COG1, MYH10	80	576	13528	2.34861	1	0.677831	55.0966
GOTERM_BP_FAT	GO:0008104~protein localization	10	9.43396	0.0709609	SEC31A, NPM1, YWHAQ, RHOB, TMSB10, LGTN, VPS33B, KDELR1, COG1, SEC61G	80	882	13528	1.91723	1	0.755612	67.7151
GOTERM_BP_FAT	GO:0015031~protein transport	9	8.49057	0.0759972	SEC31A, NPM1, YWHAQ, RHOB, LGTN, VPS33B, KDELR1, COG1, SEC61G	80	762	13528	1.99724	1	0.764084	70.3013
GOTERM_BP_FAT	GO:0045184~establishment of protein localization	9	8.49057	0.0791996	SEC31A, NPM1, YWHAQ, RHOB, LGTN, VPS33B, KDELR1, COG1, SEC61G	80	769	13528	1.97906	1	0.763585	71.8435
SP_PIR_KEYWORDS	protein transport	6	5.66038	0.126312	SEC31A, RHOB, VPS33B, KDELR1, COG1, SEC61G	106	485	19235	2.24489	1	0.635932	82.0051
GOTERM_BP_FAT	GO:0006886~intracellular protein transport	5	4.71698	0.17477	NPM1, YWHAQ, LGTN, KDELR1, SEC61G	80	374	13528	2.2607	1	0.917174	94.769
GOTERM_BP_FAT	GO:0034613~cellular protein localization	5	4.71698	0.218945	NPM1, YWHAQ, LGTN, KDELR1, SEC61G	80	411	13528	2.05718	1	0.94383	97.7531
GOTERM_BP_FAT	GO:0070727~cellular macromolecule localization	5	4.71698	0.222658	NPM1, YWHAQ, LGTN, KDELR1, SEC61G	80	414	13528	2.04227	1	0.944589	97.9117
SP_PIR_KEYWORDS	transport	9	8.49057	0.701197	SEC31A, ATP1B3, PITPNB, NDUFC2, RHOB, VPS33B, KDELR1, COG1, SEC61G	106	1670	19235	0.97794	1	0.99525	100
Annotation Cluster 14	Enrichment Score: 1.1351082998620716
Category	Term	Count	%	PValue	Genes	List Total	Pop Hits	Pop Total	Fold Enrichment	Bonferroni	Benjamini	FDR
GOTERM_CC_FAT	GO:0005730~nucleolus	11	10.3774	0.00608657	PABPN1, C19ORF33, FOS, RPL36A, NPM1, RBM5, ACTN1, MYH7, NOP56, ABL1, INO80B	74	698	12782	2.7221	0.746822	0.108163	7.50319
GOTERM_CC_FAT	GO:0031981~nuclear lumen	15	14.1509	0.0333092	ACTB, PABPN1, RPL36A, RBM5, ACTN1, MYH7, C19ORF33, FOS, SRRT, ERCC5, NPM1, U2AF1, NOP56, ABL1, INO80B	74	1450	12782	1.78686	0.999511	0.361329	35.1301
GOTERM_CC_FAT	GO:0070013~intracellular organelle lumen	15	14.1509	0.130259	ACTB, PABPN1, RPL36A, RBM5, ACTN1, MYH7, C19ORF33, FOS, SRRT, ERCC5, NPM1, U2AF1, NOP56, ABL1, INO80B	74	1779	12782	1.45641	1	0.661352	83.1857
GOTERM_CC_FAT	GO:0043233~organelle lumen	15	14.1509	0.148602	ACTB, PABPN1, RPL36A, RBM5, ACTN1, MYH7, C19ORF33, FOS, SRRT, ERCC5, NPM1, U2AF1, NOP56, ABL1, INO80B	74	1820	12782	1.4236	1	0.677341	87.194
GOTERM_CC_FAT	GO:0031974~membrane-enclosed lumen	15	14.1509	0.165849	ACTB, PABPN1, RPL36A, RBM5, ACTN1, MYH7, C19ORF33, FOS, SRRT, ERCC5, NPM1, U2AF1, NOP56, ABL1, INO80B	74	1856	12782	1.39598	1	0.709576	90.1402
GOTERM_CC_FAT	GO:0005654~nucleoplasm	8	7.54717	0.237611	PABPN1, ACTB, FOS, SRRT, RPL36A, ERCC5, NPM1, U2AF1	74	882	12782	1.56671	1	0.782609	96.8757
Annotation Cluster 15	Enrichment Score: 0.9849991300985306
Category	Term	Count	%	PValue	Genes	List Total	Pop Hits	Pop Total	Fold Enrichment	Bonferroni	Benjamini	FDR
GOTERM_BP_FAT	GO:0006006~glucose metabolic process	4	3.77358	0.060225	TALDO1, PGM5, AKR1A1, ENO1	80	153	13528	4.42092	1	0.722107	61.4837
GOTERM_BP_FAT	GO:0019318~hexose metabolic process	4	3.77358	0.102065	TALDO1, PGM5, AKR1A1, ENO1	80	192	13528	3.52292	1	0.810726	80.8647
GOTERM_BP_FAT	GO:0016052~carbohydrate catabolic process	3	2.83019	0.133203	TALDO1, AKR1A1, ENO1	80	109	13528	4.65413	1	0.871569	88.8724
GOTERM_BP_FAT	GO:0005996~monosaccharide metabolic process	4	3.77358	0.140228	TALDO1, PGM5, AKR1A1, ENO1	80	222	13528	3.04685	1	0.872404	90.1797
Annotation Cluster 16	Enrichment Score: 0.9237939227992833
Category	Term	Count	%	PValue	Genes	List Total	Pop Hits	Pop Total	Fold Enrichment	Bonferroni	Benjamini	FDR
GOTERM_MF_FAT	GO:0046983~protein dimerization activity	8	7.54717	0.0520479	FOS, S100A6, ERCC5, CAPNS1, NPM1, RUNX1T1, MYH7, NFE2L2	82	542	12983	2.33696	0.99998	0.698711	48.8828
GOTERM_MF_FAT	GO:0042803~protein homodimerization activity	5	4.71698	0.155484	S100A6, ERCC5, NPM1, RUNX1T1, MYH7	82	334	12983	2.3702	1	0.881579	88.0158
GOTERM_MF_FAT	GO:0042802~identical protein binding	7	6.60377	0.209185	DPY30, S100A6, ERCC5, NPM1, RUNX1T1, CSNK2B, MYH7	82	640	12983	1.73173	1	0.938498	94.7472
Annotation Cluster 17	Enrichment Score: 0.7827792432929909
Category	Term	Count	%	PValue	Genes	List Total	Pop Hits	Pop Total	Fold Enrichment	Bonferroni	Benjamini	FDR
GOTERM_CC_FAT	GO:0043025~cell soma	4	3.77358	0.0712513	RTN4, CNN3, DENND1A, MYH10	74	168	12782	4.11261	1	0.499913	61.1057
GOTERM_CC_FAT	GO:0043005~neuron projection	5	4.71698	0.131466	ACTB, CNN3, VIM, DENND1A, MYH10	74	342	12782	2.52529	1	0.652542	83.4813
GOTERM_CC_FAT	GO:0030425~dendrite	3	2.83019	0.238592	CNN3, DENND1A, MYH10	74	163	12782	3.17907	1	0.775953	96.9266
GOTERM_CC_FAT	GO:0045202~synapse	4	3.77358	0.330843	CNN3, SPARCL1, DENND1A, MYH10	74	355	12782	1.94625	1	0.835987	99.4097
Annotation Cluster 18	Enrichment Score: 0.729990871973997
Category	Term	Count	%	PValue	Genes	List Total	Pop Hits	Pop Total	Fold Enrichment	Bonferroni	Benjamini	FDR
GOTERM_BP_FAT	GO:0042981~regulation of apoptosis	9	8.49057	0.0964246	RTN4, ERCC5, DUSP1, BTG2, NPM1, RBM5, ACTN1, ABL1, ANXA4	80	804	13528	1.89291	1	0.810566	78.9327
GOTERM_BP_FAT	GO:0043067~regulation of programmed cell death	9	8.49057	0.100645	RTN4, ERCC5, DUSP1, BTG2, NPM1, RBM5, ACTN1, ABL1, ANXA4	80	812	13528	1.87426	1	0.818358	80.3944
GOTERM_BP_FAT	GO:0010941~regulation of cell death	9	8.49057	0.102254	RTN4, ERCC5, DUSP1, BTG2, NPM1, RBM5, ACTN1, ABL1, ANXA4	80	815	13528	1.86736	1	0.805309	80.9264
GOTERM_BP_FAT	GO:0043066~negative regulation of apoptosis	4	3.77358	0.341784	ERCC5, BTG2, NPM1, ANXA4	80	354	13528	1.91073	1	0.981739	99.8378
GOTERM_BP_FAT	GO:0043069~negative regulation of programmed cell death	4	3.77358	0.349807	ERCC5, BTG2, NPM1, ANXA4	80	359	13528	1.88412	1	0.981282	99.8656
GOTERM_BP_FAT	GO:0060548~negative regulation of cell death	4	3.77358	0.351411	ERCC5, BTG2, NPM1, ANXA4	80	360	13528	1.87889	1	0.979983	99.8706
Annotation Cluster 19	Enrichment Score: 0.687357308159366
Category	Term	Count	%	PValue	Genes	List Total	Pop Hits	Pop Total	Fold Enrichment	Bonferroni	Benjamini	FDR
GOTERM_BP_FAT	GO:0009991~response to extracellular stimulus	4	3.77358	0.137546	FOS, DUSP1, GNAI2, CSNK2B	80	220	13528	3.07455	1	0.871422	89.6986
GOTERM_BP_FAT	GO:0007584~response to nutrient	3	2.83019	0.196981	DUSP1, GNAI2, CSNK2B	80	140	13528	3.62357	1	0.933697	96.5598
GOTERM_BP_FAT	GO:0031667~response to nutrient levels	3	2.83019	0.31993	DUSP1, GNAI2, CSNK2B	80	197	13528	2.57513	1	0.979243	99.7321
Annotation Cluster 20	Enrichment Score: 0.6858549708722592
Category	Term	Count	%	PValue	Genes	List Total	Pop Hits	Pop Total	Fold Enrichment	Bonferroni	Benjamini	FDR
GOTERM_MF_FAT	GO:0000166~nucleotide binding	23	21.6981	0.0173525	ACTB, PABPN1, RPL36A, ACTC1, ABCF3, GNAI2, ACTA2, TRA2B, RBM5, UBE2F, MYH7, CLK1, SF3B4, ACTG2, DHRS3, UBA1, CPNE1, U2AF1, RHOB, ABL1, TUBA1B, TUBA1C, MYH10	82	2245	12983	1.62208	0.97087	0.445301	19.7291
KEGG_PATHWAY	hsa05416:Viral myocarditis	4	3.77358	0.0178182	ACTB, MYH7, ABL1, MYH10	41	71	5085	6.98729	0.634619	0.285095	16.2664
SP_PIR_KEYWORDS	nucleotide-binding	15	14.1509	0.074497	ACTB, ACTC1, ABCF3, GNAI2, ACTA2, UBE2F, MYH7, CLK1, ACTG2, UBA1, RHOB, ABL1, TUBA1B, TUBA1C, MYH10	106	1686	19235	1.61443	1	0.534025	62.5927
SP_PIR_KEYWORDS	atp-binding	11	10.3774	0.186996	ACTB, ACTG2, ABCF3, ACTC1, ACTA2, UBA1, UBE2F, MYH7, CLK1, ABL1, MYH10	106	1326	19235	1.50534	1	0.743676	92.7879
GOTERM_MF_FAT	GO:0032553~ribonucleotide binding	15	14.1509	0.249567	ACTB, ACTC1, ABCF3, GNAI2, ACTA2, UBE2F, MYH7, CLK1, ACTG2, UBA1, RHOB, ABL1, TUBA1B, TUBA1C, MYH10	82	1836	12983	1.29354	1	0.919664	97.2797
GOTERM_MF_FAT	GO:0032555~purine ribonucleotide binding	15	14.1509	0.249567	ACTB, ACTC1, ABCF3, GNAI2, ACTA2, UBE2F, MYH7, CLK1, ACTG2, UBA1, RHOB, ABL1, TUBA1B, TUBA1C, MYH10	82	1836	12983	1.29354	1	0.919664	97.2797
GOTERM_MF_FAT	GO:0017076~purine nucleotide binding	15	14.1509	0.305217	ACTB, ACTC1, ABCF3, GNAI2, ACTA2, UBE2F, MYH7, CLK1, ACTG2, UBA1, RHOB, ABL1, TUBA1B, TUBA1C, MYH10	82	1918	12983	1.23824	1	0.953345	98.966
GOTERM_MF_FAT	GO:0001883~purine nucleoside binding	12	11.3208	0.415189	ACTB, ACTG2, ABCF3, ACTC1, ACTA2, UBA1, RHOB, UBE2F, MYH7, CLK1, ABL1, MYH10	82	1601	12983	1.18673	1	0.973008	99.8811
GOTERM_MF_FAT	GO:0001882~nucleoside binding	12	11.3208	0.424389	ACTB, ACTG2, ABCF3, ACTC1, ACTA2, UBA1, RHOB, UBE2F, MYH7, CLK1, ABL1, MYH10	82	1612	12983	1.17863	1	0.972649	99.9026
GOTERM_MF_FAT	GO:0005524~ATP binding	11	10.3774	0.442527	ACTB, ACTG2, ABCF3, ACTC1, ACTA2, UBA1, UBE2F, MYH7, CLK1, ABL1, MYH10	82	1477	12983	1.17916	1	0.972037	99.9348
GOTERM_MF_FAT	GO:0032559~adenyl ribonucleotide binding	11	10.3774	0.46	ACTB, ACTG2, ABCF3, ACTC1, ACTA2, UBA1, UBE2F, MYH7, CLK1, ABL1, MYH10	82	1497	12983	1.16341	1	0.97429	99.9563
GOTERM_MF_FAT	GO:0030554~adenyl nucleotide binding	11	10.3774	0.528991	ACTB, ACTG2, ABCF3, ACTC1, ACTA2, UBA1, UBE2F, MYH7, CLK1, ABL1, MYH10	82	1577	12983	1.10439	1	0.985367	99.9921
UP_SEQ_FEATURE	nucleotide phosphate-binding region:ATP	5	4.71698	0.780814	UBA1, MYH7, CLK1, ABL1, MYH10	106	962	19113	0.937169	1	1	100
Annotation Cluster 21	Enrichment Score: 0.665566650836137
Category	Term	Count	%	PValue	Genes	List Total	Pop Hits	Pop Total	Fold Enrichment	Bonferroni	Benjamini	FDR
SP_PIR_KEYWORDS	cell adhesion	5	4.71698	0.199394	VCAM1, LAMA4, PGM5, RHOB, ABL1	106	422	19235	2.15003	1	0.748118	94.0667
GOTERM_BP_FAT	GO:0007155~cell adhesion	7	6.60377	0.224325	VCAM1, LAMA4, PGM5, CPXM2, RHOB, ACTN1, ABL1	80	700	13528	1.691	1	0.94367	97.9794
GOTERM_BP_FAT	GO:0022610~biological adhesion	7	6.60377	0.225274	VCAM1, LAMA4, PGM5, CPXM2, RHOB, ACTN1, ABL1	80	701	13528	1.68859	1	0.94217	98.0171
Annotation Cluster 22	Enrichment Score: 0.6334507525411577
Category	Term	Count	%	PValue	Genes	List Total	Pop Hits	Pop Total	Fold Enrichment	Bonferroni	Benjamini	FDR
GOTERM_BP_FAT	GO:0007568~aging	3	2.83019	0.13518	FOS, ERCC5, NPM1	80	110	13528	4.61182	1	0.871079	89.2558
GOTERM_CC_FAT	GO:0005654~nucleoplasm	8	7.54717	0.237611	PABPN1, ACTB, FOS, SRRT, RPL36A, ERCC5, NPM1, U2AF1	74	882	12782	1.56671	1	0.782609	96.8757
GOTERM_CC_FAT	GO:0044451~nucleoplasm part	5	4.71698	0.391624	ACTB, FOS, ERCC5, NPM1, U2AF1	74	555	12782	1.55612	1	0.878731	99.8251
Annotation Cluster 23	Enrichment Score: 0.5717630611461975
Category	Term	Count	%	PValue	Genes	List Total	Pop Hits	Pop Total	Fold Enrichment	Bonferroni	Benjamini	FDR
GOTERM_MF_FAT	GO:0003924~GTPase activity	4	3.77358	0.14486	GNAI2, RHOB, TUBA1B, TUBA1C	82	211	12983	3.0015	1	0.878446	85.9793
KEGG_PATHWAY	hsa04540:Gap junction	3	2.83019	0.154461	GNAI2, TUBA1B, TUBA1C	41	89	5085	4.1806	0.999917	0.574358	80.9239
UP_SEQ_FEATURE	nucleotide phosphate-binding region:GTP	4	3.77358	0.220924	GNAI2, RHOB, TUBA1B, TUBA1C	106	295	19113	2.4449	1	0.99938	96.7339
SP_PIR_KEYWORDS	gtp-binding	4	3.77358	0.267648	GNAI2, RHOB, TUBA1B, TUBA1C	106	329	19235	2.20623	1	0.831159	98.0868
GOTERM_MF_FAT	GO:0005525~GTP binding	4	3.77358	0.410962	GNAI2, RHOB, TUBA1B, TUBA1C	82	372	12983	1.70247	1	0.974943	99.8699
GOTERM_MF_FAT	GO:0032561~guanyl ribonucleotide binding	4	3.77358	0.427702	GNAI2, RHOB, TUBA1B, TUBA1C	82	382	12983	1.6579	1	0.970489	99.9094
GOTERM_MF_FAT	GO:0019001~guanyl nucleotide binding	4	3.77358	0.427702	GNAI2, RHOB, TUBA1B, TUBA1C	82	382	12983	1.6579	1	0.970489	99.9094
Annotation Cluster 24	Enrichment Score: 0.5466451513185303
Category	Term	Count	%	PValue	Genes	List Total	Pop Hits	Pop Total	Fold Enrichment	Bonferroni	Benjamini	FDR
GOTERM_BP_FAT	GO:0009416~response to light stimulus	3	2.83019	0.192744	FOS, ERCC5, DUSP1	80	138	13528	3.67609	1	0.932106	96.2702
GOTERM_BP_FAT	GO:0009314~response to radiation	3	2.83019	0.326372	FOS, ERCC5, DUSP1	80	200	13528	2.5365	1	0.980189	99.7685
GOTERM_BP_FAT	GO:0009628~response to abiotic stimulus	4	3.77358	0.364226	FOS, ERCC5, DUSP1, BTG2	80	368	13528	1.83804	1	0.980069	99.9048
Annotation Cluster 25	Enrichment Score: 0.5247377831032218
Category	Term	Count	%	PValue	Genes	List Total	Pop Hits	Pop Total	Fold Enrichment	Bonferroni	Benjamini	FDR
GOTERM_MF_FAT	GO:0003690~double-stranded DNA binding	3	2.83019	0.122698	KLF6, FOS, ERCC5	82	97	12983	4.89678	1	0.869194	80.6681
GOTERM_MF_FAT	GO:0043566~structure-specific DNA binding	3	2.83019	0.228893	KLF6, FOS, ERCC5	82	145	12983	3.27578	1	0.92758	96.1735
SP_PIR_KEYWORDS	dna-binding	7	6.60377	0.949115	HMGN1, KLF6, FOS, ERCC5, RUNX1T1, NFE2L2, ENO1	106	1868	19235	0.679998	1	0.999983	100
Annotation Cluster 26	Enrichment Score: 0.5212585738039377
Category	Term	Count	%	PValue	Genes	List Total	Pop Hits	Pop Total	Fold Enrichment	Bonferroni	Benjamini	FDR
GOTERM_BP_FAT	GO:0006928~cell motion	7	6.60377	0.0589083	VCAM1, ACTB, ENPP2, VIM, TPM1, MYH10, S100A2	80	475	13528	2.492	1	0.723237	60.6464
GOTERM_BP_FAT	GO:0016477~cell migration	3	2.83019	0.481453	VCAM1, MYH10, S100A2	80	276	13528	1.83804	1	0.991771	99.9958
GOTERM_BP_FAT	GO:0051674~localization of cell	3	2.83019	0.538416	VCAM1, MYH10, S100A2	80	307	13528	1.65244	1	0.995714	99.9993
GOTERM_BP_FAT	GO:0048870~cell motility	3	2.83019	0.538416	VCAM1, MYH10, S100A2	80	307	13528	1.65244	1	0.995714	99.9993
Annotation Cluster 27	Enrichment Score: 0.4883775419200352
Category	Term	Count	%	PValue	Genes	List Total	Pop Hits	Pop Total	Fold Enrichment	Bonferroni	Benjamini	FDR
GOTERM_CC_FAT	GO:0015630~microtubule cytoskeleton	6	5.66038	0.204132	PBXIP1, NPM1, DCTN6, TUBA1B, TUBA1C, MYH10	74	549	12782	1.88776	1	0.759974	94.5899
SP_PIR_KEYWORDS	microtubule	3	2.83019	0.360099	PBXIP1, TUBA1B, TUBA1C	106	231	19235	2.35665	1	0.911252	99.6553
GOTERM_CC_FAT	GO:0005874~microtubule	3	2.83019	0.46616	PBXIP1, TUBA1B, TUBA1C	74	274	12782	1.8912	1	0.923288	99.9671
Annotation Cluster 28	Enrichment Score: 0.46656618456905263
Category	Term	Count	%	PValue	Genes	List Total	Pop Hits	Pop Total	Fold Enrichment	Bonferroni	Benjamini	FDR
SP_PIR_KEYWORDS	nadp	3	2.83019	0.209474	DHRS3, GMPR2, AKR1A1	106	156	19235	3.48966	1	0.757528	94.9487
SP_PIR_KEYWORDS	oxidoreductase	5	4.71698	0.368199	DHRS3, GMPR2, AKR1A1, NDUFC2, LOXL1	106	562	19235	1.61443	1	0.911989	99.7068
GOTERM_BP_FAT	GO:0055114~oxidation reduction	5	4.71698	0.516522	DHRS3, GMPR2, AKR1A1, NDUFC2, LOXL1	80	639	13528	1.32316	1	0.99432	99.9986
Annotation Cluster 29	Enrichment Score: 0.40592654737368167
Category	Term	Count	%	PValue	Genes	List Total	Pop Hits	Pop Total	Fold Enrichment	Bonferroni	Benjamini	FDR
GOTERM_MF_FAT	GO:0019901~protein kinase binding	3	2.83019	0.233501	ACTB, VIM, PRKCDBP	82	147	12983	3.23121	1	0.922534	96.4509
GOTERM_MF_FAT	GO:0019900~kinase binding	3	2.83019	0.307515	ACTB, VIM, PRKCDBP	82	179	12983	2.65356	1	0.948653	99.0081
GOTERM_MF_FAT	GO:0019899~enzyme binding	3	2.83019	0.843461	ACTB, VIM, PRKCDBP	82	523	12983	0.908198	1	0.999654	100
Annotation Cluster 30	Enrichment Score: 0.39792081374218763
Category	Term	Count	%	PValue	Genes	List Total	Pop Hits	Pop Total	Fold Enrichment	Bonferroni	Benjamini	FDR
GOTERM_BP_FAT	GO:0032989~cellular component morphogenesis	5	4.71698	0.201861	ACTB, S100A6, ACTC1, TPM1, MYH10	80	397	13528	2.12972	1	0.933174	96.8673
GOTERM_BP_FAT	GO:0007409~axonogenesis	3	2.83019	0.311319	ACTB, S100A6, MYH10	80	193	13528	2.6285	1	0.977537	99.675
GOTERM_BP_FAT	GO:0048667~cell morphogenesis involved in neuron differentiation	3	2.83019	0.345603	ACTB, S100A6, MYH10	80	209	13528	2.42727	1	0.981884	99.8516
GOTERM_BP_FAT	GO:0048812~neuron projection morphogenesis	3	2.83019	0.354097	ACTB, S100A6, MYH10	80	213	13528	2.38169	1	0.979855	99.8786
GOTERM_BP_FAT	GO:0030030~cell projection organization	4	3.77358	0.364226	ACTB, S100A6, TPM1, MYH10	80	368	13528	1.83804	1	0.980069	99.9048
GOTERM_BP_FAT	GO:0000904~cell morphogenesis involved in differentiation	3	2.83019	0.418467	ACTB, S100A6, MYH10	80	244	13528	2.0791	1	0.98829	99.9758
GOTERM_BP_FAT	GO:0048858~cell projection morphogenesis	3	2.83019	0.420494	ACTB, S100A6, MYH10	80	245	13528	2.07061	1	0.987555	99.9771
GOTERM_BP_FAT	GO:0032990~cell part morphogenesis	3	2.83019	0.442547	ACTB, S100A6, MYH10	80	256	13528	1.98164	1	0.989086	99.9874
GOTERM_BP_FAT	GO:0031175~neuron projection development	3	2.83019	0.442547	ACTB, S100A6, MYH10	80	256	13528	1.98164	1	0.989086	99.9874
GOTERM_BP_FAT	GO:0030182~neuron differentiation	4	3.77358	0.473648	ACTB, S100A6, BTG2, MYH10	80	438	13528	1.54429	1	0.991952	99.9948
GOTERM_BP_FAT	GO:0048666~neuron development	3	2.83019	0.592637	ACTB, S100A6, MYH10	80	339	13528	1.49646	1	0.997683	99.9999
GOTERM_BP_FAT	GO:0000902~cell morphogenesis	3	2.83019	0.619493	ACTB, S100A6, MYH10	80	356	13528	1.425	1	0.998372	100
Annotation Cluster 31	Enrichment Score: 0.3930431984721074
Category	Term	Count	%	PValue	Genes	List Total	Pop Hits	Pop Total	Fold Enrichment	Bonferroni	Benjamini	FDR
GOTERM_CC_FAT	GO:0005789~endoplasmic reticulum membrane	4	3.77358	0.198692	RTN4, SPCS2, KRTCAP2, SEC61G	74	269	12782	2.56847	1	0.759249	94.098
GOTERM_CC_FAT	GO:0042175~nuclear envelope-endoplasmic reticulum network	4	3.77358	0.22091	RTN4, SPCS2, KRTCAP2, SEC61G	74	284	12782	2.43281	1	0.780852	95.8791
GOTERM_CC_FAT	GO:0031090~organelle membrane	9	8.49057	0.28714	RTN4, SEC31A, NDUFC2, DENND1A, RHOB, SPCS2, KRTCAP2, VPS33B, SEC61G	74	1096	12782	1.4184	1	0.815913	98.6754
GOTERM_CC_FAT	GO:0012505~endomembrane system	7	6.60377	0.28802	RTN4, S100A6, SEC31A, DENND1A, SPCS2, KRTCAP2, SEC61G	74	782	12782	1.54617	1	0.810165	98.6962
GOTERM_CC_FAT	GO:0044432~endoplasmic reticulum part	4	3.77358	0.318268	RTN4, SPCS2, KRTCAP2, SEC61G	74	347	12782	1.99112	1	0.834016	99.2512
SP_PIR_KEYWORDS	endoplasmic reticulum	5	4.71698	0.549037	RTN4, SEC31A, SPCS2, KDELR1, SEC61G	106	713	19235	1.27253	1	0.976641	99.996
GOTERM_CC_FAT	GO:0005783~endoplasmic reticulum	6	5.66038	0.649528	RTN4, SEC31A, SPCS2, KRTCAP2, KDELR1, SEC61G	74	960	12782	1.07956	1	0.976354	99.9998
UP_SEQ_FEATURE	topological domain:Lumenal	3	2.83019	0.704422	RTN4, SPCS2, KDELR1	106	444	19113	1.21832	1	1	100
UP_SEQ_FEATURE	topological domain:Cytoplasmic	8	7.54717	0.999713	RTN4, VCAM1, ATP1B3, TSPAN6, SPCS2, KDELR1, SEC61G, PMEPA1	106	3374	19113	0.427531	1	1	100
Annotation Cluster 32	Enrichment Score: 0.3807446221838491
Category	Term	Count	%	PValue	Genes	List Total	Pop Hits	Pop Total	Fold Enrichment	Bonferroni	Benjamini	FDR
GOTERM_CC_FAT	GO:0000267~cell fraction	9	8.49057	0.27619	ACTB, FOS, ACTC1, TALDO1, GNAI2, YWHAQ, RHOB, SPCS2, KDELR1	74	1083	12782	1.43543	1	0.808499	98.3907
GOTERM_CC_FAT	GO:0005624~membrane fraction	6	5.66038	0.494671	FOS, TALDO1, GNAI2, RHOB, SPCS2, KDELR1	74	809	12782	1.28106	1	0.935583	99.9837
GOTERM_CC_FAT	GO:0005626~insoluble fraction	6	5.66038	0.527523	FOS, TALDO1, GNAI2, RHOB, SPCS2, KDELR1	74	839	12782	1.23525	1	0.945447	99.9931
Annotation Cluster 33	Enrichment Score: 0.3789364658922547
Category	Term	Count	%	PValue	Genes	List Total	Pop Hits	Pop Total	Fold Enrichment	Bonferroni	Benjamini	FDR
INTERPRO	IPR019782:WD40 repeat 2	3	2.83019	0.365308	WSB1, SEC31A, EIF3I	95	226	16659	2.32776	1	0.999939	99.7115
UP_SEQ_FEATURE	repeat:WD 5	3	2.83019	0.366955	WSB1, SEC31A, EIF3I	106	233	19113	2.3216	1	0.999996	99.8101
INTERPRO	IPR017986:WD40 repeat, region	3	2.83019	0.389503	WSB1, SEC31A, EIF3I	95	238	16659	2.21039	1	0.999936	99.825
INTERPRO	IPR019781:WD40 repeat, subgroup	3	2.83019	0.397481	WSB1, SEC31A, EIF3I	95	242	16659	2.17386	1	0.999895	99.8523
UP_SEQ_FEATURE	repeat:WD 4	3	2.83019	0.402083	WSB1, SEC31A, EIF3I	106	251	19113	2.15512	1	0.999998	99.9132
UP_SEQ_FEATURE	repeat:WD 3	3	2.83019	0.428775	WSB1, SEC31A, EIF3I	106	265	19113	2.04126	1	0.999998	99.9536
SMART	SM00320:WD40	3	2.83019	0.433116	WSB1, SEC31A, EIF3I	51	266	9079	2.00774	1	0.998452	99.6398
INTERPRO	IPR001680:WD40 repeat	3	2.83019	0.444297	WSB1, SEC31A, EIF3I	95	266	16659	1.97772	1	0.999948	99.9478
UP_SEQ_FEATURE	repeat:WD 2	3	2.83019	0.445607	WSB1, SEC31A, EIF3I	106	274	19113	1.97421	1	0.999998	99.9692
UP_SEQ_FEATURE	repeat:WD 1	3	2.83019	0.445607	WSB1, SEC31A, EIF3I	106	274	19113	1.97421	1	0.999998	99.9692
SP_PIR_KEYWORDS	wd repeat	3	2.83019	0.446066	WSB1, SEC31A, EIF3I	106	276	19235	1.97242	1	0.949259	99.9448
INTERPRO	IPR019775:WD40 repeat, conserved site	3	2.83019	0.46509	WSB1, SEC31A, EIF3I	95	277	16659	1.89918	1	0.999945	99.968
Annotation Cluster 34	Enrichment Score: 0.35207626362704963
Category	Term	Count	%	PValue	Genes	List Total	Pop Hits	Pop Total	Fold Enrichment	Bonferroni	Benjamini	FDR
GOTERM_BP_FAT	GO:0010033~response to organic substance	7	6.60377	0.244522	FOS, SRRT, ACTC1, DUSP1, BTG2, CSNK2B, NFE2L2	80	721	13528	1.64175	1	0.952478	98.6527
GOTERM_BP_FAT	GO:0009628~response to abiotic stimulus	4	3.77358	0.364226	FOS, ERCC5, DUSP1, BTG2	80	368	13528	1.83804	1	0.980069	99.9048
GOTERM_BP_FAT	GO:0009725~response to hormone stimulus	3	2.83019	0.636147	FOS, DUSP1, BTG2	80	367	13528	1.38229	1	0.998501	100
GOTERM_BP_FAT	GO:0009719~response to endogenous stimulus	3	2.83019	0.689363	FOS, DUSP1, BTG2	80	405	13528	1.25259	1	0.999102	100
Annotation Cluster 35	Enrichment Score: 0.35125658194555165
Category	Term	Count	%	PValue	Genes	List Total	Pop Hits	Pop Total	Fold Enrichment	Bonferroni	Benjamini	FDR
GOTERM_CC_FAT	GO:0044433~cytoplasmic vesicle part	3	2.83019	0.289467	SEC31A, DENND1A, ACTN1	74	187	12782	2.77107	1	0.805241	98.7296
GOTERM_BP_FAT	GO:0016044~membrane organization	4	3.77358	0.384971	SEC31A, DENND1A, VPS33B, MYH10	80	381	13528	1.77533	1	0.983655	99.9428
GOTERM_CC_FAT	GO:0016023~cytoplasmic membrane-bounded vesicle	5	4.71698	0.385084	SEC31A, ATP1B3, DENND1A, ACTN1, VPS33B	74	550	12782	1.57027	1	0.882968	99.7995
GOTERM_CC_FAT	GO:0031988~membrane-bounded vesicle	5	4.71698	0.408585	SEC31A, ATP1B3, DENND1A, ACTN1, VPS33B	74	568	12782	1.52051	1	0.887914	99.8781
GOTERM_CC_FAT	GO:0031410~cytoplasmic vesicle	5	4.71698	0.502834	SEC31A, ATP1B3, DENND1A, ACTN1, VPS33B	74	642	12782	1.34525	1	0.936616	99.9867
GOTERM_CC_FAT	GO:0031982~vesicle	5	4.71698	0.536914	SEC31A, ATP1B3, DENND1A, ACTN1, VPS33B	74	670	12782	1.28903	1	0.946914	99.9946
GOTERM_CC_FAT	GO:0044459~plasma membrane part	12	11.3208	0.734528	VCAM1, PGM5, SEC31A, AKR1A1, ATP1B3, ENPP2, DENND1A, ACTN1, MYH7, VPS33B, TPM1, COG1	74	2203	12782	0.940879	1	0.989856	100
Annotation Cluster 36	Enrichment Score: 0.3415229428394318
Category	Term	Count	%	PValue	Genes	List Total	Pop Hits	Pop Total	Fold Enrichment	Bonferroni	Benjamini	FDR
GOTERM_BP_FAT	GO:0033554~cellular response to stress	6	5.66038	0.235206	FOS, ERCC5, BTG2, NFE2L2, ABL1, TPM1	80	566	13528	1.79258	1	0.947833	98.3736
GOTERM_BP_FAT	GO:0006281~DNA repair	3	2.83019	0.496555	ERCC5, BTG2, ABL1	80	284	13528	1.78627	1	0.993063	99.9974
GOTERM_BP_FAT	GO:0006259~DNA metabolic process	4	3.77358	0.571398	FOS, ERCC5, BTG2, ABL1	80	506	13528	1.33676	1	0.997038	99.9998
GOTERM_BP_FAT	GO:0006974~response to DNA damage stimulus	3	2.83019	0.644992	ERCC5, BTG2, ABL1	80	373	13528	1.36005	1	0.998579	100
Annotation Cluster 37	Enrichment Score: 0.32413185753595775
Category	Term	Count	%	PValue	Genes	List Total	Pop Hits	Pop Total	Fold Enrichment	Bonferroni	Benjamini	FDR
GOTERM_BP_FAT	GO:0008219~cell death	6	5.66038	0.411043	RTN4, PDCL3, ACTC1, UBA1, RBM5, RHOB	80	719	13528	1.41113	1	0.98813	99.9706
GOTERM_BP_FAT	GO:0016265~death	6	5.66038	0.416897	RTN4, PDCL3, ACTC1, UBA1, RBM5, RHOB	80	724	13528	1.40138	1	0.988562	99.9748
GOTERM_BP_FAT	GO:0006915~apoptosis	5	4.71698	0.469537	RTN4, PDCL3, ACTC1, RBM5, RHOB	80	602	13528	1.40449	1	0.992208	99.9941
GOTERM_BP_FAT	GO:0012501~programmed cell death	5	4.71698	0.481119	RTN4, PDCL3, ACTC1, RBM5, RHOB	80	611	13528	1.3838	1	0.992088	99.9958
SP_PIR_KEYWORDS	Apoptosis	3	2.83019	0.618731	PDCL3, RBM5, RHOB	106	381	19235	1.42884	1	0.987212	99.9995
Annotation Cluster 38	Enrichment Score: 0.3095149368495359
Category	Term	Count	%	PValue	Genes	List Total	Pop Hits	Pop Total	Fold Enrichment	Bonferroni	Benjamini	FDR
GOTERM_CC_FAT	GO:0015630~microtubule cytoskeleton	6	5.66038	0.204132	PBXIP1, NPM1, DCTN6, TUBA1B, TUBA1C, MYH10	74	549	12782	1.88776	1	0.759974	94.5899
GOTERM_BP_FAT	GO:0034622~cellular macromolecular complex assembly	4	3.77358	0.284088	NPM1, RBM5, TUBA1B, TUBA1C	80	318	13528	2.12704	1	0.970855	99.4103
GOTERM_BP_FAT	GO:0034621~cellular macromolecular complex subunit organization	4	3.77358	0.346599	NPM1, RBM5, TUBA1B, TUBA1C	80	357	13528	1.89468	1	0.981287	99.8551
GOTERM_BP_FAT	GO:0007017~microtubule-based process	3	2.83019	0.436577	NPM1, TUBA1B, TUBA1C	80	253	13528	2.00514	1	0.988648	99.9851
GOTERM_BP_FAT	GO:0065003~macromolecular complex assembly	4	3.77358	0.7525	NPM1, RBM5, TUBA1B, TUBA1C	80	665	13528	1.01714	1	0.999671	100
GOTERM_BP_FAT	GO:0043933~macromolecular complex subunit organization	4	3.77358	0.791212	NPM1, RBM5, TUBA1B, TUBA1C	80	710	13528	0.952676	1	0.999821	100
GOTERM_BP_FAT	GO:0006461~protein complex assembly	3	2.83019	0.799678	NPM1, TUBA1B, TUBA1C	80	505	13528	1.00455	1	0.999848	100
GOTERM_BP_FAT	GO:0070271~protein complex biogenesis	3	2.83019	0.799678	NPM1, TUBA1B, TUBA1C	80	505	13528	1.00455	1	0.999848	100
Annotation Cluster 39	Enrichment Score: 0.28868685445491044
Category	Term	Count	%	PValue	Genes	List Total	Pop Hits	Pop Total	Fold Enrichment	Bonferroni	Benjamini	FDR
GOTERM_MF_FAT	GO:0016564~transcription repressor activity	4	3.77358	0.315455	PBXIP1, RUNX1T1, SCMH1, ENO1	82	316	12983	2.00417	1	0.947374	99.1418
GOTERM_BP_FAT	GO:0010629~negative regulation of gene expression	5	4.71698	0.339717	SRRT, PBXIP1, YWHAQ, SCMH1, ENO1	80	504	13528	1.67758	1	0.982062	99.8298
GOTERM_BP_FAT	GO:0045934~negative regulation of nucleobase, nucleoside, nucleotide and nucleic acid metabolic process	5	4.71698	0.350411	PBXIP1, NPM1, YWHAQ, SCMH1, ENO1	80	512	13528	1.65137	1	0.980582	99.8675
GOTERM_BP_FAT	GO:0051172~negative regulation of nitrogen compound metabolic process	5	4.71698	0.359776	PBXIP1, NPM1, YWHAQ, SCMH1, ENO1	80	519	13528	1.62909	1	0.98055	99.894
GOTERM_MF_FAT	GO:0008134~transcription factor binding	5	4.71698	0.398602	PBXIP1, ENPP2, NPM1, CSNK2B, ENO1	82	513	12983	1.54317	1	0.974484	99.8311
GOTERM_BP_FAT	GO:0010605~negative regulation of macromolecule metabolic process	6	5.66038	0.428581	SRRT, PBXIP1, NPM1, YWHAQ, SCMH1, ENO1	80	734	13528	1.38229	1	0.988378	99.9815
GOTERM_BP_FAT	GO:0016481~negative regulation of transcription	4	3.77358	0.504939	PBXIP1, YWHAQ, SCMH1, ENO1	80	459	13528	1.47364	1	0.993572	99.998
GOTERM_BP_FAT	GO:0010558~negative regulation of macromolecule biosynthetic process	4	3.77358	0.624793	PBXIP1, YWHAQ, SCMH1, ENO1	80	547	13528	1.23656	1	0.998435	100
GOTERM_BP_FAT	GO:0051253~negative regulation of RNA metabolic process	3	2.83019	0.628647	NPM1, YWHAQ, ENO1	80	362	13528	1.40138	1	0.998376	100
GOTERM_BP_FAT	GO:0031327~negative regulation of cellular biosynthetic process	4	3.77358	0.641978	PBXIP1, YWHAQ, SCMH1, ENO1	80	561	13528	1.2057	1	0.998576	100
GOTERM_BP_FAT	GO:0009890~negative regulation of biosynthetic process	4	3.77358	0.656274	PBXIP1, YWHAQ, SCMH1, ENO1	80	573	13528	1.18045	1	0.998779	100
GOTERM_MF_FAT	GO:0003712~transcription cofactor activity	3	2.83019	0.666067	PBXIP1, NPM1, ENO1	82	363	12983	1.30851	1	0.997063	99.9999
GOTERM_MF_FAT	GO:0030528~transcription regulator activity	9	8.49057	0.74108	HMGN1, KLF6, FOS, PBXIP1, NPM1, RUNX1T1, NFE2L2, SCMH1, ENO1	82	1512	12983	0.942436	1	0.998495	100
GOTERM_BP_FAT	GO:0045449~regulation of transcription	11	10.3774	0.954504	KLF6, FOS, PBXIP1, BTG2, NPM1, RUNX1T1, YWHAQ, NFE2L2, ABL1, SCMH1, ENO1	80	2601	13528	0.715148	1	1	100
Annotation Cluster 40	Enrichment Score: 0.23471235014169908
Category	Term	Count	%	PValue	Genes	List Total	Pop Hits	Pop Total	Fold Enrichment	Bonferroni	Benjamini	FDR
SP_PIR_KEYWORDS	ubl conjugation pathway	5	4.71698	0.302457	WSB1, UBA1, ZRANB1, UBE2F, PMEPA1	106	509	19235	1.78254	1	0.865224	98.9693
GOTERM_BP_FAT	GO:0006508~proteolysis	8	7.54717	0.419572	WSB1, CAPNS1, UBA1, ZRANB1, CPXM2, UBE2F, C4BPA, SPCS2	80	1054	13528	1.28349	1	0.98794	99.9765
GOTERM_BP_FAT	GO:0044265~cellular macromolecule catabolic process	5	4.71698	0.617722	WSB1, ERCC5, UBA1, ZRANB1, UBE2F	80	725	13528	1.16621	1	0.998408	100
GOTERM_BP_FAT	GO:0019941~modification-dependent protein catabolic process	4	3.77358	0.657447	WSB1, UBA1, ZRANB1, UBE2F	80	574	13528	1.1784	1	0.998741	100
GOTERM_BP_FAT	GO:0043632~modification-dependent macromolecule catabolic process	4	3.77358	0.657447	WSB1, UBA1, ZRANB1, UBE2F	80	574	13528	1.1784	1	0.998741	100
GOTERM_BP_FAT	GO:0009057~macromolecule catabolic process	5	4.71698	0.676287	WSB1, ERCC5, UBA1, ZRANB1, UBE2F	80	781	13528	1.08259	1	0.999015	100
GOTERM_BP_FAT	GO:0051603~proteolysis involved in cellular protein catabolic process	4	3.77358	0.686962	WSB1, UBA1, ZRANB1, UBE2F	80	600	13528	1.12733	1	0.999107	100
GOTERM_BP_FAT	GO:0044257~cellular protein catabolic process	4	3.77358	0.690245	WSB1, UBA1, ZRANB1, UBE2F	80	603	13528	1.12172	1	0.999069	100
GOTERM_BP_FAT	GO:0030163~protein catabolic process	4	3.77358	0.710454	WSB1, UBA1, ZRANB1, UBE2F	80	622	13528	1.08746	1	0.999343	100
Annotation Cluster 41	Enrichment Score: 0.1752605847628421
Category	Term	Count	%	PValue	Genes	List Total	Pop Hits	Pop Total	Fold Enrichment	Bonferroni	Benjamini	FDR
GOTERM_CC_FAT	GO:0005578~proteinaceous extracellular matrix	3	2.83019	0.549084	LAMA4, SPARCL1, LOXL1	74	320	12782	1.61934	1	0.94955	99.9962
GOTERM_CC_FAT	GO:0031012~extracellular matrix	3	2.83019	0.590308	LAMA4, SPARCL1, LOXL1	74	345	12782	1.502	1	0.960772	99.9989
GOTERM_CC_FAT	GO:0044421~extracellular region part	4	3.77358	0.919391	VCAM1, LAMA4, SPARCL1, LOXL1	74	960	12782	0.719707	1	0.999695	100
Annotation Cluster 42	Enrichment Score: 0.1402562570104888
Category	Term	Count	%	PValue	Genes	List Total	Pop Hits	Pop Total	Fold Enrichment	Bonferroni	Benjamini	FDR
GOTERM_BP_FAT	GO:0043065~positive regulation of apoptosis	3	2.83019	0.720826	DUSP1, RBM5, ABL1	80	430	13528	1.17977	1	0.99944	100
GOTERM_BP_FAT	GO:0043068~positive regulation of programmed cell death	3	2.83019	0.724419	DUSP1, RBM5, ABL1	80	433	13528	1.17159	1	0.999452	100
GOTERM_BP_FAT	GO:0010942~positive regulation of cell death	3	2.83019	0.726793	DUSP1, RBM5, ABL1	80	435	13528	1.16621	1	0.99945	100
Annotation Cluster 43	Enrichment Score: 0.1114749094499841
Category	Term	Count	%	PValue	Genes	List Total	Pop Hits	Pop Total	Fold Enrichment	Bonferroni	Benjamini	FDR
GOTERM_BP_FAT	GO:0006793~phosphorus metabolic process	6	5.66038	0.680167	DUSP1, GNAI2, ENPP2, NDUFC2, CLK1, ABL1	80	973	13528	1.04275	1	0.999035	100
GOTERM_BP_FAT	GO:0006796~phosphate metabolic process	6	5.66038	0.680167	DUSP1, GNAI2, ENPP2, NDUFC2, CLK1, ABL1	80	973	13528	1.04275	1	0.999035	100
GOTERM_BP_FAT	GO:0016310~phosphorylation	4	3.77358	0.853831	GNAI2, NDUFC2, CLK1, ABL1	80	800	13528	0.8455	1	0.999962	100
GOTERM_BP_FAT	GO:0006468~protein amino acid phosphorylation	3	2.83019	0.906771	GNAI2, CLK1, ABL1	80	667	13528	0.76057	1	0.999994	100
Annotation Cluster 44	Enrichment Score: 0.08382366736497372
Category	Term	Count	%	PValue	Genes	List Total	Pop Hits	Pop Total	Fold Enrichment	Bonferroni	Benjamini	FDR
GOTERM_MF_FAT	GO:0016564~transcription repressor activity	4	3.77358	0.315455	PBXIP1, RUNX1T1, SCMH1, ENO1	82	316	12983	2.00417	1	0.947374	99.1418
GOTERM_MF_FAT	GO:0016563~transcription activator activity	3	2.83019	0.730287	KLF6, NPM1, NFE2L2	82	410	12983	1.15851	1	0.998663	100
GOTERM_MF_FAT	GO:0003700~transcription factor activity	6	5.66038	0.737304	KLF6, FOS, RUNX1T1, NFE2L2, SCMH1, ENO1	82	975	12983	0.974334	1	0.99862	100
GOTERM_MF_FAT	GO:0030528~transcription regulator activity	9	8.49057	0.74108	HMGN1, KLF6, FOS, PBXIP1, NPM1, RUNX1T1, NFE2L2, SCMH1, ENO1	82	1512	12983	0.942436	1	0.998495	100
GOTERM_BP_FAT	GO:0031328~positive regulation of cellular biosynthetic process	4	3.77358	0.770356	KLF6, FOS, NPM1, NFE2L2	80	685	13528	0.987445	1	0.999759	100
GOTERM_BP_FAT	GO:0045893~positive regulation of transcription, DNA-dependent	3	2.83019	0.772822	KLF6, FOS, NFE2L2	80	477	13528	1.06352	1	0.999759	100
GOTERM_BP_FAT	GO:0051254~positive regulation of RNA metabolic process	3	2.83019	0.776839	KLF6, FOS, NFE2L2	80	481	13528	1.05468	1	0.999769	100
GOTERM_BP_FAT	GO:0009891~positive regulation of biosynthetic process	4	3.77358	0.778891	KLF6, FOS, NPM1, NFE2L2	80	695	13528	0.973237	1	0.999768	100
GOTERM_BP_FAT	GO:0006357~regulation of transcription from RNA polymerase II promoter	4	3.77358	0.804495	KLF6, FOS, ABL1, ENO1	80	727	13528	0.930399	1	0.999859	100
GOTERM_BP_FAT	GO:0045941~positive regulation of transcription	3	2.83019	0.847342	KLF6, FOS, NFE2L2	80	564	13528	0.899468	1	0.999961	100
GOTERM_BP_FAT	GO:0051252~regulation of RNA metabolic process	9	8.49057	0.847802	KLF6, FOS, NPM1, RBM5, RUNX1T1, YWHAQ, NFE2L2, ABL1, ENO1	80	1813	13528	0.839437	1	0.999959	100
GOTERM_BP_FAT	GO:0010628~positive regulation of gene expression	3	2.83019	0.859055	KLF6, FOS, NFE2L2	80	581	13528	0.87315	1	0.999966	100
GOTERM_BP_FAT	GO:0045935~positive regulation of nucleobase, nucleoside, nucleotide and nucleic acid metabolic process	3	2.83019	0.885152	KLF6, FOS, NFE2L2	80	624	13528	0.812981	1	0.999987	100
GOTERM_BP_FAT	GO:0051173~positive regulation of nitrogen compound metabolic process	3	2.83019	0.895722	KLF6, FOS, NFE2L2	80	644	13528	0.787733	1	0.999991	100
GOTERM_BP_FAT	GO:0010557~positive regulation of macromolecule biosynthetic process	3	2.83019	0.900666	KLF6, FOS, NFE2L2	80	654	13528	0.775688	1	0.999993	100
SP_PIR_KEYWORDS	transcription regulation	8	7.54717	0.935087	KLF6, FOS, DPY30, BTG2, RUNX1T1, NFE2L2, SCMH1, ENO1	106	2026	19235	0.716534	1	0.999964	100
SP_PIR_KEYWORDS	dna-binding	7	6.60377	0.949115	HMGN1, KLF6, FOS, ERCC5, RUNX1T1, NFE2L2, ENO1	106	1868	19235	0.679998	1	0.999983	100
GOTERM_BP_FAT	GO:0045449~regulation of transcription	11	10.3774	0.954504	KLF6, FOS, PBXIP1, BTG2, NPM1, RUNX1T1, YWHAQ, NFE2L2, ABL1, SCMH1, ENO1	80	2601	13528	0.715148	1	1	100
GOTERM_BP_FAT	GO:0006355~regulation of transcription, DNA-dependent	7	6.60377	0.956663	KLF6, FOS, RUNX1T1, YWHAQ, NFE2L2, ABL1, ENO1	80	1773	13528	0.667625	1	1	100
GOTERM_BP_FAT	GO:0010604~positive regulation of macromolecule metabolic process	3	2.83019	0.964318	KLF6, FOS, NFE2L2	80	857	13528	0.591949	1	1	100
GOTERM_MF_FAT	GO:0003677~DNA binding	10	9.43396	0.966953	HMGN1, KLF6, FOS, ERCC5, RBM5, RUNX1T1, NFE2L2, ABL1, SCMH1, ENO1	82	2331	12983	0.679233	1	0.999999	100
SP_PIR_KEYWORDS	Transcription	7	6.60377	0.975344	KLF6, DPY30, BTG2, RUNX1T1, NFE2L2, SCMH1, ENO1	106	2071	19235	0.613344	1	0.999998	100
GOTERM_BP_FAT	GO:0006350~transcription	6	5.66038	0.996305	KLF6, BTG2, RUNX1T1, NFE2L2, SCMH1, ENO1	80	2101	13528	0.482913	1	1	100
Annotation Cluster 45	Enrichment Score: 0.047999753177705454
Category	Term	Count	%	PValue	Genes	List Total	Pop Hits	Pop Total	Fold Enrichment	Bonferroni	Benjamini	FDR
GOTERM_MF_FAT	GO:0046872~metal ion binding	24	22.6415	0.785434	MYL6, KLF6, S100A6, CAPNS1, GMPR2, ATP1B3, ENPP2, SPARCL1, RBM5, RUNX1T1, ACTN1, CPXM2, ANXA4, ERCC5, PGM5, CALML4, HEBP1, U2AF1, ZRANB1, ABL1, LOXL1, S100A2, INO80B, ENO1	82	4140	12983	0.917851	1	0.999146	100
GOTERM_MF_FAT	GO:0043169~cation binding	24	22.6415	0.801853	MYL6, KLF6, S100A6, CAPNS1, GMPR2, ATP1B3, ENPP2, SPARCL1, RBM5, RUNX1T1, ACTN1, CPXM2, ANXA4, ERCC5, PGM5, CALML4, HEBP1, U2AF1, ZRANB1, ABL1, LOXL1, S100A2, INO80B, ENO1	82	4179	12983	0.909285	1	0.999301	100
GOTERM_MF_FAT	GO:0043167~ion binding	24	22.6415	0.826244	MYL6, KLF6, S100A6, CAPNS1, GMPR2, ATP1B3, ENPP2, SPARCL1, RBM5, RUNX1T1, ACTN1, CPXM2, ANXA4, ERCC5, PGM5, CALML4, HEBP1, U2AF1, ZRANB1, ABL1, LOXL1, S100A2, INO80B, ENO1	82	4241	12983	0.895992	1	0.99954	100
SP_PIR_KEYWORDS	metal-binding	14	13.2075	0.843767	KLF6, S100A6, GMPR2, ENPP2, RUNX1T1, RBM5, ERCC5, PGM5, U2AF1, ZRANB1, ABL1, LOXL1, INO80B, ENO1	106	2972	19235	0.854802	1	0.999424	100
SP_PIR_KEYWORDS	zinc-finger	6	5.66038	0.963384	KLF6, U2AF1, RBM5, RUNX1T1, ZRANB1, INO80B	106	1718	19235	0.633745	1	0.999994	100
GOTERM_MF_FAT	GO:0046914~transition metal ion binding	11	10.3774	0.988081	KLF6, S100A6, HEBP1, U2AF1, RBM5, RUNX1T1, ZRANB1, CPXM2, ABL1, LOXL1, INO80B	82	2785	12983	0.625358	1	1	100
GOTERM_MF_FAT	GO:0008270~zinc ion binding	8	7.54717	0.993716	KLF6, S100A6, U2AF1, RBM5, RUNX1T1, ZRANB1, CPXM2, INO80B	82	2311	12983	0.548089	1	1	100
SP_PIR_KEYWORDS	zinc	6	5.66038	0.994517	KLF6, U2AF1, RBM5, RUNX1T1, ZRANB1, INO80B	106	2189	19235	0.497384	1	1	100
Annotation Cluster 46	Enrichment Score: 0.046916674016988624
Category	Term	Count	%	PValue	Genes	List Total	Pop Hits	Pop Total	Fold Enrichment	Bonferroni	Benjamini	FDR
SP_PIR_KEYWORDS	Secreted	10	9.43396	0.580609	C10ORF57, LAMA4, ENPP2, SPARCL1, CSNK2B, CPXM2, LRRC17, C4BPA, LOXL1, PLAC9	106	1689	19235	1.07438	1	0.981902	99.9984
GOTERM_CC_FAT	GO:0005576~extracellular region	11	10.3774	0.730944	VCAM1, C10ORF57, LAMA4, ENPP2, SPARCL1, CSNK2B, CPXM2, ACTN1, C4BPA, LOXL1, PLAC9	74	2010	12782	0.945287	1	0.990102	100
GOTERM_CC_FAT	GO:0044421~extracellular region part	4	3.77358	0.919391	VCAM1, LAMA4, SPARCL1, LOXL1	74	960	12782	0.719707	1	0.999695	100
SP_PIR_KEYWORDS	signal	11	10.3774	0.988972	VCAM1, C10ORF57, LAMA4, ENPP2, SPARCL1, CSNK2B, CPXM2, LRRC17, C4BPA, LOXL1, PLAC9	106	3250	19235	0.61418	1	1	100
UP_SEQ_FEATURE	signal peptide	11	10.3774	0.989745	VCAM1, C10ORF57, LAMA4, ENPP2, SPARCL1, CSNK2B, CPXM2, LRRC17, C4BPA, LOXL1, PLAC9	106	3250	19113	0.610284	1	1	100
SP_PIR_KEYWORDS	disulfide bond	9	8.49057	0.993667	VCAM1, LAMA4, ATP1B3, ENPP2, SPARCL1, NPM1, CSNK2B, CPXM2, C4BPA	106	2924	19235	0.558536	1	1	100
UP_SEQ_FEATURE	disulfide bond	8	7.54717	0.996703	VCAM1, LAMA4, ATP1B3, ENPP2, SPARCL1, CSNK2B, CPXM2, C4BPA	106	2819	19113	0.511703	1	1	100
SP_PIR_KEYWORDS	glycoprotein	10	9.43396	0.999954	VCAM1, LAMA4, ATP1B3, ENPP2, SPARCL1, TSPAN6, CSNK2B, CPXM2, C4BPA, ANXA4	106	4318	19235	0.420246	1	1	100
UP_SEQ_FEATURE	glycosylation site:N-linked (GlcNAc...)	9	8.49057	0.999972	VCAM1, LAMA4, ATP1B3, ENPP2, SPARCL1, TSPAN6, CSNK2B, CPXM2, C4BPA	106	4129	19113	0.393025	1	1	100
Annotation Cluster 47	Enrichment Score: 9.270817666164494E-4
Category	Term	Count	%	PValue	Genes	List Total	Pop Hits	Pop Total	Fold Enrichment	Bonferroni	Benjamini	FDR
SP_PIR_KEYWORDS	membrane	25	23.5849	0.988838	RTN4, S100A6, SEC31A, ATP1B3, TSPAN6, VPS33B, VCAM1, RHOB, KDELR1, MANBAL, TMEM14C, ENO1, C10ORF57, CAPNS1, TMEM93, NDUFC2, DENND1A, KRTCAP2, DHRS3, SPCS2, LGTN, ABL1, SEC61G, PMEPA1, COG1	106	6256	19235	0.725153	1	1	100
UP_SEQ_FEATURE	transmembrane region	15	14.1509	0.999361	RTN4, C10ORF57, ATP1B3, TMEM93, TSPAN6, NDUFC2, KRTCAP2, VCAM1, DHRS3, SPCS2, MANBAL, KDELR1, TMEM14C, PMEPA1, SEC61G	106	4911	19113	0.550737	1	1	100
SP_PIR_KEYWORDS	transmembrane	15	14.1509	0.999435	RTN4, C10ORF57, ATP1B3, TMEM93, TSPAN6, NDUFC2, KRTCAP2, VCAM1, DHRS3, SPCS2, MANBAL, KDELR1, TMEM14C, PMEPA1, SEC61G	106	4973	19235	0.547342	1	1	100
UP_SEQ_FEATURE	topological domain:Cytoplasmic	8	7.54717	0.999713	RTN4, VCAM1, ATP1B3, TSPAN6, SPCS2, KDELR1, SEC61G, PMEPA1	106	3374	19113	0.427531	1	1	100
GOTERM_CC_FAT	GO:0031224~intrinsic to membrane	17	16.0377	0.999952	RTN4, C10ORF57, ATP1B3, ENPP2, TMEM93, TSPAN6, NDUFC2, KRTCAP2, VCAM1, DHRS3, RHOB, SPCS2, MANBAL, KDELR1, TMEM14C, PMEPA1, SEC61G	74	5485	12782	0.535352	1	1	100
GOTERM_CC_FAT	GO:0016021~integral to membrane	16	15.0943	0.999956	RTN4, C10ORF57, ATP1B3, ENPP2, TMEM93, TSPAN6, NDUFC2, KRTCAP2, VCAM1, DHRS3, SPCS2, MANBAL, KDELR1, TMEM14C, PMEPA1, SEC61G	74	5297	12782	0.521744	1	1	100
