# Supplementary material for: Systems Biology Approach to the Dissection of the Complexity of Regulatory Networks in the S. scrofa Cardiocirculatory System
Source: MDPI journal article supplement (doi:10.3390/ijms141123160), 2013-11-21
Supplement: s6 [file s6]

## Sheet: Supplementary Table S5.txt
Annotation Cluster 1	Enrichment Score: 1.6234943323183633
Category	Term	Count	%	PValue	Genes	List Total	Pop Hits	Pop Total	Fold Enrichment	Bonferroni	Benjamini	FDR
GOTERM_BP_FAT	GO:0016044~membrane organization	13	6.87831	0.000768307	LY75, STX8, PLDN, SEC31A, LDLR, RABEPK, PI4KB, TRIM72, RABEP2, PIKFYVE, CAP1, IZUMO1, MYH10	145	381	13528	3.18335	0.570971	0.570971	1.22173
GOTERM_BP_FAT	GO:0016192~vesicle-mediated transport	16	8.46561	0.00122096	LY75, STX8, PLDN, SEC31A, LDLR, GOLT1B, AP3S1, RABEPK, PI4KB, TRIM72, RABEP2, PIKFYVE, CPNE1, RHOB, CAP1, MYH10	145	576	13528	2.59157	0.739487	0.36133	1.93497
GOTERM_BP_FAT	GO:0006898~receptor-mediated endocytosis	4	2.1164	0.0187783	PIKFYVE, RABEPK, PI4KB, CAP1	145	53	13528	7.04125	1	0.94929	26.1537
GOTERM_CC_FAT	GO:0044440~endosomal part	4	2.1164	0.0205922	LDLR, PIKFYVE, RABEPK, RHOB	132	57	12782	6.79532	0.99597	0.99597	23.8741
GOTERM_CC_FAT	GO:0010008~endosome membrane	4	2.1164	0.0205922	LDLR, PIKFYVE, RABEPK, RHOB	132	57	12782	6.79532	0.99597	0.99597	23.8741
GOTERM_BP_FAT	GO:0010324~membrane invagination	7	3.7037	0.0302714	LY75, RABEP2, LDLR, PIKFYVE, RABEPK, PI4KB, CAP1	145	220	13528	2.96853	1	0.966101	38.8366
GOTERM_BP_FAT	GO:0006897~endocytosis	7	3.7037	0.0302714	LY75, RABEP2, LDLR, PIKFYVE, RABEPK, PI4KB, CAP1	145	220	13528	2.96853	1	0.966101	38.8366
GOTERM_CC_FAT	GO:0005768~endosome	7	3.7037	0.105029	PLDN, RABEP2, LDLR, PIKFYVE, RABEPK, RHOB, PI4KB	132	315	12782	2.15185	1	0.706311	76.654
SP_PIR_KEYWORDS	Endocytosis	3	1.5873	0.241372	LY75, RABEP2, LDLR	189	96	19235	3.18039	1	0.991444	97.4731
SP_PIR_KEYWORDS	endosome	4	2.1164	0.335502	RABEP2, PIKFYVE, RABEPK, RHOB	189	209	19235	1.9478	1	0.990008	99.567
Annotation Cluster 2	Enrichment Score: 1.4887570231423488
Category	Term	Count	%	PValue	Genes	List Total	Pop Hits	Pop Total	Fold Enrichment	Bonferroni	Benjamini	FDR
GOTERM_BP_FAT	GO:0030029~actin filament-based process	10	5.29101	0.00110046	MYL6, TLN1, PDLIM3, AMOT, ACTN1, CNN1, CAP1, ARHGAP26, MYH10, DSTN	145	241	13528	3.87123	0.702479	0.454545	1.74556
GOTERM_BP_FAT	GO:0030036~actin cytoskeleton organization	9	4.7619	0.00288596	TLN1, PDLIM3, AMOT, ACTN1, CNN1, CAP1, ARHGAP26, MYH10, DSTN	145	226	13528	3.71535	0.958499	0.548648	4.5171
SP_PIR_KEYWORDS	actin binding	4	2.1164	0.00696087	TAGLN, ACTN1, CNN1, DSTN	189	40	19235	10.1772	0.870835	0.494507	8.88132
SMART	SM00033:CH	4	2.1164	0.0357519	TAGLN, ACTN1, CNN1, EHBP1L1	95	70	9079	5.46105	0.987334	0.987334	34.1587
INTERPRO	IPR001715:Calponin-like actin-binding	4	2.1164	0.0357851	TAGLN, ACTN1, CNN1, EHBP1L1	173	70	16659	5.50256	1	1	40.4366
GOTERM_BP_FAT	GO:0007010~cytoskeleton organization	10	5.29101	0.0434427	TLN1, PDLIM3, AMOT, ACTN1, CNN1, KRT4, CAP1, ARHGAP26, MYH10, DSTN	145	436	13528	2.13983	1	0.983008	50.8524
GOTERM_CC_FAT	GO:0015629~actin cytoskeleton	7	3.7037	0.0584426	MYL6, PGM5, PDLIM3, AMOT, CAP1, MYH10, DSTN	132	269	12782	2.51983	1	0.735485	54.592
UP_SEQ_FEATURE	domain:CH	3	1.5873	0.0641265	TAGLN, CNN1, EHBP1L1	189	42	19113	7.22336	1	0.999999	62.7484
SP_PIR_KEYWORDS	actin-binding	6	3.1746	0.0953132	TAGLN, ACTN1, CNN1, CAP1, MYH10, DSTN	189	247	19235	2.47221	1	0.961649	73.6501
GOTERM_MF_FAT	GO:0003779~actin binding	7	3.7037	0.121368	TLN1, TAGLN, ACTN1, CNN1, CAP1, MYH10, DSTN	135	326	12983	2.06501	1	0.999076	82.6105
GOTERM_MF_FAT	GO:0008092~cytoskeletal protein binding	9	4.7619	0.150167	TLN1, TAGLN, PDLIM3, ACTN1, AATF, CNN1, CAP1, MYH10, DSTN	135	504	12983	1.71733	1	0.999464	88.9183
GOTERM_CC_FAT	GO:0005856~cytoskeleton	19	10.0529	0.170559	MYL6, ACTB, TLN1, KIF5C, VIM, PDLIM3, ACTN1, ARHGAP26, DSTN, DNALI1, PGM5, PBXIP1, MDC1, PPL, FRMD4B, AMOT, KRT4, CAP1, MYH10	132	1381	12782	1.33225	1	0.787459	91.3845
Annotation Cluster 3	Enrichment Score: 1.4718301183539582
Category	Term	Count	%	PValue	Genes	List Total	Pop Hits	Pop Total	Fold Enrichment	Bonferroni	Benjamini	FDR
GOTERM_CC_FAT	GO:0001725~stress fiber	3	1.5873	0.0248308	PGM5, AMOT, MYH10	132	24	12782	12.1042	0.998723	0.810962	28.0818
GOTERM_CC_FAT	GO:0032432~actin filament bundle	3	1.5873	0.028854	PGM5, AMOT, MYH10	132	26	12782	11.1731	0.999573	0.72559	31.876
GOTERM_CC_FAT	GO:0042641~actomyosin	3	1.5873	0.0309567	PGM5, AMOT, MYH10	132	27	12782	10.7593	0.99976	0.695917	33.7845
GOTERM_CC_FAT	GO:0015629~actin cytoskeleton	7	3.7037	0.0584426	MYL6, PGM5, PDLIM3, AMOT, CAP1, MYH10, DSTN	132	269	12782	2.51983	1	0.735485	54.592
Annotation Cluster 4	Enrichment Score: 1.4217883698895342
Category	Term	Count	%	PValue	Genes	List Total	Pop Hits	Pop Total	Fold Enrichment	Bonferroni	Benjamini	FDR
GOTERM_MF_FAT	GO:0051059~NF-kappaB binding	4	2.1164	0.00322826	DOM3Z, CFB, SKIV2L, CSNK2B	135	29	12983	13.2649	0.649238	0.649238	4.27741
GOTERM_BP_FAT	GO:0006986~response to unfolded protein	5	2.6455	0.0068931	DOM3Z, CFB, SKIV2L, HSPB7, CSNK2B	145	71	13528	6.57018	0.999507	0.718961	10.4726
GOTERM_BP_FAT	GO:0051789~response to protein stimulus	5	2.6455	0.0273593	DOM3Z, CFB, SKIV2L, HSPB7, CSNK2B	145	107	13528	4.35965	1	0.966412	35.8321
GOTERM_BP_FAT	GO:0009991~response to extracellular stimulus	7	3.7037	0.0302714	DOM3Z, SFRP2, CFB, SKIV2L, CSNK2B, HSD11B2, IGFBP2	145	220	13528	2.96853	1	0.966101	38.8366
GOTERM_BP_FAT	GO:0010033~response to organic substance	14	7.40741	0.0437789	LDLR, CFB, RBM3, SKIV2L, CSNK2B, HMGCS1, AP3S1, IL6R, DOM3Z, PLCG2, PRKRA, HSPB7, HSD11B2, IGFBP2	145	721	13528	1.81158	1	0.977435	51.1279
GOTERM_BP_FAT	GO:0031667~response to nutrient levels	6	3.1746	0.0594414	DOM3Z, CFB, SKIV2L, CSNK2B, HSD11B2, IGFBP2	145	197	13528	2.84152	1	0.981105	62.4725
GOTERM_BP_FAT	GO:0007584~response to nutrient	5	2.6455	0.0624429	DOM3Z, CFB, SKIV2L, CSNK2B, IGFBP2	145	140	13528	3.33202	1	0.976158	64.3428
GOTERM_MF_FAT	GO:0008134~transcription factor binding	9	4.7619	0.160824	DOM3Z, TRIP4, PBXIP1, CFB, SKIV2L, CSNK2B, DNMT1, RLIM, APBB1	135	513	12983	1.6872	1	0.999176	90.6564
GOTERM_BP_FAT	GO:0006952~defense response	9	4.7619	0.332045	LY75, CCL22, DOM3Z, CFB, SKIV2L, CCR2, MNDA, CSNK2B, IL6R	145	615	13528	1.36532	1	0.998807	99.8426
Annotation Cluster 5	Enrichment Score: 1.2485145146251364
Category	Term	Count	%	PValue	Genes	List Total	Pop Hits	Pop Total	Fold Enrichment	Bonferroni	Benjamini	FDR
GOTERM_BP_FAT	GO:0016458~gene silencing	4	2.1164	0.0217161	RBM3, PRKRA, SIRT6, SCMH1	145	56	13528	6.66404	1	0.951277	29.6116
GOTERM_BP_FAT	GO:0040029~regulation of gene expression, epigenetic	4	2.1164	0.0488514	RBM3, PRKRA, DNMT1, SIRT6	145	77	13528	4.84657	1	0.974682	55.1134
GOTERM_BP_FAT	GO:0010629~negative regulation of gene expression	9	4.7619	0.169355	ZNF350, PBXIP1, RBM3, PRKRA, YWHAQ, DNMT1, SIRT6, SCMH1, RLIM	145	504	13528	1.66601	1	0.995374	94.8574
Annotation Cluster 6	Enrichment Score: 1.0786409926211118
Category	Term	Count	%	PValue	Genes	List Total	Pop Hits	Pop Total	Fold Enrichment	Bonferroni	Benjamini	FDR
GOTERM_CC_FAT	GO:0005925~focal adhesion	5	2.6455	0.0207121	TLN1, PGM5, MDC1, ACTN1, ARHGAP26	132	102	12782	4.74673	0.996098	0.937537	23.9962
GOTERM_CC_FAT	GO:0005924~cell-substrate adherens junction	5	2.6455	0.0234739	TLN1, PGM5, MDC1, ACTN1, ARHGAP26	132	106	12782	4.56761	0.998154	0.87733	26.7588
GOTERM_CC_FAT	GO:0030055~cell-substrate junction	5	2.6455	0.0280185	TLN1, PGM5, MDC1, ACTN1, ARHGAP26	132	112	12782	4.32292	0.999464	0.778245	31.1036
GOTERM_CC_FAT	GO:0070161~anchoring junction	6	3.1746	0.0319525	TLN1, PGM5, MDC1, PPL, ACTN1, ARHGAP26	132	172	12782	3.37791	0.999817	0.658943	34.6711
GOTERM_CC_FAT	GO:0005912~adherens junction	5	2.6455	0.0750712	TLN1, PGM5, MDC1, ACTN1, ARHGAP26	132	155	12782	3.12366	1	0.70373	64.0516
GOTERM_CC_FAT	GO:0005911~cell-cell junction	5	2.6455	0.131129	GJA10, TLN1, PGM5, PPL, AMOT	132	190	12782	2.54825	1	0.748314	84.1618
GOTERM_CC_FAT	GO:0016323~basolateral plasma membrane	5	2.6455	0.15539	TLN1, PGM5, MDC1, ACTN1, ARHGAP26	132	203	12782	2.38506	1	0.797767	89.074
GOTERM_CC_FAT	GO:0030054~cell junction	9	4.7619	0.162384	RABAC1, GJA10, TLN1, PGM5, MDC1, PPL, AMOT, ACTN1, ARHGAP26	132	518	12782	1.68243	1	0.79096	90.2024
SP_PIR_KEYWORDS	cell junction	6	3.1746	0.352484	RABAC1, GJA10, PGM5, PPL, AMOT, ARHGAP26	189	399	19235	1.53041	1	0.987613	99.6932
SP_PIR_KEYWORDS	cytoskeleton	8	4.2328	0.429092	ACTB, TLN1, PGM5, PBXIP1, PPL, FRMD4B, ACTN1, ARHGAP26	189	636	19235	1.28016	1	0.98819	99.9426
Annotation Cluster 7	Enrichment Score: 1.0013220880717946
Category	Term	Count	%	PValue	Genes	List Total	Pop Hits	Pop Total	Fold Enrichment	Bonferroni	Benjamini	FDR
SP_PIR_KEYWORDS	DNA damage	7	3.7037	0.0155989	ERCC5, XPC, CUL4A, MDC1, SETMAR, APBB1, MCTS1	189	205	19235	3.47516	0.990013	0.683878	18.8877
GOTERM_BP_FAT	GO:0006974~response to DNA damage stimulus	9	4.7619	0.0460165	ERCC5, XPC, CUL4A, MDC1, SETMAR, AATF, TERF2IP, APBB1, MCTS1	145	373	13528	2.25112	1	0.975394	52.9252
KEGG_PATHWAY	hsa03420:Nucleotide excision repair	3	1.5873	0.0739067	ERCC5, XPC, CUL4A	53	44	5085	6.5416	0.996592	0.849518	55.2301
SP_PIR_KEYWORDS	dna repair	5	2.6455	0.11715	ERCC5, XPC, CUL4A, MDC1, SETMAR	189	191	19235	2.6642	1	0.974029	80.9678
GOTERM_BP_FAT	GO:0033554~cellular response to stress	10	5.29101	0.149775	MAP4K3, ERCC5, XPC, CUL4A, MDC1, SETMAR, AATF, TERF2IP, APBB1, MCTS1	145	566	13528	1.64835	1	0.993928	92.5355
GOTERM_BP_FAT	GO:0006259~DNA metabolic process	8	4.2328	0.293771	ERCC5, XPC, CUL4A, ORC4L, MDC1, SETMAR, DNMT1, TERF2IP	145	506	13528	1.47504	1	0.999168	99.6162
GOTERM_BP_FAT	GO:0006281~DNA repair	5	2.6455	0.357982	ERCC5, XPC, CUL4A, MDC1, SETMAR	145	284	13528	1.64254	1	0.99863	99.9164
Annotation Cluster 8	Enrichment Score: 0.9754384920737403
Category	Term	Count	%	PValue	Genes	List Total	Pop Hits	Pop Total	Fold Enrichment	Bonferroni	Benjamini	FDR
GOTERM_CC_FAT	GO:0005938~cell cortex	5	2.6455	0.0631307	ACTB, GPSM2, CAP1, MYH10, DSTN	132	146	12782	3.31621	1	0.735341	57.4684
GOTERM_CC_FAT	GO:0030863~cortical cytoskeleton	3	1.5873	0.089786	ACTB, CAP1, DSTN	132	49	12782	5.92857	1	0.730748	70.8679
GOTERM_CC_FAT	GO:0044448~cell cortex part	3	1.5873	0.209043	ACTB, CAP1, DSTN	132	83	12782	3.5	1	0.805127	95.3785
Annotation Cluster 9	Enrichment Score: 0.9491476142102119
Category	Term	Count	%	PValue	Genes	List Total	Pop Hits	Pop Total	Fold Enrichment	Bonferroni	Benjamini	FDR
GOTERM_BP_FAT	GO:0009628~response to abiotic stimulus	9	4.7619	0.043096	GJA10, ERCC5, XPC, RBM3, HSPB7, IL6R, IGFBP2, APBB1, RHO	145	368	13528	2.28171	1	0.987835	50.5666
GOTERM_BP_FAT	GO:0009416~response to light stimulus	5	2.6455	0.0598562	GJA10, ERCC5, XPC, APBB1, RHO	145	138	13528	3.38031	1	0.977071	62.7364
GOTERM_BP_FAT	GO:0009314~response to radiation	6	3.1746	0.0625965	GJA10, ERCC5, XPC, IL6R, APBB1, RHO	145	200	13528	2.7989	1	0.971519	64.436
GOTERM_BP_FAT	GO:0050890~cognition	5	2.6455	0.989269	GJA10, OR10G6, NRL, APBB1, RHO	145	909	13528	0.513182	1	1	100
Annotation Cluster 10	Enrichment Score: 0.8957072531073502
Category	Term	Count	%	PValue	Genes	List Total	Pop Hits	Pop Total	Fold Enrichment	Bonferroni	Benjamini	FDR
GOTERM_CC_FAT	GO:0031410~cytoplasmic vesicle	13	6.87831	0.0319531	SEC31A, ATP1B3, LDLR, CAMK2G, HPS4, SLC24A5, ACTN1, AP3S1, TRIM72, RABAC1, AMOT, IGFBP2, APBA1	132	642	12782	1.9608	0.999817	0.61565	34.6716
GOTERM_CC_FAT	GO:0031982~vesicle	13	6.87831	0.0421289	SEC31A, ATP1B3, LDLR, CAMK2G, HPS4, SLC24A5, ACTN1, AP3S1, TRIM72, RABAC1, AMOT, IGFBP2, APBA1	132	670	12782	1.87886	0.999989	0.680378	43.1231
GOTERM_CC_FAT	GO:0016023~cytoplasmic membrane-bounded vesicle	11	5.82011	0.0560842	RABAC1, SEC31A, LDLR, ATP1B3, CAMK2G, HPS4, SLC24A5, AP3S1, ACTN1, TRIM72, APBA1	132	550	12782	1.93667	1	0.751046	53.0781
GOTERM_CC_FAT	GO:0031988~membrane-bounded vesicle	11	5.82011	0.0666482	RABAC1, SEC31A, LDLR, ATP1B3, CAMK2G, HPS4, SLC24A5, AP3S1, ACTN1, TRIM72, APBA1	132	568	12782	1.87529	1	0.704334	59.5149
GOTERM_CC_FAT	GO:0044433~cytoplasmic vesicle part	5	2.6455	0.125772	SEC31A, LDLR, CAMK2G, ACTN1, TRIM72	132	187	12782	2.58913	1	0.74589	82.8327
GOTERM_CC_FAT	GO:0030659~cytoplasmic vesicle membrane	4	2.1164	0.170957	SEC31A, LDLR, CAMK2G, TRIM72	132	139	12782	2.78657	1	0.778104	91.4385
GOTERM_CC_FAT	GO:0012506~vesicle membrane	4	2.1164	0.201878	SEC31A, LDLR, CAMK2G, TRIM72	132	151	12782	2.56512	1	0.801114	94.7985
GOTERM_CC_FAT	GO:0030135~coated vesicle	4	2.1164	0.223178	RABAC1, SEC31A, LDLR, APBA1	132	159	12782	2.43606	1	0.820217	96.3515
SP_PIR_KEYWORDS	cytoplasmic vesicle	4	2.1164	0.408585	RABAC1, SEC31A, AP3S1, TRIM72	189	238	19235	1.71046	1	0.993017	99.9082
GOTERM_CC_FAT	GO:0012505~endomembrane system	9	4.7619	0.554256	MFNG, SEC31A, LDLR, CAMK2G, CYP26B1, PI4KB, KRTCAP2, TRIM72, HPD	132	782	12782	1.11445	1	0.962902	99.9975
Annotation Cluster 11	Enrichment Score: 0.8196090235388934
Category	Term	Count	%	PValue	Genes	List Total	Pop Hits	Pop Total	Fold Enrichment	Bonferroni	Benjamini	FDR
GOTERM_CC_FAT	GO:0031981~nuclear lumen	22	11.6402	0.0641609	ACTB, TRIP4, NOL7, PDLIM3, ACTN1, SIRT6, TERF2IP, PPP1CC, RLIM, CYB561, C19ORF33, KCTD10, ERCC5, ZNF350, XPC, ORC4L, MDC1, GPSM2, AATF, PES1, RERE, INO80B	132	1450	12782	1.4692	1	0.714977	58.0774
GOTERM_CC_FAT	GO:0043232~intracellular non-membrane-bounded organelle	35	18.5185	0.0691635	MYL6, TLN1, VIM, PDLIM3, TERF2IP, DSTN, DNALI1, ZNF350, PBXIP1, ORC4L, MDC1, RPL6, PPL, GPSM2, AATF, CAP1, RPL12, RPS20, KRT4, INO80B, ACTB, TRIP4, NOL7, KIF5C, ACTN1, SIRT6, CYB561, ARHGAP26, C19ORF33, KCTD10, PGM5, FRMD4B, AMOT, PES1, MYH10	132	2596	12782	1.30553	1	0.694884	60.9222
GOTERM_CC_FAT	GO:0043228~non-membrane-bounded organelle	35	18.5185	0.0691635	MYL6, TLN1, VIM, PDLIM3, TERF2IP, DSTN, DNALI1, ZNF350, PBXIP1, ORC4L, MDC1, RPL6, PPL, GPSM2, AATF, CAP1, RPL12, RPS20, KRT4, INO80B, ACTB, TRIP4, NOL7, KIF5C, ACTN1, SIRT6, CYB561, ARHGAP26, C19ORF33, KCTD10, PGM5, FRMD4B, AMOT, PES1, MYH10	132	2596	12782	1.30553	1	0.694884	60.9222
GOTERM_CC_FAT	GO:0005730~nucleolus	12	6.34921	0.102603	C19ORF33, KCTD10, ZNF350, TRIP4, NOL7, PDLIM3, GPSM2, ACTN1, AATF, PES1, CYB561, INO80B	132	698	12782	1.66476	1	0.728559	75.8106
GOTERM_CC_FAT	GO:0070013~intracellular organelle lumen	22	11.6402	0.275875	ACTB, TRIP4, NOL7, PDLIM3, ACTN1, SIRT6, TERF2IP, PPP1CC, RLIM, CYB561, C19ORF33, KCTD10, ERCC5, ZNF350, XPC, ORC4L, MDC1, GPSM2, AATF, PES1, RERE, INO80B	132	1779	12782	1.19749	1	0.869536	98.5474
GOTERM_CC_FAT	GO:0005654~nucleoplasm	12	6.34921	0.293831	ACTB, ZNF350, ERCC5, XPC, ORC4L, MDC1, SIRT6, TERF2IP, PPP1CC, PES1, RLIM, RERE	132	882	12782	1.31746	1	0.871104	98.9548
GOTERM_CC_FAT	GO:0043233~organelle lumen	22	11.6402	0.313119	ACTB, TRIP4, NOL7, PDLIM3, ACTN1, SIRT6, TERF2IP, PPP1CC, RLIM, CYB561, C19ORF33, KCTD10, ERCC5, ZNF350, XPC, ORC4L, MDC1, GPSM2, AATF, PES1, RERE, INO80B	132	1820	12782	1.17051	1	0.885107	99.273
GOTERM_CC_FAT	GO:0031974~membrane-enclosed lumen	22	11.6402	0.347074	ACTB, TRIP4, NOL7, PDLIM3, ACTN1, SIRT6, TERF2IP, PPP1CC, RLIM, CYB561, C19ORF33, KCTD10, ERCC5, ZNF350, XPC, ORC4L, MDC1, GPSM2, AATF, PES1, RERE, INO80B	132	1856	12782	1.14781	1	0.890851	99.626
Annotation Cluster 12	Enrichment Score: 0.7883227825268143
Category	Term	Count	%	PValue	Genes	List Total	Pop Hits	Pop Total	Fold Enrichment	Bonferroni	Benjamini	FDR
GOTERM_BP_FAT	GO:0016477~cell migration	7	3.7037	0.0746665	CCL22, TNFRSF12A, AMOT, IL6R, CAP1, APBB1, MYH10	145	276	13528	2.36622	1	0.97156	71.0936
GOTERM_BP_FAT	GO:0051674~localization of cell	7	3.7037	0.109823	CCL22, TNFRSF12A, AMOT, IL6R, CAP1, APBB1, MYH10	145	307	13528	2.12728	1	0.986011	84.442
GOTERM_BP_FAT	GO:0048870~cell motility	7	3.7037	0.109823	CCL22, TNFRSF12A, AMOT, IL6R, CAP1, APBB1, MYH10	145	307	13528	2.12728	1	0.986011	84.442
GOTERM_CC_FAT	GO:0031252~cell leading edge	4	2.1164	0.168445	TLN1, TNFRSF12A, AMOT, APBB1	132	138	12782	2.80676	1	0.793369	91.0922
GOTERM_BP_FAT	GO:0032535~regulation of cellular component size	5	2.6455	0.326516	TNFRSF12A, AMOT, CSRP2, APBB1, DSTN	145	271	13528	1.72134	1	0.999106	99.8204
GOTERM_BP_FAT	GO:0008361~regulation of cell size	4	2.1164	0.376	TNFRSF12A, AMOT, CSRP2, APBB1	145	206	13528	1.81158	1	0.998222	99.947
Annotation Cluster 13	Enrichment Score: 0.6940541746772906
Category	Term	Count	%	PValue	Genes	List Total	Pop Hits	Pop Total	Fold Enrichment	Bonferroni	Benjamini	FDR
GOTERM_BP_FAT	GO:0042330~taxis	5	2.6455	0.0914596	CCL22, CCR2, AMOT, IL6R, LECT2	145	160	13528	2.91552	1	0.98278	78.4334
GOTERM_BP_FAT	GO:0006935~chemotaxis	5	2.6455	0.0914596	CCL22, CCR2, AMOT, IL6R, LECT2	145	160	13528	2.91552	1	0.98278	78.4334
GOTERM_BP_FAT	GO:0007626~locomotory behavior	6	3.1746	0.168133	CCL22, CCR2, AMOT, IL6R, LECT2, APBA1	145	274	13528	2.04299	1	0.995821	94.7352
KEGG_PATHWAY	hsa04060:Cytokine-cytokine receptor interaction	5	2.6455	0.278957	CCL22, TNFRSF12A, CCR2, EPOR, IL6R	53	262	5085	1.83098	1	0.844593	96.7392
GOTERM_BP_FAT	GO:0007610~behavior	7	3.7037	0.382606	CCL22, CCR2, AMOT, IL6R, LECT2, APBB1, APBA1	145	469	13528	1.39249	1	0.998334	99.9553
GOTERM_BP_FAT	GO:0006954~inflammatory response	5	2.6455	0.456323	LY75, CCL22, CFB, CCR2, IL6R	145	325	13528	1.43533	1	0.998609	99.9941
Annotation Cluster 14	Enrichment Score: 0.6794636590470986
Category	Term	Count	%	PValue	Genes	List Total	Pop Hits	Pop Total	Fold Enrichment	Bonferroni	Benjamini	FDR
GOTERM_CC_FAT	GO:0030018~Z disc	3	1.5873	0.0805775	PGM5, PDLIM3, ACTN1	132	46	12782	6.31522	1	0.70969	66.7583
GOTERM_CC_FAT	GO:0031674~I band	3	1.5873	0.109056	PGM5, PDLIM3, ACTN1	132	55	12782	5.28182	1	0.705955	77.9942
GOTERM_CC_FAT	GO:0030017~sarcomere	3	1.5873	0.265848	PGM5, PDLIM3, ACTN1	132	98	12782	2.96429	1	0.864319	98.2604
GOTERM_CC_FAT	GO:0030016~myofibril	3	1.5873	0.315176	PGM5, PDLIM3, ACTN1	132	111	12782	2.61712	1	0.881711	99.3011
GOTERM_CC_FAT	GO:0044449~contractile fiber part	3	1.5873	0.322716	PGM5, PDLIM3, ACTN1	132	113	12782	2.5708	1	0.878443	99.3955
GOTERM_CC_FAT	GO:0043292~contractile fiber	3	1.5873	0.352652	PGM5, PDLIM3, ACTN1	132	121	12782	2.40083	1	0.890974	99.6658
Annotation Cluster 15	Enrichment Score: 0.6057817001560964
Category	Term	Count	%	PValue	Genes	List Total	Pop Hits	Pop Total	Fold Enrichment	Bonferroni	Benjamini	FDR
GOTERM_BP_FAT	GO:0032940~secretion by cell	6	3.1746	0.0703208	PLDN, CAMK2G, RABEPK, TRIM72, APBA1, MYH10	145	207	13528	2.70425	1	0.973986	68.8443
GOTERM_BP_FAT	GO:0006887~exocytosis	4	2.1164	0.124125	PLDN, RABEPK, TRIM72, MYH10	145	115	13528	3.2451	1	0.989537	87.9925
GOTERM_BP_FAT	GO:0046903~secretion	6	3.1746	0.215786	PLDN, CAMK2G, RABEPK, TRIM72, APBA1, MYH10	145	300	13528	1.86593	1	0.998291	97.9505
GOTERM_BP_FAT	GO:0003001~generation of a signal involved in cell-cell signaling	3	1.5873	0.228956	PLDN, CAMK2G, APBA1	145	85	13528	3.29282	1	0.998273	98.4368
GOTERM_BP_FAT	GO:0042060~wound healing	3	1.5873	0.6063	PLDN, TRIM72, MYH10	145	191	13528	1.46539	1	0.999555	100
GOTERM_BP_FAT	GO:0007267~cell-cell signaling	5	2.6455	0.886959	CCL22, PLDN, CAMK2G, KCNK3, APBA1	145	600	13528	0.777471	1	0.999998	100
Annotation Cluster 16	Enrichment Score: 0.6004636343663415
Category	Term	Count	%	PValue	Genes	List Total	Pop Hits	Pop Total	Fold Enrichment	Bonferroni	Benjamini	FDR
KEGG_PATHWAY	hsa00562:Inositol phosphate metabolism	3	1.5873	0.104908	PLCG2, PIKFYVE, PI4KB	53	54	5085	5.33019	0.999726	0.871309	68.6519
KEGG_PATHWAY	hsa04070:Phosphatidylinositol signaling system	3	1.5873	0.174626	PLCG2, PIKFYVE, PI4KB	53	74	5085	3.8896	0.999999	0.830558	86.5844
GOTERM_BP_FAT	GO:0019637~organophosphate metabolic process	4	2.1164	0.35859	TALDO1, PLCG2, PIKFYVE, PI4KB	145	200	13528	1.86593	1	0.998393	99.9177
GOTERM_BP_FAT	GO:0006644~phospholipid metabolic process	3	1.5873	0.603432	PLCG2, PIKFYVE, PI4KB	145	190	13528	1.4731	1	0.999554	100
Annotation Cluster 17	Enrichment Score: 0.5972277560967086
Category	Term	Count	%	PValue	Genes	List Total	Pop Hits	Pop Total	Fold Enrichment	Bonferroni	Benjamini	FDR
GOTERM_MF_FAT	GO:0019901~protein kinase binding	4	2.1164	0.194134	ACTB, VIM, PRKCDBP, PPP1CC	135	147	12983	2.61688	1	0.999082	94.5962
GOTERM_MF_FAT	GO:0019900~kinase binding	4	2.1164	0.2816	ACTB, VIM, PRKCDBP, PPP1CC	135	179	12983	2.14906	1	0.99921	98.8568
GOTERM_MF_FAT	GO:0019899~enzyme binding	8	4.2328	0.295517	ACTB, CUL4A, VIM, RAP1A, EPOR, PRKCDBP, IL6R, PPP1CC	135	523	12983	1.47106	1	0.999169	99.1225
Annotation Cluster 18	Enrichment Score: 0.5804683782914307
Category	Term	Count	%	PValue	Genes	List Total	Pop Hits	Pop Total	Fold Enrichment	Bonferroni	Benjamini	FDR
SP_PIR_KEYWORDS	protein biosynthesis	6	3.1746	0.0376072	EEF1B2, DHX29, RPL6, EIF3I, RPL12, RPS20	189	188	19235	3.24806	0.999987	0.84617	39.9742
GOTERM_BP_FAT	GO:0006414~translational elongation	4	2.1164	0.0929495	EEF1B2, RPL6, RPL12, RPS20	145	101	13528	3.69491	1	0.978422	78.9921
GOTERM_BP_FAT	GO:0006412~translation	7	3.7037	0.141956	EEF1B2, DHX29, RPL6, RBM3, EIF3I, RPL12, RPS20	145	331	13528	1.97304	1	0.992971	91.3584
SP_PIR_KEYWORDS	ribosome	3	1.5873	0.159813	RPL6, RPL12, RPS20	189	73	19235	4.18243	1	0.97386	90.1582
KEGG_PATHWAY	hsa03010:Ribosome	3	1.5873	0.223137	RPL6, RPL12, RPS20	53	87	5085	3.30839	1	0.789239	92.8835
GOTERM_MF_FAT	GO:0008135~translation factor activity, nucleic acid binding	3	1.5873	0.268482	EEF1B2, DHX29, EIF3I	135	98	12983	2.94399	1	0.999587	98.54
GOTERM_MF_FAT	GO:0003735~structural constituent of ribosome	3	1.5873	0.519844	RPL6, RPL12, RPS20	135	168	12983	1.71733	1	0.999406	99.9951
SP_PIR_KEYWORDS	ribosomal protein	3	1.5873	0.551288	RPL6, RPL12, RPS20	189	188	19235	1.62403	1	0.993234	99.9977
GOTERM_CC_FAT	GO:0030529~ribonucleoprotein complex	6	3.1746	0.612301	ACTB, RPL6, RPL12, RPS20, PES1, SF3B4	132	515	12782	1.12816	1	0.973723	99.9996
GOTERM_CC_FAT	GO:0005840~ribosome	3	1.5873	0.65026	RPL6, RPL12, RPS20	132	215	12782	1.35116	1	0.979072	99.9999
SP_PIR_KEYWORDS	ribonucleoprotein	3	1.5873	0.759932	RPL6, RPL12, RPS20	189	279	19235	1.09433	1	0.998226	100
Annotation Cluster 19	Enrichment Score: 0.5731700305695074
Category	Term	Count	%	PValue	Genes	List Total	Pop Hits	Pop Total	Fold Enrichment	Bonferroni	Benjamini	FDR
GOTERM_MF_FAT	GO:0004722~protein serine/threonine phosphatase activity	3	1.5873	0.078528	PPM1G, CAMK2G, PPP1CC	135	45	12983	6.41136	1	0.995006	66.9016
GOTERM_MF_FAT	GO:0016791~phosphatase activity	4	2.1164	0.476131	PPM1G, CAMK2G, PPP1CC, PSPH	135	249	12983	1.54491	1	0.999436	99.984
GOTERM_MF_FAT	GO:0004721~phosphoprotein phosphatase activity	3	1.5873	0.510198	PPM1G, CAMK2G, PPP1CC	135	165	12983	1.74855	1	0.999424	99.9936
Annotation Cluster 20	Enrichment Score: 0.5582004979045282
Category	Term	Count	%	PValue	Genes	List Total	Pop Hits	Pop Total	Fold Enrichment	Bonferroni	Benjamini	FDR
GOTERM_BP_FAT	GO:0010605~negative regulation of macromolecule metabolic process	14	7.40741	0.0492424	RBM3, SIRT6, TERF2IP, IL6R, RLIM, PAIP2B, ZNF350, PBXIP1, PRKRA, YWHAQ, DNMT1, AATF, SCMH1, APBB1	145	734	13528	1.7795	1	0.969031	55.4075
GOTERM_BP_FAT	GO:0010558~negative regulation of macromolecule biosynthetic process	11	5.82011	0.0670998	ZNF350, PBXIP1, YWHAQ, DNMT1, SIRT6, AATF, IL6R, SCMH1, RLIM, APBB1, PAIP2B	145	547	13528	1.87616	1	0.973788	67.0723
GOTERM_BP_FAT	GO:0009890~negative regulation of biosynthetic process	11	5.82011	0.0852774	ZNF350, PBXIP1, YWHAQ, DNMT1, SIRT6, AATF, IL6R, SCMH1, RLIM, APBB1, PAIP2B	145	573	13528	1.79103	1	0.980267	75.9627
GOTERM_BP_FAT	GO:0010629~negative regulation of gene expression	9	4.7619	0.169355	ZNF350, PBXIP1, RBM3, PRKRA, YWHAQ, DNMT1, SIRT6, SCMH1, RLIM	145	504	13528	1.66601	1	0.995374	94.8574
GOTERM_BP_FAT	GO:0031327~negative regulation of cellular biosynthetic process	9	4.7619	0.248287	ZNF350, PBXIP1, YWHAQ, DNMT1, SIRT6, AATF, SCMH1, RLIM, PAIP2B	145	561	13528	1.49674	1	0.99836	98.9585
GOTERM_BP_FAT	GO:0045934~negative regulation of nucleobase, nucleoside, nucleotide and nucleic acid metabolic process	8	4.2328	0.303932	ZNF350, PBXIP1, YWHAQ, DNMT1, SIRT6, TERF2IP, SCMH1, RLIM	145	512	13528	1.45776	1	0.999087	99.6956
GOTERM_BP_FAT	GO:0051172~negative regulation of nitrogen compound metabolic process	8	4.2328	0.315881	ZNF350, PBXIP1, YWHAQ, DNMT1, SIRT6, TERF2IP, SCMH1, RLIM	145	519	13528	1.4381	1	0.999057	99.7692
GOTERM_BP_FAT	GO:0016481~negative regulation of transcription	7	3.7037	0.363512	ZNF350, PBXIP1, YWHAQ, DNMT1, SIRT6, SCMH1, RLIM	145	459	13528	1.42282	1	0.998435	99.9272
GOTERM_MF_FAT	GO:0016564~transcription repressor activity	4	2.1164	0.637275	ZNF350, PBXIP1, SCMH1, RLIM	135	316	12983	1.21735	1	0.999781	99.9999
GOTERM_BP_FAT	GO:0045892~negative regulation of transcription, DNA-dependent	3	1.5873	0.896136	YWHAQ, DNMT1, SIRT6	145	356	13528	0.786207	1	0.999998	100
GOTERM_BP_FAT	GO:0051253~negative regulation of RNA metabolic process	3	1.5873	0.901424	YWHAQ, DNMT1, SIRT6	145	362	13528	0.773176	1	0.999998	100
GOTERM_BP_FAT	GO:0045449~regulation of transcription	22	11.6402	0.940804	TBX15, TRIP4, ZBTB41, SIRT6, SP110, TERF2IP, RLIM, ZNF618, TSC22D1, ZNF350, PBXIP1, RPL6, NRL, HOXD4, YWHAQ, MNDA, DNMT1, AATF, SCMH1, APBB1, MCTS1, RERE	145	2601	13528	0.789129	1	1	100
Annotation Cluster 21	Enrichment Score: 0.5211144550961673
Category	Term	Count	%	PValue	Genes	List Total	Pop Hits	Pop Total	Fold Enrichment	Bonferroni	Benjamini	FDR
GOTERM_BP_FAT	GO:0010638~positive regulation of organelle organization	3	1.5873	0.221109	DNMT1, AMOT, DSTN	145	83	13528	3.37216	1	0.998335	98.162
GOTERM_BP_FAT	GO:0051130~positive regulation of cellular component organization	4	2.1164	0.303217	TNFRSF12A, DNMT1, AMOT, DSTN	145	181	13528	2.0618	1	0.999177	99.6905
GOTERM_BP_FAT	GO:0033043~regulation of organelle organization	4	2.1164	0.407658	DNMT1, AMOT, TERF2IP, DSTN	145	217	13528	1.71975	1	0.998463	99.977
Annotation Cluster 22	Enrichment Score: 0.5005867678447352
Category	Term	Count	%	PValue	Genes	List Total	Pop Hits	Pop Total	Fold Enrichment	Bonferroni	Benjamini	FDR
GOTERM_BP_FAT	GO:0006006~glucose metabolic process	4	2.1164	0.222645	TALDO1, PGM5, GYG1, PPP1CC	145	153	13528	2.43913	1	0.998168	98.2191
GOTERM_BP_FAT	GO:0019318~hexose metabolic process	4	2.1164	0.335288	TALDO1, PGM5, GYG1, PPP1CC	145	192	13528	1.94368	1	0.998377	99.8544
GOTERM_BP_FAT	GO:0005996~monosaccharide metabolic process	4	2.1164	0.4219	TALDO1, PGM5, GYG1, PPP1CC	145	222	13528	1.68102	1	0.998582	99.9844
Annotation Cluster 23	Enrichment Score: 0.4709297689285796
Category	Term	Count	%	PValue	Genes	List Total	Pop Hits	Pop Total	Fold Enrichment	Bonferroni	Benjamini	FDR
GOTERM_BP_FAT	GO:0046907~intracellular transport	12	6.34921	0.0916182	MYL6, STX8, PLDN, SEC31A, PIKFYVE, HPS4, YWHAQ, AP3S1, RHOB, RERE, APBA1, MYH10	145	657	13528	1.70405	1	0.980126	78.4935
GOTERM_BP_FAT	GO:0008104~protein localization	13	6.87831	0.229458	TLN1, PLDN, SEC31A, GOLT1B, HPS4, AP3S1, TERF2IP, RABEP2, PIKFYVE, YWHAQ, RHOB, APBA1, RERE	145	882	13528	1.37512	1	0.998048	98.453
GOTERM_BP_FAT	GO:0034613~cellular protein localization	7	3.7037	0.273617	PIKFYVE, HPS4, YWHAQ, AP3S1, TERF2IP, RERE, APBA1	145	411	13528	1.58899	1	0.999123	99.398
GOTERM_BP_FAT	GO:0070727~cellular macromolecule localization	7	3.7037	0.279089	PIKFYVE, HPS4, YWHAQ, AP3S1, TERF2IP, RERE, APBA1	145	414	13528	1.57748	1	0.999021	99.4666
GOTERM_BP_FAT	GO:0015031~protein transport	10	5.29101	0.423426	PLDN, RABEP2, SEC31A, GOLT1B, HPS4, YWHAQ, AP3S1, RHOB, RERE, APBA1	145	762	13528	1.22436	1	0.998525	99.985
GOTERM_BP_FAT	GO:0045184~establishment of protein localization	10	5.29101	0.434181	PLDN, RABEP2, SEC31A, GOLT1B, HPS4, YWHAQ, AP3S1, RHOB, RERE, APBA1	145	769	13528	1.21322	1	0.998543	99.9889
SP_PIR_KEYWORDS	protein transport	6	3.1746	0.515215	RABEP2, SEC31A, GOLT1B, AP3S1, RHOB, APBA1	189	485	19235	1.25904	1	0.991034	99.9935
GOTERM_BP_FAT	GO:0006886~intracellular protein transport	5	2.6455	0.566543	HPS4, YWHAQ, AP3S1, RERE, APBA1	145	374	13528	1.24728	1	0.999366	99.9998
GOTERM_BP_FAT	GO:0006605~protein targeting	3	1.5873	0.67049	HPS4, YWHAQ, RERE	145	215	13528	1.30181	1	0.999782	100
Annotation Cluster 24	Enrichment Score: 0.457071208971375
Category	Term	Count	%	PValue	Genes	List Total	Pop Hits	Pop Total	Fold Enrichment	Bonferroni	Benjamini	FDR
GOTERM_BP_FAT	GO:0051384~response to glucocorticoid stimulus	3	1.5873	0.201606	HSD11B2, IL6R, IGFBP2	145	78	13528	3.58833	1	0.997633	97.2703
GOTERM_BP_FAT	GO:0031960~response to corticosteroid stimulus	3	1.5873	0.228956	HSD11B2, IL6R, IGFBP2	145	85	13528	3.29282	1	0.998273	98.4368
GOTERM_BP_FAT	GO:0048545~response to steroid hormone stimulus	4	2.1164	0.335288	LDLR, HSD11B2, IL6R, IGFBP2	145	192	13528	1.94368	1	0.998377	99.8544
GOTERM_BP_FAT	GO:0009719~response to endogenous stimulus	6	3.1746	0.432899	LDLR, HMGCS1, HSD11B2, AP3S1, IL6R, IGFBP2	145	405	13528	1.38217	1	0.998603	99.9885
GOTERM_BP_FAT	GO:0043434~response to peptide hormone stimulus	3	1.5873	0.489732	HSD11B2, AP3S1, IL6R	145	154	13528	1.81747	1	0.998811	99.9979
GOTERM_BP_FAT	GO:0009725~response to hormone stimulus	5	2.6455	0.551514	LDLR, HSD11B2, AP3S1, IL6R, IGFBP2	145	367	13528	1.27107	1	0.999237	99.9997
Annotation Cluster 25	Enrichment Score: 0.43546641788540513
Category	Term	Count	%	PValue	Genes	List Total	Pop Hits	Pop Total	Fold Enrichment	Bonferroni	Benjamini	FDR
SP_PIR_KEYWORDS	Symport	3	1.5873	0.295667	SLC16A13, SLC45A1, SLC24A5	189	111	19235	2.75061	1	0.99061	99.0599
GOTERM_BP_FAT	GO:0055085~transmembrane transport	8	4.2328	0.403	SLC16A13, COX3, SLC45A1, SLC24A5, SLC22A20, MCOLN2, SPNS1, MCART1	145	569	13528	1.31173	1	0.998538	99.9739
GOTERM_MF_FAT	GO:0015293~symporter activity	3	1.5873	0.41447	SLC16A13, SLC45A1, SLC24A5	135	137	12983	2.10592	1	0.999623	99.928
Annotation Cluster 26	Enrichment Score: 0.4346362942863367
Category	Term	Count	%	PValue	Genes	List Total	Pop Hits	Pop Total	Fold Enrichment	Bonferroni	Benjamini	FDR
GOTERM_BP_FAT	GO:0043009~chordate embryonic development	6	3.1746	0.27732	TBX15, SFRP2, HOXD4, AMOT, APBA1, MYH10	145	331	13528	1.69118	1	0.999099	99.4453
GOTERM_BP_FAT	GO:0009792~embryonic development ending in birth or egg hatching	6	3.1746	0.283474	TBX15, SFRP2, HOXD4, AMOT, APBA1, MYH10	145	334	13528	1.67599	1	0.999017	99.5162
GOTERM_BP_FAT	GO:0048598~embryonic morphogenesis	5	2.6455	0.413527	TBX15, HOXD4, PRKRA, CYP26B1, AMOT	145	307	13528	1.51949	1	0.998538	99.9803
GOTERM_BP_FAT	GO:0001701~in utero embryonic development	3	1.5873	0.561638	AMOT, APBA1, MYH10	145	176	13528	1.59028	1	0.99934	99.9998
Annotation Cluster 27	Enrichment Score: 0.4155340935816848
Category	Term	Count	%	PValue	Genes	List Total	Pop Hits	Pop Total	Fold Enrichment	Bonferroni	Benjamini	FDR
SP_PIR_KEYWORDS	motor protein	4	2.1164	0.139252	MYL6, DNALI1, KIF5C, MYH10	189	132	19235	3.08401	1	0.965943	86.4206
GOTERM_MF_FAT	GO:0003774~motor activity	4	2.1164	0.181129	MYL6, DNALI1, KIF5C, MYH10	135	142	12983	2.70902	1	0.999249	93.2904
GOTERM_CC_FAT	GO:0044430~cytoskeletal part	11	5.82011	0.515525	MYL6, DNALI1, PGM5, PBXIP1, KIF5C, VIM, AMOT, KRT4, CAP1, MYH10, DSTN	132	952	12782	1.11887	1	0.950246	99.9925
GOTERM_CC_FAT	GO:0044463~cell projection part	3	1.5873	0.695542	DNALI1, KIF5C, MYH10	132	234	12782	1.24145	1	0.985033	100
GOTERM_CC_FAT	GO:0015630~microtubule cytoskeleton	4	2.1164	0.924628	DNALI1, PBXIP1, KIF5C, MYH10	132	549	12782	0.705525	1	0.999317	100
Annotation Cluster 28	Enrichment Score: 0.3967904410868033
Category	Term	Count	%	PValue	Genes	List Total	Pop Hits	Pop Total	Fold Enrichment	Bonferroni	Benjamini	FDR
GOTERM_BP_FAT	GO:0007155~cell adhesion	10	5.29101	0.328835	LAMA4, PGM5, TNFRSF12A, CNTN6, RHOB, ACTN1, AATF, IZUMO1, CD151, APBA1	145	700	13528	1.33281	1	0.998951	99.83
GOTERM_BP_FAT	GO:0022610~biological adhesion	10	5.29101	0.330335	LAMA4, PGM5, TNFRSF12A, CNTN6, RHOB, ACTN1, AATF, IZUMO1, CD151, APBA1	145	701	13528	1.33091	1	0.998877	99.836
SP_PIR_KEYWORDS	cell adhesion	5	2.6455	0.593876	LAMA4, PGM5, TNFRSF12A, CNTN6, RHOB	189	422	19235	1.20584	1	0.993763	99.9994
Annotation Cluster 29	Enrichment Score: 0.37140158563503795
Category	Term	Count	%	PValue	Genes	List Total	Pop Hits	Pop Total	Fold Enrichment	Bonferroni	Benjamini	FDR
GOTERM_CC_FAT	GO:0044421~extracellular region part	12	6.34921	0.39578	CHADL, LAMA4, CCL22, MFNG, ADAMTSL1, LDLR, SPARCL1, FGL2, IL6R, LECT2, IGFBP2, LOXL1	132	960	12782	1.21042	1	0.911741	99.8646
GOTERM_CC_FAT	GO:0005578~proteinaceous extracellular matrix	5	2.6455	0.416225	CHADL, LAMA4, ADAMTSL1, SPARCL1, LOXL1	132	320	12782	1.51302	1	0.921686	99.9138
SP_PIR_KEYWORDS	extracellular matrix	4	2.1164	0.419321	CHADL, LAMA4, ADAMTSL1, SPARCL1	189	241	19235	1.68917	1	0.991983	99.9281
GOTERM_CC_FAT	GO:0031012~extracellular matrix	5	2.6455	0.473221	CHADL, LAMA4, ADAMTSL1, SPARCL1, LOXL1	132	345	12782	1.40338	1	0.941044	99.9776
Annotation Cluster 30	Enrichment Score: 0.3549648181096514
Category	Term	Count	%	PValue	Genes	List Total	Pop Hits	Pop Total	Fold Enrichment	Bonferroni	Benjamini	FDR
GOTERM_BP_FAT	GO:0006952~defense response	9	4.7619	0.332045	LY75, CCL22, DOM3Z, CFB, SKIV2L, CCR2, MNDA, CSNK2B, IL6R	145	615	13528	1.36532	1	0.998807	99.8426
GOTERM_BP_FAT	GO:0009611~response to wounding	8	4.2328	0.334828	LY75, CCL22, PLDN, CFB, CCR2, IL6R, TRIM72, MYH10	145	530	13528	1.40825	1	0.998641	99.8527
GOTERM_BP_FAT	GO:0006954~inflammatory response	5	2.6455	0.456323	LY75, CCL22, CFB, CCR2, IL6R	145	325	13528	1.43533	1	0.998609	99.9941
GOTERM_BP_FAT	GO:0006955~immune response	7	3.7037	0.749634	LY75, CCL22, CFB, CCR2, PLCG2, PRKRA, IL6R	145	690	13528	0.946487	1	0.999932	100
Annotation Cluster 31	Enrichment Score: 0.35472697064791786
Category	Term	Count	%	PValue	Genes	List Total	Pop Hits	Pop Total	Fold Enrichment	Bonferroni	Benjamini	FDR
KEGG_PATHWAY	hsa04060:Cytokine-cytokine receptor interaction	5	2.6455	0.278957	CCL22, TNFRSF12A, CCR2, EPOR, IL6R	53	262	5085	1.83098	1	0.844593	96.7392
GOTERM_MF_FAT	GO:0019955~cytokine binding	3	1.5873	0.310528	CCR2, EPOR, IL6R	135	109	12983	2.64689	1	0.99876	99.3442
SP_PIR_KEYWORDS	receptor	8	4.2328	0.99582	LY75, OR10G6, LDLR, TNFRSF12A, CCR2, EPOR, IL6R, RHO	189	1583	19235	0.514327	1	1	100
Annotation Cluster 32	Enrichment Score: 0.3439647632064909
Category	Term	Count	%	PValue	Genes	List Total	Pop Hits	Pop Total	Fold Enrichment	Bonferroni	Benjamini	FDR
GOTERM_CC_FAT	GO:0042995~cell projection	11	5.82011	0.177722	ACTB, TLN1, DNALI1, TNFRSF12A, KIF5C, VIM, AMOT, ACTN1, APBB1, MYH10, RHO	132	697	12782	1.52822	1	0.782406	92.3105
GOTERM_BP_FAT	GO:0007411~axon guidance	3	1.5873	0.315666	KIF5C, APBB1, MYH10	145	107	13528	2.61579	1	0.999157	99.7681
GOTERM_BP_FAT	GO:0007409~axonogenesis	4	2.1164	0.338204	ACTB, KIF5C, APBB1, MYH10	145	193	13528	1.93361	1	0.998341	99.8642
GOTERM_BP_FAT	GO:0048667~cell morphogenesis involved in neuron differentiation	4	2.1164	0.384672	ACTB, KIF5C, APBB1, MYH10	145	209	13528	1.78558	1	0.998279	99.9576
GOTERM_BP_FAT	GO:0048812~neuron projection morphogenesis	4	2.1164	0.396193	ACTB, KIF5C, APBB1, MYH10	145	213	13528	1.75205	1	0.998433	99.9687
GOTERM_CC_FAT	GO:0043005~neuron projection	5	2.6455	0.466477	ACTB, KIF5C, VIM, APBB1, MYH10	132	342	12782	1.41569	1	0.940502	99.9735
GOTERM_BP_FAT	GO:0000904~cell morphogenesis involved in differentiation	4	2.1164	0.483039	ACTB, KIF5C, APBB1, MYH10	145	244	13528	1.52945	1	0.999011	99.9974
GOTERM_BP_FAT	GO:0048858~cell projection morphogenesis	4	2.1164	0.485748	ACTB, KIF5C, APBB1, MYH10	145	245	13528	1.52321	1	0.998933	99.9976
GOTERM_BP_FAT	GO:0048666~neuron development	5	2.6455	0.488901	ACTB, NRL, KIF5C, APBB1, MYH10	145	339	13528	1.37606	1	0.998863	99.9978
GOTERM_BP_FAT	GO:0032990~cell part morphogenesis	4	2.1164	0.515098	ACTB, KIF5C, APBB1, MYH10	145	256	13528	1.45776	1	0.999022	99.9991
GOTERM_BP_FAT	GO:0031175~neuron projection development	4	2.1164	0.515098	ACTB, KIF5C, APBB1, MYH10	145	256	13528	1.45776	1	0.999022	99.9991
GOTERM_BP_FAT	GO:0000902~cell morphogenesis	5	2.6455	0.527368	ACTB, KIF5C, CAP1, APBB1, MYH10	145	356	13528	1.31034	1	0.999186	99.9994
GOTERM_BP_FAT	GO:0032989~cellular component morphogenesis	5	2.6455	0.613928	ACTB, KIF5C, CAP1, APBB1, MYH10	145	397	13528	1.17502	1	0.999549	100
GOTERM_BP_FAT	GO:0030182~neuron differentiation	5	2.6455	0.690121	ACTB, NRL, KIF5C, APBB1, MYH10	145	438	13528	1.06503	1	0.999845	100
GOTERM_BP_FAT	GO:0030030~cell projection organization	4	2.1164	0.755095	ACTB, KIF5C, APBB1, MYH10	145	368	13528	1.01409	1	0.999934	100
Annotation Cluster 33	Enrichment Score: 0.33564332474451497
Category	Term	Count	%	PValue	Genes	List Total	Pop Hits	Pop Total	Fold Enrichment	Bonferroni	Benjamini	FDR
GOTERM_BP_FAT	GO:0048705~skeletal system morphogenesis	3	1.5873	0.335193	TBX15, HOXD4, PRKRA	145	112	13528	2.49901	1	0.998518	99.854
GOTERM_BP_FAT	GO:0048598~embryonic morphogenesis	5	2.6455	0.413527	TBX15, HOXD4, PRKRA, CYP26B1, AMOT	145	307	13528	1.51949	1	0.998538	99.9803
GOTERM_BP_FAT	GO:0048562~embryonic organ morphogenesis	3	1.5873	0.415041	TBX15, HOXD4, PRKRA	145	133	13528	2.10443	1	0.998478	99.9811
GOTERM_BP_FAT	GO:0048568~embryonic organ development	3	1.5873	0.549138	TBX15, HOXD4, PRKRA	145	172	13528	1.62727	1	0.999245	99.9997
GOTERM_BP_FAT	GO:0001501~skeletal system development	4	2.1164	0.664066	TBX15, HOXD4, PRKRA, LECT2	145	319	13528	1.16986	1	0.999761	100
Annotation Cluster 34	Enrichment Score: 0.3333870945067357
Category	Term	Count	%	PValue	Genes	List Total	Pop Hits	Pop Total	Fold Enrichment	Bonferroni	Benjamini	FDR
GOTERM_BP_FAT	GO:0006813~potassium ion transport	4	2.1164	0.242723	KCTD10, ATP1B3, SLC24A5, KCNK3	145	160	13528	2.33241	1	0.998516	98.8281
SP_PIR_KEYWORDS	potassium transport	3	1.5873	0.310091	ATP1B3, SLC24A5, KCNK3	189	115	19235	2.65493	1	0.989237	99.2863
SP_PIR_KEYWORDS	potassium	3	1.5873	0.349398	ATP1B3, SLC24A5, KCNK3	189	126	19235	2.42315	1	0.990578	99.6732
GOTERM_MF_FAT	GO:0030955~potassium ion binding	3	1.5873	0.381769	ATP1B3, SLC24A5, KCNK3	135	128	12983	2.25399	1	0.999586	99.8499
GOTERM_BP_FAT	GO:0015672~monovalent inorganic cation transport	5	2.6455	0.439784	KCTD10, COX3, ATP1B3, SLC24A5, KCNK3	145	318	13528	1.46693	1	0.998608	99.9906
GOTERM_BP_FAT	GO:0006812~cation transport	7	3.7037	0.539702	KCTD10, COX3, ATP1B3, CAMK2G, SLC41A3, SLC24A5, KCNK3	145	553	13528	1.18097	1	0.999237	99.9996
GOTERM_BP_FAT	GO:0006811~ion transport	9	4.7619	0.576737	KCTD10, COX3, ATP1B3, CAMK2G, SLC41A3, SLC24A5, SLC22A20, MCOLN2, KCNK3	145	768	13528	1.09332	1	0.999421	99.9999
SP_PIR_KEYWORDS	ion transport	6	3.1746	0.670231	COX3, ATP1B3, SLC24A5, SLC22A20, MCOLN2, KCNK3	189	578	19235	1.05646	1	0.995561	100
GOTERM_MF_FAT	GO:0031420~alkali metal ion binding	3	1.5873	0.685477	ATP1B3, SLC24A5, KCNK3	135	228	12983	1.2654	1	0.99971	100
GOTERM_BP_FAT	GO:0030001~metal ion transport	5	2.6455	0.734209	KCTD10, ATP1B3, CAMK2G, SLC24A5, KCNK3	145	465	13528	1.00319	1	0.999918	100
Annotation Cluster 35	Enrichment Score: 0.3323125395529066
Category	Term	Count	%	PValue	Genes	List Total	Pop Hits	Pop Total	Fold Enrichment	Bonferroni	Benjamini	FDR
GOTERM_BP_FAT	GO:0008624~induction of apoptosis by extracellular signals	3	1.5873	0.335193	APH1A, AATF, CD5	145	112	13528	2.49901	1	0.998518	99.854
GOTERM_BP_FAT	GO:0043067~regulation of programmed cell death	11	5.82011	0.363909	ERCC5, APH1A, CUL4A, PLCG2, PRKRA, ACTN1, AATF, IL6R, APBB1, ANXA4, CD5	145	812	13528	1.26387	1	0.998315	99.928
GOTERM_BP_FAT	GO:0010941~regulation of cell death	11	5.82011	0.368236	ERCC5, APH1A, CUL4A, PLCG2, PRKRA, ACTN1, AATF, IL6R, APBB1, ANXA4, CD5	145	815	13528	1.25922	1	0.998339	99.9354
GOTERM_BP_FAT	GO:0006917~induction of apoptosis	5	2.6455	0.444524	APH1A, CUL4A, PRKRA, AATF, CD5	145	320	13528	1.45776	1	0.998647	99.9918
GOTERM_BP_FAT	GO:0012502~induction of programmed cell death	5	2.6455	0.44689	APH1A, CUL4A, PRKRA, AATF, CD5	145	321	13528	1.45322	1	0.99862	99.9923
GOTERM_BP_FAT	GO:0043065~positive regulation of apoptosis	6	3.1746	0.484789	APH1A, CUL4A, PRKRA, AATF, APBB1, CD5	145	430	13528	1.30181	1	0.99898	99.9975
GOTERM_BP_FAT	GO:0042981~regulation of apoptosis	10	5.29101	0.487605	ERCC5, APH1A, CUL4A, PRKRA, ACTN1, AATF, IL6R, APBB1, ANXA4, CD5	145	804	13528	1.1604	1	0.998905	99.9977
GOTERM_BP_FAT	GO:0043068~positive regulation of programmed cell death	6	3.1746	0.490916	APH1A, CUL4A, PRKRA, AATF, APBB1, CD5	145	433	13528	1.29279	1	0.998765	99.998
GOTERM_BP_FAT	GO:0010942~positive regulation of cell death	6	3.1746	0.494986	APH1A, CUL4A, PRKRA, AATF, APBB1, CD5	145	435	13528	1.28685	1	0.998788	99.9982
GOTERM_BP_FAT	GO:0042127~regulation of cell proliferation	6	3.1746	0.927136	CUL4A, PRKRA, IL6R, KRT4, MCTS1, CD5	145	787	13528	0.711282	1	1	100
Annotation Cluster 36	Enrichment Score: 0.331340833880192
Category	Term	Count	%	PValue	Genes	List Total	Pop Hits	Pop Total	Fold Enrichment	Bonferroni	Benjamini	FDR
INTERPRO	IPR011992:EF-Hand type	5	2.6455	0.227476	MYL6, CALML4, SPARCL1, ACTN1, S100A14	173	236	16659	2.04014	1	1	97.4514
UP_SEQ_FEATURE	domain:EF-hand 1	4	2.1164	0.266031	MYL6, CALML4, ACTN1, S100A14	189	182	19113	2.22257	1	1	99.0031
INTERPRO	IPR018249:EF-HAND 2	4	2.1164	0.384554	MYL6, CALML4, SPARCL1, ACTN1	173	215	16659	1.79153	1	1	99.8994
INTERPRO	IPR002048:Calcium-binding EF-hand	3	1.5873	0.435827	MYL6, CALML4, ACTN1	173	143	16659	2.02017	1	1	99.9708
SMART	SM00054:EFh	3	1.5873	0.437753	MYL6, CALML4, ACTN1	95	143	9079	2.00493	1	1	99.8653
UP_SEQ_FEATURE	domain:EF-hand 2	3	1.5873	0.536129	MYL6, CALML4, ACTN1	189	182	19113	1.66693	1	1	99.9989
INTERPRO	IPR018247:EF-HAND 1	3	1.5873	0.658651	SPARCL1, ACTN1, S100A14	173	217	16659	1.33126	1	1	100
GOTERM_MF_FAT	GO:0005509~calcium ion binding	9	4.7619	0.740637	MYL6, CALML4, LDLR, SPARCL1, PLCG2, SLC24A5, ACTN1, S100A14, ANXA4	135	919	12983	0.941821	1	0.999777	100
SP_PIR_KEYWORDS	calcium	6	3.1746	0.897495	SPARCL1, PLCG2, SLC24A5, ACTN1, S100A14, ANXA4	189	803	19235	0.760442	1	0.999893	100
Annotation Cluster 37	Enrichment Score: 0.318006976657256
Category	Term	Count	%	PValue	Genes	List Total	Pop Hits	Pop Total	Fold Enrichment	Bonferroni	Benjamini	FDR
GOTERM_BP_FAT	GO:0051270~regulation of cell motion	4	2.1164	0.338204	LAMA4, AMOT, ACTN1, IL6R	145	193	13528	1.93361	1	0.998341	99.8642
GOTERM_BP_FAT	GO:0030334~regulation of cell migration	3	1.5873	0.539603	LAMA4, AMOT, IL6R	145	169	13528	1.65615	1	0.999281	99.9996
GOTERM_BP_FAT	GO:0040012~regulation of locomotion	3	1.5873	0.609153	LAMA4, AMOT, IL6R	145	192	13528	1.45776	1	0.999556	100
Annotation Cluster 38	Enrichment Score: 0.3143329302646849
Category	Term	Count	%	PValue	Genes	List Total	Pop Hits	Pop Total	Fold Enrichment	Bonferroni	Benjamini	FDR
GOTERM_BP_FAT	GO:0051094~positive regulation of developmental process	5	2.6455	0.343447	TNFRSF12A, HPS4, AMOT, RHOB, IL6R	145	278	13528	1.678	1	0.998246	99.8805
GOTERM_BP_FAT	GO:0001568~blood vessel development	4	2.1164	0.485748	LAMA4, TNFRSF12A, AMOT, RHOB	145	245	13528	1.52321	1	0.998933	99.9976
GOTERM_BP_FAT	GO:0001944~vasculature development	4	2.1164	0.501864	LAMA4, TNFRSF12A, AMOT, RHOB	145	251	13528	1.4868	1	0.998875	99.9986
GOTERM_BP_FAT	GO:0048514~blood vessel morphogenesis	3	1.5873	0.660406	TNFRSF12A, AMOT, RHOB	145	211	13528	1.32649	1	0.999755	100
Annotation Cluster 39	Enrichment Score: 0.2882450230484562
Category	Term	Count	%	PValue	Genes	List Total	Pop Hits	Pop Total	Fold Enrichment	Bonferroni	Benjamini	FDR
GOTERM_BP_FAT	GO:0016568~chromatin modification	5	2.6455	0.333767	CSRP2BP, SETMAR, DNMT1, APBB1, RERE	145	274	13528	1.70249	1	0.998736	99.8489
GOTERM_BP_FAT	GO:0006325~chromatin organization	5	2.6455	0.575008	CSRP2BP, SETMAR, DNMT1, APBB1, RERE	145	378	13528	1.23408	1	0.999434	99.9999
GOTERM_BP_FAT	GO:0051276~chromosome organization	6	3.1746	0.592209	CSRP2BP, SETMAR, DNMT1, TERF2IP, APBB1, RERE	145	485	13528	1.15418	1	0.999527	99.9999
SP_PIR_KEYWORDS	chromatin regulator	3	1.5873	0.618626	SETMAR, DNMT1, APBB1	189	213	19235	1.43342	1	0.994115	99.9997
Annotation Cluster 40	Enrichment Score: 0.28482978010713655
Category	Term	Count	%	PValue	Genes	List Total	Pop Hits	Pop Total	Fold Enrichment	Bonferroni	Benjamini	FDR
GOTERM_MF_FAT	GO:0046872~metal ion binding	46	24.3386	0.367116	MYL6, SOLH, ADAMTSL1, LDLR, ATP1B3, PDLIM3, SP110, TRIM72, RLIM, PSPH, ZNF618, ZFC3H1, ZNF350, ERCC5, MAP3K3, CALML4, CYP26B1, SETMAR, PIKFYVE, LOXL1, HPD, INO80B, NQO2, CCNB1IP1, ZDHHC1, TRIP4, B3GALT2, SPARCL1, SLC24A5, ZBTB41, TRIM26, ACTN1, SIRT6, CSRP2, PPP1CC, S100A14, ANXA4, CYB561, KCNK3, PPM1G, HARBI1, PGM5, PLCG2, DNMT1, RERE, NEK7	135	4140	12983	1.06856	1	0.999591	99.794
SP_PIR_KEYWORDS	metal-binding	32	16.9312	0.376293	SOLH, PDLIM3, SP110, RLIM, TRIM72, ZNF618, ZFC3H1, ERCC5, ZNF350, MAP3K3, CYP26B1, SETMAR, PIKFYVE, LOXL1, INO80B, NQO2, HPD, CCNB1IP1, ZDHHC1, TRIP4, ZBTB41, TRIM26, SIRT6, PPP1CC, CSRP2, CYB561, PPM1G, HARBI1, PGM5, DNMT1, RERE, NEK7	189	2972	19235	1.0958	1	0.990054	99.8137
GOTERM_MF_FAT	GO:0043169~cation binding	46	24.3386	0.395814	MYL6, SOLH, ADAMTSL1, LDLR, ATP1B3, PDLIM3, SP110, TRIM72, RLIM, PSPH, ZNF618, ZFC3H1, ZNF350, ERCC5, MAP3K3, CALML4, CYP26B1, SETMAR, PIKFYVE, LOXL1, HPD, INO80B, NQO2, CCNB1IP1, ZDHHC1, TRIP4, B3GALT2, SPARCL1, SLC24A5, ZBTB41, TRIM26, ACTN1, SIRT6, CSRP2, PPP1CC, S100A14, ANXA4, CYB561, KCNK3, PPM1G, HARBI1, PGM5, PLCG2, DNMT1, RERE, NEK7	135	4179	12983	1.05859	1	0.999579	99.89
GOTERM_MF_FAT	GO:0043167~ion binding	46	24.3386	0.442358	MYL6, SOLH, ADAMTSL1, LDLR, ATP1B3, PDLIM3, SP110, TRIM72, RLIM, PSPH, ZNF618, ZFC3H1, ZNF350, ERCC5, MAP3K3, CALML4, CYP26B1, SETMAR, PIKFYVE, LOXL1, HPD, INO80B, NQO2, CCNB1IP1, ZDHHC1, TRIP4, B3GALT2, SPARCL1, SLC24A5, ZBTB41, TRIM26, ACTN1, SIRT6, CSRP2, PPP1CC, S100A14, ANXA4, CYB561, KCNK3, PPM1G, HARBI1, PGM5, PLCG2, DNMT1, RERE, NEK7	135	4241	12983	1.04311	1	0.999484	99.9628
GOTERM_MF_FAT	GO:0046914~transition metal ion binding	29	15.3439	0.596607	SOLH, ADAMTSL1, PDLIM3, SP110, RLIM, TRIM72, ZNF618, ZFC3H1, ZNF350, SETMAR, PIKFYVE, CYP26B1, LOXL1, INO80B, NQO2, HPD, CCNB1IP1, ZDHHC1, TRIP4, B3GALT2, ZBTB41, TRIM26, SIRT6, PPP1CC, CSRP2, CYB561, PPM1G, DNMT1, RERE	135	2785	12983	1.00141	1	0.999825	99.9995
SP_PIR_KEYWORDS	zinc	21	11.1111	0.660272	CCNB1IP1, ZDHHC1, SOLH, TRIP4, PDLIM3, ZBTB41, TRIM26, SIRT6, SP110, PPP1CC, TRIM72, RLIM, CSRP2, ZNF618, ZFC3H1, ZNF350, PIKFYVE, DNMT1, RERE, INO80B, NQO2	189	2189	19235	0.976346	1	0.99572	99.9999
SP_PIR_KEYWORDS	zinc-finger	16	8.46561	0.714216	CCNB1IP1, ZDHHC1, SOLH, TRIP4, ZBTB41, TRIM26, SP110, RLIM, TRIM72, ZNF618, ZFC3H1, ZNF350, PIKFYVE, DNMT1, RERE, INO80B	189	1718	19235	0.947823	1	0.997561	100
GOTERM_MF_FAT	GO:0008270~zinc ion binding	22	11.6402	0.773617	CCNB1IP1, ZDHHC1, SOLH, TRIP4, ADAMTSL1, PDLIM3, ZBTB41, TRIM26, SIRT6, SP110, TRIM72, RLIM, CSRP2, ZNF618, ZFC3H1, ZNF350, PIKFYVE, SETMAR, DNMT1, RERE, INO80B, NQO2	135	2311	12983	0.915512	1	0.999865	100
Annotation Cluster 41	Enrichment Score: 0.2586018361784037
Category	Term	Count	%	PValue	Genes	List Total	Pop Hits	Pop Total	Fold Enrichment	Bonferroni	Benjamini	FDR
GOTERM_BP_FAT	GO:0007049~cell cycle	11	5.82011	0.312711	PPM1G, CSRP2BP, CUL4A, MDC1, CAMK2G, CYP26B1, PPP1CC, PES1, APBB1, MCTS1, MYH10	145	776	13528	1.3225	1	0.99919	99.7515
GOTERM_BP_FAT	GO:0022402~cell cycle process	8	4.2328	0.395976	PPM1G, CSRP2BP, CUL4A, CAMK2G, CYP26B1, PES1, APBB1, MYH10	145	565	13528	1.32101	1	0.998541	99.9685
GOTERM_BP_FAT	GO:0022403~cell cycle phase	4	2.1164	0.821587	CUL4A, CAMK2G, CYP26B1, PES1	145	414	13528	0.901416	1	0.999985	100
GOTERM_BP_FAT	GO:0000278~mitotic cell cycle	3	1.5873	0.908086	CUL4A, CAMK2G, PES1	145	370	13528	0.756459	1	0.999999	100
Annotation Cluster 42	Enrichment Score: 0.2574536529568157
Category	Term	Count	%	PValue	Genes	List Total	Pop Hits	Pop Total	Fold Enrichment	Bonferroni	Benjamini	FDR
SP_PIR_KEYWORDS	ubl conjugation	8	4.2328	0.352264	CCNB1IP1, SNCAIP, CUL4A, DNMT1, EIF3I, EPOR, RPS20, PES1	189	588	19235	1.38466	1	0.989373	99.6918
UP_SEQ_FEATURE	cross-link:Glycyl lysine isopeptide (Lys-Gly) (interchain with G-Cter in ubiquitin)	3	1.5873	0.583568	CUL4A, EIF3I, RPS20	189	199	19113	1.52453	1	1	99.9998
SP_PIR_KEYWORDS	isopeptide bond	3	1.5873	0.821636	CUL4A, EIF3I, RPS20	189	319	19235	0.957108	1	0.999338	100
Annotation Cluster 43	Enrichment Score: 0.23638432585799127
Category	Term	Count	%	PValue	Genes	List Total	Pop Hits	Pop Total	Fold Enrichment	Bonferroni	Benjamini	FDR
GOTERM_BP_FAT	GO:0043067~regulation of programmed cell death	11	5.82011	0.363909	ERCC5, APH1A, CUL4A, PLCG2, PRKRA, ACTN1, AATF, IL6R, APBB1, ANXA4, CD5	145	812	13528	1.26387	1	0.998315	99.928
GOTERM_BP_FAT	GO:0010941~regulation of cell death	11	5.82011	0.368236	ERCC5, APH1A, CUL4A, PLCG2, PRKRA, ACTN1, AATF, IL6R, APBB1, ANXA4, CD5	145	815	13528	1.25922	1	0.998339	99.9354
GOTERM_BP_FAT	GO:0043069~negative regulation of programmed cell death	4	2.1164	0.740001	ERCC5, PLCG2, AATF, ANXA4	145	359	13528	1.03952	1	0.999926	100
GOTERM_BP_FAT	GO:0060548~negative regulation of cell death	4	2.1164	0.741713	ERCC5, PLCG2, AATF, ANXA4	145	360	13528	1.03663	1	0.999925	100
GOTERM_BP_FAT	GO:0043066~negative regulation of apoptosis	3	1.5873	0.894316	ERCC5, AATF, ANXA4	145	354	13528	0.790649	1	0.999998	100
Annotation Cluster 44	Enrichment Score: 0.23454843677085163
Category	Term	Count	%	PValue	Genes	List Total	Pop Hits	Pop Total	Fold Enrichment	Bonferroni	Benjamini	FDR
UP_SEQ_FEATURE	lipid moiety-binding region:S-palmitoyl cysteine	3	1.5873	0.531597	RHOB, CD151, RHO	189	181	19113	1.67614	1	1	99.9988
SP_PIR_KEYWORDS	lipoprotein	7	3.7037	0.60165	LDLR, CNTN6, RHOB, RAP1A, CD151, NELF, RHO	189	642	19235	1.10967	1	0.993832	99.9995
SP_PIR_KEYWORDS	palmitate	3	1.5873	0.618626	RHOB, CD151, RHO	189	213	19235	1.43342	1	0.994115	99.9997
Annotation Cluster 45	Enrichment Score: 0.19752658105683674
Category	Term	Count	%	PValue	Genes	List Total	Pop Hits	Pop Total	Fold Enrichment	Bonferroni	Benjamini	FDR
GOTERM_CC_FAT	GO:0044459~plasma membrane part	26	13.7566	0.3204	GJA10, TLN1, STX8, SEC31A, ATP1B3, LDLR, APH1A, AP3S1, CD151, RABAC1, MDC1, PPL, CD5, LY75, ACTN1, IL6R, CYB561, ARHGAP26, KCNK3, KCTD10, PGM5, CCR2, AMOT, EPOR, IGFBP2, RHO	132	2203	12782	1.14284	1	0.881451	99.3678
GOTERM_CC_FAT	GO:0005887~integral to plasma membrane	14	7.40741	0.445068	LY75, STX8, ATP1B3, LDLR, APH1A, IL6R, CD151, CYB561, KCNK3, KCTD10, CCR2, EPOR, CD5, RHO	132	1188	12782	1.14113	1	0.932167	99.9556
GOTERM_CC_FAT	GO:0031226~intrinsic to plasma membrane	14	7.40741	0.47837	LY75, STX8, ATP1B3, LDLR, APH1A, IL6R, CD151, CYB561, KCNK3, KCTD10, CCR2, EPOR, CD5, RHO	132	1215	12782	1.11578	1	0.940824	99.9803
UP_SEQ_FEATURE	topological domain:Cytoplasmic	25	13.2275	0.972692	GJA10, SLC16A13, MFNG, STX8, ATP1B3, LDLR, TNFRSF12A, CD151, RABAC1, OR10G6, IZUMO1, CD5, LY75, B3GALT2, GOLT1B, SLC24A5, SLC22A20, IL6R, CYB561, KCNK3, KIAA0922, CCR2, EPOR, PMEPA1, RHO	189	3374	19113	0.749311	1	1	100
UP_SEQ_FEATURE	topological domain:Extracellular	18	9.52381	0.9881	LY75, GJA10, SLC16A13, ATP1B3, LDLR, TNFRSF12A, SLC24A5, SLC22A20, IL6R, CD151, OR10G6, KIAA0922, CCR2, EPOR, IZUMO1, CD5, PMEPA1, RHO	189	2719	19113	0.669469	1	1	100
SP_PIR_KEYWORDS	receptor	8	4.2328	0.99582	LY75, OR10G6, LDLR, TNFRSF12A, CCR2, EPOR, IL6R, RHO	189	1583	19235	0.514327	1	1	100
Annotation Cluster 46	Enrichment Score: 0.195718522967066
Category	Term	Count	%	PValue	Genes	List Total	Pop Hits	Pop Total	Fold Enrichment	Bonferroni	Benjamini	FDR
SP_PIR_KEYWORDS	rna-binding	6	3.1746	0.610875	RBM3, SKIV2L, PRKRA, CPNE1, RPL12, SF3B4	189	540	19235	1.13081	1	0.994032	99.9997
INTERPRO	IPR000504:RNA recognition motif, RNP-1	3	1.5873	0.643516	RBM3, CPNE1, SF3B4	173	211	16659	1.36912	1	1	100
SMART	SM00360:RRM	3	1.5873	0.646584	RBM3, CPNE1, SF3B4	95	211	9079	1.35879	1	1	99.9993
INTERPRO	IPR012677:Nucleotide-binding, alpha-beta plait	3	1.5873	0.648619	RBM3, CPNE1, SF3B4	173	213	16659	1.35626	1	1	100
Annotation Cluster 47	Enrichment Score: 0.1929895485388294
Category	Term	Count	%	PValue	Genes	List Total	Pop Hits	Pop Total	Fold Enrichment	Bonferroni	Benjamini	FDR
SP_PIR_KEYWORDS	lipoprotein	7	3.7037	0.60165	LDLR, CNTN6, RHOB, RAP1A, CD151, NELF, RHO	189	642	19235	1.10967	1	0.993832	99.9995
UP_SEQ_FEATURE	propeptide:Removed in mature form	3	1.5873	0.661291	CNTN6, RHOB, RAP1A	189	229	19113	1.32481	1	1	100
GOTERM_CC_FAT	GO:0031225~anchored to membrane	3	1.5873	0.662667	CNTN6, RHOB, RAP1A	132	220	12782	1.32045	1	0.980645	99.9999
Annotation Cluster 48	Enrichment Score: 0.18279723432941747
Category	Term	Count	%	PValue	Genes	List Total	Pop Hits	Pop Total	Fold Enrichment	Bonferroni	Benjamini	FDR
GOTERM_CC_FAT	GO:0000267~cell fraction	13	6.87831	0.43307	ACTB, TALDO1, HPS4, HMGCS1, GYG1, CD151, PLCG2, CCR2, CYP26B1, YWHAQ, HSD11B2, RHOB, YRDC	132	1083	12782	1.16236	1	0.92853	99.9413
GOTERM_CC_FAT	GO:0005792~microsome	3	1.5873	0.702236	TALDO1, CYP26B1, HSD11B2	132	237	12782	1.22574	1	0.985362	100
GOTERM_CC_FAT	GO:0042598~vesicular fraction	3	1.5873	0.717384	TALDO1, CYP26B1, HSD11B2	132	244	12782	1.19057	1	0.98708	100
GOTERM_CC_FAT	GO:0005624~membrane fraction	8	4.2328	0.730699	TALDO1, PLCG2, HPS4, CYP26B1, HSD11B2, RHOB, YRDC, CD151	132	809	12782	0.957561	1	0.987732	100
GOTERM_CC_FAT	GO:0005626~insoluble fraction	8	4.2328	0.764683	TALDO1, PLCG2, HPS4, CYP26B1, HSD11B2, RHOB, YRDC, CD151	132	839	12782	0.923321	1	0.991709	100
Annotation Cluster 49	Enrichment Score: 0.17622448409197405
Category	Term	Count	%	PValue	Genes	List Total	Pop Hits	Pop Total	Fold Enrichment	Bonferroni	Benjamini	FDR
GOTERM_MF_FAT	GO:0030695~GTPase regulator activity	5	2.6455	0.603551	MAP4K3, RABEP2, GPSM2, EPOR, ARHGAP26	135	404	12983	1.19023	1	0.999758	99.9996
GOTERM_MF_FAT	GO:0060589~nucleoside-triphosphatase regulator activity	5	2.6455	0.620987	MAP4K3, RABEP2, GPSM2, EPOR, ARHGAP26	135	413	12983	1.16429	1	0.999744	99.9998
GOTERM_MF_FAT	GO:0005096~GTPase activator activity	3	1.5873	0.666404	RABEP2, GPSM2, ARHGAP26	135	220	12983	1.31141	1	0.99979	100
GOTERM_MF_FAT	GO:0008047~enzyme activator activity	4	2.1164	0.67624	RABEP2, PRKRA, GPSM2, ARHGAP26	135	335	12983	1.1483	1	0.999702	100
GOTERM_MF_FAT	GO:0005083~small GTPase regulator activity	3	1.5873	0.778471	MAP4K3, EPOR, ARHGAP26	135	274	12983	1.05296	1	0.999861	100
Annotation Cluster 50	Enrichment Score: 0.17365287439606847
Category	Term	Count	%	PValue	Genes	List Total	Pop Hits	Pop Total	Fold Enrichment	Bonferroni	Benjamini	FDR
SP_PIR_KEYWORDS	atp-binding	15	7.93651	0.422304	ACTB, CAMK2G, SKIV2L, KIF5C, PI4KB, MMAA, MAP4K3, DHX29, ORC4L, MAP3K3, PIKFYVE, HSPA14, CBWD7, MYH10, NEK7	189	1326	19235	1.15127	1	0.988505	99.9328
UP_SEQ_FEATURE	nucleotide phosphate-binding region:ATP	11	5.82011	0.475108	MAP4K3, ORC4L, MAP3K3, DHX29, CAMK2G, SKIV2L, KIF5C, CBWD7, MYH10, NEK7, MMAA	189	962	19113	1.15634	1	1	99.9933
SP_PIR_KEYWORDS	nucleotide-binding	17	8.99471	0.587183	ACTB, CAMK2G, SKIV2L, KIF5C, PI4KB, MMAA, MAP4K3, DHX29, ORC4L, MAP3K3, PIKFYVE, RAP1A, RHOB, HSPA14, CBWD7, MYH10, NEK7	189	1686	19235	1.02618	1	0.994398	99.9992
GOTERM_MF_FAT	GO:0005524~ATP binding	15	7.93651	0.673491	ACTB, CAMK2G, SKIV2L, KIF5C, PI4KB, MMAA, MAP4K3, DHX29, ORC4L, MAP3K3, PIKFYVE, HSPA14, CBWD7, MYH10, NEK7	135	1477	12983	0.976679	1	0.999783	100
GOTERM_MF_FAT	GO:0032559~adenyl ribonucleotide binding	15	7.93651	0.693243	ACTB, CAMK2G, SKIV2L, KIF5C, PI4KB, MMAA, MAP4K3, DHX29, ORC4L, MAP3K3, PIKFYVE, HSPA14, CBWD7, MYH10, NEK7	135	1497	12983	0.963631	1	0.99971	100
GOTERM_MF_FAT	GO:0001883~purine nucleoside binding	16	8.46561	0.695212	ACTB, CAMK2G, SKIV2L, KIF5C, PI4KB, MMAA, MAP4K3, DHX29, ORC4L, MAP3K3, PIKFYVE, RHOB, HSPA14, CBWD7, MYH10, NEK7	135	1601	12983	0.961103	1	0.999671	100
GOTERM_MF_FAT	GO:0001882~nucleoside binding	16	8.46561	0.70546	ACTB, CAMK2G, SKIV2L, KIF5C, PI4KB, MMAA, MAP4K3, DHX29, ORC4L, MAP3K3, PIKFYVE, RHOB, HSPA14, CBWD7, MYH10, NEK7	135	1612	12983	0.954545	1	0.999691	100
GOTERM_MF_FAT	GO:0000166~nucleotide binding	22	11.6402	0.724943	ACTB, SKIV2L, CAMK2G, RBM3, KIF5C, SIRT6, PI4KB, SF3B4, MMAA, MAP4K3, MAP3K3, DHX29, ORC4L, PIKFYVE, CPNE1, RHOB, HSD11B2, RAP1A, HSPA14, CBWD7, MYH10, NEK7	135	2245	12983	0.942427	1	0.999767	100
GOTERM_MF_FAT	GO:0030554~adenyl nucleotide binding	15	7.93651	0.765124	ACTB, CAMK2G, SKIV2L, KIF5C, PI4KB, MMAA, MAP4K3, DHX29, ORC4L, MAP3K3, PIKFYVE, HSPA14, CBWD7, MYH10, NEK7	135	1577	12983	0.914747	1	0.999858	100
GOTERM_MF_FAT	GO:0032555~purine ribonucleotide binding	17	8.99471	0.802998	ACTB, CAMK2G, SKIV2L, KIF5C, PI4KB, MMAA, MAP4K3, DHX29, ORC4L, MAP3K3, PIKFYVE, RAP1A, RHOB, HSPA14, CBWD7, MYH10, NEK7	135	1836	12983	0.890466	1	0.999886	100
GOTERM_MF_FAT	GO:0032553~ribonucleotide binding	17	8.99471	0.802998	ACTB, CAMK2G, SKIV2L, KIF5C, PI4KB, MMAA, MAP4K3, DHX29, ORC4L, MAP3K3, PIKFYVE, RAP1A, RHOB, HSPA14, CBWD7, MYH10, NEK7	135	1836	12983	0.890466	1	0.999886	100
GOTERM_MF_FAT	GO:0017076~purine nucleotide binding	17	8.99471	0.854482	ACTB, CAMK2G, SKIV2L, KIF5C, PI4KB, MMAA, MAP4K3, DHX29, ORC4L, MAP3K3, PIKFYVE, RAP1A, RHOB, HSPA14, CBWD7, MYH10, NEK7	135	1918	12983	0.852396	1	0.99997	100
Annotation Cluster 51	Enrichment Score: 0.16133733359808952
Category	Term	Count	%	PValue	Genes	List Total	Pop Hits	Pop Total	Fold Enrichment	Bonferroni	Benjamini	FDR
INTERPRO	IPR017907:Zinc finger, RING-type, conserved site	4	2.1164	0.558306	CCNB1IP1, TRIM26, TRIM72, RLIM	173	280	16659	1.37564	1	1	99.9991
UP_SEQ_FEATURE	zinc finger region:RING-type	3	1.5873	0.614374	TRIM26, TRIM72, RLIM	189	210	19113	1.44467	1	1	99.9999
INTERPRO	IPR018957:Zinc finger, C3HC4 RING-type	3	1.5873	0.685066	TRIM26, TRIM72, RLIM	173	228	16659	1.26704	1	1	100
INTERPRO	IPR001841:Zinc finger, RING-type	3	1.5873	0.813245	TRIM26, TRIM72, RLIM	173	296	16659	0.975961	1	1	100
SMART	SM00184:RING	3	1.5873	0.816684	TRIM26, TRIM72, RLIM	95	296	9079	0.968599	1	1	100
Annotation Cluster 52	Enrichment Score: 0.15456892465685626
Category	Term	Count	%	PValue	Genes	List Total	Pop Hits	Pop Total	Fold Enrichment	Bonferroni	Benjamini	FDR
GOTERM_BP_FAT	GO:0007204~elevation of cytosolic calcium ion concentration	3	1.5873	0.3274	CCR2, PLCG2, EPOR	145	110	13528	2.54445	1	0.999023	99.8241
GOTERM_BP_FAT	GO:0051480~cytosolic calcium ion homeostasis	3	1.5873	0.358408	CCR2, PLCG2, EPOR	145	118	13528	2.37195	1	0.998519	99.9173
GOTERM_BP_FAT	GO:0006874~cellular calcium ion homeostasis	3	1.5873	0.582916	CCR2, PLCG2, EPOR	145	183	13528	1.52945	1	0.999459	99.9999
GOTERM_BP_FAT	GO:0055074~calcium ion homeostasis	3	1.5873	0.597648	CCR2, PLCG2, EPOR	145	188	13528	1.48877	1	0.999525	100
GOTERM_BP_FAT	GO:0006875~cellular metal ion homeostasis	3	1.5873	0.620408	CCR2, PLCG2, EPOR	145	196	13528	1.42801	1	0.99956	100
GOTERM_BP_FAT	GO:0055065~metal ion homeostasis	3	1.5873	0.644823	CCR2, PLCG2, EPOR	145	205	13528	1.36532	1	0.999673	100
GOTERM_BP_FAT	GO:0030005~cellular di-, tri-valent inorganic cation homeostasis	3	1.5873	0.699302	CCR2, PLCG2, EPOR	145	227	13528	1.23299	1	0.999869	100
GOTERM_BP_FAT	GO:0055066~di-, tri-valent inorganic cation homeostasis	3	1.5873	0.726011	CCR2, PLCG2, EPOR	145	239	13528	1.17109	1	0.999904	100
GOTERM_BP_FAT	GO:0030003~cellular cation homeostasis	3	1.5873	0.756571	CCR2, PLCG2, EPOR	145	254	13528	1.10193	1	0.999932	100
GOTERM_BP_FAT	GO:0055080~cation homeostasis	3	1.5873	0.812106	CCR2, PLCG2, EPOR	145	286	13528	0.978635	1	0.999981	100
GOTERM_BP_FAT	GO:0006873~cellular ion homeostasis	3	1.5873	0.911259	CCR2, PLCG2, EPOR	145	374	13528	0.748368	1	0.999999	100
GOTERM_BP_FAT	GO:0048878~chemical homeostasis	4	2.1164	0.913819	LDLR, CCR2, PLCG2, EPOR	145	512	13528	0.728879	1	0.999999	100
GOTERM_BP_FAT	GO:0055082~cellular chemical homeostasis	3	1.5873	0.915827	CCR2, PLCG2, EPOR	145	380	13528	0.736552	1	0.999999	100
GOTERM_BP_FAT	GO:0050801~ion homeostasis	3	1.5873	0.934971	CCR2, PLCG2, EPOR	145	409	13528	0.684327	1	1	100
GOTERM_BP_FAT	GO:0019725~cellular homeostasis	3	1.5873	0.961286	CCR2, PLCG2, EPOR	145	466	13528	0.600622	1	1	100
GOTERM_BP_FAT	GO:0042592~homeostatic process	5	2.6455	0.962132	LDLR, CCR2, PLCG2, EPOR, TERF2IP	145	751	13528	0.621149	1	1	100
Annotation Cluster 53	Enrichment Score: 0.1513019802460363
Category	Term	Count	%	PValue	Genes	List Total	Pop Hits	Pop Total	Fold Enrichment	Bonferroni	Benjamini	FDR
UP_SEQ_FEATURE	nucleotide phosphate-binding region:ATP	11	5.82011	0.475108	MAP4K3, ORC4L, MAP3K3, DHX29, CAMK2G, SKIV2L, KIF5C, CBWD7, MYH10, NEK7, MMAA	189	962	19113	1.15634	1	1	99.9933
INTERPRO	IPR002290:Serine/threonine protein kinase	4	2.1164	0.501544	MAP4K3, MAP3K3, CAMK2G, NEK7	173	259	16659	1.48718	1	1	99.995
SMART	SM00220:S_TKc	4	2.1164	0.505128	MAP4K3, MAP3K3, CAMK2G, NEK7	95	259	9079	1.47596	1	1	99.9689
SP_PIR_KEYWORDS	kinase	8	4.2328	0.511041	WSB1, MAP4K3, MAP3K3, CAMK2G, PIKFYVE, CSNK2B, PI4KB, NEK7	189	688	19235	1.1834	1	0.991472	99.9927
GOTERM_MF_FAT	GO:0004674~protein serine/threonine kinase activity	5	2.6455	0.652602	MAP4K3, MAP3K3, CAMK2G, CSNK2B, NEK7	135	430	12983	1.11826	1	0.999809	99.9999
INTERPRO	IPR008271:Serine/threonine protein kinase, active site	4	2.1164	0.711409	MAP4K3, MAP3K3, CAMK2G, NEK7	173	354	16659	1.08808	1	1	100
GOTERM_BP_FAT	GO:0006793~phosphorus metabolic process	10	5.29101	0.716446	MAP4K3, PPM1G, COX3, MAP3K3, CAMK2G, PRKRA, PI4KB, PPP1CC, NEK7, RHO	145	973	13528	0.958855	1	0.999892	100
GOTERM_BP_FAT	GO:0006796~phosphate metabolic process	10	5.29101	0.716446	MAP4K3, PPM1G, COX3, MAP3K3, CAMK2G, PRKRA, PI4KB, PPP1CC, NEK7, RHO	145	973	13528	0.958855	1	0.999892	100
INTERPRO	IPR017442:Serine/threonine protein kinase-related	4	2.1164	0.720299	MAP4K3, MAP3K3, CAMK2G, NEK7	173	359	16659	1.07292	1	1	100
SP_PIR_KEYWORDS	serine/threonine-protein kinase	4	2.1164	0.722872	MAP4K3, MAP3K3, CAMK2G, NEK7	189	381	19235	1.06848	1	0.997676	100
GOTERM_BP_FAT	GO:0016310~phosphorylation	8	4.2328	0.755036	MAP4K3, COX3, MAP3K3, CAMK2G, PRKRA, PI4KB, NEK7, RHO	145	800	13528	0.932966	1	0.999937	100
UP_SEQ_FEATURE	active site:Proton acceptor	6	3.1746	0.779463	MAP4K3, MAP3K3, CAMK2G, HSD11B2, SIRT6, NEK7	189	658	19113	0.922131	1	1	100
UP_SEQ_FEATURE	domain:Protein kinase	4	2.1164	0.843518	MAP4K3, MAP3K3, CAMK2G, NEK7	189	469	19113	0.86249	1	1	100
GOTERM_BP_FAT	GO:0006468~protein amino acid phosphorylation	6	3.1746	0.84415	MAP4K3, MAP3K3, CAMK2G, PRKRA, NEK7, RHO	145	667	13528	0.839249	1	0.99999	100
INTERPRO	IPR017441:Protein kinase, ATP binding site	4	2.1164	0.852601	MAP4K3, MAP3K3, CAMK2G, NEK7	173	455	16659	0.846548	1	1	100
INTERPRO	IPR000719:Protein kinase, core	4	2.1164	0.873004	MAP4K3, MAP3K3, CAMK2G, NEK7	173	476	16659	0.8092	1	1	100
GOTERM_MF_FAT	GO:0004672~protein kinase activity	5	2.6455	0.877433	MAP4K3, MAP3K3, CAMK2G, CSNK2B, NEK7	135	606	12983	0.793485	1	0.999986	100
UP_SEQ_FEATURE	binding site:ATP	4	2.1164	0.904988	MAP4K3, MAP3K3, CAMK2G, NEK7	189	542	19113	0.746325	1	1	100
Annotation Cluster 54	Enrichment Score: 0.13833993816973766
Category	Term	Count	%	PValue	Genes	List Total	Pop Hits	Pop Total	Fold Enrichment	Bonferroni	Benjamini	FDR
GOTERM_BP_FAT	GO:0044265~cellular macromolecule catabolic process	9	4.7619	0.510309	WSB1, CCNB1IP1, ERCC5, XPC, UBE4A, APH1A, LDLR, CUL4A, RLIM	145	725	13528	1.15816	1	0.998988	99.9989
SP_PIR_KEYWORDS	ubl conjugation pathway	6	3.1746	0.558231	WSB1, CCNB1IP1, UBE4A, CUL4A, RLIM, PMEPA1	189	509	19235	1.19968	1	0.993173	99.9981
GOTERM_BP_FAT	GO:0009057~macromolecule catabolic process	9	4.7619	0.596031	WSB1, CCNB1IP1, ERCC5, XPC, UBE4A, APH1A, LDLR, CUL4A, RLIM	145	781	13528	1.07512	1	0.999536	99.9999
GOTERM_BP_FAT	GO:0051603~proteolysis involved in cellular protein catabolic process	6	3.1746	0.771171	WSB1, CCNB1IP1, UBE4A, APH1A, CUL4A, RLIM	145	600	13528	0.932966	1	0.999953	100
GOTERM_BP_FAT	GO:0044257~cellular protein catabolic process	6	3.1746	0.774917	WSB1, CCNB1IP1, UBE4A, APH1A, CUL4A, RLIM	145	603	13528	0.928324	1	0.999952	100
GOTERM_BP_FAT	GO:0030163~protein catabolic process	6	3.1746	0.797573	WSB1, CCNB1IP1, UBE4A, APH1A, CUL4A, RLIM	145	622	13528	0.899967	1	0.999972	100
GOTERM_BP_FAT	GO:0043632~modification-dependent macromolecule catabolic process	5	2.6455	0.865362	WSB1, CCNB1IP1, UBE4A, CUL4A, RLIM	145	574	13528	0.812688	1	0.999995	100
GOTERM_BP_FAT	GO:0019941~modification-dependent protein catabolic process	5	2.6455	0.865362	WSB1, CCNB1IP1, UBE4A, CUL4A, RLIM	145	574	13528	0.812688	1	0.999995	100
GOTERM_BP_FAT	GO:0006508~proteolysis	8	4.2328	0.938539	WSB1, CCNB1IP1, SOLH, UBE4A, APH1A, CUL4A, CFB, RLIM	145	1054	13528	0.708133	1	1	100
Annotation Cluster 55	Enrichment Score: 0.13605717705533807
Category	Term	Count	%	PValue	Genes	List Total	Pop Hits	Pop Total	Fold Enrichment	Bonferroni	Benjamini	FDR
GOTERM_BP_FAT	GO:0010740~positive regulation of protein kinase cascade	3	1.5873	0.53317	MAP3K3, GOLT1B, IL6R	145	167	13528	1.67599	1	0.99923	99.9995
GOTERM_BP_FAT	GO:0010627~regulation of protein kinase cascade	3	1.5873	0.746723	MAP3K3, GOLT1B, IL6R	145	249	13528	1.12405	1	0.99993	100
GOTERM_BP_FAT	GO:0009967~positive regulation of signal transduction	3	1.5873	0.825563	MAP3K3, GOLT1B, IL6R	145	295	13528	0.948778	1	0.999986	100
GOTERM_BP_FAT	GO:0010647~positive regulation of cell communication	3	1.5873	0.868952	MAP3K3, GOLT1B, IL6R	145	329	13528	0.850728	1	0.999995	100
Annotation Cluster 56	Enrichment Score: 0.13522721372582813
Category	Term	Count	%	PValue	Genes	List Total	Pop Hits	Pop Total	Fold Enrichment	Bonferroni	Benjamini	FDR
UP_SEQ_FEATURE	repeat:WD 5	3	1.5873	0.670567	WSB1, SEC31A, EIF3I	189	233	19113	1.30206	1	1	100
INTERPRO	IPR019782:WD40 repeat 2	3	1.5873	0.68039	WSB1, SEC31A, EIF3I	173	226	16659	1.27825	1	1	100
INTERPRO	IPR017986:WD40 repeat, region	3	1.5873	0.707614	WSB1, SEC31A, EIF3I	173	238	16659	1.2138	1	1	100
UP_SEQ_FEATURE	repeat:WD 4	3	1.5873	0.709798	WSB1, SEC31A, EIF3I	189	251	19113	1.20869	1	1	100
INTERPRO	IPR019781:WD40 repeat, subgroup	3	1.5873	0.716251	WSB1, SEC31A, EIF3I	173	242	16659	1.19374	1	1	100
UP_SEQ_FEATURE	repeat:WD 3	3	1.5873	0.737561	WSB1, SEC31A, EIF3I	189	265	19113	1.14483	1	1	100
UP_SEQ_FEATURE	repeat:WD 2	3	1.5873	0.754195	WSB1, SEC31A, EIF3I	189	274	19113	1.10723	1	1	100
UP_SEQ_FEATURE	repeat:WD 1	3	1.5873	0.754195	WSB1, SEC31A, EIF3I	189	274	19113	1.10723	1	1	100
SP_PIR_KEYWORDS	wd repeat	3	1.5873	0.754633	WSB1, SEC31A, EIF3I	189	276	19235	1.10622	1	0.998391	100
INTERPRO	IPR001680:WD40 repeat	3	1.5873	0.763693	WSB1, SEC31A, EIF3I	173	266	16659	1.08603	1	1	100
SMART	SM00320:WD40	3	1.5873	0.767122	WSB1, SEC31A, EIF3I	95	266	9079	1.07784	1	1	100
INTERPRO	IPR019775:WD40 repeat, conserved site	3	1.5873	0.783054	WSB1, SEC31A, EIF3I	173	277	16659	1.0429	1	1	100
Annotation Cluster 57	Enrichment Score: 0.1147466199822267
Category	Term	Count	%	PValue	Genes	List Total	Pop Hits	Pop Total	Fold Enrichment	Bonferroni	Benjamini	FDR
SP_PIR_KEYWORDS	mitochondrion inner membrane	3	1.5873	0.564572	COX3, SPNS1, MCART1	189	193	19235	1.58196	1	0.993068	99.9984
GOTERM_CC_FAT	GO:0031966~mitochondrial membrane	5	2.6455	0.578091	COX3, PI4KB, SPNS1, PPP1CC, MCART1	132	394	12782	1.22885	1	0.967065	99.9988
GOTERM_CC_FAT	GO:0005740~mitochondrial envelope	5	2.6455	0.626888	COX3, PI4KB, SPNS1, PPP1CC, MCART1	132	419	12782	1.15553	1	0.976061	99.9998
GOTERM_CC_FAT	GO:0005743~mitochondrial inner membrane	3	1.5873	0.825276	COX3, SPNS1, MCART1	132	306	12782	0.949346	1	0.995656	100
SP_PIR_KEYWORDS	mitochondrion	7	3.7037	0.827871	COX3, PPL, YRDC, PI4KB, SPNS1, MCART1, MMAA	189	832	19235	0.856259	1	0.999367	100
GOTERM_CC_FAT	GO:0019866~organelle inner membrane	3	1.5873	0.854883	COX3, SPNS1, MCART1	132	329	12782	0.882979	1	0.997388	100
GOTERM_CC_FAT	GO:0044429~mitochondrial part	5	2.6455	0.864868	COX3, PI4KB, SPNS1, PPP1CC, MCART1	132	595	12782	0.813725	1	0.997588	100
GOTERM_CC_FAT	GO:0005739~mitochondrion	9	4.7619	0.878001	COX3, PPL, GFER, YRDC, PI4KB, SPNS1, PPP1CC, MCART1, MMAA	132	1087	12782	0.801748	1	0.997959	100
GOTERM_CC_FAT	GO:0031967~organelle envelope	5	2.6455	0.885095	COX3, PI4KB, SPNS1, PPP1CC, MCART1	132	620	12782	0.780914	1	0.998165	100
GOTERM_CC_FAT	GO:0031975~envelope	5	2.6455	0.886595	COX3, PI4KB, SPNS1, PPP1CC, MCART1	132	622	12782	0.778403	1	0.998108	100
Annotation Cluster 58	Enrichment Score: 0.11273304271201084
Category	Term	Count	%	PValue	Genes	List Total	Pop Hits	Pop Total	Fold Enrichment	Bonferroni	Benjamini	FDR
GOTERM_CC_FAT	GO:0044421~extracellular region part	12	6.34921	0.39578	CHADL, LAMA4, CCL22, MFNG, ADAMTSL1, LDLR, SPARCL1, FGL2, IL6R, LECT2, IGFBP2, LOXL1	132	960	12782	1.21042	1	0.911741	99.8646
GOTERM_CC_FAT	GO:0005615~extracellular space	8	4.2328	0.558277	CCL22, MFNG, LDLR, FGL2, IL6R, LECT2, IGFBP2, LOXL1	132	685	12782	1.1309	1	0.962397	99.9978
SP_PIR_KEYWORDS	disulfide bond	27	14.2857	0.730434	ADAMTSL1, ATP1B3, LDLR, TNFRSF12A, GFER, TRIM72, CPN2, CHADL, OR10G6, CCL22, FGL2, IZUMO1, CD5, LY75, CFB, SPARCL1, CNTN6, CSNK2B, IL6R, PPP1CC, LAMA4, FLJ44606, SFRP2, CCR2, EPOR, IGFBP2, RHO	189	2924	19235	0.93976	1	0.99775	100
GOTERM_CC_FAT	GO:0005576~extracellular region	19	10.0529	0.769067	MFNG, TLN1, ADAMTSL1, LDLR, CFB, SPARCL1, CSNK2B, ACTN1, IL6R, CPN2, CHADL, CCL22, LAMA4, SFRP2, EPOR, FGL2, LECT2, IGFBP2, LOXL1	132	2010	12782	0.91534	1	0.991231	100
SP_PIR_KEYWORDS	Secreted	15	7.93651	0.777964	ADAMTSL1, SPARCL1, CFB, CSNK2B, IL6R, CPN2, CHADL, LAMA4, CCL22, SFRP2, EPOR, FGL2, LECT2, IGFBP2, LOXL1	189	1689	19235	0.903841	1	0.998473	100
UP_SEQ_FEATURE	disulfide bond	25	13.2275	0.807477	ADAMTSL1, ATP1B3, LDLR, TNFRSF12A, GFER, TRIM72, CHADL, OR10G6, CCL22, FGL2, IZUMO1, CD5, LY75, CFB, SPARCL1, CNTN6, CSNK2B, IL6R, LAMA4, FLJ44606, SFRP2, CCR2, EPOR, IGFBP2, RHO	189	2819	19113	0.896834	1	1	100
SP_PIR_KEYWORDS	signal	23	12.1693	0.981473	LY75, ADAMTSL1, LDLR, CFB, SPARCL1, CNTN6, TNFRSF12A, SLC24A5, CSNK2B, IL6R, CPN2, CHADL, CCL22, LAMA4, SFRP2, KIAA0922, EPOR, FGL2, IZUMO1, LECT2, IGFBP2, CD5, LOXL1	189	3250	19235	0.720236	1	0.999999	100
UP_SEQ_FEATURE	signal peptide	23	12.1693	0.983123	LY75, ADAMTSL1, LDLR, CFB, SPARCL1, CNTN6, TNFRSF12A, SLC24A5, CSNK2B, IL6R, CPN2, CHADL, CCL22, LAMA4, SFRP2, KIAA0922, EPOR, FGL2, IZUMO1, LECT2, IGFBP2, CD5, LOXL1	189	3250	19113	0.715668	1	1	100
SP_PIR_KEYWORDS	glycoprotein	30	15.873	0.993774	MFNG, ADAMTSL1, LDLR, ATP1B3, CD151, CPN2, CHADL, OR10G6, FGL2, IZUMO1, CD5, LY75, C9ORF5, B3GALT2, CFB, SPARCL1, CNTN6, CSNK2B, SLC22A20, IL6R, GYG1, ANXA4, KCNK3, LAMA4, KIAA0922, CCR2, EPOR, C19ORF6, IGFBP2, RHO	189	4318	19235	0.707081	1	1	100
UP_SEQ_FEATURE	glycosylation site:N-linked (GlcNAc...)	27	14.2857	0.997601	MFNG, ADAMTSL1, ATP1B3, LDLR, CD151, CPN2, CHADL, OR10G6, FGL2, IZUMO1, CD5, LY75, C9ORF5, B3GALT2, CFB, SPARCL1, CNTN6, CSNK2B, SLC22A20, IL6R, KCNK3, LAMA4, KIAA0922, CCR2, EPOR, C19ORF6, RHO	189	4129	19113	0.661281	1	1	100
Annotation Cluster 59	Enrichment Score: 0.10455654358216607
Category	Term	Count	%	PValue	Genes	List Total	Pop Hits	Pop Total	Fold Enrichment	Bonferroni	Benjamini	FDR
GOTERM_BP_FAT	GO:0006366~transcription from RNA polymerase II promoter	3	1.5873	0.715133	TSC22D1, TRIP4, NRL	145	234	13528	1.19611	1	0.999894	100
GOTERM_BP_FAT	GO:0006351~transcription, DNA-dependent	3	1.5873	0.821176	TSC22D1, TRIP4, NRL	145	292	13528	0.958526	1	0.999986	100
GOTERM_BP_FAT	GO:0032774~RNA biosynthetic process	3	1.5873	0.827004	TSC22D1, TRIP4, NRL	145	296	13528	0.945573	1	0.999986	100
Annotation Cluster 60	Enrichment Score: 0.10157991843553538
Category	Term	Count	%	PValue	Genes	List Total	Pop Hits	Pop Total	Fold Enrichment	Bonferroni	Benjamini	FDR
GOTERM_BP_FAT	GO:0019953~sexual reproduction	6	3.1746	0.540882	TSNAXIP1, GJA10, DNALI1, CYP26B1, GFER, IZUMO1	145	458	13528	1.22223	1	0.999209	99.9996
GOTERM_BP_FAT	GO:0007276~gamete generation	4	2.1164	0.796208	TSNAXIP1, GJA10, CYP26B1, GFER	145	395	13528	0.944775	1	0.999972	100
GOTERM_BP_FAT	GO:0007283~spermatogenesis	3	1.5873	0.843484	TSNAXIP1, CYP26B1, GFER	145	308	13528	0.908733	1	0.999991	100
GOTERM_BP_FAT	GO:0048232~male gamete generation	3	1.5873	0.843484	TSNAXIP1, CYP26B1, GFER	145	308	13528	0.908733	1	0.999991	100
GOTERM_BP_FAT	GO:0032504~multicellular organism reproduction	4	2.1164	0.89561	TSNAXIP1, GJA10, CYP26B1, GFER	145	487	13528	0.766296	1	0.999998	100
GOTERM_BP_FAT	GO:0048609~reproductive process in a multicellular organism	4	2.1164	0.89561	TSNAXIP1, GJA10, CYP26B1, GFER	145	487	13528	0.766296	1	0.999998	100
Annotation Cluster 61	Enrichment Score: 0.10009477100397668
Category	Term	Count	%	PValue	Genes	List Total	Pop Hits	Pop Total	Fold Enrichment	Bonferroni	Benjamini	FDR
INTERPRO	IPR003598:Immunoglobulin subtype 2	3	1.5873	0.62786	ADAMTSL1, CNTN6, IL6R	173	205	16659	1.40919	1	1	99.9999
SMART	SM00408:IGc2	3	1.5873	0.630859	ADAMTSL1, CNTN6, IL6R	95	205	9079	1.39856	1	1	99.9989
SP_PIR_KEYWORDS	Immunoglobulin domain	4	2.1164	0.841444	ADAMTSL1, CNTN6, IL6R, IZUMO1	189	470	19235	0.866149	1	0.9995	100
INTERPRO	IPR007110:Immunoglobulin-like	3	1.5873	0.967447	ADAMTSL1, CNTN6, IL6R	173	501	16659	0.576616	1	1	100
INTERPRO	IPR013783:Immunoglobulin-like fold	3	1.5873	0.979668	ADAMTSL1, CNTN6, IL6R	173	553	16659	0.522395	1	1	100
Annotation Cluster 62	Enrichment Score: 0.09208316595406744
Category	Term	Count	%	PValue	Genes	List Total	Pop Hits	Pop Total	Fold Enrichment	Bonferroni	Benjamini	FDR
SP_PIR_KEYWORDS	Apoptosis	4	2.1164	0.722872	TMEM85, TNFRSF12A, RHOB, APBB1	189	381	19235	1.06848	1	0.997676	100
GOTERM_BP_FAT	GO:0006915~apoptosis	6	3.1746	0.773673	TMEM85, APH1A, TNFRSF12A, RHOB, AATF, APBB1	145	602	13528	0.929866	1	0.999953	100
GOTERM_BP_FAT	GO:0012501~programmed cell death	6	3.1746	0.78468	TMEM85, APH1A, TNFRSF12A, RHOB, AATF, APBB1	145	611	13528	0.916169	1	0.999962	100
GOTERM_BP_FAT	GO:0008219~cell death	6	3.1746	0.886699	TMEM85, APH1A, TNFRSF12A, RHOB, AATF, APBB1	145	719	13528	0.778553	1	0.999998	100
GOTERM_BP_FAT	GO:0016265~death	6	3.1746	0.890217	TMEM85, APH1A, TNFRSF12A, RHOB, AATF, APBB1	145	724	13528	0.773176	1	0.999998	100
Annotation Cluster 63	Enrichment Score: 0.09164403296361112
Category	Term	Count	%	PValue	Genes	List Total	Pop Hits	Pop Total	Fold Enrichment	Bonferroni	Benjamini	FDR
GOTERM_CC_FAT	GO:0005789~endoplasmic reticulum membrane	3	1.5873	0.766319	CYP26B1, KRTCAP2, HPD	132	269	12782	1.07993	1	0.991402	100
GOTERM_CC_FAT	GO:0042175~nuclear envelope-endoplasmic reticulum network	3	1.5873	0.79204	CYP26B1, KRTCAP2, HPD	132	284	12782	1.02289	1	0.992947	100
GOTERM_CC_FAT	GO:0044432~endoplasmic reticulum part	3	1.5873	0.874806	CYP26B1, KRTCAP2, HPD	132	347	12782	0.837176	1	0.997944	100
Annotation Cluster 64	Enrichment Score: 0.06875047869952684
Category	Term	Count	%	PValue	Genes	List Total	Pop Hits	Pop Total	Fold Enrichment	Bonferroni	Benjamini	FDR
SP_PIR_KEYWORDS	Immunoglobulin domain	4	2.1164	0.841444	ADAMTSL1, CNTN6, IL6R, IZUMO1	189	470	19235	0.866149	1	0.9995	100
INTERPRO	IPR003599:Immunoglobulin subtype	3	1.5873	0.858069	ADAMTSL1, CNTN6, IZUMO1	173	330	16659	0.875407	1	1	100
SMART	SM00409:IG	3	1.5873	0.861393	ADAMTSL1, CNTN6, IZUMO1	95	330	9079	0.868804	1	1	100
Annotation Cluster 65	Enrichment Score: 0.06755954681333252
Category	Term	Count	%	PValue	Genes	List Total	Pop Hits	Pop Total	Fold Enrichment	Bonferroni	Benjamini	FDR
SP_PIR_KEYWORDS	repressor	6	3.1746	0.420208	TSC22D1, ZNF350, MNDA, DNMT1, SCMH1, RERE	189	435	19235	1.40376	1	0.990881	99.9295
GOTERM_MF_FAT	GO:0003677~DNA binding	22	11.6402	0.787215	ZDHHC1, SOLH, TBX15, ZBTB41, TRIM26, TERF2IP, SP110, ZNF618, TSC22D1, ERCC5, ZNF350, XPC, ORC4L, RPL6, NRL, HOXD4, SETMAR, MNDA, DNMT1, AATF, SCMH1, RERE	135	2331	12983	0.907657	1	0.999871	100
GOTERM_MF_FAT	GO:0003700~transcription factor activity	8	4.2328	0.884626	TSC22D1, SOLH, TBX15, NRL, HOXD4, AATF, SCMH1, RERE	135	975	12983	0.78909	1	0.999982	100
SP_PIR_KEYWORDS	transcription regulation	16	8.46561	0.901271	TBX15, TRIP4, ZBTB41, SP110, RLIM, ZNF618, TSC22D1, ZNF350, NRL, HOXD4, MNDA, DNMT1, SCMH1, APBB1, MCTS1, RERE	189	2026	19235	0.803731	1	0.999896	100
SP_PIR_KEYWORDS	Transcription	16	8.46561	0.917583	TBX15, TRIP4, ZBTB41, SP110, RLIM, ZNF618, TSC22D1, ZNF350, NRL, HOXD4, MNDA, DNMT1, SCMH1, APBB1, MCTS1, RERE	189	2071	19235	0.786267	1	0.999942	100
GOTERM_MF_FAT	GO:0030528~transcription regulator activity	12	6.34921	0.922347	TSC22D1, ZNF350, SOLH, TBX15, TRIP4, PBXIP1, NRL, HOXD4, AATF, SCMH1, RLIM, RERE	135	1512	12983	0.763257	1	0.999995	100
SP_PIR_KEYWORDS	dna-binding	14	7.40741	0.928781	TBX15, ZBTB41, SP110, ZNF618, ERCC5, ZNF350, XPC, ORC4L, RPL6, NRL, SETMAR, HOXD4, MNDA, DNMT1	189	1868	19235	0.762749	1	0.999951	100
GOTERM_BP_FAT	GO:0045449~regulation of transcription	22	11.6402	0.940804	TBX15, TRIP4, ZBTB41, SIRT6, SP110, TERF2IP, RLIM, ZNF618, TSC22D1, ZNF350, PBXIP1, RPL6, NRL, HOXD4, YWHAQ, MNDA, DNMT1, AATF, SCMH1, APBB1, MCTS1, RERE	145	2601	13528	0.789129	1	1	100
GOTERM_BP_FAT	GO:0006350~transcription	17	8.99471	0.949063	TBX15, TRIP4, ZBTB41, SP110, RLIM, PTMA, ZNF618, TSC22D1, ZNF350, NRL, HOXD4, MNDA, DNMT1, SCMH1, APBB1, MCTS1, RERE	145	2101	13528	0.754898	1	1	100
GOTERM_BP_FAT	GO:0006355~regulation of transcription, DNA-dependent	12	6.34921	0.986371	TSC22D1, ZNF350, TBX15, NRL, RPL6, HOXD4, YWHAQ, DNMT1, SIRT6, AATF, APBB1, RERE	145	1773	13528	0.631449	1	1	100
GOTERM_BP_FAT	GO:0051252~regulation of RNA metabolic process	12	6.34921	0.989429	TSC22D1, ZNF350, TBX15, NRL, RPL6, HOXD4, YWHAQ, DNMT1, SIRT6, AATF, APBB1, RERE	145	1813	13528	0.617517	1	1	100
Annotation Cluster 66	Enrichment Score: 0.06724772586206586
Category	Term	Count	%	PValue	Genes	List Total	Pop Hits	Pop Total	Fold Enrichment	Bonferroni	Benjamini	FDR
GOTERM_BP_FAT	GO:0050953~sensory perception of light stimulus	3	1.5873	0.672973	GJA10, NRL, RHO	145	216	13528	1.29579	1	0.999782	100
GOTERM_BP_FAT	GO:0007601~visual perception	3	1.5873	0.672973	GJA10, NRL, RHO	145	216	13528	1.29579	1	0.999782	100
SP_PIR_KEYWORDS	sensory transduction	4	2.1164	0.933171	OR10G6, NRL, SLC24A5, RHO	189	595	19235	0.684185	1	0.999956	100
GOTERM_BP_FAT	GO:0050877~neurological system process	9	4.7619	0.951187	GJA10, OR10G6, PLDN, NRL, APBB1, KCNK3, APBA1, MYH10, RHO	145	1210	13528	0.693941	1	1	100
GOTERM_BP_FAT	GO:0050890~cognition	5	2.6455	0.989269	GJA10, OR10G6, NRL, APBB1, RHO	145	909	13528	0.513182	1	1	100
GOTERM_BP_FAT	GO:0007600~sensory perception	4	2.1164	0.993062	GJA10, OR10G6, NRL, RHO	145	810	13528	0.460724	1	1	100
Annotation Cluster 67	Enrichment Score: 0.06659447348341828
Category	Term	Count	%	PValue	Genes	List Total	Pop Hits	Pop Total	Fold Enrichment	Bonferroni	Benjamini	FDR
GOTERM_MF_FAT	GO:0015267~channel activity	4	2.1164	0.80273	GJA10, KCTD10, MCOLN2, KCNK3	135	412	12983	0.933693	1	0.999902	100
GOTERM_MF_FAT	GO:0022803~passive transmembrane transporter activity	4	2.1164	0.80406	GJA10, KCTD10, MCOLN2, KCNK3	135	413	12983	0.931432	1	0.99987	100
GOTERM_MF_FAT	GO:0005216~ion channel activity	3	1.5873	0.911664	KCTD10, MCOLN2, KCNK3	135	386	12983	0.747438	1	0.999993	100
GOTERM_MF_FAT	GO:0022838~substrate specific channel activity	3	1.5873	0.920299	KCTD10, MCOLN2, KCNK3	135	398	12983	0.724902	1	0.999995	100
Annotation Cluster 68	Enrichment Score: 0.061139303420673245
Category	Term	Count	%	PValue	Genes	List Total	Pop Hits	Pop Total	Fold Enrichment	Bonferroni	Benjamini	FDR
GOTERM_BP_FAT	GO:0007268~synaptic transmission	3	1.5873	0.829854	PLDN, KCNK3, APBA1	145	298	13528	0.939227	1	0.999986	100
GOTERM_BP_FAT	GO:0007267~cell-cell signaling	5	2.6455	0.886959	CCL22, PLDN, CAMK2G, KCNK3, APBA1	145	600	13528	0.777471	1	0.999998	100
GOTERM_BP_FAT	GO:0019226~transmission of nerve impulse	3	1.5873	0.890588	PLDN, KCNK3, APBA1	145	350	13528	0.799685	1	0.999998	100
Annotation Cluster 69	Enrichment Score: 0.02912167641912654
Category	Term	Count	%	PValue	Genes	List Total	Pop Hits	Pop Total	Fold Enrichment	Bonferroni	Benjamini	FDR
SP_PIR_KEYWORDS	membrane	58	30.6878	0.764966	SLC16A13, TLN1, SEC31A, LDLR, ATP1B3, SLC45A1, AP3S1, CD151, NELF, RABAC1, RHOB, YRDC, IZUMO1, CAP1, MCOLN2, ZDHHC1, CNTN6, GOLT1B, SLC24A5, SLC22A20, IL6R, PI4KB, KRTCAP2, MCART1, FAM134C, CCR2, SLC41A3, C19ORF6, PMEPA1, GJA10, PLDN, MFNG, TMEM85, STX8, APH1A, TNFRSF12A, TMEM82, RABEPK, TRIM72, OR10G6, TMEM127, PPL, PIKFYVE, CYP26B1, CD5, LY75, C9ORF5, B3GALT2, TMEM93, CYB561, KCNK3, COX3, KIAA0…	189	6256	19235	0.943543	1	0.998222	100
UP_SEQ_FEATURE	transmembrane region	41	21.6931	0.932535	GJA10, SLC16A13, TMEM85, STX8, MFNG, APH1A, LDLR, ATP1B3, TNFRSF12A, SLC45A1, TMEM82, CD151, RABAC1, OR10G6, TMEM127, MCOLN2, IZUMO1, CD5, LY75, ZDHHC1, C9ORF5, B3GALT2, TMEM93, GOLT1B, SLC24A5, SLC22A20, IL6R, KRTCAP2, MCART1, CYB561, KCNK3, FAM134C, COX3, KIAA0922, SLC41A3, CCR2, EPOR, SPNS1, C19ORF6, PMEPA1, RHO	189	4911	19113	0.844269	1	1	100
SP_PIR_KEYWORDS	transmembrane	41	21.6931	0.938714	GJA10, SLC16A13, TMEM85, STX8, MFNG, APH1A, LDLR, ATP1B3, TNFRSF12A, SLC45A1, TMEM82, CD151, RABAC1, OR10G6, TMEM127, MCOLN2, IZUMO1, CD5, LY75, ZDHHC1, C9ORF5, B3GALT2, TMEM93, GOLT1B, SLC24A5, SLC22A20, IL6R, KRTCAP2, MCART1, CYB561, KCNK3, FAM134C, COX3, KIAA0922, SLC41A3, CCR2, EPOR, SPNS1, C19ORF6, PMEPA1, RHO	189	4973	19235	0.839065	1	0.999964	100
UP_SEQ_FEATURE	topological domain:Cytoplasmic	25	13.2275	0.972692	GJA10, SLC16A13, MFNG, STX8, ATP1B3, LDLR, TNFRSF12A, CD151, RABAC1, OR10G6, IZUMO1, CD5, LY75, B3GALT2, GOLT1B, SLC24A5, SLC22A20, IL6R, CYB561, KCNK3, KIAA0922, CCR2, EPOR, PMEPA1, RHO	189	3374	19113	0.749311	1	1	100
GOTERM_CC_FAT	GO:0031224~intrinsic to membrane	46	24.3386	0.982011	SLC16A13, GJA10, TMEM85, STX8, MFNG, APH1A, LDLR, ATP1B3, TNFRSF12A, SLC45A1, TMEM82, CD151, RABAC1, OR10G6, TMEM127, RHOB, MCOLN2, IZUMO1, CD5, LY75, ZDHHC1, C9ORF5, B3GALT2, TMEM93, GOLT1B, CNTN6, SLC24A5, SLC22A20, IL6R, KRTCAP2, MCART1, CYB561, KCNK3, FAM134C, KCTD10, COX3, KIAA0922, CCR2, SLC41A3, AMOT, RAP1A, EPOR, SPNS1, C19ORF6, PMEPA1, RHO	132	5485	12782	0.812094	1	0.999986	100
UP_SEQ_FEATURE	topological domain:Extracellular	18	9.52381	0.9881	LY75, GJA10, SLC16A13, ATP1B3, LDLR, TNFRSF12A, SLC24A5, SLC22A20, IL6R, CD151, OR10G6, KIAA0922, CCR2, EPOR, IZUMO1, CD5, PMEPA1, RHO	189	2719	19113	0.669469	1	1	100
GOTERM_CC_FAT	GO:0016021~integral to membrane	43	22.7513	0.989498	GJA10, SLC16A13, TMEM85, STX8, MFNG, APH1A, LDLR, ATP1B3, TNFRSF12A, SLC45A1, TMEM82, CD151, RABAC1, OR10G6, TMEM127, MCOLN2, IZUMO1, CD5, LY75, ZDHHC1, C9ORF5, B3GALT2, TMEM93, GOLT1B, SLC24A5, SLC22A20, IL6R, KRTCAP2, MCART1, CYB561, KCNK3, FAM134C, KCTD10, COX3, KIAA0922, SLC41A3, CCR2, AMOT, EPOR, SPNS1, C19ORF6, PMEPA1, RHO	132	5297	12782	0.786074	1	0.999997	100
Annotation Cluster 70	Enrichment Score: 0.010659827587641947
Category	Term	Count	%	PValue	Genes	List Total	Pop Hits	Pop Total	Fold Enrichment	Bonferroni	Benjamini	FDR
GOTERM_BP_FAT	GO:0045944~positive regulation of transcription from RNA polymerase II promoter	3	1.5873	0.908889	NRL, AATF, APBB1	145	371	13528	0.75442	1	0.999999	100
GOTERM_BP_FAT	GO:0010628~positive regulation of gene expression	4	2.1164	0.950158	NRL, DNMT1, AATF, APBB1	145	581	13528	0.642317	1	1	100
GOTERM_BP_FAT	GO:0045893~positive regulation of transcription, DNA-dependent	3	1.5873	0.965029	NRL, AATF, APBB1	145	477	13528	0.586771	1	1	100
GOTERM_BP_FAT	GO:0051254~positive regulation of RNA metabolic process	3	1.5873	0.966302	NRL, AATF, APBB1	145	481	13528	0.581891	1	1	100
GOTERM_BP_FAT	GO:0010604~positive regulation of macromolecule metabolic process	5	2.6455	0.983563	NRL, DNMT1, AATF, IL6R, APBB1	145	857	13528	0.544321	1	1	100
GOTERM_BP_FAT	GO:0045941~positive regulation of transcription	3	1.5873	0.984595	NRL, AATF, APBB1	145	564	13528	0.496258	1	1	100
GOTERM_BP_FAT	GO:0006357~regulation of transcription from RNA polymerase II promoter	4	2.1164	0.985482	NRL, DNMT1, AATF, APBB1	145	727	13528	0.513324	1	1	100
GOTERM_BP_FAT	GO:0045935~positive regulation of nucleobase, nucleoside, nucleotide and nucleic acid metabolic process	3	1.5873	0.991372	NRL, AATF, APBB1	145	624	13528	0.448541	1	1	100
GOTERM_BP_FAT	GO:0051173~positive regulation of nitrogen compound metabolic process	3	1.5873	0.992905	NRL, AATF, APBB1	145	644	13528	0.434611	1	1	100
GOTERM_BP_FAT	GO:0010557~positive regulation of macromolecule biosynthetic process	3	1.5873	0.993568	NRL, AATF, APBB1	145	654	13528	0.427966	1	1	100
GOTERM_BP_FAT	GO:0031328~positive regulation of cellular biosynthetic process	3	1.5873	0.995264	NRL, AATF, APBB1	145	685	13528	0.408598	1	1	100
GOTERM_BP_FAT	GO:0009891~positive regulation of biosynthetic process	3	1.5873	0.995711	NRL, AATF, APBB1	145	695	13528	0.402719	1	1	100
Annotation Cluster 71	Enrichment Score: 0.005415304345129515
Category	Term	Count	%	PValue	Genes	List Total	Pop Hits	Pop Total	Fold Enrichment	Bonferroni	Benjamini	FDR
UP_SEQ_FEATURE	zinc finger region:C2H2-type 1	3	1.5873	0.971475	ZNF350, ZBTB41, ZNF618	189	542	19113	0.559743	1	1	100
UP_SEQ_FEATURE	zinc finger region:C2H2-type 4	3	1.5873	0.978532	ZNF350, ZBTB41, ZNF618	189	575	19113	0.527619	1	1	100
UP_SEQ_FEATURE	zinc finger region:C2H2-type 2	3	1.5873	0.983892	ZNF350, ZBTB41, ZNF618	189	608	19113	0.498982	1	1	100
UP_SEQ_FEATURE	zinc finger region:C2H2-type 3	3	1.5873	0.985752	ZNF350, ZBTB41, ZNF618	189	622	19113	0.487751	1	1	100
INTERPRO	IPR007087:Zinc finger, C2H2-type	3	1.5873	0.9977	ZNF350, ZBTB41, ZNF618	173	784	16659	0.368475	1	1	100
INTERPRO	IPR015880:Zinc finger, C2H2-like	3	1.5873	0.997973	ZNF350, ZBTB41, ZNF618	173	797	16659	0.362465	1	1	100
SMART	SM00355:ZnF_C2H2	3	1.5873	0.998281	ZNF350, ZBTB41, ZNF618	95	797	9079	0.359731	1	1	100
Annotation Cluster 72	Enrichment Score: 0.0013939775319906354
Category	Term	Count	%	PValue	Genes	List Total	Pop Hits	Pop Total	Fold Enrichment	Bonferroni	Benjamini	FDR
SP_PIR_KEYWORDS	transducer	4	2.1164	0.992261	OR10G6, CCR2, PLCG2, RHO	189	874	19235	0.465778	1	1	100
SP_PIR_KEYWORDS	receptor	8	4.2328	0.99582	LY75, OR10G6, LDLR, TNFRSF12A, CCR2, EPOR, IL6R, RHO	189	1583	19235	0.514327	1	1	100
INTERPRO	IPR017452:GPCR, rhodopsin-like superfamily	3	1.5873	0.995978	OR10G6, CCR2, RHO	173	726	16659	0.397912	1	1	100
INTERPRO	IPR000276:7TM GPCR, rhodopsin-like	3	1.5873	0.996016	OR10G6, CCR2, RHO	173	727	16659	0.397365	1	1	100
SP_PIR_KEYWORDS	g-protein coupled receptor	3	1.5873	0.997389	OR10G6, CCR2, RHO	189	816	19235	0.374164	1	1	100
PIR_SUPERFAMILY	PIRSF800006:rhodopsin-like G protein-coupled receptors	3	1.5873	0.998599	OR10G6, CCR2, RHO	92	686	7396	0.351565	1	1	100
GOTERM_BP_FAT	GO:0007166~cell surface receptor linked signal transduction	10	5.29101	0.998676	OR10G6, APH1A, SFRP2, CNTN6, CCR2, PLCG2, CSNK2B, GPSM2, AP3S1, RHO	145	1856	13528	0.502675	1	1	100
GOTERM_BP_FAT	GO:0007186~G-protein coupled receptor protein signaling pathway	4	2.1164	0.999643	OR10G6, CCR2, GPSM2, RHO	145	1123	13528	0.332312	1	1	100
